# Supplementary material for: Identification of Differentially Expressed Genes in Porcine Ovaries at Proestrus and Estrus Stages Using RNA-Seq Technique
Source: Biomed Res Int. 2018 Feb 14;2018:9150723. doi: 10.1155/2018/9150723 (PMC5832140; doi:10.1155/2018/9150723)
Supplement: Supplementary Materials — Table S1: primer sequences for the genes selected for qRT-PCR. Table S2: DEGs identified under certain filter criteria. Table S3: GO enrichment analysis of DEGs. Table S4: KEGG pathway analysis of DEGs. [file 9150723.f1.zip]

Archive with 6 entries (5 files):
- 9150723.f1/
- 9150723.f1/mat.9150723.v3.xlsx
- 9150723.f1/Table S1_BMRI_2153133.xls
- 9150723.f1/Table S2_BMRI_2153134.xlsx
- 9150723.f1/Table S3_BMRI_2153135.xlsx
- 9150723.f1/Table S4_BMRI_2153136.xlsx
