# Supplementary material for: Identification of Differentially Expressed Genes in Porcine Ovaries at Proestrus and Estrus Stages Using RNA-Seq Technique
Source: Biomed Res Int. 2018 Feb 14;2018:9150723. doi: 10.1155/2018/9150723 (PMC5832140; doi:10.1155/2018/9150723)
Supplement: Supplementary Materials — Table S1: primer sequences for the genes selected for qRT-PCR. Table S2: DEGs identified under certain filter criteria. Table S3: GO enrichment analysis of DEGs. Table S4: KEGG pathway analysis of DEGs. [file 9150723.f1.zip › 9150723.f1/mat.9150723.v3.xlsx]

## Sheet: Table S1
Gene name	primer sequence(5'-3')
CCR1-F	GGTGCTGCCTCTATTGGT
CCR1-R	CTGCTCTGCCTACACTGAT
HIF1A-F	CTCCAATGCCAGAACCTC
HIF1A-R	TGACTCAAAGCGACAGATA
EPCAM-F	GTCTACAGGCTGGTATTATTG
EPCAM-R	TCGCCCATCTCCTTTATC
SGK1-F	GCTGCTGAAATAGCCAGTG
SGK1-R	CAGAGTCCAAAGTCGGTAAG
INHBA-F	GGCGATGACACCGTGAAG
INHBA-R	TTACGACCTGGGTTACTGG
BSP1-F	TGGGCTGGCGTATCTGTA
BSP1-R	CTGGCATAGTCTGTGCTTCT
GAS6-F	TGGAGGTCAACGGCAAGG
GAS6-R	CGGGCAGCACTGAGGTTAG
YBX3-F	CTTGGCACTGTCAAATGGTTC
YBX3-R	CTTCTTGATGGCAGTCTGATGTA
MGMT-F	AGCAATCCTGTGCCCATCCTC
MGMT-R	GCCAGAAGCCACTCCTTGACG
ZP3-F	CAAAGCCACCCACCGTAA
ZP3-R	GCAGCCCAACCTCAAACC
RPL32-F	CGGAAGTTTCTGGTACACAATGTAA
RPL32-R	TGGAAGAGACGTTGTGAGCAA
F: fordward primer R: reverse primer

## Sheet: Table S2
Tracking_id	tracking_pos	ref_gene	proestrus	estrus	log2(fold_change)	p-val	q-val	entrez_id	uniprot_id	ref_pos	symbol	description
XLOC_000046	1:11703719-11756311	ENSSSCG00000004063	7.36131	17.5618	1.25441	0.0185	0.318694	100152509	F1SB29	1:11703720-11756311	-	-
XLOC_000079	1:23567748-23569823	-	34.9236	94.3592	1.43396	0.0418	0.457293	-	-	-	-	-
XLOC_000120	1:34520164-34545492	ENSSSCG00000004181	0.873955	2.98482	1.77201	0.03015	0.40241	397246	F1S3Q7	1:34523097-34543521	VNN1	vanin 1 [Source:HGNC Symbol;Acc:HGNC:12705]
XLOC_000177	1:50161027-50171193	ENSSSCG00000004260	12.8258	33.3711	1.37955	0.0236	0.364626	100152527	F1RTU7	1:50163018-50171193	FAM162B	family with sequence similarity 162, member B [Source:HGNC Symbol;Acc:HGNC:21549]
XLOC_000191	1:56995013-57010628	ENSSSCG00000026204	20.3114	78.4809	1.95005	0.0031	0.108475	-	I3LJQ3	1:56995037-57010628	SDHAF4	succinate dehydrogenase complex assembly factor 4 [Source:HGNC Symbol;Acc:HGNC:20957]
XLOC_000206	1:62447068-62456156	ENSSSCG00000004300	18.5469	61.2171	1.72275	0.0038	0.123239	100154764	F1S0G5	1:62447069-62456156	SMIM8	small integral membrane protein 8 [Source:HGNC Symbol;Acc:HGNC:21401]
XLOC_000258	1:84630683-84736206	ENSSSCG00000004414	0.342487	14.1905	5.37274	0.01675	0.302253	100152548	F1RZP7,K7GR89	1:84719535-84735860	CD164	CD164 molecule, sialomucin [Source:HGNC Symbol;Acc:HGNC:1632]
XLOC_000263	1:85279469-85282984	-	0.483732	8.3862	4.11574	0.0157	0.293255	-	-	-	-	-
XLOC_000360	1:119882398-119885894	-	3.27314	8.01944	1.29283	0.0163	0.29895	-	-	-	-	-
XLOC_000430	1:135810178-135906879	ENSSSCG00000004648	14.4426	70.526	2.28783	0.00055	0.0301579	-	F1SQG9	1:135810194-135906879	-	-
XLOC_000477	1:143053336-143074120	ENSSSCG00000004713	0.857974	6.27692	2.87105	0.00045	0.025875	100158178	F1SI56	1:143053337-143073905	TGM5	transglutaminase 5 [Source:HGNC Symbol;Acc:HGNC:11781]
XLOC_000698	1:200101913-200102210	ENSSSCG00000029839	1004.62	6189.36	2.62314	0.0223	0.356711	102723301	-	1:200101914-200102210	Metazoa_SRP	Metazoan signal recognition particle RNA [Source:RFAM;Acc:RF00017]
XLOC_000782	1:223761788-223775218	-	0.190781	1.19757	2.65012	0.0352	0.4255	-	-	-	-	-
XLOC_000832	1:227953192-227982135	-	0.504702	5.34718	3.40527	0.01645	0.300289	-	-	-	-	-
XLOC_000836	1:231957988-232197794	ENSSSCG00000005190	1.95166	5.04617	1.37049	0.00855	0.21275	100155995	F1SMQ7	1:231958097-232191301	NFIB	nuclear factor I/B [Source:HGNC Symbol;Acc:HGNC:7785]
XLOC_000852	1:241840368-241952538	ENSSSCG00000005205	6.9273	23.6955	1.77425	0.00305	0.106901	100520352	I3LH63,F1SMM2	1:241842299-241952442	KIAA2026	KIAA2026 [Source:HGNC Symbol;Acc:HGNC:23378]
XLOC_000881	1:247885442-248144476	ENSSSCG00000005243	3.53934	9.5977	1.43921	0.0218	0.352428	100511977	F1SJE6	1:247961314-248144476	-	-
XLOC_001003	1:276190750-276353695	ENSSSCG00000005425	5.89847	12.9261	1.13188	0.0296	0.398822	100152140	K7GM61,K7GQR8,F1SP53,K7GL05	1:276190886-276352741	SLC44A1	solute carrier family 44 (choline transporter), member 1 [Source:HGNC Symbol;Acc:HGNC:18798]
XLOC_001012	1:278334532-278339266	-	2.06208	9.29824	2.17286	0.02235	0.356711	-	-	-	-	-
XLOC_001065	1:294559916-294594851	ENSSSCG00000005529	0.327226	11.5158	5.13719	0.0317	0.409184	-	F1SLR0	1:294559949-294571745	MORN5	MORN repeat containing 5 [Source:HGNC Symbol;Acc:HGNC:17841]
XLOC_001108	1:299458569-299468048	ENSSSCG00000005594	2.54143e-33	1.05701	108.358	0.0295	0.398737	100154489	F1SKR5	1:299458570-299462246	WDR38	WD repeat domain 38 [Source:HGNC Symbol;Acc:HGNC:23745]
XLOC_001131	1:302640580-302692545	ENSSSCG00000005641	3.16787	8.57312	1.43631	0.03245	0.41241	100153921	F1RRW8	1:302643446-302691985	DNM1	dynamin 1 [Source:HGNC Symbol;Acc:HGNC:2972]
XLOC_001161	1:304979391-305098340	ENSSSCG00000005710	12.95	32.9258	1.34627	0.0389	0.445904	-	F1S0W7,F1S0X0	1:304979408-305098340	LAMC3	laminin, gamma 3 [Source:HGNC Symbol;Acc:HGNC:6494]
XLOC_001209	1:311079769-311091932	ENSSSCG00000005782	13.8689	34.3373	1.30793	0.0335	0.416925	100523885	F1RZ95	1:311079770-311091656	TM2D3	TM2 domain containing 3 [Source:HGNC Symbol;Acc:HGNC:24128]
XLOC_001247	1:313876994-313878962	ENSSSCG00000005842	31.0473	85.1768	1.45599	0.0154	0.289942	100512883	F1RVY3	1:313876995-313878962	TMEM141	transmembrane protein 141 [Source:HGNC Symbol;Acc:HGNC:28211]
XLOC_001458	1:59322088-59327162	ENSSSCG00000004283	13.4105	55.4659	2.04824	0.00995	0.228603	100301558	F1RTS2	1:59322090-59323218	-	-
XLOC_001536	1:84356981-84464579	ENSSSCG00000004390|ENSSSCG00000020883	5.73301	20.5462	1.84151	0.00245	0.091929	100523876|-	F1RT20|I3LFF3	1:84358199-84373672|1:84446264-84464489	SESN1|-	sestrin 1 [Source:HGNC Symbol;Acc:HGNC:21595]|-
XLOC_001549	1:85867146-85892950	ENSSSCG00000004401	0.702162	3.41381	2.28151	0.02565	0.376347	100037287	F1RT00	1:85867147-85892926	DDO	D-aspartate oxidase [Source:RefSeq peptide;Acc:NP_001090895]
XLOC_001604	1:103294245-103338047	-	4.87952	21.2043	2.11954	0.01985	0.331743	-	-	-	-	-
XLOC_001633	1:110205515-110280841	ENSSSCG00000004521	18.365	124.896	2.7657	0.003	0.105846	100156956	F1RPP0	1:110207694-110280839	MRO	protein maestro [Source:RefSeq peptide;Acc:NP_001177103]
XLOC_001673	1:122870204-122876114	-	0	2.88138	inf	0.0001	0.00857863	-	-	-	-	-
XLOC_001689	1:125538027-125688110	ENSSSCG00000004596	0.42023	1.74796	2.05642	0.0284	0.395345	-	F1RZH2	1:125538028-125667666	-	-
XLOC_001728	1:135790462-135810100	ENSSSCG00000004647	10.3106	25.9649	1.33243	0.02235	0.356711	100153076	F1SQH1	1:135790463-135810100	DTWD1	DTW domain containing 1 [Source:HGNC Symbol;Acc:HGNC:30926]
XLOC_001739	1:140842955-140861814	ENSSSCG00000004672	1.60261	4.65541	1.53848	0.007	0.185461	100126844	P50441	1:140842956-140861814	GATM	Glycine amidinotransferase, mitochondrial [Source:UniProtKB/Swiss-Prot;Acc:P50441]
XLOC_001890	1:169623131-169625670	-	0	1.13584	inf	5e-05	0.00483523	-	-	-	-	-
XLOC_001944	1:183954698-183958558	-	6.10525	14.1568	1.21338	0.0483	0.48448	-	-	-	-	-
XLOC_001980	1:199687495-199694722	ENSSSCG00000024699	962.085	5972.93	2.6342	0.0002	0.0143266	102723301	-	1:199694422-199694718	Metazoa_SRP	Metazoan signal recognition particle RNA [Source:RFAM;Acc:RF00017]
XLOC_001984	1:200006511-200006808	ENSSSCG00000029605	18.7675	190.39	3.34265	0.0064	0.173895	-	-	1:200006512-200006808	Metazoa_SRP	Metazoan signal recognition particle RNA [Source:RFAM;Acc:RF00017]
XLOC_001986	1:200171693-200179547	-	1.07276	9.5121	3.14843	0.0039	0.125336	-	-	-	-	-
XLOC_001987	1:200181452-200194989	-	23.442	573.73	4.6132	5e-05	0.00483523	-	-	-	-	-
XLOC_002103	1:231924049-231934841	-	1.38716	5.47519	1.98078	0.0067	0.179525	-	-	-	-	-
XLOC_002135	1:245001213-245034368	ENSSSCG00000005229	19.599	39.4341	1.00866	0.0484	0.484703	733630	E7CXS1	1:245001214-245032893	VLDLR	very low density lipoprotein receptor [Source:HGNC Symbol;Acc:HGNC:12698]
XLOC_002182	1:264086286-264105318	ENSSSCG00000005312|ENSSSCG00000018700	51.4539	1744.25	5.08318	0.02955	0.398822	100153191|-	F1SG04|-	1:264096731-264098460|1:264105054-264105311	SIT1|RNase_MRP	signaling threshold regulating transmembrane adaptor 1 [Source:HGNC Symbol;Acc:HGNC:17710]|RNase MRP [Source:RFAM;Acc:RF00030]
XLOC_002194	1:264506712-264514818	-	0.879957	5.33857	2.60095	0.02765	0.391126	-	-	-	-	-
XLOC_002302	1:286260055-286265344	-	1.23473	2.8125	1.18765	0.04185	0.457293	-	-	-	-	-
XLOC_002309	1:287904046-288142434	ENSSSCG00000005498	0.221311	4.21663	4.25194	0.00815	0.205928	397219	F1SMI4	1:287904367-288136642	PAPPA	pregnancy-associated plasma protein A, pappalysin 1 [Source:HGNC Symbol;Acc:HGNC:8602]
XLOC_002331	1:294544821-294559785	ENSSSCG00000005528	66.5156	168.357	1.33976	0.0427	0.458346	100154443	F1SLR1	1:294544843-294559785	NDUFA8	NADH dehydrogenase (ubiquinone) 1 alpha subcomplex, 8, 19kDa [Source:HGNC Symbol;Acc:HGNC:7692]
XLOC_002458	1:308722664-308737300	ENSSSCG00000005755	0.322583	1.65331	2.35762	0.03465	0.422094	-	F1S016,F1S015	1:308722839-308726785	SOHLH1	spermatogenesis and oogenesis specific basic helix-loop-helix 1 [Source:HGNC Symbol;Acc:HGNC:27845]
XLOC_002466	1:310224675-310225371	ENSSSCG00000027727	0.625476	3.11031	2.31403	0.03485	0.422469	-	I3LN09	1:310224676-310225371	-	-
XLOC_002469	1:310515465-310552869	-	0.70273	3.08525	2.13434	0.03325	0.41674	-	-	-	-	-
XLOC_002530	1:5673863-5674114	-	41.9765	199.19	2.24649	0.0406	0.454135	-	-	-	-	-
XLOC_002558	1:18163620-18163858	-	22.3598	209.875	3.23055	0.02565	0.376347	-	-	-	-	-
XLOC_002559	1:18291869-18292107	-	16.8829	206.547	3.61283	0.0333	0.41674	-	-	-	-	-
XLOC_002587	1:32353704-32353929	-	0	255.691	inf	5e-05	0.00483523	-	-	-	-	-
XLOC_002594	1:34609398-34609633	-	181.695	738.299	2.02268	0.0494	0.486792	-	-	-	-	-
XLOC_002612	1:42555742-42556017	-	262.373	1038.71	1.9851	0.01305	0.265429	-	-	-	-	-
XLOC_002613	1:42686009-42686286	-	98.9423	397.685	2.00697	0.00485	0.145125	-	-	-	-	-
XLOC_002614	1:42811921-42812195	-	121.724	343.061	1.49486	0.03845	0.443373	-	-	-	-	-
XLOC_002625	1:50482434-50482665	-	0	67.1762	inf	5e-05	0.00483523	-	-	-	-	-
XLOC_002627	1:52019071-52019352	-	11.11	282.787	4.66978	0.0015	0.0663462	-	-	-	-	-
XLOC_002652	1:66963908-66964122	-	0	149.856	inf	5e-05	0.00483523	-	-	-	-	-
XLOC_002653	1:68470546-68470788	-	0	35.0224	inf	0.00035	0.0217727	-	-	-	-	-
XLOC_002656	1:68706941-68707591	-	6.26776	19.7817	1.65814	0.03415	0.419723	-	-	-	-	-
XLOC_002689	1:88111777-88112050	-	8.94977	60.0897	2.74719	0.0278	0.391208	-	-	-	-	-
XLOC_002717	1:104875605-104875876	-	0	27.1241	inf	5e-05	0.00483523	-	-	-	-	-
XLOC_002720	1:106523918-106529019	-	0.620932	1.73429	1.48183	0.01695	0.303673	-	-	-	-	-
XLOC_002752	1:121257663-121257932	-	152.241	599.896	1.97835	0.01215	0.255932	-	-	-	-	-
XLOC_002777	1:128164748-128165405	-	0	1.55797	inf	0.00025	0.0168849	-	-	-	-	-
XLOC_002843	1:152219714-152219982	-	29.4989	191.255	2.69677	0.01015	0.230215	-	-	-	-	-
XLOC_002883	1:168169172-168169438	-	0	34.9101	inf	5e-05	0.00483523	-	-	-	-	-
XLOC_002900	1:175993217-175996040	-	2.0055	6.01148	1.58376	0.0125	0.258694	-	-	-	-	-
XLOC_002908	1:181304056-181306398	-	1.94217	5.52649	1.5087	0.0146	0.279833	-	-	-	-	-
XLOC_002911	1:182237631-182237876	-	10.6932	50.6111	2.24275	0.0434	0.461898	-	-	-	-	-
XLOC_002912	1:182522348-182522600	-	0	29.8169	inf	0.0001	0.00857863	-	-	-	-	-
XLOC_002961	1:202190279-202190615	-	18.7281	213.084	3.50815	0.0029	0.102829	-	-	-	-	-
XLOC_002975	1:205540139-205541290	-	11.7573	25.152	1.09712	0.0426	0.458346	-	-	-	-	-
XLOC_002979	1:207455061-207455261	-	0	493.744	inf	5e-05	0.00483523	-	-	-	-	-
XLOC_002982	1:207703627-207703827	-	0	493.744	inf	5e-05	0.00483523	-	-	-	-	-
XLOC_003006	1:217532340-217532606	-	49.1371	423.631	3.10792	0.0023	0.0881667	-	-	-	-	-
XLOC_003040	1:238296037-238296278	-	10.0611	51.5078	2.35601	0.038	0.440812	-	-	-	-	-
XLOC_003057	1:244996245-244998802	-	0.452205	1.34637	1.57403	0.03385	0.419429	-	-	-	-	-
XLOC_003090	1:257631508-257631804	-	8.39653	48.1113	2.51851	0.0399	0.45225	-	-	-	-	-
XLOC_003113	1:275876338-275876621	-	23.4352	110.216	2.23358	0.0434	0.461898	-	-	-	-	-
XLOC_003115	1:276405711-276406261	-	32.0869	106.655	1.7329	0.00265	0.0975411	-	-	-	-	-
XLOC_003130	1:284833013-284833284	-	4.23503	84.4115	4.317	0.04855	0.484703	-	-	-	-	-
XLOC_003196	1:302825963-302826221	-	91.5985	482.449	2.39698	0.0174	0.307974	-	-	-	-	-
XLOC_003245	10:10352537-10588822	ENSSSCG00000010816	4.78352	67.3399	3.81532	5e-05	0.00483523	-	K7GP29,K7GP64,F1S9L0	10:10354223-10478457	TGFB2	transforming growth factor, beta 2 [Source:HGNC Symbol;Acc:HGNC:11768]
XLOC_003266	10:15124440-15129031	ENSSSCG00000027103	26.8333	68.7854	1.35808	0.0246	0.369869	-	I3LD23	10:15124441-15129031	CNIH4	cornichon family AMPA receptor auxiliary protein 4 [Source:HGNC Symbol;Acc:HGNC:25013]
XLOC_003358	10:35228926-35317630	ENSSSCG00000026087	9.0645	34.1857	1.9151	0.00365	0.120393	100622488	I3LGA9	10:35240972-35317629	GKAP1	G kinase anchoring protein 1 [Source:HGNC Symbol;Acc:HGNC:17496]
XLOC_003366	10:36321360-36328690	ENSSSCG00000010972	49.7695	139.973	1.49181	0.0404	0.453814	100521815	F1SEC0	10:36321361-36328690	DCTN3	dynactin 3 (p22) [Source:HGNC Symbol;Acc:HGNC:2713]
XLOC_003367	10:36329732-36332326	ENSSSCG00000010973	29.1921	71.0926	1.28412	0.0341	0.419594	100522095	F1SEB9	10:36330148-36331804	RPP25L	ribonuclease P/MRP 25kDa subunit-like [Source:HGNC Symbol;Acc:HGNC:19909]
XLOC_003385	10:37937068-38118516	ENSSSCG00000011003	182.46	498.349	1.44958	0.0317	0.409184	733605	Q2EN80	10:38102519-38118493	NDUFB6	NADH dehydrogenase (ubiquinone) 1 beta subcomplex, 6, 17kDa [Source:HGNC Symbol;Acc:HGNC:7701]
XLOC_003400	10:44241603-44248652	ENSSSCG00000011014	2.29198	4.72877	1.04487	0.0486	0.484747	449001	F1SE52	10:44241604-44248652	BAMBI	-
XLOC_003471	10:63252987-63303596	ENSSSCG00000011104	12.2246	31.6178	1.37095	0.0427	0.458346	-	F1RUR7	10:63270452-63303596	CUL2	cullin 2 [Source:HGNC Symbol;Acc:HGNC:2552]
XLOC_003525	10:76375724-76390016	-	4.05085	14.638	1.85342	0.0499	0.489159	-	-	-	-	-
XLOC_003542	10:2449520-2547636	ENSSSCG00000010806	62.6692	176.124	1.49077	0.0324	0.41241	733670	Q3S853	10:2543423-2546894	RGS2	Regulator of G-protein signaling 2 [Source:UniProtKB/Swiss-Prot;Acc:Q3S853]
XLOC_003579	10:13117265-13422903	-	0.614784	2.19251	1.83443	0.03185	0.409184	-	-	-	-	-
XLOC_003670	10:29084682-29093914	ENSSSCG00000010926	2.34887	6.57207	1.48438	0.0282	0.39393	100511582	F1S5A0	10:29084688-29093914	SYT2	synaptotagmin II [Source:HGNC Symbol;Acc:HGNC:11510]
XLOC_003705	10:35416298-35427615	ENSSSCG00000022077	5.70207	19.8102	1.79669	0.00335	0.1157	100622692	I3LBX6	10:35416363-35427615	IDNK	idnK, gluconokinase homolog (E. coli) [Source:HGNC Symbol;Acc:HGNC:31367]
XLOC_003788	10:55985940-55988117	-	52.3896	287.982	2.45863	0.02275	0.36062	-	-	-	-	-
XLOC_003799	10:58251884-58256753	ENSSSCG00000011082	121.324	343.466	1.5013	0.03635	0.431058	102167371	F1RVH4	10:58251968-58255865	COMMD3	COMM domain containing 3 [Source:HGNC Symbol;Acc:HGNC:23332]
XLOC_003854	10:75596442-75601440	ENSSSCG00000027363	150.923	1199.22	2.99021	0.01125	0.245229	100739304	I3LDY2	10:75598419-75601440	-	-
XLOC_003873	10:894412-894652	-	17.7025	124.946	2.81928	0.0288	0.396839	-	-	-	-	-
XLOC_003987	10:38814262-38814449	-	2032.94	6215.48	1.6123	0.02845	0.395345	-	-	-	-	-
XLOC_004000	10:44378131-44378400	-	0	22.1884	inf	0.0001	0.00857863	-	-	-	-	-
XLOC_004033	10:57594326-57594589	-	5.1889	135.457	4.70626	0.0485	0.484703	-	-	-	-	-
XLOC_004057	10:65847703-65847982	-	55.1688	216.352	1.97146	0.007	0.185461	-	-	-	-	-
XLOC_004186	11:16097491-16123537	ENSSSCG00000009379	0.418157	1.90462	2.18739	0.03025	0.402986	100513679	F1RMD0	11:16100090-16123524	NEK3	NIMA-related kinase 3 [Source:HGNC Symbol;Acc:HGNC:7746]
XLOC_004301	11:71983267-72006790	ENSSSCG00000009500	0.423308	2.59842	2.61785	0.0194	0.328611	100153752	F1RP52	11:71983268-72006790	CLDN10	-
XLOC_004472	11:26201499-26215974	ENSSSCG00000009434	61.2495	438.761	2.84066	0.03355	0.416925	100625944	F1RJ89	11:26204988-26215014	RGCC	response gene to complement 32 protein [Source:RefSeq peptide;Acc:NP_001231156]
XLOC_004511	11:56040891-56065252	-	196.126	824.828	2.07231	0.00775	0.199856	-	-	-	-	-
XLOC_004564	11:78753336-78792502	-	0	1.97158	inf	0.00025	0.0168849	-	-	-	-	-
XLOC_004589	11:86582118-86614652	ENSSSCG00000009565	12.476	28.2853	1.18089	0.0349	0.422835	-	F1RN32,K7GQB9	11:86582119-86614652	GAS6	growth arrest-specific 6 [Source:HGNC Symbol;Acc:HGNC:4168]
XLOC_004603	11:224548-224803	-	39.7635	248.394	2.64311	0.0148	0.281637	-	-	-	-	-
XLOC_004718	11:25028786-25029082	-	106.813	10923.7	6.67623	5e-05	0.00483523	-	-	-	-	-
XLOC_004721	11:27877850-27878002	-	0	3683.63	inf	0.00015	0.0115208	-	-	-	-	-
XLOC_004727	11:34723104-34723349	-	10.6932	53.3233	2.31807	0.04245	0.458346	-	-	-	-	-
XLOC_004735	11:45115261-45115515	-	14.7883	139.056	3.23315	0.01605	0.296818	-	-	-	-	-
XLOC_004757	11:59268922-59269173	-	8.89246	73.7833	3.05264	0.04935	0.486751	-	-	-	-	-
XLOC_004805	11:85703681-85703937	-	0	26.9099	inf	0.0004	0.0238375	-	-	-	-	-
XLOC_004811	11:86633004-86633762	-	1.66911	6.86522	2.04022	0.04055	0.453814	-	-	-	-	-
XLOC_004813	11:86857505-86857947	-	23.5745	96.9709	2.04032	0.0132	0.266188	-	-	-	-	-
XLOC_004828	12:274515-287271	ENSSSCG00000017131	3.92273	16.7695	2.09591	0.00165	0.0709167	100523990	F1S006	12:274516-287165	FN3K	fructosamine 3 kinase [Source:HGNC Symbol;Acc:HGNC:24822]
XLOC_004954	12:15423157-15433726	ENSSSCG00000017297	7.59324	28.8939	1.92798	0.0011	0.0520056	100048996	F1RRW2	12:15423261-15433726	CYB561	cytochrome b561 [Source:HGNC Symbol;Acc:HGNC:2571]
XLOC_005023	12:20362155-20364505	ENSSSCG00000022199	11.7667	46.6252	1.9864	0.0025	0.0934754	-	I3LR44	12:20362156-20364503	TUBG2	tubulin, gamma 2 [Source:HGNC Symbol;Acc:HGNC:12419]
XLOC_005047	12:21508847-21510275	ENSSSCG00000017446	3.47268	16.0175	2.20553	0.0077	0.199534	-	F1S0K0	12:21508848-21510275	-	-
XLOC_005048	12:21536550-21540282	ENSSSCG00000017448	0.696082	2.6478	1.92746	0.04805	0.482883	100515339	F1S0J8	12:21536799-21540282	KRT19	keratin 19, type I [Source:HGNC Symbol;Acc:HGNC:6436]
XLOC_005075	12:23031759-23047779	ENSSSCG00000017496	60.4817	175.439	1.5364	0.01765	0.310334	100516461	F1RX93	12:23045707-23047364	MIEN1	migration and invasion enhancer 1 [Source:HGNC Symbol;Acc:HGNC:28230]
XLOC_005076	12:23070469-23079038	ENSSSCG00000017498	1.96174	14.8962	2.92474	0.0017	0.0721906	-	F1RWM4	12:23071450-23079034	PPP1R1B	protein phosphatase 1, regulatory (inhibitor) subunit 1B [Source:HGNC Symbol;Acc:HGNC:9287]
XLOC_005127	12:26395259-26407816	ENSSSCG00000017583	0.306259	2.41456	2.97894	0.01105	0.241861	100240723	K7GRJ4,F1RT59	12:26395260-26407113	SGCA	-
XLOC_005149	12:27282132-27288910	ENSSSCG00000017557	0.47634	2.2011	2.20816	0.0415	0.457293	100512012	F1RTB4	12:27282133-27288910	WFIKKN2	WAP, follistatin/kazal, immunoglobulin, kunitz and netrin domain containing 2 [Source:HGNC Symbol;Acc:HGNC:30916]
XLOC_005162	12:32299489-32308891	-	0.824819	2.21381	1.42438	0.04855	0.484703	-	-	-	-	-
XLOC_005228	12:40395064-40402937	-	0.343081	2.19538	2.67785	0.0199	0.332318	-	-	-	-	-
XLOC_005293	12:47140305-47143014	ENSSSCG00000017778|ENSSSCG00000028751	0.543831	2.16295	1.99177	0.0337	0.417813	-|-	F1RNA5|I3LII7	12:47140306-47140863|12:47142026-47143014	-|-	-|-
XLOC_005302	12:47714657-47718800	ENSSSCG00000017788	12.2533	28.8363	1.23472	0.03845	0.443373	100520331	F1RN86	12:47714658-47718800	TP53I13	tumor protein p53 inducible protein 13 [Source:HGNC Symbol;Acc:HGNC:25102]
XLOC_005316	12:49503181-49506226	ENSSSCG00000017814	1.78171	13.0061	2.86785	0.00095	0.0461444	-	F1RHI1	12:49503228-49506132	C17orf97	chromosome 17 open reading frame 97 [Source:HGNC Symbol;Acc:HGNC:33800]
XLOC_005479	12:1426941-1429264	-	101.661	280.846	1.46601	0.01155	0.247458	-	-	-	-	-
XLOC_005615	12:18760069-18767688	ENSSSCG00000017347	8.27948	36.5972	2.14412	0.03065	0.405774	100522512	F1RQZ8	12:18760152-18762638	HIGD1B	HIG1 hypoxia inducible domain family, member 1B [Source:HGNC Symbol;Acc:HGNC:24318]
XLOC_005742	12:26311427-26313388	-	6.28832	35.1395	2.48235	0.00245	0.091929	-	-	-	-	-
XLOC_005978	12:52663718-52708260	ENSSSCG00000017888	10.2873	72.4435	2.81599	0.02685	0.384928	-	F1RGN5	12:52679593-52704367	SLC13A5	solute carrier family 13 (sodium-dependent citrate transporter), member 5 [Source:HGNC Symbol;Acc:HGNC:23089]
XLOC_006078	12:57137182-57247817	-	25.578	75.0358	1.55268	0.0218	0.352428	-	-	-	-	-
XLOC_006087	12:58570231-58702485	ENSSSCG00000024467	0.147091	0.932187	2.66391	0.0499	0.489159	-	I3LS41	12:58571385-58702485	-	-
XLOC_006304	12:45642116-45642417	-	0	15.8332	inf	5e-05	0.00483523	-	-	-	-	-
XLOC_006308	12:46240184-46240449	-	22.3182	122.537	2.45693	0.02045	0.338316	-	-	-	-	-
XLOC_006320	12:48102051-48102335	-	62.5728	2558.33	5.35352	5e-05	0.00483523	-	-	-	-	-
XLOC_006371	12:55832164-55832438	-	330.895	2345.29	2.82532	5e-05	0.00483523	-	-	-	-	-
XLOC_006384	12:59864629-59866153	-	0.201216	0.73388	1.8668	0.0171	0.304948	-	-	-	-	-
XLOC_006385	12:60017707-60020794	-	0.457578	1.70375	1.89663	0.046	0.473923	-	-	-	-	-
XLOC_006490	13:26291236-26304508	ENSSSCG00000029708	9.31994	22.3676	1.26302	0.0165	0.300289	100622220	I3LHT7	13:26291237-26304508	SLC25A38	solute carrier family 25, member 38 [Source:HGNC Symbol;Acc:HGNC:26054]
XLOC_006530	13:31097004-31106760	ENSSSCG00000011299	11.7881	46.0378	1.96549	0.00035	0.0217727	100620511	K7GL65,F1SRC8	13:31097020-31106760	CLEC3B	C-type lectin domain family 3, member B [Source:HGNC Symbol;Acc:HGNC:11891]
XLOC_006645	13:47901661-47918048	ENSSSCG00000011486	16.7725	48.1695	1.52202	0.03445	0.421463	100157232	F1SGF9	13:47903731-47917819	-	-
XLOC_006855	13:105238632-105486983	ENSSSCG00000011727	9.91444	29.0493	1.5509	0.00995	0.228603	100513178	F1SJM0	13:105440738-105446892	PTX3	-
XLOC_006890	13:119873837-119884081	ENSSSCG00000020906	5.92489	12.9142	1.1241	0.0299	0.401086	-	I3L617,K7GRR3	13:119874407-119883953	TNFSF10	tumor necrosis factor (ligand) superfamily, member 10 [Source:HGNC Symbol;Acc:HGNC:11925]
XLOC_006895	13:121518225-121526239	ENSSSCG00000011756	0.197782	3.6044	4.18778	0.03675	0.432204	100521583	F1SH09	13:121518226-121525986	NLGN1	neuroligin 1 [Source:HGNC Symbol;Acc:HGNC:14291]
XLOC_006909	13:126750843-126765741	ENSSSCG00000011764	258.368	687.475	1.41188	0.0472	0.480469	100523751	F1SGC6	13:126750844-126765741	NDUFB5	NADH dehydrogenase (ubiquinone) 1 beta subcomplex, 5, 16kDa [Source:HGNC Symbol;Acc:HGNC:7700]
XLOC_007063	13:156115562-156123863	-	0.938821	4.32004	2.20212	0.02485	0.371267	-	-	-	-	-
XLOC_007073	13:157236223-157240243	-	3.80617	9.15244	1.26582	0.04075	0.454856	-	-	-	-	-
XLOC_007088	13:160336835-160394841	ENSSSCG00000011941	9.03252	21.7272	1.2663	0.02525	0.373051	100519335	F1SL39	13:160336836-160394841	IFT57	intraflagellar transport 57 [Source:HGNC Symbol;Acc:HGNC:17367]
XLOC_007172	13:203411535-203729564	ENSSSCG00000025119	50.4148	839.045	4.05683	5e-05	0.00483523	100624513	I3LT35	13:203411536-203632118	GRIK1	glutamate receptor, ionotropic, kainate 1 [Source:HGNC Symbol;Acc:HGNC:4579]
XLOC_007250	13:2714462-2738021	ENSSSCG00000026677	4.51513	11.7489	1.37969	0.02465	0.370098	-	I3LUX2	13:2714463-2738021	-	2-hydroxyacyl-CoA lyase 1 [Source:RefSeq peptide;Acc:NP_001193383]
XLOC_007260	13:6166081-6168681	-	3.50751	27.6716	2.97989	0.0401	0.452672	-	-	-	-	-
XLOC_007307	13:24871054-24994231	ENSSSCG00000028740	5.98483	12.1084	1.01663	0.0308	0.406243	100517189	I3L819	13:24871055-24994231	CTDSPL	CTD (carboxy-terminal domain, RNA polymerase II, polypeptide A) small phosphatase-like [Source:HGNC Symbol;Acc:HGNC:16890]
XLOC_007323	13:26322864-26337977	-	1.97909	7.27828	1.87876	0.0018	0.0750882	-	-	-	-	-
XLOC_007363	13:32577738-32609442	ENSSSCG00000029879	0.155679	1.04423	2.74579	0.03135	0.408183	397649	Q6YT39	13:32577739-32609442	LTF	lactotransferrin precursor [Source:RefSeq peptide;Acc:NP_999527]
XLOC_007376	13:33483926-33551414	ENSSSCG00000026281	13.4814	35.6747	1.40393	0.0136	0.269907	494015	F1SNT3	13:33483932-33528440	SCAP	SREBF chaperone [Source:HGNC Symbol;Acc:HGNC:30634]
XLOC_007398	13:34581375-34594251	ENSSSCG00000011361	4.69338	12.9741	1.46693	0.0239	0.366573	497236	F1SKK6	13:34582659-34594185	-	-
XLOC_007480	13:42816463-42859665	ENSSSCG00000011463	1.37214	3.2052	1.22399	0.0441	0.464929	-	I3LNN2,K7GPS8,K7GPZ0,F1SGL1	13:42816476-42839524	IL17RD	interleukin 17 receptor D [Source:HGNC Symbol;Acc:HGNC:17616]
XLOC_007490	13:44285409-44316736	ENSSSCG00000011478	1.57191	7.40759	2.23649	0.0064	0.173895	-	F1SGH8	13:44287542-44300509	FAM107A	family with sequence similarity 107, member A [Source:HGNC Symbol;Acc:HGNC:30827]
XLOC_007523	13:56308754-56618457	ENSSSCG00000011513	3.2447	7.07496	1.12464	0.0401	0.452672	-	Q6PU47	13:56593885-56594181	-	-
XLOC_007595	13:78557474-78576812	ENSSSCG00000011608	2.14071	5.14671	1.26556	0.0373	0.43626	-	F1SPG6	13:78557481-78576599	-	-
XLOC_007670	13:91433855-91442878	ENSSSCG00000011685	0.535189	1.66518	1.63756	0.01125	0.245229	-	F1SKE5	13:91441266-91442399	PAQR9	progestin and adipoQ receptor family member IX [Source:HGNC Symbol;Acc:HGNC:30131]
XLOC_007680	13:94320705-94353344	ENSSSCG00000011690	5.03478	12.047	1.25868	0.0195	0.329517	100518400	F1SKD1	13:94320965-94352358	PLSCR4	phospholipid scramblase 4 [Source:HGNC Symbol;Acc:HGNC:16497]
XLOC_007688	13:97521521-97543671	ENSSSCG00000011701	14.8891	48.176	1.69406	0.01385	0.273564	100522214	F1SKA9,F1SKB0	13:97522099-97543476	-	-
XLOC_007699	13:99058063-99060608	-	15.5436	34.7489	1.16065	0.0303	0.4034	-	-	-	-	-
XLOC_007712	13:103681268-103696666	ENSSSCG00000021495	8.95834	23.735	1.40571	0.0091	0.218267	100625570	I3LE73	13:103681269-103696666	C3orf33	chromosome 3 open reading frame 33 [Source:HGNC Symbol;Acc:HGNC:26434]
XLOC_007736	13:108941013-109180203	ENSSSCG00000021774	9.43315	22.3291	1.24312	0.05	0.489159	397634	Q864U6	13:109170833-109175561	B3GALNT1	beta-1,3-N-acetylgalactosaminyltransferase 1 (globoside blood group) [Source:HGNC Symbol;Acc:HGNC:918]
XLOC_007867	13:145913349-145922000	ENSSSCG00000028717	2.82292	18.9074	2.74369	0.0143	0.276575	-	I3LT05	13:145913350-145922000	-	ropporin-1A [Source:RefSeq peptide;Acc:NP_001165840]
XLOC_007883	13:147726442-147762654	ENSSSCG00000026990	290.968	876.519	1.59092	0.02285	0.36062	100627352	I3LKD2	13:147726443-147762654	FAM162A	-
XLOC_008065	13:204927389-204935672	-	0	4.47995	inf	0.0443	0.465653	-	-	-	-	-
XLOC_008071	13:206119809-206235889	ENSSSCG00000012036	17.0834	36.3542	1.08952	0.0348	0.422345	100524957	F1SHM2	13:206219931-206235889	C21orf59	chromosome 21 open reading frame 59 [Source:HGNC Symbol;Acc:HGNC:1301]
XLOC_008085	13:207879822-207888064	ENSSSCG00000012049	8.71782	37.3487	2.09902	0.00135	0.0607215	100621502	F1SGX7	13:207880013-207880402	-	-
XLOC_008106	13:213286139-213349714	ENSSSCG00000029219	11.9438	25.98	1.12114	0.04265	0.458346	100626262	I3LEV7	13:213286140-213348206	SH3BGR	-
XLOC_008121	13:216044020-216046817	ENSSSCG00000022857	0	165.731	inf	5e-05	0.00483523	100627480	I3LKR2	13:216044021-216046817	TFF3	-
XLOC_008210	13:29340352-29340918	-	5.42072	26.1438	2.26992	0.0352	0.4255	-	-	-	-	-
XLOC_008279	13:51097473-51101260	-	0.266358	1.38243	2.37576	0.0343	0.420595	-	-	-	-	-
XLOC_008280	13:51101611-51104222	-	0.290664	1.22627	2.07685	0.0471	0.48014	-	-	-	-	-
XLOC_008283	13:51333128-51339644	-	0.275313	1.3163	2.25734	0.0029	0.102829	-	-	-	-	-
XLOC_008305	13:58222815-58223577	-	0	0.759222	inf	0.0006	0.0319925	-	-	-	-	-
XLOC_008318	13:60161336-60163383	-	2.15705	5.87709	1.44604	0.02115	0.346394	-	-	-	-	-
XLOC_008322	13:66872580-66872825	-	10.6932	53.3233	2.31807	0.04245	0.458346	-	-	-	-	-
XLOC_008386	13:87442009-87442292	-	22.6691	110.67	2.28746	0.03685	0.43314	-	-	-	-	-
XLOC_008398	13:88874571-89299288	-	264.316	1150.61	2.12206	0.018	0.314151	-	-	-	-	-
XLOC_008411	13:94749366-94749661	-	49.9204	2479.93	5.63453	5e-05	0.00483523	-	-	-	-	-
XLOC_008429	13:108114736-108250439	-	25.752	116.701	2.18006	0.0466	0.476871	-	-	-	-	-
XLOC_008439	13:117010235-117011015	-	0.19669	2.53996	3.69081	0.01725	0.306339	-	-	-	-	-
XLOC_008459	13:121834143-121877853	-	28.269	181.131	2.67974	0.01415	0.274673	-	-	-	-	-
XLOC_008507	13:135871648-135871906	-	0	37.7582	inf	5e-05	0.00483523	-	-	-	-	-
XLOC_008605	13:168627376-168628576	-	0.124249	0.727628	2.54996	0.0348	0.422345	-	-	-	-	-
XLOC_008607	13:168732621-168733821	-	0.124249	0.727628	2.54996	0.0348	0.422345	-	-	-	-	-
XLOC_008655	13:198450360-198450642	-	42.6786	272.888	2.67673	0.00925	0.220086	-	-	-	-	-
XLOC_008665	13:203741772-203805733	-	46.564	743.137	3.99634	0.00035	0.0217727	-	-	-	-	-
XLOC_008670	13:206908755-206909172	-	2.36146	104.192	5.46343	0.00095	0.0461444	-	-	-	-	-
XLOC_008772	14:16164693-16199407	ENSSSCG00000026044	32.4142	76.8621	1.24565	0.03095	0.407366	100312971	I3LFX7	14:16164826-16199406	FDFT1	farnesyl-diphosphate farnesyltransferase 1 [Source:HGNC Symbol;Acc:HGNC:3629]
XLOC_008915	14:42856401-42856542	ENSSSCG00000028966	0	2932.46	inf	0.00045	0.025875	-	-	14:42856402-42856542	U4	U4 spliceosomal RNA [Source:RFAM;Acc:RF00015]
XLOC_008930	14:43874236-43890515	ENSSSCG00000009932	4.54115	13.8614	1.60994	0.0091	0.218267	100157459	F1RIS6	14:43874237-43888496	MMAB	methylmalonic aciduria (cobalamin deficiency) cblB type [Source:HGNC Symbol;Acc:HGNC:19331]
XLOC_008972	14:50477197-50480629	ENSSSCG00000010007	12.2384	35.9761	1.55562	0.00545	0.156476	100157687	F1RFC8	14:50477198-50480629	-	-
XLOC_009019	14:53363489-53366597	ENSSSCG00000010073	6.34466	19.0434	1.58568	0.00175	0.0737252	100152325	F1RL20	14:53363490-53366597	CHCHD10	coiled-coil-helix-coiled-coil-helix domain containing 10 [Source:HGNC Symbol;Acc:HGNC:15559]
XLOC_009026	14:53544319-53545789	-	273.381	1640.64	2.58527	0.01405	0.273731	-	-	-	-	-
XLOC_009115	14:66656304-66911535	ENSSSCG00000010204	1.72248	3.84305	1.15776	0.04245	0.458346	100154253	F1RG08	14:66692886-66911519	BICC1	BicC family RNA binding protein 1 [Source:HGNC Symbol;Acc:HGNC:19351]
XLOC_009151	14:78227137-78258583	ENSSSCG00000010250	19.0699	48.6348	1.35069	0.0174	0.307974	100155086	F1SUG3	14:78227138-78258366	VPS26A	VPS26 retromer complex component A [Source:HGNC Symbol;Acc:HGNC:12711]
XLOC_009209	14:92234658-92259048	ENSSSCG00000010348	0.154708	1.21715	2.9759	0.0038	0.123239	100512562	F1SEP9	14:92234659-92259048	CDHR1	cadherin-related family member 1 [Source:HGNC Symbol;Acc:HGNC:14550]
XLOC_009297	14:115655449-115766037	ENSSSCG00000010485|ENSSSCG00000022139|ENSSSCG00000029831	3.06309	8.80548	1.52341	0.00355	0.118939	-|-|-	F1SC65|I3LD94|I3L5W8	14:115760550-115763113|14:115679181-115716364|14:115744117-115746912	-|-|-	-|-|-
XLOC_009368	14:123706956-123768481	ENSSSCG00000029594	6.97762	19.7723	1.50268	0.00785	0.201701	100151782	I3LPN1	14:123734114-123768251	WBP1L	WW domain binding protein 1-like [Source:HGNC Symbol;Acc:HGNC:23510]
XLOC_009411	14:138093020-138108274	ENSSSCG00000010659	0.630568	11.4882	4.18735	0.0001	0.00857863	100155399	B8XY18	14:138093021-138108274	PNLIPRP1	-
XLOC_009470	14:148219518-148260182	ENSSSCG00000010749	0.166732	0.940315	2.49562	0.0252	0.373051	100157876	I3LTG6,F1SDL8	14:148219519-148260182	FAM196A	family with sequence similarity 196, member A [Source:HGNC Symbol;Acc:HGNC:33859]
XLOC_009477	14:150607122-150887541	ENSSSCG00000010756	39.92	90.4428	1.17989	0.03545	0.426583	100155050	F1SDK3	14:150607123-150887541	MGMT	O-6-methylguanine-DNA methyltransferase [Source:HGNC Symbol;Acc:HGNC:7059]
XLOC_009535	14:7446929-7698221	ENSSSCG00000009631	0	0.708962	inf	0.0005	0.0279934	100302365	C4TP28	14:7446930-7698221	PEBP4	Sus scrofa phosphatidylethanolamine-binding protein 4 (PEBP4), mRNA. [Source:RefSeq mRNA;Acc:NM_001162888]
XLOC_009557	14:13290614-13338894	ENSSSCG00000009676	4.46237	9.84917	1.14219	0.02775	0.391208	100525009	I3L8S4,F1RJR0	14:13293542-13338587	ZNF395	zinc finger protein 395 [Source:HGNC Symbol;Acc:HGNC:18737]
XLOC_009601	14:25517639-25789383	ENSSSCG00000009745	4.18162	12.6132	1.5928	0.01605	0.296818	-	F1RFQ8	14:25517652-25788741	ADGRD1	adhesion G protein-coupled receptor D1 [Source:HGNC Symbol;Acc:HGNC:19893]
XLOC_009617	14:30518843-30536047	ENSSSCG00000020756	4.61482	12.454	1.43226	0.02505	0.372424	100158166	F1RFN2,I3L785	14:30518903-30536047	FAM101A	family with sequence similarity 101, member A [Source:HGNC Symbol;Acc:HGNC:27051]
XLOC_009712	14:43693024-43751172	ENSSSCG00000009927	1.30972	7.1345	2.44555	0.00205	0.0821351	100153422	F1RIT4	14:43693025-43720090	-	-
XLOC_009745	14:49791736-49817225	ENSSSCG00000025869	5.5723	13.2477	1.24939	0.0311	0.407924	100156892	F1RFF2	14:49791737-49817225	-	-
XLOC_009777	14:53232925-53249920	ENSSSCG00000010063|ENSSSCG00000010064|ENSSSCG00000022566	369.483	1393.91	1.91556	0.04395	0.46473	100155535|100153094|100154313	F1RL38|F1RL37|I3L5Q9	14:53232926-53235595|14:53243675-53249920|14:53237524-53242400	DDT|-|-	-|-|-
XLOC_009797	14:54158092-54169399	-	0.53961	2.44407	2.1793	0.0449	0.469179	-	-	-	-	-
XLOC_009805	14:54541563-54544455	ENSSSCG00000010116	22.1936	51.0535	1.20187	0.01095	0.240166	100154310	F1RK74	14:54541564-54544455	SLC25A1	-
XLOC_009873	14:68099605-68123248	-	0	4.42497	inf	5e-05	0.00483523	-	-	-	-	-
XLOC_009896	14:76968097-77018840	ENSSSCG00000010233	5.1796	34.7738	2.74709	0.00115	0.053772	100153566	F1SUJ2	14:76968513-77003937	DNAJC12	DnaJ (Hsp40) homolog, subfamily C, member 12 [Source:HGNC Symbol;Acc:HGNC:28908]
XLOC_009948	14:85785822-85996708	ENSSSCG00000010325	1.37984	3.89496	1.4971	0.01	0.22901	-	F1S2E7	14:85796582-85996706	-	calcium-activated potassium channel subunit alpha-1 [Source:RefSeq peptide;Acc:NP_999384]
XLOC_010017	14:100716308-100718426	ENSSSCG00000010416	34.4032	82.3318	1.25891	0.04745	0.481593	100524111	F1SD14	14:100716655-100717407	ZNF32	zinc finger protein 32 [Source:HGNC Symbol;Acc:HGNC:13095]
XLOC_010044	14:112824465-112826975	-	395.05	2512.25	2.66887	0.02395	0.366573	-	-	-	-	-
XLOC_010078	14:118512130-118556366	ENSSSCG00000010526	29.5064	170.899	2.53404	0.03365	0.417437	100155615	F1S8X6	14:118548268-118556353	AVPI1	arginine vasopressin-induced 1 [Source:HGNC Symbol;Acc:HGNC:30898]
XLOC_010119	14:123520677-123534791	ENSSSCG00000010588	47.5536	147.105	1.62922	0.0092	0.219428	-	F1S854	14:123522331-123534493	-	-
XLOC_010218	14:151130024-151166682	-	26.3169	74.3926	1.49917	0.00695	0.185058	-	-	-	-	-
XLOC_010245	14:2571632-2571858	-	0	82.4306	inf	5e-05	0.00483523	-	-	-	-	-
XLOC_010310	14:29997030-29998948	-	0.178597	0.857606	2.2636	0.04085	0.455256	-	-	-	-	-
XLOC_010311	14:29999101-30000841	-	0.243959	1.12672	2.20741	0.0344	0.421336	-	-	-	-	-
XLOC_010315	14:30020131-30021159	-	0.14597	1.25663	3.10581	0.04185	0.457293	-	-	-	-	-
XLOC_010336	14:35778953-35779224	-	4.3241	36.6583	3.08366	0.0223	0.356711	-	-	-	-	-
XLOC_010345	14:41627198-41627451	-	36.2402	297.273	3.03613	0.01015	0.230215	-	-	-	-	-
XLOC_010360	14:47773585-47773824	-	0	119.462	inf	5e-05	0.00483523	-	-	-	-	-
XLOC_010369	14:49102161-49102434	-	23.5066	104.588	2.15357	0.03915	0.448045	-	-	-	-	-
XLOC_010386	14:52539635-52540090	-	4.08969	12.5259	1.61486	0.03905	0.447141	-	-	-	-	-
XLOC_010434	14:66472945-66473640	-	2.27119	12.1693	2.42172	0.01755	0.308831	-	-	-	-	-
XLOC_010465	14:81124945-81125940	-	71.913	144.326	1.005	0.04995	0.489159	-	-	-	-	-
XLOC_010504	14:96845515-96845755	-	53.486	249.873	2.22396	0.04125	0.457293	-	-	-	-	-
XLOC_010515	14:104872807-104874108	-	0.27968	1.91023	2.7719	0.01755	0.308831	-	-	-	-	-
XLOC_010536	14:112690352-112690581	-	207.63	1031.5	2.31266	0.02855	0.395959	-	-	-	-	-
XLOC_010580	14:123600124-123605032	-	0.189167	0.931754	2.30029	0.005	0.148155	-	-	-	-	-
XLOC_010582	14:124306346-124306616	-	15.9592	163.776	3.35926	0.0066	0.178418	-	-	-	-	-
XLOC_010613	14:146369872-146370307	-	4.6465	19.2739	2.05243	0.031	0.407366	-	-	-	-	-
XLOC_010675	15:28680627-28691388	-	0	158.294	inf	5e-05	0.00483523	-	-	-	-	-
XLOC_010877	15:91372619-91388421	ENSSSCG00000015981	0.68119	4.22183	2.63174	0.0091	0.218267	-	F1RZG3	15:91385314-91387717	HOXD10	homeobox D10 [Source:HGNC Symbol;Acc:HGNC:5133]
XLOC_010878	15:91391335-91393578	ENSSSCG00000015982	5.15346	11.7619	1.1905	0.0334	0.416925	100517431	F1RZG2	15:91391336-91393578	HOXD9	homeobox D9 [Source:HGNC Symbol;Acc:HGNC:5140]
XLOC_010903	15:98103847-98124678	ENSSSCG00000016020	13.3333	44.2612	1.731	0.0107	0.237623	100523472	F1RYL2	15:98104158-98124358	DUSP19	dual specificity phosphatase 19 [Source:HGNC Symbol;Acc:HGNC:18894]
XLOC_010952	15:112603785-112613717	ENSSSCG00000020929	4.52257	12.3068	1.44424	0.01385	0.273564	100739471	I3LDW4	15:112603786-112613717	-	-
XLOC_011009	15:121111578-121140410	ENSSSCG00000016130	0.143689	0.796642	2.47098	0.01155	0.247458	-	F1SHD3	15:121121008-121137870	ZDBF2	zinc finger, DBF-type containing 2 [Source:HGNC Symbol;Acc:HGNC:29313]
XLOC_011138	15:147812871-147835195	ENSSSCG00000016301	6.87468	41.208	2.58356	0.00745	0.194001	-	F1SM30	15:147812872-147835057	SAG	S-antigen; retina and pineal gland (arrestin) [Source:HGNC Symbol;Acc:HGNC:10521]
XLOC_011255	15:22547380-22595248	ENSSSCG00000015709	42.3556	354.43	3.06488	0.0124	0.257376	100157997	F1RY25	15:22548114-22594753	SLC35F5	solute carrier family 35, member F5 [Source:HGNC Symbol;Acc:HGNC:23617]
XLOC_011276	15:36230336-36234338	-	6.16834	15.7894	1.356	0.03315	0.416332	-	-	-	-	-
XLOC_011289	15:43295999-43299387	-	14.2559	100.956	2.8241	0.00055	0.0301579	-	-	-	-	-
XLOC_011417	15:79642992-79650152	-	5.60345	16.6841	1.57409	0.0131	0.265684	-	-	-	-	-
XLOC_011449	15:88882630-88890311	-	3.70407	18.0966	2.28853	0.0311	0.407924	-	-	-	-	-
XLOC_011487	15:97838122-97882305	ENSSSCG00000016018	21.2134	52.3596	1.30348	0.0364	0.431058	100152419	F1RYL4	15:97838123-97882305	FRZB	-
XLOC_011619	15:134143467-134232523	ENSSSCG00000016205	15.7714	43.5424	1.46511	0.04405	0.464929	100153546	F1SRW5	15:134145208-134232523	NHEJ1	nonhomologous end-joining factor 1 [Source:HGNC Symbol;Acc:HGNC:25737]
XLOC_011702	15:148069857-148071559	ENSSSCG00000029580	0.481833	16.1728	5.06889	0.00745	0.194001	-	I3LV56	15:148070122-148070319	-	-
XLOC_011772	15:2191375-2191606	-	0	69.176	inf	0.00015	0.0115208	-	-	-	-	-
XLOC_011775	15:3317192-3317430	-	13.4551	95.9519	2.83416	0.01965	0.330739	-	-	-	-	-
XLOC_011790	15:8676570-8676840	-	23.8151	172.84	2.85949	0.00535	0.154439	-	-	-	-	-
XLOC_011812	15:22537103-22541472	-	0.197736	1.39246	2.81599	0.0132	0.266188	-	-	-	-	-
XLOC_011819	15:32650034-32650296	-	63.124	267.827	2.08504	0.0323	0.41198	-	-	-	-	-
XLOC_011846	15:53994990-53995573	-	3.87553	16.2446	2.0675	0.0457	0.472491	-	-	-	-	-
XLOC_011917	15:76598811-76599058	-	269.41	1233.97	2.19543	0.0422	0.45783	-	-	-	-	-
XLOC_011919	15:77864398-77864555	-	0	9477.13	inf	5e-05	0.00483523	-	-	-	-	-
XLOC_011973	15:104674948-104675389	-	0	2.68533	inf	0.00075	0.0383564	-	-	-	-	-
XLOC_012037	15:126878915-126879178	-	47.5738	580.157	3.6082	0.00425	0.132191	-	-	-	-	-
XLOC_012053	15:133736751-133737085	-	6.35482	31.8017	2.32318	0.02845	0.395345	-	-	-	-	-
XLOC_012081	15:142162869-142172835	-	0.281114	0.865514	1.6224	0.0296	0.398822	-	-	-	-	-
XLOC_012195	16:34956481-34992624	ENSSSCG00000016893	365.3	1181.33	1.69326	0.02485	0.371267	-	F1SLQ3,I3LU33	16:34963055-34992624	NDUFS4	NADH dehydrogenase (ubiquinone) Fe-S protein 4, 18kDa (NADH-coenzyme Q reductase) [Source:HGNC Symbol;Acc:HGNC:7711]
XLOC_012198	16:35788146-35788802	ENSSSCG00000016896	1.05498	6.07086	2.52468	0.01435	0.276998	100519061	F1SLQ0	16:35788147-35788802	HSPB3	heat shock 27kDa protein 3 [Source:HGNC Symbol;Acc:HGNC:5248]
XLOC_012224	16:42832715-42874957	ENSSSCG00000027763	25.935	110.564	2.0919	0.00915	0.218726	100738470	I3L8Y0	16:42832716-42874957	NDUFAF2	NADH dehydrogenase (ubiquinone) complex I, assembly factor 2 [Source:HGNC Symbol;Acc:HGNC:28086]
XLOC_012326	16:74107251-74124923	ENSSSCG00000017065	184.475	600.03	1.70161	0.0122	0.256477	-	F1RQC9	16:74113145-74120120	MRPL22	mitochondrial ribosomal protein L22 [Source:HGNC Symbol;Acc:HGNC:14480]
XLOC_012429	16:22331823-22389296	ENSSSCG00000016833	3.47623	10.1293	1.54295	0.04985	0.489159	100623235	F1SNB9	16:22331824-22389296	CAPSL	calcyphosine-like [Source:HGNC Symbol;Acc:HGNC:28375]
XLOC_012432	16:22523598-22574265	ENSSSCG00000016836	5.69321	14.3046	1.32917	0.01475	0.281637	100515177	F1SNB7	16:22523649-22574196	NADK2	NAD kinase 2, mitochondrial [Source:HGNC Symbol;Acc:HGNC:26404]
XLOC_012529	16:51146934-51147954	-	35.7578	205.959	2.52603	0.0148	0.281637	-	-	-	-	-
XLOC_012582	16:61137231-61605625	ENSSSCG00000017019	0.267004	12.3143	5.52732	0.0002	0.0143266	-	F1RR75	16:61223091-61223318	-	-
XLOC_012656	16:85605579-85608350	ENSSSCG00000030301	5.16014	11.3788	1.14086	0.0395	0.44972	-	I3LDE8	16:85605580-85608350	MRPL36	mitochondrial ribosomal protein L36 [Source:HGNC Symbol;Acc:HGNC:14490]
XLOC_012669	16:1149973-1150228	-	0	65.7262	inf	5e-05	0.00483523	-	-	-	-	-
XLOC_012673	16:4648348-4648599	-	62.3639	765.12	3.6169	0.0014	0.0627053	-	-	-	-	-
XLOC_012692	16:17178058-17234018	-	46.1894	2064.26	5.48192	5e-05	0.00483523	-	-	-	-	-
XLOC_012791	16:51221344-51221622	-	31.5272	205.457	2.70417	0.01145	0.246807	-	-	-	-	-
XLOC_012795	16:52236560-52236800	-	15.519	132.2	3.09061	0.04085	0.455256	-	-	-	-	-
XLOC_012848	16:74428713-74428995	-	0	13.662	inf	0.0005	0.0279934	-	-	-	-	-
XLOC_012854	16:78082112-78082346	-	0	51.9999	inf	0.00445	0.136418	-	-	-	-	-
XLOC_012876	17:5737477-5797636	ENSSSCG00000006988	6.07399	23.2518	1.93662	0.00355	0.118939	-	F1SET2	17:5737478-5792714	PDGFRL	platelet-derived growth factor receptor-like [Source:HGNC Symbol;Acc:HGNC:8805]
XLOC_012952	17:30294308-30296939	ENSSSCG00000025589	194.231	542.626	1.48219	0.04705	0.47986	-	I3LCG7	17:30294309-30296939	LINC00493	long intergenic non-protein coding RNA 493 [Source:HGNC Symbol;Acc:HGNC:43430]
XLOC_012997	17:36827272-36835374	-	17.1601	40.3671	1.23412	0.02775	0.391208	-	-	-	-	-
XLOC_013009	17:37510680-37512409	ENSSSCG00000023159	89.7982	190.616	1.08591	0.0451	0.470114	-	-	17:37510789-37510864	SNORD64	Small Nucleolar RNA SNORD64 [Source:RFAM;Acc:RF00570]
XLOC_013024	17:39142052-39161149	ENSSSCG00000007199	0.240098	0.943878	1.97498	0.0386	0.4439	100516303	F1S866	17:39142053-39159527	SLC52A3	solute carrier family 52 (riboflavin transporter), member 3 [Source:HGNC Symbol;Acc:HGNC:16187]
XLOC_013037	17:39889063-39895519	ENSSSCG00000007219	3.71939	40.7585	3.45396	0.00495	0.146878	-	F1S7I1	17:39889064-39895519	-	-
XLOC_013042	17:40187155-40188384	ENSSSCG00000007227	47.6408	160.115	1.74884	0.00665	0.179087	100522839	B3W6M6	17:40187156-40188384	ID1	-
XLOC_013093	17:44351168-44381733	ENSSSCG00000007308	583.057	2084.76	1.83817	0.0435	0.462269	100154394	F2Z5I3	17:44379569-44381550	ROMO1	-
XLOC_013106	17:45802383-45828607	ENSSSCG00000025673	19.2664	46.9752	1.28581	0.01435	0.276998	100514259	I3L5E1	17:45802388-45828607	-	-
XLOC_013204	17:58679386-58744314	ENSSSCG00000007472	36.683	81.3937	1.1498	0.03135	0.408183	100141422	A5GHK6	17:58679438-58744300	BCAS4	-
XLOC_013238	17:65584606-65594592	ENSSSCG00000007510	0	3.86981	inf	5e-05	0.00483523	100144513	A5GFM8	17:65584607-65594592	C20orf85	chromosome 20 open reading frame 85 [Source:HGNC Symbol;Acc:HGNC:16216]
XLOC_013241	17:65950293-65951170	-	0	280.609	inf	5e-05	0.00483523	-	-	-	-	-
XLOC_013248	17:66846228-66869088	ENSSSCG00000007527	1.58077	6.55981	2.05303	0.00355	0.118939	100049663	A5A752	17:66846229-66869088	EDN3	Endothelin-3 [Source:UniProtKB/Swiss-Prot;Acc:A5A752]
XLOC_013400	17:36999750-37002097	ENSSSCG00000007165	30.5507	64.3672	1.07512	0.02925	0.398311	100157874	F1S8A5	17:36999751-37002049	MRPS26	mitochondrial ribosomal protein S26 [Source:HGNC Symbol;Acc:HGNC:14045]
XLOC_013436	17:39872173-39877422	ENSSSCG00000007226	27.1533	120.349	2.14803	0.00705	0.18609	100521232	F1S7H7	17:39872174-39877422	DEFB123	defensin, beta 123 [Source:HGNC Symbol;Acc:HGNC:18103]
XLOC_013653	17:3371126-3371384	-	67.4022	307.058	2.18765	0.0214	0.348877	-	-	-	-	-
XLOC_013658	17:5798152-5799472	-	4.19978	20.5211	2.28873	0.00585	0.164194	-	-	-	-	-
XLOC_013664	17:11948960-11949286	-	3.40169	21.9283	2.68847	0.0293	0.398311	-	-	-	-	-
XLOC_013688	17:16218430-16218729	-	0	5.88543	inf	0.0027	0.0983604	-	-	-	-	-
XLOC_013693	17:16565997-16566265	-	8.7135	169.247	4.27974	0.01055	0.235521	-	-	-	-	-
XLOC_013708	17:31287647-31288901	-	2.78666	7.25112	1.37966	0.02465	0.370098	-	-	-	-	-
XLOC_013709	17:31315692-31831327	-	0	2.04662	inf	0.04525	0.470755	-	-	-	-	-
XLOC_013712	17:31895771-31896020	-	0	70.1557	inf	5e-05	0.00483523	-	-	-	-	-
XLOC_013730	17:36256417-36256668	-	0	38.5837	inf	0.0308	0.406243	-	-	-	-	-
XLOC_013733	17:37590493-37591532	-	30.9862	78.457	1.34028	0.01385	0.273564	-	-	-	-	-
XLOC_013744	17:40168194-40168720	-	16.9965	48.1304	1.50171	0.0431	0.461012	-	-	-	-	-
XLOC_013772	17:44425728-44425890	-	0	3551.52	inf	5e-05	0.00483523	-	-	-	-	-
XLOC_013783	17:46266143-46266298	-	0	3185.3	inf	5e-05	0.00483523	-	-	-	-	-
XLOC_013839	17:67422172-67422433	-	133.77	356.138	1.41268	0.04705	0.47986	-	-	-	-	-
XLOC_013907	18:7959441-7965024	ENSSSCG00000016483	6.35483	112.792	4.14967	0.0014	0.0627053	100302368	F1SRS2	18:7959442-7965024	-	-
XLOC_013942	18:12892492-12981639	ENSSSCG00000016522	23.8621	101.236	2.08492	0.0012	0.0555	397609	P79281	18:12892533-12981639	PTF-BETA	Pleiotrophin [Source:UniProtKB/Swiss-Prot;Acc:P79281]
XLOC_013945	18:14307712-14321340	ENSSSCG00000027601	0.090066	2.00152	4.47397	0.00875	0.214466	100737678	F1SNI7	18:14307713-14321340	FAM180A	family with sequence similarity 180, member A [Source:HGNC Symbol;Acc:HGNC:33773]
XLOC_014124	18:55903101-55918196	ENSSSCG00000016751	1.19115	4.08596	1.77832	0.01695	0.303673	100514142	F1SSG0	18:55903102-55918196	GCK	glucokinase (hexokinase 4) [Source:HGNC Symbol;Acc:HGNC:4195]
XLOC_014171	18:3181937-3183477	-	1.65661	5.12787	1.63013	0.03	0.401668	-	-	-	-	-
XLOC_014206	18:7234189-7239985	ENSSSCG00000016466	14.1561	30.9986	1.13079	0.01875	0.320664	100521480	F1SRV4	18:7234190-7239985	GSTK1	glutathione S-transferase kappa 1 [Source:HGNC Symbol;Acc:HGNC:16906]
XLOC_014227	18:9459281-9655298	ENSSSCG00000016494	32.7635	346.565	3.40296	0.04545	0.471682	-	F1SRQ1	18:9534503-9629366	BRAF	B-Raf proto-oncogene, serine/threonine kinase [Source:HGNC Symbol;Acc:HGNC:1097]
XLOC_014251	18:13053753-13057623	ENSSSCG00000016523	13.435	57.3703	2.09431	0.0062	0.169544	-	F1SNJ2	18:13053754-13057623	PTN	pleiotrophin [Source:HGNC Symbol;Acc:HGNC:9630]
XLOC_014254	18:14322913-14397211	ENSSSCG00000016527	23.4149	48.0292	1.03648	0.0472	0.480469	-	F1SNI6	18:14325774-14367417	SLC13A4	solute carrier family 13 (sodium/sulfate symporter), member 4 [Source:HGNC Symbol;Acc:HGNC:15827]
XLOC_014278	18:17510921-17514470	-	0	2.92824	inf	5e-05	0.00483523	-	-	-	-	-
XLOC_014283	18:19394593-19541069	ENSSSCG00000016557	3.45818	29.9219	3.11311	0.0089	0.21615	397476	P09954	18:19472689-19479095	-	Carboxypeptidase A1 [Source:UniProtKB/Swiss-Prot;Acc:P09954]
XLOC_014309	18:21699124-21702395	ENSSSCG00000016593	37.8352	91.0554	1.26702	0.0308	0.406243	100270722	B9V4F0	18:21699125-21702395	ARF5	-
XLOC_014315	18:24935975-25158244	ENSSSCG00000016600	9.57984	41.5664	2.11734	0.0038	0.123239	100524656	F1SMK5	18:25128701-25129813	TMEM229A	transmembrane protein 229A [Source:HGNC Symbol;Acc:HGNC:37279]
XLOC_014398	18:49412173-49413913	-	0	27.1254	inf	5e-05	0.00483523	-	-	-	-	-
XLOC_014433	18:55874741-55880085	-	0.218068	1.49192	2.77432	0.00605	0.167378	-	-	-	-	-
XLOC_014513	18:16567741-16568261	-	1.105	8.13855	2.88073	0.01365	0.270647	-	-	-	-	-
XLOC_014528	18:19838160-19838667	-	1.80126	7.53991	2.06554	0.049	0.485098	-	-	-	-	-
XLOC_014565	18:32507306-32507586	-	8.71406	85.2588	3.29043	0.02435	0.369473	-	-	-	-	-
XLOC_014606	18:47956244-47956452	-	317.778	3163.91	3.31561	0.00615	0.16861	-	-	-	-	-
XLOC_014615	18:51509300-51509569	-	0	73.4003	inf	5e-05	0.00483523	-	-	-	-	-
XLOC_014846	2:11397711-11398899	-	7.74436	17.2096	1.152	0.04455	0.467127	-	-	-	-	-
XLOC_015034	2:44078429-44082946	ENSSSCG00000028525	26.8717	83.7736	1.64041	0.04395	0.46473	733603	Q2HXZ9	2:44078431-44082946	-	-
XLOC_015037	2:44178013-44417161	ENSSSCG00000013373	6.60585	18.8498	1.51274	0.01145	0.246807	100511739	F1S9B1	2:44178023-44417161	SERGEF	secretion regulating guanine nucleotide exchange factor [Source:HGNC Symbol;Acc:HGNC:17499]
XLOC_015124	2:59065440-59075006	ENSSSCG00000013908	50.0893	104.075	1.05505	0.04445	0.466539	100627671	F1S910,I3LJ43	2:59065441-59068526	C19orf60	chromosome 19 open reading frame 60 [Source:HGNC Symbol;Acc:HGNC:26098]
XLOC_015143	2:60079149-60083155	ENSSSCG00000013875	38.647	109.132	1.49765	0.01985	0.331743	100517081	F1S960	2:60079150-60083113	USE1	unconventional SNARE in the ER 1 homolog (S. cerevisiae) [Source:HGNC Symbol;Acc:HGNC:30882]
XLOC_015164	2:61368991-61556036	ENSSSCG00000027013	4.68148	26.7733	2.51576	0.014	0.273731	100739130	I3LBC2	2:61441498-61534722	-	-
XLOC_015329	2:71884250-71886383	ENSSSCG00000013573	359.03	1180.34	1.71702	0.0198	0.331428	100524729	F1SCJ1	2:71884251-71886383	TRAPPC5	trafficking protein particle complex 5 [Source:HGNC Symbol;Acc:HGNC:23067]
XLOC_015331	2:71911699-71915174	ENSSSCG00000013581	81.1708	181.765	1.16304	0.0496	0.488311	100037981	F1SCH6	2:71911700-71913479	PET100	-
XLOC_015365	2:73816806-73818817	ENSSSCG00000013524	149.069	433.107	1.53874	0.0244	0.369473	100037978	F1SBU8	2:73816822-73818817	C19orf70	chromosome 19 open reading frame 70 [Source:HGNC Symbol;Acc:HGNC:33702]
XLOC_015519	2:85967320-85999486	ENSSSCG00000014080	14.1484	53.4521	1.91761	0.014	0.273731	100144446	F1S2I4	2:85967321-85990095	HMGCR	-
XLOC_015596	2:112804011-112824210	ENSSSCG00000024089	5.60927	24.423	2.12235	0.00165	0.0709167	100625150	I3LQ30	2:112821401-112822024	C5orf30	chromosome 5 open reading frame 30 [Source:HGNC Symbol;Acc:HGNC:25052]
XLOC_015657	2:135952000-135961330	ENSSSCG00000014253	0.291641	1.66704	2.51503	0.0302	0.402572	100514279	F1RKK4	2:135960220-135960465	CTXN3	cortexin 3 [Source:HGNC Symbol;Acc:HGNC:31110]
XLOC_015704	2:142698717-142737972	-	5.6973	20.4154	1.84131	0.02935	0.398398	-	-	-	-	-
XLOC_015975	2:6274332-6299647	ENSSSCG00000013012|ENSSSCG00000013013	40.9798	106.26	1.37461	0.01405	0.273731	100515425|100515705	F1RQS9|K7GMJ8,F1RQS8,K7GK78	2:6275115-6287159|2:6290009-6299042	SNX15|ARL2	sorting nexin 15 [Source:HGNC Symbol;Acc:HGNC:14978]|ADP-ribosylation factor-like 2 [Source:HGNC Symbol;Acc:HGNC:693]
XLOC_016208	2:32059726-32062086	-	0	80.9907	inf	0.0002	0.0143266	-	-	-	-	-
XLOC_016216	2:36165327-36655035	ENSSSCG00000013339	4.21658	16.5824	1.97551	0.0148	0.281637	100519534	F1SFZ6	2:36225783-36430350	ANO3	anoctamin 3 [Source:HGNC Symbol;Acc:HGNC:14004]
XLOC_016358	2:61368991-61556036	ENSSSCG00000027903|ENSSSCG00000028753	6.58906	17.7854	1.43255	0.0474	0.481593	-|-	I3LHS9|I3LF61	2:61524976-61556036|2:61491874-61503948	-|-	-|-
XLOC_016402	2:65381888-65384206	ENSSSCG00000013768	12.2485	35.6798	1.5425	0.0047	0.141833	-	F1SD56	2:65381889-65384075	-	uncharacterized protein LOC100513647 [Source:RefSeq peptide;Acc:NP_001231798]
XLOC_016424	2:66630069-66641758	ENSSSCG00000013728	29.2204	63.2875	1.11495	0.04315	0.461154	100520362	F2Z5J4	2:66630070-66641614	ASNA1	arsA arsenite transporter, ATP-binding, homolog 1 (bacterial) [Source:HGNC Symbol;Acc:HGNC:752]
XLOC_016461	2:69034017-69037799	-	1.79269e-09	1.0598	29.139	0.0097	0.225538	-	-	-	-	-
XLOC_016477	2:69722872-69725637	ENSSSCG00000013643	7.16699	16.8413	1.23256	0.03955	0.44972	100525560	F1S492	2:69723074-69725571	CDKN2D	cyclin-dependent kinase inhibitor 2D (p19, inhibits CDK4) [Source:HGNC Symbol;Acc:HGNC:1790]
XLOC_016567	2:75521564-75562894	ENSSSCG00000013491	0.0511672	1.53614	4.90795	0.03115	0.408076	100626455	F1S7Q6	2:75529575-75562894	TJP3	tight junction protein 3 [Source:HGNC Symbol;Acc:HGNC:11829]
XLOC_016624	2:78517684-78535171	ENSSSCG00000029050	177.442	463.046	1.38381	0.02655	0.38295	-	I3L9J0	2:78533530-78535171	-	mitochondrial ribosomal protein L55 [Source:RefSeq peptide;Acc:NP_001231893]
XLOC_016689	2:87305237-87333149	ENSSSCG00000025645	11.224	33.0919	1.5599	0.0061	0.168324	-	I3LV91	2:87305238-87333149	-	-
XLOC_016715	2:91864389-91990951	ENSSSCG00000014131	6.08641	13.9048	1.19192	0.0275	0.391126	-	I3L9I1,F1RF05	2:91864390-91953271	SSBP2	single-stranded DNA binding protein 2 [Source:HGNC Symbol;Acc:HGNC:15831]
XLOC_016719	2:93942377-94019220	ENSSSCG00000014137	0.182482	1.61157	3.14264	0.00875	0.214466	445513	F1REZ1	2:93942378-93981389	HAPLN1	hyaluronan and proteoglycan link protein 1 [Source:HGNC Symbol;Acc:HGNC:2380]
XLOC_016742	2:104928442-105023720	ENSSSCG00000025286	3.82505	13.4478	1.81381	0.00805	0.204861	-	I3LFJ9	2:104928920-105006277	-	-
XLOC_016789	2:124760241-124828122	ENSSSCG00000014219	17.4994	60.8489	1.79793	0.00985	0.227534	100312964	D0G6R7	2:124815022-124828122	CDO1	-
XLOC_016808	2:135347709-135369309	ENSSSCG00000029089	8.39246	20.7791	1.30797	0.04375	0.463767	100627580,100622328	F1RKL8	2:135348159-135359287	-	-
XLOC_016899	2:148355284-148760494	ENSSSCG00000030257	43.7941	2186.55	5.64177	0.0371	0.434638	-	I3L8B4	2:148405208-148427424	-	-
XLOC_016936	2:155929221-155930570	-	0	21.6108	inf	5e-05	0.00483523	-	-	-	-	-
XLOC_016940	2:156198114-156199465	-	0	22.2803	inf	5e-05	0.00483523	-	-	-	-	-
XLOC_017040	2:5115579-5115829	-	11.0896	72.7285	2.71331	0.04755	0.481593	-	-	-	-	-
XLOC_017043	2:5198965-5199934	-	0.308193	2.87879	3.22355	0.02255	0.358291	-	-	-	-	-
XLOC_017044	2:5202236-5202482	-	20.9887	158.409	2.91597	0.03395	0.419594	-	-	-	-	-
XLOC_017068	2:15834154-15834401	-	0	45.2325	inf	5e-05	0.00483523	-	-	-	-	-
XLOC_017091	2:19063059-19063732	-	0.284375	3.31061	3.54123	0.0178	0.31194	-	-	-	-	-
XLOC_017141	2:48625223-48625489	-	23.2322	128.538	2.468	0.0355	0.426939	-	-	-	-	-
XLOC_017267	2:83560544-83561052	-	0.726491	4.81564	2.72871	0.01675	0.302253	-	-	-	-	-
XLOC_017318	2:111863773-111864017	-	216.42	747.129	1.78752	0.0175	0.308717	-	-	-	-	-
XLOC_017319	2:111995879-111996123	-	216.42	747.129	1.78752	0.0175	0.308717	-	-	-	-	-
XLOC_017322	2:116300730-116300972	-	21.3718	199.507	3.22266	0.0159	0.295951	-	-	-	-	-
XLOC_017324	2:117048298-117052688	-	0.554194	1.77187	1.67681	0.0293	0.398312	-	-	-	-	-
XLOC_017345	2:133115282-133115555	-	126.912	716.975	2.49809	0.02455	0.369869	-	-	-	-	-
XLOC_017381	2:147562395-147565042	-	0.254163	1.45189	2.51411	0.0264	0.381822	-	-	-	-	-
XLOC_017428	2:159630148-159630405	-	25.3552	200.593	2.98392	0.00875	0.214466	-	-	-	-	-
XLOC_017443	3:723520-743194	ENSSSCG00000007546	29.6332	86.3509	1.543	0.03225	0.411836	-	F1RIY5	3:723521-743194	C7orf50	chromosome 7 open reading frame 50 [Source:HGNC Symbol;Acc:HGNC:22421]
XLOC_017460	3:4195585-4200542	-	2.6029	7.73386	1.57107	0.04015	0.452672	-	-	-	-	-
XLOC_017543	3:9837889-9848145	ENSSSCG00000007691	2.94777	8.09933	1.45818	0.0476	0.481593	396927	F1RKE0	3:9837963-9848145	ZP3	-
XLOC_017544	3:9856660-9881004	-	35.3607	108.179	1.61321	0.0335	0.416925	-	-	-	-	-
XLOC_017553	3:10645898-10649802	ENSSSCG00000007707	5.44378	15.2249	1.48375	0.0248	0.371267	100524550	F1RJN7	3:10645945-10649074	VPS37D	vacuolar protein sorting 37 homolog D (S. cerevisiae) [Source:HGNC Symbol;Acc:HGNC:18287]
XLOC_017630	3:18796318-18810914	ENSSSCG00000007808	2.82192	12.6854	2.16842	0.0072	0.189111	100625065	F1RFH6	3:18796319-18810914	NFATC2IP	nuclear factor of activated T-cells, cytoplasmic, calcineurin-dependent 2 interacting protein [Source:HGNC Symbol;Acc:HGNC:25906]
XLOC_017647	3:24461841-24514308	ENSSSCG00000007843	36.1756	99.9203	1.46576	0.03645	0.431058	100620271	F1RPD4	3:24462102-24475244	-	-
XLOC_017656	3:25531595-25569629	ENSSSCG00000007849	4.11373	14.6419	1.83158	0.004	0.126637	100525333	F1RPC8	3:25531596-25569629	CRYM	crystallin, mu [Source:HGNC Symbol;Acc:HGNC:2418]
XLOC_017688	3:32715228-32726099	-	49.0464	294.189	2.58452	0.02505	0.372424	-	-	-	-	-
XLOC_017741	3:40681054-40682773	-	3.97166	18.2373	2.19908	0.00435	0.134515	-	-	-	-	-
XLOC_017758	3:41348435-41353428	ENSSSCG00000007995	24.905	830.022	5.05865	5e-05	0.00483523	100525039	F1RGT4	3:41348589-41353426	FAM195A	family with sequence similarity 195, member A [Source:HGNC Symbol;Acc:HGNC:14142]
XLOC_017988	3:75426631-75441490	ENSSSCG00000008326	7.93065	24.9065	1.65101	0.01	0.22901	-	F1SLD3	3:75427114-75437891	TGFA	transforming growth factor, alpha [Source:HGNC Symbol;Acc:HGNC:11765]
XLOC_018007	3:77470688-77495096	ENSSSCG00000008349	11.5613	25.411	1.13615	0.03395	0.419594	100737807	F2Z5U6	3:77470689-77495096	CNRIP1	cannabinoid receptor interacting protein 1 [Source:HGNC Symbol;Acc:HGNC:24546]
XLOC_018076	3:99367914-99457295	-	0	85.1382	inf	0.0001	0.00857863	-	-	-	-	-
XLOC_018183	3:119302892-119340821	ENSSSCG00000008563	12.097	47.3843	1.96976	0.0026	0.0962	-	-	3:119337495-119338417	-	-
XLOC_018247	3:137420357-137528789	-	5.84167	18.0193	1.62509	0.0028	0.100966	-	-	-	-	-
XLOC_018290	3:1167017-1172147	ENSSSCG00000007556	33.1984	77.4896	1.22289	0.0278	0.391208	100521490	F1RIW5	3:1167385-1168908	PSMG3	proteasome (prosome, macropain) assembly chaperone 3 [Source:HGNC Symbol;Acc:HGNC:22420]
XLOC_018377	3:9934455-9937137	-	6.33032	15.2445	1.26794	0.04265	0.458346	-	-	-	-	-
XLOC_018503	3:25665440-25703625	ENSSSCG00000007851	6.55829	15.9755	1.28447	0.0292	0.397969	396846	F1RPC0	3:25665441-25679349	ZP2	-
XLOC_018504	3:25917433-25938640	ENSSSCG00000007853	41.9905	109.899	1.38805	0.01545	0.29037	100525810	F1RPB6	3:25917434-25938640	LYRM1	LYR motif containing 1 [Source:HGNC Symbol;Acc:HGNC:25074]
XLOC_018515	3:26904653-26905041	-	80.2702	216.203	1.42945	0.0233	0.363156	-	-	-	-	-
XLOC_018600	3:40861811-40865179	ENSSSCG00000007970	28.2303	57.5634	1.02791	0.0409	0.455336	100521261	F2Z4X7	3:40861812-40865179	POLR3K	polymerase (RNA) III (DNA directed) polypeptide K, 12.3 kDa [Source:HGNC Symbol;Acc:HGNC:14121]
XLOC_018619	3:41648836-41653135	ENSSSCG00000008012	53.3739	245.228	2.19992	0.0087	0.214466	-	F1RG31	3:41648938-41649925	HAGH	-
XLOC_018644	3:42401109-42404206	ENSSSCG00000008046	8.69085	19.8788	1.19366	0.04055	0.453814	100739035	F1RFA5	3:42403002-42404079	PGP	phosphoglycolate phosphatase [Source:HGNC Symbol;Acc:HGNC:8909]
XLOC_018693	3:48016459-48019164	-	224.612	697.868	1.63552	0.0039	0.125336	-	-	-	-	-
XLOC_018713	3:50008060-50034246	ENSSSCG00000028691	3.63358	27.5468	2.92242	5e-05	0.00483523	100623656	I3L648	3:50008178-50034005	SULT1C3	sulfotransferase family, cytosolic, 1C, member 3 [Source:HGNC Symbol;Acc:HGNC:33543]
XLOC_018870	3:79097681-79360994	ENSSSCG00000008355|ENSSSCG00000008356	2.68082	10.2066	1.92876	0.044	0.464796	-|-	F1SJ01|F1SIZ9	3:79099490-79099762|3:79353586-79358978	-|-	-|-
XLOC_018888	3:83577409-83582780	-	0	6.94567	inf	5e-05	0.00483523	-	-	-	-	-
XLOC_018931	3:98515211-98732588	ENSSSCG00000029485	0.135816	0.906211	2.73819	0.0357	0.427656	100624629	I3LN00	3:98538854-98709802	FBXO11	F-box protein 11 [Source:HGNC Symbol;Acc:HGNC:13590]
XLOC_018971	3:107607783-107611548	ENSSSCG00000008480	90.7793	265.976	1.55086	0.0067	0.179525	100519139	F1S4S8	3:107607784-107611124	MORN2	MORN repeat containing 2 [Source:HGNC Symbol;Acc:HGNC:30166]
XLOC_018982	3:108482890-108559793	ENSSSCG00000008488	4.09342	43.5703	3.41197	5e-05	0.00483523	100521083	F1S4R1	3:108495649-108559777	-	-
XLOC_018984	3:108625407-108634005	-	1.638	11.0855	2.75866	0.0027	0.0983604	-	-	-	-	-
XLOC_019002	3:114421592-114440320	ENSSSCG00000008516	223.074	661.633	1.56851	0.0419	0.457293	100514043	F2Z5F7	3:114427338-114440320	DPY30	dpy-30 histone methyltransferase complex regulatory subunit [Source:HGNC Symbol;Acc:HGNC:24590]
XLOC_019034	3:118590717-118601120	-	74.8725	338.858	2.17818	0.00225	0.0873517	-	-	-	-	-
XLOC_019038	3:118790386-118794251	ENSSSCG00000029305	2.31609	6.23403	1.42847	0.01955	0.329838	100625689	I3LAJ1	3:118790387-118794251	FNDC4	fibronectin type III domain containing 4 [Source:HGNC Symbol;Acc:HGNC:20239]
XLOC_019162	3:2296937-2299515	-	0.12935	2.507	4.27661	0.0018	0.0750882	-	-	-	-	-
XLOC_019169	3:4562660-4562933	-	6.81423	129.539	4.24869	0.0237	0.36564	-	-	-	-	-
XLOC_019201	3:8467959-8468202	-	23.225	124.04	2.41706	0.036	0.429316	-	-	-	-	-
XLOC_019229	3:10816756-10816989	-	76.8859	397.879	2.37154	0.02125	0.34723	-	-	-	-	-
XLOC_019424	3:51868043-51868641	-	0	1.81624	inf	5e-05	0.00483523	-	-	-	-	-
XLOC_019426	3:52693831-52694086	-	11.8572	570.358	5.58804	0.00985	0.227534	-	-	-	-	-
XLOC_019428	3:54893279-54893574	-	0	60.7619	inf	5e-05	0.00483523	-	-	-	-	-
XLOC_019455	3:62414643-62414929	-	4.63432	78.7323	4.08653	0.031	0.407366	-	-	-	-	-
XLOC_019467	3:71584432-71584736	-	5.73743	30.9287	2.43047	0.03135	0.408183	-	-	-	-	-
XLOC_019520	3:90042335-90042843	-	0	2.84083	inf	5e-05	0.00483523	-	-	-	-	-
XLOC_019557	3:104442812-104443045	-	0	63.6018	inf	5e-05	0.00483523	-	-	-	-	-
XLOC_019601	3:112709457-112709869	-	23.5476	66.1452	1.49006	0.0427	0.458346	-	-	-	-	-
XLOC_019629	3:124848996-124849248	-	0	101.941	inf	5e-05	0.00483523	-	-	-	-	-
XLOC_019643	3:132343332-132343575	-	0	70.6367	inf	5e-05	0.00483523	-	-	-	-	-
XLOC_019652	3:134928461-134928699	-	0	81.6532	inf	0.02235	0.356711	-	-	-	-	-
XLOC_019878	4:49544597-49557417	-	3.73453	17.3592	2.2167	0.04685	0.478969	-	-	-	-	-
XLOC_019911	4:64727296-64745396	ENSSSCG00000006168	15.2861	52.6515	1.78426	0.045	0.469532	100152963	F1RWL5	4:64727532-64745314	PEX2	peroxisomal biogenesis factor 2 [Source:HGNC Symbol;Acc:HGNC:9717]
XLOC_019922	4:70341214-70379453	ENSSSCG00000006192	37.3756	92.2278	1.30311	0.0432	0.461154	100153212	F1RU12	4:70341215-70379453	LACTB2	-
XLOC_019964	4:82444712-82450222	ENSSSCG00000006243	4.97922	48.6469	3.28836	5e-05	0.00483523	-	F1RT66	4:82448788-82449354	PENK	proenkephalin [Source:HGNC Symbol;Acc:HGNC:8831]
XLOC_019987	4:87368560-87610320	ENSSSCG00000006276	84.6049	304.655	1.84836	0.0022	0.0866759	100153946	F1RSE5	4:87369054-87370589	CEBPD	CCAAT/enhancer binding protein (C/EBP), delta [Source:HGNC Symbol;Acc:HGNC:1835]
XLOC_020006	4:90745387-90767619	ENSSSCG00000006304	70.0886	166.71	1.25009	0.0486	0.484747	100154777	F1RPU8	4:90745388-90767619	MPC2	mitochondrial pyruvate carrier 2 [Source:HGNC Symbol;Acc:HGNC:24515]
XLOC_020032	4:96964961-96991894	ENSSSCG00000023957	1.64578	10.4389	2.66512	0.02025	0.335529	100621973	I3LIQ4	4:96987357-96990714	CFAP126	cilia and flagella associated protein 126 [Source:HGNC Symbol;Acc:HGNC:32325]
XLOC_020115	4:102288845-102298819	ENSSSCG00000006480	15.9949	42.1822	1.39902	0.02775	0.391208	780405	F1RP34	4:102288846-102294779	APOA1BP	-
XLOC_020162	4:104615008-104617469	ENSSSCG00000006559	178.351	667.12	1.90323	0.0272	0.388376	100145894	B2MU85	4:104615009-104617469	JTB	-
XLOC_020194	4:107086234-107095113	ENSSSCG00000006624	61.2838	163.161	1.41272	0.0079	0.20201	100152724	F1ST01	4:107086235-107095113	SELENBP1	selenium binding protein 1 [Source:HGNC Symbol;Acc:HGNC:10719]
XLOC_020237	4:109913105-110148551	ENSSSCG00000006701|ENSSSCG00000028402	0.710565	9.08581	3.67658	0.00055	0.0301579	100154153|-	F1SDB8|F1SDC0	4:110094460-110148302|4:109972623-109974014	CHD1L|-	chromodomain helicase DNA binding protein 1-like [Source:HGNC Symbol;Acc:HGNC:1916]|-
XLOC_020241	4:110308392-110310297	ENSSSCG00000025950	0.513676	80.916	7.29942	5e-05	0.00483523	-	-	4:110308451-110308614	U1	U1 spliceosomal RNA [Source:RFAM;Acc:RF00003]
XLOC_020393	4:141899269-141995163	-	7.05894e-09	1.6488	27.7993	0.04005	0.452672	-	-	-	-	-
XLOC_020538	4:36745291-36837248	ENSSSCG00000006053|ENSSSCG00000025937	2.8833	95.2059	5.04526	5e-05	0.00483523	-|100170128	J9JIL2|Q8WNE9	4:36747395-36761501|4:36836879-36837040	-|-	-|-
XLOC_020609	4:61809833-61908322	ENSSSCG00000006158	46.9652	133.426	1.50638	0.0252	0.373051	100152709	F1RX97	4:61813286-61908322	MRPS28	28S ribosomal protein S28, mitochondrial [Source:RefSeq peptide;Acc:NP_001172097]
XLOC_020727	4:95432216-95441285	-	11.0173	25.146	1.19056	0.0427	0.458346	-	-	-	-	-
XLOC_020744	4:97083416-97092271	ENSSSCG00000006354	4.38029	9.30553	1.08706	0.0329	0.414907	100524985	F1S1B0	4:97086932-97092102	TOMM40L	translocase of outer mitochondrial membrane 40 homolog (yeast)-like [Source:HGNC Symbol;Acc:HGNC:25756]
XLOC_020754	4:97371101-97372691	ENSSSCG00000006370	57.4519	149.12	1.37605	0.02995	0.401251	-	F1S179	4:97371110-97372691	TSTD1	thiosulfate sulfurtransferase (rhodanese)-like domain containing 1 [Source:HGNC Symbol;Acc:HGNC:35410]
XLOC_020778	4:98692322-98694598	ENSSSCG00000028090	5.72903	17.3685	1.60011	0.0157	0.293255	100620368	I3LTD4	4:98692816-98694598	DUSP23	dual specificity phosphatase 23 [Source:HGNC Symbol;Acc:HGNC:21480]
XLOC_020805	4:101047120-101129231	-	5.15122	13.266	1.36475	0.02825	0.394369	-	-	-	-	-
XLOC_020917	4:108068130-108083067	ENSSSCG00000027168	173.474	614.236	1.82408	0.0456	0.472317	100620434	I3L971	4:108068171-108082063	-	-
XLOC_021043	4:121458136-121458546	ENSSSCG00000018682	24.1254	93.47	1.95395	0.0117	0.249666	-	-	4:121458137-121458546	SCARNA2	Small Cajal body-specific RNA 2 [Source:RFAM;Acc:RF01268]
XLOC_021061	4:128207124-128249867	ENSSSCG00000006858	1.0528	6.43697	2.61215	0.00285	0.101905	100156959	F1S570	4:128207125-128249603	OLFM3	olfactomedin 3 [Source:HGNC Symbol;Acc:HGNC:17990]
XLOC_021083	4:134025994-134050701	-	12.1857	37.7092	1.62973	0.03495	0.422959	-	-	-	-	-
XLOC_021119	4:141341708-141356840	ENSSSCG00000006928	24.2117	55.2514	1.1903	0.0239	0.366573	100127155	A9ED91	4:141341709-141354291	LMO4	-
XLOC_021185	4:12049339-12049573	-	0	69.0416	inf	0.00015	0.0115208	-	-	-	-	-
XLOC_021225	4:18102683-18102921	-	13.4551	95.9519	2.83416	0.01965	0.330739	-	-	-	-	-
XLOC_021235	4:23552267-23552815	-	0	1.03947	inf	0.0017	0.0721906	-	-	-	-	-
XLOC_021252	4:37606423-37606855	-	0	2.59455	inf	0.0345	0.421832	-	-	-	-	-
XLOC_021257	4:39384846-39385108	-	9.17315	60.5237	2.72201	0.04885	0.485098	-	-	-	-	-
XLOC_021318	4:73822660-73822910	-	0	61.2569	inf	5e-05	0.00483523	-	-	-	-	-
XLOC_021323	4:74104907-74105777	-	0.777187	3.79612	2.28819	0.017	0.303673	-	-	-	-	-
XLOC_021325	4:74247068-74247476	-	7.83135	47.6922	2.60642	0.0107	0.237623	-	-	-	-	-
XLOC_021326	4:74250243-74251041	-	0.46408	4.23119	3.18862	0.01175	0.250231	-	-	-	-	-
XLOC_021346	4:79749911-79750138	-	0	89.3297	inf	0.025	0.372424	-	-	-	-	-
XLOC_021347	4:80714296-80714533	-	527.436	1585.55	1.58791	0.0341	0.419594	-	-	-	-	-
XLOC_021409	4:103611961-103612226	-	4.82772	69.5679	3.84901	0.04995	0.489159	-	-	-	-	-
XLOC_021414	4:104973883-104975709	-	1.54582	7.22981	2.22559	0.00365	0.120393	-	-	-	-	-
XLOC_021435	4:108936170-108936877	-	0	1.19258	inf	0.0003	0.0195183	-	-	-	-	-
XLOC_021448	4:110772706-110772967	-	1095.83	3548.53	1.69519	0.0172	0.306218	-	-	-	-	-
XLOC_021471	4:118976878-118977434	-	0	4.842	inf	5e-05	0.00483523	-	-	-	-	-
XLOC_021507	4:134019102-134021591	-	30.1577	108.239	1.84363	0.0024	0.0908541	-	-	-	-	-
XLOC_021631	5:8916284-8937237	ENSSSCG00000000142	1.27455	4.95619	1.95924	0.0008	0.0405238	100513010	F1SKJ4	5:8916285-8937001	FOXRED2	FAD-dependent oxidoreductase domain containing 2 [Source:HGNC Symbol;Acc:HGNC:26264]
XLOC_021632	5:8997015-9024821	ENSSSCG00000000144	65.0273	183.838	1.49931	0.01075	0.237988	100158080	F1SKJ2	5:8997100-9010837	TXN2	thioredoxin 2 [Source:HGNC Symbol;Acc:HGNC:17772]
XLOC_021704	5:18767131-18785719	ENSSSCG00000000260|ENSSSCG00000000261	83.9335	210.544	1.3268	0.0417	0.457293	100515544|100101923	F1SGE4|F1SGE3	5:18773958-18785719|5:18768002-18772057	SOAT2|IGFBP6	sterol O-acyltransferase 2 [Source:HGNC Symbol;Acc:HGNC:11178]|insulin-like growth factor binding protein 6 [Source:HGNC Symbol;Acc:HGNC:5475]
XLOC_021721	5:19645939-19647436	-	0.988687	7.07051	2.83823	0.00855	0.21275	-	-	-	-	-
XLOC_021771	5:22627237-22640696	ENSSSCG00000000359	101.832	370.586	1.86361	0.0017	0.0721906	100517399	F2Z5S5	5:22636700-22640696	-	-
XLOC_021777	5:22922459-22931636	-	0.543526	3.40663	2.64793	0.00935	0.220534	-	-	-	-	-
XLOC_021901	5:49157594-49172390	ENSSSCG00000000544	21.1465	65.2082	1.62463	0.02575	0.377035	396951	Q866H2	5:49160270-49172386	PTHLH	parathyroid hormone-like hormone [Source:HGNC Symbol;Acc:HGNC:9607]
XLOC_021934	5:58236540-58248923	ENSSSCG00000000594	0.518046	5.28688	3.35126	0.04905	0.485141	-	F1SQY6	5:58236575-58242816	RERGL	RERG/RAS-like [Source:HGNC Symbol;Acc:HGNC:26213]
XLOC_021957	5:64060506-64114783	ENSSSCG00000000633	89.4037	206.315	1.20645	0.03995	0.452334	100518125	F1SQ46,I3LQF8	5:64060706-64084599	YBX3	Y box binding protein 3 [Source:HGNC Symbol;Acc:HGNC:2428]
XLOC_021974	5:64827996-64857981	ENSSSCG00000000656	36.1115	91.3349	1.33871	0.0362	0.430368	100520839	I3LKE5,F1SPB9,H2F097	5:64827997-64857595	CLEC2B	C-type lectin domain family 2, member B [Source:HGNC Symbol;Acc:HGNC:2053]
XLOC_022122	5:87753568-87829064	ENSSSCG00000000875	2.48604	6.71852	1.43429	0.03555	0.426939	100153960	F1SRH0	5:87784470-87828141	NR1H4	nuclear receptor subfamily 1, group H, member 4 [Source:HGNC Symbol;Acc:HGNC:7967]
XLOC_022239	5:4158555-4163344	-	6.45251	24.104	1.90134	0.00855	0.21275	-	-	-	-	-
XLOC_022363	5:17250141-17272282	ENSSSCG00000029782	3.01231	24.0329	2.99606	0.00465	0.140924	396766	P00772	5:17250142-17272282	CELA1	chymotrypsin-like elastase family, member 1 [Source:HGNC Symbol;Acc:HGNC:3308]
XLOC_022650	5:65896864-65898189	ENSSSCG00000030876	0.133491	1.27409	3.25465	0.04525	0.470755	-	K7GQX8,K7GSG2	5:65897893-66089156	RBP5	-
XLOC_022657	5:66216249-66218190	ENSSSCG00000026877	71.8276	199.725	1.4754	0.02005	0.333513	100627746	I3LSR0	5:66216250-66218190	C12orf57	chromosome 12 open reading frame 57 [Source:HGNC Symbol;Acc:HGNC:29521]
XLOC_022659	5:66236636-66253976	ENSSSCG00000000679|ENSSSCG00000028373	2.43867	6.79906	1.47924	0.02185	0.3527	100155745|100157750	F1SLV1|I3LCN1	5:66246913-66253397|5:66237496-66246344	LRRC23|ENO2	leucine rich repeat containing 23 [Source:HGNC Symbol;Acc:HGNC:19138]|enolase 2 (gamma, neuronal) [Source:HGNC Symbol;Acc:HGNC:3353]
XLOC_022688	5:68424237-68446892	-	1.87841	7.16073	1.9306	0.0161	0.296818	-	-	-	-	-
XLOC_022694	5:69526299-69532814	ENSSSCG00000000738	3.16158	8.06837	1.35163	0.04385	0.464596	100511381	F1SKA1	5:69526435-69532789	RHNO1	RAD9-HUS1-RAD1 interacting nuclear orphan 1 [Source:HGNC Symbol;Acc:HGNC:28206]
XLOC_022738	5:80133306-80189077	-	27.382	139.879	2.35288	0.00285	0.101905	-	-	-	-	-
XLOC_022830	5:101077131-101088559	ENSSSCG00000000932	25.6694	73.5124	1.51794	0.0291	0.397881	100739079	F1SPX3	5:101077132-101088559	NTS	neurotensin [Source:HGNC Symbol;Acc:HGNC:8038]
XLOC_022913	5:10336163-10336427	-	36.0058	223.379	2.63319	0.01675	0.302253	-	-	-	-	-
XLOC_022953	5:19078187-19078415	-	15.8246	73.743	2.22033	0.03655	0.431154	-	-	-	-	-
XLOC_022983	5:24659534-24660166	-	3.28947	19.7774	2.58792	0.0221	0.355656	-	-	-	-	-
XLOC_023011	5:34716391-34716662	-	7.48513	65.7524	3.13494	0.03305	0.416058	-	-	-	-	-
XLOC_023058	5:56095839-56096232	-	23.2621	121.622	2.38635	0.02735	0.389733	-	-	-	-	-
XLOC_023094	5:69908364-69909297	-	0.901692	5.10045	2.49992	0.0234	0.363914	-	-	-	-	-
XLOC_023178	5:108910762-108911015	-	41.0741	212.394	2.37044	0.0288	0.396839	-	-	-	-	-
XLOC_023259	6:12263235-12268566	ENSSSCG00000023127	4.51824	93.3183	4.36833	0.00095	0.0461444	100621642	I3LJ52	6:12263236-12268566	-	-
XLOC_023418	6:40067285-40073936	ENSSSCG00000021374	38.5955	168.843	2.12918	0.0059	0.164944	-	I3LMB3	6:40067346-40070582	FXYD1	FXYD domain containing ion transport regulator 1 [Source:HGNC Symbol;Acc:HGNC:4025]
XLOC_023504	6:44591643-44609179	-	26.2359	68.0881	1.37586	0.02325	0.362908	-	-	-	-	-
XLOC_023548	6:46138112-46140695	ENSSSCG00000003053	5.55751	878.031	7.30369	0.00015	0.0115208	396806	P80964	6:46138657-46140689	BSP1	Seminal plasma protein pB1 [Source:UniProtKB/Swiss-Prot;Acc:P80964]
XLOC_023721	6:54301795-54314542	ENSSSCG00000025353	1.62831	16.624	3.35182	0.01745	0.308346	396579	-	6:54301796-54314510	TNNT1	troponin T type 1 (skeletal, slow) [Source:HGNC Symbol;Acc:HGNC:11948]
XLOC_023728	6:54537559-54542884	ENSSSCG00000003289	20.0692	69.989	1.80215	0.00555	0.157856	-	F1RMR5	6:54537560-54542884	ISOC2	isochorismatase domain containing 2 [Source:HGNC Symbol;Acc:HGNC:26278]
XLOC_023801	6:58546767-58551821	ENSSSCG00000028530	0.571578	2.15606	1.91537	0.01785	0.312559	-	I3LM41	6:58546768-58548863	TMEM52	transmembrane protein 52 [Source:HGNC Symbol;Acc:HGNC:27916]
XLOC_023805	6:58721295-58722841	-	1.96969	26.4835	3.74905	0.0133	0.266188	-	-	-	-	-
XLOC_023879	6:68806040-68816141	-	0.542371	3.51383	2.69569	0.0375	0.437397	-	-	-	-	-
XLOC_023883	6:69055982-69062638	ENSSSCG00000027215	1.38321	42.9265	4.95577	5e-05	0.00483523	100520911	F1SUW2	6:69055983-69062605	CTRC	-
XLOC_023950	6:77097064-77112262	ENSSSCG00000029558	0.0596458	0.875963	3.87638	0.018	0.314151	100623848	I3L7I6	6:77097065-77111217	EXTL1	exostosin-like glycosyltransferase 1 [Source:HGNC Symbol;Acc:HGNC:3515]
XLOC_023978	6:79045744-79047942	ENSSSCG00000027072	871.793	2987.34	1.7768	0.0446	0.467421	100038002	Q29307	6:79045745-79047942	ATPIF1	ATPase inhibitor, mitochondrial [Source:UniProtKB/Swiss-Prot;Acc:Q29307]
XLOC_023998	6:81613749-81636380	ENSSSCG00000023505	0.174627	11.6854	6.06429	0.00795	0.203045	-	I3LB65	6:81613750-81615874	-	-
XLOC_024001	6:81712262-81715856	ENSSSCG00000003594	34.8326	1306.39	5.229	5e-05	0.00483523	399532	Q3IA98	6:81714146-81715640	FABP3	fatty acid-binding protein, heart [Source:RefSeq peptide;Acc:NP_001093401]
XLOC_024116	6:100922051-100926335	ENSSSCG00000021338	11.4534	37.596	1.7148	0.0064	0.173895	-	I3LEL3	6:100922052-100926335	-	-
XLOC_024147	6:109879381-109907574	-	0	4.36505	inf	0.0001	0.00857863	-	-	-	-	-
XLOC_024202	6:135725482-135831126	ENSSSCG00000019990	0.654173	4.00273	2.61324	0.02075	0.340893	100316578	-	6:135736114-135736196	ssc-mir-101-2	ssc-mir-101-2 [Source:miRBase;Acc:MI0010679]
XLOC_024233	6:146102027-146147322	ENSSSCG00000028506	10.9745	26.4465	1.26892	0.01955	0.329838	100621520	I3L692	6:146104657-146147322	YIPF1	Yip1 domain family, member 1 [Source:HGNC Symbol;Acc:HGNC:25231]
XLOC_024401	6:10687963-10722206	-	2.21166	12.398	2.4869	0.007	0.185461	-	-	-	-	-
XLOC_024409	6:12248290-12255005	ENSSSCG00000023012|ENSSSCG00000030698	1.74841	43.0085	4.62051	0.01095	0.240166	-|-	I3LFP1|I3LHI7	6:12248355-12251406|6:12251931-12254985	-|-	-|-
XLOC_024482	6:25312477-25316745	ENSSSCG00000002780	28.5358	123.289	2.1112	0.00115	0.053772	100521665	F1S2I8	6:25312514-25316150	TPPP3	tubulin polymerization-promoting protein family member 3 [Source:HGNC Symbol;Acc:HGNC:24162]
XLOC_024542	6:40165745-40193714	ENSSSCG00000027989	0.328315	2.99274	3.18831	0.02605	0.37882	100624189	I3L9Z0,I3LSC8	6:40166080-40177771	FAM187B	family with sequence similarity 187, member B [Source:HGNC Symbol;Acc:HGNC:26366]
XLOC_024650	6:45951755-46078610	ENSSSCG00000003048	0	1.71194	inf	0.0332	0.416714	-	K7GSG9,F1RMX0	6:45981953-46078610	CXCL17	chemokine (C-X-C motif) ligand 17 [Source:HGNC Symbol;Acc:HGNC:19232]
XLOC_024690	6:48231316-48256099	ENSSSCG00000003109	24.7448	56.939	1.20229	0.0293	0.398311	100514771	F1RM05	6:48248387-48251217	TMEM160	transmembrane protein 160 [Source:HGNC Symbol;Acc:HGNC:26042]
XLOC_024709	6:49659883-49671930	ENSSSCG00000023153	11.6452	27.6099	1.24545	0.04235	0.458346	-	F1RIP9	6:49660058-49664924	-	-
XLOC_024715	6:49740227-49752981	ENSSSCG00000003147	11.1681	27.34	1.29163	0.03645	0.431058	445526	F1RIQ0	6:49740728-49745975	-	-
XLOC_024723	6:49986779-50014224	ENSSSCG00000022324	11.1621	27.5467	1.30327	0.03245	0.41241	100511995	I3LBV8	6:49991942-50014224	PPFIA3	protein tyrosine phosphatase, receptor type, f polypeptide (PTPRF), interacting protein (liprin), alpha 3 [Source:HGNC Symbol;Acc:HGNC:9247]
XLOC_024724	6:50015307-50018862	ENSSSCG00000003157	26.0352	63.0742	1.27659	0.0356	0.426939	100512352	F1RIN6	6:50015309-50018862	LIN7B	-
XLOC_024731	6:50111385-50118034	ENSSSCG00000003158	29.3407	63.9852	1.12483	0.0318	0.409184	397337	Q9TV69	6:50111386-50118034	DHDH	Trans-1,2-dihydrobenzene-1,2-diol dehydrogenase [Source:UniProtKB/Swiss-Prot;Acc:Q9TV69]
XLOC_024766	6:51672741-51688986	ENSSSCG00000003229	97.4795	218.419	1.16393	0.04765	0.481593	396614	Q6UAQ8,K7GSE9,K7GMA4	6:51672742-51688479	ETFB	electron-transfer-flavoprotein, beta polypeptide [Source:HGNC Symbol;Acc:HGNC:3482]
XLOC_024886	6:58129041-58134259	ENSSSCG00000021880	33.9803	72.8305	1.09985	0.04975	0.489159	100621355	I3LLG6	6:58129042-58134259	MXRA8	matrix-remodelling associated 8 [Source:HGNC Symbol;Acc:HGNC:7542]
XLOC_024971	6:69388622-69394891	ENSSSCG00000003467	0.373815	1.38233	1.88671	0.03055	0.405459	100522495	F1SUU2	6:69390944-69394891	SLC25A34	solute carrier family 25, member 34 [Source:HGNC Symbol;Acc:HGNC:27653]
XLOC_025032	6:75996930-75997332	ENSSSCG00000003546	4.97115	141.677	4.83289	0.0004	0.0238375	-	F1STV2	6:75996931-75997332	-	-
XLOC_025069	6:79407967-79411534	ENSSSCG00000027280|ENSSSCG00000028807|ENSSSCG00000030477	231.867	757.97	1.70884	0.03355	0.416925	-|-|-	-|-|-	6:79408210-79408283|6:79410562-79410696|6:79408844-79408976	SNORD99|SNORA16|SNORA61	Small nucleolar RNA SNORD99 [Source:RFAM;Acc:RF00608]|Small nucleolar RNA SNORA16B/SNORA16A family [Source:RFAM;Acc:RF00190]|Small nucleolar RNA SNORA61 [Source:RFAM;Acc:RF00420]
XLOC_025088	6:81613749-81636380	-	33.0023	524.511	3.99034	5e-05	0.00483523	-	-	-	-	-
XLOC_025321	6:138764543-139163760	ENSSSCG00000023243	3.90537	9.59912	1.29744	0.04505	0.469823	-	I3LDW7	6:138764544-138851088	-	-
XLOC_025348	6:147139814-147141562	-	3.31792	9.53915	1.52358	0.0411	0.456131	-	-	-	-	-
XLOC_025406	6:155499257-155509416	ENSSSCG00000003954	0	1.8455	inf	0.0078	0.200659	100520438	F1SFB7	6:155499258-155509416	FAM183A	family with sequence similarity 183, member A [Source:HGNC Symbol;Acc:HGNC:34347]
XLOC_025516	6:17026242-17026504	-	5.4294	35.9275	2.72623	0.0243	0.369473	-	-	-	-	-
XLOC_025517	6:17245079-17245342	-	20.9658	116.605	2.47552	0.0299	0.401086	-	-	-	-	-
XLOC_025545	6:30440046-30440313	-	7.29843	64.4382	3.14226	0.0431	0.461012	-	-	-	-	-
XLOC_025640	6:48330428-48330693	-	29.16	136.773	2.22972	0.0328	0.414382	-	-	-	-	-
XLOC_025712	6:57631109-57632118	-	0.835766	7.584	3.18179	0.0087	0.214466	-	-	-	-	-
XLOC_025738	6:64277005-64277266	-	15.8211	109.52	2.79128	0.02315	0.362678	-	-	-	-	-
XLOC_025756	6:73005457-73005792	-	10.4439	86.4371	3.04898	0.0113	0.245564	-	-	-	-	-
XLOC_025775	6:77173631-77173895	-	0	51.2382	inf	5e-05	0.00483523	-	-	-	-	-
XLOC_025779	6:79170695-79170962	-	29.8443	141.066	2.24084	0.0298	0.400502	-	-	-	-	-
XLOC_025821	6:88967297-88967558	-	154.928	444.394	1.52024	0.0359	0.429086	-	-	-	-	-
XLOC_025855	6:102634538-102634849	-	0	8.4452	inf	0.00015	0.0115208	-	-	-	-	-
XLOC_025856	6:102684111-102684366	-	0	30.6141	inf	0.02795	0.391208	-	-	-	-	-
XLOC_025959	6:154801050-154801286	-	0	50.7707	inf	5e-05	0.00483523	-	-	-	-	-
XLOC_025981	6:157742491-157742760	-	29.7393	276.23	3.21543	0.0062	0.169544	-	-	-	-	-
XLOC_026038	7:12713073-12733741	ENSSSCG00000001063	4.5332	10.2999	1.18403	0.02765	0.391126	100155795	F1RUJ5	7:12713074-12733740	MYLIP	myosin regulatory light chain interacting protein [Source:HGNC Symbol;Acc:HGNC:21155]
XLOC_026061	7:20739306-20748725	ENSSSCG00000001095	60.9727	163.975	1.42724	0.01975	0.331112	100515035	F1RUD8	7:20739307-20748725	GMNN	geminin, DNA replication inhibitor [Source:HGNC Symbol;Acc:HGNC:17493]
XLOC_026087	7:23062873-23068169	-	71.5641	187.848	1.39226	0.0196	0.33042	-	-	-	-	-
XLOC_026244	7:35451382-35466721	ENSSSCG00000001531	221.985	784.427	1.82118	0.03895	0.446237	100154606	F1RZ16	7:35451546-35466721	SNRPC	small nuclear ribonucleoprotein polypeptide C [Source:HGNC Symbol;Acc:HGNC:11157]
XLOC_026261	7:37248658-37250731	-	1.13315	5.10324	2.17108	0.04515	0.470405	-	-	-	-	-
XLOC_026323	7:45063077-45075197	-	135.118	794.01	2.55493	5e-05	0.00483523	-	-	-	-	-
XLOC_026371	7:54556146-54597356	ENSSSCG00000001780	5.45756	16.0896	1.5598	0.0084	0.21	100623036	F1RIF3	7:54556147-54596334	FAH	fumarylacetoacetate hydrolase (fumarylacetoacetase) [Source:HGNC Symbol;Acc:HGNC:3579]
XLOC_026388	7:57417804-57425005	ENSSSCG00000030131	19.5136	51.9893	1.41374	0.0195	0.329517	-	F1RIB1,I3LKX1	7:57417819-57425005	C15orf40	chromosome 15 open reading frame 40 [Source:HGNC Symbol;Acc:HGNC:28443]
XLOC_026570	7:83579872-83580200	ENSSSCG00000020439	188.916	937.744	2.31145	0.0057	0.161046	-	-	7:83579873-83580200	RNaseP_nuc	Nuclear RNase P [Source:RFAM;Acc:RF00009]
XLOC_026626	7:91815032-91862515	ENSSSCG00000002267	3.53469	14.7009	2.05625	0.0009	0.0446329	100156429	F1SA76	7:91815033-91862515	RGMA	repulsive guidance molecule family member a [Source:HGNC Symbol;Acc:HGNC:30308]
XLOC_026762	7:122215477-122220545	ENSSSCG00000002471	87.66	252.732	1.52762	0.0079	0.20201	100153902	Q6IEA3	7:122215478-122220545	ISG12(A)	-
XLOC_026854	7:134400748-134401079	ENSSSCG00000019556	228.175	2576.11	3.49698	0.0012	0.0555	-	-	7:134400749-134401079	7SK	7SK RNA [Source:RFAM;Acc:RF00100]
XLOC_026873	7:3147560-3270904	ENSSSCG00000000997	27.6951	82.3024	1.5713	0.0375	0.437397	100522260	F1RX09	7:3154140-3155711	PPP1R3G	protein phosphatase 1, regulatory subunit 3G [Source:HGNC Symbol;Acc:HGNC:14945]
XLOC_026943	7:22544482-22547649	ENSSSCG00000027958	3.70506	8.8566	1.25726	0.03345	0.416925	100153723	F1RQ93	7:22544483-22547649	-	-
XLOC_027043	7:27142712-27143699	ENSSSCG00000028813	0	1.54166	inf	5e-05	0.00483523	100520390	F1RU68	7:27142713-27143699	SFTA2	surfactant associated 2 [Source:HGNC Symbol;Acc:HGNC:18386]
XLOC_027058	7:27566695-27581075	ENSSSCG00000001402	7.3893	16.6689	1.17364	0.0433	0.461898	100154350	F1RTG4	7:27566956-27579123	NFKBIL1	nuclear factor of kappa light polypeptide gene enhancer in B-cells inhibitor-like 1 [Source:HGNC Symbol;Acc:HGNC:7800]
XLOC_027149	7:36546796-36549010	ENSSSCG00000001552	3.07471	54.1589	4.13868	0.00055	0.0301579	397407	P02703	7:36546797-36549010	CLPS	colipase, pancreatic [Source:HGNC Symbol;Acc:HGNC:2085]
XLOC_027210	7:43764020-43767456	ENSSSCG00000026568	18.5234	88.7378	2.2602	0.00025	0.0168849	100157902	F1RRM7,F1RRM1	7:43764021-43767087	DNPH1	2'-deoxynucleoside 5'-phosphate N-hydrolase 1 [Source:HGNC Symbol;Acc:HGNC:21218]
XLOC_027224	7:44942221-44955752	ENSSSCG00000001696	146.911	490.311	1.73875	0.0162	0.297887	100157118	F1RQV7	7:44942222-44955752	MRPL14	mitochondrial ribosomal protein L14 [Source:HGNC Symbol;Acc:HGNC:14279]
XLOC_027234	7:46110759-46160733	-	21.3715	119.766	2.48647	0.0003	0.0195183	-	-	-	-	-
XLOC_027302	7:57681779-57742304	ENSSSCG00000020586	3.11512	12.4978	2.00432	0.03045	0.40489	-	-	7:57683211-57683337	SCARNA15	Small Cajal body specific RNA 15 [Source:RFAM;Acc:RF00426]
XLOC_027331	7:61265679-61303086	ENSSSCG00000001864	0	1.08315	inf	0.00155	0.0682738	-	F1SJW9	7:61265680-61303086	TMEM266	transmembrane protein 266 [Source:HGNC Symbol;Acc:HGNC:26763]
XLOC_027362	7:64422083-64564591	ENSSSCG00000001919	3.00339	75.6999	4.65563	0.0313	0.408183	-	F1SIC4	7:64541622-64564587	REC114	REC114 meiotic recombination protein [Source:HGNC Symbol;Acc:HGNC:25065]
XLOC_027374	7:68667868-68695102	ENSSSCG00000001946	21.0811	53.1977	1.33542	0.03255	0.413187	100516143	F1SHK2	7:68669714-68695101	MBIP	MAP3K12 binding inhibitory protein 1 [Source:HGNC Symbol;Acc:HGNC:20427]
XLOC_027399	7:76951991-77006945	-	0	3.35061	inf	0.0001	0.00857863	-	-	-	-	-
XLOC_027420	7:80430402-80435921	ENSSSCG00000002006	199	535.678	1.4286	0.04705	0.47986	397572	F1SGM1	7:80433126-80435858	PSME1	-
XLOC_027440	7:81426698-81431178	ENSSSCG00000002040	51.2291	112.422	1.13389	0.0498	0.489159	100157971	F1S9B7	7:81426699-81431178	MRPL52	mitochondrial ribosomal protein L52 [Source:HGNC Symbol;Acc:HGNC:16655]
XLOC_027549	7:95388197-95392767	ENSSSCG00000002279	0.139386	2.91208	4.3849	0.01855	0.319039	-	F1SA58	7:95388198-95392767	GPX2	glutathione peroxidase 2 [Source:HGNC Symbol;Acc:HGNC:4554]
XLOC_027557	7:97579422-97622799	ENSSSCG00000022069	8.03861	24.3504	1.59893	0.01635	0.299351	100151845	I3LQK4	7:97611001-97622535	PIGH	phosphatidylinositol glycan anchor biosynthesis, class H [Source:HGNC Symbol;Acc:HGNC:8964]
XLOC_027558	7:97650734-97721315	ENSSSCG00000002295	65.3376	216.77	1.73018	0.02055	0.339179	404692	F1SA25	7:97693025-97721130	VTI1B	-
XLOC_027588	7:102781568-102791907	ENSSSCG00000002349	7.90074	17.8765	1.17801	0.0364	0.431058	100158115	F1S3I9	7:102786805-102791429	ACOT4	acyl-CoA thioesterase 4 [Source:HGNC Symbol;Acc:HGNC:19748]
XLOC_027642	7:118027899-118076923	-	21.0793	253.439	3.58774	0.01285	0.262616	-	-	-	-	-
XLOC_027661	7:120287747-120294465	ENSSSCG00000002448	6.89344	54.8169	2.99132	5e-05	0.00483523	-	F1SD84	7:120287748-120294465	-	-
XLOC_027662	7:120296366-120298214	ENSSSCG00000002449	772.608	2639.84	1.77264	0.0032	0.11106	100739619	F1SD73	7:120296367-120298214	NDUFB1	NADH dehydrogenase (ubiquinone) 1 beta subcomplex, 1, 7kDa [Source:HGNC Symbol;Acc:HGNC:7695]
XLOC_027723	7:131249481-131253801	ENSSSCG00000002557	10.0395	30.3789	1.59739	0.0329	0.414907	-	F1S972	7:131249482-131253801	NUDT14	nudix (nucleoside diphosphate linked moiety X)-type motif 14 [Source:HGNC Symbol;Acc:HGNC:20141]
XLOC_027776	7:134263913-134341285	ENSSSCG00000002623|ENSSSCG00000002624|ENSSSCG00000002626	3620.11	21822.6	2.59172	0.00035	0.0217727	397682|-|100526118	F1S7D3|F1S7D2|F1S7C9	7:134289617-134312033|7:134263914-134267493|7:134316101-134325814	-|-|-	glutathione S-transferase alpha M14 [Source:RefSeq peptide;Acc:NP_999554]|-|-
XLOC_027819	7:12320216-12320483	-	6.92339	69.0581	3.31826	0.02805	0.39235	-	-	-	-	-
XLOC_027848	7:19203053-19205081	-	0.146283	0.719409	2.29805	0.04755	0.481593	-	-	-	-	-
XLOC_027854	7:19427383-19429411	-	0.146283	0.702836	2.26442	0.04765	0.481593	-	-	-	-	-
XLOC_027896	7:34340487-34340896	-	4.05298	16.3672	2.01376	0.043	0.460869	-	-	-	-	-
XLOC_027934	7:41299456-41336264	-	144.027	613.335	2.09034	0.00285	0.101905	-	-	-	-	-
XLOC_027993	7:69653542-69654180	-	2.07173	27.0642	3.70748	0.0006	0.0319925	-	-	-	-	-
XLOC_028010	7:83343663-83343932	-	0	25.9638	inf	5e-05	0.00483523	-	-	-	-	-
XLOC_028040	7:93973500-93984412	-	1.27666	9.9456	2.96168	0.0124	0.257376	-	-	-	-	-
XLOC_028047	7:97648586-97648833	-	56.1643	494.917	3.13946	0.0054	0.15525	-	-	-	-	-
XLOC_028085	7:115115005-115115271	-	0	51.904	inf	5e-05	0.00483523	-	-	-	-	-
XLOC_028087	7:117944436-117944607	-	358.754	4589.93	3.67741	0.0161	0.296818	-	-	-	-	-
XLOC_028094	7:121357503-121357736	-	0	75.4826	inf	0.00025	0.0168849	-	-	-	-	-
XLOC_028107	7:128626527-128626772	-	8.8531	69.3387	2.96941	0.0229	0.36062	-	-	-	-	-
XLOC_028110	7:129476388-129477169	-	18.0988	41.3734	1.19281	0.03115	0.408077	-	-	-	-	-
XLOC_028167	8:2813114-2853627	ENSSSCG00000008710	1.5185	5.29621	1.80232	0.02835	0.395247	100520203	F1S8L1	8:2813115-2851074	JAKMIP1	janus kinase and microtubule interacting protein 1 [Source:HGNC Symbol;Acc:HGNC:26460]
XLOC_028192	8:10245508-10376869	ENSSSCG00000008737	5.84423	17.6228	1.59236	0.00505	0.149014	100233173	F1S5E8	8:10369562-10376663	C1QTNF7	complement C1q tumor necrosis factor-related protein 7 precursor [Source:RefSeq peptide;Acc:NP_001137174]
XLOC_028249	8:33108214-33123436	ENSSSCG00000024428	0.650264	2.72752	2.06849	0.0385	0.443469	100513414	I3LPQ6	8:33109939-33123280	CHRNA9	cholinergic receptor, nicotinic, alpha 9 (neuronal) [Source:HGNC Symbol;Acc:HGNC:14079]
XLOC_028268	8:40420103-40425072	ENSSSCG00000008824	0.719549	2.61891	1.8638	0.04305	0.46094	574050	Q1PSB4,F1SE99	8:40420104-40425072	ZAR1	-
XLOC_028276	8:41755228-41760162	ENSSSCG00000027735|ENSSSCG00000030102	15.5759	1072.59	6.10564	5e-05	0.00483523	-|-	-|-	8:41758461-41758528|8:41759000-41759121	-|SNORA26	-|Small nucleolar RNA SNORA26 [Source:RFAM;Acc:RF00568]
XLOC_028327	8:57511317-57518482	ENSSSCG00000026320	0.787185	12.1144	3.94387	0.01855	0.319039	100520393	F1RTV8	8:57511318-57518482	SPINK2	serine peptidase inhibitor, Kazal type 2 (acrosin-trypsin inhibitor) [Source:HGNC Symbol;Acc:HGNC:11245]
XLOC_028498	8:110582898-110869049	ENSSSCG00000009101	1.24204	3.35384	1.4331	0.0483	0.48448	-	F1S1T2	8:110753311-110850887	PRDM5	PR domain containing 5 [Source:HGNC Symbol;Acc:HGNC:9349]
XLOC_028528	8:120497091-120554337	ENSSSCG00000009138	9.50632	22.8704	1.26652	0.01835	0.317137	100516921	F1S133,K7GPW1	8:120517217-120554337	CFI	complement factor I [Source:HGNC Symbol;Acc:HGNC:5394]
XLOC_028565	8:129326315-129336953	-	2.62262	6.60426	1.33239	0.0294	0.398398	-	-	-	-	-
XLOC_028602	8:140598847-140643559	ENSSSCG00000009222	19.9849	61.7507	1.62755	0.01325	0.266188	100037275	F1RW32	8:140599657-140643507	SPARCL1	SPARC-like 1 (hevin) [Source:HGNC Symbol;Acc:HGNC:11220]
XLOC_028725	8:19341812-19351858	ENSSSCG00000028927	0.137484	1.26302	3.19954	0.0279	0.391208	102158450	I3LK56	8:19341813-19351858	-	-
XLOC_028744	8:30936291-31054936	ENSSSCG00000022262	3.71457	78.1134	4.3943	0.0127	0.261308	-	I3LNR0	8:30951973-30959786	-	-
XLOC_028836	8:55280100-55290544	ENSSSCG00000008888	1.76307	6.71827	1.93	0.0078	0.200659	397547	O02835	8:55280140-55290347	NPY1R	neuropeptide Y receptor Y1 [Source:HGNC Symbol;Acc:HGNC:7956]
XLOC_028863	8:66707173-66709905	-	0	2.62318	inf	5e-05	0.00483523	-	-	-	-	-
XLOC_028944	8:80247107-80408329	ENSSSCG00000029200	4.94351	22.5422	2.18902	0.0148	0.281637	100627416	I3L8U3	8:80261523-80358512	-	-
XLOC_029075	8:128456773-128460982	-	0.801085	2.84557	1.82869	0.031	0.407366	-	-	-	-	-
XLOC_029148	8:1631467-1631729	-	0	62.8531	inf	5e-05	0.00483523	-	-	-	-	-
XLOC_029186	8:21281453-21281731	-	9.97339	71.61	2.84401	0.03815	0.441589	-	-	-	-	-
XLOC_029195	8:31073483-31073733	-	316.32	1975.55	2.6428	0.0005	0.0279934	-	-	-	-	-
XLOC_029196	8:31179268-31179501	-	0	51.6778	inf	0.00015	0.0115208	-	-	-	-	-
XLOC_029232	8:43608336-43608602	-	46.6419	429.622	3.20337	0.00185	0.0762766	-	-	-	-	-
XLOC_029256	8:49035936-49036206	-	0	43.1459	inf	5e-05	0.00483523	-	-	-	-	-
XLOC_029260	8:50124274-50125067	-	2.66897	12.3086	2.20531	0.0301	0.402247	-	-	-	-	-
XLOC_029332	8:78579036-78579302	-	5.85582	37.1548	2.6656	0.0235	0.364139	-	-	-	-	-
XLOC_029352	8:88353058-88353301	-	27.7285	155.661	2.48897	0.0306	0.405617	-	-	-	-	-
XLOC_029372	8:98748798-98749044	-	38.5505	207.874	2.43089	0.04895	0.485098	-	-	-	-	-
XLOC_029379	8:102191029-102191265	-	14.4096	210.223	3.86682	0.0133	0.266188	-	-	-	-	-
XLOC_029388	8:106638087-106638357	-	5.94016	67.7428	3.51149	0.033	0.415675	-	-	-	-	-
XLOC_029406	8:112359751-112360981	-	0.194478	0.98756	2.34426	0.042	0.457293	-	-	-	-	-
XLOC_029470	8:144468228-144468523	-	0	15.5777	inf	0.04155	0.457293	-	-	-	-	-
XLOC_029602	9:7527673-7553730	ENSSSCG00000014812	10.6551	30.7209	1.52768	0.01875	0.320664	396853	P79388	9:7547319-7551948	-	-
XLOC_029637	9:11249077-11459026	ENSSSCG00000028979	3.10389	20.7896	2.74371	0.0103	0.231641	-	I3L6L5	9:11252750-11456044	UVRAG	UV radiation resistance associated [Source:HGNC Symbol;Acc:HGNC:12640]
XLOC_029667	9:21817681-21826869	ENSSSCG00000014905	65.7658	182.331	1.47115	0.0251	0.372647	100626990	F1STU5	9:21817760-21825349	TMEM126B	transmembrane protein 126B [Source:HGNC Symbol;Acc:HGNC:30883]
XLOC_029669	9:22039389-22047521	ENSSSCG00000014910	974.485	4170.85	2.09763	0.029	0.397792	100519675	F2Z5Q8	9:22044873-22045202	RPL35A	ribosomal protein L35a [Source:HGNC Symbol;Acc:HGNC:10345]
XLOC_029679	9:24021896-24118187	ENSSSCG00000014924	1.48349	27.9728	4.23695	0.03155	0.409184	100522387	F1STR1	9:24081771-24116601	CTSC	cathepsin C [Source:HGNC Symbol;Acc:HGNC:2528]
XLOC_029743	9:38389398-38402406	-	7.52114	21.54	1.518	0.01005	0.229414	-	-	-	-	-
XLOC_029782	9:44982395-44985720	-	0.342774	1.75568	2.3567	0.04055	0.453814	-	-	-	-	-
XLOC_029859	9:55696085-55795884	ENSSSCG00000015144	3.06675	8.19736	1.41845	0.0143	0.276575	100512979	I3LKN9,F1S9P9	9:55749696-55793772	-	-
XLOC_029876	9:56609363-56616497	-	237.82	1032.89	2.11874	0.0024	0.0908541	-	-	-	-	-
XLOC_030032	9:84323602-84326049	ENSSSCG00000023850	4.73827	13.7458	1.53656	0.02035	0.336923	102158000	I3LTJ4	9:84323979-84325850	SDHAF3	succinate dehydrogenase complex assembly factor 3 [Source:HGNC Symbol;Acc:HGNC:21752]
XLOC_030100	9:109853609-109861980	ENSSSCG00000027203	2.95028	8.98843	1.60722	0.03215	0.4113	100624994	I3LB17	9:109853610-109861980	-	-
XLOC_030181	9:128614871-128715554	ENSSSCG00000015503	43.1261	131.207	1.60521	0.0341	0.419594	100739774	I3L904,F1S721	9:128703421-128715554	MRPS14	mitochondrial ribosomal protein S14 [Source:HGNC Symbol;Acc:HGNC:14049]
XLOC_030319	9:2617573-2642633	ENSSSCG00000030012	2.54729	7.84875	1.6235	0.01945	0.329196	-	I3LNK1	9:2617574-2642633	OLFML1	olfactomedin-like 1 [Source:HGNC Symbol;Acc:HGNC:24473]
XLOC_030397	9:5641009-5642223	ENSSSCG00000014727	33.7348	113.815	1.75439	0.0101	0.229816	100515788	F1RII5	9:5641010-5642223	-	-
XLOC_030452	9:8856430-8870894	ENSSSCG00000014827	0.478539	3.05231	2.67319	0.00685	0.182853	100513608	F1SUT1	9:8856572-8869589	PLEKHB1	pleckstrin homology domain containing, family B (evectins) member 1 [Source:HGNC Symbol;Acc:HGNC:19079]
XLOC_030455	9:9067590-9070438	ENSSSCG00000014830	10.523	33.5884	1.67442	0.00725	0.19019	100514530	F1SUS8	9:9067975-9068229	COA4	cytochrome c oxidase assembly factor 4 homolog [Source:HGNC Symbol;Acc:HGNC:24604]
XLOC_030504	9:18984367-18998367	-	1.169	2.91227	1.31686	0.02885	0.397014	-	-	-	-	-
XLOC_030518	9:22493188-22514684	ENSSSCG00000021210	45.8406	121.341	1.40437	0.0276	0.391126	-	I3LNC7	9:22493189-22501615	-	-
XLOC_030606	9:44142330-44194487	ENSSSCG00000015021	0.0631361	4.38048	6.11648	0.03695	0.433597	-	F1SUZ8	9:44142532-44165505	C11orf88	chromosome 11 open reading frame 88 [Source:HGNC Symbol;Acc:HGNC:25061]
XLOC_030669	9:51595009-51614008	ENSSSCG00000015120	1.43638	3.69755	1.36413	0.02735	0.389733	100520041	F1SAF6,I3LI16	9:51595405-51614008	USP2	ubiquitin specific peptidase 2 [Source:HGNC Symbol;Acc:HGNC:12618]
XLOC_030853	9:85968564-86007216	ENSSSCG00000021298	11.0651	66.7067	2.59182	0.00095	0.0461444	-	I3LV63	9:85968570-86007216	-	-
XLOC_030938	9:116889038-116931348	ENSSSCG00000015435	16.8636	46.0547	1.44944	0.00885	0.215428	595123	Q52I78	9:116890800-116931198	NAMPT	nicotinamide phosphoribosyltransferase [Source:HGNC Symbol;Acc:HGNC:30092]
XLOC_031171	9:21588777-21589017	-	20.1882	126.185	2.64396	0.0405	0.453814	-	-	-	-	-
XLOC_031195	9:31960223-31960781	-	1.72581	8.84799	2.35807	0.0156	0.292672	-	-	-	-	-
XLOC_031221	9:43086839-43087543	-	0.506818	4.92697	3.28116	0.025	0.372424	-	-	-	-	-
XLOC_031222	9:43137680-43138972	-	25.315	206.09	3.02521	5e-05	0.00483523	-	-	-	-	-
XLOC_031223	9:43142993-43292250	-	41.4135	269.552	2.70239	0.0052	0.151756	-	-	-	-	-
XLOC_031228	9:44957783-44959030	-	0.189237	1.31529	2.79712	0.0487	0.485062	-	-	-	-	-
XLOC_031236	9:46474136-46474571	-	0	1.39383	inf	0.0021	0.0836657	-	-	-	-	-
XLOC_031264	9:51215194-51216011	-	0.809052	9.4747	3.54978	0.00195	0.0793236	-	-	-	-	-
XLOC_031324	9:68302700-68303019	-	266.069	809.416	1.60508	0.0103	0.231641	-	-	-	-	-
XLOC_031333	9:71505998-71506271	-	201.229	1244.01	2.62809	0.0006	0.0319925	-	-	-	-	-
XLOC_031356	9:79463831-79464103	-	47.0203	283.427	2.59162	0.0148	0.281637	-	-	-	-	-
XLOC_031367	9:81752598-81752831	-	0	52.2036	inf	0.0001	0.00857863	-	-	-	-	-
XLOC_031382	9:88797283-88797545	-	26.0589	177.898	2.7712	0.0146	0.279833	-	-	-	-	-
XLOC_031400	9:105050700-105050965	-	15.1251	96.9661	2.68054	0.017	0.303673	-	-	-	-	-
XLOC_031407	9:113400553-113401191	-	2.07173	28.4381	3.77892	0.0006	0.0319925	-	-	-	-	-
XLOC_031409	9:113474432-113474791	-	0	20.9748	inf	5e-05	0.00483523	-	-	-	-	-
XLOC_031465	9:134678232-134678616	-	0.983516	13.8486	3.81564	0.0133	0.266188	-	-	-	-	-
XLOC_031466	9:134811809-134812048	-	20.8745	123.835	2.56861	0.04835	0.484703	-	-	-	-	-
XLOC_031469	9:136404421-136404577	-	0	6049.75	inf	0.0001	0.00857863	-	-	-	-	-
XLOC_031614	GL892430.1:99201-110475	ENSSSCG00000029354	11.1229	32.0197	1.52543	0.02955	0.398822	-	I3LQJ6	GL892430.1:99202-110475	-	-
XLOC_031649	GL892494.1:317-3583	ENSSSCG00000026715	31.5056	64.7196	1.0386	0.03485	0.422469	100624297	I3LA18	GL892494.1:607-3583	YPEL3	yippee-like 3 [Source:HGNC Symbol;Acc:HGNC:18327]
XLOC_031671	GL892577.1:42805-49155	ENSSSCG00000026167	44.5781	148.453	1.7356	0.01615	0.297482	-	I3LAK8	GL892577.1:42896-43048	-	-
XLOC_031727	GL892718.2:4273-4840	-	0.442834	4.90151	3.46839	0.0407	0.454775	-	-	-	-	-
XLOC_031861	GL892911.1:274558-276581	ENSSSCG00000023594	54.3125	165.523	1.60768	0.01255	0.258973	-	I3L999	GL892911.1:274866-276565	RARRES2	retinoic acid receptor responder (tazarotene induced) 2 [Source:HGNC Symbol;Acc:HGNC:9868]
XLOC_031886	GL892933.2:88267-88536	-	0	27.4125	inf	5e-05	0.00483523	-	-	-	-	-
XLOC_031909	GL892962.1:11422-12839	-	0.518261	2.19783	2.08433	0.03185	0.409184	-	-	-	-	-
XLOC_031910	GL892962.1:15127-17369	ENSSSCG00000021557	27.3704	204.774	2.90334	0.01325	0.266188	-	I3LLX8	GL892962.1:15128-17110	-	-
XLOC_031978	GL893077.1:1132-9650	ENSSSCG00000020978	5.9101	18.4864	1.64521	0.01225	0.256515	-	I3LIQ9	GL893077.1:1133-9650	-	-
XLOC_031992	GL893103.2:4343-8128	ENSSSCG00000030021	104.989	499.851	2.25127	0.0021	0.0836657	-	I3LFQ4	GL893103.2:4544-8128	-	-
XLOC_032005	GL893127.2:55924-57433	-	20.5499	67.46	1.7149	0.003	0.105846	-	-	-	-	-
XLOC_032111	GL893266.2:184154-185603	-	0.207382	0.921697	2.152	0.046	0.473923	-	-	-	-	-
XLOC_032160	GL893333.2:19453-27231	ENSSSCG00000022585	15.8641	44.6589	1.49319	0.01995	0.33263	100155802	I3L6P6	GL893333.2:19583-27231	C1orf54	chromosome 1 open reading frame 54 [Source:HGNC Symbol;Acc:HGNC:26258]
XLOC_032162	GL893333.2:37458-49909	-	66.7458	345.283	2.37103	0.0149	0.282781	-	-	-	-	-
XLOC_032193	GL893363.2:21224-24135	ENSSSCG00000030391	14.8591	30.0118	1.01418	0.04205	0.457369	-	I3LTL6	GL893363.2:22301-23663	-	-
XLOC_032215	GL893389.1:24946-47827	ENSSSCG00000028909	94.6133	290.203	1.61695	0.0096	0.223947	-	J9JIM3	GL893389.1:24948-44172	-	-
XLOC_032235	GL893411.2:926-10136	ENSSSCG00000030456	41.7838	168.331	2.01028	0.0088	0.214702	-	I3LBV4	GL893411.2:927-5997	-	-
XLOC_032236	GL893411.2:38001-95567	ENSSSCG00000027644	1.86653	10.5433	2.4979	0.0088	0.214702	-	I3LMP8	GL893411.2:38002-87349	-	-
XLOC_032240	GL893411.2:26414-27193	-	1.67972	21.649	3.68801	0.00275	0.09984	-	-	-	-	-
XLOC_032264	GL893432.2:3452-21772	ENSSSCG00000029232	8.13492	28.2519	1.79615	0.0151	0.285558	-	I3L8Y4	GL893432.2:3671-17872	-	-
XLOC_032310	GL893549.2:25813-29518	ENSSSCG00000029294	93.675	499.891	2.41588	0.02605	0.37882	-	I3LU44	GL893549.2:28571-29518	HSBP1	heat shock factor binding protein 1 [Source:HGNC Symbol;Acc:HGNC:5203]
XLOC_032372	GL893631.2:149733-149992	-	0	22.0216	inf	0.00025	0.0168849	-	-	-	-	-
XLOC_032453	GL893716.2:7550-44189	ENSSSCG00000027495	4.68975	12.06	1.36265	0.049	0.485098	-	I3LC04	GL893716.2:7551-44189	-	-
XLOC_032465	GL893735.2:55563-63065	ENSSSCG00000026881	3.0968	6.89323	1.1544	0.0333	0.41674	-	I3LH24	GL893735.2:55564-63065	-	-
XLOC_032542	GL893852.2:48964-75202	ENSSSCG00000024780|ENSSSCG00000029434	3.10925	7.54434	1.27883	0.02665	0.383353	100628150|100628055	I3LA10|I3LLN8	GL893852.2:52395-75202|GL893852.2:48965-50272	ZFAND1|SLC10A5	zinc finger, AN1-type domain 1 [Source:HGNC Symbol;Acc:HGNC:25858]|solute carrier family 10, member 5 [Source:HGNC Symbol;Acc:HGNC:22981]
XLOC_032581	GL893911.1:26741-37600	-	2.47447	6.55828	1.4062	0.0212	0.346946	-	-	-	-	-
XLOC_032869	GL894246.2:7850-18744	ENSSSCG00000000675	28.6334	77.2153	1.43119	0.0119	0.252415	445464	F1SLV6	GL894246.2:7851-18701	C1R	complement component 1, r subcomponent [Source:HGNC Symbol;Acc:HGNC:1246]
XLOC_032871	GL894246.2:47740-76238	ENSSSCG00000029400	4.96229	12.9895	1.38827	0.0415	0.457293	100270724	B9P3U4	GL894246.2:51575-56159	RBP5	retinol-binding protein 5 [Source:RefSeq peptide;Acc:NP_001138695]
XLOC_033023	GL894542.2:517-3778	-	8.62219	27.9446	1.69644	0.01175	0.250231	-	-	-	-	-
XLOC_033063	GL894597.1:12406-12735	-	2.8745	27.3331	3.24927	0.0183	0.317137	-	-	-	-	-
XLOC_033112	GL894711.1:38520-39381	-	0	1.02573	inf	5e-05	0.00483523	-	-	-	-	-
XLOC_033126	GL894750.2:241845-244119	-	3.63809	14.7142	2.01596	0.0003	0.0195183	-	-	-	-	-
XLOC_033182	GL894842.1:1062-13974	ENSSSCG00000027544	9.90219	36.6599	1.88838	0.00085	0.0423507	-	I3LCX2	GL894842.1:1103-13375	-	-
XLOC_033226	GL894935.1:10876-19551	ENSSSCG00000002900	0.121035	0.75632	2.64358	0.04645	0.476482	-	F1RM61	GL894935.1:10877-19551	PROSER3	proline and serine rich 3 [Source:HGNC Symbol;Acc:HGNC:25204]
XLOC_033335	GL895151.1:21376-21623	-	20.6073	153.446	2.89651	0.0192	0.326523	-	-	-	-	-
XLOC_033367	GL895228.2:2982-26454	ENSSSCG00000021555	5.55597	20.2856	1.86835	0.01805	0.31425	-	I3LF94,I3LJN9,I3L7V9	GL895228.2:2983-9992	-	-
XLOC_033374	GL895237.2:11216-39940	ENSSSCG00000026229	210.558	567.651	1.43079	0.0139	0.273564	-	I3LUU1	GL895237.2:11217-13749	PCBD2	pterin-4 alpha-carbinolamine dehydratase/dimerization cofactor of hepatocyte nuclear factor 1 alpha (TCF1) 2 [Source:HGNC Symbol;Acc:HGNC:24474]
XLOC_033440	GL895352.1:10694-14757	ENSSSCG00000021448	0.243449	1.40709	2.53102	0.00275	0.09984	100622440	I3LCZ1,I3LSE9,I3LL18	GL895352.1:10695-14757	CCDC17	coiled-coil domain containing 17 [Source:HGNC Symbol;Acc:HGNC:26574]
XLOC_033495	GL895503.2:31761-32662	-	2.09536	5.71135	1.44663	0.0447	0.467778	-	-	-	-	-
XLOC_033528	GL895583.1:6494-7440	-	0	0.902767	inf	0.00015	0.0115208	-	-	-	-	-
XLOC_033629	GL895912.1:1594-5570	ENSSSCG00000029067	1.97464	5.16504	1.38719	0.0464	0.476199	-	I3LMZ4,I3LHE5	GL895912.1:1927-5522	CCDC24	coiled-coil domain containing 24 [Source:HGNC Symbol;Acc:HGNC:28688]
XLOC_033731	GL896094.1:3192-7165	ENSSSCG00000023369	171.295	429.113	1.32488	0.04845	0.484703	-	I3LTI1	GL896094.1:3193-7165	MSRB1	methionine sulfoxide reductase B1 [Source:HGNC Symbol;Acc:HGNC:14133]
XLOC_033732	GL896094.1:703-2664	-	16.3564	56.9404	1.7996	0.0034	0.116481	-	-	-	-	-
XLOC_033766	GL896152.2:70861-82133	ENSSSCG00000022025	5.43139	14.2714	1.39373	0.04575	0.472491	100739313	I3LT87	GL896152.2:70991-82133	-	-
XLOC_033826	GL896204.1:72112-74185	ENSSSCG00000023849	0.804376	11.682	3.86027	0.00225	0.0873517	100621609	I3LCF8	GL896204.1:72113-74185	CTRL	chymotrypsin-like [Source:HGNC Symbol;Acc:HGNC:2524]
XLOC_033854	GL896218.1:21711-22231	-	0.937018	5.11452	2.44845	0.0397	0.450703	-	-	-	-	-
XLOC_033857	GL896218.1:25138-25539	-	17.877	579.037	5.01748	5e-05	0.00483523	-	-	-	-	-
XLOC_033858	GL896219.1:23588-29433	ENSSSCG00000026140	14.2281	32.7648	1.2034	0.036	0.429316	100623510	I3L5R6	GL896219.1:23649-28092	S100B	S100 calcium binding protein B [Source:HGNC Symbol;Acc:HGNC:10500]
XLOC_033870	GL896227.2:46621-53637	ENSSSCG00000026755	0.958312	5.23352	2.44921	0.0011	0.0520056	-	I3LNW4	GL896227.2:46622-52812	KLF15	Kruppel-like factor 15 [Source:HGNC Symbol;Acc:HGNC:14536]
XLOC_033882	GL896236.1:19318-28335	ENSSSCG00000030309	35.7962	101.4	1.50217	0.0283	0.394808	780431	I3LFI3	GL896236.1:20128-27185	NDRG2	NDRG family member 2 [Source:HGNC Symbol;Acc:HGNC:14460]
XLOC_033904	GL896254.1:6274-9269	ENSSSCG00000022187	58.8701	342.81	2.5418	5e-05	0.00483523	-	I3LIT8,I3LUF9	GL896254.1:6275-9094	CISD3	CDGSH iron sulfur domain 3 [Source:HGNC Symbol;Acc:HGNC:27578]
XLOC_033957	GL896274.2:2483-6352	-	0.765361	4.27152	2.48054	0.00715	0.188496	-	-	-	-	-
XLOC_034001	GL896299.1:4590-14729	ENSSSCG00000024383	3.11762	9.63946	1.62851	0.0341	0.419594	100626075	I3LK49	GL896299.1:4597-14729	HAUS4	HAUS augmin-like complex subunit 4 [Source:RefSeq peptide;Acc:NP_001231085]
XLOC_034002	GL896299.1:26318-35700	ENSSSCG00000029201	5.80088	14.8955	1.36053	0.04895	0.485098	-	I3L8V8	GL896299.1:26324-35700	AJUBA	ajuba LIM protein [Source:HGNC Symbol;Acc:HGNC:20250]
XLOC_034011	GL896302.1:46666-51445	ENSSSCG00000025813	1468.2	4245.39	1.53185	0.0262	0.379963	-	I3LGQ4	GL896302.1:46667-49949	-	-
XLOC_034053	GL896338.2:43697-47176	ENSSSCG00000027757	85.2024	215.666	1.33983	0.00705	0.18609	-	I3LD01	GL896338.2:43698-47176	FIS1	fission, mitochondrial 1 [Source:HGNC Symbol;Acc:HGNC:21689]
XLOC_034312	GL896571.2:115971-117626	-	3.18747	7.75356	1.28245	0.0371	0.434638	-	-	-	-	-
XLOC_034351	JH118443.1:102554-120893	ENSSSCG00000014250	8.09266	21.1119	1.38337	0.042	0.457293	100627580,100622328	F1RKL8	JH118443.1:102555-112774	-	-
XLOC_034499	JH118534.1:170215-171554	-	0.307256	2.53063	3.04199	0.02585	0.378238	-	-	-	-	-
XLOC_034531	JH118558.1:38347-38991	-	34.0543	93.8712	1.46285	0.0036	0.120047	-	-	-	-	-
XLOC_034562	JH118593.1:55519-59479	ENSSSCG00000025919	1.89946	11.9639	2.65502	0.00505	0.149014	-	I3LDR5	JH118593.1:55520-57590	-	-
XLOC_034597	JH118620.1:144705-145111	-	3.9386	21.0169	2.41579	0.0388	0.445237	-	-	-	-	-
XLOC_034621	JH118641.1:24567-27925	ENSSSCG00000010321	2.08022	5.77554	1.47322	0.04055	0.453814	-	F1S2F4,I3LPU9	JH118641.1:25839-27820	COMTD1	catechol-O-methyltransferase domain containing 1 [Source:HGNC Symbol;Acc:HGNC:26309]
XLOC_034645	JH118657.1:18693-70560	ENSSSCG00000027491	17.3002	37.0705	1.09949	0.0377	0.439248	100516527	I3LR62	JH118657.1:19223-40862	-	-
XLOC_034677	JH118688.1:6431-97893	ENSSSCG00000015347|ENSSSCG00000021680	16.5734	105.434	2.66939	0.0105	0.234897	-|-	F1SF70|I3LA26	JH118688.1:6432-14456|JH118688.1:69774-91280	-|-	-|-
XLOC_034993	JH118909.1:647-2186	-	0.683448	2.91416	2.09218	0.0358	0.428372	-	-	-	-	-
XLOC_035056	JH118955.1:95234-95828	-	0.356117	2.49527	2.80877	0.02145	0.34889	-	-	-	-	-
XLOC_035150	JH118993.1:6564-7280	-	2.43941	6.75781	1.47002	0.0462	0.475522	-	-	-	-	-
XLOC_035361	X:46875872-46881287	ENSSSCG00000012274	120.902	370.308	1.61489	0.00525	0.152796	100522775	K7GQU5,K7GLM2,F1RWV4	X:46878471-46881284	NDUFB11	NADH dehydrogenase (ubiquinone) 1 beta subcomplex, 11, 17.3kDa [Source:HGNC Symbol;Acc:HGNC:20372]
XLOC_035377	X:47813907-47837383	ENSSSCG00000024841|ENSSSCG00000028964	13.1411	89.5833	2.76915	0.0039	0.125336	100621125|-	I3LN28|I3L8X4	X:47820826-47831622|X:47814100-47819387	SLC35A2|PIM2	solute carrier family 35 (UDP-galactose transporter), member A2 [Source:HGNC Symbol;Acc:HGNC:11022]|Pim-2 proto-oncogene, serine/threonine kinase [Source:HGNC Symbol;Acc:HGNC:8987]
XLOC_035378	X:47837427-47844135	ENSSSCG00000022647	17.4062	37.8691	1.12142	0.03455	0.421958	100621014	I3LVJ9	X:47837428-47843547	TIMM17B	translocase of inner mitochondrial membrane 17 homolog B (yeast) [Source:HGNC Symbol;Acc:HGNC:17310]
XLOC_035478	X:65779490-65791734	ENSSSCG00000023312	17.7457	41.2419	1.21664	0.02375	0.366146	100524473	I3LBW5	X:65779491-65791734	PIN4	peptidylprolyl cis/trans isomerase, NIMA-interacting 4 [Source:HGNC Symbol;Acc:HGNC:8992]
XLOC_035591	X:99134514-99153741	-	93.9957	301.12	1.67967	0.00595	0.165689	-	-	-	-	-
XLOC_035616	X:104266401-104398299	ENSSSCG00000012576	5.55053	14.7898	1.41391	0.0144	0.276998	100521058	K7GL19,K7GPS4,I3LIU5,K7GRE3,F1RXG9	X:104266414-104398296	CHRDL1	chordin-like 1 [Source:HGNC Symbol;Acc:HGNC:29861]
XLOC_035722	X:126904913-126910263	-	26.3122	170.848	2.69891	0.00015	0.0115208	-	-	-	-	-
XLOC_035732	X:127939514-127951281	-	37.1622	314.399	3.08069	0.0313	0.408183	-	-	-	-	-
XLOC_035782	X:141414893-141458759	ENSSSCG00000012759	0.597018	3.00757	2.33275	0.015	0.284172	-	F1S2C9	X:141414894-141458759	-	-
XLOC_035787	X:141779260-141791213	ENSSSCG00000012768	1.06891	3.25822	1.60794	0.01895	0.323564	-	F1S2B4	X:141779330-141787155	ZFP92	ZFP92 zinc finger protein [Source:HGNC Symbol;Acc:HGNC:12865]
XLOC_035791	X:141968217-141977757	ENSSSCG00000012774	0.168098	0.884276	2.3952	0.01055	0.235521	-	-	X:141968377-141977757	DUSP9	-
XLOC_035825	X:143582550-143583860	ENSSSCG00000025528	83.9399	211.405	1.33258	0.0384	0.443277	-	I3LJP0	X:143582551-143583860	-	-
XLOC_035852	X:12761109-12788708	ENSSSCG00000012132	10.9882	34.2181	1.6388	0.0287	0.395974	100158057	K7GN41,F1SQU7,K7GNQ9,K7GRT0,K7GKA0	X:12761112-12788609	ASB9	ankyrin repeat and SOCS box containing 9 [Source:HGNC Symbol;Acc:HGNC:17184]
XLOC_035855	X:12853826-12994334	ENSSSCG00000012136	7.78643	22.0528	1.50193	0.01685	0.302773	100514999	K7GMK3,K7GKZ3,K7GMY9,F1SQU3,K7GKW6	X:12894760-12994334	PIR	pirin (iron-binding nuclear protein) [Source:HGNC Symbol;Acc:HGNC:30048]
XLOC_035866	X:15343431-15558254	ENSSSCG00000012153	5.39896	14.2152	1.39669	0.01405	0.273731	100154649	K7GL62,F1SQQ4	X:15343815-15373512	RAI2	retinoic acid induced 2 [Source:HGNC Symbol;Acc:HGNC:9835]
XLOC_035886	X:21323358-21442127	ENSSSCG00000012174	19.4214	70.08	1.85136	0.0088	0.214702	100525438	K7GPW3,F1SPZ9	X:21323359-21442127	APOO	apolipoprotein O [Source:HGNC Symbol;Acc:HGNC:28727]
XLOC_035905	X:28384121-28389200	ENSSSCG00000012199	0.44783	2.49114	2.47578	0.01755	0.308831	397680	F1SPV3	X:28384122-28389200	NR0B1	-
XLOC_035974	X:46623206-46626302	-	32.6391	83.0211	1.34688	0.01525	0.287883	-	-	-	-	-
XLOC_035988	X:47547720-47558697	ENSSSCG00000025981	2.75443	8.57883	1.63903	0.01355	0.269165	100627516	I3LQM7	X:47547721-47558697	SLC38A5	solute carrier family 38, member 5 [Source:HGNC Symbol;Acc:HGNC:18070]
XLOC_035989	X:47619463-47627444	ENSSSCG00000020738	71.5213	172.347	1.26887	0.03825	0.442266	100312968	D0G6S5	X:47619464-47627444	EBP	emopamil binding protein (sterol isomerase) [Source:HGNC Symbol;Acc:HGNC:3133]
XLOC_036046	X:54154919-54165935	ENSSSCG00000029800	23.7146	62.6494	1.40153	0.0047	0.141833	100522720	I3LGG1	X:54154920-54165935	-	-
XLOC_036048	X:54490993-54501938	ENSSSCG00000027095	25.7327	67.3574	1.38824	0.0053	0.153203	100620759	I3LGG1	X:54490994-54501938	-	-
XLOC_036092	X:65888884-65894578	ENSSSCG00000012409	48.5005	261.288	2.42957	0.02535	0.374009	654297	Q2VIU2	X:65888885-65894578	CITED1	Cbp/p300-interacting transactivator, with Glu/Asp-rich carboxy-terminal domain, 1 [Source:HGNC Symbol;Acc:HGNC:1986]
XLOC_036195	X:98862299-98881529	-	91.742	300.616	1.71227	0.00575	0.162028	-	-	-	-	-
XLOC_036253	X:113359327-113376780	ENSSSCG00000012614	0.312911	14.715	5.55539	0.00105	0.0498633	-	-	X:113359532-113372938	CH242-272B23.4	-
XLOC_036362	X:141372851-141376620	ENSSSCG00000012757	103.656	394.362	1.92771	0.00165	0.0709167	606742	K7GP26,K7GPA3,F2Z563,K7GR44	X:141372859-141376620	CETN2	centrin, EF-hand protein, 2 [Source:HGNC Symbol;Acc:HGNC:1867]
XLOC_036367	X:141924435-141933321	ENSSSCG00000012770	12.0951	25.3309	1.06648	0.04265	0.458346	100520599	K7GPV9,K7GPI9,F1S2B1,K7GNA8,K7GQF0,K7GQ49,K7GNH5	X:141924441-141933321	FAM58A	family with sequence similarity 58, member A [Source:HGNC Symbol;Acc:HGNC:28434]
XLOC_036368	X:141989364-141993498	ENSSSCG00000012773	3.52817	13.7379	1.96117	0.00375	0.122552	100337678	K7GPU6,K7GMB1,K7GLS9,F1S2A7,K7GNK5,K7GQU2,K7GQN8	X:141989366-141993498	PNCK	pregnancy up-regulated nonubiquitous CaM kinase [Source:HGNC Symbol;Acc:HGNC:13415]
XLOC_036410	X:10819642-10820219	-	2.85139	27.5239	3.27095	0.0042	0.131598	-	-	-	-	-
XLOC_036497	X:58044108-58044461	-	1.29229	18.8415	3.86591	0.03555	0.426939	-	-	-	-	-
XLOC_036545	X:75797901-75798134	-	0	99.2765	inf	0.0489	0.485098	-	-	-	-	-
XLOC_036546	X:76052300-76052537	-	0	117.174	inf	5e-05	0.00483523	-	-	-	-	-
XLOC_036575	X:98071636-98071925	-	60.6685	378.746	2.64221	0.0167	0.302253	-	-	-	-	-
XLOC_036626	X:132252456-132252708	-	0	32.0374	inf	0.0001	0.00857863	-	-	-	-	-
XLOC_036635	X:141562065-141565058	-	0.103443	0.943362	3.18898	0.0129	0.263133	-	-	-	-	-
XLOC_036638	X:141577461-141579037	-	0.10484	0.796661	2.92578	0.03855	0.443565	-	-	-	-	-
XLOC_000027	1:9093102-9101655	ENSSSCG00000004043	3.60302	0.475979	-2.92024	0.0287	0.395974	-	F6Q1A4	1:9093103-9101655	-	-
XLOC_000033	1:10042141-10052624	ENSSSCG00000004053	1.26495	0.323234	-1.96842	0.01135	0.246148	100155114	F1SB58	1:10042142-10052624	TAGAP	t-cell activation Rho GTPase-activating protein [Source:RefSeq peptide;Acc:NP_001230472]
XLOC_000050	1:13757294-13894917	ENSSSCG00000026474	1.4321	0.351491	-2.02657	0.04655	0.476589	102161649	I3LFX3	1:13879769-13894917	-	-
XLOC_000065	1:18198188-18223391	ENSSSCG00000004096|ENSSSCG00000004098	2.44127	0.606473	-2.00912	0.0139	0.273564	100521647|-	F1S7V3|F1S7V1	1:18220581-18223391|1:18199792-18201279	-|-	-|-
XLOC_000114	1:33247683-33256212	ENSSSCG00000021443	30.4587	11.046	-1.46333	0.0044	0.13547	100625739	I3LS78	1:33250475-33256209	SGK1	serum/glucocorticoid regulated kinase 1 [Source:HGNC Symbol;Acc:HGNC:10810]
XLOC_000132	1:34985293-34987059	-	11.3007	0	-inf	5e-05	0.00483523	-	-	-	-	-
XLOC_000135	1:35343112-35467182	ENSSSCG00000023773	225.362	1.29874	-7.43899	0.00035	0.0217727	106504070	F1S3N2,K7GMC1,K7GSL9	1:35463102-35466461	ARG1	-
XLOC_000153	1:41897711-41900629	-	2.75177	0.456563	-2.59147	0.0267	0.383813	-	-	-	-	-
XLOC_000164	1:45161640-45166060	-	0.752642	0.0742525	-3.34145	0.02345	0.364139	-	-	-	-	-
XLOC_000168	1:48197139-48263826	ENSSSCG00000004245	0.81524	0.185564	-2.13531	0.0308	0.406243	100626155	F1SF39	1:48197140-48263560	FAM184A	family with sequence similarity 184, member A [Source:HGNC Symbol;Acc:HGNC:20991]
XLOC_000217	1:64482242-64542432	ENSSSCG00000004322	3.05387	1.00868	-1.59817	0.03275	0.414243	102167335	I3LFT8,F1S0C5	1:64482243-64542250	ANKRD6	ankyrin repeat domain 6 [Source:HGNC Symbol;Acc:HGNC:17280]
XLOC_000242	1:81577473-81601278	ENSSSCG00000004369	4.25221	0.515689	-3.04364	0.008	0.203832	100154284	F1RYP9	1:81577474-81601278	-	-
XLOC_000246	1:82267596-82273307	ENSSSCG00000031023	257.482	17.4039	-3.88699	0.00035	0.0217727	-	K7GMK8	1:82268709-82273291	CD24	CD24 molecule [Source:HGNC Symbol;Acc:HGNC:1645]
XLOC_000288	1:95094225-95111380	ENSSSCG00000004464	17.6128	3.69654	-2.25238	0.00515	0.15071	-	F1RQL4	1:95104353-95109056	FAM46A	family with sequence similarity 46, member A [Source:HGNC Symbol;Acc:HGNC:18345]
XLOC_000339	1:116786055-116917894	ENSSSCG00000004538	1.02694	0.28611	-1.84371	0.0484	0.484703	100512572	F1S1X8	1:116786056-116917894	WDR7	WD repeat domain 7 [Source:HGNC Symbol;Acc:HGNC:13490]
XLOC_000355	1:119218353-119263273	-	1.08477	0.164844	-2.71821	0.00895	0.216869	-	-	-	-	-
XLOC_000417	1:133903978-133936877	ENSSSCG00000030168	18.1204	0.449074	-5.33452	0.001	0.0482426	-	I3LPP5,I3LP12	1:133903979-133936093	CYP19A1	cytochrome P450, family 19, subfamily A, polypeptide 1 [Source:HGNC Symbol;Acc:HGNC:2594]
XLOC_000418	1:133945699-134020525	-	0.92314	0.0488336	-4.2406	0.03655	0.431154	-	-	-	-	-
XLOC_000419	1:134045201-134054805	-	3.35393	0.265271	-3.66031	0.004	0.126637	-	-	-	-	-
XLOC_000426	1:134969504-134973439	-	35.8089	3.85626	-3.21505	0.00045	0.025875	-	-	-	-	-
XLOC_000428	1:135147861-135168674	ENSSSCG00000004644	24.9276	2.74977	-3.18036	0.0255	0.375182	100156724	F1SQH5	1:135147967-135166937	HDC	histidine decarboxylase [Source:HGNC Symbol;Acc:HGNC:4855]
XLOC_000440	1:137027941-137303566	ENSSSCG00000004658	7.07534	1.01162	-2.80613	0.00045	0.025875	-	F1SN67	1:137103320-137303566	FBN1	fibrillin 1 [Source:HGNC Symbol;Acc:HGNC:3603]
XLOC_000543	1:152741328-152749491	ENSSSCG00000004808	3.86536	0.0681614	-5.8255	0.04285	0.459493	100156280	F2Z5T1	1:152745851-152746405	GREM1	gremlin 1, DAN family BMP antagonist [Source:HGNC Symbol;Acc:HGNC:2001]
XLOC_000609	1:175451589-175466736	-	0.712964	0	-inf	5e-05	0.00483523	-	-	-	-	-
XLOC_000610	1:175502732-175517283	ENSSSCG00000004890	167.724	0.554517	-8.24065	5e-05	0.00483523	100519286	F1SMW7	1:175502733-175517283	SERPINB2	serpin peptidase inhibitor, clade B (ovalbumin), member 2 [Source:HGNC Symbol;Acc:HGNC:8584]
XLOC_000630	1:179772066-179891991	ENSSSCG00000004918	2.18971	0.350301	-2.64407	0.01325	0.266188	100152584	F1SM39	1:179772067-179891302	ALPK2	alpha-kinase 2 [Source:HGNC Symbol;Acc:HGNC:20565]
XLOC_000659	1:184978720-185092473	ENSSSCG00000026078	5.63294	2.50682	-1.16803	0.029	0.397792	100154444	F1SIU0	1:184978721-185092440	GLCE	glucuronic acid epimerase [Source:HGNC Symbol;Acc:HGNC:17855]
XLOC_000710	1:202226397-202238152	ENSSSCG00000005031	2.90249	0.177785	-4.02908	0.02995	0.401251	100524418	F1SFF2	1:202228111-202235815	PTGDR	prostaglandin D2 receptor (DP) [Source:HGNC Symbol;Acc:HGNC:9591]
XLOC_000711	1:202267285-202282616	ENSSSCG00000021862	1.86376	0.568504	-1.71298	0.0287	0.395974	100127164	F1SFF0	1:202267525-202280375	PTGER2	prostaglandin E receptor 2 (subtype EP2), 53kDa [Source:HGNC Symbol;Acc:HGNC:9594]
XLOC_000720	1:204365756-204373334	ENSSSCG00000005048	18.2432	8.26367	-1.1425	0.02905	0.397881	-	F1SFD6	1:204365757-204371369	-	-
XLOC_000753	1:211934968-211959675	-	7.58997	1.54421	-2.29723	0.01545	0.29037	-	-	-	-	-
XLOC_000754	1:212130285-212181111	ENSSSCG00000005096	48.6728	15.5539	-1.64584	0.02095	0.343913	396696	F1SRU5	1:212130958-212179888	HIF1A	-
XLOC_000761	1:212928693-213258768	ENSSSCG00000005106	4.60087	1.27153	-1.85535	0.0265	0.382488	-	F1SRS9	1:212938361-213258768	NTRK3	neurotrophic tyrosine kinase, receptor, type 3 [Source:HGNC Symbol;Acc:HGNC:8033]
XLOC_000828	1:227333392-227357125	ENSSSCG00000005171	104.258	29.9337	-1.80031	0.0094	0.220978	397402	D0G0B6	1:227334093-227344720	-	-
XLOC_000849	1:241060723-241116231	ENSSSCG00000005199	2.08317	0.411844	-2.33861	0.0222	0.355919	-	F1SMN8	1:241060724-241084165	GLDC	glycine dehydrogenase (decarboxylating) [Source:HGNC Symbol;Acc:HGNC:4313]
XLOC_000855	1:242497238-242503501	ENSSSCG00000005216	8922.02	739.815	-3.59213	0.0443	0.465653	396891	J9JIL0	1:242497239-242503501	-	-
XLOC_000862	1:243421598-243557541	ENSSSCG00000030006	1.74505	0.202569	-3.10679	0.03835	0.44294	-	I3LKE1	1:243436040-243436513	-	-
XLOC_000863	1:243871197-243981112	ENSSSCG00000005224	1.71159	0.459226	-1.89806	0.0081	0.205152	-	F1SK39,F1SK38	1:243871198-243976749	GLIS3	GLIS family zinc finger 3 [Source:HGNC Symbol;Acc:HGNC:28510]
XLOC_000893	1:251502826-251508734	-	1.95884	0.34615	-2.50053	0.03535	0.426344	-	-	-	-	-
XLOC_000899	1:252778629-252808540	ENSSSCG00000028996	18.1993	2.50596	-2.86045	0.00085	0.0423507	-	I3LRS5	1:252793170-252808540	ALDH1A1	aldehyde dehydrogenase 1 family, member A1 [Source:HGNC Symbol;Acc:HGNC:402]
XLOC_000907	1:256219511-256296319	ENSSSCG00000005277	28.7301	3.0097	-3.25487	5e-05	0.00483523	100157004	F1SIN0	1:256219662-256220948	GCNT1	glucosaminyl (N-acetyl) transferase 1, core 2 [Source:HGNC Symbol;Acc:HGNC:4203]
XLOC_000923	1:263539166-263547141	ENSSSCG00000025750	19.1663	9.4805	-1.01554	0.0485	0.484703	-	I3L8Y2	1:263540243-263544688	-	-
XLOC_000961	1:267426797-267452812	-	1.05	0.221119	-2.24749	0.0378	0.439552	-	-	-	-	-
XLOC_000972	1:269048170-269080656	ENSSSCG00000005380	15.3407	2.67693	-2.51871	0.0001	0.00857863	-	F1SSE8	1:269048171-269072184	-	-
XLOC_000973	1:269089547-269149600	ENSSSCG00000005382	10.7731	4.3131	-1.32063	0.0087	0.214466	396665,100738857	K7GS16,Q19ML6,K7GMW5,Q19ML3,Q19ML7	1:269089548-269149052	TGFBR1	-
XLOC_000980	1:270575097-270678479	ENSSSCG00000005391	10.3603	1.40991	-2.87739	0.0093	0.220086	102166244	F1SSC8	1:270575098-270669977	-	-
XLOC_001032	1:284642496-284648435	ENSSSCG00000028992	33.6481	7.71675	-2.12446	0.0012	0.0555	100622399	I3LR16	1:284642844-284644552	-	-
XLOC_001034	1:284727386-284753097	ENSSSCG00000029221	17.9761	3.00384	-2.5812	0.0045	0.13716	397186	I3LH68	1:284727821-284751025	-	-
XLOC_001037	1:284871910-284991153	ENSSSCG00000005480	6.35838	2.2934	-1.47117	0.01495	0.283477	-	F1SN86	1:284871911-284991153	-	-
XLOC_001051	1:289775821-289785847	ENSSSCG00000005503	15.2855	2.15286	-2.82784	0.0004	0.0238375	399541	F1SMI0,K7GT18,K7GLZ3,K7GP10,K7GMK9	1:289775822-289785847	TLR4	Sus scrofa toll-like receptor 4 (TLR4), transcript variant 2, mRNA. [Source:RefSeq mRNA;Acc:NM_001293316]
XLOC_001106	1:299402146-299438941	ENSSSCG00000005593	5.25636	1.97145	-1.41481	0.0367	0.432093	100154062	F1SKR6	1:299402516-299429476	OLFML2A	Olfactomedin-like protein 2A [Source:UniProtKB/Swiss-Prot;Acc:A2BD09]
XLOC_001122	1:302023311-302098203	ENSSSCG00000005617	12.3514	4.27195	-1.5317	0.0216	0.349992	100517927	F1RS11	1:302057983-302090174	STXBP1	syntaxin binding protein 1 [Source:HGNC Symbol;Acc:HGNC:11444]
XLOC_001150	1:303720887-303771091	ENSSSCG00000005680	21.9941	9.05405	-1.28048	0.0392	0.448135	-	F1RQG1	1:303720888-303770893	PRRX2	paired related homeobox 2 [Source:HGNC Symbol;Acc:HGNC:21338]
XLOC_001190	1:308316068-308353293	ENSSSCG00000029715	4.14922	1.34879	-1.62117	0.0246	0.369869	100620523	I3LHF9,I3LLD2	1:308316069-308353293	OLFM1	olfactomedin 1 [Source:HGNC Symbol;Acc:HGNC:17187]
XLOC_001282	1:8739980-8885504	ENSSSCG00000004039	4.99395	1.13054	-2.14318	0.00875	0.214466	100142677	F1SB80	1:8788104-8885504	SLC22A3	solute carrier family 22 (organic cation transporter), member 3 [Source:HGNC Symbol;Acc:HGNC:10967]
XLOC_001285	1:9166934-9271471	ENSSSCG00000004044	13.2171	3.10202	-2.09113	0.00305	0.106901	397214	F1SB67	1:9166935-9271240	IGF2R	-
XLOC_001294	1:10219963-10254185	-	36.7283	17.4361	-1.07481	0.03565	0.427298	-	-	-	-	-
XLOC_001342	1:23479303-23510624	ENSSSCG00000004125	12.4863	4.12982	-1.5962	0.0152	0.287194	100152253	F1S731	1:23480022-23510485	STX11	syntaxin 11 [Source:HGNC Symbol;Acc:HGNC:11429]
XLOC_001385	1:35133812-35137286	ENSSSCG00000004192	224.793	45.5171	-2.30412	0.00045	0.025875	100152141	F1S3P6	1:35133813-35137139	CTGF	-
XLOC_001386	1:35240341-35281384	ENSSSCG00000004193	6.24843	2.39421	-1.38394	0.04395	0.46473	100037271	F1S3P5	1:35243792-35281384	ENPP1	ectonucleotide pyrophosphatase/phosphodiesterase 1 [Source:HGNC Symbol;Acc:HGNC:3356]
XLOC_001392	1:35580249-35649545	ENSSSCG00000004195	313.761	1.57246	-7.6405	0.0007	0.0363232	397115	Q95JC8	1:35580461-35594611	-	Arginase-1 [Source:UniProtKB/Swiss-Prot;Acc:Q95JC8]
XLOC_001405	1:39635284-39788180	ENSSSCG00000004218	16.733	6.65973	-1.32916	0.04495	0.46924	-	F1S2X1	1:39635369-39787134	RSPO3	R-spondin 3 [Source:HGNC Symbol;Acc:HGNC:20866]
XLOC_001410	1:40989150-41001893	ENSSSCG00000004223	7.62262	2.07796	-1.87512	0.0018	0.0750882	100152404	F1S2V4	1:40989586-41000919	HEY2	hes-related family bHLH transcription factor with YRPW motif 2 [Source:HGNC Symbol;Acc:HGNC:4881]
XLOC_001412	1:41672341-41860064	ENSSSCG00000021149	1.8957	0.263025	-2.84946	0.002	0.0808935	-	I3L9T0	1:41673748-41860064	RNF217	ring finger protein 217 [Source:HGNC Symbol;Acc:HGNC:21487]
XLOC_001418	1:44076442-44094651	ENSSSCG00000004233	9.57073	2.68277	-1.8349	0.00945	0.221419	100153442,100736941	K7GNV4,K7GSA9,F1S2T7,K7GMT9	1:44076443-44094651	SMPDL3A	-
XLOC_001493	1:65442387-65452145	-	1.12466	0	-inf	5e-05	0.00483523	-	-	-	-	-
XLOC_001578	1:92966182-92986471	ENSSSCG00000004452	18.342	0.884543	-4.37408	5e-05	0.00483523	100156168	F1RQM7	1:92967487-92968731	PRSS35	protease, serine, 35 [Source:HGNC Symbol;Acc:HGNC:21387]
XLOC_001589	1:97113313-97179971	ENSSSCG00000004468	20.8583	4.10454	-2.34533	0.03955	0.44972	-	I3LII5,F1RQL0	1:97174854-97176328	SH3BGRL2	SH3 domain binding glutamate-rich protein like 2 [Source:HGNC Symbol;Acc:HGNC:15567]
XLOC_001618	1:108087676-108118279	ENSSSCG00000004507	6.0596	2.45034	-1.30624	0.03275	0.414243	100521305	F1CK19	1:108087684-108117509	SMAD7	SMAD family member 7 [Source:HGNC Symbol;Acc:HGNC:6773]
XLOC_001649	1:118015932-118027899	ENSSSCG00000004547	8.9571	2.62908	-1.76847	0.0015	0.0663462	-	F1S0B4	1:118018185-118027873	-	-
XLOC_001675	1:123542739-123548001	-	2.44159	0	-inf	5e-05	0.00483523	-	-	-	-	-
XLOC_001681	1:124546381-124676269	ENSSSCG00000004586	1.0102	0.277541	-1.86387	0.01705	0.304311	100156658	F1S058	1:124546382-124619000	FAM81A	family with sequence similarity 81, member A [Source:HGNC Symbol;Acc:HGNC:28379]
XLOC_001717	1:134116633-134161917	ENSSSCG00000004633	51.3496	10.3132	-2.31586	0.00385	0.124292	-	F1RYN1	1:134119715-134120323	TNFAIP8L3	tumor necrosis factor, alpha-induced protein 8-like 3 [Source:HGNC Symbol;Acc:HGNC:20620]
XLOC_001725	1:134945547-134954225	-	5.68023	0.582243	-3.28626	0.011	0.241014	-	-	-	-	-
XLOC_001777	1:144621555-144641473	ENSSSCG00000020666	9.49897	4.50342	-1.07675	0.03925	0.448225	100738234	I3LDA5	1:144621556-144641473	EHD4	EH-domain containing 4 [Source:HGNC Symbol;Acc:HGNC:3245]
XLOC_001804	1:146283054-146302583	ENSSSCG00000004779	0.986279	0.0957446	-3.36473	0.0056	0.159065	-	F1SS34	1:146283055-146302583	PLCB2	phospholipase C, beta 2 [Source:HGNC Symbol;Acc:HGNC:9055]
XLOC_001843	1:155959953-156033821	ENSSSCG00000004825	11.7563	4.98278	-1.23842	0.0144	0.276998	100520288	F1SR91	1:155959954-156033821	CHSY1	chondroitin sulfate synthase 1 precursor [Source:RefSeq peptide;Acc:NP_001231371]
XLOC_001865	1:159396561-159485685	ENSSSCG00000026006	5.55288	1.9711	-1.49424	0.0099	0.228193	494563	C7EMF3	1:159396562-159485685	KLF13	-
XLOC_001896	1:175328929-175354354	ENSSSCG00000004889	4.5002	0.76015	-2.56563	0.0216	0.349992	100154994	F1SMW8	1:175328930-175354354	SERPINB10	-
XLOC_001906	1:178852056-178857428	ENSSSCG00000026454	8.06964	1.43552	-2.49093	0.00355	0.118939	-	F1SMU1	1:178852779-178857414	PMAIP1	phorbol-12-myristate-13-acetate-induced protein 1 [Source:HGNC Symbol;Acc:HGNC:9108]
XLOC_001945	1:183958750-184073070	ENSSSCG00000004961	7.47864	2.46894	-1.59889	0.00465	0.140924	100520350	F1SJH1	1:183958757-184072818	ITGA11	integrin, alpha 11 [Source:HGNC Symbol;Acc:HGNC:6136]
XLOC_001951	1:185892462-185940675	ENSSSCG00000004972	8.35625	3.04852	-1.45475	0.04185	0.457293	-	F1SIT5	1:185896830-185920615	-	-
XLOC_001978	1:197851663-197937557	-	0.741533	0.0977694	-2.92306	0.0383	0.442603	-	-	-	-	-
XLOC_001997	1:201010465-201116900	ENSSSCG00000005025	2.21026	0.248295	-3.15409	0.0007	0.0363232	100153738	I3LLR6,F1SFF7	1:201010807-201116301	TRIM9	tripartite motif containing 9 [Source:HGNC Symbol;Acc:HGNC:16288]
XLOC_002007	1:203773958-203781705	ENSSSCG00000005045	16.6372	6.92417	-1.2647	0.01725	0.306339	100113425	A7LJT9	1:203773959-203776407	BMP4	bone morphogenetic protein 4 [Source:HGNC Symbol;Acc:HGNC:1071]
XLOC_002008	1:203841043-203848659	-	13.906	5.30537	-1.39018	0.0261	0.379029	-	-	-	-	-
XLOC_002095	1:228802213-229005217	ENSSSCG00000005177	6.32205	1.22076	-2.37262	0.0005	0.0279934	-	F1SNE5	1:228802214-229005163	SH3GL2	SH3-domain GRB2-like 2 [Source:HGNC Symbol;Acc:HGNC:10831]
XLOC_002115	1:241128042-241129201	ENSSSCG00000023898	2.40108	0.308431	-2.96066	0.03695	0.433597	102166770	I3LUL7	1:241128043-241129201	-	-
XLOC_002127	1:242696462-242837967	ENSSSCG00000005215	7.34247	1.93932	-1.92071	0.0052	0.151756	397201	J9JIK9,K7GRY2,K7GMY7,K7GML7	1:242696463-242786177	JAK2	tyrosine-protein kinase JAK2 [Source:RefSeq peptide;Acc:NP_999278]
XLOC_002132	1:243229380-243270334	ENSSSCG00000005222	1.69248	0.155817	-3.44121	0.00485	0.145125	397003	F1SK41	1:243229381-243270334	SLC1A1	excitatory amino acid transporter 3 [Source:RefSeq peptide;Acc:NP_001158121]
XLOC_002151	1:250295768-250587110	ENSSSCG00000005257	0.943541	0.185735	-2.34484	0.03545	0.426583	-	F1SJC7	1:250301455-250587110	TRPM3	transient receptor potential cation channel, subfamily M, member 3 [Source:HGNC Symbol;Acc:HGNC:17992]
XLOC_002153	1:251231326-251461842	ENSSSCG00000024257	13.9919	2.04061	-2.77752	5e-05	0.00483523	100516588	I3LK96	1:251419444-251461842	-	-
XLOC_002154	1:251231326-251461842	ENSSSCG00000027780	2.39629	0	-inf	0.04015	0.452672	-	-	1:251308826-251308915	-	-
XLOC_002167	1:257106232-257310461	ENSSSCG00000005284	26.3765	4.11336	-2.68086	0.00045	0.025875	100048958	A4L2Z4	1:257106371-257310461	GNA14	guanine nucleotide binding protein (G protein), alpha 14 [Source:HGNC Symbol;Acc:HGNC:4382]
XLOC_002216	1:268172255-268218259	ENSSSCG00000005376	2.52095	0.531577	-2.24562	0.00515	0.15071	100512084	F1SSG2	1:268175610-268218193	TBC1D2	TBC1 domain family, member 2 [Source:HGNC Symbol;Acc:HGNC:18026]
XLOC_002220	1:268964059-268973843	ENSSSCG00000029421	8.56764	1.4598	-2.55313	0.01725	0.306339	102164134	I3LN25	1:268964060-268973843	-	-
XLOC_002221	1:268998510-269007038	ENSSSCG00000027204	16.7088	2.12749	-2.97338	0.00875	0.214466	102164256	I3LNY7	1:269000348-269007038	-	-
XLOC_002228	1:270817986-270823866	ENSSSCG00000005392	6.05509	2.46236	-1.2981	0.03675	0.432204	100620844	F1SSC7	1:270818334-270818768	MURC	muscle-related coiled-coil protein [Source:HGNC Symbol;Acc:HGNC:33742]
XLOC_002264	1:282114911-282319323	ENSSSCG00000005455	10.6777	4.28597	-1.31691	0.0479	0.482334	100155613	F1SND0	1:282120743-282317913	SVEP1	sushi, von Willebrand factor type A, EGF and pentraxin domain containing 1 [Source:HGNC Symbol;Acc:HGNC:15985]
XLOC_002275	1:283755683-283878571	ENSSSCG00000005466	6.94068	3.1636	-1.13351	0.03545	0.426583	768100	Q06A95	1:283777345-283841882	PTBP3	polypyrimidine tract binding protein 3 [Source:HGNC Symbol;Acc:HGNC:10253]
XLOC_002305	1:286544942-286571421	ENSSSCG00000026633	0.719038	0.0677835	-3.40706	0.00965	0.224621	574055	Q4QTJ9	1:286544943-286571421	TNFSF8	-
XLOC_002306	1:286604310-286814277	ENSSSCG00000005494|ENSSSCG00000026492	145.84	4.73769	-4.94406	5e-05	0.00483523	-|-	I3LJU9,I3LDR6,F1SMI5|F1SMI6	1:286732772-286813962|1:286604311-286608866	-|-	-|-
XLOC_002307	1:286869324-286974241	-	328.289	6.72245	-5.60984	0.0004	0.0238375	-	-	-	-	-
XLOC_002364	1:298098084-298440570	ENSSSCG00000026555	5.21528	1.6011	-1.70368	0.03745	0.437397	-	F1SKT2	1:298098085-298440570	DENND1A	DENN/MADD domain containing 1A [Source:HGNC Symbol;Acc:HGNC:29324]
XLOC_002373	1:299754094-299758545	ENSSSCG00000005601	140.533	63.3091	-1.15043	0.04855	0.484703	407060	F1RS36	1:299754095-299758545	HSPA5	heat shock 70kDa protein 5 (glucose-regulated protein, 78kDa) [Source:HGNC Symbol;Acc:HGNC:5238]
XLOC_002428	1:305269555-305286033	ENSSSCG00000028172	1.70697	0.581457	-1.5537	0.04105	0.455814	100624292	I3LA76	1:305269556-305284180	FAM78A	family with sequence similarity 78, member A [Source:HGNC Symbol;Acc:HGNC:25465]
XLOC_002454	1:307780256-307851628	ENSSSCG00000005750	21.6108	6.46386	-1.74129	0.0049	0.146005	100737434	F1S022	1:307780257-307851628	-	-
XLOC_002455	1:308216806-308224093	ENSSSCG00000029414	19.6652	1.06869	-4.20174	0.00025	0.0168849	397316	I3LGI8	1:308216807-308223959	-	-
XLOC_002470	1:311243220-311347236	ENSSSCG00000022203	5.30004	0.433074	-3.61332	0.00225	0.0873517	-	I3L8I1	1:311252851-311259939	PCSK6	proprotein convertase subtilisin/kexin type 6 [Source:HGNC Symbol;Acc:HGNC:8569]
XLOC_002472	1:311421647-311434587	ENSSSCG00000005785	2.73695	0.558143	-2.29387	0.04375	0.463767	-	F1RZ92	1:311422002-311434587	-	-
XLOC_002473	1:311460403-311466667	ENSSSCG00000005784	14.6934	2.57419	-2.51298	5e-05	0.00483523	-	F1RZ93	1:311461749-311466667	-	-
XLOC_002475	1:311655305-311661976	-	14.656	2.37934	-2.62285	0.00015	0.0115208	-	-	-	-	-
XLOC_002561	1:22389629-22389872	-	183.279	17.0846	-3.42327	0.01735	0.307858	-	-	-	-	-
XLOC_002609	1:41635467-41640652	-	5.19927	2.38422	-1.12479	0.0234	0.363914	-	-	-	-	-
XLOC_002703	1:98172667-98172930	-	89.9341	17.3115	-2.37714	0.04475	0.468071	-	-	-	-	-
XLOC_002800	1:135285778-135286002	-	185.602	0	-inf	5e-05	0.00483523	-	-	-	-	-
XLOC_002854	1:155340047-155348321	-	131.675	0	-inf	5e-05	0.00483523	-	-	-	-	-
XLOC_002902	1:177481448-177481718	-	512.069	115.171	-2.15257	0.046	0.473923	-	-	-	-	-
XLOC_002956	1:197785875-197786647	-	1.41098	0	-inf	5e-05	0.00483523	-	-	-	-	-
XLOC_003010	1:224360092-224360383	-	391.621	66.04	-2.56804	0.00135	0.0607215	-	-	-	-	-
XLOC_003079	1:251608722-251614634	-	1.74028	0.312815	-2.47594	0.0244	0.369473	-	-	-	-	-
XLOC_003116	1:276406642-276407148	-	1.03204	0	-inf	0.0024	0.0908541	-	-	-	-	-
XLOC_003181	1:300608896-300609840	-	1.2265	0	-inf	5e-05	0.00483523	-	-	-	-	-
XLOC_003210	1:309261428-309261670	-	515.55	0	-inf	5e-05	0.00483523	-	-	-	-	-
XLOC_003267	10:15179858-15386849	ENSSSCG00000028881	3.87103	0.935002	-2.04968	0.00365	0.120393	100522393	I3LQZ6	10:15304507-15386849	CNIH3	cornichon family AMPA receptor auxiliary protein 3 [Source:HGNC Symbol;Acc:HGNC:26802]
XLOC_003277	10:16099446-16104932	-	1.88589	0.0523284	-5.17151	0.0417	0.457293	-	-	-	-	-
XLOC_003278	10:16140619-16179230	-	4.45105	0.142468	-4.96543	0.03875	0.444904	-	-	-	-	-
XLOC_003316	10:26308758-26332284	ENSSSCG00000010908	6.41355	1.71227	-1.90521	0.0033	0.114159	100522631	F1S5D8,K7GMW0	10:26308759-26332284	PTPRC	protein tyrosine phosphatase, receptor type, C [Source:HGNC Symbol;Acc:HGNC:9666]
XLOC_003343	10:31712487-31830025	ENSSSCG00000010944	29.6177	0.857187	-5.11071	5e-05	0.00483523	397038	F1S4K0	10:31712488-31830025	FBP1	fructose-1,6-bisphosphatase 1 [Source:RefSeq peptide;Acc:NP_999144]
XLOC_003465	10:59371106-59719307	ENSSSCG00000011090	3.67941	0.918375	-2.00232	0.00115	0.053772	100522395	F1RVG6	10:59609523-59713946	NEBL	nebulette [Source:HGNC Symbol;Acc:HGNC:16932]
XLOC_003491	10:70831451-70857734	ENSSSCG00000011133	4.31832	1.15214	-1.90616	0.006	0.166863	-	F1RUL2	10:70831452-70853803	PFKFB3	6-phosphofructo-2-kinase/fructose-2,6-biphosphatase 3 [Source:HGNC Symbol;Acc:HGNC:8874]
XLOC_003504	10:71833217-71895332	ENSSSCG00000011147|ENSSSCG00000011153	36.1319	11.4962	-1.65212	0.03355	0.416925	733634|-	F1RYV6|F1RYV5	10:71833306-71847875|10:71883135-71892873	-|-	Sus scrofa aldo-keto reductase family 1, member C1 (AKR1C1), mRNA. [Source:RefSeq mRNA;Acc:NM_001044569]|-
XLOC_003520	10:75638838-75711069	ENSSSCG00000011162	8.48868	3.55086	-1.25737	0.0246	0.369869	100522458	F1RX46	10:75648868-75711038	LARP4B	La ribonucleoprotein domain family, member 4B [Source:HGNC Symbol;Acc:HGNC:28987]
XLOC_003540	10:2279194-2304949	ENSSSCG00000010801	5.68277	2.04058	-1.47762	0.03785	0.439552	-	F1SAB0	10:2279195-2304949	-	-
XLOC_003543	10:2731386-2736686	ENSSSCG00000022427	13.5971	5.43536	-1.32285	0.04245	0.458346	397336	I3LEA2	10:2731389-2735645	RGS1	regulator of G-protein signaling 1 [Source:HGNC Symbol;Acc:HGNC:9991]
XLOC_003563	10:11227499-11238480	-	0.830584	0	-inf	0.02385	0.366573	-	-	-	-	-
XLOC_003564	10:11453242-11472609	-	0.952108	0	-inf	0.0001	0.00857863	-	-	-	-	-
XLOC_003597	10:15136565-15179564	ENSSSCG00000010849	13.7608	6.69246	-1.03995	0.04425	0.465588	100523327	F1S8S6	10:15136566-15179564	WDR26	WD repeat domain 26 [Source:HGNC Symbol;Acc:HGNC:21208]
XLOC_003606	10:16218455-16334149	ENSSSCG00000010850	46.9218	12.7676	-1.87777	0.0023	0.0881667	-	F1S8S4	10:16218456-16292135	ENAH	enabled homolog (Drosophila) [Source:HGNC Symbol;Acc:HGNC:18271]
XLOC_003691	10:31837904-32029746	ENSSSCG00000010948	555.378	76.7905	-2.85447	0.00145	0.0645371	100515919	F1S4J6	10:31907424-31913492	CTSL	cathepsin L [Source:HGNC Symbol;Acc:HGNC:2537]
XLOC_003830	10:71094381-71126102	ENSSSCG00000021815	6.14206	1.07769	-2.51078	0.01575	0.293931	-	I3LM29	10:71094382-71108500	IL15RA	interleukin 15 receptor, alpha [Source:HGNC Symbol;Acc:HGNC:5978]
XLOC_003844	10:72937901-72940864	-	8.1515	0.827166	-3.30082	0.0044	0.13547	-	-	-	-	-
XLOC_003882	10:4504751-4504994	-	126.239	0	-inf	5e-05	0.00483523	-	-	-	-	-
XLOC_004017	10:51801106-51801389	-	184.96	10.5455	-4.13251	0.0006	0.0319925	-	-	-	-	-
XLOC_004099	10:75570423-75571259	-	0.725732	0	-inf	0.00025	0.0168849	-	-	-	-	-
XLOC_004122	11:3493536-3602418	ENSSSCG00000009298	4.62867	1.41193	-1.71293	0.0247	0.370326	-	I3LJZ2,F1RTK4	11:3530444-3601260	CDK8	cyclin-dependent kinase 8 [Source:HGNC Symbol;Acc:HGNC:1779]
XLOC_004142	11:6309831-6359908	ENSSSCG00000009324	2.78076	0.377658	-2.88033	0.00615	0.16861	-	F1RSU0	11:6317524-6359908	SLC7A1	solute carrier family 7 (cationic amino acid transporter, y+ system), member 1 [Source:HGNC Symbol;Acc:HGNC:11057]
XLOC_004183	11:16006399-16037580	ENSSSCG00000009377	4.91131	1.22331	-2.00532	0.00945	0.221419	100513373	F1RMD4	11:16006494-16035388	THSD1	thrombospondin, type I, domain containing 1 [Source:HGNC Symbol;Acc:HGNC:17754]
XLOC_004202	11:18970906-19002976	ENSSSCG00000022159	9.32192	2.7973	-1.73659	0.00615	0.16861	100620938	I3LTV3	11:18971010-19002966	FNDC3A	fibronectin type III domain containing 3A [Source:HGNC Symbol;Acc:HGNC:20296]
XLOC_004205	11:19498474-19509196	-	0.71047	0.0616609	-3.52635	0.02315	0.362678	-	-	-	-	-
XLOC_004214	11:21534988-21685830	ENSSSCG00000009412	26.9216	3.37782	-2.9946	5e-05	0.00483523	100156254	F1RK02	11:21569933-21685279	LCP1	lymphocyte cytosolic protein 1 (L-plastin) [Source:HGNC Symbol;Acc:HGNC:6528]
XLOC_004255	11:49866491-49870148	ENSSSCG00000028760	3.70596	0.7461	-2.31241	0.0192	0.326523	-	F1RHF5	11:49869696-49870148	KLF5	Kruppel-like factor 5 (intestinal) [Source:HGNC Symbol;Acc:HGNC:6349]
XLOC_004257	11:52279938-52304719	-	9.52224	1.94368	-2.29251	0.02845	0.395345	-	-	-	-	-
XLOC_004261	11:52691816-52709805	-	2.1054	0.415547	-2.34101	0.042	0.457293	-	-	-	-	-
XLOC_004272	11:56736553-56739281	-	1.36497	0	-inf	5e-05	0.00483523	-	-	-	-	-
XLOC_004307	11:73458644-73590564	ENSSSCG00000009505	8.14233	2.65128	-1.61875	0.0218	0.352428	100519915	F1RP47	11:73512513-73590564	MBNL2	muscleblind-like splicing regulator 2 [Source:HGNC Symbol;Acc:HGNC:16746]
XLOC_004308	11:73723796-73725076	-	4.21255	0.939224	-2.16515	0.0427	0.458346	-	-	-	-	-
XLOC_004330	11:83014414-83048064	ENSSSCG00000009542	2.93038	0.905282	-1.69465	0.03185	0.409184	100038026	A0MTC9	11:83014418-83046597	TNFSF13B	tumor necrosis factor (ligand) superfamily, member 13b [Source:HGNC Symbol;Acc:HGNC:11929]
XLOC_004371	11:2159670-2277564	ENSSSCG00000009293	2.27516	0.893359	-1.34865	0.0279	0.391208	100522756	F1RTL7	11:2163384-2256282	-	-
XLOC_004386	11:5307311-5484880	ENSSSCG00000009320	9.89746	0.943	-3.39173	5e-05	0.00483523	-	F1RSU5	11:5316370-5455380	FLT1	fms-related tyrosine kinase 1 [Source:HGNC Symbol;Acc:HGNC:3763]
XLOC_004404	11:9429606-9619056	ENSSSCG00000009348	9.43927	2.28591	-2.04591	0.00185	0.0762766	-	F1RSR5	11:9429665-9467656	-	-
XLOC_004417	11:13083649-13086989	-	2.67891	0	-inf	0.0306	0.405617	-	-	-	-	-
XLOC_004418	11:13135949-13234024	ENSSSCG00000009361	90.1874	21.6214	-2.06047	0.01145	0.246807	100152401	F1RS37,I3LDM1	11:13198182-13233797	POSTN	periostin, osteoblast specific factor [Source:HGNC Symbol;Acc:HGNC:16953]
XLOC_004420	11:13841457-13847320	-	12.1531	1.30485	-3.21937	0.0057	0.161046	-	-	-	-	-
XLOC_004499	11:52192995-52195103	-	2.13814	0	-inf	0.00085	0.0423507	-	-	-	-	-
XLOC_004502	11:53663524-53669818	ENSSSCG00000009468	19.2119	6.426	-1.58	0.01075	0.237988	100524761	F1RHE6	11:53668524-53669504	KCTD12	potassium channel tetramerization domain containing 12 [Source:HGNC Symbol;Acc:HGNC:14678]
XLOC_004507	11:54689120-54719119	ENSSSCG00000009477	8.42549	3.80938	-1.14521	0.02545	0.374705	414911	P35463	11:54691946-54718001	EDNRB	endothelin receptor type B [Source:HGNC Symbol;Acc:HGNC:3180]
XLOC_004535	11:73753378-73765560	ENSSSCG00000009506	12.7981	3.44703	-1.89251	0.0182	0.315828	100155367	F2Z519	11:73765040-73765354	RAP2A	RAP2A, member of RAS oncogene family [Source:HGNC Symbol;Acc:HGNC:9861]
XLOC_004566	11:81561735-81610206	ENSSSCG00000009535	5.13577	1.50092	-1.77474	0.0054	0.15525	100135673	F1RLP4	11:81565082-81610206	EFNB2	-
XLOC_004707	11:19495893-19498370	-	2.00604	0.0658386	-4.92928	0.0185	0.318694	-	-	-	-	-
XLOC_004746	11:51706073-51706318	-	164.37	24.0415	-2.77335	0.02545	0.374705	-	-	-	-	-
XLOC_004782	11:73725241-73726680	-	10.882	2.97053	-1.87314	0.00345	0.117063	-	-	-	-	-
XLOC_004830	12:497121-562457	ENSSSCG00000017137	51.7274	20.5695	-1.33042	0.00845	0.211002	-	F1RZY9	12:554562-562054	METRNL	meteorin, glial cell differentiation regulator-like [Source:HGNC Symbol;Acc:HGNC:27584]
XLOC_004831	12:658370-667984	-	1.12217	0.106464	-3.39785	0.00305	0.106901	-	-	-	-	-
XLOC_004872	12:4861483-4888174	ENSSSCG00000023362	5.99021	1.54956	-1.95075	0.0027	0.0983604	100517601	F1RZ67,F1RZ68	12:4861484-4888174	RHBDF2	rhomboid 5 homolog 2 (Drosophila) [Source:HGNC Symbol;Acc:HGNC:20788]
XLOC_004906	12:6490102-6509578	ENSSSCG00000017234	32.9888	1.24697	-4.72547	5e-05	0.00483523	102158693	K7GL98,F1RV54,F1RV65,K7GKZ9,K7GKH2	12:6490149-6509578	CD300LF	-
XLOC_004908	12:6609316-6619178	ENSSSCG00000020967	2.97287	0.438563	-2.761	0.00165	0.0709167	-	I3LD39	12:6609317-6619163	-	-
XLOC_004909	12:6621091-6624944	ENSSSCG00000017236	19.2396	2.72684	-2.81878	0.00015	0.0115208	100514248	K7GRQ9,K7GMQ3,F1RV52	12:6621092-6624938	CD300C	-
XLOC_004969	12:18203581-18311058	ENSSSCG00000017328	3.5146	1.37952	-1.3492	0.0356	0.426939	100628007	F1RR27	12:18206639-18311004	ARHGAP27	Rho GTPase activating protein 27 [Source:HGNC Symbol;Acc:HGNC:31813]
XLOC_004991	12:19211066-19216305	ENSSSCG00000017355	69.924	31.2501	-1.16193	0.0432	0.461154	733645	F1RQZ0	12:19212206-19216305	GRN	-
XLOC_005035	12:20883342-20902558	ENSSSCG00000017411	0.827006	0.18767	-2.1397	0.03855	0.443565	100523692	F1S0Q7,K7GL82	12:20883455-20900739	KCNH4	potassium channel, voltage gated eag related subfamily H, member 4 [Source:HGNC Symbol;Acc:HGNC:6253]
XLOC_005040	12:21082916-21106780	ENSSSCG00000017421	50.0921	13.3683	-1.90577	0.0262	0.379963	-	F1S0N2	12:21082917-21106780	ACLY	ATP citrate lyase [Source:HGNC Symbol;Acc:HGNC:115]
XLOC_005049	12:21641867-21642248	ENSSSCG00000025789	4.78946	0	-inf	5e-05	0.00483523	-	F1RZX6	12:21641868-21642248	-	-
XLOC_005050	12:21646750-21647441	ENSSSCG00000029835	0.967506	0	-inf	0.0002	0.0143266	100518930	I3LET9	12:21646751-21647441	-	-
XLOC_005124	12:26250189-26308837	ENSSSCG00000017578	2.49554	0.769648	-1.69708	0.03185	0.409184	100517053	K7GM89,K7GKU7,K7GNL6,F1RT62,K7GSF0,K7GNC3	12:26250190-26308837	ITGA3	integrin, alpha 3 (antigen CD49C, alpha 3 subunit of VLA-3 receptor) [Source:HGNC Symbol;Acc:HGNC:6139]
XLOC_005208	12:37532552-37542010	ENSSSCG00000017671	59.0392	24.016	-1.29768	0.02755	0.391126	100524826	F1S223	12:37534660-37542007	RNFT1	ring finger protein, transmembrane 1 [Source:HGNC Symbol;Acc:HGNC:30206]
XLOC_005237	12:41159195-41165234	ENSSSCG00000017702	61.2862	9.22633	-2.73173	0.0012	0.0555	100516039	K7GQA8,F1S1A0,I3LM54	12:41160877-41165234	CCL23	-
XLOC_005254	12:42456841-42458852	ENSSSCG00000017721	22.5324	0.446163	-5.65829	0.00255	0.0948448	100302703	C7F842	12:42456842-42458852	CCL8	-
XLOC_005278	12:46002227-46062701	ENSSSCG00000017754	20.687	6.25671	-1.72525	0.0415	0.457293	396972	F1RJ33	12:46002258-46021360	-	galectin-9 [Source:RefSeq peptide;Acc:NP_999097]
XLOC_005304	12:47804245-47871716	ENSSSCG00000017791	3.26079	0.784051	-2.0562	0.0055	0.157275	-	-	12:47804246-47871712	SSH2	-
XLOC_005307	12:48551839-48623027	ENSSSCG00000017799	8.90605	4.14073	-1.1049	0.02605	0.37882	100517495	F1RN68	12:48551876-48622821	CPD	carboxypeptidase D [Source:HGNC Symbol;Acc:HGNC:2301]
XLOC_005388	12:54904769-54921464	ENSSSCG00000017943|ENSSSCG00000017945|ENSSSCG00000028073	8.74059	1.57957	-2.4682	0.00115	0.053772	-|100621980|100622059	F1SFT6|F1ST45|F1SFS6	12:54904770-54915794|12:54920061-54921464|12:54916989-54919775	ACAP1|TMEM95|KCTD11	ArfGAP with coiled-coil, ankyrin repeat and PH domains 1 [Source:HGNC Symbol;Acc:HGNC:16467]|transmembrane protein 95 [Source:HGNC Symbol;Acc:HGNC:27898]|potassium channel tetramerization domain containing 11 [Source:HGNC Symbol;Acc:HGNC:21302]
XLOC_005412	12:56077505-56118352	ENSSSCG00000024527	25.683	9.17629	-1.48483	0.0322	0.411444	100511592,100739126	I3LFP0	12:56077506-56118352	-	-
XLOC_005466	12:641839-657163	-	3.02401	0.237616	-3.66976	5e-05	0.00483523	-	-	-	-	-
XLOC_005474	12:1023476-1034681	ENSSSCG00000029944	23.5783	5.772	-2.03032	0.00395	0.125991	-	I3LC73	12:1023477-1034681	-	fatty acid synthase [Source:RefSeq peptide;Acc:NP_001093400]
XLOC_005480	12:1479053-1572636	ENSSSCG00000017142	10.7034	3.63254	-1.55902	0.01685	0.302773	100513228	F1RZB0	12:1516513-1572531	BAIAP2	BAI1-associated protein 2 [Source:HGNC Symbol;Acc:HGNC:947]
XLOC_005498	12:4186694-4236139	ENSSSCG00000017169	26.2315	11.6851	-1.16663	0.0157	0.293255	100515921	F1RZ70	12:4186695-4236139	SEC14L1	SEC14-like lipid binding 1 [Source:HGNC Symbol;Acc:HGNC:10698]
XLOC_005570	12:12398822-12443246	ENSSSCG00000017263	8.31573	4.00193	-1.05515	0.03185	0.409184	100522824	F1RV20	12:12403677-12443043	GNA13	guanine nucleotide binding protein (G protein), alpha 13 [Source:HGNC Symbol;Acc:HGNC:4381]
XLOC_005580	12:14758222-14877205	ENSSSCG00000018813	430.328	4.19496	-6.68064	0.0009	0.0446329	-	-	12:14862199-14862333	SNORA50	Small nucleolar RNA SNORA50 [Source:RFAM;Acc:RF00407]
XLOC_005597	12:16717753-16775469	ENSSSCG00000017306	23.9683	5.6473	-2.0855	0.0276	0.391126	397063	Q95JH1,K7GQG0,K7GML3	12:16717754-16775469	ITGB3	-
XLOC_005609	12:18447478-18474291	ENSSSCG00000017333	7.23435	1.2789	-2.49996	0.00035	0.0217727	100520585	F1RR22,I3LH80	12:18447825-18473774	FMNL1	formin-like 1 [Source:HGNC Symbol;Acc:HGNC:1212]
XLOC_005648	12:20481750-20492762	ENSSSCG00000017399|ENSSSCG00000017400	82.9289	14.1652	-2.54953	0.02905	0.397881	100147712|100519685	B2X0A4|F1S1D7	12:20482054-20485181|12:20485256-20492511	HSD17B1|NAGLU	-|N-acetylglucosaminidase, alpha [Source:HGNC Symbol;Acc:HGNC:7632]
XLOC_005657	12:21126544-21137415	ENSSSCG00000017427	2.68323	0.253261	-3.40527	5e-05	0.00483523	100736934	F1S0M4	12:21128488-21137028	HAP1	huntingtin-associated protein 1 [Source:HGNC Symbol;Acc:HGNC:4812]
XLOC_005746	12:26412494-26439875	ENSSSCG00000021015|ENSSSCG00000027593	224.855	88.9437	-1.33803	0.03055	0.405459	-|-	I3LA91|I3LUM2	12:26417119-26419206|12:26412517-26414328	-|-	-|-
XLOC_005754	12:26770675-26783066	ENSSSCG00000017570	38.6424	18.7679	-1.04192	0.04465	0.467485	100738426	F1RT92	12:26771409-26783066	-	-
XLOC_005764	12:28030804-28948870	ENSSSCG00000023169	3.29012	0.578942	-2.50665	0.02075	0.340893	-	K7GSQ9,I3LGR5	12:28270012-28376185	CA10	-
XLOC_005770	12:32355718-32389072	ENSSSCG00000017605	39.2562	13.9298	-1.49475	0.00485	0.145125	733665	F1RSF4	12:32362124-32389071	MMD	monocyte to macrophage differentiation protein [Source:RefSeq peptide;Acc:NP_001038060]
XLOC_005812	12:36560719-36604089	ENSSSCG00000022659	10.6942	2.40259	-2.15417	0.00305	0.106901	-	K7GKY1,I3LGD4	12:36561026-36603058	CLTC	clathrin heavy chain 1 [Source:RefSeq peptide;Acc:NP_001139599]
XLOC_005825	12:37666464-37738184	ENSSSCG00000017672	2.65013	0.511186	-2.37414	0.0007	0.0363232	100628203	F1S222,I3LGD0	12:37666521-37736693	-	-
XLOC_005858	12:42467617-42471014	ENSSSCG00000017720	6.64067	0.100007	-6.05316	0.04785	0.482334	100310829	F1S163	12:42467618-42471014	CCL1	-
XLOC_005868	12:44622104-44653020	ENSSSCG00000017738	4.15713	1.41645	-1.55331	0.03925	0.448225	100337675	D3K5M8	12:44622105-44653020	ADAP2	ArfGAP with dual PH domains 2 [Source:HGNC Symbol;Acc:HGNC:16487]
XLOC_005907	12:47450564-47458464	ENSSSCG00000017785	5.89435	1.42256	-2.05084	0.0082	0.206456	100519109	F1RN89	12:47450617-47458464	NUFIP2	nuclear fragile X mental retardation protein interacting protein 2 [Source:HGNC Symbol;Acc:HGNC:17634]
XLOC_005929	12:49514674-49526283	ENSSSCG00000024899	17.2899	5.4903	-1.65497	0.00115	0.053772	100524216	F1RHI2	12:49514985-49525727	FAM101B	family with sequence similarity 101, member B [Source:HGNC Symbol;Acc:HGNC:28705]
XLOC_005962	12:51638903-51706367	ENSSSCG00000017868	4.19328	0.370269	-3.50143	0.0124	0.257376	-	F1RGS5	12:51642373-51706358	-	-
XLOC_006026	12:54955583-54972426	ENSSSCG00000028278	6.42523	2.49333	-1.36568	0.03965	0.450616	100737040	I3LJR4	12:54955584-54972426	POLR2A	polymerase (RNA) II (DNA directed) polypeptide A, 220kDa [Source:HGNC Symbol;Acc:HGNC:9187]
XLOC_006077	12:56730917-56806935	ENSSSCG00000017991	1.75479	0.521587	-1.75032	0.01025	0.23125	396851	F1SS92	12:56731612-56799399	PIK3R5	-
XLOC_006082	12:57510201-57541657	ENSSSCG00000018001	6.30954	2.72689	-1.21028	0.0318	0.409184	-	F1SS71	12:57516159-57541657	GAS7	growth arrest-specific 7 [Source:HGNC Symbol;Acc:HGNC:4169]
XLOC_006128	12:249717-250270	-	5.29283	0.952018	-2.47498	0.038	0.440812	-	-	-	-	-
XLOC_006186	12:16776312-16776997	-	0.979437	0	-inf	0.00025	0.0168849	-	-	-	-	-
XLOC_006244	12:26208650-26208893	-	117.091	15.7094	-2.89792	0.03405	0.419594	-	-	-	-	-
XLOC_006288	12:40753628-40753903	-	202.687	15.8061	-3.6807	0.0083	0.208726	-	-	-	-	-
XLOC_006415	13:2565390-2597160	ENSSSCG00000026622	19.4879	6.70274	-1.53975	0.01835	0.317137	100517678	I3L9Q7	13:2581817-2597160	EAF1	-
XLOC_006494	13:26449964-26487870	ENSSSCG00000011267	8.60257	2.14246	-2.0055	0.04	0.45266	100152154	F1SJR0	13:26450234-26485261	MOBP	myelin-associated oligodendrocyte basic protein [Source:HGNC Symbol;Acc:HGNC:7189]
XLOC_006507	13:28519418-28605085	ENSSSCG00000011278	5.92838	2.15061	-1.4629	0.0134	0.267184	-	F1SJP2	13:28523492-28605085	TRAK1	trafficking protein, kinesin binding 1 [Source:HGNC Symbol;Acc:HGNC:29947]
XLOC_006513	13:28977697-28996333	ENSSSCG00000011289	2.5432	0.573046	-2.14992	0.0289	0.397445	100737352	F1SRE8	13:28991359-28992704	ACKR2	atypical chemokine receptor 2 [Source:HGNC Symbol;Acc:HGNC:1565]
XLOC_006523	13:30745716-30766350	ENSSSCG00000011305	0.928388	0.322369	-1.52601	0.0187	0.320324	-	F1SRB2	13:30745717-30750740	-	-
XLOC_006543	13:32459717-32466285	-	1.31268	0	-inf	0.0235	0.364139	-	-	-	-	-
XLOC_006544	13:32532564-32540182	ENSSSCG00000024311	8.74683	0.532585	-4.03768	5e-05	0.00483523	414372	Q6YT42	13:32532565-32538394	CCR2	-
XLOC_006545	13:32546285-32551732	ENSSSCG00000024344	6.00936	1.1158	-2.42914	0.00365	0.120393	414371	Q6YT41	13:32547168-32551732	CCR5	chemokine (C-C motif) receptor 5 (gene/pseudogene) [Source:HGNC Symbol;Acc:HGNC:1606]
XLOC_006584	13:35916861-35969293	ENSSSCG00000011400|ENSSSCG00000011401	28.9435	3.97377	-2.86466	0.0167	0.302253	100153200|-	F1SPP4|F1SPP2	13:35921157-35928150|13:35933297-35934707	SEMA3B|LSMEM2	sema domain, immunoglobulin domain (Ig), short basic domain, secreted, (semaphorin) 3B [Source:HGNC Symbol;Acc:HGNC:10724]|leucine-rich single-pass membrane protein 2 [Source:HGNC Symbol;Acc:HGNC:26781]
XLOC_006588	13:36353668-36359051	ENSSSCG00000011414	58.0503	3.95078	-3.87709	0.0003	0.0195183	-	K7GLJ7,K7GQX9,F1SJ17	13:36354904-36359051	CISH	cytokine inducible SH2-containing protein [Source:HGNC Symbol;Acc:HGNC:1984]
XLOC_006609	13:37647228-37652020	ENSSSCG00000011436	0.982125	0.119684	-3.03668	0.0146	0.279833	397007	Q5I2M3	13:37647229-37652020	TLR9	Toll-like receptor 9 [Source:UniProtKB/Swiss-Prot;Acc:Q5I2M3]
XLOC_006624	13:38572544-38980653	ENSSSCG00000011455|ENSSSCG00000023290|ENSSSCG00000023387|ENSSSCG00000023875|ENSSSCG00000024925|ENSSSCG00000025569|ENSSSCG00000028799	7.83005	1.93671	-2.01541	0.0057	0.161046	-|-|-|-|-|-|-	F1SH90|I3L6S4|I3LB50|I3L5I5|I3LJZ4|I3LS50|I3LD30	13:38940633-38980318|13:38902166-38905078|13:38912026-38915612|13:38638450-38640975|13:38919573-38923759|13:38895960-38899623|13:38916932-38919561	-|-|-|-|-|-|-	-|-|-|-|-|-|-
XLOC_006634	13:43756815-43820523	-	14.3719	1.10888	-3.69607	0.0004	0.0238375	-	-	-	-	-
XLOC_006685	13:68054340-68063109	ENSSSCG00000011536	3.02642	0.472245	-2.68	0.01395	0.273731	-	F1SFL0	13:68054341-68063109	-	-
XLOC_006700	13:73270667-73279261	ENSSSCG00000011560	33.156	10.2667	-1.6913	0.00205	0.0821351	100152256	F1SQD9	13:73271290-73278801	CRELD1	cysteine-rich with EGF-like domains 1 [Source:HGNC Symbol;Acc:HGNC:14630]
XLOC_006728	13:77532894-77610043	ENSSSCG00000011600	3.12469	1.27548	-1.29268	0.0385	0.443469	-	F1SPI3	13:77572738-77606188	-	-
XLOC_006733	13:78256433-78359680	ENSSSCG00000027634	14.0408	1.11531	-3.65411	0.0157	0.293255	-	I3LHL6	13:78326811-78337832	-	-
XLOC_006735	13:78614179-78704945	ENSSSCG00000011610	2.88245	0.591456	-2.28495	0.0098	0.226872	100515926	F1SPG4	13:78614180-78704945	NUP210	nucleoporin 210kDa [Source:HGNC Symbol;Acc:HGNC:30052]
XLOC_006755	13:81305204-81552433	ENSSSCG00000011630	33.5434	0.611445	-5.77766	0.017	0.303673	100037292	A3F9C6	13:81344050-81349274	ACKR4	-
XLOC_006757	13:82000992-82018935	ENSSSCG00000011635	1.17423	0.238024	-2.30253	0.0378	0.439552	100521929	F1SLB1	13:82000993-82018935	TMEM108	transmembrane protein 108 [Source:HGNC Symbol;Acc:HGNC:28451]
XLOC_006759	13:82170559-82183239	ENSSSCG00000011637	15.4885	5.46679	-1.50243	0.02395	0.366573	-	F1SLA8	13:82170560-82183239	-	-
XLOC_006768	13:82955554-82959997	-	0.942389	0	-inf	5e-05	0.00483523	-	-	-	-	-
XLOC_006835	13:100169650-100177780	ENSSSCG00000022105	1.03736	0.111434	-3.21865	0.00255	0.0948448	-	I3LMZ5	13:100173857-100175341	-	-
XLOC_006838	13:101031773-101038362	ENSSSCG00000011721	2.68786	0.886681	-1.59997	0.0308	0.406243	503666	F1SJM6	13:101032112-101034164	P2RY1	purinergic receptor P2Y, G-protein coupled, 1 [Source:HGNC Symbol;Acc:HGNC:8539]
XLOC_006839	13:101331192-101357334	ENSSSCG00000011722	3.66894	0.907791	-2.01493	0.0001	0.00857863	-	F1SJM5	13:101331694-101346671	RAP2B	RAP2B, member of RAS oncogene family [Source:HGNC Symbol;Acc:HGNC:9862]
XLOC_006844	13:103030463-103129360	ENSSSCG00000011723	16.0301	3.84377	-2.06019	0.0034	0.116481	100511536	K7GMJ2,K7GN87,F1SJM4	13:103030830-103128284	MME	membrane metallo-endopeptidase [Source:HGNC Symbol;Acc:HGNC:7154]
XLOC_006862	13:107806713-107966178	ENSSSCG00000011729	28.182	12.4249	-1.18154	0.0423	0.458346	100514494	F1SJL8	13:107835948-107966178	IQCJ-SCHIP1	IQCJ-SCHIP1 readthrough [Source:HGNC Symbol;Acc:HGNC:38842]
XLOC_006883	13:117850479-117940639	ENSSSCG00000011746	10.3644	4.72103	-1.13446	0.02975	0.400336	-	F1SH27	13:117852555-117940435	SKIL	SKI-like proto-oncogene [Source:HGNC Symbol;Acc:HGNC:10897]
XLOC_006931	13:131298453-131304880	ENSSSCG00000011781	42.1559	6.2033	-2.76463	0.00095	0.0461444	-	F1SG90	13:131300281-131303417	-	-
XLOC_006933	13:131464125-131470001	ENSSSCG00000011784	1.10189	0.0262669	-5.39059	0.0418	0.457293	-	F1SG87	13:131464126-131470001	HTR3D	5-hydroxytryptamine (serotonin) receptor 3D, ionotropic [Source:HGNC Symbol;Acc:HGNC:24004]
XLOC_006950	13:133066139-133076541	-	2.87928	0.208717	-3.78609	5e-05	0.00483523	-	-	-	-	-
XLOC_006967	13:134197270-134198935	-	2.68509	0	-inf	0.00035	0.0217727	-	-	-	-	-
XLOC_006979	13:137204572-137369721	ENSSSCG00000021206	5.60997	0.553568	-3.34116	5e-05	0.00483523	100628318	I3LR80	13:137315798-137369721	IL1RAP	interleukin 1 receptor accessory protein [Source:HGNC Symbol;Acc:HGNC:5995]
XLOC_006982	13:138015043-138088081	ENSSSCG00000011817	17.1216	6.43224	-1.41243	0.03425	0.420224	100520765	F1SFH2	13:138043701-138080419	CCDC50	coiled-coil domain containing 50 [Source:HGNC Symbol;Acc:HGNC:18111]
XLOC_006986	13:139159814-139164661	-	12.378	3.28418	-1.91417	0.0059	0.164944	-	-	-	-	-
XLOC_006999	13:142726218-142753686	ENSSSCG00000011837|ENSSSCG00000030778	3.2182	0.150734	-4.41617	0.0015	0.0663462	100156949|-	F1SQX4,K7GQJ9|K7GKK8,K7GNQ6	13:142726305-142751987|13:142726244-142739401	MFI2|MFI2	antigen p97 (melanoma associated) identified by monoclonal antibodies 133.2 and 96.5 [Source:HGNC Symbol;Acc:HGNC:7037]|-
XLOC_007023	13:146073238-146198174	-	1.22814	0.212554	-2.53057	0.04005	0.452672	-	-	-	-	-
XLOC_007038	13:148475188-148510950	ENSSSCG00000011884	10.3122	3.3619	-1.617	0.01305	0.265429	100521992	F1SPE8	13:148480008-148508215	HCLS1	hematopoietic cell-specific Lyn substrate 1 [Source:HGNC Symbol;Acc:HGNC:4844]
XLOC_007049	13:150428659-150616170	ENSSSCG00000011906	2.74319	0.721238	-1.92731	0.0223	0.356711	-	F1SPA1	13:150586607-150614293	IGSF11	immunoglobulin superfamily, member 11 [Source:HGNC Symbol;Acc:HGNC:16669]
XLOC_007067	13:156554456-156665967	ENSSSCG00000011925|ENSSSCG00000030856	15.1635	3.549	-2.09511	0.00415	0.130415	100155169|-	K7GQF3,K7GP43,K7GM29,F1SLU1|K7GLQ4,K7GPN0	13:156554457-156593722|13:156554487-156665967	CD200R1|CH242-101P22.3	cell surface glycoprotein CD200 receptor 1 precursor [Source:RefSeq peptide;Acc:NP_001230475]|-
XLOC_007079	13:158860322-158915497	ENSSSCG00000011936	2.94164	0.892471	-1.72074	0.03625	0.430368	100517972	F1SLS2	13:158884947-158887196	ZBED2	zinc finger, BED-type containing 2 [Source:HGNC Symbol;Acc:HGNC:20710]
XLOC_007092	13:162675917-162892788	ENSSSCG00000022486	17.5175	2.60119	-2.75155	0.00095	0.0461444	100621690	I3L7Q7	13:162677245-162892743	CBLB	Cbl proto-oncogene B, E3 ubiquitin protein ligase [Source:HGNC Symbol;Acc:HGNC:1542]
XLOC_007109	13:170261824-170292562	ENSSSCG00000026236	25.3135	1.44021	-4.13556	0.0008	0.0405238	100526139	I3LNB2	13:170261825-170278122	-	-
XLOC_007130	13:179675370-179725692	ENSSSCG00000011998	8.63306	2.14526	-2.00872	0.0026	0.0962	100233225	B8Y4S7	13:179675990-179719567	VGLL3	vestigial-like family member 3 [Source:HGNC Symbol;Acc:HGNC:24327]
XLOC_007136	13:186518743-186884532	ENSSSCG00000012001	6.11403	2.23786	-1.45	0.04745	0.481593	100517310	F1SK64	13:186520074-186882856	ROBO1	roundabout guidance receptor 1 [Source:HGNC Symbol;Acc:HGNC:10249]
XLOC_007149	13:193248683-193255129	-	5.21718	0	-inf	0.00085	0.0423507	-	-	-	-	-
XLOC_007160	13:200326406-200332161	ENSSSCG00000029488	34.0189	12.0873	-1.49285	0.0131	0.265684	100738012	I3LDG0,K7GS44	13:200326440-200332110	ADAMTS1	-
XLOC_007188	13:208079954-208133072	ENSSSCG00000028112	1.72391	0.226278	-2.92952	0.0133	0.266188	100622868	I3LF32	13:208080351-208130411	CLIC6	chloride intracellular channel 6 [Source:HGNC Symbol;Acc:HGNC:2065]
XLOC_007200	13:210717868-210727612	ENSSSCG00000012060	2.8896	0.335138	-3.10804	0.03935	0.448885	100153272	F1SGV9	13:210717869-210726747	RIPPLY3	ripply transcriptional repressor 3 [Source:HGNC Symbol;Acc:HGNC:3047]
XLOC_007205	13:212004863-212059558	ENSSSCG00000012066	1.5769	0.1488	-3.40565	5e-05	0.00483523	100152071	F1SGV3	13:212018091-212022237	KCNJ15	potassium channel, inwardly rectifying subfamily J, member 15 [Source:HGNC Symbol;Acc:HGNC:6261]
XLOC_007225	13:216918612-217043304	-	3.1851	0.315201	-3.33699	0.0192	0.326523	-	-	-	-	-
XLOC_007265	13:9482955-9815818	ENSSSCG00000011208	28.1608	4.29136	-2.71418	0.0003	0.0195183	100520455	F1RS58	13:9483097-9815818	ZNF385D	zinc finger protein 385D [Source:HGNC Symbol;Acc:HGNC:26191]
XLOC_007277	13:15479010-15753999	ENSSSCG00000011218	4.52591	1.7112	-1.4032	0.0106	0.236141	100524044	F1RRH2	13:15480082-15550068	SLC4A7	solute carrier family 4, sodium bicarbonate cotransporter, member 7 [Source:HGNC Symbol;Acc:HGNC:11033]
XLOC_007296	13:21177352-21185335	-	24.5129	4.87944	-2.32875	0.0328	0.414382	-	-	-	-	-
XLOC_007318	13:26092996-26112334	ENSSSCG00000011264	14.2197	2.72442	-2.38387	5e-05	0.00483523	100519275	F1SJR3	13:26092997-26105056	CSRNP1	cysteine-serine-rich nuclear protein 1 [Source:HGNC Symbol;Acc:HGNC:14300]
XLOC_007319	13:26127750-26137301	ENSSSCG00000011265	11.6016	0.315716	-5.19956	0.00085	0.0423507	100134978	F1SJR2	13:26127754-26137301	XIRP1	xin actin binding repeat containing 1 [Source:HGNC Symbol;Acc:HGNC:14301]
XLOC_007357	13:32163090-32243156	ENSSSCG00000011317	7.3732	2.84502	-1.37385	0.02705	0.387013	100151740	F1SNY8,K7GKS1	13:32166988-32239205	FYCO1	FYVE and coiled-coil domain-containing protein 1 [Source:RefSeq peptide;Acc:NP_001121949]
XLOC_007358	13:32246792-32286487	ENSSSCG00000026707	1.24814	0.0503943	-4.63038	5e-05	0.00483523	414375	Q75ZH8	13:32247996-32256018	XCR1	chemokine (C motif) receptor 1 [Source:HGNC Symbol;Acc:HGNC:1625]
XLOC_007361	13:32323641-32330286	ENSSSCG00000011322	64.6458	1.83897	-5.13559	5e-05	0.00483523	414374	Q6YST0	13:32323642-32330286	CCR1	-
XLOC_007465	13:38418427-38447163	ENSSSCG00000021408	155.117	38.4535	-2.01217	0.00515	0.15071	100127150	A8U4R4	13:38418428-38447163	TKT	-
XLOC_007483	13:43455339-43546667	ENSSSCG00000011468	6.22189	1.47921	-2.07253	0.025	0.372424	-	F1SGJ6	13:43455340-43545275	SLMAP	sarcolemma associated protein [Source:HGNC Symbol;Acc:HGNC:16643]
XLOC_007485	13:43827502-44015762	ENSSSCG00000011471	26.2592	5.37464	-2.28858	0.0198	0.331428	-	F1SGJ3	13:43872847-43896031	FLNB	filamin B, beta [Source:HGNC Symbol;Acc:HGNC:3755]
XLOC_007506	13:50518487-51023196	ENSSSCG00000011496	3.18555	0.983024	-1.69625	0.04285	0.459493	100520218	F1SFS3	13:50518488-50690257	ADAMTS9	ADAM metallopeptidase with thrombospondin type 1 motif, 9 [Source:HGNC Symbol;Acc:HGNC:13202]
XLOC_007548	13:67738388-67741928	-	13.9679	0.0706211	-7.6278	0.0017	0.0721906	-	-	-	-	-
XLOC_007549	13:67874603-67921552	ENSSSCG00000011535	49.296	18.902	-1.38293	0.02135	0.348329	-	F1SFL1	13:67874604-67921552	ARL8B	ADP-ribosylation factor-like 8B [Source:HGNC Symbol;Acc:HGNC:25564]
XLOC_007550	13:68134190-68138787	-	18.4695	5.97378	-1.62843	0.0027	0.0983604	-	-	-	-	-
XLOC_007551	13:68147560-68154058	ENSSSCG00000020679	4.34313	0.606734	-2.8396	0.0134	0.267184	-	I3L8J0	13:68147561-68154058	EDEM1	ER degradation enhancer, mannosidase alpha-like 1 [Source:HGNC Symbol;Acc:HGNC:18967]
XLOC_007580	13:75960429-76006667	ENSSSCG00000011583	8.95456	1.84465	-2.27927	0.0312	0.408183	-	F1SQ88	13:75975432-76006663	TMEM40	transmembrane protein 40 [Source:HGNC Symbol;Acc:HGNC:25620]
XLOC_007593	13:78256433-78359680	ENSSSCG00000011609	14.152	1.93146	-2.87324	0.0021	0.0836657	-	F1SPG5	13:78256434-78359474	-	-
XLOC_007594	13:78502875-78527700	-	18.6741	1.95398	-3.25655	0.0004	0.0238375	-	-	-	-	-
XLOC_007616	13:80507850-80515830	ENSSSCG00000026804	4.79618	1.67376	-1.5188	0.03875	0.444904	-	I3LAX5	13:80507851-80515830	-	-
XLOC_007617	13:80518365-80608352	ENSSSCG00000024001	8.16031	1.9976	-2.03035	0.00905	0.217804	-	I3LTJ1	13:80518366-80608352	-	-
XLOC_007630	13:83024432-83040145	ENSSSCG00000011643	6.60381	1.69789	-1.95956	0.00185	0.0762766	-	F1SL93	13:83024710-83040145	-	-
XLOC_007689	13:97551480-97593158	-	3.41348	0.206858	-4.04453	0.0419	0.457293	-	-	-	-	-
XLOC_007705	13:99782775-99786098	ENSSSCG00000011716	1.03407	0.154088	-2.74651	0.0247	0.370326	100524766	F1SJM9	13:99784679-99785779	P2RY13	purinergic receptor P2Y, G-protein coupled, 13 [Source:HGNC Symbol;Acc:HGNC:4537]
XLOC_007762	13:118588690-118679388	ENSSSCG00000028905	2.84903	0.341748	-3.05946	0.00045	0.025875	-	I3LA58	13:118591225-118679388	TNIK	TRAF2 and NCK interacting kinase [Source:HGNC Symbol;Acc:HGNC:30765]
XLOC_007764	13:119077138-119362303	ENSSSCG00000011750	14.785	4.14273	-1.83548	0.01255	0.258973	100519446	F1SH14	13:119143381-119362303	PLD1	phospholipase D1, phosphatidylcholine-specific [Source:HGNC Symbol;Acc:HGNC:9067]
XLOC_007765	13:119779313-119842558	ENSSSCG00000011752	17.4509	7.56122	-1.20661	0.02605	0.37882	-	F1SH12	13:119779314-119842558	FNDC3B	fibronectin type III domain containing 3B [Source:HGNC Symbol;Acc:HGNC:24670]
XLOC_007790	13:130474356-130494881	ENSSSCG00000024393	3.1212	0.843097	-1.88833	0.01375	0.272375	397599	Q864U8	13:130478533-130494818	B3GNT5	UDP-GlcNAc:betaGal beta-1,3-N-acetylglucosaminyltransferase 5 [Source:HGNC Symbol;Acc:HGNC:15684]
XLOC_007796	13:131309011-131452699	ENSSSCG00000011782	117.685	9.17609	-3.6809	0.0057	0.161046	-	F1SG89	13:131309017-131364828	ABCC5	ATP-binding cassette, sub-family C (CFTR/MRP), member 5 [Source:HGNC Symbol;Acc:HGNC:56]
XLOC_007810	13:132907660-132913846	ENSSSCG00000025921	4.34834	1.42586	-1.60863	0.01025	0.23125	-	I3LPS6	13:132907661-132913279	TMEM41A	transmembrane protein 41A [Source:HGNC Symbol;Acc:HGNC:30544]
XLOC_007811	13:132915176-132957636	ENSSSCG00000011793	21.7278	1.70149	-3.67467	0.04125	0.457293	-	F1SFK2	13:132927334-132945675	LIPH	lipase, member H [Source:HGNC Symbol;Acc:HGNC:18483]
XLOC_007827	13:136969632-136987446	ENSSSCG00000028484	1.34797	0.0765532	-4.13818	0.00365	0.120393	100625166	I3LHE9	13:136971662-136987446	CLDN1	-
XLOC_007841	13:140888271-141023097	ENSSSCG00000011825	13.9204	1.79016	-2.95903	0.00025	0.0168849	100522900	F1SFG4	13:140888272-141023097	ATP13A3	ATPase type 13A3 [Source:HGNC Symbol;Acc:HGNC:24113]
XLOC_007849	13:142925308-143031381	ENSSSCG00000011843	8.62843	2.01352	-2.09938	0.0087	0.214466	-	F1SQW0	13:142925309-143031336	PAK2	p21 protein (Cdc42/Rac)-activated kinase 2 [Source:HGNC Symbol;Acc:HGNC:8591]
XLOC_007851	13:143119130-143144054	ENSSSCG00000023527	2.45844	0.673102	-1.86884	0.01205	0.254582	100620479	I3L9N0	13:143119131-143144054	NRROS	negative regulator of reactive oxygen species [Source:HGNC Symbol;Acc:HGNC:24613]
XLOC_007876	13:147318702-147429954	ENSSSCG00000028575	6.55798	1.54885	-2.08205	0.0248	0.371267	-	I3LT55	13:147351811-147363473	-	-
XLOC_007886	13:147907846-147991238	ENSSSCG00000011878	4.75517	1.27051	-1.90409	0.0434	0.461898	100520980	F1SQ21	13:147907932-147935070	CASR	calcium-sensing receptor [Source:HGNC Symbol;Acc:HGNC:1514]
XLOC_007888	13:148053963-148130735	ENSSSCG00000011877	4.91583	0.99732	-2.30131	0.00215	0.0851792	397441	K7GPM7,K7GMU1,K7GL47,F1SQ22,F1SQ33	13:148057108-148104960	CD86	CD86 molecule [Source:HGNC Symbol;Acc:HGNC:1705]
XLOC_007979	13:170350017-170362339	ENSSSCG00000011977	19.4289	4.34338	-2.16131	0.0016	0.0698973	-	F1SK96	13:170350018-170362339	DCBLD2	discoidin, CUB and LCCL domain containing 2 [Source:HGNC Symbol;Acc:HGNC:24627]
XLOC_008000	13:172665110-172743599	ENSSSCG00000021732|ENSSSCG00000022895	1.68549	0.290513	-2.5365	0.02765	0.391126	-|-	I3LT84,I3LGR2|I3LUY9	13:172665111-172695684|13:172696363-172707950	CRYBG3|-	beta-gamma crystallin domain containing 3 [Source:HGNC Symbol;Acc:HGNC:34427]|-
XLOC_008009	13:179476086-179561177	ENSSSCG00000011997	44.1922	18.9465	-1.22186	0.0369	0.433488	100516044	F2Z5Q1	13:179477029-179512316	CHMP2B	charged multivesicular body protein 2B [Source:HGNC Symbol;Acc:HGNC:24537]
XLOC_008018	13:189548937-189866576	ENSSSCG00000012008	26.1183	1.57098	-4.05532	0.0472	0.480469	-	F1SK57	13:189683758-189716074	SAMSN1	SAM domain, SH3 domain and nuclear localization signals 1 [Source:HGNC Symbol;Acc:HGNC:10528]
XLOC_008024	13:192505849-192542993	ENSSSCG00000021429	8.36517	3.91677	-1.09473	0.034	0.419594	100736918	I3LJE9	13:192505850-192540712	C21orf91	chromosome 21 open reading frame 91 [Source:HGNC Symbol;Acc:HGNC:16459]
XLOC_008032	13:199061537-199071695	ENSSSCG00000019154	19.0406	3.79534	-2.32678	0.00065	0.0342296	100526376	-	13:199063344-199063424	ssc-mir-155	ssc-mir-155 [Source:miRBase;Acc:MI0015907]
XLOC_008067	13:205423961-205460873	-	52.3677	3.89138	-3.75032	0.004	0.126637	-	-	-	-	-
XLOC_008088	13:208200828-208304419	ENSSSCG00000012051	10.9307	1.69702	-2.68731	0.00015	0.0115208	100512633	F1SGX5	13:208204968-208304419	RUNX1	runt-related transcription factor 1 [Source:RefSeq peptide;Acc:NP_001233181]
XLOC_008113	13:215025830-215059085	ENSSSCG00000012076	4.88823	1.696	-1.52718	0.0229	0.36062	-	K7GPA0,F1SG66	13:215028064-215059085	MX2	MX dynamin-like GTPase 2 [Source:HGNC Symbol;Acc:HGNC:7533]
XLOC_008133	13:216918612-217043304	ENSSSCG00000022246	20.2143	3.00793	-2.74853	0.04015	0.452672	100621467	I3LU56	13:216984861-216994632	-	-
XLOC_008145	13:217445637-217475903	ENSSSCG00000025133	14.5323	2.42969	-2.58042	0.00015	0.0115208	396943	A8DSD5	13:217446028-217475903	ITGB2	-
XLOC_008153	13:218430205-218440700	ENSSSCG00000028960	23.8711	8.82274	-1.43596	0.0202	0.334961	100625332	I3L7C2	13:218430206-218440700	-	-
XLOC_008235	13:35315095-35317334	-	13.9144	5.44923	-1.35245	0.03345	0.416925	-	-	-	-	-
XLOC_008400	13:89466819-89525340	-	440.751	133.093	-1.72752	0.0336	0.41706	-	-	-	-	-
XLOC_008443	13:118339165-118340059	-	0.864213	0	-inf	0.0002	0.0143266	-	-	-	-	-
XLOC_008509	13:136882616-136884264	-	1.96869	0.0931053	-4.40223	0.0253	0.373531	-	-	-	-	-
XLOC_008550	13:149145880-149147047	-	0.921534	0	-inf	5e-05	0.00483523	-	-	-	-	-
XLOC_008559	13:153027408-153028077	-	6.56999	0.889878	-2.88421	0.0256	0.376347	-	-	-	-	-
XLOC_008589	13:157196242-157196405	-	7581.35	541.023	-3.80869	0.0118	0.250794	-	-	-	-	-
XLOC_008603	13:164154264-164154445	-	1842.54	0	-inf	5e-05	0.00483523	-	-	-	-	-
XLOC_008689	13:216531204-216538712	-	0.726206	0.243293	-1.57768	0.029	0.397792	-	-	-	-	-
XLOC_008700	14:883129-899880	ENSSSCG00000009580	6.27489	0.507554	-3.62796	5e-05	0.00483523	100154607	F1RN19	14:883130-894214	S1PR3	sphingosine-1-phosphate receptor 3 [Source:HGNC Symbol;Acc:HGNC:3167]
XLOC_008710	14:4323875-4353798	ENSSSCG00000028694	24.1213	9.75396	-1.30625	0.014	0.273731	100523998	F1RMZ8	14:4323926-4353798	-	-
XLOC_008738	14:9418141-9481621	ENSSSCG00000009644	2.59499	0.755345	-1.78052	0.0225	0.357763	100152711	F1RM87	14:9426169-9481493	ADAM28	ADAM metallopeptidase domain 28 [Source:HGNC Symbol;Acc:HGNC:206]
XLOC_008751	14:12242678-12375188	ENSSSCG00000009664	9.25003	1.30753	-2.82261	5e-05	0.00483523	100157507	F1RJS6,K7GLY6	14:12242679-12375188	PTK2B	protein tyrosine kinase 2 beta [Source:HGNC Symbol;Acc:HGNC:9612]
XLOC_008781	14:19850277-19889150	-	1.79954	0.0459869	-5.29027	0.04785	0.482334	-	-	-	-	-
XLOC_008801	14:24089020-24133735	ENSSSCG00000009733	3.32037	1.09984	-1.59405	0.02915	0.397969	100155657	F1RI72	14:24096687-24133735	-	-
XLOC_008835	14:31807453-31858571	ENSSSCG00000021261	131.358	0.826096	-7.31298	0.0002	0.0143266	-	I3LJC1	14:31807454-31858571	-	-
XLOC_008904	14:41228712-41314360	ENSSSCG00000009880	12.5784	2.10924	-2.57615	0.0161	0.296818	-	F1RKA8	14:41230165-41288614	SLC8B1	solute carrier family 8 (sodium/lithium/calcium exchanger), member B1 [Source:HGNC Symbol;Acc:HGNC:26175]
XLOC_008938	14:44702548-44727523	ENSSSCG00000024495	7.41641	0.440259	-4.0743	0.0003	0.0195183	100125963	I3LCL2	14:44718076-44719326	SELPLG	-
XLOC_008941	14:44964085-45124937	ENSSSCG00000009947	1.66363	0.622926	-1.4172	0.0269	0.385126	780421	B1PHQ8	14:44964240-45118925	CMKLR1	Chemokine-like receptor 1 [Source:UniProtKB/Swiss-Prot;Acc:B1PHQ8]
XLOC_008944	14:45733677-45909737	ENSSSCG00000009953|ENSSSCG00000009954	18.206	3.17863	-2.51793	0.0131	0.265684	100154475|100157434	F1RG90,F1RG89,F1RG88|F2Z4Y7	14:45824560-45896852|14:45904813-45909593	KIAA1671|CRYBB3	KIAA1671 [Source:HGNC Symbol;Acc:HGNC:29345]|crystallin, beta B3 [Source:HGNC Symbol;Acc:HGNC:2400]
XLOC_008983	14:51094884-51162599	ENSSSCG00000010025	15.0501	4.38352	-1.77961	0.0287	0.395974	100156359	F1RPC2	14:51124239-51149278	LIMK2	LIM domain kinase 2 [Source:HGNC Symbol;Acc:HGNC:6614]
XLOC_009074	14:59032169-59054154	ENSSSCG00000023708	46.7811	2.27443	-4.36235	0.00195	0.0793236	100620325	I3LV22	14:59032170-59054154	-	-
XLOC_009123	14:70450036-70684340	ENSSSCG00000010219	35.6685	8.16964	-2.1263	0.00385	0.124292	100622249	F1RFC2	14:70609583-70684100	ARID5B	AT rich interactive domain 5B (MRF1-like) [Source:HGNC Symbol;Acc:HGNC:17362]
XLOC_009131	14:72368215-72403813	-	22.6698	3.64798	-2.6356	0.01625	0.298548	-	-	-	-	-
XLOC_009162	14:80010892-80098915	ENSSSCG00000010276	6.61391	1.43854	-2.2009	0.00035	0.0217727	733600	F1SUB0	14:80010893-80098908	UNC5B	unc-5 netrin receptor B [Source:HGNC Symbol;Acc:HGNC:12568]
XLOC_009181	14:82755601-82761505	ENSSSCG00000010312	24.053	9.94715	-1.27386	0.02575	0.377035	396985	F1SU38	14:82755602-82761495	PLAU	-
XLOC_009193	14:88334130-88341267	ENSSSCG00000010330	31.3211	11.5573	-1.43833	0.00585	0.164194	100152612	F1S2E3	14:88334131-88341267	-	-
XLOC_009271	14:109873541-109939491	ENSSSCG00000010448	10.2003	1.48572	-2.77938	0.0002	0.0143266	396826	F1SCY7	14:109911958-109939489	FAS	Fas cell surface death receptor [Source:HGNC Symbol;Acc:HGNC:11920]
XLOC_009277	14:110951178-110964277	-	1.00406	0.0261721	-5.26168	0.04165	0.457293	-	-	-	-	-
XLOC_009290	14:114417201-114439186	ENSSSCG00000025877	11.6011	4.88382	-1.24819	0.03745	0.437397	-	I3LR15	14:114425502-114439186	-	-
XLOC_009295	14:115066293-115076782	ENSSSCG00000027230	5.35417	1.8876	-1.50411	0.0335	0.416925	100156133	I3LCX7	14:115066294-115076782	SLC35G1	solute carrier family 35, member G1 [Source:HGNC Symbol;Acc:HGNC:26607]
XLOC_009383	14:131738215-131804261	ENSSSCG00000010624	80.6216	1.9838	-5.34483	0.0001	0.00857863	100157144	F1S5M6	14:131791153-131804261	DUSP5	dual specificity phosphatase 5 [Source:HGNC Symbol;Acc:HGNC:3071]
XLOC_009427	14:141285454-141331373	ENSSSCG00000010690	5.29696	1.22045	-2.11775	0.00395	0.125991	-	F1S409	14:141285455-141331373	SEC23IP	SEC23 interacting protein [Source:HGNC Symbol;Acc:HGNC:17018]
XLOC_009433	14:142958301-143131283	ENSSSCG00000028063	16.2109	5.26792	-1.62166	0.00235	0.0894387	-	K7GNL9,K7GMV0,K7GT58,K7GQ96,K7GQ88,K7GS18,I3LM30,I3L8P8,K7GQV8	14:142972347-143131283	TACC2	transforming, acidic coiled-coil containing protein 2 [Source:HGNC Symbol;Acc:HGNC:11523]
XLOC_009435	14:143242687-143283390	-	16.6612	2.76834	-2.5894	0.0243	0.369473	-	-	-	-	-
XLOC_009436	14:143414331-143470525	ENSSSCG00000010702	13.0296	5.3285	-1.29	0.0165	0.300289	100157647	F1SEH5	14:143414802-143468369	PLEKHA1	pleckstrin homology domain containing, family A (phosphoinositide binding specific) member 1 [Source:HGNC Symbol;Acc:HGNC:14335]
XLOC_009441	14:143745470-143752510	ENSSSCG00000010705	253.529	78.0273	-1.7001	0.0206	0.339477	100515973	K7GNH4,F1SEH2,K7GRQ1,K7GN45,K7GPP9	14:143745490-143752509	GMFG	glia maturation factor, gamma [Source:HGNC Symbol;Acc:HGNC:4374]
XLOC_009457	14:145367002-145368204	-	1.7216	0	-inf	5e-05	0.00483523	-	-	-	-	-
XLOC_009468	14:147210202-147400295	-	2.44567	0.0534221	-5.51665	0.0222	0.355919	-	-	-	-	-
XLOC_009519	14:4718534-4748337	ENSSSCG00000009602	25.2078	10.1296	-1.31529	0.0102	0.231102	106504095	F1RMZ8	14:4718535-4748277	-	-
XLOC_009523	14:6534280-6721983	ENSSSCG00000009612	21.8727	5.77254	-1.92185	0.0492	0.485722	100152025	F1RMC2	14:6618168-6622585	DOK2	-
XLOC_009534	14:7422257-7428166	ENSSSCG00000009630	6.73738	0.106948	-5.9772	0.0008	0.0405238	100516296	F1RMA1	14:7426276-7428160	EGR3	early growth response 3 [Source:HGNC Symbol;Acc:HGNC:3240]
XLOC_009543	14:10117157-10122970	ENSSSCG00000009648	17.6134	0.273858	-6.0071	0.036	0.429316	100625407	F1RJU6	14:10117158-10122555	NEFM	neurofilament, medium polypeptide [Source:HGNC Symbol;Acc:HGNC:7734]
XLOC_009584	14:21965219-22045684	ENSSSCG00000029331	104.314	39.7251	-1.39281	0.0326	0.413575	-	I3LH91	14:21977211-22007114	PALLD	palladin, cytoskeletal associated protein [Source:HGNC Symbol;Acc:HGNC:17068]
XLOC_009647	14:33446090-33492191	-	5.53465	1.12901	-2.29344	0.0354	0.426583	-	-	-	-	-
XLOC_009666	14:35688327-35765639	ENSSSCG00000009844	247.32	22.9029	-3.43278	5e-05	0.00483523	100155338	F1RKH4	14:35688333-35701411	HSPB8	heat shock 22kDa protein 8 [Source:HGNC Symbol;Acc:HGNC:30171]
XLOC_009668	14:36410862-36447482	ENSSSCG00000009849	9.08257	4.38956	-1.04902	0.03645	0.431058	100153179	F1RKH0	14:36413480-36447476	SUDS3	-
XLOC_009723	14:44805609-44812531	ENSSSCG00000009945	4.4585	1.50303	-1.56869	0.0179	0.313176	100621588	F1RGA8	14:44806678-44812222	-	-
XLOC_009739	14:49420323-49426461	ENSSSCG00000009977	6.61294	2.0061	-1.7209	0.0331	0.416195	100513761	F1RFH1	14:49420329-49423167	RASL10A	RAS-like, family 10, member A [Source:HGNC Symbol;Acc:HGNC:16954]
XLOC_009748	14:50260426-50277435	ENSSSCG00000009996	26.4306	3.47147	-2.92859	0.0001	0.00857863	399503	Q9GKZ8	14:50263722-50266807	LIF	leukemia inhibitory factor [Source:HGNC Symbol;Acc:HGNC:6596]
XLOC_009749	14:50281695-50289382	ENSSSCG00000009997	12.9408	0.989657	-3.70885	0.02325	0.362908	100152038	F1RFE6	14:50281701-50286188	OSM	oncostatin M [Source:HGNC Symbol;Acc:HGNC:8506]
XLOC_009762	14:51034692-51040392	ENSSSCG00000010023	21.1203	2.77522	-2.92796	0.0001	0.00857863	100511161	F1RPC3	14:51035499-51040030	PLA2G3	phospholipase A2, group III [Source:HGNC Symbol;Acc:HGNC:17934]
XLOC_009784	14:53393868-53402998	ENSSSCG00000010077	1.83659	0.25504	-2.84823	0.042	0.457293	100523213	F1RL06	14:53394004-53402671	-	-
XLOC_009785	14:53414566-53415277	ENSSSCG00000022467	13.1899	1.7897	-2.88165	0.0012	0.0555	767627	I3L9U3	14:53414567-53415277	VPREB1	pre-B lymphocyte 1 [Source:HGNC Symbol;Acc:HGNC:12709]
XLOC_009824	14:59062488-59101479	ENSSSCG00000010148	44.4503	8.53375	-2.38094	0.00105	0.0498633	-	F1RGY8	14:59062489-59079456	-	-
XLOC_009834	14:61440556-61548593	ENSSSCG00000010163	17.1794	1.15633	-3.89305	5e-05	0.00483523	100156432	F1RGV1	14:61442843-61548448	KCNK1	potassium channel, two pore domain subfamily K, member 1 [Source:HGNC Symbol;Acc:HGNC:6272]
XLOC_009880	14:69872732-70002421	ENSSSCG00000023525	15.0222	1.13155	-3.73073	0.00015	0.0115208	100157089	F1RFY9	14:69953823-70001435	TMEM26	-
XLOC_009887	14:71516962-71523671	ENSSSCG00000010224	12.6563	0.873939	-3.85618	5e-05	0.00483523	100038004	A1XSY8	14:71516963-71521113	EGR2	early growth response 2 [Source:HGNC Symbol;Acc:HGNC:3239]
XLOC_009960	14:88733599-88820468	ENSSSCG00000010338	9.55453	0.268501	-5.15318	0.00065	0.0342296	100524960	F1SEQ9	14:88787591-88801507	DYDC1	DPY30 domain containing 1 [Source:HGNC Symbol;Acc:HGNC:23460]
XLOC_009983	14:95803851-95874980	ENSSSCG00000010370|ENSSSCG00000010371	4.24143	0.969798	-2.12879	0.0113	0.245564	100155930|-	K7GQD0,F1SEN1|I3L607,F1SEN0,K7GPT2,I3LSC4	14:95804112-95825709|14:95827074-95864664	ANXA8|ANTXRL	-|anthrax toxin receptor-like [Source:HGNC Symbol;Acc:HGNC:27277]
XLOC_010003	14:98193537-98199497	-	3.57929	0	-inf	0.0029	0.102829	-	-	-	-	-
XLOC_010007	14:98575268-98683624	ENSSSCG00000010400	26256.3	1564.42	-4.06896	0.00245	0.091929	396852	O02826	14:98575269-98625342	MSMB	Beta-microseminoprotein [Source:UniProtKB/Swiss-Prot;Acc:O02826]
XLOC_010018	14:103242162-103244636	-	1.17536	0.203716	-2.52847	0.0331	0.416195	-	-	-	-	-
XLOC_010032	14:110108090-110111099	ENSSSCG00000010449	16.5745	4.86006	-1.76992	0.00735	0.192102	100157868	F1SCY5	14:110108612-110109424	CH25H	cholesterol 25-hydroxylase [Source:HGNC Symbol;Acc:HGNC:1907]
XLOC_010035	14:110260091-110285501	ENSSSCG00000010455	1.17539	0.239201	-2.29684	0.0047	0.141833	100157079	F1SCX9,I3LC56	14:110260092-110285501	SLC16A12	solute carrier family 16, member 12 [Source:HGNC Symbol;Acc:HGNC:23094]
XLOC_010036	14:110396190-110498871	ENSSSCG00000010456	11.5294	2.78824	-2.04789	0.0028	0.100966	100154650	F1SCX8	14:110397901-110460603	PANK1	pantothenate kinase 1 [Source:HGNC Symbol;Acc:HGNC:8598]
XLOC_010069	14:117451193-117599385	ENSSSCG00000010507	1.2666	0.181852	-2.80013	0.03615	0.430141	100157589	F1SBG0	14:117454645-117514823	TLL2	tolloid-like 2 [Source:HGNC Symbol;Acc:HGNC:11844]
XLOC_010080	14:118623933-118629819	ENSSSCG00000010529	3.91372	0.665378	-2.5563	0.00075	0.0383564	100153176	F1S8X3	14:118623934-118629819	SFRP5	-
XLOC_010108	14:122553911-122574039	ENSSSCG00000010567	22.1078	8.0347	-1.46024	0.032	0.410368	-	F1S8T8	14:122553912-122559460	-	-
XLOC_010122	14:123773104-123779533	ENSSSCG00000010591	30.4561	10.9187	-1.47994	0.0382	0.441928	403330	P19100	14:123773105-123779533	CYP17A1	Steroid 17-alpha-hydroxylase/17,20 lyase [Source:UniProtKB/Swiss-Prot;Acc:P19100]
XLOC_010131	14:124874689-124925432	ENSSSCG00000010607|ENSSSCG00000021131	1.16245	0.147297	-2.98037	0.01405	0.273731	-|-	F1S5P1,I3LJA8|I3LUH8	14:124879142-124925432|14:124874690-124878749	-|-	-|-
XLOC_010183	14:142500501-142570642	ENSSSCG00000010698	11.4569	2.95954	-1.95277	0.03945	0.44972	-	K7GLJ1,K7GPH9,F1SEH9,K7GSU8,K7GNM6,K7GNJ9,K7GKI2,K7GT32,K7GK89,K7GQY0	14:142500502-142570296	FGFR2	fibroblast growth factor receptor 2 [Source:HGNC Symbol;Acc:HGNC:3689]
XLOC_010204	14:146931595-147045431	ENSSSCG00000010746	11.4885	2.85886	-2.00668	0.01195	0.252971	100157228	F1SDM3	14:146937523-147045431	ADAM12	ADAM metallopeptidase domain 12 [Source:HGNC Symbol;Acc:HGNC:190]
XLOC_010246	14:3389697-3402250	-	1.26718	0.241212	-2.39325	0.0004	0.0238375	-	-	-	-	-
XLOC_010253	14:7428422-7429630	-	0.788378	0	-inf	0.00015	0.0115208	-	-	-	-	-
XLOC_010304	14:25504175-25504602	-	5.66978	0	-inf	5e-05	0.00483523	-	-	-	-	-
XLOC_010344	14:41002974-41003595	-	17.8091	5.09187	-1.80635	0.02015	0.334393	-	-	-	-	-
XLOC_010553	14:118860091-118860358	-	146.771	14.3897	-3.35046	0.01125	0.245229	-	-	-	-	-
XLOC_010588	14:131815858-131818327	-	1.08387	0	-inf	5e-05	0.00483523	-	-	-	-	-
XLOC_010633	15:90395-102494	ENSSSCG00000023716	63.0011	3.84703	-4.03356	5e-05	0.00483523	106504114	I3L7U2	15:90396-102494	-	-
XLOC_010673	15:28424280-28468031	ENSSSCG00000029304	1.90581	0.333393	-2.51511	0.0108	0.238598	100620912	I3LJN3	15:28424281-28468031	STEAP3	STEAP family member 3, metalloreductase [Source:HGNC Symbol;Acc:HGNC:24592]
XLOC_010691	15:36045427-36093802	ENSSSCG00000015738	5.6612	0.571193	-3.30906	0.0313	0.408183	-	F1RXW9	15:36045463-36051320	-	-
XLOC_010720	15:44674457-44693049	-	13.6633	1.39546	-3.29149	0.0035	0.118382	-	-	-	-	-
XLOC_010733	15:52280626-52300426	ENSSSCG00000015783	9.56593	1.67246	-2.51593	0.00365	0.120393	-	F1RSZ5	15:52291090-52300426	CASP3	caspase 3, apoptosis-related cysteine peptidase [Source:HGNC Symbol;Acc:HGNC:1504]
XLOC_010758	15:59480285-59487306	ENSSSCG00000015835	7.15898	0.493772	-3.85784	0.00065	0.0342296	100525894	F1RX75	15:59482758-59487306	DUSP26	dual specificity phosphatase 26 (putative) [Source:HGNC Symbol;Acc:HGNC:28161]
XLOC_010797	15:70775973-70946583	ENSSSCG00000015872	4.08501	1.57144	-1.37825	0.02965	0.399243	397348	F1RPU0	15:70811286-70946574	GPD2	glycerol-3-phosphate dehydrogenase 2 (mitochondrial) [Source:HGNC Symbol;Acc:HGNC:4456]
XLOC_010798	15:71188242-71214563	ENSSSCG00000029753	15.8728	0.82531	-4.26548	0.00035	0.0217727	100627882	I3L9D9	15:71188248-71214563	CYTIP	cytohesin 1 interacting protein [Source:HGNC Symbol;Acc:HGNC:9506]
XLOC_010803	15:73001526-73025734	ENSSSCG00000015879	233.163	38.0902	-2.61384	0.00485	0.145125	100157537	F1RPT4	15:73001694-73025731	DAPL1	-
XLOC_010839	15:84128613-84365489	ENSSSCG00000015922	1.02734	0.0569879	-4.17212	0.04625	0.475631	-	F1S1W7	15:84270149-84301280	CERS6	ceramide synthase 6 [Source:HGNC Symbol;Acc:HGNC:23826]
XLOC_010862	15:87830504-87901446	ENSSSCG00000015955	8.18962	2.51874	-1.7011	0.02895	0.397792	-	I3LEE5,F1S081,K7GT68	15:87830505-87900014	ITGA6	integrin, alpha 6 [Source:HGNC Symbol;Acc:HGNC:6142]
XLOC_010911	15:101580813-101720799	ENSSSCG00000016027	35.5607	13.1995	-1.4298	0.0163	0.29895	397285	K7GMP6,F1RYJ4,K7GPM1,K7GT59,K7GS65	15:101580814-101720783	ITGAV	integrin alpha-V precursor [Source:RefSeq peptide;Acc:NP_001077401]
XLOC_010946	15:112001007-112007029	ENSSSCG00000023076	1.60634	0.159821	-3.32925	0.0485	0.484703	-	I3LVR4	15:112001008-112007029	-	-
XLOC_010992	15:117425884-117597333	ENSSSCG00000016113	5.66716	1.7314	-1.71068	0.0093	0.220086	100127483	K7GKP9,K7GR31,F1SI16,K7GQF4	15:117425964-117597333	BMPR2	-
XLOC_011010	15:121241551-121243458	-	3.468	0.396649	-3.12817	0.03095	0.407366	-	-	-	-	-
XLOC_011011	15:121305653-121474753	ENSSSCG00000016131	1.50237	0.47606	-1.65802	0.0405	0.453814	100518044	F1SHD2	15:121306038-121474753	ADAM23	ADAM metallopeptidase domain 23 [Source:HGNC Symbol;Acc:HGNC:202]
XLOC_011051	15:133275195-133317159	ENSSSCG00000016183	10.2465	0.991336	-3.36962	0.0244	0.369473	100124654	F1SS05	15:133283961-133285230	-	-
XLOC_011056	15:133452328-133456736	ENSSSCG00000025058	0.71121	0.0642578	-3.46833	0.0259	0.37871	-	I3L8L4	15:133452329-133456736	-	natural resistance-associated macrophage protein 1 [Source:RefSeq peptide;Acc:NP_998986]
XLOC_011088	15:138615910-138619068	ENSSSCG00000016222	4.83243	1.31421	-1.87855	0.01285	0.262616	-	F1SR74	15:138616540-138617052	KCNE4	potassium channel, voltage gated subfamily E regulatory beta subunit 4 [Source:HGNC Symbol;Acc:HGNC:6244]
XLOC_011137	15:147606480-147670776	ENSSSCG00000016298	3.81216	1.24469	-1.61482	0.02215	0.355919	-	F1SM44	15:147606612-147668699	INPP5D	inositol polyphosphate-5-phosphatase D [Source:HGNC Symbol;Acc:HGNC:6079]
XLOC_011154	15:149244056-149245019	-	9.47871	2.24243	-2.07963	0.0124	0.257376	-	-	-	-	-
XLOC_011233	15:7945354-7980509	ENSSSCG00000021343	5.40641	1.93951	-1.47898	0.02665	0.383353	100739669	I3LAN0	15:7946301-7980509	ZEB2	zinc finger E-box binding homeobox 2 [Source:HGNC Symbol;Acc:HGNC:14881]
XLOC_011239	15:9609577-9821863	ENSSSCG00000015673	1.20584	0.252024	-2.25841	0.0049	0.146005	100520985	F1S0H1	15:9609578-9821863	KYNU	kynureninase [Source:HGNC Symbol;Acc:HGNC:6469]
XLOC_011243	15:16061762-16096821	ENSSSCG00000024023	109.039	15.9392	-2.7742	0.00345	0.117063	100624677	I3L810	15:16061798-16096556	HNMT	-
XLOC_011260	15:28311837-28313309	ENSSSCG00000015717	1.87829	0	-inf	5e-05	0.00483523	100738874	F1RY08	15:28311838-28313309	C1QL2	complement component 1, q subcomponent-like 2 [Source:HGNC Symbol;Acc:HGNC:24181]
XLOC_011305	15:51972057-52015184	ENSSSCG00000015781	5.9922	2.2595	-1.40708	0.0371	0.434638	-	F1RSZ8	15:51972058-52015097	-	-
XLOC_011349	15:59866006-60198513	ENSSSCG00000015839|ENSSSCG00000025008	23.2797	0.554432	-5.39192	5e-05	0.00483523	-|-	F1RX71|I3L784	15:60061821-60150637|15:59917447-60041096	-|NRG1	-|neuregulin 1 [Source:HGNC Symbol;Acc:HGNC:7997]
XLOC_011363	15:62897182-62905850	-	6.92158	0.576732	-3.58513	5e-05	0.00483523	-	-	-	-	-
XLOC_011365	15:63426229-63437375	ENSSSCG00000022797	3.45602	1.27529	-1.43829	0.021	0.344468	100515931	I3L6I5	15:63426230-63437375	PPP1R3B	protein phosphatase 1, regulatory subunit 3B [Source:HGNC Symbol;Acc:HGNC:14942]
XLOC_011404	15:76152547-76240097	ENSSSCG00000015894	9.75784	0.302209	-5.01294	0.0135	0.268423	397492	P22411,K7GPA1,K7GMK0	15:76152548-76235571	DPP4	Dipeptidyl peptidase 4 Dipeptidyl peptidase 4 membrane form Dipeptidyl peptidase 4 soluble form [Source:UniProtKB/Swiss-Prot;Acc:P22411]
XLOC_011431	15:83412045-83826916	ENSSSCG00000022496|ENSSSCG00000023421	8.24102	2.04646	-2.00969	0.0321	0.411154	-|-	I3LF98|I3LIX4	15:83630100-83667197|15:83412046-83526943	-|-	-|-
XLOC_011439	15:84798247-84823208	ENSSSCG00000029042	1.34522	0.298132	-2.17382	0.0098	0.226872	100519223,100519057	I3LNS4	15:84798248-84823208	-	-
XLOC_011483	15:96360075-96377896	-	0.892458	0.0641624	-3.79798	0.0128	0.262604	-	-	-	-	-
XLOC_011491	15:101553937-101566282	ENSSSCG00000030776	71.5138	6.86867	-3.38012	0.00035	0.0217727	-	K7GNS5	15:101553938-101566282	CH242-9E10.1	-
XLOC_011499	15:104121478-104342984	ENSSSCG00000016035	224.187	28.3623	-2.98265	0.0055	0.157275	-	F1RXW0	15:104122882-104175081	COL5A2	collagen, type V, alpha 2 [Source:HGNC Symbol;Acc:HGNC:2210]
XLOC_011511	15:106492810-106535886	ENSSSCG00000016053	1.73055	0.475375	-1.86409	0.0456	0.472317	100515587	F1SN50	15:106492811-106519614	NEMP2	nuclear envelope integral membrane protein 2 [Source:HGNC Symbol;Acc:HGNC:33700]
XLOC_011518	15:111026271-111052824	ENSSSCG00000016067	10.3773	2.24322	-2.20979	0.00015	0.0115208	100153033	F1SN17	15:111029414-111052824	STK17B	serine/threonine kinase 17b [Source:HGNC Symbol;Acc:HGNC:11396]
XLOC_011520	15:111160771-111493355	ENSSSCG00000016068	0.903449	0.172075	-2.3924	0.02005	0.333513	-	F1SN16	15:111160772-111337462	-	E3 ubiquitin-protein ligase HECW2 [Source:RefSeq peptide;Acc:NP_001185853]
XLOC_011557	15:118230642-118297755	ENSSSCG00000016119	5.07466	1.89956	-1.41765	0.0081	0.205152	-	F1SHE5	15:118236247-118297755	RAPH1	Ras association (RalGDS/AF-6) and pleckstrin homology domains 1 [Source:HGNC Symbol;Acc:HGNC:14436]
XLOC_011562	15:120665357-120680998	-	3.82362	0.923877	-2.04917	0.0026	0.0962	-	-	-	-	-
XLOC_011563	15:120723006-120727611	ENSSSCG00000023713	2.58653	0	-inf	0.0027	0.0983604	-	I3LAW7	15:120723007-120727611	-	-
XLOC_011590	15:130357872-130430886	ENSSSCG00000016174	35.6365	5.95525	-2.58112	0.0005	0.0279934	397620	F1SS24	15:130357873-130430503	FN1	fibronectin 1 [Source:HGNC Symbol;Acc:HGNC:3778]
XLOC_011648	15:139929215-140211055	ENSSSCG00000016237	2.04153	0.631602	-1.69256	0.01925	0.32659	100512141	F1SNP7	15:139929261-140112107	-	-
XLOC_011662	15:142743802-142774381	ENSSSCG00000016248	19.8548	8.64186	-1.20008	0.0356	0.426939	-	F1SNM7	15:142743868-142774381	AGFG1	ArfGAP with FG repeats 1 [Source:HGNC Symbol;Acc:HGNC:5175]
XLOC_011691	15:147333686-147378445	ENSSSCG00000016295	0.737802	0.167118	-2.14236	0.03445	0.421463	100153801	F1SM48	15:147334432-147378445	NGEF	neuronal guanine nucleotide exchange factor [Source:HGNC Symbol;Acc:HGNC:7807]
XLOC_011711	15:149119650-149243845	ENSSSCG00000020649|ENSSSCG00000023942	448.886	55.4197	-3.01788	0.0139	0.273564	100620419|100620419,100514255	F2Z5S2|F2Z5S2	15:149242876-149243454|15:149122784-149123362	-|ARL4C	-|-
XLOC_011760	15:157132376-157151758	ENSSSCG00000016396	73.51	6.21756	-3.56352	5e-05	0.00483523	100286870,100738892	F1SHX1	15:157132380-157151740	TNFAIP6	-
XLOC_011765	15:82826-84454	-	27.8351	3.08715	-3.17256	0.0001	0.00857863	-	-	-	-	-
XLOC_011816	15:28303118-28303584	-	4.25172	0.145962	-4.86438	0.04795	0.482334	-	-	-	-	-
XLOC_011833	15:44565415-44565688	-	360.645	60.6855	-2.57115	0.0169	0.303416	-	-	-	-	-
XLOC_011888	15:62639398-62639646	-	268.317	13.6245	-4.29967	0.00595	0.165689	-	-	-	-	-
XLOC_011918	15:76946103-76946406	-	30.4757	0	-inf	5e-05	0.00483523	-	-	-	-	-
XLOC_011951	15:93467033-93467305	-	161.208	7.712	-4.38567	0.0151	0.285558	-	-	-	-	-
XLOC_011970	15:104345471-104345796	-	32.6671	2.36486	-3.78801	0.02145	0.34889	-	-	-	-	-
XLOC_011995	15:108058715-108059216	-	1.36328	0	-inf	0.0005	0.0279934	-	-	-	-	-
XLOC_011999	15:111149398-111149630	-	34.2344	0	-inf	0.00215	0.0851792	-	-	-	-	-
XLOC_012057	15:134511606-134512005	-	19.9905	0.88397	-4.49917	0.0317	0.409184	-	-	-	-	-
XLOC_012062	15:138194951-138195201	-	326.262	45.1889	-2.85199	0.0252	0.373051	-	-	-	-	-
XLOC_012067	15:140845978-140847457	-	0.824292	0	-inf	5e-05	0.00483523	-	-	-	-	-
XLOC_012088	15:144835438-144837023	-	1.9874	0.162098	-3.61594	0.01645	0.300289	-	-	-	-	-
XLOC_012153	16:21107407-21337349	ENSSSCG00000016824	11.5838	2.85279	-2.02167	0.00035	0.0217727	100145886	F1SP04	16:21107618-21337349	RAI14	ankycorbin [Source:RefSeq peptide;Acc:NP_001121934]
XLOC_012160	16:22278425-22314445	ENSSSCG00000016832	8.97964	0.853457	-3.39527	5e-05	0.00483523	100271930	F1SNC0,K7GLT0,K7GLC0	16:22282647-22313804	IL7R	interleukin 7 receptor [Source:HGNC Symbol;Acc:HGNC:6024]
XLOC_012191	16:31878943-32060032	ENSSSCG00000016882	4.85626	1.35835	-1.83799	0.00425	0.132191	100511108	F1SMF8	16:31878944-32060032	PARP8	poly (ADP-ribose) polymerase family, member 8 [Source:HGNC Symbol;Acc:HGNC:26124]
XLOC_012201	16:36365988-36376149	ENSSSCG00000016902	2.96588	0.294273	-3.33323	0.00875	0.214466	100620361,100233183	F1SLN5	16:36365989-36376137	GZMA	-
XLOC_012256	16:51499064-51507622	ENSSSCG00000027784	1.3431	0.20152	-2.73657	0.026	0.37882	-	I3L627	16:51499065-51507622	-	MARVEL domain containing 2 [Source:RefSeq peptide;Acc:NP_001230877]
XLOC_012286	16:58038025-58083454	ENSSSCG00000017006	11.1855	1.24601	-3.16625	0.00015	0.0115208	100511843	F1RRX4	16:58039300-58082197	LCP2	lymphocyte cytosolic protein 2 (SH2 domain containing leukocyte protein of 76kDa) [Source:HGNC Symbol;Acc:HGNC:6529]
XLOC_012322	16:71570378-71671160	ENSSSCG00000017052	4.7113	1.97749	-1.25246	0.0266	0.383353	100521528	F1RQF1	16:71570441-71669557	ADAM19	ADAM metallopeptidase domain 19 [Source:HGNC Symbol;Acc:HGNC:197]
XLOC_012366	16:86015928-86038151	ENSSSCG00000021251	8.90095	2.11453	-2.07362	0.0067	0.179525	-	I3L7H3	16:86015929-86038151	SLC12A7	solute carrier family 12 (potassium/chloride transporter), member 7 [Source:HGNC Symbol;Acc:HGNC:10915]
XLOC_012367	16:86105203-86242198	ENSSSCG00000017122|ENSSSCG00000028070	8.17406	0.407998	-4.32442	5e-05	0.00483523	100522225|-	F1S023,K7GNB0|K7GR10,I3LPG1	16:86160232-86165995|16:86105823-86131331	CH242-128B1.2|CH242-128B1.1	-|-
XLOC_012369	16:86105203-86242198	-	2.81041	0.0451574	-5.95967	0.0244	0.369473	-	-	-	-	-
XLOC_012370	16:86105203-86242198	-	3.20005	0.291879	-3.45465	0.0463	0.475631	-	-	-	-	-
XLOC_012371	16:86348136-86492659	-	2.46851	0.0576559	-5.42003	0.04605	0.474208	-	-	-	-	-
XLOC_012372	16:86348136-86492659	ENSSSCG00000020913	3.75129	0	-inf	0.04705	0.47986	-	I3LFV2	16:86462056-86467847	-	-
XLOC_012386	16:4003964-4065442	ENSSSCG00000028803	2.05573	0.209959	-3.29147	0.01165	0.249099	100518519	I3LMX1	16:4003965-4065442	-	-
XLOC_012389	16:4445056-4611009	ENSSSCG00000016784	9.92948	3.35315	-1.5662	0.0066	0.178418	100624458	F1SRN1	16:4446886-4611009	ANKH	ANKH inorganic pyrophosphate transport regulator [Source:HGNC Symbol;Acc:HGNC:15492]
XLOC_012397	16:6351994-6590963	ENSSSCG00000016794	7.63282	2.32028	-1.71792	0.00165	0.0709167	396902	F1SRM1	16:6351995-6492682	MYO10	myosin X [Source:HGNC Symbol;Acc:HGNC:7593]
XLOC_012410	16:18544602-18667159	ENSSSCG00000016809	10.0915	3.02497	-1.73815	0.0165	0.300289	100524961	F1SP38	16:18544603-18667159	DROSHA	drosha, ribonuclease type III [Source:HGNC Symbol;Acc:HGNC:17904]
XLOC_012416	16:19675891-19682676	-	11.84	1.25766	-3.23485	5e-05	0.00483523	-	-	-	-	-
XLOC_012422	16:20792524-20820052	ENSSSCG00000016823	3.24841	0.178963	-4.182	0.0007	0.0363232	100270814	B9UJD6	16:20792525-20819543	-	-
XLOC_012445	16:25516198-25621596	ENSSSCG00000016855	9.17507	1.51593	-2.59751	0.00165	0.0709167	100520112	F1SN73,K7GT11,K7GLT9,K7GKR5	16:25516199-25621534	FYB	FYN binding protein [Source:HGNC Symbol;Acc:HGNC:4036]
XLOC_012446	16:25721587-25907491	ENSSSCG00000016857	68.0402	18.2999	-1.89455	0.00425	0.132191	100519746	F1SMJ4	16:25736189-25907473	DAB2	Dab, mitogen-responsive phosphoprotein, homolog 2 (Drosophila) [Source:HGNC Symbol;Acc:HGNC:2662]
XLOC_012478	16:35128771-35423306	ENSSSCG00000016894	6.14098	2.03466	-1.59368	0.0277	0.391208	-	F1SLQ2	16:35278525-35417710	ARL15	ADP-ribosylation factor-like 15 [Source:HGNC Symbol;Acc:HGNC:25945]
XLOC_012483	16:36287589-36329478	ENSSSCG00000016900	207.249	5.36389	-5.27194	5e-05	0.00483523	-	F1SLP7	16:36289025-36296446	-	-
XLOC_012502	16:40067322-40073386	ENSSSCG00000016925	16.406	5.76192	-1.5096	0.02645	0.382285	397251	F1SLJ2	16:40067323-40073386	PLK2	polo-like kinase 2 [Source:HGNC Symbol;Acc:HGNC:19699]
XLOC_012504	16:40637278-40654842	ENSSSCG00000016929	1.06382	0.266821	-1.99531	0.0125	0.258694	100037967	F1SKX3	16:40637279-40654842	PDE4D	phosphodiesterase 4D, cAMP-specific [Source:HGNC Symbol;Acc:HGNC:8783]
XLOC_012517	16:46987102-47281159	ENSSSCG00000016943	2.85356	1.21627	-1.2303	0.04745	0.481593	100513765	F1SKU0	16:46990247-47281159	ADAMTS6	ADAM metallopeptidase with thrombospondin type 1 motif, 6 [Source:HGNC Symbol;Acc:HGNC:222]
XLOC_012565	16:56561270-56654490	ENSSSCG00000023307	6.39537	1.03642	-2.62542	0.01815	0.315217	100523218	I3LGM0	16:56561271-56644745	FBXW11	F-box and WD repeat domain containing 11 [Source:HGNC Symbol;Acc:HGNC:13607]
XLOC_012567	16:56654630-56743147	ENSSSCG00000022478	5.54047	1.13739	-2.28428	0.0134	0.267184	-	I3LBD5	16:56725289-56743147	STK10	serine/threonine kinase 10 [Source:HGNC Symbol;Acc:HGNC:11388]
XLOC_012575	16:58215143-58276383	ENSSSCG00000017008	1.84398	0.199732	-3.20668	0.01285	0.262616	100512021	F1RR96	16:58215144-58276383	DOCK2	dedicator of cytokinesis 2 [Source:HGNC Symbol;Acc:HGNC:2988]
XLOC_012614	16:71983762-72032617	ENSSSCG00000028875	4.76021	0.170599	-4.80234	0.0361	0.430027	100522045	F1RQD6	16:71986890-72008135	HAVCR2	hepatitis A virus cellular receptor 2 [Source:HGNC Symbol;Acc:HGNC:18437]
XLOC_012623	16:74514317-74516983	-	0.837413	0	-inf	5e-05	0.00483523	-	-	-	-	-
XLOC_012637	16:77974388-77987649	ENSSSCG00000017087	44.7984	16.4316	-1.44697	0.01925	0.32659	100515283	F1S0V6	16:77974389-77987649	GM2A	GM2 ganglioside activator [Source:HGNC Symbol;Acc:HGNC:4367]
XLOC_012648	16:81668801-81726541	ENSSSCG00000017103	27.7704	3.17402	-3.12917	0.023	0.361125	-	F1S0R8	16:81668802-81694768	SRD5A1	steroid-5-alpha-reductase, alpha polypeptide 1 (3-oxo-5 alpha-steroid delta 4-dehydrogenase alpha 1) [Source:HGNC Symbol;Acc:HGNC:11284]
XLOC_012655	16:83510134-83511684	ENSSSCG00000017110	0.700328	0	-inf	0.04415	0.464996	-	F1S045	16:83510135-83511684	-	-
XLOC_012667	16:86756456-86841200	ENSSSCG00000017124	2.21078	0.834538	-1.4055	0.0442	0.465292	100523704	I3LHM2,F1S013	16:86762462-86840982	-	-
XLOC_012714	16:24175839-24180323	-	2.23896	0.184717	-3.59944	0.0038	0.123239	-	-	-	-	-
XLOC_012765	16:43072273-43072771	-	8.76958	1.77466	-2.30496	0.02625	0.380428	-	-	-	-	-
XLOC_012868	17:3407244-3578291	ENSSSCG00000021988	29.402	12.0257	-1.2898	0.0174	0.307974	106504082	I3LS83	17:3407245-3524008	TUSC3	tumor suppressor candidate 3 [Source:HGNC Symbol;Acc:HGNC:30242]
XLOC_012871	17:4029179-4030899	ENSSSCG00000023088	3.14578	0.372398	-3.0785	0.0257	0.376821	-	I3L8G2	17:4029180-4030899	-	-
XLOC_012908	17:15800453-15870087	ENSSSCG00000007045	3.23059	0.326484	-3.30672	0.0001	0.00857863	397154	Q6IYD4	17:15800454-15870087	CHGB	Sus scrofa chromogranin B (secretogranin 1) (CHGB), mRNA. [Source:RefSeq mRNA;Acc:NM_214081]
XLOC_012912	17:16010186-16021981	ENSSSCG00000007049	21.2659	6.96067	-1.61124	0.0441	0.464929	-	F1SBL9	17:16010187-16021981	LRRN4	leucine rich repeat neuronal 4 [Source:HGNC Symbol;Acc:HGNC:16208]
XLOC_012923	17:20241951-20770716	ENSSSCG00000007058	1.6803	0.528622	-1.66841	0.0161	0.296818	100516581	F1SBL0	17:20571279-20770049	PLCB4	phospholipase C, beta 4 [Source:HGNC Symbol;Acc:HGNC:9059]
XLOC_012985	17:35991331-35992251	ENSSSCG00000023107	6.24936	0.85472	-2.87018	0.01665	0.302243	-	I3LFG7	17:35991332-35992251	-	-
XLOC_013050	17:40638717-40667247	ENSSSCG00000007240	4.76844	1.17853	-2.01653	0.02205	0.35512	-	F1S525	17:40656380-40667247	-	-
XLOC_013051	17:40668201-40680328	-	10.6034	3.21969	-1.71954	0.04065	0.454455	-	-	-	-	-
XLOC_013079	17:43299400-43309012	ENSSSCG00000022099	26.0417	6.13069	-2.0867	0.00125	0.0571909	100152247	I3LVN2	17:43299840-43308847	TP53INP2	tumor protein p53 inducible nuclear protein 2 [Source:HGNC Symbol;Acc:HGNC:16104]
XLOC_013084	17:43729645-43734535	ENSSSCG00000026585	10.0561	3.57659	-1.49141	0.0219	0.353239	654289	I3LQA4	17:43729704-43734474	PROCR	-
XLOC_013119	17:46951384-47076190	ENSSSCG00000007345	5.40489	0.77401	-2.80384	0.00175	0.0737252	-	I3LRQ6,F1SDX4	17:46951669-47076190	-	-
XLOC_013170	17:53819787-53827092	ENSSSCG00000007436	11.9767	2.52661	-2.24496	0.00165	0.0709167	654325	F1SC56	17:53819788-53827092	MMP9	-
XLOC_013199	17:57943684-58043319	-	26.0425	1.35676	-4.26263	0.0366	0.431154	-	-	-	-	-
XLOC_013201	17:58355132-58554206	ENSSSCG00000007469	12.7523	3.25865	-1.96841	0.0006	0.0319925	396667	K7GL69,A5GHK9,K7GLX3	17:58355133-58474149	PTPN1	tyrosine-protein phosphatase non-receptor type 1 [Source:RefSeq peptide;Acc:NP_001106906]
XLOC_013203	17:58582919-58658431	ENSSSCG00000027206	14.6907	1.47632	-3.31482	5e-05	0.00483523	100151957	A5GHK8	17:58583134-58653888	PARD6B	uncharacterized protein LOC100151957 [Source:RefSeq peptide;Acc:NP_001124004]
XLOC_013207	17:59183327-59349173	ENSSSCG00000030987	1.52712	0.0309939	-5.62269	0.00345	0.117063	-	-	17:59299400-59300585	CH242-277I8.4	-
XLOC_013225	17:64102671-64143832	ENSSSCG00000007495	5.94325	0.273647	-4.44087	0.0001	0.00857863	100126293	-	17:64102710-64142562	CASS4	Cas scaffolding protein family member 4 [Source:HGNC Symbol;Acc:HGNC:15878]
XLOC_013272	17:4092190-4191630	ENSSSCG00000006979	28.0453	7.81257	-1.84389	0.0061	0.168324	100511665	K7GNV7,F1SEU0,K7GQC4	17:4110396-4191497	MSR1	macrophage scavenger receptor 1 [Source:HGNC Symbol;Acc:HGNC:7376]
XLOC_013346	17:28115505-28417231	ENSSSCG00000007080	7.17791	3.20395	-1.16371	0.0426	0.458346	-	I3LQ03,F1SBI9	17:28115797-28384383	-	-
XLOC_013377	17:34949430-34988723	ENSSSCG00000007133	29.8035	13.4068	-1.15252	0.04575	0.472491	100154828	F1SAS2	17:34950891-34988723	ACSS1	acyl-CoA synthetase short-chain family member 1 [Source:HGNC Symbol;Acc:HGNC:16091]
XLOC_013385	17:35882698-35916001	ENSSSCG00000007140	11.7803	2.42012	-2.28322	5e-05	0.00483523	-	F1S8C9	17:35882699-35915987	SMOX	spermine oxidase [Source:HGNC Symbol;Acc:HGNC:15862]
XLOC_013393	17:36381688-36619079	ENSSSCG00000007153	3.6658	0.652734	-2.48956	0.01405	0.273731	100101470	K7GK96,K7GNE0,F1S8B6	17:36381690-36619079	ATRN	attractin [Source:HGNC Symbol;Acc:HGNC:885]
XLOC_013408	17:37571309-37578936	-	9.10852	0.807985	-3.49482	0.0035	0.118382	-	-	-	-	-
XLOC_013410	17:37610107-37616899	ENSSSCG00000026043	16.0542	1.53397	-3.38761	0.0003	0.0195183	-	I3LBA6	17:37610108-37611677	TGM3	transglutaminase 3 [Source:HGNC Symbol;Acc:HGNC:11779]
XLOC_013464	17:42387886-42388533	ENSSSCG00000030702	1.36085	0	-inf	0.02525	0.373051	-	I3LHP1	17:42387887-42388533	-	-
XLOC_013502	17:45773786-45783071	ENSSSCG00000007330	55.1508	13.0466	-2.07971	0.00075	0.0383564	100513892	F1SEM2	17:45773787-45783071	-	-
XLOC_013514	17:47091149-47111188	ENSSSCG00000007347	7.44376	3.26335	-1.18968	0.03145	0.408735	100737724	F1SDX3	17:47091150-47111188	-	-
XLOC_013515	17:48698192-48865690	ENSSSCG00000030898	16.9054	3.0593	-2.46621	0.007	0.185461	100518227	K7GRV4	17:48698399-48701183	MAFB	v-maf avian musculoaponeurotic fibrosarcoma oncogene homolog B [Source:HGNC Symbol;Acc:HGNC:6408]
XLOC_013528	17:52188858-52195152	ENSSSCG00000007372	9.90343	3.80658	-1.37943	0.03625	0.430368	100158013	B2LYG4	17:52190681-52194861	FITM2	Fat storage-inducing transmembrane protein 2 [Source:UniProtKB/Swiss-Prot;Acc:B2LYG4]
XLOC_013536	17:53182911-53185808	ENSSSCG00000022258	64.0195	0.69054	-6.53464	0.0023	0.0881667	100512873	I3LS74	17:53182912-53185808	-	-
XLOC_013556	17:53738521-53741113	ENSSSCG00000007435	188.61	49.3431	-1.93449	0.00375	0.122552	-	F1SC57	17:53738525-53740290	PLTP	phospholipid transfer protein [Source:HGNC Symbol;Acc:HGNC:9093]
XLOC_013573	17:56818195-56862600	ENSSSCG00000024207	2.43207	0.23571	-3.3671	0.00525	0.152796	-	I3LR23	17:56828958-56862600	PREX1	phosphatidylinositol-3,4,5-trisphosphate-dependent Rac exchange factor 1 [Source:HGNC Symbol;Acc:HGNC:32594]
XLOC_013587	17:58355132-58554206	ENSSSCG00000007470	5.7932	0.438584	-3.72344	0.00385	0.124292	100153156	I3LNH2,F1SBD9	17:58476081-58509813	FAM65C	family with sequence similarity 65, member C [Source:HGNC Symbol;Acc:HGNC:16168]
XLOC_013592	17:59183327-59349173	ENSSSCG00000007477	4.93939	0.615205	-3.0052	5e-05	0.00483523	100134969	A5GFS5,A5GFS6	17:59183330-59332006	NFATC2	nuclear factor of activated T-cells, cytoplasmic, calcineurin-dependent 2 [Source:HGNC Symbol;Acc:HGNC:7776]
XLOC_013619	17:65159855-65214998	ENSSSCG00000007509	30.4285	10.6189	-1.51879	0.0122	0.256477	100144523	A5GFP6	17:65159876-65214347	PMEPA1	prostate transmembrane protein, androgen induced 1 [Source:HGNC Symbol;Acc:HGNC:14107]
XLOC_013734	17:37595549-37597591	-	0.801459	0.0163668	-5.61378	0.04165	0.457293	-	-	-	-	-
XLOC_013829	17:59119368-59120150	-	0.89776	0	-inf	0.0006	0.0319925	-	-	-	-	-
XLOC_013888	18:6613894-6620848	ENSSSCG00000027826	19.3597	6.12909	-1.65932	0.00225	0.0873517	-	I3LLP5	18:6618395-6619630	GIMAP4	GTPase, IMAP family member 4 [Source:HGNC Symbol;Acc:HGNC:21872]
XLOC_013892	18:6871795-6875491	ENSSSCG00000016451	54.8609	12.643	-2.11744	0.00425	0.132191	100519177	F1SSJ2	18:6872941-6875292	GIMAP1	GTPase, IMAP family member 1 [Source:HGNC Symbol;Acc:HGNC:23237]
XLOC_013923	18:10087526-10171185	ENSSSCG00000016501	3.14303	0.804996	-1.9651	0.00205	0.0821351	100515632	F1SRP4	18:10087542-10164670	KDM7A	lysine (K)-specific demethylase 7A [Source:HGNC Symbol;Acc:HGNC:22224]
XLOC_013957	18:15487572-15615037	ENSSSCG00000016539	332.36	53.708	-2.62954	0.00045	0.025875	396816	P80276	18:15596721-15615030	AKR1B1	-
XLOC_013972	18:19612234-19629874	ENSSSCG00000027131	12.1812	3.51264	-1.79404	0.00195	0.0793236	100739403	I3LF85	18:19612235-19629615	-	-
XLOC_013974	18:19862719-19977684	ENSSSCG00000016564	30.2446	12.6622	-1.25615	0.02525	0.373051	100626356	F1SMR7	18:19862732-19973521	UBE2H	ubiquitin-conjugating enzyme E2H [Source:HGNC Symbol;Acc:HGNC:12484]
XLOC_014024	18:32208622-32290046	ENSSSCG00000016637	9.11591	0.715577	-3.67121	0.0001	0.00857863	100517204	I3LC19,F1SJC5	18:32208623-32286915	TFEC	transcription factor EC [Source:HGNC Symbol;Acc:HGNC:11754]
XLOC_014042	18:40535911-40984222	ENSSSCG00000016656	4.9222	2.01411	-1.28916	0.03065	0.405774	100522109	F1SIM4	18:40536750-40984215	ELMO1	engulfment and cell motility 1 [Source:HGNC Symbol;Acc:HGNC:16286]
XLOC_014051	18:42632070-42735218	ENSSSCG00000027063	8.33101	3.95074	-1.07637	0.03285	0.414768	-	I3LG81	18:42650213-42732527	DPY19L1	dpy-19-like 1 (C. elegans) [Source:HGNC Symbol;Acc:HGNC:22205]
XLOC_014102	18:54851503-54856012	ENSSSCG00000016729	6.70752	2.11109	-1.66779	0.04305	0.46094	-	F1ST75	18:54851504-54856012	IGFBP3	insulin-like growth factor binding protein 3 [Source:HGNC Symbol;Acc:HGNC:5472]
XLOC_014139	18:57993252-58013929	ENSSSCG00000021865	282.839	14.44	-4.29184	5e-05	0.00483523	397093	F1SSD8	18:57997858-58009109	INHBA	inhibin beta A chain precursor [Source:RefSeq peptide;Acc:NP_999193]
XLOC_014192	18:6629466-6644882	ENSSSCG00000027196	8.98131	3.80209	-1.24013	0.0298	0.400502	100518524	I3LU68	18:6629467-6635745	GIMAP6	GTPase, IMAP family member 6 [Source:HGNC Symbol;Acc:HGNC:21918]
XLOC_014195	18:6731368-6735656	ENSSSCG00000016449	1.46148	0.146035	-3.32304	0.0492	0.485722	100523477	F1SSJ4	18:6731369-6733669	GIMAP2	GTPase, IMAP family member 2 [Source:HGNC Symbol;Acc:HGNC:21789]
XLOC_014198	18:6875584-6878023	-	1.99032	0.151916	-3.71165	0.03625	0.430368	-	-	-	-	-
XLOC_014199	18:6893614-6907364	ENSSSCG00000016452	1.53	0.406874	-1.91087	0.01155	0.247458	100736760	F1SSJ1	18:6894511-6906676	GIMAP8	GTPase, IMAP family member 8 [Source:HGNC Symbol;Acc:HGNC:21792]
XLOC_014236	18:10051218-10057317	-	0.803791	0.0478644	-4.0698	0.00225	0.0873517	-	-	-	-	-
XLOC_014237	18:10223765-10394191	ENSSSCG00000016504	8.41184	1.84589	-2.1881	0.01235	0.257376	397112	K7GRR2,F1SR25,K7GLF8,K7GQN3	18:10223766-10394083	TBXAS1	thromboxane-A synthase [Source:RefSeq peptide;Acc:NP_999211]
XLOC_014258	18:14552481-14557663	ENSSSCG00000021377	0.869917	0	-inf	0.00135	0.0607215	-	I3LPY6	18:14552482-14557663	-	-
XLOC_014267	18:15410467-15435148	-	24.1145	2.86457	-3.07351	0.0001	0.00857863	-	-	-	-	-
XLOC_014269	18:15475639-15487293	-	53.148	0	-inf	0.00095	0.0461444	-	-	-	-	-
XLOC_014297	18:20747598-20760161	ENSSSCG00000016573	17.0038	2.43861	-2.80173	0.00015	0.0115208	100515633	F1SMP9	18:20747732-20760161	IRF5	interferon regulatory factor 5 [Source:HGNC Symbol;Acc:HGNC:6120]
XLOC_014300	18:20910830-20945201	ENSSSCG00000016581	59.1425	24.2532	-1.28602	0.02755	0.391126	397301	F1SMN1	18:20911133-20945201	CALU	calumenin [Source:HGNC Symbol;Acc:HGNC:1458]
XLOC_014340	18:33247369-33508051	ENSSSCG00000016638	23.7562	9.53768	-1.31659	0.0353	0.426344	100192442	F1SJC4	18:33266477-33453948	MDFIC	MyoD family inhibitor domain containing [Source:HGNC Symbol;Acc:HGNC:28870]
XLOC_014361	18:41468006-41476511	-	6.25689	1.77643	-1.81646	0.02565	0.376347	-	-	-	-	-
XLOC_014362	18:41556663-41835430	ENSSSCG00000022824	5.63841	1.76123	-1.67871	0.01475	0.281637	-	I3LTM7	18:41718971-41721608	-	-
XLOC_014383	18:46810670-46814429	ENSSSCG00000016679	29.2605	10.5545	-1.47109	0.0261	0.379029	-	F1SII1	18:46810848-46814429	-	-
XLOC_014384	18:46866115-47037087	ENSSSCG00000016680	15.8919	3.54399	-2.16484	0.0347	0.422094	-	F1SIH0	18:46871887-46909048	ZNRF2	zinc and ring finger 2, E3 ubiquitin protein ligase [Source:HGNC Symbol;Acc:HGNC:22316]
XLOC_014388	18:47381848-47459591	ENSSSCG00000016685	2.05119	0.381932	-2.42507	0.0347	0.422094	-	F1SIG6	18:47397851-47441699	WIPF3	WAS/WASL interacting protein family, member 3 [Source:HGNC Symbol;Acc:HGNC:22004]
XLOC_014389	18:47566104-47570667	ENSSSCG00000016686	25.212	6.43625	-1.96982	0.0099	0.228193	100513831	F1SIG5	18:47566197-47569773	PRR15	proline rich 15 [Source:HGNC Symbol;Acc:HGNC:22310]
XLOC_014390	18:47594692-47917557	ENSSSCG00000016687	3.11803	0.927339	-1.74946	0.01565	0.293255	100514933	F1SIG4	18:47596367-47715301	CHN2	chimerin 2 [Source:HGNC Symbol;Acc:HGNC:1944]
XLOC_014405	18:50838873-50917658	ENSSSCG00000016709	14.0942	5.1923	-1.44066	0.04795	0.482334	-	F2Z5P4	18:50840315-50858704	SNX10	sorting nexin 10 [Source:HGNC Symbol;Acc:HGNC:14974]
XLOC_014418	18:55155820-55160705	-	1511.78	14.825	-6.67207	0.0087	0.214466	-	-	-	-	-
XLOC_014437	18:56217451-56255521	ENSSSCG00000016758	18.8882	4.34811	-2.11902	0.00505	0.149014	-	F1SSF3	18:56219324-56255521	-	-
XLOC_014444	18:58606720-58613023	-	0.916083	0	-inf	5e-05	0.00483523	-	-	-	-	-
XLOC_014447	18:58827494-59574849	ENSSSCG00000016766|ENSSSCG00000016767|ENSSSCG00000020787	14.9816	3.96577	-1.91752	0.02295	0.360873	-|-|-	F1SSD6|F1SSC5|I3LG76	18:58829118-58829276|18:59562043-59574849|18:59557084-59557805	-|-|SUGCT	-|-|succinyl-CoA:glutarate-CoA transferase [Source:HGNC Symbol;Acc:HGNC:16001]
XLOC_014495	18:14609124-14610654	-	2.38619	0.144245	-4.04811	0.01025	0.23125	-	-	-	-	-
XLOC_014518	18:17777618-17777879	-	51.1015	0	-inf	5e-05	0.00483523	-	-	-	-	-
XLOC_014571	18:35899579-35899820	-	168.682	33.2412	-2.34326	0.04575	0.472491	-	-	-	-	-
XLOC_014572	18:36079309-36079747	-	3.29299	0	-inf	5e-05	0.00483523	-	-	-	-	-
XLOC_014577	18:38767955-38839283	-	65.0326	0	-inf	5e-05	0.00483523	-	-	-	-	-
XLOC_014578	18:39184403-39184685	-	65.8924	0	-inf	5e-05	0.00483523	-	-	-	-	-
XLOC_014602	18:46825500-46828508	-	3.77119	0.620309	-2.60396	0.0016	0.0698973	-	-	-	-	-
XLOC_014694	2:2815219-2874163	ENSSSCG00000012880	22.4809	5.11705	-2.13531	0.0013	0.0590972	-	F1RY68,K7GN50,K7GPM3	2:2815220-2874163	CPT1A	carnitine palmitoyltransferase 1A (liver) [Source:HGNC Symbol;Acc:HGNC:2328]
XLOC_014791	2:7354835-7364717	ENSSSCG00000013050	7.8076	3.2776	-1.25224	0.04025	0.453319	-	I3L7Z9,F1RPY5	2:7355161-7364707	MARK2	MAP/microtubule affinity-regulating kinase 2 [Source:HGNC Symbol;Acc:HGNC:3332]
XLOC_014802	2:8245286-8273083	ENSSSCG00000022404	36.0294	15.3257	-1.23322	0.017	0.303673	100144589	I3LB80	2:8265773-8273083	-	-
XLOC_014823	2:9524715-9563780	ENSSSCG00000021906	1.25324	0.434656	-1.52772	0.04995	0.489159	100521541	I3LEZ0	2:9524716-9563735	SYT7	synaptotagmin VII [Source:HGNC Symbol;Acc:HGNC:11514]
XLOC_014838	2:10905561-10927128	ENSSSCG00000013101	30.5226	10.0753	-1.59905	0.02195	0.353777	100525275	F1RIC5	2:10915161-10927118	-	-
XLOC_014840	2:11061347-11088412	ENSSSCG00000013119	10.1156	3.16736	-1.67523	0.0268	0.384471	100520886	F1RI88	2:11061501-11080872	STX3	syntaxin 3 [Source:HGNC Symbol;Acc:HGNC:11438]
XLOC_014854	2:11807281-11850646	ENSSSCG00000013144	11.1709	1.57466	-2.82663	0.04075	0.454856	100516953	F1RMG2	2:11807282-11811580	MPEG1	-
XLOC_014921	2:16421196-16452507	ENSSSCG00000013237	57.105	16.8117	-1.76416	0.0094	0.220978	414912	K7GPR9,K7GRN1,F1SID6	2:16421197-16452507	SPI1	-
XLOC_014946	2:17962596-17968334	ENSSSCG00000013266	2.36685	0.572803	-2.04686	0.0457	0.472491	100517024	F1SI95	2:17962597-17968066	GYLTL1B	glycosyltransferase-like 1B [Source:HGNC Symbol;Acc:HGNC:16522]
XLOC_014947	2:17968444-18017928	ENSSSCG00000023974	3.24036	0.12729	-4.66996	0.03805	0.440912	102164136	I3LDB0	2:17968507-18017928	PHF21A	PHD finger protein 21A [Source:HGNC Symbol;Acc:HGNC:24156]
XLOC_014960	2:26520928-26524081	-	2.10198	0	-inf	5e-05	0.00483523	-	-	-	-	-
XLOC_014995	2:35227846-35264705	ENSSSCG00000013333	1.02319	0.141143	-2.85784	0.0207	0.340597	397495	P14082	2:35227847-35262533	BDNF	brain-derived neurotrophic factor [Source:HGNC Symbol;Acc:HGNC:1033]
XLOC_015046	2:45136142-45412705	ENSSSCG00000013382	4.17517	1.68462	-1.30941	0.0441	0.464929	-	F1S995	2:45136143-45412705	PLEKHA7	pleckstrin homology domain containing, family A member 7 [Source:HGNC Symbol;Acc:HGNC:27049]
XLOC_015129	2:59212894-59218018	ENSSSCG00000013901	119.062	45.0552	-1.40195	0.0244	0.369473	100174943	B3SP85	2:59214055-59218018	IFI30	Gamma-interferon-inducible-lysosomal thiol reductase [Source:UniProtKB/Swiss-Prot;Acc:B3SP85]
XLOC_015134	2:59499015-59500655	ENSSSCG00000013887	146.109	22.8865	-2.67447	0.01845	0.318607	397024	P51461	2:59499016-59500655	INSL3	Insulin-like 3 Insulin-like 3 B chain Insulin-like 3 A chain [Source:UniProtKB/Swiss-Prot;Acc:P51461]
XLOC_015141	2:59972774-60061384	ENSSSCG00000013870	9.19411	1.91556	-2.26294	0.0079	0.20201	-	F1S9U2	2:59972775-60061384	-	-
XLOC_015142	2:60062338-60077979	ENSSSCG00000013876	13.2491	5.59416	-1.2439	0.02105	0.345022	-	F1S959	2:60062339-60077979	-	-
XLOC_015191	2:64160635-64183207	ENSSSCG00000021675	0.9873	0.307919	-1.68094	0.04335	0.461898	-	K7GSI2,K7GPL1,K7GLJ0,K7GS34,I3LRL2,K7GSV2	2:64160636-64183207	EMR2	-
XLOC_015316	2:71119594-71159985	ENSSSCG00000013604	8.53818	1.34091	-2.67071	5e-05	0.00483523	100517998	F1SA47	2:71128768-71158974	-	-
XLOC_015328	2:71880459-71883380	-	13.1964	0.207808	-5.98874	0.01085	0.238958	-	-	-	-	-
XLOC_015332	2:71917404-71931695	ENSSSCG00000013579	11.2697	1.50631	-2.90335	0.0008	0.0405238	100170134	K7GKG7,K7GL38,B3FVQ2,K7GMG5	2:71917405-71931695	CD209	-
XLOC_015341	2:72634803-72644177	ENSSSCG00000022228	1.41526	0	-inf	0.03275	0.414243	-	I3L6C6,I3LE44	2:72634804-72644177	-	-
XLOC_015344	2:72699209-72739564	ENSSSCG00000013556	2.56689	0.122466	-4.38957	0.0478	0.482334	-	F1SCM7	2:72699548-72739564	ADGRE1	adhesion G protein-coupled receptor E1 [Source:HGNC Symbol;Acc:HGNC:3336]
XLOC_015353	2:73102028-73106172	ENSSSCG00000022370	11.6967	0.534435	-4.45194	5e-05	0.00483523	100736831	F1SBT1	2:73102120-73105460	TNFSF9	tumor necrosis factor (ligand) superfamily, member 9 [Source:HGNC Symbol;Acc:HGNC:11939]
XLOC_015388	2:75303278-75320529	-	15.3105	7.48633	-1.03219	0.0434	0.461898	-	-	-	-	-
XLOC_015390	2:75502629-75512989	ENSSSCG00000013494	2.18441	0.428376	-2.35029	0.0186	0.319125	100521543	F1S7P3	2:75503306-75510472	MATK	megakaryocyte-associated tyrosine kinase [Source:HGNC Symbol;Acc:HGNC:6906]
XLOC_015395	2:75765072-75779436	ENSSSCG00000026169	16.1977	2.82967	-2.51709	0.0003	0.0195183	100519240	F1S7R4	2:75765073-75778663	MFSD12	major facilitator superfamily domain containing 12 [Source:HGNC Symbol;Acc:HGNC:28299]
XLOC_015398	2:76097285-76098634	-	5.03089	0.641469	-2.97136	0.0234	0.363914	-	-	-	-	-
XLOC_015428	2:77532597-77569043	ENSSSCG00000013414	2.56646	1.04023	-1.30287	0.03985	0.451924	100622803	F1S6T2	2:77532598-77569043	ARID3A	AT rich interactive domain 3A (BRIGHT-like) [Source:HGNC Symbol;Acc:HGNC:3031]
XLOC_015433	2:77622509-77640489	ENSSSCG00000023121	1.62335	0.530224	-1.6143	0.0159	0.295951	-	I3LNU2	2:77623480-77640489	ABCA7	ATP-binding cassette, sub-family A (ABC1), member 7 [Source:HGNC Symbol;Acc:HGNC:37]
XLOC_015434	2:77641781-77655498	ENSSSCG00000027565	5.77948	1.78682	-1.69354	0.0067	0.179525	100623239	I3LCC0	2:77642049-77655498	HMHA1	histocompatibility (minor) HA-1 [Source:HGNC Symbol;Acc:HGNC:17102]
XLOC_015494	2:82278888-82294443	ENSSSCG00000014039	1.88102	0.336338	-2.48353	0.0222	0.355919	100524790	F1S3D6	2:82278889-82294443	RGS14	regulator of G-protein signaling 14 [Source:HGNC Symbol;Acc:HGNC:9996]
XLOC_015496	2:82646186-82685351	ENSSSCG00000014048	88.3484	10.861	-3.02404	0.00105	0.0498633	100522855	F1S3B7,K7GQ26,K7GMC0,K7GS73	2:82651078-82669061	HK3	hexokinase 3 (white cell) [Source:HGNC Symbol;Acc:HGNC:4925]
XLOC_015498	2:82909874-82920855	ENSSSCG00000014054	0.925365	0.185873	-2.3157	0.03045	0.40489	100525508	F1S3A2	2:82917021-82919873	GPRIN1	G protein regulated inducer of neurite outgrowth 1 [Source:HGNC Symbol;Acc:HGNC:24835]
XLOC_015502	2:83174026-83265093	ENSSSCG00000014060	40.9917	15.5732	-1.39626	0.02305	0.361644	100524242	F1S387	2:83176655-83192263	KIAA1191	KIAA1191 [Source:HGNC Symbol;Acc:HGNC:29209]
XLOC_015530	2:87348862-87364248	ENSSSCG00000014091	10.4099	0.666871	-3.96441	5e-05	0.00483523	100519703	F1S2H4	2:87348863-87364248	F2RL1	coagulation factor II (thrombin) receptor-like 1 [Source:HGNC Symbol;Acc:HGNC:3538]
XLOC_015537	2:88832451-88972822	ENSSSCG00000028536	39.8236	9.949	-2.001	0.0004	0.0238375	100523234	F1S2F5	2:88879233-88972822	LHFPL2	-
XLOC_015605	2:120318298-120434763	ENSSSCG00000014198|ENSSSCG00000014199	19.3955	4.54323	-2.09393	0.0314	0.408334	100515191|100627271	F1RLI5|F1RLI4	2:120318299-120323977|2:120387926-120430968	TSLP|WDR36	thymic stromal lymphopoietin [Source:HGNC Symbol;Acc:HGNC:30743]|WD repeat domain 36 [Source:HGNC Symbol;Acc:HGNC:30696]
XLOC_015613	2:121534757-121576729	ENSSSCG00000014207	2.5002	0.383998	-2.70287	0.0025	0.0934754	-	F1RLG3	2:121534758-121575617	APC	adenomatous polyposis coli [Source:HGNC Symbol;Acc:HGNC:583]
XLOC_015620	2:124598593-124600530	-	4.25707	0.739125	-2.52597	0.01085	0.238958	-	-	-	-	-
XLOC_015629	2:128752209-128798132	ENSSSCG00000028431	18.4749	3.86277	-2.25786	5e-05	0.00483523	-	I3LEF8	2:128752210-128798132	HSD17B4	hydroxysteroid (17-beta) dehydrogenase 4 [Source:HGNC Symbol;Acc:HGNC:5213]
XLOC_015653	2:135104022-135158940	ENSSSCG00000014248	12.8343	5.22085	-1.29764	0.0165	0.300289	100513342	F1RKM0	2:135104404-135158940	LMNB1	lamin B1 [Source:HGNC Symbol;Acc:HGNC:6637]
XLOC_015655	2:135507499-135682044	ENSSSCG00000014251	2.21627	0.210195	-3.39834	0.0036	0.120047	-	F1RKL7	2:135507500-135654500	MEGF10	multiple EGF-like-domains 10 [Source:HGNC Symbol;Acc:HGNC:29634]
XLOC_015658	2:136367846-136460659	ENSSSCG00000014255	5.54769	1.41795	-1.96808	0.0053	0.153203	100516960	F1RKK2	2:136368428-136457596	SLC12A2	solute carrier family 12 (sodium/potassium/chloride transporter), member 2 [Source:HGNC Symbol;Acc:HGNC:10911]
XLOC_015705	2:143444415-143453547	ENSSSCG00000014310	54.6839	7.58579	-2.84974	5e-05	0.00483523	494467	F1RHB4	2:143444416-143453547	CXCL14	-
XLOC_015726	2:146766454-146776592	-	57.894	9.44997	-2.61503	0.03535	0.426344	-	-	-	-	-
XLOC_015727	2:146842294-146859268	ENSSSCG00000024189	23.2644	4.92695	-2.23936	0.00665	0.179087	-	F1RGI8	2:146842295-146859268	SIL1	SIL1 nucleotide exchange factor [Source:HGNC Symbol;Acc:HGNC:24624]
XLOC_015738	2:147401557-147405675	-	17.9209	3.44024	-2.38106	0.0086	0.213744	-	-	-	-	-
XLOC_015782	2:150495711-150918983	ENSSSCG00000014399	0.724295	0.182586	-1.988	0.01595	0.296364	100520606	F1RM37	2:150495712-150918983	ARHGAP26	Rho GTPase activating protein 26 [Source:HGNC Symbol;Acc:HGNC:17073]
XLOC_015796	2:156973262-157053927	ENSSSCG00000023279	1.03617	0.0246586	-5.39302	0.0177	0.310956	100624660	I3LSQ9	2:156973263-157018259	SH3TC2	SH3 domain and tetratricopeptide repeats 2 [Source:HGNC Symbol;Acc:HGNC:29427]
XLOC_015797	2:157070401-157186531	ENSSSCG00000014430	5.38284	1.65613	-1.70056	0.00425	0.132191	-	F1RLA7	2:157099050-157184617	ABLIM3	actin binding LIM protein family, member 3 [Source:HGNC Symbol;Acc:HGNC:29132]
XLOC_015878	2:427412-429386	ENSSSCG00000021597	269.632	26.3078	-3.35743	5e-05	0.00483523	-	I3LP54	2:428408-429386	PHLDA2	pleckstrin homology-like domain, family A, member 2 [Source:HGNC Symbol;Acc:HGNC:12385]
XLOC_015896	2:1575574-1902581	ENSSSCG00000012869|ENSSSCG00000024158	1.31631	0.295413	-2.1557	0.0232	0.362908	-|-	F1RY81|I3LJG3	2:1866961-1902581|2:1575575-1605841	-|-	-|-
XLOC_015918	2:3884430-3892768	ENSSSCG00000012915	8.14318	2.72392	-1.57991	0.02135	0.348329	-	F1RUX6	2:3885576-3888922	CLCF1	cardiotrophin-like cytokine factor 1 [Source:HGNC Symbol;Acc:HGNC:17412]
XLOC_015940	2:5394664-5396971	ENSSSCG00000012960	32.9539	5.23688	-2.65367	0.00095	0.0461444	100622572,100522360	F1RU34	2:5395320-5396971	CST6	cystatin E/M [Source:HGNC Symbol;Acc:HGNC:2478]
XLOC_015942	2:5426778-5429390	-	18.4239	3.23413	-2.51013	0.0028	0.100966	-	-	-	-	-
XLOC_015985	2:6910944-6927124	ENSSSCG00000013034	8.53159	3.83572	-1.15332	0.032	0.410368	100525148	F1RQ08	2:6911684-6927124	PLCB3	phospholipase C, beta 3 (phosphatidylinositol-specific) [Source:HGNC Symbol;Acc:HGNC:9056]
XLOC_016017	2:8697654-8706373	ENSSSCG00000013067	29.7722	1.98518	-3.90662	0.0019	0.0781867	100144470	Q863D2	2:8697657-8703590	PHEROC	-
XLOC_016052	2:10854383-10878706	ENSSSCG00000013102	5.59616	1.66254	-1.75105	0.03015	0.40241	100628141	F1RIC4	2:10855774-10878566	MS4A7	membrane-spanning 4-domains, subfamily A, member 7 [Source:HGNC Symbol;Acc:HGNC:13378]
XLOC_016053	2:10959669-10979661	ENSSSCG00000013099	1.19568	0.422405	-1.50113	0.04875	0.485098	397166	F1RIC7	2:10959670-10979661	MS4A2	membrane-spanning 4-domains, subfamily A, member 2 [Source:HGNC Symbol;Acc:HGNC:7316]
XLOC_016132	2:15579769-15688569	ENSSSCG00000023709	2.47467	0.508158	-2.28389	0.01975	0.331112	100524973	I3LBB6	2:15632260-15688569	PTPRJ	protein tyrosine phosphatase, receptor type, J [Source:HGNC Symbol;Acc:HGNC:9673]
XLOC_016148	2:16972379-17035640	ENSSSCG00000013248	19.4753	1.2117	-4.00654	0.00605	0.167378	100518293	F1SIB6	2:16981002-17020205	LRP4	low density lipoprotein receptor-related protein 4 [Source:HGNC Symbol;Acc:HGNC:6696]
XLOC_016154	2:17530358-17564951	ENSSSCG00000013263	27.2877	10.2768	-1.40886	0.00905	0.217804	100516663	F1SI98	2:17530359-17564950	CREB3L1	cAMP responsive element binding protein 3-like 1 [Source:HGNC Symbol;Acc:HGNC:18856]
XLOC_016181	2:26810905-26895574	ENSSSCG00000013292	7.22613	2.05199	-1.8162	0.0128	0.262604	100523837	F1SHG4	2:26810906-26895574	PRR5L	proline rich 5 like [Source:HGNC Symbol;Acc:HGNC:25878]
XLOC_016186	2:28071758-28374853	ENSSSCG00000013297	89.8125	7.1243	-3.6561	5e-05	0.00483523	100525150	K7GM14,K7GKE4,K7GPJ1,K7GND9,K7GL11,F1SGT4,K7GPU3,K7GN90,K7GLL1,K7GLE2	2:28156392-28374853	CD44	CD44 molecule (Indian blood group) [Source:HGNC Symbol;Acc:HGNC:1681]
XLOC_016214	2:35818491-35890860	ENSSSCG00000013337	9.30958	1.78498	-2.38281	0.00395	0.125991	-	F1SGL4	2:35864281-35883381	-	-
XLOC_016224	2:40382283-40466297	ENSSSCG00000013344	0.917394	0.286536	-1.67883	0.024	0.36681	100520542	I3LFE1,F1SFZ1	2:40382284-40466246	ANO5	anoctamin 5 [Source:HGNC Symbol;Acc:HGNC:27337]
XLOC_016265	2:50485391-50615683	ENSSSCG00000013400|ENSSSCG00000020731|ENSSSCG00000021777	21.157	1.89472	-3.48108	0.0007	0.0363232	-|-|-	F1S6W8|I3LPM7|I3LE90	2:50485392-50492739|2:50555135-50555470|2:50496893-50513253	-|-|-	-|-|-
XLOC_016266	2:50642382-50654677	-	11.3811	0.390399	-4.86554	0.00035	0.0217727	-	-	-	-	-
XLOC_016272	2:52333001-52551640	ENSSSCG00000022492	10.9827	1.2208	-3.16934	0.04755	0.481593	100620914	I3LCG9	2:52379712-52419852	AMPD3	adenosine monophosphate deaminase 3 [Source:HGNC Symbol;Acc:HGNC:470]
XLOC_016276	2:53229709-53249166	ENSSSCG00000013411	65.5064	5.19617	-3.65612	0.01675	0.302253	100521487	F1S6U8	2:53229780-53244088	WEE1	WEE1 G2 checkpoint kinase [Source:HGNC Symbol;Acc:HGNC:12761]
XLOC_016291	2:55594202-55654298	ENSSSCG00000028473	311.846	52.0749	-2.58217	0.02245	0.357503	102165549	I3LKU3	2:55632537-55633517	-	-
XLOC_016317	2:58399688-58409261	ENSSSCG00000013931	4.96776	2.18403	-1.1856	0.02545	0.374705	100517882	F1S7C3	2:58399689-58409200	GMIP	GEM interacting protein [Source:HGNC Symbol;Acc:HGNC:24852]
XLOC_016362	2:61715859-61724985	ENSSSCG00000013839	1.95405	0.262839	-2.89421	0.01075	0.237988	-	F1SA02	2:61715860-61724721	RASAL3	RAS protein activator like 3 [Source:HGNC Symbol;Acc:HGNC:26129]
XLOC_016409	2:65565400-65610071	ENSSSCG00000013758	17.5537	1.05056	-4.06255	0.00015	0.0115208	100510892	F1SD76	2:65584924-65610041	ZSWIM4	zinc finger, SWIM-type containing 4 [Source:HGNC Symbol;Acc:HGNC:25704]
XLOC_016482	2:70193417-70206818	ENSSSCG00000030900	56.8713	12.1904	-2.22196	0.0098	0.226872	-	K7GRR0	2:70193418-70206818	LDLR	low-density lipoprotein receptor precursor [Source:RefSeq peptide;Acc:NP_001193283]
XLOC_016524	2:72827133-72890255	ENSSSCG00000013553	8.12766	1.66597	-2.28648	0.00325	0.112612	100519821	F1SCN0	2:72827624-72857071	VAV1	vav 1 guanine nucleotide exchange factor [Source:RefSeq peptide;Acc:NP_001254762]
XLOC_016527	2:72967559-72980200	ENSSSCG00000013546	4.81541	1.05751	-2.18699	0.0043	0.133551	100518598,100737024	F1SBS9	2:72969506-72978894	DENND1C	DENN/MADD domain containing 1C [Source:HGNC Symbol;Acc:HGNC:26225]
XLOC_016528	2:72985407-73085304	ENSSSCG00000013545	61.0817	1.58674	-5.2666	0.01595	0.296364	100736584	F2Z5K5	2:73063907-73085299	TUBB4A	tubulin, beta 4A class IVa [Source:HGNC Symbol;Acc:HGNC:20774]
XLOC_016568	2:75665518-75667642	-	11.4457	3.68419	-1.63538	0.013	0.264919	-	-	-	-	-
XLOC_016577	2:75927950-75949085	ENSSSCG00000013473	6.77006	0.746721	-3.18053	0.0002	0.0143266	-	F1S8F1	2:75927951-75949085	GNA15	guanine nucleotide binding protein (G protein), alpha 15 (Gq class) [Source:HGNC Symbol;Acc:HGNC:4383]
XLOC_016594	2:77053521-77071191	ENSSSCG00000013457	6.64039	1.64064	-2.01701	0.00085	0.0423507	-	I3LS01,F1S8I5	2:77056150-77069932	DOT1L	DOT1-like histone H3K79 methyltransferase [Source:HGNC Symbol;Acc:HGNC:24948]
XLOC_016664	2:83505538-83554228	ENSSSCG00000029096	1.52032	0.198301	-2.93861	0.00435	0.134515	100625720	I3L760	2:83529780-83554056	HRH2	histamine receptor H2 [Source:HGNC Symbol;Acc:HGNC:5183]
XLOC_016672	2:85271176-85284913	ENSSSCG00000014072	59.0389	7.37374	-3.0012	0.00255	0.0948448	100517459	F1S2J9	2:85273800-85284179	ENC1	ectodermal-neural cortex 1 (with BTB domain) [Source:HGNC Symbol;Acc:HGNC:3345]
XLOC_016678	2:85693063-85722431	ENSSSCG00000029710	4.13095	1.04602	-1.98156	0.00975	0.226453	100518180	I3LAJ3	2:85693064-85722431	GCNT4	glucosaminyl (N-acetyl) transferase 4, core 2 [Source:HGNC Symbol;Acc:HGNC:17973]
XLOC_016698	2:89270224-89356834	ENSSSCG00000014105	5.10898	1.90287	-1.42486	0.0153	0.28857	-	F1S2F3	2:89326900-89328332	ARSB	arylsulfatase B [Source:HGNC Symbol;Acc:HGNC:714]
XLOC_016701	2:89843522-90121935	ENSSSCG00000014113	5.88654	0.933683	-2.65641	0.0236	0.364626	100511070	F1RF45	2:89844360-89996126	HOMER1	homer homolog 1 [Source:RefSeq peptide;Acc:NP_001230740]
XLOC_016725	2:97239446-97245263	-	6.18401	0.0750836	-6.3639	0.0417	0.457293	-	-	-	-	-
XLOC_016748	2:106402540-106475303	ENSSSCG00000014168	10.9523	2.9704	-1.8825	0.0007	0.0363232	100523777	F1RNV6	2:106406384-106475265	ELL2	elongation factor, RNA polymerase II, 2 [Source:HGNC Symbol;Acc:HGNC:17064]
XLOC_016772	2:121253510-121295449	ENSSSCG00000029033	4.035	0.871796	-2.21051	0.0301	0.402247	106509520	I3LJ85	2:121253511-121295449	-	-
XLOC_016773	2:121307405-121321227	ENSSSCG00000014203	3.75507	0.412138	-3.18764	0.0111	0.242706	100515712	F1RLH9	2:121307406-121321227	-	-
XLOC_016776	2:121576963-121581644	ENSSSCG00000024866	4.59418	1.58198	-1.53807	0.00575	0.162028	-	-	2:121578953-121581644	-	-
XLOC_016787	2:124628608-124644415	ENSSSCG00000014217	3.86803	0.717267	-2.43102	0.02485	0.371267	100736614	F1RLE6	2:124628609-124644415	FEM1C	fem-1 homolog c (C. elegans) [Source:HGNC Symbol;Acc:HGNC:16933]
XLOC_016807	2:135176965-135323481	ENSSSCG00000014249	42.626	7.99561	-2.41445	0.0003	0.0195183	100513526	F1RKL9	2:135176966-135323481	MARCH3	membrane-associated ring finger (C3HC4) 3, E3 ubiquitin protein ligase [Source:HGNC Symbol;Acc:HGNC:28728]
XLOC_016809	2:135698749-135704767	-	1.40582	0.429759	-1.70981	0.024	0.36681	-	-	-	-	-
XLOC_016818	2:138017679-138024693	-	8.89001	1.11295	-2.99779	0.03995	0.452334	-	-	-	-	-
XLOC_016836	2:141008885-141113679	ENSSSCG00000014293	1.31285	0.264532	-2.31119	0.0463	0.475631	-	F1RI14	2:141008886-141036701	FSTL4	follistatin-like 4 [Source:HGNC Symbol;Acc:HGNC:21389]
XLOC_016837	2:141259822-141263763	ENSSSCG00000030689	0.915925	0	-inf	0.02415	0.368045	-	I3LNG9	2:141259823-141263763	-	-
XLOC_016840	2:142041627-142073804	ENSSSCG00000030680	4.43587	0.827655	-2.42212	0.0051	0.150073	-	I3LUM5	2:142041628-142073804	TCF7	transcription factor 7 (T-cell specific, HMG-box) [Source:HGNC Symbol;Acc:HGNC:11639]
XLOC_016875	2:146889127-146952329	ENSSSCG00000014342	34.9581	9.84666	-1.82792	0.02015	0.334393	-	F1RGI9	2:146889128-146952329	-	-
XLOC_016891	2:148045574-148058382	ENSSSCG00000014362	32.358	1.62461	-4.31595	5e-05	0.00483523	397564	F1RGF0	2:148046706-148058378	HBEGF	proheparin-binding EGF-like growth factor precursor [Source:RefSeq peptide;Acc:NP_999464]
XLOC_016896	2:148290295-148294585	ENSSSCG00000014369	34.9349	10.2541	-1.76847	0.0036	0.120047	100037938	A2SW51	2:148291451-148293622	CD14	-
XLOC_016913	2:150316920-150435039	ENSSSCG00000024954	6.40649	2.15785	-1.56994	0.01685	0.302773	397497	F1RM38	2:150317384-150418060	FGF1	fibroblast growth factor 1 (acidic) [Source:HGNC Symbol;Acc:HGNC:3665]
XLOC_016949	2:157855537-157908028	ENSSSCG00000014441	9.72151	3.42968	-1.50311	0.0318	0.409184	100517086	F1RL77	2:157856239-157882290	CSF1R	colony stimulating factor 1 receptor [Source:HGNC Symbol;Acc:HGNC:2433]
XLOC_017104	2:26913034-26913525	-	2.45311	0	-inf	5e-05	0.00483523	-	-	-	-	-
XLOC_017105	2:26923086-26923642	-	2.53704	0.1013	-4.64644	0.0419	0.457293	-	-	-	-	-
XLOC_017106	2:26923732-26925219	-	0.802966	0	-inf	0.0002	0.0143266	-	-	-	-	-
XLOC_017122	2:34205508-34205792	-	151.494	13.5507	-3.48282	0.0104	0.233151	-	-	-	-	-
XLOC_017213	2:73115263-73115513	-	73.6677	2.25895	-5.02731	0.04795	0.482334	-	-	-	-	-
XLOC_017279	2:88496263-88496552	-	43.6106	7.89902	-2.46493	0.04155	0.457293	-	-	-	-	-
XLOC_017285	2:89173666-89174158	-	1.01379	0	-inf	0.0023	0.0881667	-	-	-	-	-
XLOC_017456	3:2173930-2201180	ENSSSCG00000007565	23.0179	9.08784	-1.34075	0.0116	0.24828	-	F1RI78	3:2173931-2198099	TTYH3	tweety family member 3 [Source:HGNC Symbol;Acc:HGNC:22222]
XLOC_017482	3:5731183-5741755	ENSSSCG00000007603	51.0296	4.95973	-3.363	0.00025	0.0168849	100521613	F1RFK6	3:5732132-5740519	NPTX2	neuronal pentraxin II [Source:HGNC Symbol;Acc:HGNC:7953]
XLOC_017505	3:7284977-7299536	ENSSSCG00000025271	3.23267	0.305021	-3.40575	0.00635	0.173423	-	I3LSL1	3:7284978-7296937	-	-
XLOC_017509	3:7421029-7839602	ENSSSCG00000007644|ENSSSCG00000026653	5.7832	0.496689	-3.54145	0.03765	0.438906	-|-	F1RNP0|I3LG64	3:7421162-7430979|3:7660715-7666842	-|-	-|-
XLOC_017557	3:10902737-10908517	-	28.5975	11.005	-1.37773	0.01345	0.267679	-	-	-	-	-
XLOC_017562	3:11037021-11055319	ENSSSCG00000027487	44.5732	15.1876	-1.55329	0.02635	0.381618	100627864	I3L569	3:11037022-11055319	LAT2	linker for activation of T cells family, member 2 [Source:HGNC Symbol;Acc:HGNC:12749]
XLOC_017580	3:16924756-16939447	ENSSSCG00000007739	48.9716	14.6157	-1.74443	0.001	0.0482426	100144519	Q4FAT7	3:16924757-16939447	GUSB	glucuronidase, beta [Source:HGNC Symbol;Acc:HGNC:4696]
XLOC_017632	3:19004233-19112448	ENSSSCG00000007812	14.8544	6.67961	-1.15305	0.02325	0.362908	100518364	F1RFG5	3:19004234-19111895	XPO6	exportin 6 [Source:HGNC Symbol;Acc:HGNC:19733]
XLOC_017660	3:25945850-26030668	ENSSSCG00000007854	9.16729	2.23895	-2.03367	0.0294	0.398398	100525983	F1RPB5	3:25968050-25972398	DCUN1D3	DCN1, defective in cullin neddylation 1, domain containing 3 [Source:HGNC Symbol;Acc:HGNC:28734]
XLOC_017692	3:33124809-33146406	ENSSSCG00000007901	6.0306	0.4948	-3.60738	0.00235	0.0894387	-	F1RL12,K7GNM0	3:33125172-33145562	CIITA	-
XLOC_017735	3:40322297-40337266	ENSSSCG00000007964	1.29773	0.0681822	-4.25046	0.0017	0.0721906	100517333	F1RHL5,K7GPP4	3:40322534-40336490	MEFV	-
XLOC_017835	3:46620641-46904232	-	348.771	47.5756	-2.87399	0.0334	0.416925	-	-	-	-	-
XLOC_017852	3:49192956-49195006	ENSSSCG00000008128	42.4447	4.22014	-3.33022	0.0004	0.0238375	-	F1SU43	3:49192957-49195006	DUSP2	dual specificity phosphatase 2 [Source:HGNC Symbol;Acc:HGNC:3068]
XLOC_017859	3:49819920-49851086	ENSSSCG00000023884	2.20573	0.280086	-2.97732	0.009	0.217338	100624304	I3LLK1	3:49819921-49851086	-	-
XLOC_017870	3:54844757-54846439	-	0.79191	0.0311127	-4.66976	0.0418	0.457293	-	-	-	-	-
XLOC_017871	3:54936914-54953256	ENSSSCG00000008163	59.5335	3.5825	-4.05466	5e-05	0.00483523	-	F1STG6	3:54939544-54952578	IL1R2	-
XLOC_017872	3:54960545-54962517	-	1.05149	0.0875104	-3.58684	0.0205	0.338879	-	-	-	-	-
XLOC_017930	3:62299110-62301167	ENSSSCG00000008236	14.6138	3.17598	-2.20206	0.04245	0.458346	-	F1SVB3	3:62299111-62301167	TGOLN2	trans-golgi network protein 2 [Source:HGNC Symbol;Acc:HGNC:15450]
XLOC_017949	3:71071110-71109627	-	1.33365	0.0114639	-6.86214	0.04215	0.457755	-	-	-	-	-
XLOC_018000	3:76459759-76519186	ENSSSCG00000008339	10.8025	2.56453	-2.0746	0.0323	0.41198	397209	F1SPM7,F1SPM6	3:76459924-76509989	GFPT1	glutamine--fructose-6-phosphate transaminase 1 [Source:HGNC Symbol;Acc:HGNC:4241]
XLOC_018018	3:81482726-81492218	-	21.3031	5.92776	-1.8455	0.0279	0.391208	-	-	-	-	-
XLOC_018077	3:99602189-99646256	ENSSSCG00000008434	1.66665	0.389305	-2.09798	0.0422	0.45783	100522733	F1S5M5	3:99602190-99646256	TTC7A	tetratricopeptide repeat domain 7A [Source:HGNC Symbol;Acc:HGNC:19750]
XLOC_018127	3:113229354-113673397	ENSSSCG00000008510	41.6173	5.38432	-2.95035	0.0149	0.282781	-	F1S405	3:113229601-113504003	LTBP1	latent transforming growth factor beta binding protein 1 [Source:HGNC Symbol;Acc:HGNC:6714]
XLOC_018143	3:115308318-115312540	-	4.53727	1.89284	-1.26127	0.03135	0.408183	-	-	-	-	-
XLOC_018206	3:121987208-122035858	ENSSSCG00000008591	0.880584	0.147281	-2.57989	0.0246	0.369869	-	F1SCW5	3:121987652-122035858	-	-
XLOC_018226	3:129216673-129319025	ENSSSCG00000008617	3.05041	0.876344	-1.79944	0.00485	0.145125	100518011	F2Z5E7	3:129216701-129316886	FAM49A	family with sequence similarity 49, member A [Source:HGNC Symbol;Acc:HGNC:25373]
XLOC_018310	3:4725621-4729017	-	1.45779	0.287703	-2.34113	0.0129	0.263133	-	-	-	-	-
XLOC_018316	3:5013716-5021792	ENSSSCG00000025567	64.1243	30.8717	-1.05459	0.04755	0.481593	100625519	I3LKF3	3:5013717-5021792	-	-
XLOC_018327	3:6211405-6290812	ENSSSCG00000007608	10.5516	3.42512	-1.62324	0.014	0.273731	-	F1RFK1	3:6211407-6227782	-	-
XLOC_018389	3:10670274-10688002	ENSSSCG00000007714	3.33695	0.811335	-2.04016	0.0233	0.363156	100512594	F1RJM9	3:10670275-10679940	STX1A	syntaxin 1A (brain) [Source:HGNC Symbol;Acc:HGNC:11433]
XLOC_018409	3:16560348-16631079	ENSSSCG00000007735	9.09054	4.26411	-1.09212	0.0404	0.453814	100516668	F1RJI2	3:16560349-16629075	RABGEF1	RAB guanine nucleotide exchange factor (GEF) 1 [Source:HGNC Symbol;Acc:HGNC:17676]
XLOC_018423	3:17349583-17355969	ENSSSCG00000024058	8.79029	1.53143	-2.52103	0.0041	0.129035	-	K7GRQ7,K7GL44,K7GQI2,I3LKT6,K7GT19	3:17349584-17355942	SLC5A2	-
XLOC_018460	3:18607802-18612129	ENSSSCG00000023772	2.54499	0.226506	-3.49004	0.0037	0.12129	-	I3LH46	3:18607803-18612129	SPN	sialophorin [Source:HGNC Symbol;Acc:HGNC:11249]
XLOC_018470	3:19842264-19844846	-	1.24468	0.162371	-2.9384	0.0185	0.318694	-	-	-	-	-
XLOC_018471	3:19846354-19870510	ENSSSCG00000007817	33.6486	8.86741	-1.92396	0.00915	0.218726	397614	K7GL08,F1RFF9,K7GML2	3:19846364-19869474	IL4R	interleukin-4 receptor subunit alpha precursor [Source:RefSeq peptide;Acc:NP_999505]
XLOC_018517	3:26927976-27070269	ENSSSCG00000007866	1.15491	0.204652	-2.49654	0.01605	0.296818	-	F1RP99	3:26965267-27004343	TMC7	transmembrane channel-like 7 [Source:HGNC Symbol;Acc:HGNC:23000]
XLOC_018524	3:29067725-29172715	ENSSSCG00000007874	3.46585	1.22864	-1.49614	0.041	0.455496	-	F1RLT0	3:29068053-29172715	ABCC1	ATP-binding cassette, sub-family C (CFTR/MRP), member 1 [Source:HGNC Symbol;Acc:HGNC:51]
XLOC_018533	3:31472168-31614165	ENSSSCG00000007885	0.866146	0	-inf	0.03315	0.416332	100626399	F1RLR0	3:31472169-31614165	-	-
XLOC_018677	3:45305356-45326321	ENSSSCG00000008088	57.7467	0.542622	-6.73365	5e-05	0.00483523	397122	P26889	3:45319296-45326307	IL1B1	Interleukin-1 beta [Source:UniProtKB/Swiss-Prot;Acc:P26889]
XLOC_018679	3:45452987-45466251	ENSSSCG00000008090	11.7472	0.334924	-5.13234	0.00125	0.0571909	397094	P18430	3:45453545-45466239	IL1A	interleukin 1, alpha [Source:HGNC Symbol;Acc:HGNC:5991]
XLOC_018685	3:46158964-46374407	ENSSSCG00000008103	1.82213	0.274593	-2.73026	0.0389	0.445904	-	F1SU88	3:46170011-46374407	-	-
XLOC_018703	3:48848333-48860885	ENSSSCG00000008123	10.4233	4.46884	-1.22184	0.0366	0.431154	100524615	F1SU48	3:48848334-48860885	ARID5A	AT rich interactive domain 5A (MRF1-like) [Source:HGNC Symbol;Acc:HGNC:17361]
XLOC_018730	3:54374029-54518149	ENSSSCG00000008159	9.36215	0.618172	-3.92076	5e-05	0.00483523	-	F1STH0	3:54374030-54518149	IL1RL1	interleukin 1 receptor-like 1 [Source:HGNC Symbol;Acc:HGNC:5998]
XLOC_018734	3:54901370-54919900	ENSSSCG00000028331	83.2224	6.65966	-3.64345	5e-05	0.00483523	100628112	I3LE48	3:54901371-54919900	IL1R2	interleukin-1 receptor type 2 precursor [Source:RefSeq peptide;Acc:NP_001230292]
XLOC_018759	3:59834044-59864868	ENSSSCG00000008207	57.4088	27.4718	-1.06332	0.02785	0.391208	100038014	F1STC1	3:59834045-59864868	RPIA	ribose 5-phosphate isomerase A [Source:HGNC Symbol;Acc:HGNC:10297]
XLOC_018801	3:67119261-67408643	ENSSSCG00000008254	2.48843	0.546121	-2.18794	0.03585	0.428729	100525516	F1SNX3	3:67119262-67408643	-	-
XLOC_018804	3:71020998-71027937	-	4.36385	0.362414	-3.58989	0.0201	0.334084	-	-	-	-	-
XLOC_018808	3:71329942-71407885	ENSSSCG00000008261	7.22152	0.620664	-3.54042	5e-05	0.00483523	494561	F1SNW8	3:71331772-71407448	HK2	hexokinase-2 [Source:RefSeq peptide;Acc:NP_001116459]
XLOC_018826	3:72074723-72176994	ENSSSCG00000008292	5.97075	0.458657	-3.70242	5e-05	0.00483523	100520484	F1SLG7	3:72080815-72176994	TET3	tet methylcytosine dioxygenase 3 [Source:HGNC Symbol;Acc:HGNC:28313]
XLOC_018829	3:72355660-72389741	ENSSSCG00000008300	10.9234	3.7377	-1.5472	0.0124	0.257376	100516729	F1SLF9	3:72356715-72389736	STAMBP	STAM binding protein [Source:HGNC Symbol;Acc:HGNC:16950]
XLOC_018851	3:75816149-75939886	ENSSSCG00000008334	8.30865	1.37275	-2.59755	0.00865	0.214466	100625349	F1SLC7	3:75917156-75939798	MXD1	MAX dimerization protein 1 [Source:HGNC Symbol;Acc:HGNC:6761]
XLOC_018867	3:77408770-77439119	ENSSSCG00000008348	22.9803	1.00833	-4.51036	5e-05	0.00483523	100516257	F1SJ07	3:77408777-77439119	-	-
XLOC_018872	3:80214007-80225779	-	4.51496	0	-inf	0.0314	0.408334	-	-	-	-	-
XLOC_018887	3:83442324-83475405	ENSSSCG00000008374	12.2398	5.70907	-1.10025	0.03595	0.429316	100623864,100524195	F1SIW5	3:83444205-83445398	-	-
XLOC_018897	3:84953819-85003738	ENSSSCG00000008388	1.38992	0.625234	-1.15254	0.0381	0.441251	100525104	F1SQL8	3:84967854-85003436	REL	v-rel avian reticuloendotheliosis viral oncogene homolog [Source:HGNC Symbol;Acc:HGNC:9954]
XLOC_018908	3:90445301-90446366	-	2.09422	0.350281	-2.57983	0.04885	0.485098	-	-	-	-	-
XLOC_018935	3:99311908-99328715	ENSSSCG00000008429	138.238	6.96219	-4.31147	5e-05	0.00483523	403163	Q75QW1	3:99312715-99328503	EPCAM	Epithelial cell adhesion molecule [Source:UniProtKB/Swiss-Prot;Acc:Q75QW1]
XLOC_018939	3:99795121-99797515	-	8.6788	0.185529	-5.54778	0.0144	0.276998	-	-	-	-	-
XLOC_018955	3:103257717-103374716	-	4.97833	0.165156	-4.91376	0.0373	0.43626	-	-	-	-	-
XLOC_018986	3:108926010-108964964	ENSSSCG00000021359	92.1931	15.8183	-2.54307	0.04355	0.462338	100521443	F1S4Q9	3:108936244-108958888	-	-
XLOC_018987	3:109202003-109205334	ENSSSCG00000008490	165.574	31.0008	-2.4171	0.0037	0.12129	100739698	F1S4Q9	3:109204163-109204927	-	-
XLOC_019005	3:114856679-114860102	ENSSSCG00000027034	3.70096	0.327053	-3.5003	0.0142	0.275392	-	I3LTZ1	3:114856680-114860102	-	-
XLOC_019012	3:116925044-116927361	-	3.77135	0	-inf	0.04435	0.465949	-	-	-	-	-
XLOC_019013	3:116931676-117024652	ENSSSCG00000008535	8.35831	0.560704	-3.8979	0.02155	0.349982	100518607	F1S3X7	3:116933719-117001691	CLIP4	CAP-GLY domain containing linker protein family, member 4 [Source:HGNC Symbol;Acc:HGNC:26108]
XLOC_019015	3:117059383-117102291	ENSSSCG00000008534	13.149	0.600355	-4.453	0.0001	0.00857863	100518963	I3LH82,F1S3X8,I3LH57	3:117059648-117102291	FAM179A	family with sequence similarity 179, member A [Source:HGNC Symbol;Acc:HGNC:33715]
XLOC_019030	3:118446895-118497711	ENSSSCG00000008549	3.70321	1.51284	-1.29152	0.04495	0.46924	100521846	F1SED8	3:118469853-118497711	SLC4A1AP	solute carrier family 4 (anion exchanger), member 1, adaptor protein [Source:HGNC Symbol;Acc:HGNC:13813]
XLOC_019048	3:119279960-119296228	ENSSSCG00000008562	17.6085	6.66542	-1.4015	0.00905	0.217804	100513653	F1SDQ0	3:119279961-119296228	SLC35F6	solute carrier family 35, member F6 [Source:HGNC Symbol;Acc:HGNC:26055]
XLOC_019051	3:119564021-119608658	ENSSSCG00000030643	10.9729	3.45374	-1.66771	0.00605	0.167378	100512162	I3L5E9	3:119570474-119608570	EPT1	ethanolaminephosphotransferase 1 (CDP-ethanolamine-specific) [Source:RefSeq peptide;Acc:NP_001231591]
XLOC_019063	3:121888310-121899575	ENSSSCG00000008588	103.69	14.7423	-2.81424	0.0005	0.0279934	100522131	F2Z5F0	3:121888786-121899444	FKBP1B	FK506 binding protein 1B, 12.6 kDa [Source:HGNC Symbol;Acc:HGNC:3712]
XLOC_019065	3:122136103-122442078	ENSSSCG00000008593	4.97435	2.23239	-1.15592	0.0424	0.458346	-	F1SCW1	3:122136104-122272144	KLHL29	kelch-like family member 29 [Source:HGNC Symbol;Acc:HGNC:29404]
XLOC_019071	3:125988567-126001168	ENSSSCG00000008601	100.131	18.3651	-2.44685	0.00025	0.0168849	100519770	F1SCU4,K7GPB7,K7GNF5,K7GR48	3:125988735-125994234	SDC1	syndecan-1 precursor [Source:RefSeq peptide;Acc:NP_001230119]
XLOC_019086	3:132790605-132816991	ENSSSCG00000008623	13.2333	5.09798	-1.37617	0.0361	0.430027	-	-	3:132792631-132793101	-	-
XLOC_019090	3:133660274-133741130	ENSSSCG00000008624	6.56056	1.18598	-2.46774	5e-05	0.00483523	100170845	F1SCR6,I3LL23	3:133660275-133741130	-	-
XLOC_019096	3:134793116-134798201	-	1.53223	0	-inf	5e-05	0.00483523	-	-	-	-	-
XLOC_019107	3:135801779-135804369	ENSSSCG00000008645	68.6966	20.0941	-1.77347	0.0048	0.144646	654298	Q2VIU1	3:135801780-135804369	ID2	DNA-binding protein inhibitor ID-2 [Source:UniProtKB/Swiss-Prot;Acc:Q2VIU1]
XLOC_019115	3:138379244-138388801	-	1.56057	0	-inf	0.0002	0.0143266	-	-	-	-	-
XLOC_019321	3:34522249-34522797	-	3.06592	0.3867	-2.98703	0.04725	0.480748	-	-	-	-	-
XLOC_019404	3:46986925-46991142	-	0.818651	0.13577	-2.59208	0.0251	0.372647	-	-	-	-	-
XLOC_019429	3:54920438-54922059	-	1.63856	0.0214658	-6.25424	0.04165	0.457293	-	-	-	-	-
XLOC_019440	3:58741202-58741489	-	32.6697	5.64858	-2.53199	0.0482	0.483933	-	-	-	-	-
XLOC_019445	3:59746504-59747236	-	2.14017	0.282107	-2.92341	0.0408	0.455176	-	-	-	-	-
XLOC_019468	3:72054507-72054718	-	523.881	9.49418	-5.78605	0.04795	0.482334	-	-	-	-	-
XLOC_019585	3:108678068-108678431	-	3.08345	0	-inf	0.00085	0.0423507	-	-	-	-	-
XLOC_019586	3:108711263-108712933	-	0.795935	0	-inf	5e-05	0.00483523	-	-	-	-	-
XLOC_019592	3:108827859-108828238	-	4.04352	0	-inf	0.0002	0.0143266	-	-	-	-	-
XLOC_019596	3:109198591-109199400	-	1.76977	0	-inf	0.00015	0.0115208	-	-	-	-	-
XLOC_019651	3:134798364-134799377	-	1.6578	0	-inf	5e-05	0.00483523	-	-	-	-	-
XLOC_019671	3:138463868-138464752	-	5.3157	0.188905	-4.81453	0.03245	0.41241	-	-	-	-	-
XLOC_019724	4:2362659-2385521	ENSSSCG00000005935	3.39313	1.10156	-1.62307	0.01865	0.319725	-	F1RSJ1	4:2362660-2385521	AGO2	argonaute RISC catalytic component 2 [Source:HGNC Symbol;Acc:HGNC:3263]
XLOC_019740	4:7889408-7931354	ENSSSCG00000005944	47.7288	13.1581	-1.85891	0.00225	0.0873517	100156071	F1RRV6	4:7894534-7931354	NDRG1	N-myc downstream regulated 1 [Source:HGNC Symbol;Acc:HGNC:7679]
XLOC_019778	4:17558802-17559372	-	40.52	7.60718	-2.4132	0.0123	0.256803	-	-	-	-	-
XLOC_019796	4:23607330-23622320	-	35.1889	0.826576	-5.41183	5e-05	0.00483523	-	-	-	-	-
XLOC_019797	4:23681554-23710271	-	22.8568	0.604108	-5.24167	5e-05	0.00483523	-	-	-	-	-
XLOC_019809	4:31023961-31153339	ENSSSCG00000006031	8.63055	2.19492	-1.97528	0.0405	0.453814	100525987	K7GT14,F1S1G2	4:31062936-31067473	TMEM74	transmembrane protein 74 [Source:HGNC Symbol;Acc:HGNC:26409]
XLOC_019835	4:39227811-39312879	ENSSSCG00000006064	32.2087	3.36329	-3.25951	0.02395	0.366573	-	F1S0Q5	4:39228080-39311479	SNX31	sorting nexin 31 [Source:HGNC Symbol;Acc:HGNC:28605]
XLOC_019869	4:45876455-45889991	ENSSSCG00000006105	25.7555	6.80553	-1.9201	0.00435	0.134515	404772	F1RY45	4:45876686-45889986	GEM	GTP binding protein overexpressed in skeletal muscle [Source:HGNC Symbol;Acc:HGNC:4234]
XLOC_019885	4:53295249-53606562	ENSSSCG00000006132	0.835911	0.318226	-1.3933	0.0372	0.43557	100153257	F1RXD8	4:53437527-53598063	MMP16	matrix metallopeptidase 16 (membrane-inserted) [Source:HGNC Symbol;Acc:HGNC:7162]
XLOC_019899	4:60462319-60634349	ENSSSCG00000006154	9.56627	0.460064	-4.37805	5e-05	0.00483523	100157912	F1RXA1	4:60606379-60626273	PAG1	phosphoprotein membrane anchor with glycosphingolipid microdomains 1 [Source:HGNC Symbol;Acc:HGNC:30043]
XLOC_019928	4:71106321-71255548	ENSSSCG00000006196	1.2936	0.215567	-2.58518	0.0022	0.0866759	-	F1RU07	4:71108680-71249575	SLCO5A1	solute carrier organic anion transporter family, member 5A1 [Source:HGNC Symbol;Acc:HGNC:19046]
XLOC_019953	4:78234965-78296688	ENSSSCG00000029126	12.3533	3.28392	-1.9114	0.0207	0.340597	100525988,100736695	I3LGF7	4:78268197-78286516	-	-
XLOC_019974	4:84281793-84340043	ENSSSCG00000006263	19.7334	8.64115	-1.19134	0.018	0.314151	397472	F1RSG6,I3LQB3	4:84281794-84340043	ATP6V1H	ATPase, H+ transporting, lysosomal 50/57kDa, V1 subunit H [Source:HGNC Symbol;Acc:HGNC:18303]
XLOC_019996	4:88931477-88988110	ENSSSCG00000006287	12.0538	4.07118	-1.56596	0.02415	0.368045	100127147	A8R080,K7GNW0	4:88931478-88951561	SELL	-
XLOC_019997	4:88990348-89026180	ENSSSCG00000006288	2.9322	0.786892	-1.89775	0.01325	0.266188	397150	F1RPW3	4:88990349-89025954	SELP	P-selectin precursor [Source:RefSeq peptide;Acc:NP_999243]
XLOC_020008	4:91134120-91147126	ENSSSCG00000006308	143.26	45.9479	-1.64057	0.01835	0.317137	100152373	F1S268	4:91134122-91146232	CREG1	cellular repressor of E1A-stimulated genes 1 [Source:HGNC Symbol;Acc:HGNC:2351]
XLOC_020016	4:92281452-92434582	ENSSSCG00000006321	10.8699	2.9122	-1.90016	0.0092	0.219428	100153010	F1S245	4:92281607-92433219	FAM78B	family with sequence similarity 78, member B [Source:HGNC Symbol;Acc:HGNC:13495]
XLOC_020027	4:96387697-96391334	-	3.74314	0.953801	-1.97249	0.03975	0.45103	-	-	-	-	-
XLOC_020046	4:97461922-97479289	ENSSSCG00000006378	2.15223	0.295929	-2.86251	0.0034	0.116481	100154053	F1S170,K7GQL3	4:97461923-97479289	SLAMF7	SLAM family member 7 [Source:HGNC Symbol;Acc:HGNC:21394]
XLOC_020049	4:97721012-97736628	ENSSSCG00000006379	11.0663	1.56422	-2.82266	0.0006	0.0319925	100511130	F1RJY9,K7GT22	4:97721030-97736619	CD48	-
XLOC_020051	4:97824359-97863083	ENSSSCG00000006381	2.12408	0.123959	-4.0989	0.00015	0.0115208	100152851	K7GRM9,K7GT03,F1RJY5	4:97824478-97853630	CD84	CD84 molecule [Source:HGNC Symbol;Acc:HGNC:1704]
XLOC_020052	4:97870919-97894523	ENSSSCG00000006382	1.20537	0.171309	-2.8148	0.01005	0.229414	100156912	F1RJY4	4:97870920-97893024	SLAMF6	SLAM family member 6 [Source:HGNC Symbol;Acc:HGNC:21392]
XLOC_020089	4:99905519-99909277	ENSSSCG00000025644	33.6701	3.95039	-3.0914	0.0004	0.0238375	396785	A0ZPR3	4:99905535-99909248	CD1A	CD1a molecule [Source:HGNC Symbol;Acc:HGNC:1634]
XLOC_020100	4:101423344-101436978	ENSSSCG00000024970	43.2349	6.83653	-2.66086	0.00395	0.125991	100738127	F1RHL1	4:101424412-101436945	ETV3	ets variant 3 [Source:HGNC Symbol;Acc:HGNC:3492]
XLOC_020158	4:104459173-104460614	-	1.22653	0	-inf	0.00015	0.0115208	-	-	-	-	-
XLOC_020169	4:105063476-105066300	ENSSSCG00000006588	863.636	38.3663	-4.49251	0.00735	0.192102	100127489	C3S7K6	4:105063477-105066298	S100A9	S100 calcium binding protein A9 [Source:HGNC Symbol;Acc:HGNC:10499]
XLOC_020265	4:114056406-114166174	ENSSSCG00000006737	1.58024	0.393361	-2.00621	0.01335	0.266937	100512602	F1SAX8	4:114056407-114166174	IGSF3	immunoglobulin superfamily, member 3 [Source:HGNC Symbol;Acc:HGNC:5950]
XLOC_020267	4:114211565-114216813	-	1.90896	0.608867	-1.64859	0.02405	0.367311	-	-	-	-	-
XLOC_020274	4:115638000-115680736	ENSSSCG00000006748	9.79732	2.85423	-1.77929	0.01005	0.229414	100156161	F1SAW5	4:115641713-115680720	TSPAN2	tetraspanin 2 [Source:HGNC Symbol;Acc:HGNC:20659]
XLOC_020289	4:117579246-117616734	ENSSSCG00000006769	14.2142	4.72948	-1.58758	0.0037	0.12129	100127159	F1SBQ5	4:117603634-117614944	SLC16A1	monocarboxylate transporter 1 [Source:RefSeq peptide;Acc:NP_001121917]
XLOC_020314	4:119861001-119881553	ENSSSCG00000006802	3.04023	0.27834	-3.44926	0.00145	0.0645371	100156614	F1S626	4:119861134-119862900	KCNA3	potassium channel, voltage gated shaker related subfamily A, member 3 [Source:HGNC Symbol;Acc:HGNC:6221]
XLOC_020318	4:120319984-120351922	ENSSSCG00000006811	3.49403	0.915967	-1.93152	0.0123	0.256803	100156430	F1S617	4:120320347-120351691	-	-
XLOC_020325	4:121229988-121289567	ENSSSCG00000006831	14.0984	4.45837	-1.66094	0.00345	0.117063	-	F1S5Z7	4:121229989-121289559	SORT1	sortilin 1 [Source:HGNC Symbol;Acc:HGNC:11186]
XLOC_020342	4:128662662-128664191	-	9.11903	0	-inf	0.00235	0.0894387	-	-	-	-	-
XLOC_020363	4:134354687-134479916	ENSSSCG00000022447	170.711	27.0399	-2.6584	0.0003	0.0195183	-	I3LE68	4:134474325-134479725	F3	coagulation factor III (thromboplastin, tissue factor) [Source:HGNC Symbol;Acc:HGNC:3541]
XLOC_020371	4:136027154-136229086	ENSSSCG00000006901	3.66728	1.32389	-1.46992	0.0191	0.325603	-	I3LBL9,F1S4G1,I3L7K3	4:136027454-136224850	-	-
XLOC_020400	4:143171683-143209100	ENSSSCG00000006941	7.42312	1.81785	-2.02979	0.00245	0.091929	100153814	F1SEX0	4:143171684-143206264	DDAH1	dimethylarginine dimethylaminohydrolase 1 [Source:HGNC Symbol;Acc:HGNC:2715]
XLOC_020404	4:143327551-143337240	ENSSSCG00000026638	23.7565	11.2605	-1.07705	0.0366	0.431154	100153411	A7XP20	4:143327855-143336231	BCL10B	-
XLOC_020455	4:7979060-8510612	ENSSSCG00000005949	7.13625	0.64898	-3.45892	0.0239	0.366573	100626626,100156099,100154886	K7GT15,F1RRV2	4:8337195-8368428	SLA	-
XLOC_020488	4:17826115-17998525	-	5.43686	0.12355	-5.4596	0.0034	0.116481	-	-	-	-	-
XLOC_020490	4:18456736-18489450	ENSSSCG00000005992	19.5111	0.262246	-6.21723	0.02125	0.34723	397120	F1S290	4:18459354-18488950	SHAS2	-
XLOC_020496	4:20522555-20533993	ENSSSCG00000006002	5.00796	1.73264	-1.53125	0.02865	0.395974	100154395	F1S279	4:20522556-20533993	NOV	nephroblastoma overexpressed [Source:HGNC Symbol;Acc:HGNC:7885]
XLOC_020510	4:24038918-24205558	-	3.68622	0	-inf	0.02755	0.391126	-	-	-	-	-
XLOC_020657	4:78348302-78361247	-	18.1364	5.45736	-1.73261	0.03805	0.440912	-	-	-	-	-
XLOC_020660	4:79030903-79152742	ENSSSCG00000006231	1.63302	0.563647	-1.53467	0.02605	0.37882	100157083	F1RT88	4:79031984-79152558	CHD7	chromodomain helicase DNA binding protein 7 [Source:HGNC Symbol;Acc:HGNC:20626]
XLOC_020721	4:93486977-93490944	-	3.42049	0	-inf	0.04205	0.457369	-	-	-	-	-
XLOC_020740	4:96888985-96908244	ENSSSCG00000006350	28.5425	8.5215	-1.74393	0.01255	0.258973	613131	F1S1B4,F1S1C4,K7GR51,K7GM68,I3LGT0	4:96888986-96908203	FCGR2B	-
XLOC_020745	4:97099136-97103132	ENSSSCG00000006357	62.8597	21.8731	-1.52298	0.01025	0.23125	397406	Q9XSZ6,K7GMJ7,K7GRL7	4:97099150-97103132	FCER1G	High affinity immunoglobulin epsilon receptor subunit gamma [Source:UniProtKB/Swiss-Prot;Acc:Q9XSZ6]
XLOC_020753	4:97323049-97348522	ENSSSCG00000006369	19.243	8.16591	-1.23664	0.03125	0.408183	100127138	K7GQA1,B2ZI35	4:97323339-97348522	F11R	-
XLOC_020776	4:98626393-98630485	ENSSSCG00000006396	1.2751	0.351035	-1.86093	0.0436	0.462638	100625319	F1RJ91	4:98626394-98630485	IGSF9	immunoglobulin superfamily, member 9 [Source:HGNC Symbol;Acc:HGNC:18132]
XLOC_020779	4:98822722-98834109	ENSSSCG00000006398	0.782528	0.120849	-2.69494	0.0291	0.397881	100514958	K7GRB7,I3LD70,F1RJ81	4:98823544-98834109	SLAMF8	SLAM family member 8 [Source:HGNC Symbol;Acc:HGNC:21391]
XLOC_020874	4:104908114-104915210	ENSSSCG00000006578|ENSSSCG00000006579	62.5174	16.6657	-1.90738	0.02885	0.397014	100156358|100157925	F1SFV7,K7GRW3|K7GPL5,F1SFV6,K7GKF4	4:104908115-104911209|4:104909992-104915210	S100A4|S100A3	S100 calcium binding protein A4 [Source:HGNC Symbol;Acc:HGNC:10494]|-
XLOC_020882	4:105252705-105254388	-	2.18374	0	-inf	5e-05	0.00483523	-	-	-	-	-
XLOC_020913	4:107904415-107909631	ENSSSCG00000029230	41.2519	8.60283	-2.26158	0.00045	0.025875	-	I3LC64	4:107904738-107909631	ECM1	extracellular matrix protein 1 [Source:HGNC Symbol;Acc:HGNC:3153]
XLOC_020969	4:112907570-112934744	-	0.895586	0.189751	-2.23872	0.00315	0.109863	-	-	-	-	-
XLOC_020976	4:113708899-113799565	ENSSSCG00000006735	10.9312	3.34676	-1.70762	0.00615	0.16861	397023	K7GT55,F1SAY0	4:113709121-113799227	PTGFRN	prostaglandin F2 receptor inhibitor [Source:HGNC Symbol;Acc:HGNC:9601]
XLOC_020999	4:117771959-117788102	ENSSSCG00000006773	6.12854	1.05749	-2.5349	0.0095	0.222346	100153582	F1SBQ1	4:117783000-117785015	FAM19A3	family with sequence similarity 19 (chemokine (C-C motif)-like), member A3 [Source:HGNC Symbol;Acc:HGNC:21590]
XLOC_021014	4:119674095-119703427	ENSSSCG00000006800	98.3935	5.65326	-4.12141	5e-05	0.00483523	100152398	F1S628,K7GRC4,K7GLU8,K7GR84	4:119674096-119703427	CD53	CD53 molecule [Source:HGNC Symbol;Acc:HGNC:1686]
XLOC_021023	4:120417448-120445125	ENSSSCG00000027315	2.27364	0.628827	-1.85427	0.02455	0.369869	100738803	I3LRV7	4:120417449-120445125	-	-
XLOC_021069	4:129761869-129832535	ENSSSCG00000006872	2.54424	0.239652	-3.40823	5e-05	0.00483523	-	F1S557	4:129761870-129832535	AGL	amylo-alpha-1, 6-glucosidase, 4-alpha-glucanotransferase [Source:HGNC Symbol;Acc:HGNC:321]
XLOC_021071	4:129940633-129991123	ENSSSCG00000006874	15.2486	2.82473	-2.4325	0.00045	0.025875	654413	F1S554	4:129940634-129991123	PALMD	palmdelphin [Source:HGNC Symbol;Acc:HGNC:15846]
XLOC_021107	4:138671602-138757254	ENSSSCG00000024047	14.4679	5.54822	-1.38276	0.0094	0.220978	100152378,100737439	F1S4E5	4:138672479-138675055	-	-
XLOC_021109	4:138807372-138915819	ENSSSCG00000022090	14.8231	5.77671	-1.35953	0.01415	0.274673	100152378,100737439	F1S4E5	4:138808248-138810824	-	-
XLOC_021110	4:138996945-139077605	ENSSSCG00000006917	2.37343	0.344844	-2.78296	0.00155	0.0682738	100156403	F1S4E4	4:138996946-139077605	LRRC8C	leucine rich repeat containing 8 family, member C [Source:HGNC Symbol;Acc:HGNC:25075]
XLOC_021111	4:139107288-139177397	ENSSSCG00000022798	1.33422	0.314637	-2.08424	0.01415	0.274673	100155627	F1S4E3	4:139107289-139121900	LRRC8B	leucine rich repeat containing 8 family, member B [Source:HGNC Symbol;Acc:HGNC:30692]
XLOC_021127	4:142922530-142927649	ENSSSCG00000006940	76.3649	11.6825	-2.70856	0.0001	0.00857863	100153791	F1SEX1	4:142924366-142927632	CYR61	cysteine-rich, angiogenic inducer, 61 [Source:HGNC Symbol;Acc:HGNC:2654]
XLOC_021162	4:3122532-3123019	-	2.06292	0	-inf	0.0002	0.0143266	-	-	-	-	-
XLOC_021164	4:3254631-3255118	-	2.18131	0	-inf	0.0002	0.0143266	-	-	-	-	-
XLOC_021203	4:14902248-14903312	-	8.25259	2.06299	-2.00011	0.0079	0.20201	-	-	-	-	-
XLOC_021204	4:14903828-14906631	-	1.64055	0.0450228	-5.18738	0.0342	0.420095	-	-	-	-	-
XLOC_021215	4:16152001-16153039	-	9.53679	2.30321	-2.04986	0.00895	0.216869	-	-	-	-	-
XLOC_021226	4:18140561-18142323	-	0.827597	0	-inf	5e-05	0.00483523	-	-	-	-	-
XLOC_021263	4:44793169-44793434	-	804.176	36.7012	-4.45361	0.0006	0.0319925	-	-	-	-	-
XLOC_021312	4:70978684-70979030	-	23.8511	0	-inf	5e-05	0.00483523	-	-	-	-	-
XLOC_021372	4:89602396-89602833	-	9.7759	1.60905	-2.60302	0.0421	0.457679	-	-	-	-	-
XLOC_021497	4:129568971-129569907	-	5.72906	0.602696	-3.2488	0.01155	0.247458	-	-	-	-	-
XLOC_021552	5:2168832-2194690	ENSSSCG00000000025	5.96896	0.948504	-2.65375	0.01225	0.256515	100520379	F1SJU3	5:2169173-2193456	PARVG	parvin, gamma [Source:RefSeq peptide;Acc:NP_001231550]
XLOC_021620	5:8149171-8167615	ENSSSCG00000021944	3.1645	0.922415	-1.77849	0.02795	0.391208	100627149,100621675	I3LKU0	5:8149172-8167615	RAC3	ras-related C3 botulinum toxin substrate 1 (rho family, small GTP binding protein Rac1) [Source:RefSeq peptide;Acc:NP_001230514]
XLOC_021681	5:17064795-17187457	ENSSSCG00000029196	3.45608	1.32611	-1.38194	0.00935	0.220534	100626751	I3L8J8	5:17064796-17187457	DIP2B	disco-interacting protein 2 homolog B [Source:HGNC Symbol;Acc:HGNC:29284]
XLOC_021691	5:17901668-17939603	ENSSSCG00000000233	5.48568	1.93499	-1.50334	0.00935	0.220534	100152462	D3K5N5	5:17901709-17938189	ACVR1B	activin A receptor, type IB [Source:HGNC Symbol;Acc:HGNC:172]
XLOC_021820	5:26710237-26869814	ENSSSCG00000000456	2.18085	0.408214	-2.41749	0.002	0.0808935	100158241	F1SKD6	5:26810232-26867980	SLC16A7	solute carrier family 16 (monocarboxylate transporter), member 7 [Source:HGNC Symbol;Acc:HGNC:10928]
XLOC_021910	5:50468411-51037210	ENSSSCG00000000555	1.83925	0.411579	-2.15988	0.01405	0.273731	-	F1SG77	5:50595618-51021177	-	-
XLOC_021916	5:52504294-52625132	ENSSSCG00000029163	4.99184	0.961375	-2.3764	0.0003	0.0195183	-	I3LKW2	5:52535052-52594736	BCAT1	branched chain amino-acid transaminase 1, cytosolic [Source:HGNC Symbol;Acc:HGNC:976]
XLOC_021923	5:54818193-54944107	ENSSSCG00000000571	1.46039	0.423364	-1.78639	0.04545	0.471682	100127449	F1SR11	5:54823630-54944107	ABCC9	ATP-binding cassette, sub-family C (CFTR/MRP), member 9 [Source:HGNC Symbol;Acc:HGNC:60]
XLOC_021938	5:60237417-60286288	ENSSSCG00000000601	12.7036	0.533936	-4.57243	5e-05	0.00483523	100524563	F1SQX1,I3LLV5	5:60237490-60286288	PTPRO	protein tyrosine phosphatase, receptor type, O [Source:HGNC Symbol;Acc:HGNC:9678]
XLOC_021948	5:61434434-61443577	-	628.305	61.5983	-3.3505	5e-05	0.00483523	-	-	-	-	-
XLOC_021973	5:64755374-64769806	ENSSSCG00000000652	2.39159	0.15786	-3.92125	0.0318	0.409184	100520135	K7GRB3,F1SPC4	5:64755375-64769738	CLEC12A	C-type lectin domain family 12, member A [Source:RefSeq peptide;Acc:NP_001288598]
XLOC_021975	5:64909900-64917880	ENSSSCG00000000653	26.7426	0.564345	-5.56642	5e-05	0.00483523	397165	F1SPC2,F1SPC3	5:64909901-64917880	CD69	-
XLOC_021976	5:64936581-64956629	ENSSSCG00000000654	125.387	39.8623	-1.65329	0.03575	0.428014	100520491	F1SPC1,K7GSZ8	5:64938961-64956629	CLECL1	C-type lectin-like 1 [Source:HGNC Symbol;Acc:HGNC:24462]
XLOC_021986	5:65800871-65815289	ENSSSCG00000022925	58.3113	13.1687	-2.14667	0.0013	0.0590972	-	I3LG15	5:65800934-65810886	-	-
XLOC_022007	5:67005339-67078256	ENSSSCG00000000712	5.10358	1.29203	-1.98186	0.0068	0.181975	-	F1SL22,K7GNN0	5:67005340-67078256	VWF	von Willebrand factor [Source:HGNC Symbol;Acc:HGNC:12726]
XLOC_022039	5:71913801-71933780	-	171.629	22.6826	-2.91964	0.0189	0.32297	-	-	-	-	-
XLOC_022052	5:75521654-75878058	ENSSSCG00000000791	3.98316	0.62596	-2.66977	0.00215	0.0851792	100156795	F1SH06	5:75804960-75875193	PDZRN4	PDZ domain containing ring finger 4 [Source:HGNC Symbol;Acc:HGNC:30552]
XLOC_022064	5:78998337-79220108	ENSSSCG00000000804	7.2405	1.69615	-2.09383	0.02265	0.359343	100155593	F1SGY1	5:79126662-79217840	ANO6	anoctamin 6 [Source:HGNC Symbol;Acc:HGNC:25240]
XLOC_022091	5:82991324-83121502	ENSSSCG00000000838	4.01453	1.24726	-1.68647	0.0051	0.150073	100519603	F1SG43	5:83018171-83117985	SLC41A2	solute carrier family 41 (magnesium transporter), member 2 [Source:HGNC Symbol;Acc:HGNC:31045]
XLOC_022092	5:83657755-83701655	ENSSSCG00000000843	14.5153	6.74201	-1.10632	0.02215	0.355919	396681	F1SG38	5:83657864-83701655	TXNRD1	thioredoxin reductase 1, cytoplasmic [Source:RefSeq peptide;Acc:NP_999319]
XLOC_022123	5:87844570-87871049	ENSSSCG00000000874	0.86115	0.25455	-1.75832	0.04665	0.477153	100154381	F1SRH1,I3LR94	5:87851010-87870246	GAS2L3	growth arrest-specific 2 like 3 [Source:HGNC Symbol;Acc:HGNC:27475]
XLOC_022147	5:92302596-92478985	ENSSSCG00000000901	2.61103	0.427542	-2.61048	0.00145	0.0645371	-	F1SQP8	5:92308676-92474137	FGD6	FYVE, RhoGEF and PH domain containing 6 [Source:HGNC Symbol;Acc:HGNC:21740]
XLOC_022153	5:93227764-93529504	ENSSSCG00000000907	3.34748	0.522608	-2.67927	0.0476	0.481593	-	F1SQN2,K7GS93	5:93325752-93459904	PLXNC1	plexin C1 [Source:HGNC Symbol;Acc:HGNC:9106]
XLOC_022225	5:2460082-2461569	-	2.22332	0.299376	-2.89268	0.034	0.419594	-	-	-	-	-
XLOC_022294	5:8067182-8104676	ENSSSCG00000000130	9.1964	0.919223	-3.32258	0.0053	0.153203	100240722	F1SKL5	5:8072167-8104676	CYTH4	-
XLOC_022297	5:8415794-8440059	ENSSSCG00000000136	28.6476	1.14189	-4.64892	5e-05	0.00483523	100153254	F1SKK0	5:8415795-8440059	CSF2RB	colony stimulating factor 2 receptor, beta, low-affinity (granulocyte-macrophage) [Source:HGNC Symbol;Acc:HGNC:2436]
XLOC_022298	5:8474344-8497583	ENSSSCG00000000137	13.4292	4.66583	-1.52517	0.0341	0.419594	100152055	F1SKJ9,K7GLE0,K7GN17	5:8474345-8497583	NCF4	neutrophil cytosolic factor 4, 40kDa [Source:HGNC Symbol;Acc:HGNC:7662]
XLOC_022308	5:11962112-12019297	ENSSSCG00000000155	242.226	16.8956	-3.84163	0.02765	0.391126	-	F1SPS4	5:11965791-11975326	TIMP3	TIMP metallopeptidase inhibitor 3 [Source:HGNC Symbol;Acc:HGNC:11822]
XLOC_022309	5:12232229-12246779	-	1.80607	0	-inf	0.0002	0.0143266	-	-	-	-	-
XLOC_022310	5:12291434-12312996	ENSSSCG00000000156	33.6014	10.8283	-1.63371	0.01225	0.256515	100155281	D2WL17	5:12291435-12312996	FBXO7	F-box protein 7 [Source:HGNC Symbol;Acc:HGNC:13586]
XLOC_022348	5:16010997-16015664	ENSSSCG00000027376	16.9838	4.1359	-2.03788	0.00515	0.15071	102157898	I3LR14	5:16010998-16015664	-	-
XLOC_022375	5:18223850-18226402	ENSSSCG00000000244	2.01656	0.0921915	-4.45112	0.0133	0.266188	100524561	P43030	5:18223851-18226402	PPBP	Platelet basic protein [Source:UniProtKB/Swiss-Prot;Acc:P43030]
XLOC_022378	5:18303983-18306135	ENSSSCG00000000246	47.4861	0.59605	-6.31593	0.0002	0.0143266	100525528,100525396	F1SGG8	5:18303984-18306130	-	-
XLOC_022388	5:18663338-18671193	ENSSSCG00000000252	18.1438	5.93684	-1.61171	0.03215	0.4113	100152077	F1SGG2	5:18663339-18671193	KRT8	-
XLOC_022414	5:20409995-20411880	ENSSSCG00000000291	7.24222	0.453159	-3.99834	0.01975	0.331112	-	-	5:20410225-20411195	-	-
XLOC_022416	5:20442127-20465312	ENSSSCG00000000293	88.4131	16.4785	-2.42368	0.00835	0.209736	100155091	K7GNZ0,K7GSS6,K7GRL8,F1SR53	5:20442128-20465312	ITGA5	integrin, alpha 5 (fibronectin receptor, alpha polypeptide) [Source:HGNC Symbol;Acc:HGNC:6141]
XLOC_022422	5:20677943-20695280	ENSSSCG00000000295	6.0675	1.11111	-2.4491	0.00405	0.127839	-	F1SR51	5:20677944-20695280	-	-
XLOC_022424	5:20836509-20879697	ENSSSCG00000000299	0.804757	0.0779029	-3.36881	0.0059	0.164944	100153079	F1SR47	5:20849781-20879668	TESPA1	thymocyte expressed, positive selection associated 1 [Source:HGNC Symbol;Acc:HGNC:29109]
XLOC_022451	5:22759687-22766111	ENSSSCG00000000368	17.2243	4.90561	-1.81194	0.0084	0.21	100518427	F1SPJ1	5:22759690-22765948	MMP19	matrix metallopeptidase 19 [Source:HGNC Symbol;Acc:HGNC:7165]
XLOC_022496	5:24286945-24309681	ENSSSCG00000023150	11.4664	2.00887	-2.51295	0.0032	0.11106	100514839,100739699	K7GS03,I3LMD6,M9MMN8,I3LG92	5:24186534-24336347	LRP1	low density lipoprotein receptor-related protein 1 [Source:HGNC Symbol;Acc:HGNC:6692]
XLOC_022517	5:32134174-32173480	ENSSSCG00000023715	35.8155	7.34303	-2.28614	5e-05	0.00483523	-	I3L643	5:32134175-32173480	-	-
XLOC_022536	5:36179189-36185575	ENSSSCG00000000492	379.899	51.3367	-2.88756	0.0016	0.0698973	100157211	K7GNT1,P12068,K7GPL3	5:36179190-36185575	LYZ	Lysozyme C-2 [Source:UniProtKB/Swiss-Prot;Acc:P12068]
XLOC_022555	5:42800120-42879633	ENSSSCG00000000521	98.3736	13.1084	-2.90778	0.00585	0.164194	100523904	F1SGD8	5:42877526-42878692	PHLDA1	pleckstrin homology-like domain, family A, member 1 [Source:HGNC Symbol;Acc:HGNC:8933]
XLOC_022589	5:51470829-51561585	ENSSSCG00000000559	9.6528	4.45356	-1.11599	0.0228	0.36062	100151839	F1SG73	5:51474929-51554507	RASSF8	Ras association (RalGDS/AF-6) domain family (N-terminal) member 8 [Source:HGNC Symbol;Acc:HGNC:13232]
XLOC_022623	5:61330541-61373985	ENSSSCG00000027602	382.86	17.8329	-4.42421	5e-05	0.00483523	-	I3LCG5	5:61337116-61373313	PLBD1	phospholipase B domain containing 1 [Source:HGNC Symbol;Acc:HGNC:26215]
XLOC_022637	5:64542858-64556419	ENSSSCG00000000648	23.2546	1.99106	-3.54591	0.0034	0.116481	100038025	K7GQI1,F1SPE2,F1SPE0,F1SPE1	5:64542869-64556408	CLEC7A	C-type lectin domain family 7, member A [Source:HGNC Symbol;Acc:HGNC:14558]
XLOC_022638	5:64579162-64590512	ENSSSCG00000000647	12.5349	1.55912	-3.00715	5e-05	0.00483523	396724	F1SPE3	5:64579163-64590512	OLR1	-
XLOC_022664	5:66326076-66352898	ENSSSCG00000000687	2.39632	0.219057	-3.45144	0.004	0.126637	404704	F1SLT5,F1SLT4	5:66326563-66352898	CD4	-
XLOC_022686	5:68214487-68287031	ENSSSCG00000024219	6.34612	2.80602	-1.17735	0.0465	0.476535	100154112	F1SKZ0	5:68266578-68280421	TIGAR	TP53 induced glycolysis regulatory phosphatase [Source:HGNC Symbol;Acc:HGNC:1185]
XLOC_022687	5:68309674-68332134	ENSSSCG00000000727	21.0607	3.9832	-2.40256	0.00135	0.0607215	-	F1SKY9	5:68314898-68331943	CCND2	cyclin D2 [Source:HGNC Symbol;Acc:HGNC:1583]
XLOC_022721	5:73929816-74346512	ENSSSCG00000000783|ENSSSCG00000024523	3.49901	0.83437	-2.06819	0.0082	0.206456	-|-	F1SHN8|K7GRK4,I3LPJ8	5:74204204-74346512|5:73929817-74023533	-|SLC2A13	-|-
XLOC_022726	5:75510489-75519735	-	1.32705	0.048458	-4.77534	0.0455	0.471971	-	-	-	-	-
XLOC_022740	5:80650252-80791947	ENSSSCG00000000810	39.5078	3.76556	-3.3912	0.0003	0.0195183	100152349	F1SGW7	5:80651422-80652987	AMIGO2	adhesion molecule with Ig-like domain 2 [Source:HGNC Symbol;Acc:HGNC:24073]
XLOC_022744	5:81277765-81360259	ENSSSCG00000020864	12.3298	0.641395	-4.26479	0.0001	0.00857863	396628	A3RGC1	5:81277766-81339276	VDR	Vitamin D3 receptor [Source:UniProtKB/Swiss-Prot;Acc:A3RGC1]
XLOC_022766	5:83184938-83578367	ENSSSCG00000000837	11.1098	0.739083	-3.90995	5e-05	0.00483523	-	F1SG44	5:83189141-83577394	CHST11	carbohydrate (chondroitin 4) sulfotransferase 11 [Source:HGNC Symbol;Acc:HGNC:17422]
XLOC_022777	5:86256057-86270669	-	6.55504	0.726134	-3.1743	0.01815	0.315217	-	-	-	-	-
XLOC_022794	5:89443053-89581082	ENSSSCG00000000884	7.61002	2.81803	-1.43321	0.0265	0.382488	100513283	K7GSD7,F1SQT5	5:89443057-89581082	APAF1	apoptotic peptidase activating factor 1 [Source:HGNC Symbol;Acc:HGNC:576]
XLOC_022801	5:91504837-91536271	ENSSSCG00000023803	8.00548	3.67348	-1.12384	0.0295	0.398737	100622445	I3L8C1	5:91504838-91536271	ELK3	ELK3, ETS-domain protein (SRF accessory protein 2) [Source:HGNC Symbol;Acc:HGNC:3325]
XLOC_022981	5:24151217-24152489	-	2.7041	0.477683	-2.50102	0.03425	0.420224	-	-	-	-	-
XLOC_022991	5:30068324-30071679	-	1.60443	0.405438	-1.98451	0.0101	0.229816	-	-	-	-	-
XLOC_022992	5:30385004-30385247	-	504.471	20.0292	-4.6546	0.00705	0.18609	-	-	-	-	-
XLOC_023044	5:49852014-49856457	-	2.41373	0.740205	-1.70527	0.00665	0.179087	-	-	-	-	-
XLOC_023064	5:61410333-61411454	-	3.36453	0.383386	-3.13354	0.0186	0.319125	-	-	-	-	-
XLOC_023142	5:88701038-88701567	-	2.2988	0	-inf	0.0001	0.00857863	-	-	-	-	-
XLOC_023163	5:98018157-98018845	-	4.4182	0	-inf	5e-05	0.00483523	-	-	-	-	-
XLOC_023206	6:1372902-1387581	-	3.12514	0.423248	-2.88435	0.00735	0.192102	-	-	-	-	-
XLOC_023207	6:1387713-1396204	-	1.86365	0.0672535	-4.79237	0.00185	0.0762766	-	-	-	-	-
XLOC_023299	6:17159490-17195781	ENSSSCG00000002820	5.98764	2.67189	-1.16413	0.04455	0.467127	100515835	F1RF31	6:17159491-17195722	RSPRY1	ring finger and SPRY domain containing 1 [Source:HGNC Symbol;Acc:HGNC:29420]
XLOC_023302	6:17304112-17316246	ENSSSCG00000024759	3.34562	0.572711	-2.54639	0.0005	0.0279934	100621027	I3L9Z6	6:17304113-17313899	CX3CL1	chemokine (C-X3-C motif) ligand 1 [Source:HGNC Symbol;Acc:HGNC:10647]
XLOC_023309	6:17648231-17669732	ENSSSCG00000002815	9.49476	1.65658	-2.51892	0.0075	0.194826	-	F1RF36	6:17648232-17669499	ADGRG1	adhesion G protein-coupled receptor G1 [Source:HGNC Symbol;Acc:HGNC:4512]
XLOC_023310	6:17679846-17699546	ENSSSCG00000002814	0.921302	0.0877723	-3.39184	0.0237	0.36564	-	F1RF37	6:17679847-17699546	ADGRG3	adhesion G protein-coupled receptor G3 [Source:HGNC Symbol;Acc:HGNC:13728]
XLOC_023347	6:26043346-26056563	ENSSSCG00000027470	11.2257	4.15547	-1.43372	0.0415	0.457293	-	I3LEN9	6:26043347-26056563	-	solute carrier family 12 member 4 [Source:RefSeq peptide;Acc:NP_999114]
XLOC_023379	6:33186879-33366369	ENSSSCG00000002849	6.32082	0.435161	-3.86049	0.041	0.455496	100522493	F1RP02	6:33218782-33224708	-	-
XLOC_023563	6:47198291-47210379	ENSSSCG00000020657	57.6434	24.6937	-1.22301	0.02985	0.400921	100738241	I3L9I6,K7GPM6	6:47198292-47210379	BCAM	basal cell adhesion molecule (Lutheran blood group) [Source:HGNC Symbol;Acc:HGNC:6722]
XLOC_023588	6:48523113-48556702	ENSSSCG00000003113	8.22637	1.83815	-2.162	0.0186	0.319125	100515612	F1RLZ0	6:48550461-48551474	C5AR2	complement component 5a receptor 2 [Source:HGNC Symbol;Acc:HGNC:4527]
XLOC_023623	6:49919338-49922837	ENSSSCG00000003155	31.6801	12.8542	-1.30134	0.01925	0.32659	100522679	F1RIN9	6:49919339-49922833	PPP1R15A	protein phosphatase 1, regulatory subunit 15A [Source:HGNC Symbol;Acc:HGNC:14375]
XLOC_023658	6:51121779-51129612	-	3.10419	0.158861	-4.28838	0.03205	0.410761	-	-	-	-	-
XLOC_023665	6:51581556-51601034	ENSSSCG00000003226	10.4557	3.26573	-1.67881	0.01775	0.311577	-	K7GKF5,F1RP96,K7GMR3,K7GRW5	6:51581782-51600200	CD33	-
XLOC_023702	6:53579759-53586709	-	21.439	1.28481	-4.06062	5e-05	0.00483523	-	-	-	-	-
XLOC_023703	6:53597024-53604526	-	4.63738	0.533405	-3.12001	0.0004	0.0238375	-	-	-	-	-
XLOC_023709	6:53763039-53775729	ENSSSCG00000003278|ENSSSCG00000029446	15.6579	0.537896	-4.86342	0.00045	0.025875	100511639|100512054	F1RNE8|I3LU75	6:53768201-53774819|6:53763040-53764389	-|-	leukocyte immunoglobulin-like receptor subfamily B member 3-like isoform 1 precursor [Source:RefSeq peptide;Acc:NP_001230801]|-
XLOC_023711	6:53902903-53909810	ENSSSCG00000029231	18.4069	1.20595	-3.93201	5e-05	0.00483523	100624191,100517099	I3L7I4	6:53902904-53909080	PigE-108A11.6	-
XLOC_023712	6:53920125-53927619	ENSSSCG00000030433	17.7212	1.95211	-3.18237	0.00045	0.025875	-	I3LD26,I3LS42,K7GLB2,K7GMU0,K7GQQ6	6:53920942-53924731	PigE-108A11.5	-
XLOC_023785	6:58044825-58047465	ENSSSCG00000027991	4.15874	0.6139	-2.76007	0.009	0.217338	-	I3LLJ5	6:58045649-58047446	SCNN1D	sodium channel, non voltage gated 1 delta subunit [Source:HGNC Symbol;Acc:HGNC:10601]
XLOC_023817	6:61866277-61874532	ENSSSCG00000029499	5.9914	2.31177	-1.37389	0.01315	0.266188	397248	I3LH48	6:61866278-61874532	-	-
XLOC_023842	6:64444215-64605515	ENSSSCG00000003401	10.3429	3.0724	-1.7512	0.00555	0.157856	100525927	F1RIF9	6:64444216-64593489	KIF1B	kinesin family member 1B [Source:HGNC Symbol;Acc:HGNC:16636]
XLOC_023863	6:66137696-66140955	-	2.38824	0.42114	-2.50358	0.0106	0.236141	-	-	-	-	-
XLOC_023878	6:68568549-68735048	ENSSSCG00000003454	6.23128	2.68337	-1.21548	0.03195	0.410221	100520199	F1SUX8	6:68659247-68735048	KAZN	kazrin, periplakin interacting protein [Source:HGNC Symbol;Acc:HGNC:29173]
XLOC_023882	6:69032926-69049580	ENSSSCG00000003458	48.5999	22.081	-1.13815	0.0232	0.362908	100520743	F1SUW3	6:69032927-69049580	EFHD2	EF-hand domain family, member D2 [Source:HGNC Symbol;Acc:HGNC:28670]
XLOC_023912	6:73017554-73042847	ENSSSCG00000021259	20.1113	1.65536	-3.60279	5e-05	0.00483523	100515954	I3LAH9	6:73017555-73042847	CDA	-
XLOC_023914	6:73169630-73183025	ENSSSCG00000003509	1.04127	0.103308	-3.33332	0.0072	0.189111	100515781	F1SU08	6:73174247-73182852	SH2D5	SH2 domain containing 5 [Source:HGNC Symbol;Acc:HGNC:28819]
XLOC_023917	6:73884211-73902855	-	13.6736	2.11293	-2.69408	0.0018	0.0750882	-	-	-	-	-
XLOC_023918	6:73920938-73947323	ENSSSCG00000003514	18.3613	5.0274	-1.86879	0.00555	0.157856	-	F1SU03	6:73920982-73947323	-	-
XLOC_023942	6:76099642-76192726	ENSSSCG00000022314	41.1181	17.0366	-1.27114	0.03535	0.426344	-	I3L8R1	6:76099643-76192726	-	-
XLOC_023956	6:77442984-77480009	ENSSSCG00000003558	15.13	3.71639	-2.02544	0.0295	0.398737	100523972	F1STS3	6:77442985-77479999	RPS6KA1	ribosomal protein S6 kinase, 90kDa, polypeptide 1 [Source:RefSeq peptide;Acc:NP_001230143]
XLOC_023975	6:78550594-78568631	ENSSSCG00000003584	2.14469	0.354892	-2.59532	0.0069	0.183957	100514466	F1STM8,I3LIN3	6:78550595-78568631	THEMIS2	thymocyte selection associated family member 2 [Source:HGNC Symbol;Acc:HGNC:16839]
XLOC_023976	6:78600671-78683735	ENSSSCG00000003582|ENSSSCG00000030623	20.4071	1.97513	-3.36905	0.01285	0.262616	100514109|-	F1STN0|F1STN1	6:78600672-78624777|6:78625554-78634904	SMPDL3B|XKR8	sphingomyelin phosphodiesterase, acid-like 3B [Source:HGNC Symbol;Acc:HGNC:21416]|XK, Kell blood group complex subunit-related family, member 8 [Source:HGNC Symbol;Acc:HGNC:25508]
XLOC_024059	6:88931084-88945397	ENSSSCG00000003669	10.7924	0.802738	-3.74894	0.0004	0.0238375	100518612	F1SMC3	6:88931085-88945397	MFSD2A	major facilitator superfamily domain containing 2A [Source:HGNC Symbol;Acc:HGNC:25897]
XLOC_024060	6:89004568-89025802	ENSSSCG00000026857	15.1151	6.47471	-1.22311	0.03335	0.416925	-	I3LVT1	6:89021503-89024892	-	-
XLOC_024061	6:89101260-89120974	ENSSSCG00000003671	114.496	54.3374	-1.07528	0.0286	0.395974	100621457	F1SMC1	6:89101261-89120974	-	-
XLOC_024075	6:90781573-90795956	ENSSSCG00000024644	14.4557	1.24972	-3.53196	0.00025	0.0168849	100127171,102159980	I3LED4	6:90781633-90795956	CIDEA	Sus scrofa cell death-inducing DFFA-like effector a (CIDEA), mRNA. [Source:RefSeq mRNA;Acc:NM_001112696]
XLOC_024088	6:93932347-93937423	-	9.30914	0.181894	-5.67748	0.0393	0.448556	-	-	-	-	-
XLOC_024098	6:96675545-96679101	-	7.7126	1.52277	-2.34052	0.0252	0.373051	-	-	-	-	-
XLOC_024115	6:100883281-100897872	ENSSSCG00000029518	6.72578	2.23154	-1.59166	0.0115	0.247458	-	I3LQC0	6:100883282-100897872	RIOK3	RIO kinase 3 [Source:HGNC Symbol;Acc:HGNC:11451]
XLOC_024134	6:107485628-107491764	ENSSSCG00000003725	4.48934	0.606795	-2.88722	0.0005	0.0279934	-	F1SAM1	6:107485629-107489773	-	-
XLOC_024138	6:108012312-108081933	ENSSSCG00000022739	1.43724	0.555221	-1.37217	0.04465	0.467485	-	I3LIM4,I3L6D7	6:108046594-108081930	DSG2	desmoglein 2 [Source:HGNC Symbol;Acc:HGNC:3049]
XLOC_024162	6:119073538-119085956	ENSSSCG00000003753	345.537	57.9337	-2.57637	0.0002	0.0143266	414756	F1SAG7	6:119074021-119079491	-	-
XLOC_024197	6:133711322-133828050	ENSSSCG00000003795	13.7993	3.59415	-1.94087	0.00235	0.0894387	-	F1S829	6:133752325-133820951	WLS	wntless Wnt ligand secretion mediator [Source:HGNC Symbol;Acc:HGNC:30238]
XLOC_024201	6:134870451-134915576	ENSSSCG00000003805	6.15052	1.25852	-2.28898	0.00105	0.0498633	100037941	F1S820	6:134870923-134913618	PDE4B	cAMP-specific 3',5'-cyclic phosphodiesterase 4B isoform 1 [Source:RefSeq peptide;Acc:NP_001123491]
XLOC_024206	6:138014363-138173118	ENSSSCG00000003818	1.31505	0.419694	-1.64771	0.0465	0.476535	-	F1S7Z8	6:138042658-138172957	DOCK7	dedicator of cytokinesis 7 [Source:HGNC Symbol;Acc:HGNC:19190]
XLOC_024223	6:144064140-144067751	-	6.41165	0	-inf	5e-05	0.00483523	-	-	-	-	-
XLOC_024241	6:147007231-147077810	ENSSSCG00000003853	29.2962	3.21816	-3.18641	0.0016	0.0698973	-	F1S762	6:147007232-147077810	-	non-specific lipid-transfer protein [Source:RefSeq peptide;Acc:NP_001161887]
XLOC_024251	6:147898115-147958856	ENSSSCG00000021036	1.9218	0.528823	-1.8616	0.01685	0.302773	100514585	F1S6G3,I3LHP6	6:147898116-147958856	RAB3B	RAB3B, member RAS oncogene family [Source:HGNC Symbol;Acc:HGNC:9778]
XLOC_024326	6:155981970-156020069	ENSSSCG00000026635	18.809	3.95165	-2.25089	0.00355	0.118939	-	I3L5Z2	6:155982964-155985301	-	-
XLOC_024367	6:1669483-1679331	-	1.87363	0.0761637	-4.62059	0.0002	0.0143266	-	-	-	-	-
XLOC_024374	6:3330464-3340184	-	3.30887	0.320389	-3.36844	0.02935	0.398398	-	-	-	-	-
XLOC_024390	6:6994096-7074769	ENSSSCG00000002688	2.04074	0.410116	-2.31499	0.00945	0.221419	-	F1S475	6:6994097-7068918	-	-
XLOC_024391	6:7181089-7278936	ENSSSCG00000002689	13.5734	5.04596	-1.42758	0.0053	0.153203	-	F1S474	6:7183374-7278279	CMIP	c-Maf inducing protein [Source:HGNC Symbol;Acc:HGNC:24319]
XLOC_024433	6:14181372-14196409	ENSSSCG00000022502	1.45535	0.389235	-1.90265	0.0082	0.206456	-	I3LHG3	6:14183839-14184678	-	-
XLOC_024456	6:17342469-17345459	ENSSSCG00000023852	188.668	1.47739	-6.99666	0.00055	0.0301579	-	I3L8X8	6:17342470-17345459	CCL17	chemokine (C-C motif) ligand 17 [Source:HGNC Symbol;Acc:HGNC:10615]
XLOC_024530	6:38328022-38417716	ENSSSCG00000022312	6.67206	2.3496	-1.50572	0.0084	0.21	100620673	I3LHE7,I3LRU1	6:38328023-38417716	RHPN2	rhophilin, Rho GTPase binding protein 2 [Source:HGNC Symbol;Acc:HGNC:19974]
XLOC_024543	6:40281282-40285966	ENSSSCG00000002881	14.5789	0.518494	-4.81341	0.00105	0.0498633	100126285	F1RM81	6:40282039-40283031	FFAR2	free fatty acid receptor 2 [Source:HGNC Symbol;Acc:HGNC:4501]
XLOC_024558	6:40711872-40716524	ENSSSCG00000002919	221.274	72.8323	-1.60318	0.0271	0.387468	397405	Q9TU45	6:40711873-40715184	TYROBP	TYRO protein tyrosine kinase binding protein [Source:HGNC Symbol;Acc:HGNC:12449]
XLOC_024584	6:42815862-42833749	ENSSSCG00000002960	1.89771	0.405498	-2.22649	0.0315	0.409135	100516199	F1RI45,K7GMW2	6:42820748-42833686	RASGRP4	RAS guanyl releasing protein 4 [Source:HGNC Symbol;Acc:HGNC:18958]
XLOC_024585	6:42960190-43026776	ENSSSCG00000002962	4.31175	1.10263	-1.96732	0.04555	0.472259	100516374	F1RI42	6:42960282-43026776	MAP4K1	mitogen-activated protein kinase kinase kinase kinase 1 [Source:HGNC Symbol;Acc:HGNC:6863]
XLOC_024631	6:45070537-45071741	ENSSSCG00000026296	101.096	16.1989	-2.64175	0.0066	0.178418	-	I3LDK6	6:45070837-45071190	-	-
XLOC_024632	6:45074879-45141424	ENSSSCG00000003017	140.116	17.817	-2.9753	0.0395	0.44972	-	F1RH82,K7GQZ2	6:45127027-45139176	TGFB1	transforming growth factor beta-1 precursor [Source:RefSeq peptide;Acc:NP_999180]
XLOC_024657	6:46349480-46365407	ENSSSCG00000003065	52.733	7.12223	-2.8883	5e-05	0.00483523	100521017	K7GNK9,K7GKW3,F1RMV4	6:46349481-46365407	PLAUR	plasminogen activator, urokinase receptor [Source:HGNC Symbol;Acc:HGNC:9053]
XLOC_024671	6:46996017-47038750	ENSSSCG00000003079	29.3356	2.16999	-3.75689	0.02395	0.366573	100525346	F1RMT1,K7GR94	6:47025630-47036912	PVR	poliovirus receptor [Source:HGNC Symbol;Acc:HGNC:9705]
XLOC_024672	6:47039800-47066290	ENSSSCG00000003080	35.2771	1.08463	-5.02346	0.00075	0.0383564	-	F1RMS9	6:47050122-47057994	IGSF23	immunoglobulin superfamily, member 23 [Source:HGNC Symbol;Acc:HGNC:40040]
XLOC_024768	6:51692515-51695384	ENSSSCG00000003231	10.7529	3.79194	-1.50372	0.01805	0.31425	100513287	F1RP91,K7GPI2,K7GKD9	6:51692516-51695384	NKG7	-
XLOC_024774	6:51804885-51825376	ENSSSCG00000003236	4.03992	0.790234	-2.35397	0.00775	0.199856	100514653	F1RP86	6:51805504-51825376	SIGLEC5	-
XLOC_024790	6:52741058-52763504	ENSSSCG00000003251	2.88956	0.0749221	-5.26932	0.00025	0.0168849	100523066	F1RNK5	6:52741952-52763479	NLRP12	NLR family, pyrin domain containing 12 [Source:HGNC Symbol;Acc:HGNC:22938]
XLOC_024929	6:62967904-62978408	-	79.2213	16.9275	-2.22652	0.0041	0.129035	-	-	-	-	-
XLOC_024936	6:63928190-63931918	-	7.56004	2.56569	-1.55905	0.0162	0.297887	-	-	-	-	-
XLOC_024977	6:69567126-69595069	ENSSSCG00000003471	14.8311	2.27743	-2.70315	5e-05	0.00483523	100522873	F1SUT8	6:69567127-69595069	EPHA2	EPH receptor A2 [Source:HGNC Symbol;Acc:HGNC:3386]
XLOC_024986	6:70039585-70099223	ENSSSCG00000026478	1.28604	0.246874	-2.38109	0.0269	0.385126	100621356	I3LNE4	6:70039586-70099223	PADI2	peptidyl arginine deiminase, type II [Source:HGNC Symbol;Acc:HGNC:18341]
XLOC_024992	6:71614913-71632568	ENSSSCG00000022408	3.32801	0.626604	-2.40903	0.0108	0.238598	102161705	I3L5Y4	6:71614914-71632568	-	-
XLOC_025012	6:73659672-73781950	ENSSSCG00000003513	20.4883	7.00836	-1.54765	0.03495	0.422959	397446	F1SU04	6:73662021-73717839	ECE1	endothelin converting enzyme 1 [Source:HGNC Symbol;Acc:HGNC:3146]
XLOC_025015	6:73906483-73912991	-	9.71025	0	-inf	5e-05	0.00483523	-	-	-	-	-
XLOC_025023	6:75075114-75109378	ENSSSCG00000003532	5.25827	1.97957	-1.4094	0.0118	0.250794	100620499	I3LNF8	6:75075115-75102946	LUZP1	leucine zipper protein 1 [Source:HGNC Symbol;Acc:HGNC:14985]
XLOC_025054	6:77942525-77997556	ENSSSCG00000003569	4.58982	1.8341	-1.32337	0.0409	0.455336	397458	F1STQ3	6:77942526-77997556	SLC9A1	-
XLOC_025060	6:78326156-78358303	ENSSSCG00000003578	10.9188	1.32274	-3.04521	0.04985	0.489159	-	F1STN5	6:78326491-78358088	FGR	FGR proto-oncogene, Src family tyrosine kinase [Source:HGNC Symbol;Acc:HGNC:3697]
XLOC_025081	6:81068823-81095480	ENSSSCG00000025034	69.5846	16.1868	-2.10395	0.00095	0.0461444	100624193	I3L9C0	6:81070177-81095159	LAPTM5	lysosomal protein transmembrane 5 [Source:HGNC Symbol;Acc:HGNC:29612]
XLOC_025110	6:83246407-83277627	ENSSSCG00000025206	36.5028	6.06706	-2.58894	0.01085	0.238958	100621544	I3LHA9	6:83253110-83277474	RNF19B	ring finger protein 19B [Source:HGNC Symbol;Acc:HGNC:26886]
XLOC_025116	6:84787357-84801205	-	3.15208	0.678034	-2.21687	0.00605	0.167378	-	-	-	-	-
XLOC_025151	6:88887684-88894495	ENSSSCG00000003668	4.2615	0.482827	-3.14178	5e-05	0.00483523	-	F1SMC4	6:88889849-88894495	MYCL	v-myc avian myelocytomatosis viral oncogene lung carcinoma derived homolog [Source:HGNC Symbol;Acc:HGNC:7555]
XLOC_025177	6:92351813-92463458	ENSSSCG00000003684	2.3583	0.745476	-1.66151	0.0235	0.364139	-	F1SM90,I3LA85	6:92351814-92436829	MTCL1	microtubule crosslinking factor 1 [Source:HGNC Symbol;Acc:HGNC:29121]
XLOC_025182	6:92928628-93116241	ENSSSCG00000029947	7.83588	1.11467	-2.81348	0.00745	0.194001	-	I3LJR8	6:92947611-92979095	-	-
XLOC_025186	6:94746511-94885599	ENSSSCG00000003687	4.90587	1.28436	-1.93347	0.02785	0.391208	100520913	F1SM86	6:94749953-94835636	EPB41L3	erythrocyte membrane protein band 4.1-like 3 [Source:HGNC Symbol;Acc:HGNC:3380]
XLOC_025192	6:96738828-96792567	ENSSSCG00000003694	18.087	5.41845	-1.739	0.00355	0.118939	-	F1SBC8	6:96738829-96792567	EMILIN2	elastin microfibril interfacer 2 [Source:HGNC Symbol;Acc:HGNC:19881]
XLOC_025222	6:105222227-105519491	ENSSSCG00000003722	37.0535	2.58932	-3.83896	0.0005	0.0279934	-	K7GLI7,K7GPI7,F1SAM3,K7GT48,K7GSQ7	6:105223854-105518711	CDH2	cadherin 2, type 1, N-cadherin (neuronal) [Source:HGNC Symbol;Acc:HGNC:1759]
XLOC_025412	6:156023327-156120994	ENSSSCG00000027330	12.2375	2.05476	-2.57426	0.0109	0.239564	-	I3LGB8	6:156057266-156059078	-	-
XLOC_025466	6:3356518-3358765	-	4.39225	1.32506	-1.7289	0.03255	0.413187	-	-	-	-	-
XLOC_025477	6:6885016-6885361	-	25.397	0	-inf	5e-05	0.00483523	-	-	-	-	-
XLOC_025485	6:8299045-8299825	-	1.71158	0	-inf	5e-05	0.00483523	-	-	-	-	-
XLOC_025572	6:34190960-34192024	-	0.890016	0	-inf	5e-05	0.00483523	-	-	-	-	-
XLOC_025629	6:45069651-45070258	-	35.3317	3.16811	-3.47927	0.01225	0.256515	-	-	-	-	-
XLOC_025654	6:50593314-50594300	-	9.91442	2.87958	-1.78367	0.01715	0.305583	-	-	-	-	-
XLOC_025731	6:63117152-63120858	-	12.75	4.1108	-1.633	0.00205	0.0821351	-	-	-	-	-
XLOC_025773	6:76249757-76252094	-	1.39077	0.189126	-2.87847	0.0117	0.249666	-	-	-	-	-
XLOC_025850	6:101520694-101520921	-	59.7693	0	-inf	0.0006	0.0319925	-	-	-	-	-
XLOC_025886	6:129159428-129159668	-	67.8795	3.1088	-4.44855	0.04805	0.482883	-	-	-	-	-
XLOC_025976	6:156779683-156782671	-	1.61416	0	-inf	5e-05	0.00483523	-	-	-	-	-
XLOC_026008	7:3672184-3739403	ENSSSCG00000025199|ENSSSCG00000027136	11.1568	2.5866	-2.10879	0.00075	0.0383564	-|-	F1RWW8|I3LA97	7:3703368-3739403|7:3672185-3696076	-|-	-|-
XLOC_026024	7:8135082-8145214	ENSSSCG00000023956	5.591	1.33355	-2.06784	0.00205	0.0821351	100738669	I3LB36	7:8135083-8145214	-	-
XLOC_026027	7:9152652-9159251	ENSSSCG00000001050	3.7341	1.06125	-1.815	0.0226	0.358817	396915	F1RV83	7:9152653-9159251	EDN1	endothelin 1 [Source:HGNC Symbol;Acc:HGNC:3176]
XLOC_026029	7:9509244-9957956	ENSSSCG00000001052	6.43575	1.03755	-2.63292	0.00015	0.0115208	-	F1RV81	7:9509245-9954959	PHACTR1	phosphatase and actin regulator 1 [Source:HGNC Symbol;Acc:HGNC:20990]
XLOC_026040	7:13453878-13471693	-	5.90755	2.39163	-1.30456	0.0245	0.369869	-	-	-	-	-
XLOC_026063	7:21336386-21653398	ENSSSCG00000001100	6.80967	1.92033	-1.82623	0.00965	0.224621	100157771	F1RTQ8	7:21468020-21653398	LRRC16A	leucine rich repeat containing 16A [Source:HGNC Symbol;Acc:HGNC:21581]
XLOC_026073	7:22094864-22096313	ENSSSCG00000023149	22.5428	2.6515	-3.08779	0.00925	0.220086	100158121,100157763	F2Z575	7:22094865-22095327	HIST1H2AC	-
XLOC_026088	7:23085831-23165252	ENSSSCG00000026668|ENSSSCG00000026930	15.3456	3.57423	-2.10212	0.0423	0.458346	100156932|100621915	F2Z580|F2Z579	7:23097502-23097882|7:23110613-23164791	-|HIST1H2BN	-|histone cluster 1, H2bn [Source:HGNC Symbol;Acc:HGNC:4749]
XLOC_026205	7:27853615-27859428	ENSSSCG00000001418	20.6488	9.01918	-1.19499	0.03075	0.406243	100124381	F1RQX3	7:27853782-27858037	NEU1	-
XLOC_026213	7:29036551-29042147	ENSSSCG00000001453	239.506	59.7845	-2.00222	0.00885	0.215428	100135040	Q85ZW4	7:29036552-29042147	SLA-DRA	-
XLOC_026214	7:29164955-29170803	ENSSSCG00000001456	214.663	31.577	-2.76513	0.00055	0.0301579	100153387	Q7YQ94	7:29164956-29170803	SLA-DQA	-
XLOC_026215	7:29205457-29212886	ENSSSCG00000001458	4.85729	0.963399	-2.33395	0.025	0.372424	-	F1RQ23	7:29205458-29212886	-	-
XLOC_026217	7:29358810-29366982	ENSSSCG00000001464	9.72489	1.71542	-2.50312	0.00455	0.138485	-	-	7:29358811-29366982	SLA-DRB5	-
XLOC_026226	7:31702756-31747437	ENSSSCG00000001488	50.246	12.4204	-2.0163	0.01345	0.267679	100522018	F1RZV7	7:31702762-31747437	GCLC	glutamate-cysteine ligase, catalytic subunit [Source:HGNC Symbol;Acc:HGNC:4311]
XLOC_026258	7:36987611-37015827	ENSSSCG00000001561	0.846881	0.109577	-2.95021	0.04925	0.48599	100156210	F1RY95	7:36990013-37008146	ETV7	ets variant 7 [Source:HGNC Symbol;Acc:HGNC:18160]
XLOC_026262	7:37257913-37267487	ENSSSCG00000022111	62.9604	20.0046	-1.65411	0.01445	0.277709	100152215	I3LK35	7:37258053-37267163	-	-
XLOC_026267	7:37691962-37697467	ENSSSCG00000001573	17.1783	5.19903	-1.72428	0.0023	0.0881667	100157844	F1RVS6	7:37691963-37697467	PIM1	Pim-1 proto-oncogene, serine/threonine kinase [Source:HGNC Symbol;Acc:HGNC:8986]
XLOC_026284	7:41775779-41825829	ENSSSCG00000001616|ENSSSCG00000001617	11.7453	1.73846	-2.7562	0.00815	0.205928	100738047|100620427,396601	F1RUY7,I3LTE9|Q6TYI6,K7GS40	7:41779258-41786674|7:41803220-41825829	TREML-2|TREM1	-|Triggering receptor expressed on myeloid cells 1 [Source:UniProtKB/Swiss-Prot;Acc:Q6TYI6]
XLOC_026308	7:43711416-43724169	ENSSSCG00000001661	16.9423	7.80303	-1.11852	0.02415	0.368045	100155958	F1RRM9	7:43714054-43724057	SRF	serum response factor [Source:HGNC Symbol;Acc:HGNC:11291]
XLOC_026325	7:45091010-45104550	ENSSSCG00000001700	5.60146	2.33793	-1.26057	0.0419	0.457293	396631	F1RQU4	7:45091212-45104205	SLC29A1	solute carrier family 29 (equilibrative nucleoside transporter), member 1 [Source:HGNC Symbol;Acc:HGNC:11003]
XLOC_026346	7:48875040-48952259	ENSSSCG00000001728	9.89192	1.16054	-3.09145	0.0432	0.461154	-	F1RQ14	7:48909166-48952259	-	-
XLOC_026368	7:53970180-53972740	ENSSSCG00000001773	192.38	33.7751	-2.50992	5e-05	0.00483523	-	F1RKR4,I3LEQ4	7:53970181-53972740	-	-
XLOC_026375	7:55350327-55375597	ENSSSCG00000001783	12.79	1.01587	-3.65422	0.00195	0.0793236	-	F1RIF0	7:55364297-55375597	CEMIP	cell migration inducing protein, hyaluronan binding [Source:HGNC Symbol;Acc:HGNC:29213]
XLOC_026378	7:55406688-55419609	-	14.6165	4.35499	-1.74686	0.04985	0.489159	-	-	-	-	-
XLOC_026401	7:58486879-58503979	ENSSSCG00000001817	42.4633	9.89769	-2.10105	0.0246	0.369869	100156882	F1RMJ1	7:58495234-58502440	FURIN	furin (paired basic amino acid cleaving enzyme) [Source:HGNC Symbol;Acc:HGNC:8568]
XLOC_026402	7:58504715-58516272	ENSSSCG00000001818	14.4818	5.49267	-1.39866	0.02145	0.34889	100155631	F1RMJ0	7:58504885-58516272	FES	FES proto-oncogene, tyrosine kinase [Source:HGNC Symbol;Acc:HGNC:3657]
XLOC_026403	7:58529931-58552621	ENSSSCG00000001819	20.3939	8.33041	-1.29168	0.01745	0.308346	100154397	F1RMI9	7:58530082-58551903	MAN2A2	mannosidase, alpha, class 2A, member 2 [Source:HGNC Symbol;Acc:HGNC:6825]
XLOC_026415	7:59631040-59751532	ENSSSCG00000001835	31.1036	4.94025	-2.65442	0.00025	0.0168849	100153434	F1SKQ2	7:59631041-59745342	ABHD2	abhydrolase domain containing 2 [Source:HGNC Symbol;Acc:HGNC:18717]
XLOC_026481	7:69799754-69899579	ENSSSCG00000001958	8.46377	3.95136	-1.09895	0.0316	0.409184	100151954	F1SHI5	7:69799806-69899457	BAZ1A	bromodomain adjacent to zinc finger domain, 1A [Source:HGNC Symbol;Acc:HGNC:960]
XLOC_026489	7:70667588-70695760	ENSSSCG00000001963	33.0294	5.51868	-2.58135	5e-05	0.00483523	100152368	F1SHH1	7:70667589-70695692	EGLN3	egl-9 family hypoxia-inducible factor 3 [Source:HGNC Symbol;Acc:HGNC:14661]
XLOC_026618	7:86733535-86815009	-	2.08329	0.154711	-3.75122	0.01815	0.315217	-	-	-	-	-
XLOC_026634	7:94900250-94906867	ENSSSCG00000002268	2.31582	0.728015	-1.66948	0.0444	0.466244	100153460	F1SA75	7:94903221-94904504	AKAP5	A kinase (PRKA) anchor protein 5 [Source:HGNC Symbol;Acc:HGNC:375]
XLOC_026655	7:98877966-98895385	ENSSSCG00000025196	37.3129	14.227	-1.39104	0.0312	0.408183	-	I3LIK6	7:98882434-98895385	-	-
XLOC_026671	7:101794922-101849982	-	1.11478	0.286271	-1.96131	0.0405	0.453814	-	-	-	-	-
XLOC_026705	7:105958713-105978240	ENSSSCG00000002389	6.55128	3.08377	-1.08708	0.0292	0.397969	100511141	F1S2P8	7:105960537-105978240	VASH1	vasohibin 1 [Source:HGNC Symbol;Acc:HGNC:19964]
XLOC_026719	7:106678209-106734498	ENSSSCG00000002404	3.0629	1.3655	-1.16547	0.04815	0.48366	-	F1SE08	7:106678419-106734252	SPTLC2	serine palmitoyltransferase, long chain base subunit 2 [Source:HGNC Symbol;Acc:HGNC:11278]
XLOC_026737	7:116433282-116500037	ENSSSCG00000028027	18.8522	1.99802	-3.23808	0.0044	0.13547	100155711,100738055	I3LKL4	7:116433283-116443636	GPR65	-
XLOC_026814	7:131340854-131347987	ENSSSCG00000002554	6.97574	2.29428	-1.60431	0.0165	0.300289	100524095	F1S9V1	7:131340863-131347987	PLD4	phospholipase D family, member 4 [Source:HGNC Symbol;Acc:HGNC:23792]
XLOC_026875	7:3952948-4102412	ENSSSCG00000024310	11.2943	2.60028	-2.11885	0.00125	0.0571909	100153504	K7GQL2,F1RWW8	7:3952949-4100229	F13A1	coagulation factor XIII, A1 polypeptide [Source:HGNC Symbol;Acc:HGNC:3531]
XLOC_026889	7:8268048-8314905	ENSSSCG00000001046	5.58881	1.18199	-2.24132	0.00105	0.0498633	100154178	F1RV86	7:8268049-8314905	-	-
XLOC_026909	7:14562433-14587800	ENSSSCG00000001073	10.4901	3.62395	-1.53339	0.02505	0.372424	100157630	F1RUH7	7:14562434-14587800	TPMT	-
XLOC_026912	7:16427504-16539233	ENSSSCG00000001078	6.42754	2.819	-1.18908	0.03955	0.44972	100152017	F1RUH2	7:16429444-16539182	MBOAT1	membrane bound O-acyltransferase domain containing 1 [Source:HGNC Symbol;Acc:HGNC:21579]
XLOC_027042	7:26987406-27028569	ENSSSCG00000027607	60.4594	25.8088	-1.2281	0.03055	0.405459	100154770	K7GMQ2,I3LN52	7:26987521-26988891	IER3	immediate early response 3 [Source:HGNC Symbol;Acc:HGNC:5392]
XLOC_027053	7:27520796-27523556	ENSSSCG00000001408	140.139	43.6899	-1.68148	0.0197	0.331056	397271	A5D9N3	7:27520797-27523556	AIF1	allograft inflammatory factor 1 [Source:HGNC Symbol;Acc:HGNC:352]
XLOC_027084	7:29093856-29125494	ENSSSCG00000001455	157.628	54.8454	-1.52308	0.02295	0.360873	100153386	Q31072,F1RQ24	7:29113232-29125494	SLA-DRB1	-
XLOC_027085	7:29177954-29189021	ENSSSCG00000001457	163.174	34.956	-2.2228	0.0365	0.431154	100037921	Q8MGP9	7:29180891-29188688	SLA-DQB1	-
XLOC_027091	7:29344450-29356494	ENSSSCG00000030783|ENSSSCG00000030923|ENSSSCG00000030988	11.0713	2.6835	-2.04463	0.04905	0.485141	-|-|-	-|-|-	7:29355214-29355582|7:29352892-29356446|7:29352313-29353267	SBAB-554F3.9|SBAB-554F3.8|SLA-DOB2	-|-|-
XLOC_027098	7:29485881-29494737	ENSSSCG00000001469	47.8976	11.214	-2.09465	0.00285	0.101905	100135050	A5D9L3	7:29485890-29491702	SLA-DMB	-
XLOC_027099	7:29500106-29504539	ENSSSCG00000001470	34.0611	7.50318	-2.18255	0.00015	0.0115208	445528	K7GRZ3,Q9BEA4,A5D9K9,A5D9L0	7:29500107-29504539	HLA-DMA	major histocompatibility complex, class II, DM alpha [Source:HGNC Symbol;Acc:HGNC:4934]
XLOC_027182	7:41631084-41645627	ENSSSCG00000027922	2.92054	0.843393	-1.79196	0.0324	0.41241	100737363	I3LUA4	7:41631101-41640482	-	-
XLOC_027186	7:41763415-41767174	ENSSSCG00000001614	6.9613	0.808388	-3.10624	0.02775	0.391208	-	F1RVL6	7:41763416-41767174	TREM2	triggering receptor expressed on myeloid cells 2 precursor [Source:RefSeq peptide;Acc:NP_001243706]
XLOC_027187	7:41775779-41825829	ENSSSCG00000001616	1.42417	0.0239658	-5.893	0.0053	0.153203	100738047	F1RUY7,I3LTE9	7:41779258-41786674	TREML-2	-
XLOC_027226	7:45124043-45132826	ENSSSCG00000001703	7.73859	3.26321	-1.24578	0.041	0.455496	100153486	F1RQU0,K7GLV4	7:45124044-45132794	NFKBIE	nuclear factor of kappa light polypeptide gene enhancer in B-cells inhibitor, epsilon [Source:HGNC Symbol;Acc:HGNC:7799]
XLOC_027245	7:48679132-48748761	ENSSSCG00000001727	4.61867	1.06059	-2.1226	0.0029	0.102829	-	-	7:48679133-48748761	TNFRSF21	-
XLOC_027279	7:53620382-53644589	ENSSSCG00000001770	248.103	90.9142	-1.44836	0.0341	0.419594	396969	O46427,F1RKR7	7:53623062-53644262	CTSH	Pro-cathepsin H Cathepsin H mini chain Cathepsin H Cathepsin H heavy chain Cathepsin H light chain [Source:UniProtKB/Swiss-Prot;Acc:O46427]
XLOC_027282	7:53974709-53981929	ENSSSCG00000001774	145.875	48.2701	-1.59553	0.0081	0.205152	-	F1RKQ3	7:53975752-53975976	-	-
XLOC_027285	7:54395230-54420042	ENSSSCG00000001778	124.002	11.7315	-3.4019	0.0023	0.0881667	100156860	C7F841	7:54395231-54406136	BCL2A1	BCL2-related protein A1 [Source:HGNC Symbol;Acc:HGNC:991]
XLOC_027289	7:55237530-55289283	ENSSSCG00000027023	9.26151	0.512191	-4.17649	5e-05	0.00483523	-	I3LF58	7:55237531-55245228	-	-
XLOC_027307	7:58452073-58455206	-	1.52217	0	-inf	5e-05	0.00483523	-	-	-	-	-
XLOC_027354	7:63621164-63657825	ENSSSCG00000022812	1.57661	0.513792	-1.61757	0.04255	0.458346	-	I3L967	7:63621165-63652662	ARID3B	AT rich interactive domain 3B (BRIGHT-like) [Source:HGNC Symbol;Acc:HGNC:14350]
XLOC_027388	7:72211399-72252091	ENSSSCG00000001966	3.67486	1.46623	-1.32558	0.0414	0.457293	100736576	I3LD06	7:72211400-72237346	-	-
XLOC_027426	7:80512358-80525770	ENSSSCG00000002013	513.112	90.8031	-2.49846	0.0154	0.289942	397082	Q8WNV7	7:80512359-80525770	DHRS4	Dehydrogenase/reductase SDR family member 4 [Source:UniProtKB/Swiss-Prot;Acc:Q8WNV7]
XLOC_027490	7:83454639-83462606	ENSSSCG00000002135	80.2337	21.9549	-1.86967	0.0093	0.220086	100157138	F1S8H8	7:83454640-83459911	PNP	purine nucleoside phosphorylase [Source:HGNC Symbol;Acc:HGNC:7892]
XLOC_027533	7:87585844-87598954	ENSSSCG00000002252	53.2975	10.2009	-2.38537	0.00915	0.218726	100155895	F1SCJ8,K7GP13	7:87586099-87598954	ARRDC4	arrestin domain containing 4 [Source:HGNC Symbol;Acc:HGNC:28087]
XLOC_027599	7:103586115-103694742	ENSSSCG00000002368	7.69131	2.20732	-1.80093	0.0096	0.223947	-	F1S2T5	7:103590368-103694062	LTBP2	latent transforming growth factor beta binding protein 2 [Source:HGNC Symbol;Acc:HGNC:6715]
XLOC_027633	7:110395012-110446115	ENSSSCG00000002414	9.24124	1.6113	-2.51986	0.002	0.0808935	-	F1SDZ8	7:110402805-110446103	SEL1L	sel-1 suppressor of lin-12-like (C. elegans) [Source:HGNC Symbol;Acc:HGNC:10717]
XLOC_027636	7:116433282-116500037	ENSSSCG00000021146	18.5677	2.05273	-3.17718	0.0246	0.369869	100155711,100738055	I3LKL4	7:116489887-116490912	-	-
XLOC_027649	7:119457228-119485300	ENSSSCG00000002439	6.91928	0.353714	-4.28997	0.00175	0.0737252	100153615	F1SD92	7:119459362-119460480	GPR68	G protein-coupled receptor 68 [Source:HGNC Symbol;Acc:HGNC:4519]
XLOC_027663	7:120780128-120811703	ENSSSCG00000002452	102.448	23.942	-2.09728	0.00495	0.146878	-	F1SD70	7:120780129-120811703	-	-
XLOC_027788	7:3037-6371	-	0.911809	0.122115	-2.90049	0.02395	0.366573	-	-	-	-	-
XLOC_027808	7:5656466-5657365	-	0.79633	0	-inf	0.00035	0.0217727	-	-	-	-	-
XLOC_027830	7:16340421-16343087	-	7.288	3.09632	-1.23497	0.0292	0.397969	-	-	-	-	-
XLOC_027893	7:31668562-31668844	-	159.838	41.5192	-1.94476	0.03785	0.439552	-	-	-	-	-
XLOC_027933	7:40713551-40765330	-	14.0535	1.10213	-3.67256	0.03245	0.41241	-	-	-	-	-
XLOC_027956	7:47154641-47155208	-	9.32123	2.3277	-2.00162	0.0498	0.489159	-	-	-	-	-
XLOC_027964	7:55131779-55132278	-	2.15224	0	-inf	0.00015	0.0115208	-	-	-	-	-
XLOC_028209	8:19172809-19303275	ENSSSCG00000028814	104.987	15.2699	-2.78145	0.0028	0.100966	780439	I3LUD1	8:19289181-19294039	SOD3	extracellular superoxide dismutase precursor [Source:RefSeq peptide;Acc:NP_001072156]
XLOC_028223	8:24320454-24735860	ENSSSCG00000008765	4.54298	1.4614	-1.63628	0.02245	0.357503	100520035	F1S4M3	8:24323042-24333142	PCDH7	protocadherin 7 [Source:HGNC Symbol;Acc:HGNC:8659]
XLOC_028230	8:30717838-30754353	ENSSSCG00000008773	17.3965	4.32865	-2.00681	0.00195	0.0793236	100522261	F1S4K7	8:30718143-30753812	-	-
XLOC_028248	8:32988376-33039894	ENSSSCG00000008794	6.58301	0.306503	-4.42477	0.0045	0.13716	100513215	I3LRS0	8:32988377-33036670	RHOH	ras homolog gene family, member H [Source:RefSeq peptide;Acc:NP_001231718]
XLOC_028344	8:64731667-64742813	-	81.6513	0	-inf	5e-05	0.00483523	-	-	-	-	-
XLOC_028361	8:71288921-71302169	ENSSSCG00000008937	3.52427	0.93273	-1.91779	0.0284	0.395345	397102	-	8:71288922-71302169	AMBN	Ameloblastin [Source:UniProtKB/Swiss-Prot;Acc:Q28989]
XLOC_028370	8:72528682-72562052	ENSSSCG00000008944	1.98131	0.253673	-2.96542	0.03785	0.439552	-	F1RUN6	8:72528696-72559247	NPFFR2	neuropeptide FF receptor 2 [Source:HGNC Symbol;Acc:HGNC:4525]
XLOC_028379	8:74083529-74086750	ENSSSCG00000008953	400.726	4.49632	-6.47773	5e-05	0.00483523	100620730,396880	P26894	8:74083530-74086750	CXCL8	Interleukin-8 [Source:UniProtKB/Swiss-Prot;Acc:P26894]
XLOC_028380	8:74159969-74162170	ENSSSCG00000008957	64.8525	1.66408	-5.28437	5e-05	0.00483523	396900	P22952	8:74159970-74162170	AMCF-II	Alveolar macrophage chemotactic factor 2 [Source:UniProtKB/Swiss-Prot;Acc:P22952]
XLOC_028384	8:74162272-74312037	ENSSSCG00000008959	64.7962	4.779	-3.76113	0.0022	0.0866759	414904	Q6PUJ1,K7GPC7	8:74206843-74311988	CXCL2	C-X-C motif chemokine 2 precursor [Source:RefSeq peptide;Acc:NP_001001861]
XLOC_028388	8:74502155-74523418	ENSSSCG00000008962	2.05187	0.126376	-4.02115	0.00265	0.0975411	100620969	F1RYW8	8:74515115-74519617	EREG	epiregulin [Source:HGNC Symbol;Acc:HGNC:3443]
XLOC_028401	8:76177859-76182546	ENSSSCG00000008982	13.5069	6.08837	-1.14957	0.0287	0.395974	100522745	F1RYS9	8:76177908-76182538	STBD1	starch binding domain 1 [Source:HGNC Symbol;Acc:HGNC:24854]
XLOC_028419	8:79743274-79751980	ENSSSCG00000009004	10.6236	2.01092	-2.40135	0.0017	0.0721906	100516027	F1RX31	8:79743275-79751980	SFRP2	-
XLOC_028425	8:80925606-80968913	ENSSSCG00000009012	11.6322	3.23448	-1.84652	0.03615	0.430141	-	F1RSA6	8:80945044-80965689	TMEM154	transmembrane protein 154 [Source:HGNC Symbol;Acc:HGNC:26489]
XLOC_028447	8:88518870-88560649	ENSSSCG00000009042	1.90499	0.668857	-1.51002	0.0402	0.452995	-	F1RS50	8:88518946-88558192	OTUD4	OTU deubiquitinase 4 [Source:HGNC Symbol;Acc:HGNC:24949]
XLOC_028509	8:112598495-112703273	ENSSSCG00000009112	6.75014	2.7776	-1.28108	0.0336	0.41706	-	F1S155	8:112598496-112703271	-	-
XLOC_028566	8:129550396-129555108	ENSSSCG00000025240	8.52145	2.09734	-2.02254	0.00185	0.0762766	100525762	I3LT71	8:129550397-129555105	DDIT4L	DNA-damage-inducible transcript 4-like [Source:HGNC Symbol;Acc:HGNC:30555]
XLOC_028752	8:31769509-31822924	ENSSSCG00000008786|ENSSSCG00000023785	5.05067	1.32126	-1.93455	0.0229	0.36062	-|-	F1S4I9|I3LSZ0	8:31769682-31790270|8:31792550-31822924	-|-	-|-
XLOC_028759	8:32679905-32803323	ENSSSCG00000023112	4.68746	2.1249	-1.14141	0.04045	0.453814	100512479	I3LU95	8:32680012-32803323	PDS5A	PDS5 cohesin associated factor A [Source:HGNC Symbol;Acc:HGNC:29088]
XLOC_028776	8:38812489-38844715	-	9.26006	1.8479	-2.32514	0.02185	0.3527	-	-	-	-	-
XLOC_028802	8:43919342-43966992	ENSSSCG00000008844	6.26467	1.96926	-1.66958	0.0045	0.13716	397311	F1RWF1,K7GNF0,K7GNY2,K7GRU8	8:43919343-43966974	KDR	kinase insert domain receptor [Source:HGNC Symbol;Acc:HGNC:6307]
XLOC_028838	8:55502549-56017353	ENSSSCG00000008891	3.38451	0.666299	-2.3447	0.00775	0.199856	-	F1RTW3	8:55506936-55661305	MARCH1	membrane-associated ring finger (C3HC4) 1, E3 ubiquitin protein ligase [Source:HGNC Symbol;Acc:HGNC:26077]
XLOC_028897	8:72647881-72882590	ENSSSCG00000008946|ENSSSCG00000021327|ENSSSCG00000023499|ENSSSCG00000027622	8.79176	2.5842	-1.76643	0.0302	0.402572	-|-|-|-	F1RUN4|I3LMF5|I3L7B3|I3LJV0	8:72658900-72666720|8:72669288-72694764|8:72780846-72882059|8:72647990-72655891	ADAMTS3|-|-|-	ADAM metallopeptidase with thrombospondin type 1 motif, 3 [Source:HGNC Symbol;Acc:HGNC:219]|-|-|-
XLOC_028907	8:75282167-75291245	-	11.0511	0.282107	-5.2918	0.0216	0.349992	-	-	-	-	-
XLOC_028913	8:75709378-75738808	ENSSSCG00000008973	6.15184	1.895	-1.69882	0.0103	0.231641	100521735	F1RYU7	8:75709379-75738808	NAAA	N-acylethanolamine acid amidase [Source:HGNC Symbol;Acc:HGNC:736]
XLOC_028941	8:79814562-79834696	ENSSSCG00000009002	11.4093	1.10174	-3.37236	0.0004	0.0238375	396623	Q59HI8	8:79824541-79834592	TLR2	toll-like receptor 2 [Source:HGNC Symbol;Acc:HGNC:11848]
XLOC_028983	8:91914555-91943172	-	3.85389	1.32893	-1.53605	0.02815	0.39349	-	-	-	-	-
XLOC_028993	8:93479067-93503333	ENSSSCG00000024596	9.21815	1.38144	-2.7383	0.00015	0.0115208	100513746	I3LN01	8:93479433-93503333	NOCT	nocturnin [Source:HGNC Symbol;Acc:HGNC:14254]
XLOC_029057	8:122299942-122406942	ENSSSCG00000009152	9.29912	0.941845	-3.30353	0.01465	0.280539	100518796	F1S122	8:122315432-122406939	SGMS2	sphingomyelin synthase 2 [Source:HGNC Symbol;Acc:HGNC:28395]
XLOC_029081	8:129822229-129850879	ENSSSCG00000028367	5.80681	2.02577	-1.51927	0.0206	0.339477	-	I3LKE0	8:129822230-129850879	-	-
XLOC_029089	8:133442754-134240919	ENSSSCG00000029621	30.1414	6.03701	-2.31984	0.00025	0.0168849	-	K7GKH5,K7GQX2,I3LIC3,K7GT10	8:133740991-134040905	BMPR1B	bone morphogenetic protein receptor, type IB [Source:HGNC Symbol;Acc:HGNC:1077]
XLOC_029091	8:134331168-134558807	ENSSSCG00000009192	95.7502	25.3233	-1.91881	0.04185	0.457293	-	F1RWW4	8:134331169-134558588	PDLIM5	PDZ and LIM domain 5 [Source:HGNC Symbol;Acc:HGNC:17468]
XLOC_029107	8:140233073-140315437	ENSSSCG00000009216	691.956	25.162	-4.78136	0.00165	0.0709167	397087	P14287	8:140307938-140315415	SPP1	secreted phosphoprotein 1 [Source:HGNC Symbol;Acc:HGNC:11255]
XLOC_029109	8:140438439-140452173	ENSSSCG00000009219	124.45	25.9403	-2.2623	0.00405	0.127839	397137	P31936,K7GP14	8:140438440-140452173	IBSP	integrin-binding sialoprotein [Source:HGNC Symbol;Acc:HGNC:5341]
XLOC_029121	8:143437283-143519675	ENSSSCG00000009231	0.776139	0.131391	-2.56245	0.03455	0.421958	733582	F1RW13	8:143439802-143519675	CDS1	-
XLOC_029167	8:12934335-12934585	-	73.1262	0	-inf	5e-05	0.00483523	-	-	-	-	-
XLOC_029173	8:17146005-17146515	-	3.81611	0	-inf	5e-05	0.00483523	-	-	-	-	-
XLOC_029178	8:18942705-18949796	-	175.77	11.2721	-3.96285	0.0089	0.21615	-	-	-	-	-
XLOC_029216	8:33750672-33751265	-	5.0952	0.480482	-3.40658	0.0311	0.407924	-	-	-	-	-
XLOC_029312	8:74058517-74059591	-	1.9365	0.0361405	-5.74369	0.04785	0.482334	-	-	-	-	-
XLOC_029370	8:96843255-96844448	-	11.9699	4.42554	-1.43549	0.02	0.333203	-	-	-	-	-
XLOC_029395	8:109538555-109539284	-	1.15857	0.063151	-4.1974	0.0453	0.470815	-	-	-	-	-
XLOC_029398	8:110076059-110076842	-	9.1744	1.9053	-2.26759	0.0333	0.41674	-	-	-	-	-
XLOC_029487	9:532153-554467	ENSSSCG00000014570	12.1096	2.17613	-2.47631	5e-05	0.00483523	100519788	F1RNK2	9:532154-554467	NRIP3	nuclear receptor interacting protein 3 [Source:HGNC Symbol;Acc:HGNC:1167]
XLOC_029625	9:10406855-10429007	ENSSSCG00000021638	1.26481	0.278155	-2.18496	0.02785	0.391208	100739223	I3LRE9	9:10406856-10425772	NEU3	sialidase 3 (membrane sialidase) [Source:HGNC Symbol;Acc:HGNC:7760]
XLOC_029680	9:24189216-24197722	-	10.4064	0.666848	-3.96397	0.00025	0.0168849	-	-	-	-	-
XLOC_029713	9:30047880-30186891	ENSSSCG00000014951	1.28288	0.449907	-1.51169	0.04355	0.462338	-	F1STK5	9:30177624-30183092	PANX1	pannexin 1 [Source:HGNC Symbol;Acc:HGNC:8599]
XLOC_029737	9:36952008-36969106	ENSSSCG00000023589	20.4418	7.80837	-1.38843	0.0425	0.458346	-	O62640	9:36957941-36969067	BIRC3	baculoviral IAP repeat containing 3 [Source:HGNC Symbol;Acc:HGNC:591]
XLOC_029784	9:45463350-45795259	ENSSSCG00000015045	11.4634	1.12074	-3.35451	5e-05	0.00483523	100515564	K7GR86,F1SM72,K7GMV4,K7GPB6	9:45725936-45795212	NCAM1	neural cell adhesion molecule 1 [Source:HGNC Symbol;Acc:HGNC:7656]
XLOC_029812	9:50364899-50379299	ENSSSCG00000015085	27.6001	1.91381	-3.85015	5e-05	0.00483523	100525654	F1SAM5,K7GNL8,K7GSL4	9:50364900-50379299	IL10RA	-
XLOC_029829	9:51356374-51366267	ENSSSCG00000015111	4.23796	1.5952	-1.40963	0.02865	0.395974	100518141	F1SAH4	9:51356375-51366267	C2CD2L	C2CD2-like [Source:HGNC Symbol;Acc:HGNC:29000]
XLOC_029848	9:54427783-54443507	-	4.36705	0.0681834	-6.00109	5e-05	0.00483523	-	-	-	-	-
XLOC_029850	9:54975988-55118138	ENSSSCG00000015136	6.4451	0.64032	-3.33134	5e-05	0.00483523	100521108	F1S9R5	9:54975989-55118138	UBASH3B	ubiquitin associated and SH3 domain containing B [Source:HGNC Symbol;Acc:HGNC:29884]
XLOC_029894	9:57752749-57818276	ENSSSCG00000022536	6.31415	1.13323	-2.47814	0.00365	0.120393	100523389	F1S792	9:57752750-57790694	SLC37A2	solute carrier family 37 (glucose-6-phosphate transporter), member 2 [Source:HGNC Symbol;Acc:HGNC:20644]
XLOC_029924	9:62964910-63035190	ENSSSCG00000015244	100.83	18.0208	-2.48419	0.0064	0.173895	100126835	F1S6E8	9:62965068-63035190	APLP2	amyloid beta (A4) precursor-like protein 2 [Source:HGNC Symbol;Acc:HGNC:598]
XLOC_029947	9:70137739-70171698	ENSSSCG00000015268	47.2862	12.5816	-1.91011	0.01145	0.246807	397132	P16549	9:70137792-70171698	FMO1	flavin containing monooxygenase 1 [Source:HGNC Symbol;Acc:HGNC:3769]
XLOC_029949	9:70288033-70332169	ENSSSCG00000028322	64.5261	26.658	-1.27532	0.0127	0.261308	100048932	B0F7G7	9:70327445-70331400	BTG2	-
XLOC_029968	9:72916106-72946419	ENSSSCG00000022307	3.5178	0.733131	-2.26253	0.0049	0.146005	100627693	I3LRC7	9:72916107-72946419	RAB7B	RAB7B, member RAS oncogene family [Source:HGNC Symbol;Acc:HGNC:30513]
XLOC_029971	9:73428646-73458954	-	3.61979	0.352174	-3.36155	0.02855	0.395959	-	-	-	-	-
XLOC_029973	9:73476036-73508473	ENSSSCG00000023879	2.12241	0.517013	-2.03743	0.0132	0.266188	-	I3LHM9	9:73476068-73497919	-	-
XLOC_029974	9:73508689-73590643	ENSSSCG00000015647	2.71938	0.426404	-2.67299	0.00135	0.0607215	-	F1SEZ7	9:73508690-73590643	RASSF5	Ras association (RalGDS/AF-6) domain family member 5 [Source:HGNC Symbol;Acc:HGNC:17609]
XLOC_029976	9:73667345-73718361	ENSSSCG00000015650	32.2322	12.3065	-1.38908	0.01035	0.232275	100521986	F1SEZ4	9:73667346-73718361	MAPKAPK2	mitogen-activated protein kinase-activated protein kinase 2 [Source:HGNC Symbol;Acc:HGNC:6887]
XLOC_029991	9:74313784-74393788	ENSSSCG00000015664	55.6588	8.40721	-2.72691	0.0027	0.0983604	-	F1S0J0,K7GS67	9:74313785-74390047	CD55	CD55 molecule, decay accelerating factor for complement (Cromer blood group) [Source:HGNC Symbol;Acc:HGNC:2665]
XLOC_030012	9:79907166-79910241	ENSSSCG00000024702	2.64331	0	-inf	0.03405	0.419594	-	I3LJP5	9:79907167-79910241	-	-
XLOC_030065	9:98588685-98771990	ENSSSCG00000015375	1.26303	0.28669	-2.13933	0.04635	0.475915	-	-	9:98589971-98766514	ITGB8	-
XLOC_030093	9:106623899-106636179	ENSSSCG00000022472|ENSSSCG00000028086	5.48721	0.631728	-3.1187	0.0037	0.12129	-|-	I3L6P7|I3LA33	9:106632158-106636175|9:106626163-106628684	-|-	-|-
XLOC_030129	9:117537645-117576054	ENSSSCG00000027272	0.916463	0.289119	-1.66442	0.0317	0.409184	-	I3LJB7	9:117537646-117576054	-	-
XLOC_030142	9:119465472-119469537	ENSSSCG00000020963	4.80387	1.71398	-1.48684	0.0229	0.36062	-	I3LRH5	9:119465473-119469537	EPDR1	ependymin related 1 [Source:HGNC Symbol;Acc:HGNC:17572]
XLOC_030160	9:125188691-125238341	ENSSSCG00000015474	1.5248	0.25271	-2.59307	0.0038	0.123239	100512361	F1S7U4	9:125188692-125235698	-	-
XLOC_030169	9:127044586-127049272	ENSSSCG00000015488	1.21671	0.270117	-2.17133	0.04575	0.472491	-	F6Q128	9:127044587-127046516	TNFSF4	tumor necrosis factor (ligand) superfamily, member 4 [Source:HGNC Symbol;Acc:HGNC:11934]
XLOC_030171	9:127140104-127151862	ENSSSCG00000015487	3.88122	0.213465	-4.18444	0.00015	0.0115208	100516458	K7GNX5,F1S746	9:127140871-127151423	TNFSF18	tumor necrosis factor (ligand) superfamily, member 18 [Source:HGNC Symbol;Acc:HGNC:11932]
XLOC_030190	9:131482933-132024023	ENSSSCG00000015519	2.70158	0.711416	-1.92504	0.00555	0.157856	106504097	F1S6Y8,I3L678	9:131679500-132012064	RASAL2	RAS protein activator like 2 [Source:HGNC Symbol;Acc:HGNC:9874]
XLOC_030214	9:136360243-136365297	ENSSSCG00000024375	12.4666	3.42079	-1.86567	0.0404	0.453814	100513875	I3L5S8	9:136360731-136364508	-	-
XLOC_030228	9:139082799-139097293	-	2.14387	0.277363	-2.95037	0.04915	0.485722	-	-	-	-	-
XLOC_030246	9:143687546-143703886	ENSSSCG00000015595	27.486	6.50874	-2.07825	0.0002	0.0143266	100738612	K7GM91,K7GL00,F1S2W1	9:143690556-143703872	ATF3	activating transcription factor 3 [Source:HGNC Symbol;Acc:HGNC:785]
XLOC_030250	9:144388385-144389573	ENSSSCG00000021090	0.730527	0	-inf	0.0264	0.381822	-	I3L7F3	9:144388386-144389573	-	-
XLOC_030251	9:144465288-144545562	ENSSSCG00000015603	6.17589	2.49171	-1.30951	0.0397	0.450703	-	F1S2U6	9:144465289-144538584	LPGAT1	lysophosphatidylglycerol acyltransferase 1 [Source:HGNC Symbol;Acc:HGNC:28985]
XLOC_030256	9:144984722-144985864	ENSSSCG00000021747	2.08775	0	-inf	0.04415	0.464996	-	I3LNV6	9:144984723-144985864	-	-
XLOC_030264	9:146493480-146494458	ENSSSCG00000015617	186.626	83.6824	-1.15715	0.0375	0.437397	100624161	F1SF46	9:146493481-146494458	G0S2	G0/G1 switch 2 [Source:HGNC Symbol;Acc:HGNC:30229]
XLOC_030269	9:147877834-148015289	ENSSSCG00000015621	6.19301	0.851332	-2.86285	0.0088	0.214702	100514595,100736916	F1SF33	9:147877835-148015289	-	-
XLOC_030270	9:148100852-148333315	ENSSSCG00000026412	7.12651	1.14162	-2.64211	0.0013	0.0590972	-	I3L9A8	9:148127165-148333069	-	-
XLOC_030450	9:8451978-8462517	-	0.738193	0	-inf	0.00015	0.0115208	-	-	-	-	-
XLOC_030467	9:10267863-10372349	ENSSSCG00000021702	1.44121	0.440945	-1.70861	0.0463	0.475631	100518139	I3L9Q5	9:10269414-10372349	-	-
XLOC_030529	9:25234461-25427981	ENSSSCG00000014927	1.81779	0.637474	-1.51174	0.04345	0.461968	100523323	K7GRK1,K7GQX3,F1STQ7,K7GM55	9:25236706-25427981	NOX4	NADPH oxidase 4 [Source:HGNC Symbol;Acc:HGNC:7891]
XLOC_030566	9:37358376-37367260	ENSSSCG00000014985	17.5593	2.2623	-2.95638	0.0002	0.0143266	397320	P21692	9:37358377-37367260	MMP1	Interstitial collagenase 18 kDa interstitial collagenase [Source:UniProtKB/Swiss-Prot;Acc:P21692]
XLOC_030578	9:39209730-39222235	ENSSSCG00000028711	16.41	4.14279	-1.9859	0.00265	0.0975411	397319	I3LIL3	9:39209731-39222235	CASP1	caspase-1 [Source:RefSeq peptide;Acc:NP_999327]
XLOC_030636	9:49273814-49276432	ENSSSCG00000015068	1.03418	0.0231812	-5.47938	0.04195	0.457293	397681	F1SJT7	9:49273815-49276432	APOA4	-
XLOC_030646	9:50261908-50297812	ENSSSCG00000015083	72.9215	30.7941	-1.24369	0.0347	0.422094	102158732	F1SB94	9:50266077-50268705	-	-
XLOC_030738	9:59333126-59461175	ENSSSCG00000015234	0.774859	0.178621	-2.11703	0.0294	0.398398	100515566	F1S6H0	9:59333127-59461175	KIRREL3	kin of IRRE like 3 (Drosophila) [Source:HGNC Symbol;Acc:HGNC:23204]
XLOC_030750	9:63780730-63829935	ENSSSCG00000015252	3.72625	1.35753	-1.45675	0.04095	0.455496	100519207	F1S6D1	9:63790485-63829935	SNX19	sorting nexin 19 [Source:HGNC Symbol;Acc:HGNC:21532]
XLOC_030774	9:71198498-71362967	ENSSSCG00000015281|ENSSSCG00000026643	4.5537	0.704579	-2.6922	0.001	0.0482426	-|-	F1S376|I3LEJ1	9:71201635-71282250|9:71349534-71362329	PLEKHA6|-	pleckstrin homology domain containing, family A member 6 [Source:HGNC Symbol;Acc:HGNC:17053]|-
XLOC_030795	9:73367926-73374329	ENSSSCG00000015644	2.69441	0.851409	-1.66204	0.04875	0.485098	-	F1SF01,K7GS48,K7GP85,K7GLB4,I3L6X4,K7GKL6,M9MMN5	9:73367927-73391086	IKBKE	-
XLOC_030801	9:73757703-73762351	ENSSSCG00000015652	5.08188	1.19837	-2.08429	0.0392	0.448135	397106	Q29055	9:73757704-73762351	IL10	interleukin 10 [Source:HGNC Symbol;Acc:HGNC:5962]
XLOC_030803	9:74051911-74089061	ENSSSCG00000015659	3.24897	0.723054	-2.1678	0.004	0.126637	100520400	F1RTR7	9:74057171-74059563	YOD1	YOD1 deubiquitinase [Source:HGNC Symbol;Acc:HGNC:25035]
XLOC_030827	9:79476430-79480047	ENSSSCG00000015318	3.96387	0.592226	-2.74269	0.01205	0.254582	-	K7GSW3,F1SFC5,K7GRU6,K7GT60	9:79239885-79480047	CDK6	cyclin-dependent kinase 6 [Source:HGNC Symbol;Acc:HGNC:1777]
XLOC_030828	9:79679591-79714178	ENSSSCG00000027372	4.85488	1.46521	-1.72833	0.00345	0.117063	100519098	I3LB61	9:79679836-79684587	SAMD9	sterile alpha motif domain containing 9 [Source:HGNC Symbol;Acc:HGNC:1348]
XLOC_030845	9:82625076-82638570	ENSSSCG00000015334	63.0188	14.4729	-2.12242	0.00655	0.177744	100286778	C1IHT9	9:82625077-82638263	PDK4	-
XLOC_030876	9:95355632-95391463	ENSSSCG00000015364	2.63526	0.555995	-2.2448	0.00775	0.199856	-	F1SEI6,I3L5U3	9:95356003-95391463	-	-
XLOC_030928	9:114069878-114559194	ENSSSCG00000015426	1.09511	0.281481	-1.95996	0.0309	0.407309	-	F1SB50	9:114070908-114333182	RELN	reelin [Source:HGNC Symbol;Acc:HGNC:9957]
XLOC_030976	9:125344017-125353610	ENSSSCG00000015476	14.1788	3.25027	-2.1251	0.00105	0.0498633	396865	K7GSX3,F1S7U3	9:125344018-125353610	CHI3L1	-
XLOC_031008	9:132663466-132782759	ENSSSCG00000024674	8.61954	1.24271	-2.79412	0.00395	0.125991	100627019	I3LP68	9:132671844-132782759	ABL2	ABL proto-oncogene 2, non-receptor tyrosine kinase [Source:HGNC Symbol;Acc:HGNC:77]
XLOC_031014	9:133205301-133206375	-	1.81105	0	-inf	5e-05	0.00483523	-	-	-	-	-
XLOC_031026	9:134628737-134672232	ENSSSCG00000015540|ENSSSCG00000015541	24.0868	7.43899	-1.69507	0.0229	0.36062	100511275|-	F1S677|-	9:134637147-134643117|9:134670288-134671264	MR1|-	major histocompatibility complex, class I-related [Source:HGNC Symbol;Acc:HGNC:4975]|-
XLOC_031037	9:136548463-136668882	ENSSSCG00000015555	8.53469	2.90731	-1.55365	0.0285	0.395782	100514785	F1S663	9:136548464-136668804	LAMC1	laminin, gamma 1 (formerly LAMB2) [Source:HGNC Symbol;Acc:HGNC:6492]
XLOC_031038	9:136809226-136958702	ENSSSCG00000015557	3.54189	1.01976	-1.79629	0.00465	0.140924	-	F1S661	9:136813871-136958680	NMNAT2	nicotinamide nucleotide adenylyltransferase 2 [Source:HGNC Symbol;Acc:HGNC:16789]
XLOC_031039	9:137106443-137143384	ENSSSCG00000015559	14.8039	1.8774	-2.97917	0.01	0.22901	100142665	F1S659	9:137106911-137137467	NCF2	neutrophil cytosolic factor 2 [Source:HGNC Symbol;Acc:HGNC:7661]
XLOC_031044	9:138371895-138428962	ENSSSCG00000015566	2.95808	0.485867	-2.60603	0.0128	0.262604	-	F1S3N9	9:138371896-138428962	EDEM3	ER degradation enhancer, mannosidase alpha-like 3 [Source:HGNC Symbol;Acc:HGNC:16787]
XLOC_031059	9:140251514-140260366	ENSSSCG00000015579	4.09864	0.588016	-2.80122	0.00065	0.0342296	-	-	9:140251518-140260362	PTGS2	-
XLOC_031065	9:142424389-142478040	ENSSSCG00000015584	1.8513	0.736025	-1.33071	0.0322	0.411444	100169702	F1S2Y2	9:142428903-142469651	PROX1	prospero homeobox 1 [Source:HGNC Symbol;Acc:HGNC:9459]
XLOC_031095	9:149765471-150046201	ENSSSCG00000029806	2.96994	0.492988	-2.59081	0.01585	0.295538	-	I3L604	9:149765472-149788489	-	-
XLOC_031148	9:10968315-10971281	-	1.46542	0.532561	-1.4603	0.0416	0.457293	-	-	-	-	-
XLOC_031312	9:63213915-63215737	-	24.6513	10.5614	-1.22286	0.02715	0.387922	-	-	-	-	-
XLOC_031318	9:66996335-67002681	-	1.17996	0.142169	-3.05306	0.01035	0.232275	-	-	-	-	-
XLOC_031353	9:76969178-76969421	-	131.629	28.6726	-2.19873	0.0178	0.31194	-	-	-	-	-
XLOC_031462	9:134502310-134503679	-	27.7342	12.7231	-1.12422	0.0274	0.390184	-	-	-	-	-
XLOC_031468	9:136227202-136229090	-	11.8936	2.05535	-2.53272	0.00185	0.0762766	-	-	-	-	-
XLOC_031485	9:141781431-141781950	-	1.4596	0.116323	-3.64937	0.0469	0.47925	-	-	-	-	-
XLOC_031535	GL892277.2:105991-119052	-	3.30515	0.801736	-2.04352	0.0242	0.368543	-	-	-	-	-
XLOC_031570	GL892361.2:15532-76458	ENSSSCG00000028434	3.34834	0.523381	-2.67751	0.0002	0.0143266	-	I3L833	GL892361.2:17256-67104	-	-
XLOC_031602	GL892415.2:142513-158637	-	1.64723	0.256614	-2.68237	0.023	0.361125	-	-	-	-	-
XLOC_031635	GL892482.1:25009-56335	ENSSSCG00000023165	35.7078	4.47167	-2.99735	5e-05	0.00483523	-	I3LQF4,I3LC80	GL892482.1:46903-56335	SEMA7A	semaphorin 7A, GPI membrane anchor (John Milton Hagen blood group) [Source:HGNC Symbol;Acc:HGNC:10741]
XLOC_031691	GL892613.2:11995-37451	ENSSSCG00000023359	14.7745	4.45686	-1.72901	0.0093	0.220086	-	I3L759	GL892613.2:11996-35308	-	-
XLOC_031712	GL892641.2:33148-60743	ENSSSCG00000022001	11.9	5.54365	-1.10205	0.04165	0.457293	100623864	F1SIW5	GL892641.2:58223-59416	-	-
[truncated: 168 more rows]

## Sheet: Table S3
#Term	Namespace	ID	the number of target gene candidates in differential expression genes(508)	the number of target gene candidates in all background genes(6223)	P-Value	Corrected_P-Value	Input_gene	Pathway_highlink
immune system process	Biological Process	GO:0002376	101	597	1.11448e-13	6.40826e-10	ssc:100127155,LMO4,100127155:up|ssc:396724,OLR1,396724:down|ssc:397122,IL1B1,397122:down|ssc:100522873,EPHA2,100522873:down|ssc:100621027,CX3CL1,100621027:down|ssc:494467,CXCL14,494467:down|ssc:100621675,-,100621675:down|ssc:397492,DPP4,397492:down|ssc:780421,CMKLR1,780421:down|ssc:100152038,OSM,100152038:down|ssc:445528,HLA-DMA,445528:down|ssc:100622220,SLC25A38,100622220:up|ssc:100037921,SLA-DQ…	http://amigo.geneontology.org/cgi-bin/amigo/term_details?term=GO:0002376
immune response	Biological Process	GO:0006955	65	320	1.42375e-12	4.09329e-09	ssc:397122,IL1B1,397122:down|ssc:100621027,CX3CL1,100621027:down|ssc:494467,CXCL14,494467:down|ssc:100152038,OSM,100152038:down|ssc:445528,HLA-DMA,445528:down|ssc:100037921,SLA-DQB1,100037921:down|ssc:404704,CD4,404704:down|ssc:397614,IL4R,397614:down|ssc:100271930,IL7R,100271930:down|ssc:100621544,RNF19B,100621544:down|ssc:100627693,RAB7B,100627693:down|ssc:396900,AMCF-II,396900:down|ssc:1005164…	http://amigo.geneontology.org/cgi-bin/amigo/term_details?term=GO:0006955
positive regulation of cell migration	Biological Process	GO:0030335	26	78	1.70082e-10	2.95975e-07	ssc:396900,AMCF-II,396900:down|ssc:396927,ZP3,396927:up|ssc:100127483,BMPR2,100127483:down|ssc:100525528,-,100525528:down|ssc:100621675,-,100621675:down|ssc:100524561,PPBP,100524561:down|ssc:397564,HBEGF,397564:down|ssc:100153791,CYR61,100153791:down|ssc:414372,CCR2,414372:down|ssc:780421,CMKLR1,780421:down|ssc:100113425,BMP4,100113425:down|ssc:100169702,PROX1,100169702:down|ssc:397497,FGF1,39749…	http://amigo.geneontology.org/cgi-bin/amigo/term_details?term=GO:0030335
biological adhesion	Biological Process	GO:0022610	58	300	2.07739e-10	2.95975e-07	ssc:100627882,CYTIP,100627882:down|ssc:100126293,CASS4,100126293:down|ssc:396724,OLR1,396724:down|ssc:396927,ZP3,396927:up|ssc:100522873,EPHA2,100522873:down|ssc:100621027,CX3CL1,100621027:down|ssc:100127489,S100A9,100127489:down|ssc:100621675,-,100621675:down|ssc:397492,DPP4,397492:down|ssc:100153191,SIT1,100153191:up|ssc:445528,HLA-DMA,445528:down|ssc:397620,FN1,397620:down|ssc:100627019,ABL2,1…	http://amigo.geneontology.org/cgi-bin/amigo/term_details?term=GO:0022610
cell migration	Biological Process	GO:0016477	55	278	2.57369e-10	2.95975e-07	ssc:396927,ZP3,396927:up|ssc:100522873,EPHA2,100522873:down|ssc:100621027,CX3CL1,100621027:down|ssc:100523837,PRR5L,100523837:down|ssc:494467,CXCL14,494467:down|ssc:100127489,S100A9,100127489:down|ssc:100621675,-,100621675:down|ssc:397492,DPP4,397492:down|ssc:100524561,PPBP,100524561:down|ssc:780421,CMKLR1,780421:down|ssc:100620216,-,100620216:down|ssc:100627019,ABL2,100627019:down|ssc:100520585,…	http://amigo.geneontology.org/cgi-bin/amigo/term_details?term=GO:0016477
cell chemotaxis	Biological Process	GO:0060326	25	75	3.85048e-10	3.34041e-07	ssc:396900,AMCF-II,396900:down|ssc:100522873,EPHA2,100522873:down|ssc:100621027,CX3CL1,100621027:down|ssc:494467,CXCL14,494467:down|ssc:100127489,S100A9,100127489:down|ssc:100525528,-,100525528:down|ssc:100621675,-,100621675:down|ssc:100515612,C5AR2,100515612:down|ssc:100524561,PPBP,100524561:down|ssc:414904,CXCL2,414904:down|ssc:414372,CCR2,414372:down|ssc:780421,CMKLR1,780421:down|ssc:100516296…	http://amigo.geneontology.org/cgi-bin/amigo/term_details?term=GO:0060326
cell adhesion	Biological Process	GO:0007155	57	297	4.06659e-10	3.34041e-07	ssc:100627882,CYTIP,100627882:down|ssc:100126293,CASS4,100126293:down|ssc:396724,OLR1,396724:down|ssc:396927,ZP3,396927:up|ssc:100522873,EPHA2,100522873:down|ssc:100621027,CX3CL1,100621027:down|ssc:100127489,S100A9,100127489:down|ssc:100621675,-,100621675:down|ssc:397492,DPP4,397492:down|ssc:100153191,SIT1,100153191:up|ssc:445528,HLA-DMA,445528:down|ssc:397620,FN1,397620:down|ssc:100627019,ABL2,1…	http://amigo.geneontology.org/cgi-bin/amigo/term_details?term=GO:0007155
extracellular region	Cellular Component	GO:0005576	160	1270	4.91547e-10	3.53299e-07	ssc:497237,SCG2,497237:down|ssc:100270814,-,100270814:down|ssc:100155399,PNLIPRP1,100155399:up|ssc:397122,IL1B1,397122:down|ssc:100621027,CX3CL1,100621027:down|ssc:100624677,HNMT,100624677:down|ssc:100621675,-,100621675:down|ssc:396915,EDN1,396915:down|ssc:397620,FN1,397620:down|ssc:100270722,ARF5,100270722:up|ssc:100154994,SERPINB10,100154994:down|ssc:100522360,-,100522360:down|ssc:100623926,PRR…	http://amigo.geneontology.org/cgi-bin/amigo/term_details?term=GO:0005576
positive regulation of cell motility	Biological Process	GO:2000147	26	84	1.06998e-09	6.37872e-07	ssc:396900,AMCF-II,396900:down|ssc:396927,ZP3,396927:up|ssc:100127483,BMPR2,100127483:down|ssc:100525528,-,100525528:down|ssc:100621675,-,100621675:down|ssc:100524561,PPBP,100524561:down|ssc:397564,HBEGF,397564:down|ssc:100153791,CYR61,100153791:down|ssc:414372,CCR2,414372:down|ssc:780421,CMKLR1,780421:down|ssc:100113425,BMP4,100113425:down|ssc:100169702,PROX1,100169702:down|ssc:397497,FGF1,39749…	http://amigo.geneontology.org/cgi-bin/amigo/term_details?term=GO:2000147
leukocyte migration	Biological Process	GO:0050900	24	73	1.20065e-09	6.37872e-07	ssc:396900,AMCF-II,396900:down|ssc:396927,ZP3,396927:up|ssc:100621027,CX3CL1,100621027:down|ssc:100127489,S100A9,100127489:down|ssc:100525528,-,100525528:down|ssc:100621675,-,100621675:down|ssc:100515612,C5AR2,100515612:down|ssc:100524561,PPBP,100524561:down|ssc:100516668,RABGEF1,100516668:down|ssc:414372,CCR2,414372:down|ssc:780421,CMKLR1,780421:down|ssc:100620216,-,100620216:down|ssc:414374,CCR…	http://amigo.geneontology.org/cgi-bin/amigo/term_details?term=GO:0050900
cellular response to chemical stimulus	Biological Process	GO:0070887	83	528	1.24651e-09	6.37872e-07	ssc:100286778,PDK4,100286778:down|ssc:397122,IL1B1,397122:down|ssc:100522873,EPHA2,100522873:down|ssc:100621027,CX3CL1,100621027:down|ssc:494467,CXCL14,494467:down|ssc:100621675,-,100621675:down|ssc:396665,-,396665:down|ssc:780421,CMKLR1,780421:down|ssc:100037292,ACKR4,100037292:down|ssc:100144523,PMEPA1,100144523:down|ssc:100127164,PTGER2,100127164:down|ssc:654298,ID2,654298:down|ssc:100517086,C…	http://amigo.geneontology.org/cgi-bin/amigo/term_details?term=GO:0070887
chemotaxis	Biological Process	GO:0006935	35	142	1.44214e-09	6.37872e-07	ssc:414375,XCR1,414375:down|ssc:100522873,EPHA2,100522873:down|ssc:100621027,CX3CL1,100621027:down|ssc:494467,CXCL14,494467:down|ssc:100127489,S100A9,100127489:down|ssc:100621675,-,100621675:down|ssc:100524561,PPBP,100524561:down|ssc:780421,CMKLR1,780421:down|ssc:100037292,ACKR4,100037292:down|ssc:100620216,-,100620216:down|ssc:100038004,EGR2,100038004:down|ssc:397087,SPP1,397087:down|ssc:1001559…	http://amigo.geneontology.org/cgi-bin/amigo/term_details?term=GO:0006935
taxis	Biological Process	GO:0042330	35	142	1.44214e-09	6.37872e-07	ssc:414375,XCR1,414375:down|ssc:100522873,EPHA2,100522873:down|ssc:100621027,CX3CL1,100621027:down|ssc:494467,CXCL14,494467:down|ssc:100127489,S100A9,100127489:down|ssc:100621675,-,100621675:down|ssc:100524561,PPBP,100524561:down|ssc:780421,CMKLR1,780421:down|ssc:100037292,ACKR4,100037292:down|ssc:100620216,-,100620216:down|ssc:100038004,EGR2,100038004:down|ssc:397087,SPP1,397087:down|ssc:1001559…	http://amigo.geneontology.org/cgi-bin/amigo/term_details?term=GO:0042330
positive regulation of immune system process	Biological Process	GO:0002684	42	192	1.67292e-09	6.87092e-07	ssc:399541,TLR4,399541:down|ssc:396927,ZP3,396927:up|ssc:100627308,-,100627308:down|ssc:100621675,-,100621675:down|ssc:397492,DPP4,397492:down|ssc:100524561,PPBP,100524561:down|ssc:780421,CMKLR1,780421:down|ssc:100521992,HCLS1,100521992:down|ssc:445528,HLA-DMA,445528:down|ssc:100620216,-,100620216:down|ssc:100038025,CLEC7A,100038025:down|ssc:654298,ID2,654298:down|ssc:100049663,EDN3,100049663:up|…	http://amigo.geneontology.org/cgi-bin/amigo/term_details?term=GO:0002684
positive regulation of biological process	Biological Process	GO:0048518	154	1233	2.42192e-09	8.96314e-07	ssc:100270814,-,100270814:down|ssc:397122,IL1B1,397122:down|ssc:100621027,CX3CL1,100621027:down|ssc:396851,PIK3R5,396851:down|ssc:100622059,KCTD11,100622059:down|ssc:100152404,HEY2,100152404:down|ssc:100153460,AKAP5,100153460:down|ssc:100621675,-,100621675:down|ssc:396665,-,396665:down|ssc:100145894,JTB,100145894:up|ssc:780421,CMKLR1,780421:down|ssc:397620,FN1,397620:down|ssc:100519335,IFT57,1005…	http://amigo.geneontology.org/cgi-bin/amigo/term_details?term=GO:0048518
positive regulation of cellular component movement	Biological Process	GO:0051272	26	87	2.49409e-09	8.96314e-07	ssc:396900,AMCF-II,396900:down|ssc:396927,ZP3,396927:up|ssc:100127483,BMPR2,100127483:down|ssc:100525528,-,100525528:down|ssc:100621675,-,100621675:down|ssc:100524561,PPBP,100524561:down|ssc:397564,HBEGF,397564:down|ssc:100153791,CYR61,100153791:down|ssc:414372,CCR2,414372:down|ssc:780421,CMKLR1,780421:down|ssc:100113425,BMP4,100113425:down|ssc:100169702,PROX1,100169702:down|ssc:397497,FGF1,39749…	http://amigo.geneontology.org/cgi-bin/amigo/term_details?term=GO:0051272
leukocyte chemotaxis	Biological Process	GO:0030595	20	54	2.77942e-09	9.40098e-07	ssc:396900,AMCF-II,396900:down|ssc:100621027,CX3CL1,100621027:down|ssc:100127489,S100A9,100127489:down|ssc:100525528,-,100525528:down|ssc:100621675,-,100621675:down|ssc:100515612,C5AR2,100515612:down|ssc:100524561,PPBP,100524561:down|ssc:414372,CCR2,414372:down|ssc:780421,CMKLR1,780421:down|ssc:100620216,-,100620216:down|ssc:100525396,-,100525396:down|ssc:100049663,EDN3,100049663:up|ssc:396880,-,…	http://amigo.geneontology.org/cgi-bin/amigo/term_details?term=GO:0030595
regulation of cell migration	Biological Process	GO:0030334	34	139	3.09302e-09	9.88049e-07	ssc:396927,ZP3,396927:up|ssc:100522873,EPHA2,100522873:down|ssc:100523837,PRR5L,100523837:down|ssc:100621675,-,100621675:down|ssc:100524561,PPBP,100524561:down|ssc:780421,CMKLR1,780421:down|ssc:100517086,CSF1R,100517086:down|ssc:100049663,EDN3,100049663:up|ssc:100155367,RAP2A,100155367:down|ssc:396900,AMCF-II,396900:down|ssc:100525528,-,100525528:down|ssc:100127483,BMPR2,100127483:down|ssc:100515…	http://amigo.geneontology.org/cgi-bin/amigo/term_details?term=GO:0030334
regulation of immune system process	Biological Process	GO:0002682	51	266	3.81201e-09	1.15363e-06	ssc:399541,TLR4,399541:down|ssc:396927,ZP3,396927:up|ssc:100627308,-,100627308:down|ssc:100621675,-,100621675:down|ssc:397492,DPP4,397492:down|ssc:100524561,PPBP,100524561:down|ssc:100153191,SIT1,100153191:up|ssc:780421,CMKLR1,780421:down|ssc:100521992,HCLS1,100521992:down|ssc:445528,HLA-DMA,445528:down|ssc:100620216,-,100620216:down|ssc:100038025,CLEC7A,100038025:down|ssc:654298,ID2,654298:down|…	http://amigo.geneontology.org/cgi-bin/amigo/term_details?term=GO:0002682
cell motility	Biological Process	GO:0048870	55	300	4.87446e-09	1.33467e-06	ssc:396927,ZP3,396927:up|ssc:100522873,EPHA2,100522873:down|ssc:100621027,CX3CL1,100621027:down|ssc:100523837,PRR5L,100523837:down|ssc:494467,CXCL14,494467:down|ssc:100127489,S100A9,100127489:down|ssc:100621675,-,100621675:down|ssc:397492,DPP4,397492:down|ssc:100524561,PPBP,100524561:down|ssc:780421,CMKLR1,780421:down|ssc:100620216,-,100620216:down|ssc:100627019,ABL2,100627019:down|ssc:100520585,…	http://amigo.geneontology.org/cgi-bin/amigo/term_details?term=GO:0048870
localization of cell	Biological Process	GO:0051674	55	300	4.87446e-09	1.33467e-06	ssc:396927,ZP3,396927:up|ssc:100522873,EPHA2,100522873:down|ssc:100621027,CX3CL1,100621027:down|ssc:100523837,PRR5L,100523837:down|ssc:494467,CXCL14,494467:down|ssc:100127489,S100A9,100127489:down|ssc:100621675,-,100621675:down|ssc:397492,DPP4,397492:down|ssc:100524561,PPBP,100524561:down|ssc:780421,CMKLR1,780421:down|ssc:100620216,-,100620216:down|ssc:100627019,ABL2,100627019:down|ssc:100520585,…	http://amigo.geneontology.org/cgi-bin/amigo/term_details?term=GO:0051674
positive regulation of locomotion	Biological Process	GO:0040017	26	90	5.56611e-09	1.42423e-06	ssc:396900,AMCF-II,396900:down|ssc:396927,ZP3,396927:up|ssc:100127483,BMPR2,100127483:down|ssc:100525528,-,100525528:down|ssc:100621675,-,100621675:down|ssc:100524561,PPBP,100524561:down|ssc:397564,HBEGF,397564:down|ssc:100153791,CYR61,100153791:down|ssc:414372,CCR2,414372:down|ssc:780421,CMKLR1,780421:down|ssc:100113425,BMP4,100113425:down|ssc:100169702,PROX1,100169702:down|ssc:397497,FGF1,39749…	http://amigo.geneontology.org/cgi-bin/amigo/term_details?term=GO:0040017
regulation of cell motility	Biological Process	GO:2000145	35	149	5.69692e-09	1.42423e-06	ssc:396927,ZP3,396927:up|ssc:100522873,EPHA2,100522873:down|ssc:100523837,PRR5L,100523837:down|ssc:100621675,-,100621675:down|ssc:100524561,PPBP,100524561:down|ssc:780421,CMKLR1,780421:down|ssc:100517086,CSF1R,100517086:down|ssc:100049663,EDN3,100049663:up|ssc:100155367,RAP2A,100155367:down|ssc:396900,AMCF-II,396900:down|ssc:100525528,-,100525528:down|ssc:100127483,BMPR2,100127483:down|ssc:100515…	http://amigo.geneontology.org/cgi-bin/amigo/term_details?term=GO:2000145
regulation of cell proliferation	Biological Process	GO:0042127	62	361	6.80996e-09	1.63155e-06	ssc:396927,ZP3,396927:up|ssc:396951,PTHLH,396951:up|ssc:100627308,-,100627308:down|ssc:100622059,KCTD11,100622059:down|ssc:396628,VDR,396628:down|ssc:100152404,HEY2,100152404:down|ssc:100621675,-,100621675:down|ssc:397492,DPP4,397492:down|ssc:396665,-,396665:down|ssc:100153176,SFRP5,100153176:down|ssc:100524561,PPBP,100524561:down|ssc:100145894,JTB,100145894:up|ssc:100521992,HCLS1,100521992:down|…	http://amigo.geneontology.org/cgi-bin/amigo/term_details?term=GO:0042127
regulation of response to stimulus	Biological Process	GO:0048583	110	804	7.52666e-09	1.73113e-06	ssc:100270814,-,100270814:down|ssc:397122,IL1B1,397122:down|ssc:100522873,EPHA2,100522873:down|ssc:100621027,CX3CL1,100621027:down|ssc:396851,PIK3R5,396851:down|ssc:100622059,KCTD11,100622059:down|ssc:100152404,HEY2,100152404:down|ssc:100153460,AKAP5,100153460:down|ssc:100621675,-,100621675:down|ssc:100153176,SFRP5,100153176:down|ssc:100154195,-,100154195:down|ssc:780421,CMKLR1,780421:down|ssc:10…	http://amigo.geneontology.org/cgi-bin/amigo/term_details?term=GO:0048583
locomotion	Biological Process	GO:0040011	62	365	1.05757e-08	2.33886e-06	ssc:414375,XCR1,414375:down|ssc:396927,ZP3,396927:up|ssc:100522873,EPHA2,100522873:down|ssc:100621027,CX3CL1,100621027:down|ssc:100523837,PRR5L,100523837:down|ssc:494467,CXCL14,494467:down|ssc:100127489,S100A9,100127489:down|ssc:100621675,-,100621675:down|ssc:397492,DPP4,397492:down|ssc:100524561,PPBP,100524561:down|ssc:780421,CMKLR1,780421:down|ssc:100037292,ACKR4,100037292:down|ssc:100620216,-,…	http://amigo.geneontology.org/cgi-bin/amigo/term_details?term=GO:0040011
regulation of leukocyte migration	Biological Process	GO:0002685	17	43	1.38835e-08	2.95668e-06	ssc:396900,AMCF-II,396900:down|ssc:396927,ZP3,396927:up|ssc:100525528,-,100525528:down|ssc:100621675,-,100621675:down|ssc:100515612,C5AR2,100515612:down|ssc:100524561,PPBP,100524561:down|ssc:100516668,RABGEF1,100516668:down|ssc:414372,CCR2,414372:down|ssc:780421,CMKLR1,780421:down|ssc:100525396,-,100525396:down|ssc:100049663,EDN3,100049663:up|ssc:396880,-,396880:down|ssc:414374,CCR1,414374:down|s…	http://amigo.geneontology.org/cgi-bin/amigo/term_details?term=GO:0002685
cell proliferation	Biological Process	GO:0008283	70	445	2.95046e-08	6.00242e-06	ssc:100522873,EPHA2,100522873:down|ssc:100622059,KCTD11,100622059:down|ssc:100152404,HEY2,100152404:down|ssc:100621675,-,100621675:down|ssc:397492,DPP4,397492:down|ssc:396665,-,396665:down|ssc:100153176,SFRP5,100153176:down|ssc:100145894,JTB,100145894:up|ssc:100152038,OSM,100152038:down|ssc:100519335,IFT57,100519335:up|ssc:100127164,PTGER2,100127164:down|ssc:654298,ID2,654298:down|ssc:100517086,C…	http://amigo.geneontology.org/cgi-bin/amigo/term_details?term=GO:0008283
inflammatory response	Biological Process	GO:0006954	32	137	3.02731e-08	6.00242e-06	ssc:399541,TLR4,399541:down|ssc:396724,OLR1,396724:down|ssc:397122,IL1B1,397122:down|ssc:396927,ZP3,396927:up|ssc:100621027,CX3CL1,100621027:down|ssc:100127489,S100A9,100127489:down|ssc:100154607,S1PR3,100154607:down|ssc:100524561,PPBP,100524561:down|ssc:100524418,PTGDR,100524418:down|ssc:100620479,NRROS,100620479:down|ssc:397246,VNN1,397246:up|ssc:396766,CELA1,396766:up|ssc:397614,IL4R,397614:do…	http://amigo.geneontology.org/cgi-bin/amigo/term_details?term=GO:0006954
regulation of cellular component movement	Biological Process	GO:0051270	36	166	3.26185e-08	6.25188e-06	ssc:396927,ZP3,396927:up|ssc:100522873,EPHA2,100522873:down|ssc:100523837,PRR5L,100523837:down|ssc:100621675,-,100621675:down|ssc:100524561,PPBP,100524561:down|ssc:780421,CMKLR1,780421:down|ssc:100517086,CSF1R,100517086:down|ssc:100049663,EDN3,100049663:up|ssc:100155367,RAP2A,100155367:down|ssc:396900,AMCF-II,396900:down|ssc:100525528,-,100525528:down|ssc:100127483,BMPR2,100127483:down|ssc:100515…	http://amigo.geneontology.org/cgi-bin/amigo/term_details?term=GO:0051270
movement of cell or subcellular component	Biological Process	GO:0006928	61	368	3.62441e-08	6.72269e-06	ssc:396927,ZP3,396927:up|ssc:100522873,EPHA2,100522873:down|ssc:100621027,CX3CL1,100621027:down|ssc:100523837,PRR5L,100523837:down|ssc:494467,CXCL14,494467:down|ssc:100127489,S100A9,100127489:down|ssc:100621675,-,100621675:down|ssc:397492,DPP4,397492:down|ssc:100524561,PPBP,100524561:down|ssc:780421,CMKLR1,780421:down|ssc:100620216,-,100620216:down|ssc:100519335,IFT57,100519335:up|ssc:100627019,A…	http://amigo.geneontology.org/cgi-bin/amigo/term_details?term=GO:0006928
positive regulation of leukocyte migration	Biological Process	GO:0002687	15	36	4.32607e-08	7.77341e-06	ssc:396900,AMCF-II,396900:down|ssc:396927,ZP3,396927:up|ssc:100525528,-,100525528:down|ssc:100621675,-,100621675:down|ssc:414374,CCR1,414374:down|ssc:396880,-,396880:down|ssc:100049663,EDN3,100049663:up|ssc:100525396,-,100525396:down|ssc:100524561,PPBP,100524561:down|ssc:414372,CCR2,414372:down|ssc:780421,CMKLR1,780421:down|ssc:100519703,F2RL1,100519703:down|ssc:397271,AIF1,397271:down|ssc:396623…	http://amigo.geneontology.org/cgi-bin/amigo/term_details?term=GO:0002687
extracellular region part	Cellular Component	GO:0044421	134	1077	5.55245e-08	9.67472e-06	ssc:100270814,-,100270814:down|ssc:397122,IL1B1,397122:down|ssc:100624677,HNMT,100624677:down|ssc:100621675,-,100621675:down|ssc:397620,FN1,397620:down|ssc:100270722,ARF5,100270722:up|ssc:100154994,SERPINB10,100154994:down|ssc:100522360,-,100522360:down|ssc:445513,HAPLN1,445513:up|ssc:403163,EPCAM,403163:down|ssc:100155367,RAP2A,100155367:down|ssc:100513228,BAIAP2,100513228:down|ssc:733603,-,7336…	http://amigo.geneontology.org/cgi-bin/amigo/term_details?term=GO:0044421
myeloid leukocyte migration	Biological Process	GO:0097529	16	42	6.95387e-08	1.17602e-05	ssc:100621027,CX3CL1,100621027:down|ssc:100127489,S100A9,100127489:down|ssc:100621675,-,100621675:down|ssc:100515612,C5AR2,100515612:down|ssc:100524561,PPBP,100524561:down|ssc:414372,CCR2,414372:down|ssc:780421,CMKLR1,780421:down|ssc:100620216,-,100620216:down|ssc:100049663,EDN3,100049663:up|ssc:396880,-,396880:down|ssc:397087,SPP1,397087:down|ssc:414374,CCR1,414374:down|ssc:397271,AIF1,397271:do…	http://amigo.geneontology.org/cgi-bin/amigo/term_details?term=GO:0097529
regulation of locomotion	Biological Process	GO:0040012	35	166	1.07488e-07	1.76588e-05	ssc:396927,ZP3,396927:up|ssc:100522873,EPHA2,100522873:down|ssc:100523837,PRR5L,100523837:down|ssc:100621675,-,100621675:down|ssc:100524561,PPBP,100524561:down|ssc:780421,CMKLR1,780421:down|ssc:100517086,CSF1R,100517086:down|ssc:100049663,EDN3,100049663:up|ssc:100155367,RAP2A,100155367:down|ssc:396900,AMCF-II,396900:down|ssc:100525528,-,100525528:down|ssc:100127483,BMPR2,100127483:down|ssc:100515…	http://amigo.geneontology.org/cgi-bin/amigo/term_details?term=GO:0040012
cell activation	Biological Process	GO:0001775	40	205	1.22953e-07	1.94249e-05	ssc:399541,TLR4,399541:down|ssc:100127155,LMO4,100127155:up|ssc:396927,ZP3,396927:up|ssc:397492,DPP4,397492:down|ssc:396665,-,396665:down|ssc:100524561,PPBP,100524561:down|ssc:100153191,SIT1,100153191:up|ssc:445528,HLA-DMA,445528:down|ssc:100627019,ABL2,100627019:down|ssc:654298,ID2,654298:down|ssc:100152253,STX11,100152253:down|ssc:397246,VNN1,397246:up|ssc:100522131,FKBP1B,100522131:down|ssc:39…	http://amigo.geneontology.org/cgi-bin/amigo/term_details?term=GO:0001775
positive regulation of response to stimulus	Biological Process	GO:0048584	71	470	1.24995e-07	1.94249e-05	ssc:100270814,-,100270814:down|ssc:397122,IL1B1,397122:down|ssc:100621027,CX3CL1,100621027:down|ssc:396851,PIK3R5,396851:down|ssc:100153460,AKAP5,100153460:down|ssc:100621675,-,100621675:down|ssc:780421,CMKLR1,780421:down|ssc:100152038,OSM,100152038:down|ssc:445528,HLA-DMA,445528:down|ssc:100517086,CSF1R,100517086:down|ssc:100049663,EDN3,100049663:up|ssc:397614,IL4R,397614:down|ssc:100624161,G0S2…	http://amigo.geneontology.org/cgi-bin/amigo/term_details?term=GO:0048584
regulation of leukocyte chemotaxis	Biological Process	GO:0002688	14	34	1.47539e-07	2.23249e-05	ssc:396900,AMCF-II,396900:down|ssc:100525528,-,100525528:down|ssc:100621675,-,100621675:down|ssc:100515612,C5AR2,100515612:down|ssc:414374,CCR1,414374:down|ssc:396880,-,396880:down|ssc:100049663,EDN3,100049663:up|ssc:100525396,-,100525396:down|ssc:100524561,PPBP,100524561:down|ssc:414372,CCR2,414372:down|ssc:780421,CMKLR1,780421:down|ssc:100519703,F2RL1,100519703:down|ssc:397271,AIF1,397271:down|…	http://amigo.geneontology.org/cgi-bin/amigo/term_details?term=GO:0002688
leukocyte activation	Biological Process	GO:0045321	35	169	1.71461e-07	2.52795e-05	ssc:399541,TLR4,399541:down|ssc:396927,ZP3,396927:up|ssc:397492,DPP4,397492:down|ssc:100524561,PPBP,100524561:down|ssc:100153191,SIT1,100153191:up|ssc:445528,HLA-DMA,445528:down|ssc:100627019,ABL2,100627019:down|ssc:654298,ID2,654298:down|ssc:100152253,STX11,100152253:down|ssc:397246,VNN1,397246:up|ssc:100522131,FKBP1B,100522131:down|ssc:397614,IL4R,397614:down|ssc:100271930,IL7R,100271930:down|s…	http://amigo.geneontology.org/cgi-bin/amigo/term_details?term=GO:0045321
regulation of multicellular organismal process	Biological Process	GO:0051239	84	596	1.81754e-07	2.61271e-05	ssc:100286778,PDK4,100286778:down|ssc:396724,OLR1,396724:down|ssc:100522873,EPHA2,100522873:down|ssc:100621027,CX3CL1,100621027:down|ssc:100622059,KCTD11,100622059:down|ssc:100152404,HEY2,100152404:down|ssc:100154607,S1PR3,100154607:down|ssc:396665,-,396665:down|ssc:100153176,SFRP5,100153176:down|ssc:780421,CMKLR1,780421:down|ssc:445528,HLA-DMA,445528:down|ssc:396915,EDN1,396915:down|ssc:397620,F…	http://amigo.geneontology.org/cgi-bin/amigo/term_details?term=GO:0051239
neutrophil chemotaxis	Biological Process	GO:0030593	11	22	2.96744e-07	4.06257e-05	ssc:100621027,CX3CL1,100621027:down|ssc:100127489,S100A9,100127489:down|ssc:100621675,-,100621675:down|ssc:100515612,C5AR2,100515612:down|ssc:397087,SPP1,397087:down|ssc:396880,-,396880:down|ssc:100049663,EDN3,100049663:up|ssc:100524561,PPBP,100524561:down|ssc:100620216,-,100620216:down|ssc:397406,FCER1G,397406:down|ssc:100620730,-,100620730:down	http://amigo.geneontology.org/cgi-bin/amigo/term_details?term=GO:0030593
neutrophil migration	Biological Process	GO:1990266	11	22	2.96744e-07	4.06257e-05	ssc:100621027,CX3CL1,100621027:down|ssc:100127489,S100A9,100127489:down|ssc:100621675,-,100621675:down|ssc:100515612,C5AR2,100515612:down|ssc:397087,SPP1,397087:down|ssc:396880,-,396880:down|ssc:100049663,EDN3,100049663:up|ssc:100524561,PPBP,100524561:down|ssc:100620216,-,100620216:down|ssc:397406,FCER1G,397406:down|ssc:100620730,-,100620730:down	http://amigo.geneontology.org/cgi-bin/amigo/term_details?term=GO:1990266
positive regulation of leukocyte chemotaxis	Biological Process	GO:0002690	13	32	5.01637e-07	6.70793e-05	ssc:396900,AMCF-II,396900:down|ssc:100525528,-,100525528:down|ssc:100621675,-,100621675:down|ssc:414374,CCR1,414374:down|ssc:396880,-,396880:down|ssc:100049663,EDN3,100049663:up|ssc:100525396,-,100525396:down|ssc:100524561,PPBP,100524561:down|ssc:414372,CCR2,414372:down|ssc:780421,CMKLR1,780421:down|ssc:100519703,F2RL1,100519703:down|ssc:397271,AIF1,397271:down|ssc:100620730,-,100620730:down	http://amigo.geneontology.org/cgi-bin/amigo/term_details?term=GO:0002690
cellular response to organic substance	Biological Process	GO:0071310	65	432	5.30164e-07	6.92828e-05	ssc:100286778,PDK4,100286778:down|ssc:397122,IL1B1,397122:down|ssc:100621027,CX3CL1,100621027:down|ssc:396665,-,396665:down|ssc:780421,CMKLR1,780421:down|ssc:100037292,ACKR4,100037292:down|ssc:100144523,PMEPA1,100144523:down|ssc:100127164,PTGER2,100127164:down|ssc:100517086,CSF1R,100517086:down|ssc:100038004,EGR2,100038004:down|ssc:100512012,WFIKKN2,100512012:up|ssc:397614,IL4R,397614:down|ssc:10…	http://amigo.geneontology.org/cgi-bin/amigo/term_details?term=GO:0071310
defense response	Biological Process	GO:0006952	54	336	6.62778e-07	8.32698e-05	ssc:100519446,PLD1,100519446:down|ssc:399541,TLR4,399541:down|ssc:396724,OLR1,396724:down|ssc:397122,IL1B1,397122:down|ssc:396927,ZP3,396927:up|ssc:100627308,-,100627308:down|ssc:100621027,CX3CL1,100621027:down|ssc:100127489,S100A9,100127489:down|ssc:100154607,S1PR3,100154607:down|ssc:100524561,PPBP,100524561:down|ssc:100514958,SLAMF8,100514958:down|ssc:100524418,PTGDR,100524418:down|ssc:397201,J…	http://amigo.geneontology.org/cgi-bin/amigo/term_details?term=GO:0006952
positive regulation of cellular process	Biological Process	GO:0048522	131	1090	6.66159e-07	8.32698e-05	ssc:100270814,-,100270814:down|ssc:397122,IL1B1,397122:down|ssc:100621027,CX3CL1,100621027:down|ssc:396851,PIK3R5,396851:down|ssc:100622059,KCTD11,100622059:down|ssc:100152404,HEY2,100152404:down|ssc:100153460,AKAP5,100153460:down|ssc:100621675,-,100621675:down|ssc:396665,-,396665:down|ssc:100145894,JTB,100145894:up|ssc:780421,CMKLR1,780421:down|ssc:397620,FN1,397620:down|ssc:100519335,IFT57,1005…	http://amigo.geneontology.org/cgi-bin/amigo/term_details?term=GO:0048522
positive regulation of response to external stimulus	Biological Process	GO:0032103	19	66	6.94535e-07	8.33857e-05	ssc:396900,AMCF-II,396900:down|ssc:396927,ZP3,396927:up|ssc:100621027,CX3CL1,100621027:down|ssc:100127483,BMPR2,100127483:down|ssc:100127489,S100A9,100127489:down|ssc:100525528,-,100525528:down|ssc:100621675,-,100621675:down|ssc:100524561,PPBP,100524561:down|ssc:414372,CCR2,414372:down|ssc:780421,CMKLR1,780421:down|ssc:100525396,-,100525396:down|ssc:100049663,EDN3,100049663:up|ssc:396880,-,396880…	http://amigo.geneontology.org/cgi-bin/amigo/term_details?term=GO:0032103
granulocyte chemotaxis	Biological Process	GO:0071621	12	28	6.96089e-07	8.33857e-05	ssc:100621027,CX3CL1,100621027:down|ssc:100127489,S100A9,100127489:down|ssc:100621675,-,100621675:down|ssc:100515612,C5AR2,100515612:down|ssc:397087,SPP1,397087:down|ssc:396880,-,396880:down|ssc:100049663,EDN3,100049663:up|ssc:100524561,PPBP,100524561:down|ssc:780421,CMKLR1,780421:down|ssc:100620216,-,100620216:down|ssc:397406,FCER1G,397406:down|ssc:100620730,-,100620730:down	http://amigo.geneontology.org/cgi-bin/amigo/term_details?term=GO:0071621
cell surface	Cellular Component	GO:0009986	34	171	7.10652e-07	8.33928e-05	ssc:100522873,EPHA2,100522873:down|ssc:100621027,CX3CL1,100621027:down|ssc:100621355,MXRA8,100621355:up|ssc:397492,DPP4,397492:down|ssc:445528,HLA-DMA,445528:down|ssc:396806,BSP1,396806:up|ssc:100155091,ITGA5,100155091:down|ssc:100517086,CSF1R,100517086:down|ssc:100156280,GREM1,100156280:down|ssc:100516729,STAMBP,100516729:down|ssc:100156882,FURIN,100156882:down|ssc:403163,EPCAM,403163:down|ssc:1…	http://amigo.geneontology.org/cgi-bin/amigo/term_details?term=GO:0009986
response to organic substance	Biological Process	GO:0010033	75	529	7.32803e-07	8.42723e-05	ssc:100286778,PDK4,100286778:down|ssc:397122,IL1B1,397122:down|ssc:100522873,EPHA2,100522873:down|ssc:100621027,CX3CL1,100621027:down|ssc:396665,-,396665:down|ssc:780421,CMKLR1,780421:down|ssc:100037292,ACKR4,100037292:down|ssc:100144523,PMEPA1,100144523:down|ssc:100127164,PTGER2,100127164:down|ssc:100517086,CSF1R,100517086:down|ssc:100038004,EGR2,100038004:down|ssc:100512012,WFIKKN2,100512012:up…	http://amigo.geneontology.org/cgi-bin/amigo/term_details?term=GO:0010033
regulation of chemotaxis	Biological Process	GO:0050920	15	44	9.65032e-07	0.000108803	ssc:396900,AMCF-II,396900:down|ssc:100127483,BMPR2,100127483:down|ssc:100525528,-,100525528:down|ssc:100621675,-,100621675:down|ssc:100515612,C5AR2,100515612:down|ssc:414374,CCR1,414374:down|ssc:396880,-,396880:down|ssc:100049663,EDN3,100049663:up|ssc:100525396,-,100525396:down|ssc:100524561,PPBP,100524561:down|ssc:414372,CCR2,414372:down|ssc:780421,CMKLR1,780421:down|ssc:100519703,F2RL1,10051970…	http://amigo.geneontology.org/cgi-bin/amigo/term_details?term=GO:0050920
positive regulation of chemotaxis	Biological Process	GO:0050921	14	39	1.08943e-06	0.000119386	ssc:396900,AMCF-II,396900:down|ssc:100127483,BMPR2,100127483:down|ssc:100525528,-,100525528:down|ssc:100621675,-,100621675:down|ssc:414374,CCR1,414374:down|ssc:396880,-,396880:down|ssc:100049663,EDN3,100049663:up|ssc:100525396,-,100525396:down|ssc:100524561,PPBP,100524561:down|ssc:414372,CCR2,414372:down|ssc:780421,CMKLR1,780421:down|ssc:100519703,F2RL1,100519703:down|ssc:397271,AIF1,397271:down|…	http://amigo.geneontology.org/cgi-bin/amigo/term_details?term=GO:0050921
granulocyte migration	Biological Process	GO:0097530	12	29	1.10042e-06	0.000119386	ssc:100621027,CX3CL1,100621027:down|ssc:100127489,S100A9,100127489:down|ssc:100621675,-,100621675:down|ssc:100515612,C5AR2,100515612:down|ssc:397087,SPP1,397087:down|ssc:396880,-,396880:down|ssc:100049663,EDN3,100049663:up|ssc:100524561,PPBP,100524561:down|ssc:780421,CMKLR1,780421:down|ssc:100620216,-,100620216:down|ssc:397406,FCER1G,397406:down|ssc:100620730,-,100620730:down	http://amigo.geneontology.org/cgi-bin/amigo/term_details?term=GO:0097530
myeloid cell activation involved in immune response	Biological Process	GO:0002275	8	13	1.66552e-06	0.000177224	ssc:100155631,FES,100155631:down|ssc:100511161,PLA2G3,100511161:down|ssc:100152253,STX11,100152253:down|ssc:100524561,PPBP,100524561:down|ssc:100516668,RABGEF1,100516668:down|ssc:100519703,F2RL1,100519703:down|ssc:397405,TYROBP,397405:down|ssc:397406,FCER1G,397406:down	http://amigo.geneontology.org/cgi-bin/amigo/term_details?term=GO:0002275
myeloid leukocyte activation	Biological Process	GO:0002274	13	35	1.69519e-06	0.000177224	ssc:399541,TLR4,399541:down|ssc:100155631,FES,100155631:down|ssc:100511161,PLA2G3,100511161:down|ssc:396880,-,396880:down|ssc:100152253,STX11,100152253:down|ssc:100524561,PPBP,100524561:down|ssc:100516668,RABGEF1,100516668:down|ssc:100519703,F2RL1,100519703:down|ssc:397614,IL4R,397614:down|ssc:397106,IL10,397106:down|ssc:397405,TYROBP,397405:down|ssc:100620730,-,100620730:down|ssc:397406,FCER1G,3…	http://amigo.geneontology.org/cgi-bin/amigo/term_details?term=GO:0002274
hemopoiesis	Biological Process	GO:0030097	37	203	2.12911e-06	0.000218614	ssc:100522873,EPHA2,100522873:down|ssc:100521992,HCLS1,100521992:down|ssc:445528,HLA-DMA,445528:down|ssc:100622220,SLC25A38,100622220:up|ssc:397201,JAK2,397201:down|ssc:100627019,ABL2,100627019:down|ssc:100519098,SAMD9,100519098:down|ssc:654298,ID2,654298:down|ssc:100517086,CSF1R,100517086:down|ssc:100524095,PLD4,100524095:down|ssc:397246,VNN1,397246:up|ssc:397614,IL4R,397614:down|ssc:100038002,A…	http://amigo.geneontology.org/cgi-bin/amigo/term_details?term=GO:0030097
granulocyte activation	Biological Process	GO:0036230	7	10	2.24122e-06	0.00022219	ssc:100519703,F2RL1,100519703:down|ssc:397405,TYROBP,397405:down|ssc:100620730,-,100620730:down|ssc:397406,FCER1G,397406:down|ssc:396880,-,396880:down|ssc:100152253,STX11,100152253:down|ssc:100524561,PPBP,100524561:down	http://amigo.geneontology.org/cgi-bin/amigo/term_details?term=GO:0036230
neutrophil activation	Biological Process	GO:0042119	7	10	2.24122e-06	0.00022219	ssc:100519703,F2RL1,100519703:down|ssc:397405,TYROBP,397405:down|ssc:100620730,-,100620730:down|ssc:397406,FCER1G,397406:down|ssc:396880,-,396880:down|ssc:100152253,STX11,100152253:down|ssc:100524561,PPBP,100524561:down	http://amigo.geneontology.org/cgi-bin/amigo/term_details?term=GO:0042119
chemokine-mediated signaling pathway	Biological Process	GO:0070098	13	36	2.45827e-06	0.000239577	ssc:396900,AMCF-II,396900:down|ssc:414375,XCR1,414375:down|ssc:100525528,-,100525528:down|ssc:414374,CCR1,414374:down|ssc:396880,-,396880:down|ssc:100525396,-,100525396:down|ssc:100524561,PPBP,100524561:down|ssc:414372,CCR2,414372:down|ssc:780421,CMKLR1,780421:down|ssc:100737352,ACKR2,100737352:down|ssc:414371,CCR5,414371:down|ssc:100037292,ACKR4,100037292:down|ssc:100620730,-,100620730:down	http://amigo.geneontology.org/cgi-bin/amigo/term_details?term=GO:0070098
response to cytokine	Biological Process	GO:0034097	31	158	2.98507e-06	0.000285956	ssc:396900,AMCF-II,396900:down|ssc:414375,XCR1,414375:down|ssc:397122,IL1B1,397122:down|ssc:100621027,CX3CL1,100621027:down|ssc:100516458,TNFSF18,100516458:down|ssc:100525528,-,100525528:down|ssc:100524561,PPBP,100524561:down|ssc:100516668,RABGEF1,100516668:down|ssc:414372,CCR2,414372:down|ssc:100737352,ACKR2,100737352:down|ssc:780421,CMKLR1,780421:down|ssc:100521992,HCLS1,100521992:down|ssc:1001…	http://amigo.geneontology.org/cgi-bin/amigo/term_details?term=GO:0034097
positive regulation of behavior	Biological Process	GO:0048520	14	42	3.03362e-06	0.000285956	ssc:396900,AMCF-II,396900:down|ssc:100127483,BMPR2,100127483:down|ssc:100525528,-,100525528:down|ssc:100621675,-,100621675:down|ssc:414374,CCR1,414374:down|ssc:396880,-,396880:down|ssc:100049663,EDN3,100049663:up|ssc:100525396,-,100525396:down|ssc:100524561,PPBP,100524561:down|ssc:414372,CCR2,414372:down|ssc:780421,CMKLR1,780421:down|ssc:100519703,F2RL1,100519703:down|ssc:397271,AIF1,397271:down|…	http://amigo.geneontology.org/cgi-bin/amigo/term_details?term=GO:0048520
myeloid leukocyte mediated immunity	Biological Process	GO:0002444	8	14	3.60947e-06	0.000334749	ssc:396900,AMCF-II,396900:down|ssc:100155631,FES,100155631:down|ssc:100511161,PLA2G3,100511161:down|ssc:100152253,STX11,100152253:down|ssc:100524561,PPBP,100524561:down|ssc:100516668,RABGEF1,100516668:down|ssc:100519703,F2RL1,100519703:down|ssc:397406,FCER1G,397406:down	http://amigo.geneontology.org/cgi-bin/amigo/term_details?term=GO:0002444
response to external stimulus	Biological Process	GO:0009605	67	477	4.32736e-06	0.000394958	ssc:100519446,PLD1,100519446:down|ssc:100286778,PDK4,100286778:down|ssc:100522873,EPHA2,100522873:down|ssc:100621027,CX3CL1,100621027:down|ssc:494467,CXCL14,494467:down|ssc:100621675,-,100621675:down|ssc:780421,CMKLR1,780421:down|ssc:100037292,ACKR4,100037292:down|ssc:100127164,PTGER2,100127164:down|ssc:654298,ID2,654298:down|ssc:100038004,EGR2,100038004:down|ssc:100049663,EDN3,100049663:up|ssc:1…	http://amigo.geneontology.org/cgi-bin/amigo/term_details?term=GO:0009605
regulation of cell adhesion	Biological Process	GO:0030155	28	138	4.59565e-06	0.00041289	ssc:100627882,CYTIP,100627882:down|ssc:396927,ZP3,396927:up|ssc:100522873,EPHA2,100522873:down|ssc:100621027,CX3CL1,100621027:down|ssc:100516458,TNFSF18,100516458:down|ssc:100621675,-,100621675:down|ssc:397492,DPP4,397492:down|ssc:100153791,CYR61,100153791:down|ssc:100153191,SIT1,100153191:up|ssc:445528,HLA-DMA,445528:down|ssc:100155958,SRF,100155958:down|ssc:100525094,SASH3,100525094:down|ssc:10…	http://amigo.geneontology.org/cgi-bin/amigo/term_details?term=GO:0030155
cellular response to cytokine stimulus	Biological Process	GO:0071345	28	139	5.32346e-06	0.00046786	ssc:396900,AMCF-II,396900:down|ssc:414375,XCR1,414375:down|ssc:397122,IL1B1,397122:down|ssc:100621027,CX3CL1,100621027:down|ssc:100516458,TNFSF18,100516458:down|ssc:100525528,-,100525528:down|ssc:100524561,PPBP,100524561:down|ssc:100516668,RABGEF1,100516668:down|ssc:414372,CCR2,414372:down|ssc:100737352,ACKR2,100737352:down|ssc:780421,CMKLR1,780421:down|ssc:100521992,HCLS1,100521992:down|ssc:4143…	http://amigo.geneontology.org/cgi-bin/amigo/term_details?term=GO:0071345
response to bacterium	Biological Process	GO:0009617	26	124	5.37022e-06	0.00046786	ssc:100519446,PLD1,100519446:down|ssc:100521232,DEFB123,100521232:up|ssc:399541,TLR4,399541:down|ssc:396900,AMCF-II,396900:down|ssc:100525528,-,100525528:down|ssc:100154350,NFKBIL1,100154350:up|ssc:100524561,PPBP,100524561:down|ssc:100514958,SLAMF8,100514958:down|ssc:100513746,NOCT,100513746:down|ssc:414371,CCR5,414371:down|ssc:100620216,-,100620216:down|ssc:100127164,PTGER2,100127164:down|ssc:39…	http://amigo.geneontology.org/cgi-bin/amigo/term_details?term=GO:0009617
signal transduction by protein phosphorylation	Biological Process	GO:0023014	36	203	5.65652e-06	0.000482617	ssc:100126293,CASS4,100126293:down|ssc:100270814,-,100270814:down|ssc:397122,IL1B1,397122:down|ssc:100522873,EPHA2,100522873:down|ssc:396851,PIK3R5,396851:down|ssc:396665,-,396665:down|ssc:100153176,SFRP5,100153176:down|ssc:100152038,OSM,100152038:down|ssc:100627019,ABL2,100627019:down|ssc:733670,RGS2,733670:up|ssc:100517086,CSF1R,100517086:down|ssc:100520599,FAM58A,100520599:up|ssc:100049663,EDN…	http://amigo.geneontology.org/cgi-bin/amigo/term_details?term=GO:0023014
leukocyte degranulation	Biological Process	GO:0043299	7	11	5.73011e-06	0.000482617	ssc:100516668,RABGEF1,100516668:down|ssc:100519703,F2RL1,100519703:down|ssc:100155631,FES,100155631:down|ssc:100511161,PLA2G3,100511161:down|ssc:397406,FCER1G,397406:down|ssc:100152253,STX11,100152253:down|ssc:100524561,PPBP,100524561:down	http://amigo.geneontology.org/cgi-bin/amigo/term_details?term=GO:0043299
cell-cell adhesion	Biological Process	GO:0098609	35	195	5.7914e-06	0.000482617	ssc:396927,ZP3,396927:up|ssc:100621027,CX3CL1,100621027:down|ssc:100127489,S100A9,100127489:down|ssc:100621675,-,100621675:down|ssc:397492,DPP4,397492:down|ssc:100153191,SIT1,100153191:up|ssc:445528,HLA-DMA,445528:down|ssc:100627019,ABL2,100627019:down|ssc:100155091,ITGA5,100155091:down|ssc:100152253,STX11,100152253:down|ssc:397246,VNN1,397246:up|ssc:403163,EPCAM,403163:down|ssc:100522131,FKBP1B,…	http://amigo.geneontology.org/cgi-bin/amigo/term_details?term=GO:0098609
hematopoietic or lymphoid organ development	Biological Process	GO:0048534	38	221	6.61932e-06	0.00054373	ssc:100127155,LMO4,100127155:up|ssc:100522873,EPHA2,100522873:down|ssc:100521992,HCLS1,100521992:down|ssc:445528,HLA-DMA,445528:down|ssc:100622220,SLC25A38,100622220:up|ssc:397201,JAK2,397201:down|ssc:100627019,ABL2,100627019:down|ssc:100519098,SAMD9,100519098:down|ssc:654298,ID2,654298:down|ssc:100517086,CSF1R,100517086:down|ssc:100524095,PLD4,100524095:down|ssc:397246,VNN1,397246:up|ssc:397614,…	http://amigo.geneontology.org/cgi-bin/amigo/term_details?term=GO:0048534
single organism cell adhesion	Biological Process	GO:0098602	34	190	8.44862e-06	0.000681207	ssc:396927,ZP3,396927:up|ssc:100621027,CX3CL1,100621027:down|ssc:100127489,S100A9,100127489:down|ssc:100621675,-,100621675:down|ssc:397492,DPP4,397492:down|ssc:100153191,SIT1,100153191:up|ssc:445528,HLA-DMA,445528:down|ssc:397620,FN1,397620:down|ssc:100627019,ABL2,100627019:down|ssc:100155091,ITGA5,100155091:down|ssc:100152253,STX11,100152253:down|ssc:397246,VNN1,397246:up|ssc:403163,EPCAM,403163…	http://amigo.geneontology.org/cgi-bin/amigo/term_details?term=GO:0098602
intracellular signal transduction	Biological Process	GO:0035556	80	613	8.52989e-06	0.000681207	ssc:100270814,-,100270814:down|ssc:397122,IL1B1,397122:down|ssc:100522873,EPHA2,100522873:down|ssc:396851,PIK3R5,396851:down|ssc:100153460,AKAP5,100153460:down|ssc:100621675,-,100621675:down|ssc:396665,-,396665:down|ssc:100153176,SFRP5,100153176:down|ssc:100154195,-,100154195:down|ssc:780421,CMKLR1,780421:down|ssc:100152038,OSM,100152038:down|ssc:404772,GEM,404772:down|ssc:100514585,RAB3B,1005145…	http://amigo.geneontology.org/cgi-bin/amigo/term_details?term=GO:0035556
developmental process	Biological Process	GO:0032502	150	1348	8.75073e-06	0.00068927	ssc:100621027,CX3CL1,100621027:down|ssc:100622059,KCTD11,100622059:down|ssc:100624677,HNMT,100624677:down|ssc:100152404,HEY2,100152404:down|ssc:396665,-,396665:down|ssc:780421,CMKLR1,780421:down|ssc:100622220,SLC25A38,100622220:up|ssc:100521487,WEE1,100521487:down|ssc:100518612,MFSD2A,100518612:down|ssc:397620,FN1,397620:down|ssc:100519335,IFT57,100519335:up|ssc:100522360,-,100522360:down|ssc:100…	http://amigo.geneontology.org/cgi-bin/amigo/term_details?term=GO:0032502
protein phosphorylation	Biological Process	GO:0006468	65	468	8.9624e-06	0.000696403	ssc:100270814,-,100270814:down|ssc:100286778,PDK4,100286778:down|ssc:397122,IL1B1,397122:down|ssc:100522873,EPHA2,100522873:down|ssc:396851,PIK3R5,396851:down|ssc:396665,-,396665:down|ssc:100153176,SFRP5,100153176:down|ssc:100145894,JTB,100145894:up|ssc:100152038,OSM,100152038:down|ssc:100521487,WEE1,100521487:down|ssc:100144523,PMEPA1,100144523:down|ssc:100517086,CSF1R,100517086:down|ssc:1000496…	http://amigo.geneontology.org/cgi-bin/amigo/term_details?term=GO:0006468
regulation of cell communication	Biological Process	GO:0010646	88	695	9.68781e-06	0.000727874	ssc:100270814,-,100270814:down|ssc:397122,IL1B1,397122:down|ssc:100522873,EPHA2,100522873:down|ssc:100621027,CX3CL1,100621027:down|ssc:396851,PIK3R5,396851:down|ssc:100622059,KCTD11,100622059:down|ssc:100152404,HEY2,100152404:down|ssc:100153460,AKAP5,100153460:down|ssc:100153176,SFRP5,100153176:down|ssc:100154195,-,100154195:down|ssc:780421,CMKLR1,780421:down|ssc:100152038,OSM,100152038:down|ssc:…	http://amigo.geneontology.org/cgi-bin/amigo/term_details?term=GO:0010646
phosphorylation	Biological Process	GO:0016310	74	556	9.69415e-06	0.000727874	ssc:100270814,-,100270814:down|ssc:100286778,PDK4,100286778:down|ssc:397122,IL1B1,397122:down|ssc:100522873,EPHA2,100522873:down|ssc:396851,PIK3R5,396851:down|ssc:396665,-,396665:down|ssc:100153176,SFRP5,100153176:down|ssc:100145894,JTB,100145894:up|ssc:100152038,OSM,100152038:down|ssc:100521487,WEE1,100521487:down|ssc:100144523,PMEPA1,100144523:down|ssc:100517086,CSF1R,100517086:down|ssc:1000496…	http://amigo.geneontology.org/cgi-bin/amigo/term_details?term=GO:0016310
cytokine-mediated signaling pathway	Biological Process	GO:0019221	24	113	9.80912e-06	0.000727874	ssc:396900,AMCF-II,396900:down|ssc:414375,XCR1,414375:down|ssc:397122,IL1B1,397122:down|ssc:100621027,CX3CL1,100621027:down|ssc:100516458,TNFSF18,100516458:down|ssc:100525528,-,100525528:down|ssc:100524561,PPBP,100524561:down|ssc:100516668,RABGEF1,100516668:down|ssc:414372,CCR2,414372:down|ssc:100737352,ACKR2,100737352:down|ssc:780421,CMKLR1,780421:down|ssc:414371,CCR5,414371:down|ssc:100037292,A…	http://amigo.geneontology.org/cgi-bin/amigo/term_details?term=GO:0019221
leukocyte cell-cell adhesion	Biological Process	GO:0007159	26	128	9.87377e-06	0.000727874	ssc:100519177,GIMAP1,100519177:down|ssc:396927,ZP3,396927:up|ssc:100516458,TNFSF18,100516458:down|ssc:100127489,S100A9,100127489:down|ssc:100621675,-,100621675:down|ssc:397492,DPP4,397492:down|ssc:100153191,SIT1,100153191:up|ssc:445528,HLA-DMA,445528:down|ssc:100155958,SRF,100155958:down|ssc:100525094,SASH3,100525094:down|ssc:100516296,EGR3,100516296:down|ssc:100113425,BMP4,100113425:down|ssc:100…	http://amigo.geneontology.org/cgi-bin/amigo/term_details?term=GO:0007159
regulation of signaling	Biological Process	GO:0023051	88	696	1.02698e-05	0.000739899	ssc:100270814,-,100270814:down|ssc:397122,IL1B1,397122:down|ssc:100522873,EPHA2,100522873:down|ssc:100621027,CX3CL1,100621027:down|ssc:396851,PIK3R5,396851:down|ssc:100622059,KCTD11,100622059:down|ssc:100152404,HEY2,100152404:down|ssc:100153460,AKAP5,100153460:down|ssc:100153176,SFRP5,100153176:down|ssc:100154195,-,100154195:down|ssc:780421,CMKLR1,780421:down|ssc:100152038,OSM,100152038:down|ssc:…	http://amigo.geneontology.org/cgi-bin/amigo/term_details?term=GO:0023051
regulation of developmental process	Biological Process	GO:0050793	70	518	1.02943e-05	0.000739899	ssc:100127155,LMO4,100127155:up|ssc:100522873,EPHA2,100522873:down|ssc:100621027,CX3CL1,100621027:down|ssc:100622059,KCTD11,100622059:down|ssc:494467,CXCL14,494467:down|ssc:100152404,HEY2,100152404:down|ssc:100154607,S1PR3,100154607:down|ssc:396665,-,396665:down|ssc:100153176,SFRP5,100153176:down|ssc:780421,CMKLR1,780421:down|ssc:445528,HLA-DMA,445528:down|ssc:397620,FN1,397620:down|ssc:654298,ID…	http://amigo.geneontology.org/cgi-bin/amigo/term_details?term=GO:0050793
positive regulation of cell differentiation	Biological Process	GO:0045597	34	193	1.19972e-05	0.000851651	ssc:100622059,KCTD11,100622059:down|ssc:396628,VDR,396628:down|ssc:780421,CMKLR1,780421:down|ssc:100521992,HCLS1,100521992:down|ssc:445528,HLA-DMA,445528:down|ssc:397620,FN1,397620:down|ssc:100627019,ABL2,100627019:down|ssc:100152419,FRZB,100152419:up|ssc:654298,ID2,654298:down|ssc:100156280,GREM1,100156280:down|ssc:397246,VNN1,397246:up|ssc:397614,IL4R,397614:down|ssc:100271930,IL7R,100271930:do…	http://amigo.geneontology.org/cgi-bin/amigo/term_details?term=GO:0045597
regulation of leukocyte activation	Biological Process	GO:0002694	21	93	1.31137e-05	0.000919559	ssc:396927,ZP3,396927:up|ssc:100516458,TNFSF18,100516458:down|ssc:397492,DPP4,397492:down|ssc:100516668,RABGEF1,100516668:down|ssc:100153191,SIT1,100153191:up|ssc:445528,HLA-DMA,445528:down|ssc:100525094,SASH3,100525094:down|ssc:100516296,EGR3,100516296:down|ssc:100113425,BMP4,100113425:down|ssc:100038026,TNFSF13B,100038026:down|ssc:100155631,FES,100155631:down|ssc:654298,ID2,654298:down|ssc:1001…	http://amigo.geneontology.org/cgi-bin/amigo/term_details?term=GO:0002694
positive regulation of hemopoiesis	Biological Process	GO:1903708	14	47	1.33731e-05	0.000926448	ssc:100627693,RAB7B,100627693:down|ssc:397093,INHBA,397093:down|ssc:100155631,FES,100155631:down|ssc:654298,ID2,654298:down|ssc:414374,CCR1,414374:down|ssc:397246,VNN1,397246:up|ssc:100152462,ACVR1B,100152462:down|ssc:100521992,HCLS1,100521992:down|ssc:445528,HLA-DMA,445528:down|ssc:397614,IL4R,397614:down|ssc:399503,LIF,399503:down|ssc:100525094,SASH3,100525094:down|ssc:100516296,EGR3,100516296:…	http://amigo.geneontology.org/cgi-bin/amigo/term_details?term=GO:1903708
response to stress	Biological Process	GO:0006950	97	794	1.45892e-05	0.000998669	ssc:100519446,PLD1,100519446:down|ssc:100286778,PDK4,100286778:down|ssc:396724,OLR1,396724:down|ssc:397122,IL1B1,397122:down|ssc:100522873,EPHA2,100522873:down|ssc:100621027,CX3CL1,100621027:down|ssc:100152404,HEY2,100152404:down|ssc:397492,DPP4,397492:down|ssc:100154607,S1PR3,100154607:down|ssc:100153176,SFRP5,100153176:down|ssc:100152038,OSM,100152038:down|ssc:397620,FN1,397620:down|ssc:654298,…	http://amigo.geneontology.org/cgi-bin/amigo/term_details?term=GO:0006950
regulation of cell activation	Biological Process	GO:0050865	22	101	1.50876e-05	0.00102063	ssc:100127155,LMO4,100127155:up|ssc:396927,ZP3,396927:up|ssc:100516458,TNFSF18,100516458:down|ssc:397492,DPP4,397492:down|ssc:100516668,RABGEF1,100516668:down|ssc:100153191,SIT1,100153191:up|ssc:445528,HLA-DMA,445528:down|ssc:100525094,SASH3,100525094:down|ssc:100516296,EGR3,100516296:down|ssc:100113425,BMP4,100113425:down|ssc:100038026,TNFSF13B,100038026:down|ssc:100155631,FES,100155631:down|ssc…	http://amigo.geneontology.org/cgi-bin/amigo/term_details?term=GO:0050865
single organismal cell-cell adhesion	Biological Process	GO:0016337	32	180	1.79399e-05	0.00119947	ssc:396927,ZP3,396927:up|ssc:100621027,CX3CL1,100621027:down|ssc:100127489,S100A9,100127489:down|ssc:100621675,-,100621675:down|ssc:397492,DPP4,397492:down|ssc:100153191,SIT1,100153191:up|ssc:445528,HLA-DMA,445528:down|ssc:100627019,ABL2,100627019:down|ssc:100155091,ITGA5,100155091:down|ssc:100152253,STX11,100152253:down|ssc:397246,VNN1,397246:up|ssc:403163,EPCAM,403163:down|ssc:397614,IL4R,39761…	http://amigo.geneontology.org/cgi-bin/amigo/term_details?term=GO:0016337
leukocyte aggregation	Biological Process	GO:0070486	24	117	1.82509e-05	0.00120623	ssc:100519177,GIMAP1,100519177:down|ssc:396927,ZP3,396927:up|ssc:100516458,TNFSF18,100516458:down|ssc:100127489,S100A9,100127489:down|ssc:100621675,-,100621675:down|ssc:397492,DPP4,397492:down|ssc:100153191,SIT1,100153191:up|ssc:445528,HLA-DMA,445528:down|ssc:100155958,SRF,100155958:down|ssc:100525094,SASH3,100525094:down|ssc:100516296,EGR3,100516296:down|ssc:100113425,BMP4,100113425:down|ssc:100…	http://amigo.geneontology.org/cgi-bin/amigo/term_details?term=GO:0070486
chemokine activity	Molecular Function	GO:0008009	10	26	1.92666e-05	0.00125863	ssc:396900,AMCF-II,396900:down|ssc:100621027,CX3CL1,100621027:down|ssc:494467,CXCL14,494467:down|ssc:100525528,-,100525528:down|ssc:100302703,CCL8,100302703:down|ssc:396880,-,396880:down|ssc:100525396,-,100525396:down|ssc:100524561,PPBP,100524561:down|ssc:414904,CXCL2,414904:down|ssc:100620730,-,100620730:down	http://amigo.geneontology.org/cgi-bin/amigo/term_details?term=GO:0008009
positive regulation of developmental process	Biological Process	GO:0051094	43	275	1.96964e-05	0.00125863	ssc:396927,ZP3,396927:up|ssc:100621027,CX3CL1,100621027:down|ssc:100622059,KCTD11,100622059:down|ssc:396628,VDR,396628:down|ssc:100152404,HEY2,100152404:down|ssc:780421,CMKLR1,780421:down|ssc:100521992,HCLS1,100521992:down|ssc:445528,HLA-DMA,445528:down|ssc:397620,FN1,397620:down|ssc:100627019,ABL2,100627019:down|ssc:100518125,YBX3,100518125:up|ssc:100152419,FRZB,100152419:up|ssc:654298,ID2,65429…	http://amigo.geneontology.org/cgi-bin/amigo/term_details?term=GO:0051094
regulation of intracellular signal transduction	Biological Process	GO:1902531	54	375	1.97003e-05	0.00125863	ssc:100270814,-,100270814:down|ssc:397122,IL1B1,397122:down|ssc:396927,ZP3,396927:up|ssc:100522873,EPHA2,100522873:down|ssc:396851,PIK3R5,396851:down|ssc:100523837,PRR5L,100523837:down|ssc:100127489,S100A9,100127489:down|ssc:100153460,AKAP5,100153460:down|ssc:100153176,SFRP5,100153176:down|ssc:100154195,-,100154195:down|ssc:780421,CMKLR1,780421:down|ssc:100521992,HCLS1,100521992:down|ssc:10015203…	http://amigo.geneontology.org/cgi-bin/amigo/term_details?term=GO:1902531
immune response-regulating signaling pathway	Biological Process	GO:0002764	17	68	2.14978e-05	0.00135838	ssc:399541,TLR4,399541:down|ssc:100627693,RAB7B,100627693:down|ssc:100627308,-,100627308:down|ssc:100154350,NFKBIL1,100154350:up|ssc:100516668,RABGEF1,100516668:down|ssc:100620216,-,100620216:down|ssc:100038025,CLEC7A,100038025:down|ssc:100627864,LAT2,100627864:down|ssc:397166,MS4A2,397166:down|ssc:100517988,-,100517988:down|ssc:100134969,NFATC2,100134969:down|ssc:396969,CTSH,396969:down|ssc:1005…	http://amigo.geneontology.org/cgi-bin/amigo/term_details?term=GO:0002764
ERK1 and ERK2 cascade	Biological Process	GO:0070371	16	62	2.44611e-05	0.00152882	ssc:100270814,-,100270814:down|ssc:100522873,EPHA2,100522873:down|ssc:100515612,C5AR2,100515612:down|ssc:100153791,CYR61,100153791:down|ssc:399503,LIF,399503:down|ssc:100625570,C3orf33,100625570:up|ssc:100525894,DUSP26,100525894:down|ssc:100113425,BMP4,100113425:down|ssc:100627019,ABL2,100627019:down|ssc:100517086,CSF1R,100517086:down|ssc:396865,CHI3L1,396865:down|ssc:414374,CCR1,414374:down|ssc:…	http://amigo.geneontology.org/cgi-bin/amigo/term_details?term=GO:0070371
receptor binding	Molecular Function	GO:0005102	60	435	2.54319e-05	0.00157227	ssc:397122,IL1B1,397122:down|ssc:396951,PTHLH,396951:up|ssc:100621027,CX3CL1,100621027:down|ssc:396628,VDR,396628:down|ssc:494467,CXCL14,494467:down|ssc:100127489,S100A9,100127489:down|ssc:397492,DPP4,397492:down|ssc:100154607,S1PR3,100154607:down|ssc:100048958,GNA14,100048958:down|ssc:100524561,PPBP,100524561:down|ssc:100152038,OSM,100152038:down|ssc:100156358,S100A4,100156358:down|ssc:397620,FN…	http://amigo.geneontology.org/cgi-bin/amigo/term_details?term=GO:0005102
immune system development	Biological Process	GO:0002520	38	234	2.57032e-05	0.00157227	ssc:100127155,LMO4,100127155:up|ssc:100522873,EPHA2,100522873:down|ssc:100521992,HCLS1,100521992:down|ssc:445528,HLA-DMA,445528:down|ssc:100622220,SLC25A38,100622220:up|ssc:397201,JAK2,397201:down|ssc:100627019,ABL2,100627019:down|ssc:100519098,SAMD9,100519098:down|ssc:654298,ID2,654298:down|ssc:100517086,CSF1R,100517086:down|ssc:100524095,PLD4,100524095:down|ssc:397246,VNN1,397246:up|ssc:397614,…	http://amigo.geneontology.org/cgi-bin/amigo/term_details?term=GO:0002520
homotypic cell-cell adhesion	Biological Process	GO:0034109	26	135	2.66046e-05	0.00161028	ssc:100519177,GIMAP1,100519177:down|ssc:396927,ZP3,396927:up|ssc:100516458,TNFSF18,100516458:down|ssc:100127489,S100A9,100127489:down|ssc:100621675,-,100621675:down|ssc:397492,DPP4,397492:down|ssc:100623651,DSC2,100623651:down|ssc:100153191,SIT1,100153191:up|ssc:445528,HLA-DMA,445528:down|ssc:100155958,SRF,100155958:down|ssc:100525094,SASH3,100525094:down|ssc:100516296,EGR3,100516296:down|ssc:100…	http://amigo.geneontology.org/cgi-bin/amigo/term_details?term=GO:0034109
regulation of signal transduction	Biological Process	GO:0009966	80	634	3.01081e-05	0.00180335	ssc:100270814,-,100270814:down|ssc:397122,IL1B1,397122:down|ssc:100522873,EPHA2,100522873:down|ssc:100621027,CX3CL1,100621027:down|ssc:396851,PIK3R5,396851:down|ssc:100622059,KCTD11,100622059:down|ssc:100152404,HEY2,100152404:down|ssc:100153460,AKAP5,100153460:down|ssc:100153176,SFRP5,100153176:down|ssc:100154195,-,100154195:down|ssc:780421,CMKLR1,780421:down|ssc:100152038,OSM,100152038:down|ssc:…	http://amigo.geneontology.org/cgi-bin/amigo/term_details?term=GO:0009966
positive regulation of cell proliferation	Biological Process	GO:0008284	33	193	3.05021e-05	0.00180365	ssc:396927,ZP3,396927:up|ssc:396951,PTHLH,396951:up|ssc:100152404,HEY2,100152404:down|ssc:100621675,-,100621675:down|ssc:397492,DPP4,397492:down|ssc:396665,-,396665:down|ssc:100521992,HCLS1,100521992:down|ssc:100152038,OSM,100152038:down|ssc:100154394,ROMO1,100154394:up|ssc:654298,ID2,654298:down|ssc:100517086,CSF1R,100517086:down|ssc:100156280,GREM1,100156280:down|ssc:100049663,EDN3,100049663:up…	http://amigo.geneontology.org/cgi-bin/amigo/term_details?term=GO:0008284
regulation of localization	Biological Process	GO:0032879	65	486	3.09033e-05	0.00180365	ssc:100522873,EPHA2,100522873:down|ssc:100621675,-,100621675:down|ssc:100153176,SFRP5,100153176:down|ssc:780421,CMKLR1,780421:down|ssc:100152038,OSM,100152038:down|ssc:100517086,CSF1R,100517086:down|ssc:100049663,EDN3,100049663:up|ssc:397614,IL4R,397614:down|ssc:100155367,RAP2A,100155367:down|ssc:100158013,FITM2,100158013:down|ssc:396900,AMCF-II,396900:down|ssc:100525528,-,100525528:down|ssc:1005…	http://amigo.geneontology.org/cgi-bin/amigo/term_details?term=GO:0032879
lymphocyte aggregation	Biological Process	GO:0071593	23	113	3.10541e-05	0.00180365	ssc:100519177,GIMAP1,100519177:down|ssc:396927,ZP3,396927:up|ssc:100516458,TNFSF18,100516458:down|ssc:100621675,-,100621675:down|ssc:397492,DPP4,397492:down|ssc:100153191,SIT1,100153191:up|ssc:445528,HLA-DMA,445528:down|ssc:100155958,SRF,100155958:down|ssc:100525094,SASH3,100525094:down|ssc:100516296,EGR3,100516296:down|ssc:100113425,BMP4,100113425:down|ssc:100038026,TNFSF13B,100038026:down|ssc:1…	http://amigo.geneontology.org/cgi-bin/amigo/term_details?term=GO:0071593
single-organism developmental process	Biological Process	GO:0044767	146	1335	3.21461e-05	0.0018484	ssc:100621027,CX3CL1,100621027:down|ssc:100622059,KCTD11,100622059:down|ssc:100624677,HNMT,100624677:down|ssc:100152404,HEY2,100152404:down|ssc:396665,-,396665:down|ssc:780421,CMKLR1,780421:down|ssc:100622220,SLC25A38,100622220:up|ssc:100521487,WEE1,100521487:down|ssc:100518612,MFSD2A,100518612:down|ssc:397620,FN1,397620:down|ssc:100519335,IFT57,100519335:up|ssc:100155795,MYLIP,100155795:up|ssc:1…	http://amigo.geneontology.org/cgi-bin/amigo/term_details?term=GO:0044767
positive regulation of protein metabolic process	Biological Process	GO:0051247	47	317	3.31724e-05	0.00188853	ssc:100270814,-,100270814:down|ssc:100524615,ARID5A,100524615:down|ssc:397122,IL1B1,397122:down|ssc:396927,ZP3,396927:up|ssc:396851,PIK3R5,396851:down|ssc:100523837,PRR5L,100523837:down|ssc:100127489,S100A9,100127489:down|ssc:100145894,JTB,100145894:up|ssc:100521992,HCLS1,100521992:down|ssc:100152038,OSM,100152038:down|ssc:100627352,FAM162A,100627352:up|ssc:100155895,ARRDC4,100155895:down|ssc:397…	http://amigo.geneontology.org/cgi-bin/amigo/term_details?term=GO:0051247
myeloid cell differentiation	Biological Process	GO:0030099	21	99	3.59376e-05	0.0020259	ssc:100627693,RAB7B,100627693:down|ssc:100522873,EPHA2,100522873:down|ssc:100514999,PIR,100514999:up|ssc:100521992,HCLS1,100521992:down|ssc:399503,LIF,399503:down|ssc:100155958,SRF,100155958:down|ssc:100622220,SLC25A38,100622220:up|ssc:100113425,BMP4,100113425:down|ssc:397201,JAK2,397201:down|ssc:100156161,TSPAN2,100156161:down|ssc:397649,LTF,397649:up|ssc:397093,INHBA,397093:down|ssc:100155631,F…	http://amigo.geneontology.org/cgi-bin/amigo/term_details?term=GO:0030099
regulation of biological quality	Biological Process	GO:0065008	92	761	3.8761e-05	0.00216384	ssc:100270814,-,100270814:down|ssc:100286778,PDK4,100286778:down|ssc:396724,OLR1,396724:down|ssc:397122,IL1B1,397122:down|ssc:100152404,HEY2,100152404:down|ssc:100152038,OSM,100152038:down|ssc:100622220,SLC25A38,100622220:up|ssc:396915,EDN1,396915:down|ssc:100144470,PHEROC,100144470:down|ssc:397620,FN1,397620:down|ssc:654298,ID2,654298:down|ssc:100155795,MYLIP,100155795:up|ssc:100517086,CSF1R,100…	http://amigo.geneontology.org/cgi-bin/amigo/term_details?term=GO:0065008
chemokine receptor binding	Molecular Function	GO:0042379	10	28	4.09763e-05	0.00226552	ssc:396900,AMCF-II,396900:down|ssc:100621027,CX3CL1,100621027:down|ssc:494467,CXCL14,494467:down|ssc:100525528,-,100525528:down|ssc:100302703,CCL8,100302703:down|ssc:396880,-,396880:down|ssc:100525396,-,100525396:down|ssc:100524561,PPBP,100524561:down|ssc:414904,CXCL2,414904:down|ssc:100620730,-,100620730:down	http://amigo.geneontology.org/cgi-bin/amigo/term_details?term=GO:0042379
epithelium development	Biological Process	GO:0060429	47	321	4.58888e-05	0.00251296	ssc:100127155,LMO4,100127155:up|ssc:100522873,EPHA2,100522873:down|ssc:396951,PTHLH,396951:up|ssc:396628,VDR,396628:down|ssc:100152404,HEY2,100152404:down|ssc:100154607,S1PR3,100154607:down|ssc:100153176,SFRP5,100153176:down|ssc:100157902,DNPH1,100157902:up|ssc:100622572,-,100622572:down|ssc:100519335,IFT57,100519335:up|ssc:100627019,ABL2,100627019:down|ssc:100152419,FRZB,100152419:up|ssc:1001550…	http://amigo.geneontology.org/cgi-bin/amigo/term_details?term=GO:0060429
extracellular space	Cellular Component	GO:0005615	54	388	5.19196e-05	0.00279477	ssc:100270814,-,100270814:down|ssc:397122,IL1B1,397122:down|ssc:396927,ZP3,396927:up|ssc:100127489,S100A9,100127489:down|ssc:100153176,SFRP5,100153176:down|ssc:100524561,PPBP,100524561:down|ssc:100152038,OSM,100152038:down|ssc:396806,BSP1,396806:up|ssc:100156358,S100A4,100156358:down|ssc:397620,FN1,397620:down|ssc:100152724,SELENBP1,100152724:up|ssc:100152419,FRZB,100152419:up|ssc:100154994,SERPI…	http://amigo.geneontology.org/cgi-bin/amigo/term_details?term=GO:0005615
cellular amide metabolic process	Biological Process	GO:0043603	15	59	5.29792e-05	0.00279477	ssc:100521480,GSTK1,100521480:up|ssc:100624445,-,100624445:down|ssc:397682,-,397682:up|ssc:100153791,CYR61,100153791:down|ssc:100156882,FURIN,100156882:down|ssc:397246,VNN1,397246:up|ssc:100153442,-,100153442:down|ssc:100153094,-,100153094:up|ssc:100522018,GCLC,100522018:down|ssc:396969,CTSH,396969:down|ssc:100511536,MME,100511536:down|ssc:100518796,SGMS2,100518796:down|ssc:100153960,NR1H4,100153…	http://amigo.geneontology.org/cgi-bin/amigo/term_details?term=GO:0043603
regulation of ERK1 and ERK2 cascade	Biological Process	GO:0070372	15	59	5.29792e-05	0.00279477	ssc:100270814,-,100270814:down|ssc:100522873,EPHA2,100522873:down|ssc:396865,CHI3L1,396865:down|ssc:100517086,CSF1R,100517086:down|ssc:100515612,C5AR2,100515612:down|ssc:414374,CCR1,414374:down|ssc:100153791,CYR61,100153791:down|ssc:100519703,F2RL1,100519703:down|ssc:397094,IL1A,397094:down|ssc:399503,LIF,399503:down|ssc:100625570,C3orf33,100625570:up|ssc:100525894,DUSP26,100525894:down|ssc:10011…	http://amigo.geneontology.org/cgi-bin/amigo/term_details?term=GO:0070372
regulation of behavior	Biological Process	GO:0050795	15	59	5.29792e-05	0.00279477	ssc:396900,AMCF-II,396900:down|ssc:100127483,BMPR2,100127483:down|ssc:100525528,-,100525528:down|ssc:100621675,-,100621675:down|ssc:100515612,C5AR2,100515612:down|ssc:414374,CCR1,414374:down|ssc:396880,-,396880:down|ssc:100049663,EDN3,100049663:up|ssc:100525396,-,100525396:down|ssc:100524561,PPBP,100524561:down|ssc:414372,CCR2,414372:down|ssc:780421,CMKLR1,780421:down|ssc:100519703,F2RL1,10051970…	http://amigo.geneontology.org/cgi-bin/amigo/term_details?term=GO:0050795
cytokine activity	Molecular Function	GO:0005125	23	117	5.53489e-05	0.00289324	ssc:396900,AMCF-II,396900:down|ssc:397122,IL1B1,397122:down|ssc:100621027,CX3CL1,100621027:down|ssc:100516458,TNFSF18,100516458:down|ssc:494467,CXCL14,494467:down|ssc:100525528,-,100525528:down|ssc:100524561,PPBP,100524561:down|ssc:414904,CXCL2,414904:down|ssc:595123,NAMPT,595123:up|ssc:100152038,OSM,100152038:down|ssc:399503,LIF,399503:down|ssc:100113425,BMP4,100113425:down|ssc:100038026,TNFSF13…	http://amigo.geneontology.org/cgi-bin/amigo/term_details?term=GO:0005125
phosphorus metabolic process	Biological Process	GO:0006793	94	789	5.60772e-05	0.0029049	ssc:100270814,-,100270814:down|ssc:100286778,PDK4,100286778:down|ssc:397122,IL1B1,397122:down|ssc:100522873,EPHA2,100522873:down|ssc:396851,PIK3R5,396851:down|ssc:100153460,AKAP5,100153460:down|ssc:396665,-,396665:down|ssc:100153176,SFRP5,100153176:down|ssc:100145894,JTB,100145894:up|ssc:100152038,OSM,100152038:down|ssc:100521487,WEE1,100521487:down|ssc:100144523,PMEPA1,100144523:down|ssc:1001579…	http://amigo.geneontology.org/cgi-bin/amigo/term_details?term=GO:0006793
response to molecule of bacterial origin	Biological Process	GO:0002237	17	73	5.75326e-05	0.00295368	ssc:399541,TLR4,399541:down|ssc:396900,AMCF-II,396900:down|ssc:100525528,-,100525528:down|ssc:100154350,NFKBIL1,100154350:up|ssc:100524561,PPBP,100524561:down|ssc:100513746,NOCT,100513746:down|ssc:414371,CCR5,414371:down|ssc:100620216,-,100620216:down|ssc:100127164,PTGER2,100127164:down|ssc:397649,LTF,397649:up|ssc:100525396,-,100525396:down|ssc:396880,-,396880:down|ssc:654297,CITED1,654297:up|ss…	http://amigo.geneontology.org/cgi-bin/amigo/term_details?term=GO:0002237
cell differentiation	Biological Process	GO:0030154	100	853	5.96205e-05	0.00303379	ssc:100127155,LMO4,100127155:up|ssc:100522873,EPHA2,100522873:down|ssc:100622059,KCTD11,100622059:down|ssc:494467,CXCL14,494467:down|ssc:100152404,HEY2,100152404:down|ssc:100154607,S1PR3,100154607:down|ssc:396665,-,396665:down|ssc:780421,CMKLR1,780421:down|ssc:445528,HLA-DMA,445528:down|ssc:100622220,SLC25A38,100622220:up|ssc:100521487,WEE1,100521487:down|ssc:100157902,DNPH1,100157902:up|ssc:1005…	http://amigo.geneontology.org/cgi-bin/amigo/term_details?term=GO:0030154
regulation of myeloid leukocyte mediated immunity	Biological Process	GO:0002886	5	7	6.50284e-05	0.00327994	ssc:100516668,RABGEF1,100516668:down|ssc:396900,AMCF-II,396900:down|ssc:100519703,F2RL1,100519703:down|ssc:100155631,FES,100155631:down|ssc:397406,FCER1G,397406:down	http://amigo.geneontology.org/cgi-bin/amigo/term_details?term=GO:0002886
positive regulation of cellular protein metabolic process	Biological Process	GO:0032270	44	298	6.60387e-05	0.00330193	ssc:100270814,-,100270814:down|ssc:100524615,ARID5A,100524615:down|ssc:397122,IL1B1,397122:down|ssc:396927,ZP3,396927:up|ssc:396851,PIK3R5,396851:down|ssc:100523837,PRR5L,100523837:down|ssc:100127489,S100A9,100127489:down|ssc:100145894,JTB,100145894:up|ssc:100521992,HCLS1,100521992:down|ssc:100152038,OSM,100152038:down|ssc:100627352,FAM162A,100627352:up|ssc:100155895,ARRDC4,100155895:down|ssc:397…	http://amigo.geneontology.org/cgi-bin/amigo/term_details?term=GO:0032270
cytokine secretion	Biological Process	GO:0050663	12	41	6.73758e-05	0.00333975	ssc:399541,TLR4,399541:down|ssc:396865,CHI3L1,396865:down|ssc:100517086,CSF1R,100517086:down|ssc:100515612,C5AR2,100515612:down|ssc:100516668,RABGEF1,100516668:down|ssc:397614,IL4R,397614:down|ssc:397094,IL1A,397094:down|ssc:100519703,F2RL1,100519703:down|ssc:397106,IL10,397106:down|ssc:396623,TLR2,396623:down|ssc:100621544,RNF19B,100621544:down|ssc:100627019,ABL2,100627019:down	http://amigo.geneontology.org/cgi-bin/amigo/term_details?term=GO:0050663
regulation of hemopoiesis	Biological Process	GO:1903706	17	74	6.91629e-05	0.00339903	ssc:100627693,RAB7B,100627693:down|ssc:100521992,HCLS1,100521992:down|ssc:399503,LIF,399503:down|ssc:445528,HLA-DMA,445528:down|ssc:100525094,SASH3,100525094:down|ssc:100516296,EGR3,100516296:down|ssc:100113425,BMP4,100113425:down|ssc:397649,LTF,397649:up|ssc:397093,INHBA,397093:down|ssc:100155631,FES,100155631:down|ssc:654298,ID2,654298:down|ssc:414374,CCR1,414374:down|ssc:397246,VNN1,397246:up|…	http://amigo.geneontology.org/cgi-bin/amigo/term_details?term=GO:1903706
regulation of ossification	Biological Process	GO:0030278	14	54	7.44353e-05	0.00362715	ssc:100516027,SFRP2,100516027:down|ssc:397649,LTF,397649:up|ssc:100127483,BMPR2,100127483:down|ssc:654298,ID2,654298:down|ssc:100516663,CREB3L1,100516663:down|ssc:100038004,EGR2,100038004:down|ssc:100156280,GREM1,100156280:down|ssc:100624458,ANKH,100624458:down|ssc:414374,CCR1,414374:down|ssc:100153791,CYR61,100153791:down|ssc:654297,CITED1,654297:up|ssc:100513746,NOCT,100513746:down|ssc:10052283…	http://amigo.geneontology.org/cgi-bin/amigo/term_details?term=GO:0030278
organ development	Biological Process	GO:0048513	94	795	7.53632e-05	0.0036415	ssc:100127155,LMO4,100127155:up|ssc:100522873,EPHA2,100522873:down|ssc:494467,CXCL14,494467:down|ssc:100624677,HNMT,100624677:down|ssc:100152404,HEY2,100152404:down|ssc:396665,-,396665:down|ssc:100153176,SFRP5,100153176:down|ssc:445528,HLA-DMA,445528:down|ssc:100622220,SLC25A38,100622220:up|ssc:100519335,IFT57,100519335:up|ssc:654298,ID2,654298:down|ssc:100517086,CSF1R,100517086:down|ssc:10003800…	http://amigo.geneontology.org/cgi-bin/amigo/term_details?term=GO:0048513
regulation of multicellular organismal development	Biological Process	GO:2000026	53	384	7.67004e-05	0.00367523	ssc:396927,ZP3,396927:up|ssc:100522873,EPHA2,100522873:down|ssc:396951,PTHLH,396951:up|ssc:100621027,CX3CL1,100621027:down|ssc:100622059,KCTD11,100622059:down|ssc:396628,VDR,396628:down|ssc:100152404,HEY2,100152404:down|ssc:100154607,S1PR3,100154607:down|ssc:396665,-,396665:down|ssc:100153176,SFRP5,100153176:down|ssc:100521992,HCLS1,100521992:down|ssc:445528,HLA-DMA,445528:down|ssc:397620,FN1,397…	http://amigo.geneontology.org/cgi-bin/amigo/term_details?term=GO:2000026
T cell activation	Biological Process	GO:0042110	22	112	8.11027e-05	0.00382246	ssc:100519177,GIMAP1,100519177:down|ssc:396927,ZP3,396927:up|ssc:100516458,TNFSF18,100516458:down|ssc:397492,DPP4,397492:down|ssc:100153191,SIT1,100153191:up|ssc:445528,HLA-DMA,445528:down|ssc:100155958,SRF,100155958:down|ssc:100525094,SASH3,100525094:down|ssc:100516296,EGR3,100516296:down|ssc:100113425,BMP4,100113425:down|ssc:100038026,TNFSF13B,100038026:down|ssc:100627019,ABL2,100627019:down|ss…	http://amigo.geneontology.org/cgi-bin/amigo/term_details?term=GO:0042110
T cell aggregation	Biological Process	GO:0070489	22	112	8.11027e-05	0.00382246	ssc:100519177,GIMAP1,100519177:down|ssc:396927,ZP3,396927:up|ssc:100516458,TNFSF18,100516458:down|ssc:397492,DPP4,397492:down|ssc:100153191,SIT1,100153191:up|ssc:445528,HLA-DMA,445528:down|ssc:100155958,SRF,100155958:down|ssc:100525094,SASH3,100525094:down|ssc:100516296,EGR3,100516296:down|ssc:100113425,BMP4,100113425:down|ssc:100038026,TNFSF13B,100038026:down|ssc:100627019,ABL2,100627019:down|ss…	http://amigo.geneontology.org/cgi-bin/amigo/term_details?term=GO:0070489
regulation of protein phosphorylation	Biological Process	GO:0001932	45	310	8.26883e-05	0.00383185	ssc:100270814,-,100270814:down|ssc:397122,IL1B1,397122:down|ssc:396927,ZP3,396927:up|ssc:100522873,EPHA2,100522873:down|ssc:396851,PIK3R5,396851:down|ssc:100523837,PRR5L,100523837:down|ssc:100153176,SFRP5,100153176:down|ssc:100145894,JTB,100145894:up|ssc:100521992,HCLS1,100521992:down|ssc:100152038,OSM,100152038:down|ssc:100144523,PMEPA1,100144523:down|ssc:397201,JAK2,397201:down|ssc:100627019,AB…	http://amigo.geneontology.org/cgi-bin/amigo/term_details?term=GO:0001932
secretion by cell	Biological Process	GO:0032940	32	194	8.28195e-05	0.00383185	ssc:399541,TLR4,399541:down|ssc:396927,ZP3,396927:up|ssc:100524561,PPBP,100524561:down|ssc:100152038,OSM,100152038:down|ssc:100627019,ABL2,100627019:down|ssc:100517086,CSF1R,100517086:down|ssc:100152253,STX11,100152253:down|ssc:100049663,EDN3,100049663:up|ssc:100156882,FURIN,100156882:down|ssc:397614,IL4R,397614:down|ssc:397094,IL1A,397094:down|ssc:100522131,FKBP1B,100522131:down|ssc:100518141,C2…	http://amigo.geneontology.org/cgi-bin/amigo/term_details?term=GO:0032940
leukocyte differentiation	Biological Process	GO:0002521	23	120	8.35383e-05	0.00383185	ssc:100519177,GIMAP1,100519177:down|ssc:100522873,EPHA2,100522873:down|ssc:100514999,PIR,100514999:up|ssc:100521992,HCLS1,100521992:down|ssc:399503,LIF,399503:down|ssc:445528,HLA-DMA,445528:down|ssc:100155958,SRF,100155958:down|ssc:100525094,SASH3,100525094:down|ssc:100516296,EGR3,100516296:down|ssc:100113425,BMP4,100113425:down|ssc:100156161,TSPAN2,100156161:down|ssc:100627019,ABL2,100627019:dow…	http://amigo.geneontology.org/cgi-bin/amigo/term_details?term=GO:0002521
ossification	Biological Process	GO:0001503	20	97	8.39675e-05	0.00383185	ssc:100522873,EPHA2,100522873:down|ssc:396951,PTHLH,396951:up|ssc:100127483,BMPR2,100127483:down|ssc:100153791,CYR61,100153791:down|ssc:100152247,TP53INP2,100152247:down|ssc:100513746,NOCT,100513746:down|ssc:100113425,BMP4,100113425:down|ssc:100516027,SFRP2,100516027:down|ssc:397649,LTF,397649:up|ssc:397137,IBSP,397137:down|ssc:100620511,CLEC3B,100620511:up|ssc:654298,ID2,654298:down|ssc:10015628…	http://amigo.geneontology.org/cgi-bin/amigo/term_details?term=GO:0001503
cellular developmental process	Biological Process	GO:0048869	105	914	8.71048e-05	0.00394372	ssc:100127155,LMO4,100127155:up|ssc:100522873,EPHA2,100522873:down|ssc:100622059,KCTD11,100622059:down|ssc:494467,CXCL14,494467:down|ssc:100152404,HEY2,100152404:down|ssc:100154607,S1PR3,100154607:down|ssc:396665,-,396665:down|ssc:780421,CMKLR1,780421:down|ssc:445528,HLA-DMA,445528:down|ssc:100622220,SLC25A38,100622220:up|ssc:100521487,WEE1,100521487:down|ssc:100157902,DNPH1,100157902:up|ssc:1005…	http://amigo.geneontology.org/cgi-bin/amigo/term_details?term=GO:0048869
immune response-activating signal transduction	Biological Process	GO:0002757	15	62	9.82284e-05	0.00441261	ssc:399541,TLR4,399541:down|ssc:100627693,RAB7B,100627693:down|ssc:100038025,CLEC7A,100038025:down|ssc:100627864,LAT2,100627864:down|ssc:100627308,-,100627308:down|ssc:100517988,-,100517988:down|ssc:100154350,NFKBIL1,100154350:up|ssc:100134969,NFATC2,100134969:down|ssc:100516668,RABGEF1,100516668:down|ssc:100519703,F2RL1,100519703:down|ssc:100620216,-,100620216:down|ssc:397406,FCER1G,397406:down|…	http://amigo.geneontology.org/cgi-bin/amigo/term_details?term=GO:0002757
phosphate-containing compound metabolic process	Biological Process	GO:0006796	92	780	0.000100286	0.00447012	ssc:100270814,-,100270814:down|ssc:100286778,PDK4,100286778:down|ssc:397122,IL1B1,397122:down|ssc:100522873,EPHA2,100522873:down|ssc:396851,PIK3R5,396851:down|ssc:100153460,AKAP5,100153460:down|ssc:396665,-,396665:down|ssc:100153176,SFRP5,100153176:down|ssc:100145894,JTB,100145894:up|ssc:100152038,OSM,100152038:down|ssc:100521487,WEE1,100521487:down|ssc:100144523,PMEPA1,100144523:down|ssc:1001579…	http://amigo.geneontology.org/cgi-bin/amigo/term_details?term=GO:0006796
tissue development	Biological Process	GO:0009888	64	495	0.000101208	0.00447653	ssc:100127155,LMO4,100127155:up|ssc:100522873,EPHA2,100522873:down|ssc:100152404,HEY2,100152404:down|ssc:100154607,S1PR3,100154607:down|ssc:396665,-,396665:down|ssc:100153176,SFRP5,100153176:down|ssc:100157902,DNPH1,100157902:up|ssc:397620,FN1,397620:down|ssc:100519335,IFT57,100519335:up|ssc:100522360,-,100522360:down|ssc:654298,ID2,654298:down|ssc:100038004,EGR2,100038004:down|ssc:100624458,ANKH…	http://amigo.geneontology.org/cgi-bin/amigo/term_details?term=GO:0009888
side of membrane	Cellular Component	GO:0098552	19	91	0.000105425	0.00457999	ssc:100627308,-,100627308:down|ssc:100048958,GNA14,100048958:down|ssc:414371,CCR5,414371:down|ssc:100627019,ABL2,100627019:down|ssc:397063,ITGB3,397063:down|ssc:404772,GEM,404772:down|ssc:100155091,ITGA5,100155091:down|ssc:100155631,FES,100155631:down|ssc:397166,MS4A2,397166:down|ssc:733670,RGS2,733670:up|ssc:396853,-,396853:up|ssc:100517988,-,100517988:down|ssc:414374,CCR1,414374:down|ssc:100127…	http://amigo.geneontology.org/cgi-bin/amigo/term_details?term=GO:0098552
cytokine production	Biological Process	GO:0001816	26	146	0.000106603	0.00457999	ssc:399541,TLR4,399541:down|ssc:100627693,RAB7B,100627693:down|ssc:396900,AMCF-II,396900:down|ssc:396927,ZP3,396927:up|ssc:100621027,CX3CL1,100621027:down|ssc:100154607,S1PR3,100154607:down|ssc:100515612,C5AR2,100515612:down|ssc:100154350,NFKBIL1,100154350:up|ssc:100516668,RABGEF1,100516668:down|ssc:780421,CMKLR1,780421:down|ssc:100525094,SASH3,100525094:down|ssc:100620216,-,100620216:down|ssc:10…	http://amigo.geneontology.org/cgi-bin/amigo/term_details?term=GO:0001816
lymphocyte activation	Biological Process	GO:0046649	26	146	0.000106603	0.00457999	ssc:100519177,GIMAP1,100519177:down|ssc:396927,ZP3,396927:up|ssc:100516458,TNFSF18,100516458:down|ssc:397492,DPP4,397492:down|ssc:100153191,SIT1,100153191:up|ssc:445528,HLA-DMA,445528:down|ssc:100155958,SRF,100155958:down|ssc:100525094,SASH3,100525094:down|ssc:100516296,EGR3,100516296:down|ssc:100113425,BMP4,100113425:down|ssc:100038026,TNFSF13B,100038026:down|ssc:100627019,ABL2,100627019:down|ss…	http://amigo.geneontology.org/cgi-bin/amigo/term_details?term=GO:0046649
membrane-bounded vesicle	Cellular Component	GO:0031988	104	908	0.000107293	0.00457999	ssc:497237,SCG2,497237:down|ssc:100739619,NDUFB1,100739619:up|ssc:100624677,HNMT,100624677:down|ssc:100621675,-,100621675:down|ssc:397492,DPP4,397492:down|ssc:100519675,RPL35A,100519675:up|ssc:445528,HLA-DMA,445528:down|ssc:100524550,VPS37D,100524550:up|ssc:100157902,DNPH1,100157902:up|ssc:100627480,TFF3,100627480:up|ssc:397620,FN1,397620:down|ssc:100270722,ARF5,100270722:up|ssc:100522360,-,10052…	http://amigo.geneontology.org/cgi-bin/amigo/term_details?term=GO:0031988
positive regulation of protein phosphorylation	Biological Process	GO:0001934	31	188	0.00010753	0.00457999	ssc:100270814,-,100270814:down|ssc:397122,IL1B1,397122:down|ssc:396927,ZP3,396927:up|ssc:396851,PIK3R5,396851:down|ssc:100523837,PRR5L,100523837:down|ssc:100127483,BMPR2,100127483:down|ssc:100515612,C5AR2,100515612:down|ssc:397495,BDNF,397495:down|ssc:100145894,JTB,100145894:up|ssc:100153791,CYR61,100153791:down|ssc:100521992,HCLS1,100521992:down|ssc:100152038,OSM,100152038:down|ssc:399503,LIF,39…	http://amigo.geneontology.org/cgi-bin/amigo/term_details?term=GO:0001934
system development	Biological Process	GO:0048731	113	1006	0.000115308	0.00485285	ssc:100127155,LMO4,100127155:up|ssc:100621457,-,100621457:down|ssc:100522873,EPHA2,100522873:down|ssc:100621027,CX3CL1,100621027:down|ssc:100622059,KCTD11,100622059:down|ssc:494467,CXCL14,494467:down|ssc:100624677,HNMT,100624677:down|ssc:100152404,HEY2,100152404:down|ssc:396665,-,396665:down|ssc:100153176,SFRP5,100153176:down|ssc:100152038,OSM,100152038:down|ssc:445528,HLA-DMA,445528:down|ssc:100…	http://amigo.geneontology.org/cgi-bin/amigo/term_details?term=GO:0048731
vesicle	Cellular Component	GO:0031982	106	931	0.000115624	0.00485285	ssc:497237,SCG2,497237:down|ssc:100739619,NDUFB1,100739619:up|ssc:100624677,HNMT,100624677:down|ssc:100621675,-,100621675:down|ssc:397492,DPP4,397492:down|ssc:100519675,RPL35A,100519675:up|ssc:445528,HLA-DMA,445528:down|ssc:100524550,VPS37D,100524550:up|ssc:100157902,DNPH1,100157902:up|ssc:100627480,TFF3,100627480:up|ssc:397620,FN1,397620:down|ssc:100270722,ARF5,100270722:up|ssc:100522360,-,10052…	http://amigo.geneontology.org/cgi-bin/amigo/term_details?term=GO:0031982
enzyme linked receptor protein signaling pathway	Biological Process	GO:0007167	34	215	0.000118327	0.00489864	ssc:100286778,PDK4,100286778:down|ssc:100522873,EPHA2,100522873:down|ssc:100627308,-,100627308:down|ssc:396665,-,396665:down|ssc:100144523,PMEPA1,100144523:down|ssc:397201,JAK2,397201:down|ssc:100627019,ABL2,100627019:down|ssc:100517086,CSF1R,100517086:down|ssc:100156280,GREM1,100156280:down|ssc:100517990,ZCCHC12,100517990:down|ssc:100519275,CSRNP1,100519275:down|ssc:100512012,WFIKKN2,100512012:u…	http://amigo.geneontology.org/cgi-bin/amigo/term_details?term=GO:0007167
leukocyte mediated immunity	Biological Process	GO:0002443	15	63	0.000119436	0.00489864	ssc:396900,AMCF-II,396900:down|ssc:396927,ZP3,396927:up|ssc:100155631,FES,100155631:down|ssc:100511161,PLA2G3,100511161:down|ssc:100522387,CTSC,100522387:up|ssc:100152253,STX11,100152253:down|ssc:100524561,PPBP,100524561:down|ssc:100516668,RABGEF1,100516668:down|ssc:100519703,F2RL1,100519703:down|ssc:445528,HLA-DMA,445528:down|ssc:396969,CTSH,396969:down|ssc:100525094,SASH3,100525094:down|ssc:100…	http://amigo.geneontology.org/cgi-bin/amigo/term_details?term=GO:0002443
regulation of MAPK cascade	Biological Process	GO:0043408	29	172	0.000119566	0.00489864	ssc:100270814,-,100270814:down|ssc:397122,IL1B1,397122:down|ssc:100522873,EPHA2,100522873:down|ssc:396851,PIK3R5,396851:down|ssc:100515612,C5AR2,100515612:down|ssc:100153176,SFRP5,100153176:down|ssc:100153791,CYR61,100153791:down|ssc:100152038,OSM,100152038:down|ssc:399503,LIF,399503:down|ssc:100625570,C3orf33,100625570:up|ssc:100525894,DUSP26,100525894:down|ssc:100113425,BMP4,100113425:down|ssc:…	http://amigo.geneontology.org/cgi-bin/amigo/term_details?term=GO:0043408
response to lipopolysaccharide	Biological Process	GO:0032496	16	70	0.000120123	0.00489864	ssc:399541,TLR4,399541:down|ssc:396900,AMCF-II,396900:down|ssc:100525528,-,100525528:down|ssc:100154350,NFKBIL1,100154350:up|ssc:100524561,PPBP,100524561:down|ssc:100513746,NOCT,100513746:down|ssc:414371,CCR5,414371:down|ssc:100620216,-,100620216:down|ssc:100127164,PTGER2,100127164:down|ssc:397649,LTF,397649:up|ssc:100525396,-,100525396:down|ssc:396880,-,396880:down|ssc:654297,CITED1,654297:up|ss…	http://amigo.geneontology.org/cgi-bin/amigo/term_details?term=GO:0032496
anatomical structure development	Biological Process	GO:0048856	134	1237	0.000125363	0.00507631	ssc:100621027,CX3CL1,100621027:down|ssc:100622059,KCTD11,100622059:down|ssc:100624677,HNMT,100624677:down|ssc:100152404,HEY2,100152404:down|ssc:396665,-,396665:down|ssc:100622220,SLC25A38,100622220:up|ssc:100521487,WEE1,100521487:down|ssc:100518612,MFSD2A,100518612:down|ssc:397620,FN1,397620:down|ssc:100519335,IFT57,100519335:up|ssc:100522360,-,100522360:down|ssc:100155795,MYLIP,100155795:up|ssc:…	http://amigo.geneontology.org/cgi-bin/amigo/term_details?term=GO:0048856
positive regulation of metabolic process	Biological Process	GO:0009893	91	775	0.000130277	0.00523843	ssc:100270814,-,100270814:down|ssc:100127155,LMO4,100127155:up|ssc:396724,OLR1,396724:down|ssc:397122,IL1B1,397122:down|ssc:396851,PIK3R5,396851:down|ssc:100152404,HEY2,100152404:down|ssc:100153460,AKAP5,100153460:down|ssc:396665,-,396665:down|ssc:100145894,JTB,100145894:up|ssc:100154195,-,100154195:down|ssc:100152038,OSM,100152038:down|ssc:100155895,ARRDC4,100155895:down|ssc:397620,FN1,397620:do…	http://amigo.geneontology.org/cgi-bin/amigo/term_details?term=GO:0009893
regulation of immune response	Biological Process	GO:0050776	25	140	0.000137872	0.00547849	ssc:399541,TLR4,399541:down|ssc:100627693,RAB7B,100627693:down|ssc:396927,ZP3,396927:up|ssc:100627308,-,100627308:down|ssc:100154350,NFKBIL1,100154350:up|ssc:100516668,RABGEF1,100516668:down|ssc:445528,HLA-DMA,445528:down|ssc:100525094,SASH3,100525094:down|ssc:100620216,-,100620216:down|ssc:100038026,TNFSF13B,100038026:down|ssc:100038025,CLEC7A,100038025:down|ssc:100627864,LAT2,100627864:down|ssc…	http://amigo.geneontology.org/cgi-bin/amigo/term_details?term=GO:0050776
regulated secretory pathway	Biological Process	GO:0045055	7	16	0.000138153	0.00547849	ssc:100516668,RABGEF1,100516668:down|ssc:100519703,F2RL1,100519703:down|ssc:100155631,FES,100155631:down|ssc:100511161,PLA2G3,100511161:down|ssc:397406,FCER1G,397406:down|ssc:100152253,STX11,100152253:down|ssc:100524561,PPBP,100524561:down	http://amigo.geneontology.org/cgi-bin/amigo/term_details?term=GO:0045055
MAPK cascade	Biological Process	GO:0000165	31	191	0.000145238	0.00571999	ssc:100270814,-,100270814:down|ssc:397122,IL1B1,397122:down|ssc:100522873,EPHA2,100522873:down|ssc:396851,PIK3R5,396851:down|ssc:100515612,C5AR2,100515612:down|ssc:100153176,SFRP5,100153176:down|ssc:100153791,CYR61,100153791:down|ssc:100152038,OSM,100152038:down|ssc:399503,LIF,399503:down|ssc:414371,CCR5,414371:down|ssc:100625570,C3orf33,100625570:up|ssc:100525894,DUSP26,100525894:down|ssc:100113…	http://amigo.geneontology.org/cgi-bin/amigo/term_details?term=GO:0000165
negative regulation of cell communication	Biological Process	GO:0010648	40	272	0.000155825	0.00609521	ssc:100522873,EPHA2,100522873:down|ssc:100621027,CX3CL1,100621027:down|ssc:100622059,KCTD11,100622059:down|ssc:100152404,HEY2,100152404:down|ssc:100153176,SFRP5,100153176:down|ssc:100152038,OSM,100152038:down|ssc:100144523,PMEPA1,100144523:down|ssc:100627019,ABL2,100627019:down|ssc:100518125,YBX3,100518125:up|ssc:100152419,FRZB,100152419:up|ssc:100525762,DDIT4L,100525762:down|ssc:733670,RGS2,7336…	http://amigo.geneontology.org/cgi-bin/amigo/term_details?term=GO:0010648
negative regulation of signaling	Biological Process	GO:0023057	40	273	0.000168867	0.00653193	ssc:100522873,EPHA2,100522873:down|ssc:100621027,CX3CL1,100621027:down|ssc:100622059,KCTD11,100622059:down|ssc:100152404,HEY2,100152404:down|ssc:100153176,SFRP5,100153176:down|ssc:100152038,OSM,100152038:down|ssc:100144523,PMEPA1,100144523:down|ssc:100627019,ABL2,100627019:down|ssc:100518125,YBX3,100518125:up|ssc:100152419,FRZB,100152419:up|ssc:100525762,DDIT4L,100525762:down|ssc:733670,RGS2,7336…	http://amigo.geneontology.org/cgi-bin/amigo/term_details?term=GO:0023057
regulation of phosphorus metabolic process	Biological Process	GO:0051174	52	386	0.000169262	0.00653193	ssc:100270814,-,100270814:down|ssc:100286778,PDK4,100286778:down|ssc:397122,IL1B1,397122:down|ssc:396927,ZP3,396927:up|ssc:100522873,EPHA2,100522873:down|ssc:396951,PTHLH,396951:up|ssc:396851,PIK3R5,396851:down|ssc:100523837,PRR5L,100523837:down|ssc:100153460,AKAP5,100153460:down|ssc:100153176,SFRP5,100153176:down|ssc:100145894,JTB,100145894:up|ssc:100514958,SLAMF8,100514958:down|ssc:100521992,HC…	http://amigo.geneontology.org/cgi-bin/amigo/term_details?term=GO:0051174
CXCR chemokine receptor binding	Molecular Function	GO:0045236	6	12	0.000173315	0.00664375	ssc:396900,AMCF-II,396900:down|ssc:100525528,-,100525528:down|ssc:100620730,-,100620730:down|ssc:396880,-,396880:down|ssc:100525396,-,100525396:down|ssc:100524561,PPBP,100524561:down	http://amigo.geneontology.org/cgi-bin/amigo/term_details?term=GO:0045236
behavior	Biological Process	GO:0007610	29	176	0.000181182	0.0068993	ssc:396900,AMCF-II,396900:down|ssc:100127483,BMPR2,100127483:down|ssc:100525528,-,100525528:down|ssc:100623510,S100B,100623510:up|ssc:100621675,-,100621675:down|ssc:100515612,C5AR2,100515612:down|ssc:397495,BDNF,397495:down|ssc:100524561,PPBP,100524561:down|ssc:414372,CCR2,414372:down|ssc:780421,CMKLR1,780421:down|ssc:100152038,OSM,100152038:down|ssc:100155958,SRF,100155958:down|ssc:397547,NPY1R,…	http://amigo.geneontology.org/cgi-bin/amigo/term_details?term=GO:0007610
positive regulation of multicellular organismal process	Biological Process	GO:0051240	45	321	0.000189904	0.00718389	ssc:396927,ZP3,396927:up|ssc:100621027,CX3CL1,100621027:down|ssc:100622059,KCTD11,100622059:down|ssc:396628,VDR,396628:down|ssc:100152404,HEY2,100152404:down|ssc:100521992,HCLS1,100521992:down|ssc:445528,HLA-DMA,445528:down|ssc:100620216,-,100620216:down|ssc:397620,FN1,397620:down|ssc:100627019,ABL2,100627019:down|ssc:100518125,YBX3,100518125:up|ssc:654298,ID2,654298:down|ssc:733670,RGS2,733670:u…	http://amigo.geneontology.org/cgi-bin/amigo/term_details?term=GO:0051240
steroid biosynthetic process	Biological Process	GO:0006694	11	39	0.000195471	0.00734612	ssc:100312968,EBP,100312968:up|ssc:100147712,HSD17B1,100147712:down|ssc:494015,SCAP,494015:up|ssc:396628,VDR,396628:down|ssc:100169702,PROX1,100169702:down|ssc:397497,FGF1,397497:down|ssc:100153960,NR1H4,100153960:up|ssc:100152963,PEX2,100152963:up|ssc:403330,CYP17A1,403330:down|ssc:100144446,HMGCR,100144446:up|ssc:397680,NR0B1,397680:up	http://amigo.geneontology.org/cgi-bin/amigo/term_details?term=GO:0006694
ameboidal-type cell migration	Biological Process	GO:0001667	16	73	0.000202912	0.00742784	ssc:100522873,EPHA2,100522873:down|ssc:100523837,PRR5L,100523837:down|ssc:100127483,BMPR2,100127483:down|ssc:397492,DPP4,397492:down|ssc:100511141,VASH1,100511141:down|ssc:397564,HBEGF,397564:down|ssc:100622249,ARID5B,100622249:down|ssc:100155958,SRF,100155958:down|ssc:100516296,EGR3,100516296:down|ssc:100113425,BMP4,100113425:down|ssc:100169702,PROX1,100169702:down|ssc:100156280,GREM1,100156280:…	http://amigo.geneontology.org/cgi-bin/amigo/term_details?term=GO:0001667
regulation of anatomical structure morphogenesis	Biological Process	GO:0022603	34	221	0.00020447	0.00742784	ssc:100522873,EPHA2,100522873:down|ssc:100621027,CX3CL1,100621027:down|ssc:396628,VDR,396628:down|ssc:100152404,HEY2,100152404:down|ssc:396665,-,396665:down|ssc:100153176,SFRP5,100153176:down|ssc:397620,FN1,397620:down|ssc:654413,PALMD,654413:down|ssc:100627019,ABL2,100627019:down|ssc:100520585,FMNL1,100520585:down|ssc:100517086,CSF1R,100517086:down|ssc:100156280,GREM1,100156280:down|ssc:10015599…	http://amigo.geneontology.org/cgi-bin/amigo/term_details?term=GO:0022603
regulation of Wnt signaling pathway, planar cell polarity pathway	Biological Process	GO:2000095	4	5	0.000205396	0.00742784	ssc:100516027,SFRP2,100516027:down|ssc:100519746,DAB2,100519746:down|ssc:100627019,ABL2,100627019:down|ssc:100153176,SFRP5,100153176:down	http://amigo.geneontology.org/cgi-bin/amigo/term_details?term=GO:2000095
neutrophil activation involved in immune response	Biological Process	GO:0002283	4	5	0.000205396	0.00742784	ssc:397405,TYROBP,397405:down|ssc:397406,FCER1G,397406:down|ssc:100152253,STX11,100152253:down|ssc:100524561,PPBP,100524561:down	http://amigo.geneontology.org/cgi-bin/amigo/term_details?term=GO:0002283
[truncated: 5,593 more rows]

## Sheet: Table S4
#Term	Database	ID	the number of target gene candidates in differential expression genes(1700)	the number of target gene candidates in all background genes(16305)	P-Value	Corrected_P-Value	Input_gene	Pathway_highlink
[truncated: 239 more rows]
