# Supplementary material for: Identification of Differentially Expressed Genes in Porcine Ovaries at Proestrus and Estrus Stages Using RNA-Seq Technique
Source: Biomed Res Int. 2018 Feb 14;2018:9150723. doi: 10.1155/2018/9150723 (PMC5832140; doi:10.1155/2018/9150723)
Supplement: Supplementary Materials — Table S1: primer sequences for the genes selected for qRT-PCR. Table S2: DEGs identified under certain filter criteria. Table S3: GO enrichment analysis of DEGs. Table S4: KEGG pathway analysis of DEGs. [file 9150723.f1.zip › 9150723.f1/Table S1_BMRI_2153133.xls]

## Sheet: primer sequences
Gene name	primer sequence(5'-3')
CCR1-F	GGTGCTGCCTCTATTGGT
CCR1-R	CTGCTCTGCCTACACTGAT
HIF1A-F	CTCCAATGCCAGAACCTC
HIF1A-R	TGACTCAAAGCGACAGATA
EPCAM-F	GTCTACAGGCTGGTATTATTG
EPCAM-R	TCGCCCATCTCCTTTATC
SGK1-F	GCTGCTGAAATAGCCAGTG
SGK1-R	CAGAGTCCAAAGTCGGTAAG
INHBA-F	GGCGATGACACCGTGAAG
INHBA-R	TTACGACCTGGGTTACTGG
BSP1-F	TGGGCTGGCGTATCTGTA
BSP1-R	CTGGCATAGTCTGTGCTTCT
GAS6-F	TGGAGGTCAACGGCAAGG
GAS6-R	CGGGCAGCACTGAGGTTAG
YBX3-F	CTTGGCACTGTCAAATGGTTC
YBX3-R	CTTCTTGATGGCAGTCTGATGTA
MGMT-F	AGCAATCCTGTGCCCATCCTC
MGMT-R	GCCAGAAGCCACTCCTTGACG
ZP3-F	CAAAGCCACCCACCGTAA
ZP3-R	GCAGCCCAACCTCAAACC
RPL32-F	CGGAAGTTTCTGGTACACAATGTAA
RPL32-R	TGGAAGAGACGTTGTGAGCAA
F: fordward primer R: reverse primer
