# Supplementary material for: Identification of Differentially Expressed Genes in Porcine Ovaries at Proestrus and Estrus Stages Using RNA-Seq Technique
Source: Biomed Res Int. 2018 Feb 14;2018:9150723. doi: 10.1155/2018/9150723 (PMC5832140; doi:10.1155/2018/9150723)
Supplement: Supplementary Materials — Table S1: primer sequences for the genes selected for qRT-PCR. Table S2: DEGs identified under certain filter criteria. Table S3: GO enrichment analysis of DEGs. Table S4: KEGG pathway analysis of DEGs. [file 9150723.f1.zip › 9150723.f1/Table S3_BMRI_2153135.xlsx]

## Sheet: Sheet1
#Term	Namespace	ID	the number of target gene candidates in differential expression genes(508)	the number of target gene candidates in all background genes(6223)	P-Value	Corrected_P-Value	Input_gene	Pathway_highlink
immune system process	Biological Process	GO:0002376	101	597	1.11448e-13	6.40826e-10	ssc:100127155,LMO4,100127155:up|ssc:396724,OLR1,396724:down|ssc:397122,IL1B1,397122:down|ssc:100522873,EPHA2,100522873:down|ssc:100621027,CX3CL1,100621027:down|ssc:494467,CXCL14,494467:down|ssc:100621675,-,100621675:down|ssc:397492,DPP4,397492:down|ssc:780421,CMKLR1,780421:down|ssc:100152038,OSM,100152038:down|ssc:445528,HLA-DMA,445528:down|ssc:100622220,SLC25A38,100622220:up|ssc:100037921,SLA-DQ…	http://amigo.geneontology.org/cgi-bin/amigo/term_details?term=GO:0002376
immune response	Biological Process	GO:0006955	65	320	1.42375e-12	4.09329e-09	ssc:397122,IL1B1,397122:down|ssc:100621027,CX3CL1,100621027:down|ssc:494467,CXCL14,494467:down|ssc:100152038,OSM,100152038:down|ssc:445528,HLA-DMA,445528:down|ssc:100037921,SLA-DQB1,100037921:down|ssc:404704,CD4,404704:down|ssc:397614,IL4R,397614:down|ssc:100271930,IL7R,100271930:down|ssc:100621544,RNF19B,100621544:down|ssc:100627693,RAB7B,100627693:down|ssc:396900,AMCF-II,396900:down|ssc:1005164…	http://amigo.geneontology.org/cgi-bin/amigo/term_details?term=GO:0006955
positive regulation of cell migration	Biological Process	GO:0030335	26	78	1.70082e-10	2.95975e-07	ssc:396900,AMCF-II,396900:down|ssc:396927,ZP3,396927:up|ssc:100127483,BMPR2,100127483:down|ssc:100525528,-,100525528:down|ssc:100621675,-,100621675:down|ssc:100524561,PPBP,100524561:down|ssc:397564,HBEGF,397564:down|ssc:100153791,CYR61,100153791:down|ssc:414372,CCR2,414372:down|ssc:780421,CMKLR1,780421:down|ssc:100113425,BMP4,100113425:down|ssc:100169702,PROX1,100169702:down|ssc:397497,FGF1,39749…	http://amigo.geneontology.org/cgi-bin/amigo/term_details?term=GO:0030335
biological adhesion	Biological Process	GO:0022610	58	300	2.07739e-10	2.95975e-07	ssc:100627882,CYTIP,100627882:down|ssc:100126293,CASS4,100126293:down|ssc:396724,OLR1,396724:down|ssc:396927,ZP3,396927:up|ssc:100522873,EPHA2,100522873:down|ssc:100621027,CX3CL1,100621027:down|ssc:100127489,S100A9,100127489:down|ssc:100621675,-,100621675:down|ssc:397492,DPP4,397492:down|ssc:100153191,SIT1,100153191:up|ssc:445528,HLA-DMA,445528:down|ssc:397620,FN1,397620:down|ssc:100627019,ABL2,1…	http://amigo.geneontology.org/cgi-bin/amigo/term_details?term=GO:0022610
cell migration	Biological Process	GO:0016477	55	278	2.57369e-10	2.95975e-07	ssc:396927,ZP3,396927:up|ssc:100522873,EPHA2,100522873:down|ssc:100621027,CX3CL1,100621027:down|ssc:100523837,PRR5L,100523837:down|ssc:494467,CXCL14,494467:down|ssc:100127489,S100A9,100127489:down|ssc:100621675,-,100621675:down|ssc:397492,DPP4,397492:down|ssc:100524561,PPBP,100524561:down|ssc:780421,CMKLR1,780421:down|ssc:100620216,-,100620216:down|ssc:100627019,ABL2,100627019:down|ssc:100520585,…	http://amigo.geneontology.org/cgi-bin/amigo/term_details?term=GO:0016477
cell chemotaxis	Biological Process	GO:0060326	25	75	3.85048e-10	3.34041e-07	ssc:396900,AMCF-II,396900:down|ssc:100522873,EPHA2,100522873:down|ssc:100621027,CX3CL1,100621027:down|ssc:494467,CXCL14,494467:down|ssc:100127489,S100A9,100127489:down|ssc:100525528,-,100525528:down|ssc:100621675,-,100621675:down|ssc:100515612,C5AR2,100515612:down|ssc:100524561,PPBP,100524561:down|ssc:414904,CXCL2,414904:down|ssc:414372,CCR2,414372:down|ssc:780421,CMKLR1,780421:down|ssc:100516296…	http://amigo.geneontology.org/cgi-bin/amigo/term_details?term=GO:0060326
cell adhesion	Biological Process	GO:0007155	57	297	4.06659e-10	3.34041e-07	ssc:100627882,CYTIP,100627882:down|ssc:100126293,CASS4,100126293:down|ssc:396724,OLR1,396724:down|ssc:396927,ZP3,396927:up|ssc:100522873,EPHA2,100522873:down|ssc:100621027,CX3CL1,100621027:down|ssc:100127489,S100A9,100127489:down|ssc:100621675,-,100621675:down|ssc:397492,DPP4,397492:down|ssc:100153191,SIT1,100153191:up|ssc:445528,HLA-DMA,445528:down|ssc:397620,FN1,397620:down|ssc:100627019,ABL2,1…	http://amigo.geneontology.org/cgi-bin/amigo/term_details?term=GO:0007155
extracellular region	Cellular Component	GO:0005576	160	1270	4.91547e-10	3.53299e-07	ssc:497237,SCG2,497237:down|ssc:100270814,-,100270814:down|ssc:100155399,PNLIPRP1,100155399:up|ssc:397122,IL1B1,397122:down|ssc:100621027,CX3CL1,100621027:down|ssc:100624677,HNMT,100624677:down|ssc:100621675,-,100621675:down|ssc:396915,EDN1,396915:down|ssc:397620,FN1,397620:down|ssc:100270722,ARF5,100270722:up|ssc:100154994,SERPINB10,100154994:down|ssc:100522360,-,100522360:down|ssc:100623926,PRR…	http://amigo.geneontology.org/cgi-bin/amigo/term_details?term=GO:0005576
positive regulation of cell motility	Biological Process	GO:2000147	26	84	1.06998e-09	6.37872e-07	ssc:396900,AMCF-II,396900:down|ssc:396927,ZP3,396927:up|ssc:100127483,BMPR2,100127483:down|ssc:100525528,-,100525528:down|ssc:100621675,-,100621675:down|ssc:100524561,PPBP,100524561:down|ssc:397564,HBEGF,397564:down|ssc:100153791,CYR61,100153791:down|ssc:414372,CCR2,414372:down|ssc:780421,CMKLR1,780421:down|ssc:100113425,BMP4,100113425:down|ssc:100169702,PROX1,100169702:down|ssc:397497,FGF1,39749…	http://amigo.geneontology.org/cgi-bin/amigo/term_details?term=GO:2000147
leukocyte migration	Biological Process	GO:0050900	24	73	1.20065e-09	6.37872e-07	ssc:396900,AMCF-II,396900:down|ssc:396927,ZP3,396927:up|ssc:100621027,CX3CL1,100621027:down|ssc:100127489,S100A9,100127489:down|ssc:100525528,-,100525528:down|ssc:100621675,-,100621675:down|ssc:100515612,C5AR2,100515612:down|ssc:100524561,PPBP,100524561:down|ssc:100516668,RABGEF1,100516668:down|ssc:414372,CCR2,414372:down|ssc:780421,CMKLR1,780421:down|ssc:100620216,-,100620216:down|ssc:414374,CCR…	http://amigo.geneontology.org/cgi-bin/amigo/term_details?term=GO:0050900
cellular response to chemical stimulus	Biological Process	GO:0070887	83	528	1.24651e-09	6.37872e-07	ssc:100286778,PDK4,100286778:down|ssc:397122,IL1B1,397122:down|ssc:100522873,EPHA2,100522873:down|ssc:100621027,CX3CL1,100621027:down|ssc:494467,CXCL14,494467:down|ssc:100621675,-,100621675:down|ssc:396665,-,396665:down|ssc:780421,CMKLR1,780421:down|ssc:100037292,ACKR4,100037292:down|ssc:100144523,PMEPA1,100144523:down|ssc:100127164,PTGER2,100127164:down|ssc:654298,ID2,654298:down|ssc:100517086,C…	http://amigo.geneontology.org/cgi-bin/amigo/term_details?term=GO:0070887
chemotaxis	Biological Process	GO:0006935	35	142	1.44214e-09	6.37872e-07	ssc:414375,XCR1,414375:down|ssc:100522873,EPHA2,100522873:down|ssc:100621027,CX3CL1,100621027:down|ssc:494467,CXCL14,494467:down|ssc:100127489,S100A9,100127489:down|ssc:100621675,-,100621675:down|ssc:100524561,PPBP,100524561:down|ssc:780421,CMKLR1,780421:down|ssc:100037292,ACKR4,100037292:down|ssc:100620216,-,100620216:down|ssc:100038004,EGR2,100038004:down|ssc:397087,SPP1,397087:down|ssc:1001559…	http://amigo.geneontology.org/cgi-bin/amigo/term_details?term=GO:0006935
taxis	Biological Process	GO:0042330	35	142	1.44214e-09	6.37872e-07	ssc:414375,XCR1,414375:down|ssc:100522873,EPHA2,100522873:down|ssc:100621027,CX3CL1,100621027:down|ssc:494467,CXCL14,494467:down|ssc:100127489,S100A9,100127489:down|ssc:100621675,-,100621675:down|ssc:100524561,PPBP,100524561:down|ssc:780421,CMKLR1,780421:down|ssc:100037292,ACKR4,100037292:down|ssc:100620216,-,100620216:down|ssc:100038004,EGR2,100038004:down|ssc:397087,SPP1,397087:down|ssc:1001559…	http://amigo.geneontology.org/cgi-bin/amigo/term_details?term=GO:0042330
positive regulation of immune system process	Biological Process	GO:0002684	42	192	1.67292e-09	6.87092e-07	ssc:399541,TLR4,399541:down|ssc:396927,ZP3,396927:up|ssc:100627308,-,100627308:down|ssc:100621675,-,100621675:down|ssc:397492,DPP4,397492:down|ssc:100524561,PPBP,100524561:down|ssc:780421,CMKLR1,780421:down|ssc:100521992,HCLS1,100521992:down|ssc:445528,HLA-DMA,445528:down|ssc:100620216,-,100620216:down|ssc:100038025,CLEC7A,100038025:down|ssc:654298,ID2,654298:down|ssc:100049663,EDN3,100049663:up|…	http://amigo.geneontology.org/cgi-bin/amigo/term_details?term=GO:0002684
positive regulation of biological process	Biological Process	GO:0048518	154	1233	2.42192e-09	8.96314e-07	ssc:100270814,-,100270814:down|ssc:397122,IL1B1,397122:down|ssc:100621027,CX3CL1,100621027:down|ssc:396851,PIK3R5,396851:down|ssc:100622059,KCTD11,100622059:down|ssc:100152404,HEY2,100152404:down|ssc:100153460,AKAP5,100153460:down|ssc:100621675,-,100621675:down|ssc:396665,-,396665:down|ssc:100145894,JTB,100145894:up|ssc:780421,CMKLR1,780421:down|ssc:397620,FN1,397620:down|ssc:100519335,IFT57,1005…	http://amigo.geneontology.org/cgi-bin/amigo/term_details?term=GO:0048518
positive regulation of cellular component movement	Biological Process	GO:0051272	26	87	2.49409e-09	8.96314e-07	ssc:396900,AMCF-II,396900:down|ssc:396927,ZP3,396927:up|ssc:100127483,BMPR2,100127483:down|ssc:100525528,-,100525528:down|ssc:100621675,-,100621675:down|ssc:100524561,PPBP,100524561:down|ssc:397564,HBEGF,397564:down|ssc:100153791,CYR61,100153791:down|ssc:414372,CCR2,414372:down|ssc:780421,CMKLR1,780421:down|ssc:100113425,BMP4,100113425:down|ssc:100169702,PROX1,100169702:down|ssc:397497,FGF1,39749…	http://amigo.geneontology.org/cgi-bin/amigo/term_details?term=GO:0051272
leukocyte chemotaxis	Biological Process	GO:0030595	20	54	2.77942e-09	9.40098e-07	ssc:396900,AMCF-II,396900:down|ssc:100621027,CX3CL1,100621027:down|ssc:100127489,S100A9,100127489:down|ssc:100525528,-,100525528:down|ssc:100621675,-,100621675:down|ssc:100515612,C5AR2,100515612:down|ssc:100524561,PPBP,100524561:down|ssc:414372,CCR2,414372:down|ssc:780421,CMKLR1,780421:down|ssc:100620216,-,100620216:down|ssc:100525396,-,100525396:down|ssc:100049663,EDN3,100049663:up|ssc:396880,-,…	http://amigo.geneontology.org/cgi-bin/amigo/term_details?term=GO:0030595
regulation of cell migration	Biological Process	GO:0030334	34	139	3.09302e-09	9.88049e-07	ssc:396927,ZP3,396927:up|ssc:100522873,EPHA2,100522873:down|ssc:100523837,PRR5L,100523837:down|ssc:100621675,-,100621675:down|ssc:100524561,PPBP,100524561:down|ssc:780421,CMKLR1,780421:down|ssc:100517086,CSF1R,100517086:down|ssc:100049663,EDN3,100049663:up|ssc:100155367,RAP2A,100155367:down|ssc:396900,AMCF-II,396900:down|ssc:100525528,-,100525528:down|ssc:100127483,BMPR2,100127483:down|ssc:100515…	http://amigo.geneontology.org/cgi-bin/amigo/term_details?term=GO:0030334
regulation of immune system process	Biological Process	GO:0002682	51	266	3.81201e-09	1.15363e-06	ssc:399541,TLR4,399541:down|ssc:396927,ZP3,396927:up|ssc:100627308,-,100627308:down|ssc:100621675,-,100621675:down|ssc:397492,DPP4,397492:down|ssc:100524561,PPBP,100524561:down|ssc:100153191,SIT1,100153191:up|ssc:780421,CMKLR1,780421:down|ssc:100521992,HCLS1,100521992:down|ssc:445528,HLA-DMA,445528:down|ssc:100620216,-,100620216:down|ssc:100038025,CLEC7A,100038025:down|ssc:654298,ID2,654298:down|…	http://amigo.geneontology.org/cgi-bin/amigo/term_details?term=GO:0002682
cell motility	Biological Process	GO:0048870	55	300	4.87446e-09	1.33467e-06	ssc:396927,ZP3,396927:up|ssc:100522873,EPHA2,100522873:down|ssc:100621027,CX3CL1,100621027:down|ssc:100523837,PRR5L,100523837:down|ssc:494467,CXCL14,494467:down|ssc:100127489,S100A9,100127489:down|ssc:100621675,-,100621675:down|ssc:397492,DPP4,397492:down|ssc:100524561,PPBP,100524561:down|ssc:780421,CMKLR1,780421:down|ssc:100620216,-,100620216:down|ssc:100627019,ABL2,100627019:down|ssc:100520585,…	http://amigo.geneontology.org/cgi-bin/amigo/term_details?term=GO:0048870
localization of cell	Biological Process	GO:0051674	55	300	4.87446e-09	1.33467e-06	ssc:396927,ZP3,396927:up|ssc:100522873,EPHA2,100522873:down|ssc:100621027,CX3CL1,100621027:down|ssc:100523837,PRR5L,100523837:down|ssc:494467,CXCL14,494467:down|ssc:100127489,S100A9,100127489:down|ssc:100621675,-,100621675:down|ssc:397492,DPP4,397492:down|ssc:100524561,PPBP,100524561:down|ssc:780421,CMKLR1,780421:down|ssc:100620216,-,100620216:down|ssc:100627019,ABL2,100627019:down|ssc:100520585,…	http://amigo.geneontology.org/cgi-bin/amigo/term_details?term=GO:0051674
positive regulation of locomotion	Biological Process	GO:0040017	26	90	5.56611e-09	1.42423e-06	ssc:396900,AMCF-II,396900:down|ssc:396927,ZP3,396927:up|ssc:100127483,BMPR2,100127483:down|ssc:100525528,-,100525528:down|ssc:100621675,-,100621675:down|ssc:100524561,PPBP,100524561:down|ssc:397564,HBEGF,397564:down|ssc:100153791,CYR61,100153791:down|ssc:414372,CCR2,414372:down|ssc:780421,CMKLR1,780421:down|ssc:100113425,BMP4,100113425:down|ssc:100169702,PROX1,100169702:down|ssc:397497,FGF1,39749…	http://amigo.geneontology.org/cgi-bin/amigo/term_details?term=GO:0040017
regulation of cell motility	Biological Process	GO:2000145	35	149	5.69692e-09	1.42423e-06	ssc:396927,ZP3,396927:up|ssc:100522873,EPHA2,100522873:down|ssc:100523837,PRR5L,100523837:down|ssc:100621675,-,100621675:down|ssc:100524561,PPBP,100524561:down|ssc:780421,CMKLR1,780421:down|ssc:100517086,CSF1R,100517086:down|ssc:100049663,EDN3,100049663:up|ssc:100155367,RAP2A,100155367:down|ssc:396900,AMCF-II,396900:down|ssc:100525528,-,100525528:down|ssc:100127483,BMPR2,100127483:down|ssc:100515…	http://amigo.geneontology.org/cgi-bin/amigo/term_details?term=GO:2000145
regulation of cell proliferation	Biological Process	GO:0042127	62	361	6.80996e-09	1.63155e-06	ssc:396927,ZP3,396927:up|ssc:396951,PTHLH,396951:up|ssc:100627308,-,100627308:down|ssc:100622059,KCTD11,100622059:down|ssc:396628,VDR,396628:down|ssc:100152404,HEY2,100152404:down|ssc:100621675,-,100621675:down|ssc:397492,DPP4,397492:down|ssc:396665,-,396665:down|ssc:100153176,SFRP5,100153176:down|ssc:100524561,PPBP,100524561:down|ssc:100145894,JTB,100145894:up|ssc:100521992,HCLS1,100521992:down|…	http://amigo.geneontology.org/cgi-bin/amigo/term_details?term=GO:0042127
regulation of response to stimulus	Biological Process	GO:0048583	110	804	7.52666e-09	1.73113e-06	ssc:100270814,-,100270814:down|ssc:397122,IL1B1,397122:down|ssc:100522873,EPHA2,100522873:down|ssc:100621027,CX3CL1,100621027:down|ssc:396851,PIK3R5,396851:down|ssc:100622059,KCTD11,100622059:down|ssc:100152404,HEY2,100152404:down|ssc:100153460,AKAP5,100153460:down|ssc:100621675,-,100621675:down|ssc:100153176,SFRP5,100153176:down|ssc:100154195,-,100154195:down|ssc:780421,CMKLR1,780421:down|ssc:10…	http://amigo.geneontology.org/cgi-bin/amigo/term_details?term=GO:0048583
locomotion	Biological Process	GO:0040011	62	365	1.05757e-08	2.33886e-06	ssc:414375,XCR1,414375:down|ssc:396927,ZP3,396927:up|ssc:100522873,EPHA2,100522873:down|ssc:100621027,CX3CL1,100621027:down|ssc:100523837,PRR5L,100523837:down|ssc:494467,CXCL14,494467:down|ssc:100127489,S100A9,100127489:down|ssc:100621675,-,100621675:down|ssc:397492,DPP4,397492:down|ssc:100524561,PPBP,100524561:down|ssc:780421,CMKLR1,780421:down|ssc:100037292,ACKR4,100037292:down|ssc:100620216,-,…	http://amigo.geneontology.org/cgi-bin/amigo/term_details?term=GO:0040011
regulation of leukocyte migration	Biological Process	GO:0002685	17	43	1.38835e-08	2.95668e-06	ssc:396900,AMCF-II,396900:down|ssc:396927,ZP3,396927:up|ssc:100525528,-,100525528:down|ssc:100621675,-,100621675:down|ssc:100515612,C5AR2,100515612:down|ssc:100524561,PPBP,100524561:down|ssc:100516668,RABGEF1,100516668:down|ssc:414372,CCR2,414372:down|ssc:780421,CMKLR1,780421:down|ssc:100525396,-,100525396:down|ssc:100049663,EDN3,100049663:up|ssc:396880,-,396880:down|ssc:414374,CCR1,414374:down|s…	http://amigo.geneontology.org/cgi-bin/amigo/term_details?term=GO:0002685
cell proliferation	Biological Process	GO:0008283	70	445	2.95046e-08	6.00242e-06	ssc:100522873,EPHA2,100522873:down|ssc:100622059,KCTD11,100622059:down|ssc:100152404,HEY2,100152404:down|ssc:100621675,-,100621675:down|ssc:397492,DPP4,397492:down|ssc:396665,-,396665:down|ssc:100153176,SFRP5,100153176:down|ssc:100145894,JTB,100145894:up|ssc:100152038,OSM,100152038:down|ssc:100519335,IFT57,100519335:up|ssc:100127164,PTGER2,100127164:down|ssc:654298,ID2,654298:down|ssc:100517086,C…	http://amigo.geneontology.org/cgi-bin/amigo/term_details?term=GO:0008283
inflammatory response	Biological Process	GO:0006954	32	137	3.02731e-08	6.00242e-06	ssc:399541,TLR4,399541:down|ssc:396724,OLR1,396724:down|ssc:397122,IL1B1,397122:down|ssc:396927,ZP3,396927:up|ssc:100621027,CX3CL1,100621027:down|ssc:100127489,S100A9,100127489:down|ssc:100154607,S1PR3,100154607:down|ssc:100524561,PPBP,100524561:down|ssc:100524418,PTGDR,100524418:down|ssc:100620479,NRROS,100620479:down|ssc:397246,VNN1,397246:up|ssc:396766,CELA1,396766:up|ssc:397614,IL4R,397614:do…	http://amigo.geneontology.org/cgi-bin/amigo/term_details?term=GO:0006954
regulation of cellular component movement	Biological Process	GO:0051270	36	166	3.26185e-08	6.25188e-06	ssc:396927,ZP3,396927:up|ssc:100522873,EPHA2,100522873:down|ssc:100523837,PRR5L,100523837:down|ssc:100621675,-,100621675:down|ssc:100524561,PPBP,100524561:down|ssc:780421,CMKLR1,780421:down|ssc:100517086,CSF1R,100517086:down|ssc:100049663,EDN3,100049663:up|ssc:100155367,RAP2A,100155367:down|ssc:396900,AMCF-II,396900:down|ssc:100525528,-,100525528:down|ssc:100127483,BMPR2,100127483:down|ssc:100515…	http://amigo.geneontology.org/cgi-bin/amigo/term_details?term=GO:0051270
movement of cell or subcellular component	Biological Process	GO:0006928	61	368	3.62441e-08	6.72269e-06	ssc:396927,ZP3,396927:up|ssc:100522873,EPHA2,100522873:down|ssc:100621027,CX3CL1,100621027:down|ssc:100523837,PRR5L,100523837:down|ssc:494467,CXCL14,494467:down|ssc:100127489,S100A9,100127489:down|ssc:100621675,-,100621675:down|ssc:397492,DPP4,397492:down|ssc:100524561,PPBP,100524561:down|ssc:780421,CMKLR1,780421:down|ssc:100620216,-,100620216:down|ssc:100519335,IFT57,100519335:up|ssc:100627019,A…	http://amigo.geneontology.org/cgi-bin/amigo/term_details?term=GO:0006928
positive regulation of leukocyte migration	Biological Process	GO:0002687	15	36	4.32607e-08	7.77341e-06	ssc:396900,AMCF-II,396900:down|ssc:396927,ZP3,396927:up|ssc:100525528,-,100525528:down|ssc:100621675,-,100621675:down|ssc:414374,CCR1,414374:down|ssc:396880,-,396880:down|ssc:100049663,EDN3,100049663:up|ssc:100525396,-,100525396:down|ssc:100524561,PPBP,100524561:down|ssc:414372,CCR2,414372:down|ssc:780421,CMKLR1,780421:down|ssc:100519703,F2RL1,100519703:down|ssc:397271,AIF1,397271:down|ssc:396623…	http://amigo.geneontology.org/cgi-bin/amigo/term_details?term=GO:0002687
extracellular region part	Cellular Component	GO:0044421	134	1077	5.55245e-08	9.67472e-06	ssc:100270814,-,100270814:down|ssc:397122,IL1B1,397122:down|ssc:100624677,HNMT,100624677:down|ssc:100621675,-,100621675:down|ssc:397620,FN1,397620:down|ssc:100270722,ARF5,100270722:up|ssc:100154994,SERPINB10,100154994:down|ssc:100522360,-,100522360:down|ssc:445513,HAPLN1,445513:up|ssc:403163,EPCAM,403163:down|ssc:100155367,RAP2A,100155367:down|ssc:100513228,BAIAP2,100513228:down|ssc:733603,-,7336…	http://amigo.geneontology.org/cgi-bin/amigo/term_details?term=GO:0044421
myeloid leukocyte migration	Biological Process	GO:0097529	16	42	6.95387e-08	1.17602e-05	ssc:100621027,CX3CL1,100621027:down|ssc:100127489,S100A9,100127489:down|ssc:100621675,-,100621675:down|ssc:100515612,C5AR2,100515612:down|ssc:100524561,PPBP,100524561:down|ssc:414372,CCR2,414372:down|ssc:780421,CMKLR1,780421:down|ssc:100620216,-,100620216:down|ssc:100049663,EDN3,100049663:up|ssc:396880,-,396880:down|ssc:397087,SPP1,397087:down|ssc:414374,CCR1,414374:down|ssc:397271,AIF1,397271:do…	http://amigo.geneontology.org/cgi-bin/amigo/term_details?term=GO:0097529
regulation of locomotion	Biological Process	GO:0040012	35	166	1.07488e-07	1.76588e-05	ssc:396927,ZP3,396927:up|ssc:100522873,EPHA2,100522873:down|ssc:100523837,PRR5L,100523837:down|ssc:100621675,-,100621675:down|ssc:100524561,PPBP,100524561:down|ssc:780421,CMKLR1,780421:down|ssc:100517086,CSF1R,100517086:down|ssc:100049663,EDN3,100049663:up|ssc:100155367,RAP2A,100155367:down|ssc:396900,AMCF-II,396900:down|ssc:100525528,-,100525528:down|ssc:100127483,BMPR2,100127483:down|ssc:100515…	http://amigo.geneontology.org/cgi-bin/amigo/term_details?term=GO:0040012
cell activation	Biological Process	GO:0001775	40	205	1.22953e-07	1.94249e-05	ssc:399541,TLR4,399541:down|ssc:100127155,LMO4,100127155:up|ssc:396927,ZP3,396927:up|ssc:397492,DPP4,397492:down|ssc:396665,-,396665:down|ssc:100524561,PPBP,100524561:down|ssc:100153191,SIT1,100153191:up|ssc:445528,HLA-DMA,445528:down|ssc:100627019,ABL2,100627019:down|ssc:654298,ID2,654298:down|ssc:100152253,STX11,100152253:down|ssc:397246,VNN1,397246:up|ssc:100522131,FKBP1B,100522131:down|ssc:39…	http://amigo.geneontology.org/cgi-bin/amigo/term_details?term=GO:0001775
positive regulation of response to stimulus	Biological Process	GO:0048584	71	470	1.24995e-07	1.94249e-05	ssc:100270814,-,100270814:down|ssc:397122,IL1B1,397122:down|ssc:100621027,CX3CL1,100621027:down|ssc:396851,PIK3R5,396851:down|ssc:100153460,AKAP5,100153460:down|ssc:100621675,-,100621675:down|ssc:780421,CMKLR1,780421:down|ssc:100152038,OSM,100152038:down|ssc:445528,HLA-DMA,445528:down|ssc:100517086,CSF1R,100517086:down|ssc:100049663,EDN3,100049663:up|ssc:397614,IL4R,397614:down|ssc:100624161,G0S2…	http://amigo.geneontology.org/cgi-bin/amigo/term_details?term=GO:0048584
regulation of leukocyte chemotaxis	Biological Process	GO:0002688	14	34	1.47539e-07	2.23249e-05	ssc:396900,AMCF-II,396900:down|ssc:100525528,-,100525528:down|ssc:100621675,-,100621675:down|ssc:100515612,C5AR2,100515612:down|ssc:414374,CCR1,414374:down|ssc:396880,-,396880:down|ssc:100049663,EDN3,100049663:up|ssc:100525396,-,100525396:down|ssc:100524561,PPBP,100524561:down|ssc:414372,CCR2,414372:down|ssc:780421,CMKLR1,780421:down|ssc:100519703,F2RL1,100519703:down|ssc:397271,AIF1,397271:down|…	http://amigo.geneontology.org/cgi-bin/amigo/term_details?term=GO:0002688
leukocyte activation	Biological Process	GO:0045321	35	169	1.71461e-07	2.52795e-05	ssc:399541,TLR4,399541:down|ssc:396927,ZP3,396927:up|ssc:397492,DPP4,397492:down|ssc:100524561,PPBP,100524561:down|ssc:100153191,SIT1,100153191:up|ssc:445528,HLA-DMA,445528:down|ssc:100627019,ABL2,100627019:down|ssc:654298,ID2,654298:down|ssc:100152253,STX11,100152253:down|ssc:397246,VNN1,397246:up|ssc:100522131,FKBP1B,100522131:down|ssc:397614,IL4R,397614:down|ssc:100271930,IL7R,100271930:down|s…	http://amigo.geneontology.org/cgi-bin/amigo/term_details?term=GO:0045321
regulation of multicellular organismal process	Biological Process	GO:0051239	84	596	1.81754e-07	2.61271e-05	ssc:100286778,PDK4,100286778:down|ssc:396724,OLR1,396724:down|ssc:100522873,EPHA2,100522873:down|ssc:100621027,CX3CL1,100621027:down|ssc:100622059,KCTD11,100622059:down|ssc:100152404,HEY2,100152404:down|ssc:100154607,S1PR3,100154607:down|ssc:396665,-,396665:down|ssc:100153176,SFRP5,100153176:down|ssc:780421,CMKLR1,780421:down|ssc:445528,HLA-DMA,445528:down|ssc:396915,EDN1,396915:down|ssc:397620,F…	http://amigo.geneontology.org/cgi-bin/amigo/term_details?term=GO:0051239
neutrophil chemotaxis	Biological Process	GO:0030593	11	22	2.96744e-07	4.06257e-05	ssc:100621027,CX3CL1,100621027:down|ssc:100127489,S100A9,100127489:down|ssc:100621675,-,100621675:down|ssc:100515612,C5AR2,100515612:down|ssc:397087,SPP1,397087:down|ssc:396880,-,396880:down|ssc:100049663,EDN3,100049663:up|ssc:100524561,PPBP,100524561:down|ssc:100620216,-,100620216:down|ssc:397406,FCER1G,397406:down|ssc:100620730,-,100620730:down	http://amigo.geneontology.org/cgi-bin/amigo/term_details?term=GO:0030593
neutrophil migration	Biological Process	GO:1990266	11	22	2.96744e-07	4.06257e-05	ssc:100621027,CX3CL1,100621027:down|ssc:100127489,S100A9,100127489:down|ssc:100621675,-,100621675:down|ssc:100515612,C5AR2,100515612:down|ssc:397087,SPP1,397087:down|ssc:396880,-,396880:down|ssc:100049663,EDN3,100049663:up|ssc:100524561,PPBP,100524561:down|ssc:100620216,-,100620216:down|ssc:397406,FCER1G,397406:down|ssc:100620730,-,100620730:down	http://amigo.geneontology.org/cgi-bin/amigo/term_details?term=GO:1990266
positive regulation of leukocyte chemotaxis	Biological Process	GO:0002690	13	32	5.01637e-07	6.70793e-05	ssc:396900,AMCF-II,396900:down|ssc:100525528,-,100525528:down|ssc:100621675,-,100621675:down|ssc:414374,CCR1,414374:down|ssc:396880,-,396880:down|ssc:100049663,EDN3,100049663:up|ssc:100525396,-,100525396:down|ssc:100524561,PPBP,100524561:down|ssc:414372,CCR2,414372:down|ssc:780421,CMKLR1,780421:down|ssc:100519703,F2RL1,100519703:down|ssc:397271,AIF1,397271:down|ssc:100620730,-,100620730:down	http://amigo.geneontology.org/cgi-bin/amigo/term_details?term=GO:0002690
cellular response to organic substance	Biological Process	GO:0071310	65	432	5.30164e-07	6.92828e-05	ssc:100286778,PDK4,100286778:down|ssc:397122,IL1B1,397122:down|ssc:100621027,CX3CL1,100621027:down|ssc:396665,-,396665:down|ssc:780421,CMKLR1,780421:down|ssc:100037292,ACKR4,100037292:down|ssc:100144523,PMEPA1,100144523:down|ssc:100127164,PTGER2,100127164:down|ssc:100517086,CSF1R,100517086:down|ssc:100038004,EGR2,100038004:down|ssc:100512012,WFIKKN2,100512012:up|ssc:397614,IL4R,397614:down|ssc:10…	http://amigo.geneontology.org/cgi-bin/amigo/term_details?term=GO:0071310
defense response	Biological Process	GO:0006952	54	336	6.62778e-07	8.32698e-05	ssc:100519446,PLD1,100519446:down|ssc:399541,TLR4,399541:down|ssc:396724,OLR1,396724:down|ssc:397122,IL1B1,397122:down|ssc:396927,ZP3,396927:up|ssc:100627308,-,100627308:down|ssc:100621027,CX3CL1,100621027:down|ssc:100127489,S100A9,100127489:down|ssc:100154607,S1PR3,100154607:down|ssc:100524561,PPBP,100524561:down|ssc:100514958,SLAMF8,100514958:down|ssc:100524418,PTGDR,100524418:down|ssc:397201,J…	http://amigo.geneontology.org/cgi-bin/amigo/term_details?term=GO:0006952
positive regulation of cellular process	Biological Process	GO:0048522	131	1090	6.66159e-07	8.32698e-05	ssc:100270814,-,100270814:down|ssc:397122,IL1B1,397122:down|ssc:100621027,CX3CL1,100621027:down|ssc:396851,PIK3R5,396851:down|ssc:100622059,KCTD11,100622059:down|ssc:100152404,HEY2,100152404:down|ssc:100153460,AKAP5,100153460:down|ssc:100621675,-,100621675:down|ssc:396665,-,396665:down|ssc:100145894,JTB,100145894:up|ssc:780421,CMKLR1,780421:down|ssc:397620,FN1,397620:down|ssc:100519335,IFT57,1005…	http://amigo.geneontology.org/cgi-bin/amigo/term_details?term=GO:0048522
positive regulation of response to external stimulus	Biological Process	GO:0032103	19	66	6.94535e-07	8.33857e-05	ssc:396900,AMCF-II,396900:down|ssc:396927,ZP3,396927:up|ssc:100621027,CX3CL1,100621027:down|ssc:100127483,BMPR2,100127483:down|ssc:100127489,S100A9,100127489:down|ssc:100525528,-,100525528:down|ssc:100621675,-,100621675:down|ssc:100524561,PPBP,100524561:down|ssc:414372,CCR2,414372:down|ssc:780421,CMKLR1,780421:down|ssc:100525396,-,100525396:down|ssc:100049663,EDN3,100049663:up|ssc:396880,-,396880…	http://amigo.geneontology.org/cgi-bin/amigo/term_details?term=GO:0032103
granulocyte chemotaxis	Biological Process	GO:0071621	12	28	6.96089e-07	8.33857e-05	ssc:100621027,CX3CL1,100621027:down|ssc:100127489,S100A9,100127489:down|ssc:100621675,-,100621675:down|ssc:100515612,C5AR2,100515612:down|ssc:397087,SPP1,397087:down|ssc:396880,-,396880:down|ssc:100049663,EDN3,100049663:up|ssc:100524561,PPBP,100524561:down|ssc:780421,CMKLR1,780421:down|ssc:100620216,-,100620216:down|ssc:397406,FCER1G,397406:down|ssc:100620730,-,100620730:down	http://amigo.geneontology.org/cgi-bin/amigo/term_details?term=GO:0071621
cell surface	Cellular Component	GO:0009986	34	171	7.10652e-07	8.33928e-05	ssc:100522873,EPHA2,100522873:down|ssc:100621027,CX3CL1,100621027:down|ssc:100621355,MXRA8,100621355:up|ssc:397492,DPP4,397492:down|ssc:445528,HLA-DMA,445528:down|ssc:396806,BSP1,396806:up|ssc:100155091,ITGA5,100155091:down|ssc:100517086,CSF1R,100517086:down|ssc:100156280,GREM1,100156280:down|ssc:100516729,STAMBP,100516729:down|ssc:100156882,FURIN,100156882:down|ssc:403163,EPCAM,403163:down|ssc:1…	http://amigo.geneontology.org/cgi-bin/amigo/term_details?term=GO:0009986
response to organic substance	Biological Process	GO:0010033	75	529	7.32803e-07	8.42723e-05	ssc:100286778,PDK4,100286778:down|ssc:397122,IL1B1,397122:down|ssc:100522873,EPHA2,100522873:down|ssc:100621027,CX3CL1,100621027:down|ssc:396665,-,396665:down|ssc:780421,CMKLR1,780421:down|ssc:100037292,ACKR4,100037292:down|ssc:100144523,PMEPA1,100144523:down|ssc:100127164,PTGER2,100127164:down|ssc:100517086,CSF1R,100517086:down|ssc:100038004,EGR2,100038004:down|ssc:100512012,WFIKKN2,100512012:up…	http://amigo.geneontology.org/cgi-bin/amigo/term_details?term=GO:0010033
regulation of chemotaxis	Biological Process	GO:0050920	15	44	9.65032e-07	0.000108803	ssc:396900,AMCF-II,396900:down|ssc:100127483,BMPR2,100127483:down|ssc:100525528,-,100525528:down|ssc:100621675,-,100621675:down|ssc:100515612,C5AR2,100515612:down|ssc:414374,CCR1,414374:down|ssc:396880,-,396880:down|ssc:100049663,EDN3,100049663:up|ssc:100525396,-,100525396:down|ssc:100524561,PPBP,100524561:down|ssc:414372,CCR2,414372:down|ssc:780421,CMKLR1,780421:down|ssc:100519703,F2RL1,10051970…	http://amigo.geneontology.org/cgi-bin/amigo/term_details?term=GO:0050920
positive regulation of chemotaxis	Biological Process	GO:0050921	14	39	1.08943e-06	0.000119386	ssc:396900,AMCF-II,396900:down|ssc:100127483,BMPR2,100127483:down|ssc:100525528,-,100525528:down|ssc:100621675,-,100621675:down|ssc:414374,CCR1,414374:down|ssc:396880,-,396880:down|ssc:100049663,EDN3,100049663:up|ssc:100525396,-,100525396:down|ssc:100524561,PPBP,100524561:down|ssc:414372,CCR2,414372:down|ssc:780421,CMKLR1,780421:down|ssc:100519703,F2RL1,100519703:down|ssc:397271,AIF1,397271:down|…	http://amigo.geneontology.org/cgi-bin/amigo/term_details?term=GO:0050921
granulocyte migration	Biological Process	GO:0097530	12	29	1.10042e-06	0.000119386	ssc:100621027,CX3CL1,100621027:down|ssc:100127489,S100A9,100127489:down|ssc:100621675,-,100621675:down|ssc:100515612,C5AR2,100515612:down|ssc:397087,SPP1,397087:down|ssc:396880,-,396880:down|ssc:100049663,EDN3,100049663:up|ssc:100524561,PPBP,100524561:down|ssc:780421,CMKLR1,780421:down|ssc:100620216,-,100620216:down|ssc:397406,FCER1G,397406:down|ssc:100620730,-,100620730:down	http://amigo.geneontology.org/cgi-bin/amigo/term_details?term=GO:0097530
myeloid cell activation involved in immune response	Biological Process	GO:0002275	8	13	1.66552e-06	0.000177224	ssc:100155631,FES,100155631:down|ssc:100511161,PLA2G3,100511161:down|ssc:100152253,STX11,100152253:down|ssc:100524561,PPBP,100524561:down|ssc:100516668,RABGEF1,100516668:down|ssc:100519703,F2RL1,100519703:down|ssc:397405,TYROBP,397405:down|ssc:397406,FCER1G,397406:down	http://amigo.geneontology.org/cgi-bin/amigo/term_details?term=GO:0002275
myeloid leukocyte activation	Biological Process	GO:0002274	13	35	1.69519e-06	0.000177224	ssc:399541,TLR4,399541:down|ssc:100155631,FES,100155631:down|ssc:100511161,PLA2G3,100511161:down|ssc:396880,-,396880:down|ssc:100152253,STX11,100152253:down|ssc:100524561,PPBP,100524561:down|ssc:100516668,RABGEF1,100516668:down|ssc:100519703,F2RL1,100519703:down|ssc:397614,IL4R,397614:down|ssc:397106,IL10,397106:down|ssc:397405,TYROBP,397405:down|ssc:100620730,-,100620730:down|ssc:397406,FCER1G,3…	http://amigo.geneontology.org/cgi-bin/amigo/term_details?term=GO:0002274
hemopoiesis	Biological Process	GO:0030097	37	203	2.12911e-06	0.000218614	ssc:100522873,EPHA2,100522873:down|ssc:100521992,HCLS1,100521992:down|ssc:445528,HLA-DMA,445528:down|ssc:100622220,SLC25A38,100622220:up|ssc:397201,JAK2,397201:down|ssc:100627019,ABL2,100627019:down|ssc:100519098,SAMD9,100519098:down|ssc:654298,ID2,654298:down|ssc:100517086,CSF1R,100517086:down|ssc:100524095,PLD4,100524095:down|ssc:397246,VNN1,397246:up|ssc:397614,IL4R,397614:down|ssc:100038002,A…	http://amigo.geneontology.org/cgi-bin/amigo/term_details?term=GO:0030097
granulocyte activation	Biological Process	GO:0036230	7	10	2.24122e-06	0.00022219	ssc:100519703,F2RL1,100519703:down|ssc:397405,TYROBP,397405:down|ssc:100620730,-,100620730:down|ssc:397406,FCER1G,397406:down|ssc:396880,-,396880:down|ssc:100152253,STX11,100152253:down|ssc:100524561,PPBP,100524561:down	http://amigo.geneontology.org/cgi-bin/amigo/term_details?term=GO:0036230
neutrophil activation	Biological Process	GO:0042119	7	10	2.24122e-06	0.00022219	ssc:100519703,F2RL1,100519703:down|ssc:397405,TYROBP,397405:down|ssc:100620730,-,100620730:down|ssc:397406,FCER1G,397406:down|ssc:396880,-,396880:down|ssc:100152253,STX11,100152253:down|ssc:100524561,PPBP,100524561:down	http://amigo.geneontology.org/cgi-bin/amigo/term_details?term=GO:0042119
chemokine-mediated signaling pathway	Biological Process	GO:0070098	13	36	2.45827e-06	0.000239577	ssc:396900,AMCF-II,396900:down|ssc:414375,XCR1,414375:down|ssc:100525528,-,100525528:down|ssc:414374,CCR1,414374:down|ssc:396880,-,396880:down|ssc:100525396,-,100525396:down|ssc:100524561,PPBP,100524561:down|ssc:414372,CCR2,414372:down|ssc:780421,CMKLR1,780421:down|ssc:100737352,ACKR2,100737352:down|ssc:414371,CCR5,414371:down|ssc:100037292,ACKR4,100037292:down|ssc:100620730,-,100620730:down	http://amigo.geneontology.org/cgi-bin/amigo/term_details?term=GO:0070098
response to cytokine	Biological Process	GO:0034097	31	158	2.98507e-06	0.000285956	ssc:396900,AMCF-II,396900:down|ssc:414375,XCR1,414375:down|ssc:397122,IL1B1,397122:down|ssc:100621027,CX3CL1,100621027:down|ssc:100516458,TNFSF18,100516458:down|ssc:100525528,-,100525528:down|ssc:100524561,PPBP,100524561:down|ssc:100516668,RABGEF1,100516668:down|ssc:414372,CCR2,414372:down|ssc:100737352,ACKR2,100737352:down|ssc:780421,CMKLR1,780421:down|ssc:100521992,HCLS1,100521992:down|ssc:1001…	http://amigo.geneontology.org/cgi-bin/amigo/term_details?term=GO:0034097
positive regulation of behavior	Biological Process	GO:0048520	14	42	3.03362e-06	0.000285956	ssc:396900,AMCF-II,396900:down|ssc:100127483,BMPR2,100127483:down|ssc:100525528,-,100525528:down|ssc:100621675,-,100621675:down|ssc:414374,CCR1,414374:down|ssc:396880,-,396880:down|ssc:100049663,EDN3,100049663:up|ssc:100525396,-,100525396:down|ssc:100524561,PPBP,100524561:down|ssc:414372,CCR2,414372:down|ssc:780421,CMKLR1,780421:down|ssc:100519703,F2RL1,100519703:down|ssc:397271,AIF1,397271:down|…	http://amigo.geneontology.org/cgi-bin/amigo/term_details?term=GO:0048520
myeloid leukocyte mediated immunity	Biological Process	GO:0002444	8	14	3.60947e-06	0.000334749	ssc:396900,AMCF-II,396900:down|ssc:100155631,FES,100155631:down|ssc:100511161,PLA2G3,100511161:down|ssc:100152253,STX11,100152253:down|ssc:100524561,PPBP,100524561:down|ssc:100516668,RABGEF1,100516668:down|ssc:100519703,F2RL1,100519703:down|ssc:397406,FCER1G,397406:down	http://amigo.geneontology.org/cgi-bin/amigo/term_details?term=GO:0002444
response to external stimulus	Biological Process	GO:0009605	67	477	4.32736e-06	0.000394958	ssc:100519446,PLD1,100519446:down|ssc:100286778,PDK4,100286778:down|ssc:100522873,EPHA2,100522873:down|ssc:100621027,CX3CL1,100621027:down|ssc:494467,CXCL14,494467:down|ssc:100621675,-,100621675:down|ssc:780421,CMKLR1,780421:down|ssc:100037292,ACKR4,100037292:down|ssc:100127164,PTGER2,100127164:down|ssc:654298,ID2,654298:down|ssc:100038004,EGR2,100038004:down|ssc:100049663,EDN3,100049663:up|ssc:1…	http://amigo.geneontology.org/cgi-bin/amigo/term_details?term=GO:0009605
regulation of cell adhesion	Biological Process	GO:0030155	28	138	4.59565e-06	0.00041289	ssc:100627882,CYTIP,100627882:down|ssc:396927,ZP3,396927:up|ssc:100522873,EPHA2,100522873:down|ssc:100621027,CX3CL1,100621027:down|ssc:100516458,TNFSF18,100516458:down|ssc:100621675,-,100621675:down|ssc:397492,DPP4,397492:down|ssc:100153791,CYR61,100153791:down|ssc:100153191,SIT1,100153191:up|ssc:445528,HLA-DMA,445528:down|ssc:100155958,SRF,100155958:down|ssc:100525094,SASH3,100525094:down|ssc:10…	http://amigo.geneontology.org/cgi-bin/amigo/term_details?term=GO:0030155
cellular response to cytokine stimulus	Biological Process	GO:0071345	28	139	5.32346e-06	0.00046786	ssc:396900,AMCF-II,396900:down|ssc:414375,XCR1,414375:down|ssc:397122,IL1B1,397122:down|ssc:100621027,CX3CL1,100621027:down|ssc:100516458,TNFSF18,100516458:down|ssc:100525528,-,100525528:down|ssc:100524561,PPBP,100524561:down|ssc:100516668,RABGEF1,100516668:down|ssc:414372,CCR2,414372:down|ssc:100737352,ACKR2,100737352:down|ssc:780421,CMKLR1,780421:down|ssc:100521992,HCLS1,100521992:down|ssc:4143…	http://amigo.geneontology.org/cgi-bin/amigo/term_details?term=GO:0071345
response to bacterium	Biological Process	GO:0009617	26	124	5.37022e-06	0.00046786	ssc:100519446,PLD1,100519446:down|ssc:100521232,DEFB123,100521232:up|ssc:399541,TLR4,399541:down|ssc:396900,AMCF-II,396900:down|ssc:100525528,-,100525528:down|ssc:100154350,NFKBIL1,100154350:up|ssc:100524561,PPBP,100524561:down|ssc:100514958,SLAMF8,100514958:down|ssc:100513746,NOCT,100513746:down|ssc:414371,CCR5,414371:down|ssc:100620216,-,100620216:down|ssc:100127164,PTGER2,100127164:down|ssc:39…	http://amigo.geneontology.org/cgi-bin/amigo/term_details?term=GO:0009617
signal transduction by protein phosphorylation	Biological Process	GO:0023014	36	203	5.65652e-06	0.000482617	ssc:100126293,CASS4,100126293:down|ssc:100270814,-,100270814:down|ssc:397122,IL1B1,397122:down|ssc:100522873,EPHA2,100522873:down|ssc:396851,PIK3R5,396851:down|ssc:396665,-,396665:down|ssc:100153176,SFRP5,100153176:down|ssc:100152038,OSM,100152038:down|ssc:100627019,ABL2,100627019:down|ssc:733670,RGS2,733670:up|ssc:100517086,CSF1R,100517086:down|ssc:100520599,FAM58A,100520599:up|ssc:100049663,EDN…	http://amigo.geneontology.org/cgi-bin/amigo/term_details?term=GO:0023014
leukocyte degranulation	Biological Process	GO:0043299	7	11	5.73011e-06	0.000482617	ssc:100516668,RABGEF1,100516668:down|ssc:100519703,F2RL1,100519703:down|ssc:100155631,FES,100155631:down|ssc:100511161,PLA2G3,100511161:down|ssc:397406,FCER1G,397406:down|ssc:100152253,STX11,100152253:down|ssc:100524561,PPBP,100524561:down	http://amigo.geneontology.org/cgi-bin/amigo/term_details?term=GO:0043299
cell-cell adhesion	Biological Process	GO:0098609	35	195	5.7914e-06	0.000482617	ssc:396927,ZP3,396927:up|ssc:100621027,CX3CL1,100621027:down|ssc:100127489,S100A9,100127489:down|ssc:100621675,-,100621675:down|ssc:397492,DPP4,397492:down|ssc:100153191,SIT1,100153191:up|ssc:445528,HLA-DMA,445528:down|ssc:100627019,ABL2,100627019:down|ssc:100155091,ITGA5,100155091:down|ssc:100152253,STX11,100152253:down|ssc:397246,VNN1,397246:up|ssc:403163,EPCAM,403163:down|ssc:100522131,FKBP1B,…	http://amigo.geneontology.org/cgi-bin/amigo/term_details?term=GO:0098609
hematopoietic or lymphoid organ development	Biological Process	GO:0048534	38	221	6.61932e-06	0.00054373	ssc:100127155,LMO4,100127155:up|ssc:100522873,EPHA2,100522873:down|ssc:100521992,HCLS1,100521992:down|ssc:445528,HLA-DMA,445528:down|ssc:100622220,SLC25A38,100622220:up|ssc:397201,JAK2,397201:down|ssc:100627019,ABL2,100627019:down|ssc:100519098,SAMD9,100519098:down|ssc:654298,ID2,654298:down|ssc:100517086,CSF1R,100517086:down|ssc:100524095,PLD4,100524095:down|ssc:397246,VNN1,397246:up|ssc:397614,…	http://amigo.geneontology.org/cgi-bin/amigo/term_details?term=GO:0048534
single organism cell adhesion	Biological Process	GO:0098602	34	190	8.44862e-06	0.000681207	ssc:396927,ZP3,396927:up|ssc:100621027,CX3CL1,100621027:down|ssc:100127489,S100A9,100127489:down|ssc:100621675,-,100621675:down|ssc:397492,DPP4,397492:down|ssc:100153191,SIT1,100153191:up|ssc:445528,HLA-DMA,445528:down|ssc:397620,FN1,397620:down|ssc:100627019,ABL2,100627019:down|ssc:100155091,ITGA5,100155091:down|ssc:100152253,STX11,100152253:down|ssc:397246,VNN1,397246:up|ssc:403163,EPCAM,403163…	http://amigo.geneontology.org/cgi-bin/amigo/term_details?term=GO:0098602
intracellular signal transduction	Biological Process	GO:0035556	80	613	8.52989e-06	0.000681207	ssc:100270814,-,100270814:down|ssc:397122,IL1B1,397122:down|ssc:100522873,EPHA2,100522873:down|ssc:396851,PIK3R5,396851:down|ssc:100153460,AKAP5,100153460:down|ssc:100621675,-,100621675:down|ssc:396665,-,396665:down|ssc:100153176,SFRP5,100153176:down|ssc:100154195,-,100154195:down|ssc:780421,CMKLR1,780421:down|ssc:100152038,OSM,100152038:down|ssc:404772,GEM,404772:down|ssc:100514585,RAB3B,1005145…	http://amigo.geneontology.org/cgi-bin/amigo/term_details?term=GO:0035556
developmental process	Biological Process	GO:0032502	150	1348	8.75073e-06	0.00068927	ssc:100621027,CX3CL1,100621027:down|ssc:100622059,KCTD11,100622059:down|ssc:100624677,HNMT,100624677:down|ssc:100152404,HEY2,100152404:down|ssc:396665,-,396665:down|ssc:780421,CMKLR1,780421:down|ssc:100622220,SLC25A38,100622220:up|ssc:100521487,WEE1,100521487:down|ssc:100518612,MFSD2A,100518612:down|ssc:397620,FN1,397620:down|ssc:100519335,IFT57,100519335:up|ssc:100522360,-,100522360:down|ssc:100…	http://amigo.geneontology.org/cgi-bin/amigo/term_details?term=GO:0032502
protein phosphorylation	Biological Process	GO:0006468	65	468	8.9624e-06	0.000696403	ssc:100270814,-,100270814:down|ssc:100286778,PDK4,100286778:down|ssc:397122,IL1B1,397122:down|ssc:100522873,EPHA2,100522873:down|ssc:396851,PIK3R5,396851:down|ssc:396665,-,396665:down|ssc:100153176,SFRP5,100153176:down|ssc:100145894,JTB,100145894:up|ssc:100152038,OSM,100152038:down|ssc:100521487,WEE1,100521487:down|ssc:100144523,PMEPA1,100144523:down|ssc:100517086,CSF1R,100517086:down|ssc:1000496…	http://amigo.geneontology.org/cgi-bin/amigo/term_details?term=GO:0006468
regulation of cell communication	Biological Process	GO:0010646	88	695	9.68781e-06	0.000727874	ssc:100270814,-,100270814:down|ssc:397122,IL1B1,397122:down|ssc:100522873,EPHA2,100522873:down|ssc:100621027,CX3CL1,100621027:down|ssc:396851,PIK3R5,396851:down|ssc:100622059,KCTD11,100622059:down|ssc:100152404,HEY2,100152404:down|ssc:100153460,AKAP5,100153460:down|ssc:100153176,SFRP5,100153176:down|ssc:100154195,-,100154195:down|ssc:780421,CMKLR1,780421:down|ssc:100152038,OSM,100152038:down|ssc:…	http://amigo.geneontology.org/cgi-bin/amigo/term_details?term=GO:0010646
phosphorylation	Biological Process	GO:0016310	74	556	9.69415e-06	0.000727874	ssc:100270814,-,100270814:down|ssc:100286778,PDK4,100286778:down|ssc:397122,IL1B1,397122:down|ssc:100522873,EPHA2,100522873:down|ssc:396851,PIK3R5,396851:down|ssc:396665,-,396665:down|ssc:100153176,SFRP5,100153176:down|ssc:100145894,JTB,100145894:up|ssc:100152038,OSM,100152038:down|ssc:100521487,WEE1,100521487:down|ssc:100144523,PMEPA1,100144523:down|ssc:100517086,CSF1R,100517086:down|ssc:1000496…	http://amigo.geneontology.org/cgi-bin/amigo/term_details?term=GO:0016310
cytokine-mediated signaling pathway	Biological Process	GO:0019221	24	113	9.80912e-06	0.000727874	ssc:396900,AMCF-II,396900:down|ssc:414375,XCR1,414375:down|ssc:397122,IL1B1,397122:down|ssc:100621027,CX3CL1,100621027:down|ssc:100516458,TNFSF18,100516458:down|ssc:100525528,-,100525528:down|ssc:100524561,PPBP,100524561:down|ssc:100516668,RABGEF1,100516668:down|ssc:414372,CCR2,414372:down|ssc:100737352,ACKR2,100737352:down|ssc:780421,CMKLR1,780421:down|ssc:414371,CCR5,414371:down|ssc:100037292,A…	http://amigo.geneontology.org/cgi-bin/amigo/term_details?term=GO:0019221
leukocyte cell-cell adhesion	Biological Process	GO:0007159	26	128	9.87377e-06	0.000727874	ssc:100519177,GIMAP1,100519177:down|ssc:396927,ZP3,396927:up|ssc:100516458,TNFSF18,100516458:down|ssc:100127489,S100A9,100127489:down|ssc:100621675,-,100621675:down|ssc:397492,DPP4,397492:down|ssc:100153191,SIT1,100153191:up|ssc:445528,HLA-DMA,445528:down|ssc:100155958,SRF,100155958:down|ssc:100525094,SASH3,100525094:down|ssc:100516296,EGR3,100516296:down|ssc:100113425,BMP4,100113425:down|ssc:100…	http://amigo.geneontology.org/cgi-bin/amigo/term_details?term=GO:0007159
regulation of signaling	Biological Process	GO:0023051	88	696	1.02698e-05	0.000739899	ssc:100270814,-,100270814:down|ssc:397122,IL1B1,397122:down|ssc:100522873,EPHA2,100522873:down|ssc:100621027,CX3CL1,100621027:down|ssc:396851,PIK3R5,396851:down|ssc:100622059,KCTD11,100622059:down|ssc:100152404,HEY2,100152404:down|ssc:100153460,AKAP5,100153460:down|ssc:100153176,SFRP5,100153176:down|ssc:100154195,-,100154195:down|ssc:780421,CMKLR1,780421:down|ssc:100152038,OSM,100152038:down|ssc:…	http://amigo.geneontology.org/cgi-bin/amigo/term_details?term=GO:0023051
regulation of developmental process	Biological Process	GO:0050793	70	518	1.02943e-05	0.000739899	ssc:100127155,LMO4,100127155:up|ssc:100522873,EPHA2,100522873:down|ssc:100621027,CX3CL1,100621027:down|ssc:100622059,KCTD11,100622059:down|ssc:494467,CXCL14,494467:down|ssc:100152404,HEY2,100152404:down|ssc:100154607,S1PR3,100154607:down|ssc:396665,-,396665:down|ssc:100153176,SFRP5,100153176:down|ssc:780421,CMKLR1,780421:down|ssc:445528,HLA-DMA,445528:down|ssc:397620,FN1,397620:down|ssc:654298,ID…	http://amigo.geneontology.org/cgi-bin/amigo/term_details?term=GO:0050793
positive regulation of cell differentiation	Biological Process	GO:0045597	34	193	1.19972e-05	0.000851651	ssc:100622059,KCTD11,100622059:down|ssc:396628,VDR,396628:down|ssc:780421,CMKLR1,780421:down|ssc:100521992,HCLS1,100521992:down|ssc:445528,HLA-DMA,445528:down|ssc:397620,FN1,397620:down|ssc:100627019,ABL2,100627019:down|ssc:100152419,FRZB,100152419:up|ssc:654298,ID2,654298:down|ssc:100156280,GREM1,100156280:down|ssc:397246,VNN1,397246:up|ssc:397614,IL4R,397614:down|ssc:100271930,IL7R,100271930:do…	http://amigo.geneontology.org/cgi-bin/amigo/term_details?term=GO:0045597
regulation of leukocyte activation	Biological Process	GO:0002694	21	93	1.31137e-05	0.000919559	ssc:396927,ZP3,396927:up|ssc:100516458,TNFSF18,100516458:down|ssc:397492,DPP4,397492:down|ssc:100516668,RABGEF1,100516668:down|ssc:100153191,SIT1,100153191:up|ssc:445528,HLA-DMA,445528:down|ssc:100525094,SASH3,100525094:down|ssc:100516296,EGR3,100516296:down|ssc:100113425,BMP4,100113425:down|ssc:100038026,TNFSF13B,100038026:down|ssc:100155631,FES,100155631:down|ssc:654298,ID2,654298:down|ssc:1001…	http://amigo.geneontology.org/cgi-bin/amigo/term_details?term=GO:0002694
positive regulation of hemopoiesis	Biological Process	GO:1903708	14	47	1.33731e-05	0.000926448	ssc:100627693,RAB7B,100627693:down|ssc:397093,INHBA,397093:down|ssc:100155631,FES,100155631:down|ssc:654298,ID2,654298:down|ssc:414374,CCR1,414374:down|ssc:397246,VNN1,397246:up|ssc:100152462,ACVR1B,100152462:down|ssc:100521992,HCLS1,100521992:down|ssc:445528,HLA-DMA,445528:down|ssc:397614,IL4R,397614:down|ssc:399503,LIF,399503:down|ssc:100525094,SASH3,100525094:down|ssc:100516296,EGR3,100516296:…	http://amigo.geneontology.org/cgi-bin/amigo/term_details?term=GO:1903708
response to stress	Biological Process	GO:0006950	97	794	1.45892e-05	0.000998669	ssc:100519446,PLD1,100519446:down|ssc:100286778,PDK4,100286778:down|ssc:396724,OLR1,396724:down|ssc:397122,IL1B1,397122:down|ssc:100522873,EPHA2,100522873:down|ssc:100621027,CX3CL1,100621027:down|ssc:100152404,HEY2,100152404:down|ssc:397492,DPP4,397492:down|ssc:100154607,S1PR3,100154607:down|ssc:100153176,SFRP5,100153176:down|ssc:100152038,OSM,100152038:down|ssc:397620,FN1,397620:down|ssc:654298,…	http://amigo.geneontology.org/cgi-bin/amigo/term_details?term=GO:0006950
regulation of cell activation	Biological Process	GO:0050865	22	101	1.50876e-05	0.00102063	ssc:100127155,LMO4,100127155:up|ssc:396927,ZP3,396927:up|ssc:100516458,TNFSF18,100516458:down|ssc:397492,DPP4,397492:down|ssc:100516668,RABGEF1,100516668:down|ssc:100153191,SIT1,100153191:up|ssc:445528,HLA-DMA,445528:down|ssc:100525094,SASH3,100525094:down|ssc:100516296,EGR3,100516296:down|ssc:100113425,BMP4,100113425:down|ssc:100038026,TNFSF13B,100038026:down|ssc:100155631,FES,100155631:down|ssc…	http://amigo.geneontology.org/cgi-bin/amigo/term_details?term=GO:0050865
single organismal cell-cell adhesion	Biological Process	GO:0016337	32	180	1.79399e-05	0.00119947	ssc:396927,ZP3,396927:up|ssc:100621027,CX3CL1,100621027:down|ssc:100127489,S100A9,100127489:down|ssc:100621675,-,100621675:down|ssc:397492,DPP4,397492:down|ssc:100153191,SIT1,100153191:up|ssc:445528,HLA-DMA,445528:down|ssc:100627019,ABL2,100627019:down|ssc:100155091,ITGA5,100155091:down|ssc:100152253,STX11,100152253:down|ssc:397246,VNN1,397246:up|ssc:403163,EPCAM,403163:down|ssc:397614,IL4R,39761…	http://amigo.geneontology.org/cgi-bin/amigo/term_details?term=GO:0016337
leukocyte aggregation	Biological Process	GO:0070486	24	117	1.82509e-05	0.00120623	ssc:100519177,GIMAP1,100519177:down|ssc:396927,ZP3,396927:up|ssc:100516458,TNFSF18,100516458:down|ssc:100127489,S100A9,100127489:down|ssc:100621675,-,100621675:down|ssc:397492,DPP4,397492:down|ssc:100153191,SIT1,100153191:up|ssc:445528,HLA-DMA,445528:down|ssc:100155958,SRF,100155958:down|ssc:100525094,SASH3,100525094:down|ssc:100516296,EGR3,100516296:down|ssc:100113425,BMP4,100113425:down|ssc:100…	http://amigo.geneontology.org/cgi-bin/amigo/term_details?term=GO:0070486
chemokine activity	Molecular Function	GO:0008009	10	26	1.92666e-05	0.00125863	ssc:396900,AMCF-II,396900:down|ssc:100621027,CX3CL1,100621027:down|ssc:494467,CXCL14,494467:down|ssc:100525528,-,100525528:down|ssc:100302703,CCL8,100302703:down|ssc:396880,-,396880:down|ssc:100525396,-,100525396:down|ssc:100524561,PPBP,100524561:down|ssc:414904,CXCL2,414904:down|ssc:100620730,-,100620730:down	http://amigo.geneontology.org/cgi-bin/amigo/term_details?term=GO:0008009
positive regulation of developmental process	Biological Process	GO:0051094	43	275	1.96964e-05	0.00125863	ssc:396927,ZP3,396927:up|ssc:100621027,CX3CL1,100621027:down|ssc:100622059,KCTD11,100622059:down|ssc:396628,VDR,396628:down|ssc:100152404,HEY2,100152404:down|ssc:780421,CMKLR1,780421:down|ssc:100521992,HCLS1,100521992:down|ssc:445528,HLA-DMA,445528:down|ssc:397620,FN1,397620:down|ssc:100627019,ABL2,100627019:down|ssc:100518125,YBX3,100518125:up|ssc:100152419,FRZB,100152419:up|ssc:654298,ID2,65429…	http://amigo.geneontology.org/cgi-bin/amigo/term_details?term=GO:0051094
regulation of intracellular signal transduction	Biological Process	GO:1902531	54	375	1.97003e-05	0.00125863	ssc:100270814,-,100270814:down|ssc:397122,IL1B1,397122:down|ssc:396927,ZP3,396927:up|ssc:100522873,EPHA2,100522873:down|ssc:396851,PIK3R5,396851:down|ssc:100523837,PRR5L,100523837:down|ssc:100127489,S100A9,100127489:down|ssc:100153460,AKAP5,100153460:down|ssc:100153176,SFRP5,100153176:down|ssc:100154195,-,100154195:down|ssc:780421,CMKLR1,780421:down|ssc:100521992,HCLS1,100521992:down|ssc:10015203…	http://amigo.geneontology.org/cgi-bin/amigo/term_details?term=GO:1902531
immune response-regulating signaling pathway	Biological Process	GO:0002764	17	68	2.14978e-05	0.00135838	ssc:399541,TLR4,399541:down|ssc:100627693,RAB7B,100627693:down|ssc:100627308,-,100627308:down|ssc:100154350,NFKBIL1,100154350:up|ssc:100516668,RABGEF1,100516668:down|ssc:100620216,-,100620216:down|ssc:100038025,CLEC7A,100038025:down|ssc:100627864,LAT2,100627864:down|ssc:397166,MS4A2,397166:down|ssc:100517988,-,100517988:down|ssc:100134969,NFATC2,100134969:down|ssc:396969,CTSH,396969:down|ssc:1005…	http://amigo.geneontology.org/cgi-bin/amigo/term_details?term=GO:0002764
ERK1 and ERK2 cascade	Biological Process	GO:0070371	16	62	2.44611e-05	0.00152882	ssc:100270814,-,100270814:down|ssc:100522873,EPHA2,100522873:down|ssc:100515612,C5AR2,100515612:down|ssc:100153791,CYR61,100153791:down|ssc:399503,LIF,399503:down|ssc:100625570,C3orf33,100625570:up|ssc:100525894,DUSP26,100525894:down|ssc:100113425,BMP4,100113425:down|ssc:100627019,ABL2,100627019:down|ssc:100517086,CSF1R,100517086:down|ssc:396865,CHI3L1,396865:down|ssc:414374,CCR1,414374:down|ssc:…	http://amigo.geneontology.org/cgi-bin/amigo/term_details?term=GO:0070371
receptor binding	Molecular Function	GO:0005102	60	435	2.54319e-05	0.00157227	ssc:397122,IL1B1,397122:down|ssc:396951,PTHLH,396951:up|ssc:100621027,CX3CL1,100621027:down|ssc:396628,VDR,396628:down|ssc:494467,CXCL14,494467:down|ssc:100127489,S100A9,100127489:down|ssc:397492,DPP4,397492:down|ssc:100154607,S1PR3,100154607:down|ssc:100048958,GNA14,100048958:down|ssc:100524561,PPBP,100524561:down|ssc:100152038,OSM,100152038:down|ssc:100156358,S100A4,100156358:down|ssc:397620,FN…	http://amigo.geneontology.org/cgi-bin/amigo/term_details?term=GO:0005102
immune system development	Biological Process	GO:0002520	38	234	2.57032e-05	0.00157227	ssc:100127155,LMO4,100127155:up|ssc:100522873,EPHA2,100522873:down|ssc:100521992,HCLS1,100521992:down|ssc:445528,HLA-DMA,445528:down|ssc:100622220,SLC25A38,100622220:up|ssc:397201,JAK2,397201:down|ssc:100627019,ABL2,100627019:down|ssc:100519098,SAMD9,100519098:down|ssc:654298,ID2,654298:down|ssc:100517086,CSF1R,100517086:down|ssc:100524095,PLD4,100524095:down|ssc:397246,VNN1,397246:up|ssc:397614,…	http://amigo.geneontology.org/cgi-bin/amigo/term_details?term=GO:0002520
homotypic cell-cell adhesion	Biological Process	GO:0034109	26	135	2.66046e-05	0.00161028	ssc:100519177,GIMAP1,100519177:down|ssc:396927,ZP3,396927:up|ssc:100516458,TNFSF18,100516458:down|ssc:100127489,S100A9,100127489:down|ssc:100621675,-,100621675:down|ssc:397492,DPP4,397492:down|ssc:100623651,DSC2,100623651:down|ssc:100153191,SIT1,100153191:up|ssc:445528,HLA-DMA,445528:down|ssc:100155958,SRF,100155958:down|ssc:100525094,SASH3,100525094:down|ssc:100516296,EGR3,100516296:down|ssc:100…	http://amigo.geneontology.org/cgi-bin/amigo/term_details?term=GO:0034109
regulation of signal transduction	Biological Process	GO:0009966	80	634	3.01081e-05	0.00180335	ssc:100270814,-,100270814:down|ssc:397122,IL1B1,397122:down|ssc:100522873,EPHA2,100522873:down|ssc:100621027,CX3CL1,100621027:down|ssc:396851,PIK3R5,396851:down|ssc:100622059,KCTD11,100622059:down|ssc:100152404,HEY2,100152404:down|ssc:100153460,AKAP5,100153460:down|ssc:100153176,SFRP5,100153176:down|ssc:100154195,-,100154195:down|ssc:780421,CMKLR1,780421:down|ssc:100152038,OSM,100152038:down|ssc:…	http://amigo.geneontology.org/cgi-bin/amigo/term_details?term=GO:0009966
positive regulation of cell proliferation	Biological Process	GO:0008284	33	193	3.05021e-05	0.00180365	ssc:396927,ZP3,396927:up|ssc:396951,PTHLH,396951:up|ssc:100152404,HEY2,100152404:down|ssc:100621675,-,100621675:down|ssc:397492,DPP4,397492:down|ssc:396665,-,396665:down|ssc:100521992,HCLS1,100521992:down|ssc:100152038,OSM,100152038:down|ssc:100154394,ROMO1,100154394:up|ssc:654298,ID2,654298:down|ssc:100517086,CSF1R,100517086:down|ssc:100156280,GREM1,100156280:down|ssc:100049663,EDN3,100049663:up…	http://amigo.geneontology.org/cgi-bin/amigo/term_details?term=GO:0008284
regulation of localization	Biological Process	GO:0032879	65	486	3.09033e-05	0.00180365	ssc:100522873,EPHA2,100522873:down|ssc:100621675,-,100621675:down|ssc:100153176,SFRP5,100153176:down|ssc:780421,CMKLR1,780421:down|ssc:100152038,OSM,100152038:down|ssc:100517086,CSF1R,100517086:down|ssc:100049663,EDN3,100049663:up|ssc:397614,IL4R,397614:down|ssc:100155367,RAP2A,100155367:down|ssc:100158013,FITM2,100158013:down|ssc:396900,AMCF-II,396900:down|ssc:100525528,-,100525528:down|ssc:1005…	http://amigo.geneontology.org/cgi-bin/amigo/term_details?term=GO:0032879
lymphocyte aggregation	Biological Process	GO:0071593	23	113	3.10541e-05	0.00180365	ssc:100519177,GIMAP1,100519177:down|ssc:396927,ZP3,396927:up|ssc:100516458,TNFSF18,100516458:down|ssc:100621675,-,100621675:down|ssc:397492,DPP4,397492:down|ssc:100153191,SIT1,100153191:up|ssc:445528,HLA-DMA,445528:down|ssc:100155958,SRF,100155958:down|ssc:100525094,SASH3,100525094:down|ssc:100516296,EGR3,100516296:down|ssc:100113425,BMP4,100113425:down|ssc:100038026,TNFSF13B,100038026:down|ssc:1…	http://amigo.geneontology.org/cgi-bin/amigo/term_details?term=GO:0071593
single-organism developmental process	Biological Process	GO:0044767	146	1335	3.21461e-05	0.0018484	ssc:100621027,CX3CL1,100621027:down|ssc:100622059,KCTD11,100622059:down|ssc:100624677,HNMT,100624677:down|ssc:100152404,HEY2,100152404:down|ssc:396665,-,396665:down|ssc:780421,CMKLR1,780421:down|ssc:100622220,SLC25A38,100622220:up|ssc:100521487,WEE1,100521487:down|ssc:100518612,MFSD2A,100518612:down|ssc:397620,FN1,397620:down|ssc:100519335,IFT57,100519335:up|ssc:100155795,MYLIP,100155795:up|ssc:1…	http://amigo.geneontology.org/cgi-bin/amigo/term_details?term=GO:0044767
positive regulation of protein metabolic process	Biological Process	GO:0051247	47	317	3.31724e-05	0.00188853	ssc:100270814,-,100270814:down|ssc:100524615,ARID5A,100524615:down|ssc:397122,IL1B1,397122:down|ssc:396927,ZP3,396927:up|ssc:396851,PIK3R5,396851:down|ssc:100523837,PRR5L,100523837:down|ssc:100127489,S100A9,100127489:down|ssc:100145894,JTB,100145894:up|ssc:100521992,HCLS1,100521992:down|ssc:100152038,OSM,100152038:down|ssc:100627352,FAM162A,100627352:up|ssc:100155895,ARRDC4,100155895:down|ssc:397…	http://amigo.geneontology.org/cgi-bin/amigo/term_details?term=GO:0051247
myeloid cell differentiation	Biological Process	GO:0030099	21	99	3.59376e-05	0.0020259	ssc:100627693,RAB7B,100627693:down|ssc:100522873,EPHA2,100522873:down|ssc:100514999,PIR,100514999:up|ssc:100521992,HCLS1,100521992:down|ssc:399503,LIF,399503:down|ssc:100155958,SRF,100155958:down|ssc:100622220,SLC25A38,100622220:up|ssc:100113425,BMP4,100113425:down|ssc:397201,JAK2,397201:down|ssc:100156161,TSPAN2,100156161:down|ssc:397649,LTF,397649:up|ssc:397093,INHBA,397093:down|ssc:100155631,F…	http://amigo.geneontology.org/cgi-bin/amigo/term_details?term=GO:0030099
regulation of biological quality	Biological Process	GO:0065008	92	761	3.8761e-05	0.00216384	ssc:100270814,-,100270814:down|ssc:100286778,PDK4,100286778:down|ssc:396724,OLR1,396724:down|ssc:397122,IL1B1,397122:down|ssc:100152404,HEY2,100152404:down|ssc:100152038,OSM,100152038:down|ssc:100622220,SLC25A38,100622220:up|ssc:396915,EDN1,396915:down|ssc:100144470,PHEROC,100144470:down|ssc:397620,FN1,397620:down|ssc:654298,ID2,654298:down|ssc:100155795,MYLIP,100155795:up|ssc:100517086,CSF1R,100…	http://amigo.geneontology.org/cgi-bin/amigo/term_details?term=GO:0065008
chemokine receptor binding	Molecular Function	GO:0042379	10	28	4.09763e-05	0.00226552	ssc:396900,AMCF-II,396900:down|ssc:100621027,CX3CL1,100621027:down|ssc:494467,CXCL14,494467:down|ssc:100525528,-,100525528:down|ssc:100302703,CCL8,100302703:down|ssc:396880,-,396880:down|ssc:100525396,-,100525396:down|ssc:100524561,PPBP,100524561:down|ssc:414904,CXCL2,414904:down|ssc:100620730,-,100620730:down	http://amigo.geneontology.org/cgi-bin/amigo/term_details?term=GO:0042379
epithelium development	Biological Process	GO:0060429	47	321	4.58888e-05	0.00251296	ssc:100127155,LMO4,100127155:up|ssc:100522873,EPHA2,100522873:down|ssc:396951,PTHLH,396951:up|ssc:396628,VDR,396628:down|ssc:100152404,HEY2,100152404:down|ssc:100154607,S1PR3,100154607:down|ssc:100153176,SFRP5,100153176:down|ssc:100157902,DNPH1,100157902:up|ssc:100622572,-,100622572:down|ssc:100519335,IFT57,100519335:up|ssc:100627019,ABL2,100627019:down|ssc:100152419,FRZB,100152419:up|ssc:1001550…	http://amigo.geneontology.org/cgi-bin/amigo/term_details?term=GO:0060429
extracellular space	Cellular Component	GO:0005615	54	388	5.19196e-05	0.00279477	ssc:100270814,-,100270814:down|ssc:397122,IL1B1,397122:down|ssc:396927,ZP3,396927:up|ssc:100127489,S100A9,100127489:down|ssc:100153176,SFRP5,100153176:down|ssc:100524561,PPBP,100524561:down|ssc:100152038,OSM,100152038:down|ssc:396806,BSP1,396806:up|ssc:100156358,S100A4,100156358:down|ssc:397620,FN1,397620:down|ssc:100152724,SELENBP1,100152724:up|ssc:100152419,FRZB,100152419:up|ssc:100154994,SERPI…	http://amigo.geneontology.org/cgi-bin/amigo/term_details?term=GO:0005615
cellular amide metabolic process	Biological Process	GO:0043603	15	59	5.29792e-05	0.00279477	ssc:100521480,GSTK1,100521480:up|ssc:100624445,-,100624445:down|ssc:397682,-,397682:up|ssc:100153791,CYR61,100153791:down|ssc:100156882,FURIN,100156882:down|ssc:397246,VNN1,397246:up|ssc:100153442,-,100153442:down|ssc:100153094,-,100153094:up|ssc:100522018,GCLC,100522018:down|ssc:396969,CTSH,396969:down|ssc:100511536,MME,100511536:down|ssc:100518796,SGMS2,100518796:down|ssc:100153960,NR1H4,100153…	http://amigo.geneontology.org/cgi-bin/amigo/term_details?term=GO:0043603
regulation of ERK1 and ERK2 cascade	Biological Process	GO:0070372	15	59	5.29792e-05	0.00279477	ssc:100270814,-,100270814:down|ssc:100522873,EPHA2,100522873:down|ssc:396865,CHI3L1,396865:down|ssc:100517086,CSF1R,100517086:down|ssc:100515612,C5AR2,100515612:down|ssc:414374,CCR1,414374:down|ssc:100153791,CYR61,100153791:down|ssc:100519703,F2RL1,100519703:down|ssc:397094,IL1A,397094:down|ssc:399503,LIF,399503:down|ssc:100625570,C3orf33,100625570:up|ssc:100525894,DUSP26,100525894:down|ssc:10011…	http://amigo.geneontology.org/cgi-bin/amigo/term_details?term=GO:0070372
regulation of behavior	Biological Process	GO:0050795	15	59	5.29792e-05	0.00279477	ssc:396900,AMCF-II,396900:down|ssc:100127483,BMPR2,100127483:down|ssc:100525528,-,100525528:down|ssc:100621675,-,100621675:down|ssc:100515612,C5AR2,100515612:down|ssc:414374,CCR1,414374:down|ssc:396880,-,396880:down|ssc:100049663,EDN3,100049663:up|ssc:100525396,-,100525396:down|ssc:100524561,PPBP,100524561:down|ssc:414372,CCR2,414372:down|ssc:780421,CMKLR1,780421:down|ssc:100519703,F2RL1,10051970…	http://amigo.geneontology.org/cgi-bin/amigo/term_details?term=GO:0050795
cytokine activity	Molecular Function	GO:0005125	23	117	5.53489e-05	0.00289324	ssc:396900,AMCF-II,396900:down|ssc:397122,IL1B1,397122:down|ssc:100621027,CX3CL1,100621027:down|ssc:100516458,TNFSF18,100516458:down|ssc:494467,CXCL14,494467:down|ssc:100525528,-,100525528:down|ssc:100524561,PPBP,100524561:down|ssc:414904,CXCL2,414904:down|ssc:595123,NAMPT,595123:up|ssc:100152038,OSM,100152038:down|ssc:399503,LIF,399503:down|ssc:100113425,BMP4,100113425:down|ssc:100038026,TNFSF13…	http://amigo.geneontology.org/cgi-bin/amigo/term_details?term=GO:0005125
phosphorus metabolic process	Biological Process	GO:0006793	94	789	5.60772e-05	0.0029049	ssc:100270814,-,100270814:down|ssc:100286778,PDK4,100286778:down|ssc:397122,IL1B1,397122:down|ssc:100522873,EPHA2,100522873:down|ssc:396851,PIK3R5,396851:down|ssc:100153460,AKAP5,100153460:down|ssc:396665,-,396665:down|ssc:100153176,SFRP5,100153176:down|ssc:100145894,JTB,100145894:up|ssc:100152038,OSM,100152038:down|ssc:100521487,WEE1,100521487:down|ssc:100144523,PMEPA1,100144523:down|ssc:1001579…	http://amigo.geneontology.org/cgi-bin/amigo/term_details?term=GO:0006793
response to molecule of bacterial origin	Biological Process	GO:0002237	17	73	5.75326e-05	0.00295368	ssc:399541,TLR4,399541:down|ssc:396900,AMCF-II,396900:down|ssc:100525528,-,100525528:down|ssc:100154350,NFKBIL1,100154350:up|ssc:100524561,PPBP,100524561:down|ssc:100513746,NOCT,100513746:down|ssc:414371,CCR5,414371:down|ssc:100620216,-,100620216:down|ssc:100127164,PTGER2,100127164:down|ssc:397649,LTF,397649:up|ssc:100525396,-,100525396:down|ssc:396880,-,396880:down|ssc:654297,CITED1,654297:up|ss…	http://amigo.geneontology.org/cgi-bin/amigo/term_details?term=GO:0002237
cell differentiation	Biological Process	GO:0030154	100	853	5.96205e-05	0.00303379	ssc:100127155,LMO4,100127155:up|ssc:100522873,EPHA2,100522873:down|ssc:100622059,KCTD11,100622059:down|ssc:494467,CXCL14,494467:down|ssc:100152404,HEY2,100152404:down|ssc:100154607,S1PR3,100154607:down|ssc:396665,-,396665:down|ssc:780421,CMKLR1,780421:down|ssc:445528,HLA-DMA,445528:down|ssc:100622220,SLC25A38,100622220:up|ssc:100521487,WEE1,100521487:down|ssc:100157902,DNPH1,100157902:up|ssc:1005…	http://amigo.geneontology.org/cgi-bin/amigo/term_details?term=GO:0030154
regulation of myeloid leukocyte mediated immunity	Biological Process	GO:0002886	5	7	6.50284e-05	0.00327994	ssc:100516668,RABGEF1,100516668:down|ssc:396900,AMCF-II,396900:down|ssc:100519703,F2RL1,100519703:down|ssc:100155631,FES,100155631:down|ssc:397406,FCER1G,397406:down	http://amigo.geneontology.org/cgi-bin/amigo/term_details?term=GO:0002886
positive regulation of cellular protein metabolic process	Biological Process	GO:0032270	44	298	6.60387e-05	0.00330193	ssc:100270814,-,100270814:down|ssc:100524615,ARID5A,100524615:down|ssc:397122,IL1B1,397122:down|ssc:396927,ZP3,396927:up|ssc:396851,PIK3R5,396851:down|ssc:100523837,PRR5L,100523837:down|ssc:100127489,S100A9,100127489:down|ssc:100145894,JTB,100145894:up|ssc:100521992,HCLS1,100521992:down|ssc:100152038,OSM,100152038:down|ssc:100627352,FAM162A,100627352:up|ssc:100155895,ARRDC4,100155895:down|ssc:397…	http://amigo.geneontology.org/cgi-bin/amigo/term_details?term=GO:0032270
cytokine secretion	Biological Process	GO:0050663	12	41	6.73758e-05	0.00333975	ssc:399541,TLR4,399541:down|ssc:396865,CHI3L1,396865:down|ssc:100517086,CSF1R,100517086:down|ssc:100515612,C5AR2,100515612:down|ssc:100516668,RABGEF1,100516668:down|ssc:397614,IL4R,397614:down|ssc:397094,IL1A,397094:down|ssc:100519703,F2RL1,100519703:down|ssc:397106,IL10,397106:down|ssc:396623,TLR2,396623:down|ssc:100621544,RNF19B,100621544:down|ssc:100627019,ABL2,100627019:down	http://amigo.geneontology.org/cgi-bin/amigo/term_details?term=GO:0050663
regulation of hemopoiesis	Biological Process	GO:1903706	17	74	6.91629e-05	0.00339903	ssc:100627693,RAB7B,100627693:down|ssc:100521992,HCLS1,100521992:down|ssc:399503,LIF,399503:down|ssc:445528,HLA-DMA,445528:down|ssc:100525094,SASH3,100525094:down|ssc:100516296,EGR3,100516296:down|ssc:100113425,BMP4,100113425:down|ssc:397649,LTF,397649:up|ssc:397093,INHBA,397093:down|ssc:100155631,FES,100155631:down|ssc:654298,ID2,654298:down|ssc:414374,CCR1,414374:down|ssc:397246,VNN1,397246:up|…	http://amigo.geneontology.org/cgi-bin/amigo/term_details?term=GO:1903706
regulation of ossification	Biological Process	GO:0030278	14	54	7.44353e-05	0.00362715	ssc:100516027,SFRP2,100516027:down|ssc:397649,LTF,397649:up|ssc:100127483,BMPR2,100127483:down|ssc:654298,ID2,654298:down|ssc:100516663,CREB3L1,100516663:down|ssc:100038004,EGR2,100038004:down|ssc:100156280,GREM1,100156280:down|ssc:100624458,ANKH,100624458:down|ssc:414374,CCR1,414374:down|ssc:100153791,CYR61,100153791:down|ssc:654297,CITED1,654297:up|ssc:100513746,NOCT,100513746:down|ssc:10052283…	http://amigo.geneontology.org/cgi-bin/amigo/term_details?term=GO:0030278
organ development	Biological Process	GO:0048513	94	795	7.53632e-05	0.0036415	ssc:100127155,LMO4,100127155:up|ssc:100522873,EPHA2,100522873:down|ssc:494467,CXCL14,494467:down|ssc:100624677,HNMT,100624677:down|ssc:100152404,HEY2,100152404:down|ssc:396665,-,396665:down|ssc:100153176,SFRP5,100153176:down|ssc:445528,HLA-DMA,445528:down|ssc:100622220,SLC25A38,100622220:up|ssc:100519335,IFT57,100519335:up|ssc:654298,ID2,654298:down|ssc:100517086,CSF1R,100517086:down|ssc:10003800…	http://amigo.geneontology.org/cgi-bin/amigo/term_details?term=GO:0048513
regulation of multicellular organismal development	Biological Process	GO:2000026	53	384	7.67004e-05	0.00367523	ssc:396927,ZP3,396927:up|ssc:100522873,EPHA2,100522873:down|ssc:396951,PTHLH,396951:up|ssc:100621027,CX3CL1,100621027:down|ssc:100622059,KCTD11,100622059:down|ssc:396628,VDR,396628:down|ssc:100152404,HEY2,100152404:down|ssc:100154607,S1PR3,100154607:down|ssc:396665,-,396665:down|ssc:100153176,SFRP5,100153176:down|ssc:100521992,HCLS1,100521992:down|ssc:445528,HLA-DMA,445528:down|ssc:397620,FN1,397…	http://amigo.geneontology.org/cgi-bin/amigo/term_details?term=GO:2000026
T cell activation	Biological Process	GO:0042110	22	112	8.11027e-05	0.00382246	ssc:100519177,GIMAP1,100519177:down|ssc:396927,ZP3,396927:up|ssc:100516458,TNFSF18,100516458:down|ssc:397492,DPP4,397492:down|ssc:100153191,SIT1,100153191:up|ssc:445528,HLA-DMA,445528:down|ssc:100155958,SRF,100155958:down|ssc:100525094,SASH3,100525094:down|ssc:100516296,EGR3,100516296:down|ssc:100113425,BMP4,100113425:down|ssc:100038026,TNFSF13B,100038026:down|ssc:100627019,ABL2,100627019:down|ss…	http://amigo.geneontology.org/cgi-bin/amigo/term_details?term=GO:0042110
T cell aggregation	Biological Process	GO:0070489	22	112	8.11027e-05	0.00382246	ssc:100519177,GIMAP1,100519177:down|ssc:396927,ZP3,396927:up|ssc:100516458,TNFSF18,100516458:down|ssc:397492,DPP4,397492:down|ssc:100153191,SIT1,100153191:up|ssc:445528,HLA-DMA,445528:down|ssc:100155958,SRF,100155958:down|ssc:100525094,SASH3,100525094:down|ssc:100516296,EGR3,100516296:down|ssc:100113425,BMP4,100113425:down|ssc:100038026,TNFSF13B,100038026:down|ssc:100627019,ABL2,100627019:down|ss…	http://amigo.geneontology.org/cgi-bin/amigo/term_details?term=GO:0070489
regulation of protein phosphorylation	Biological Process	GO:0001932	45	310	8.26883e-05	0.00383185	ssc:100270814,-,100270814:down|ssc:397122,IL1B1,397122:down|ssc:396927,ZP3,396927:up|ssc:100522873,EPHA2,100522873:down|ssc:396851,PIK3R5,396851:down|ssc:100523837,PRR5L,100523837:down|ssc:100153176,SFRP5,100153176:down|ssc:100145894,JTB,100145894:up|ssc:100521992,HCLS1,100521992:down|ssc:100152038,OSM,100152038:down|ssc:100144523,PMEPA1,100144523:down|ssc:397201,JAK2,397201:down|ssc:100627019,AB…	http://amigo.geneontology.org/cgi-bin/amigo/term_details?term=GO:0001932
secretion by cell	Biological Process	GO:0032940	32	194	8.28195e-05	0.00383185	ssc:399541,TLR4,399541:down|ssc:396927,ZP3,396927:up|ssc:100524561,PPBP,100524561:down|ssc:100152038,OSM,100152038:down|ssc:100627019,ABL2,100627019:down|ssc:100517086,CSF1R,100517086:down|ssc:100152253,STX11,100152253:down|ssc:100049663,EDN3,100049663:up|ssc:100156882,FURIN,100156882:down|ssc:397614,IL4R,397614:down|ssc:397094,IL1A,397094:down|ssc:100522131,FKBP1B,100522131:down|ssc:100518141,C2…	http://amigo.geneontology.org/cgi-bin/amigo/term_details?term=GO:0032940
leukocyte differentiation	Biological Process	GO:0002521	23	120	8.35383e-05	0.00383185	ssc:100519177,GIMAP1,100519177:down|ssc:100522873,EPHA2,100522873:down|ssc:100514999,PIR,100514999:up|ssc:100521992,HCLS1,100521992:down|ssc:399503,LIF,399503:down|ssc:445528,HLA-DMA,445528:down|ssc:100155958,SRF,100155958:down|ssc:100525094,SASH3,100525094:down|ssc:100516296,EGR3,100516296:down|ssc:100113425,BMP4,100113425:down|ssc:100156161,TSPAN2,100156161:down|ssc:100627019,ABL2,100627019:dow…	http://amigo.geneontology.org/cgi-bin/amigo/term_details?term=GO:0002521
ossification	Biological Process	GO:0001503	20	97	8.39675e-05	0.00383185	ssc:100522873,EPHA2,100522873:down|ssc:396951,PTHLH,396951:up|ssc:100127483,BMPR2,100127483:down|ssc:100153791,CYR61,100153791:down|ssc:100152247,TP53INP2,100152247:down|ssc:100513746,NOCT,100513746:down|ssc:100113425,BMP4,100113425:down|ssc:100516027,SFRP2,100516027:down|ssc:397649,LTF,397649:up|ssc:397137,IBSP,397137:down|ssc:100620511,CLEC3B,100620511:up|ssc:654298,ID2,654298:down|ssc:10015628…	http://amigo.geneontology.org/cgi-bin/amigo/term_details?term=GO:0001503
cellular developmental process	Biological Process	GO:0048869	105	914	8.71048e-05	0.00394372	ssc:100127155,LMO4,100127155:up|ssc:100522873,EPHA2,100522873:down|ssc:100622059,KCTD11,100622059:down|ssc:494467,CXCL14,494467:down|ssc:100152404,HEY2,100152404:down|ssc:100154607,S1PR3,100154607:down|ssc:396665,-,396665:down|ssc:780421,CMKLR1,780421:down|ssc:445528,HLA-DMA,445528:down|ssc:100622220,SLC25A38,100622220:up|ssc:100521487,WEE1,100521487:down|ssc:100157902,DNPH1,100157902:up|ssc:1005…	http://amigo.geneontology.org/cgi-bin/amigo/term_details?term=GO:0048869
immune response-activating signal transduction	Biological Process	GO:0002757	15	62	9.82284e-05	0.00441261	ssc:399541,TLR4,399541:down|ssc:100627693,RAB7B,100627693:down|ssc:100038025,CLEC7A,100038025:down|ssc:100627864,LAT2,100627864:down|ssc:100627308,-,100627308:down|ssc:100517988,-,100517988:down|ssc:100154350,NFKBIL1,100154350:up|ssc:100134969,NFATC2,100134969:down|ssc:100516668,RABGEF1,100516668:down|ssc:100519703,F2RL1,100519703:down|ssc:100620216,-,100620216:down|ssc:397406,FCER1G,397406:down|…	http://amigo.geneontology.org/cgi-bin/amigo/term_details?term=GO:0002757
phosphate-containing compound metabolic process	Biological Process	GO:0006796	92	780	0.000100286	0.00447012	ssc:100270814,-,100270814:down|ssc:100286778,PDK4,100286778:down|ssc:397122,IL1B1,397122:down|ssc:100522873,EPHA2,100522873:down|ssc:396851,PIK3R5,396851:down|ssc:100153460,AKAP5,100153460:down|ssc:396665,-,396665:down|ssc:100153176,SFRP5,100153176:down|ssc:100145894,JTB,100145894:up|ssc:100152038,OSM,100152038:down|ssc:100521487,WEE1,100521487:down|ssc:100144523,PMEPA1,100144523:down|ssc:1001579…	http://amigo.geneontology.org/cgi-bin/amigo/term_details?term=GO:0006796
tissue development	Biological Process	GO:0009888	64	495	0.000101208	0.00447653	ssc:100127155,LMO4,100127155:up|ssc:100522873,EPHA2,100522873:down|ssc:100152404,HEY2,100152404:down|ssc:100154607,S1PR3,100154607:down|ssc:396665,-,396665:down|ssc:100153176,SFRP5,100153176:down|ssc:100157902,DNPH1,100157902:up|ssc:397620,FN1,397620:down|ssc:100519335,IFT57,100519335:up|ssc:100522360,-,100522360:down|ssc:654298,ID2,654298:down|ssc:100038004,EGR2,100038004:down|ssc:100624458,ANKH…	http://amigo.geneontology.org/cgi-bin/amigo/term_details?term=GO:0009888
side of membrane	Cellular Component	GO:0098552	19	91	0.000105425	0.00457999	ssc:100627308,-,100627308:down|ssc:100048958,GNA14,100048958:down|ssc:414371,CCR5,414371:down|ssc:100627019,ABL2,100627019:down|ssc:397063,ITGB3,397063:down|ssc:404772,GEM,404772:down|ssc:100155091,ITGA5,100155091:down|ssc:100155631,FES,100155631:down|ssc:397166,MS4A2,397166:down|ssc:733670,RGS2,733670:up|ssc:396853,-,396853:up|ssc:100517988,-,100517988:down|ssc:414374,CCR1,414374:down|ssc:100127…	http://amigo.geneontology.org/cgi-bin/amigo/term_details?term=GO:0098552
cytokine production	Biological Process	GO:0001816	26	146	0.000106603	0.00457999	ssc:399541,TLR4,399541:down|ssc:100627693,RAB7B,100627693:down|ssc:396900,AMCF-II,396900:down|ssc:396927,ZP3,396927:up|ssc:100621027,CX3CL1,100621027:down|ssc:100154607,S1PR3,100154607:down|ssc:100515612,C5AR2,100515612:down|ssc:100154350,NFKBIL1,100154350:up|ssc:100516668,RABGEF1,100516668:down|ssc:780421,CMKLR1,780421:down|ssc:100525094,SASH3,100525094:down|ssc:100620216,-,100620216:down|ssc:10…	http://amigo.geneontology.org/cgi-bin/amigo/term_details?term=GO:0001816
lymphocyte activation	Biological Process	GO:0046649	26	146	0.000106603	0.00457999	ssc:100519177,GIMAP1,100519177:down|ssc:396927,ZP3,396927:up|ssc:100516458,TNFSF18,100516458:down|ssc:397492,DPP4,397492:down|ssc:100153191,SIT1,100153191:up|ssc:445528,HLA-DMA,445528:down|ssc:100155958,SRF,100155958:down|ssc:100525094,SASH3,100525094:down|ssc:100516296,EGR3,100516296:down|ssc:100113425,BMP4,100113425:down|ssc:100038026,TNFSF13B,100038026:down|ssc:100627019,ABL2,100627019:down|ss…	http://amigo.geneontology.org/cgi-bin/amigo/term_details?term=GO:0046649
membrane-bounded vesicle	Cellular Component	GO:0031988	104	908	0.000107293	0.00457999	ssc:497237,SCG2,497237:down|ssc:100739619,NDUFB1,100739619:up|ssc:100624677,HNMT,100624677:down|ssc:100621675,-,100621675:down|ssc:397492,DPP4,397492:down|ssc:100519675,RPL35A,100519675:up|ssc:445528,HLA-DMA,445528:down|ssc:100524550,VPS37D,100524550:up|ssc:100157902,DNPH1,100157902:up|ssc:100627480,TFF3,100627480:up|ssc:397620,FN1,397620:down|ssc:100270722,ARF5,100270722:up|ssc:100522360,-,10052…	http://amigo.geneontology.org/cgi-bin/amigo/term_details?term=GO:0031988
positive regulation of protein phosphorylation	Biological Process	GO:0001934	31	188	0.00010753	0.00457999	ssc:100270814,-,100270814:down|ssc:397122,IL1B1,397122:down|ssc:396927,ZP3,396927:up|ssc:396851,PIK3R5,396851:down|ssc:100523837,PRR5L,100523837:down|ssc:100127483,BMPR2,100127483:down|ssc:100515612,C5AR2,100515612:down|ssc:397495,BDNF,397495:down|ssc:100145894,JTB,100145894:up|ssc:100153791,CYR61,100153791:down|ssc:100521992,HCLS1,100521992:down|ssc:100152038,OSM,100152038:down|ssc:399503,LIF,39…	http://amigo.geneontology.org/cgi-bin/amigo/term_details?term=GO:0001934
system development	Biological Process	GO:0048731	113	1006	0.000115308	0.00485285	ssc:100127155,LMO4,100127155:up|ssc:100621457,-,100621457:down|ssc:100522873,EPHA2,100522873:down|ssc:100621027,CX3CL1,100621027:down|ssc:100622059,KCTD11,100622059:down|ssc:494467,CXCL14,494467:down|ssc:100624677,HNMT,100624677:down|ssc:100152404,HEY2,100152404:down|ssc:396665,-,396665:down|ssc:100153176,SFRP5,100153176:down|ssc:100152038,OSM,100152038:down|ssc:445528,HLA-DMA,445528:down|ssc:100…	http://amigo.geneontology.org/cgi-bin/amigo/term_details?term=GO:0048731
vesicle	Cellular Component	GO:0031982	106	931	0.000115624	0.00485285	ssc:497237,SCG2,497237:down|ssc:100739619,NDUFB1,100739619:up|ssc:100624677,HNMT,100624677:down|ssc:100621675,-,100621675:down|ssc:397492,DPP4,397492:down|ssc:100519675,RPL35A,100519675:up|ssc:445528,HLA-DMA,445528:down|ssc:100524550,VPS37D,100524550:up|ssc:100157902,DNPH1,100157902:up|ssc:100627480,TFF3,100627480:up|ssc:397620,FN1,397620:down|ssc:100270722,ARF5,100270722:up|ssc:100522360,-,10052…	http://amigo.geneontology.org/cgi-bin/amigo/term_details?term=GO:0031982
enzyme linked receptor protein signaling pathway	Biological Process	GO:0007167	34	215	0.000118327	0.00489864	ssc:100286778,PDK4,100286778:down|ssc:100522873,EPHA2,100522873:down|ssc:100627308,-,100627308:down|ssc:396665,-,396665:down|ssc:100144523,PMEPA1,100144523:down|ssc:397201,JAK2,397201:down|ssc:100627019,ABL2,100627019:down|ssc:100517086,CSF1R,100517086:down|ssc:100156280,GREM1,100156280:down|ssc:100517990,ZCCHC12,100517990:down|ssc:100519275,CSRNP1,100519275:down|ssc:100512012,WFIKKN2,100512012:u…	http://amigo.geneontology.org/cgi-bin/amigo/term_details?term=GO:0007167
leukocyte mediated immunity	Biological Process	GO:0002443	15	63	0.000119436	0.00489864	ssc:396900,AMCF-II,396900:down|ssc:396927,ZP3,396927:up|ssc:100155631,FES,100155631:down|ssc:100511161,PLA2G3,100511161:down|ssc:100522387,CTSC,100522387:up|ssc:100152253,STX11,100152253:down|ssc:100524561,PPBP,100524561:down|ssc:100516668,RABGEF1,100516668:down|ssc:100519703,F2RL1,100519703:down|ssc:445528,HLA-DMA,445528:down|ssc:396969,CTSH,396969:down|ssc:100525094,SASH3,100525094:down|ssc:100…	http://amigo.geneontology.org/cgi-bin/amigo/term_details?term=GO:0002443
regulation of MAPK cascade	Biological Process	GO:0043408	29	172	0.000119566	0.00489864	ssc:100270814,-,100270814:down|ssc:397122,IL1B1,397122:down|ssc:100522873,EPHA2,100522873:down|ssc:396851,PIK3R5,396851:down|ssc:100515612,C5AR2,100515612:down|ssc:100153176,SFRP5,100153176:down|ssc:100153791,CYR61,100153791:down|ssc:100152038,OSM,100152038:down|ssc:399503,LIF,399503:down|ssc:100625570,C3orf33,100625570:up|ssc:100525894,DUSP26,100525894:down|ssc:100113425,BMP4,100113425:down|ssc:…	http://amigo.geneontology.org/cgi-bin/amigo/term_details?term=GO:0043408
response to lipopolysaccharide	Biological Process	GO:0032496	16	70	0.000120123	0.00489864	ssc:399541,TLR4,399541:down|ssc:396900,AMCF-II,396900:down|ssc:100525528,-,100525528:down|ssc:100154350,NFKBIL1,100154350:up|ssc:100524561,PPBP,100524561:down|ssc:100513746,NOCT,100513746:down|ssc:414371,CCR5,414371:down|ssc:100620216,-,100620216:down|ssc:100127164,PTGER2,100127164:down|ssc:397649,LTF,397649:up|ssc:100525396,-,100525396:down|ssc:396880,-,396880:down|ssc:654297,CITED1,654297:up|ss…	http://amigo.geneontology.org/cgi-bin/amigo/term_details?term=GO:0032496
anatomical structure development	Biological Process	GO:0048856	134	1237	0.000125363	0.00507631	ssc:100621027,CX3CL1,100621027:down|ssc:100622059,KCTD11,100622059:down|ssc:100624677,HNMT,100624677:down|ssc:100152404,HEY2,100152404:down|ssc:396665,-,396665:down|ssc:100622220,SLC25A38,100622220:up|ssc:100521487,WEE1,100521487:down|ssc:100518612,MFSD2A,100518612:down|ssc:397620,FN1,397620:down|ssc:100519335,IFT57,100519335:up|ssc:100522360,-,100522360:down|ssc:100155795,MYLIP,100155795:up|ssc:…	http://amigo.geneontology.org/cgi-bin/amigo/term_details?term=GO:0048856
positive regulation of metabolic process	Biological Process	GO:0009893	91	775	0.000130277	0.00523843	ssc:100270814,-,100270814:down|ssc:100127155,LMO4,100127155:up|ssc:396724,OLR1,396724:down|ssc:397122,IL1B1,397122:down|ssc:396851,PIK3R5,396851:down|ssc:100152404,HEY2,100152404:down|ssc:100153460,AKAP5,100153460:down|ssc:396665,-,396665:down|ssc:100145894,JTB,100145894:up|ssc:100154195,-,100154195:down|ssc:100152038,OSM,100152038:down|ssc:100155895,ARRDC4,100155895:down|ssc:397620,FN1,397620:do…	http://amigo.geneontology.org/cgi-bin/amigo/term_details?term=GO:0009893
regulation of immune response	Biological Process	GO:0050776	25	140	0.000137872	0.00547849	ssc:399541,TLR4,399541:down|ssc:100627693,RAB7B,100627693:down|ssc:396927,ZP3,396927:up|ssc:100627308,-,100627308:down|ssc:100154350,NFKBIL1,100154350:up|ssc:100516668,RABGEF1,100516668:down|ssc:445528,HLA-DMA,445528:down|ssc:100525094,SASH3,100525094:down|ssc:100620216,-,100620216:down|ssc:100038026,TNFSF13B,100038026:down|ssc:100038025,CLEC7A,100038025:down|ssc:100627864,LAT2,100627864:down|ssc…	http://amigo.geneontology.org/cgi-bin/amigo/term_details?term=GO:0050776
regulated secretory pathway	Biological Process	GO:0045055	7	16	0.000138153	0.00547849	ssc:100516668,RABGEF1,100516668:down|ssc:100519703,F2RL1,100519703:down|ssc:100155631,FES,100155631:down|ssc:100511161,PLA2G3,100511161:down|ssc:397406,FCER1G,397406:down|ssc:100152253,STX11,100152253:down|ssc:100524561,PPBP,100524561:down	http://amigo.geneontology.org/cgi-bin/amigo/term_details?term=GO:0045055
MAPK cascade	Biological Process	GO:0000165	31	191	0.000145238	0.00571999	ssc:100270814,-,100270814:down|ssc:397122,IL1B1,397122:down|ssc:100522873,EPHA2,100522873:down|ssc:396851,PIK3R5,396851:down|ssc:100515612,C5AR2,100515612:down|ssc:100153176,SFRP5,100153176:down|ssc:100153791,CYR61,100153791:down|ssc:100152038,OSM,100152038:down|ssc:399503,LIF,399503:down|ssc:414371,CCR5,414371:down|ssc:100625570,C3orf33,100625570:up|ssc:100525894,DUSP26,100525894:down|ssc:100113…	http://amigo.geneontology.org/cgi-bin/amigo/term_details?term=GO:0000165
negative regulation of cell communication	Biological Process	GO:0010648	40	272	0.000155825	0.00609521	ssc:100522873,EPHA2,100522873:down|ssc:100621027,CX3CL1,100621027:down|ssc:100622059,KCTD11,100622059:down|ssc:100152404,HEY2,100152404:down|ssc:100153176,SFRP5,100153176:down|ssc:100152038,OSM,100152038:down|ssc:100144523,PMEPA1,100144523:down|ssc:100627019,ABL2,100627019:down|ssc:100518125,YBX3,100518125:up|ssc:100152419,FRZB,100152419:up|ssc:100525762,DDIT4L,100525762:down|ssc:733670,RGS2,7336…	http://amigo.geneontology.org/cgi-bin/amigo/term_details?term=GO:0010648
negative regulation of signaling	Biological Process	GO:0023057	40	273	0.000168867	0.00653193	ssc:100522873,EPHA2,100522873:down|ssc:100621027,CX3CL1,100621027:down|ssc:100622059,KCTD11,100622059:down|ssc:100152404,HEY2,100152404:down|ssc:100153176,SFRP5,100153176:down|ssc:100152038,OSM,100152038:down|ssc:100144523,PMEPA1,100144523:down|ssc:100627019,ABL2,100627019:down|ssc:100518125,YBX3,100518125:up|ssc:100152419,FRZB,100152419:up|ssc:100525762,DDIT4L,100525762:down|ssc:733670,RGS2,7336…	http://amigo.geneontology.org/cgi-bin/amigo/term_details?term=GO:0023057
regulation of phosphorus metabolic process	Biological Process	GO:0051174	52	386	0.000169262	0.00653193	ssc:100270814,-,100270814:down|ssc:100286778,PDK4,100286778:down|ssc:397122,IL1B1,397122:down|ssc:396927,ZP3,396927:up|ssc:100522873,EPHA2,100522873:down|ssc:396951,PTHLH,396951:up|ssc:396851,PIK3R5,396851:down|ssc:100523837,PRR5L,100523837:down|ssc:100153460,AKAP5,100153460:down|ssc:100153176,SFRP5,100153176:down|ssc:100145894,JTB,100145894:up|ssc:100514958,SLAMF8,100514958:down|ssc:100521992,HC…	http://amigo.geneontology.org/cgi-bin/amigo/term_details?term=GO:0051174
CXCR chemokine receptor binding	Molecular Function	GO:0045236	6	12	0.000173315	0.00664375	ssc:396900,AMCF-II,396900:down|ssc:100525528,-,100525528:down|ssc:100620730,-,100620730:down|ssc:396880,-,396880:down|ssc:100525396,-,100525396:down|ssc:100524561,PPBP,100524561:down	http://amigo.geneontology.org/cgi-bin/amigo/term_details?term=GO:0045236
behavior	Biological Process	GO:0007610	29	176	0.000181182	0.0068993	ssc:396900,AMCF-II,396900:down|ssc:100127483,BMPR2,100127483:down|ssc:100525528,-,100525528:down|ssc:100623510,S100B,100623510:up|ssc:100621675,-,100621675:down|ssc:100515612,C5AR2,100515612:down|ssc:397495,BDNF,397495:down|ssc:100524561,PPBP,100524561:down|ssc:414372,CCR2,414372:down|ssc:780421,CMKLR1,780421:down|ssc:100152038,OSM,100152038:down|ssc:100155958,SRF,100155958:down|ssc:397547,NPY1R,…	http://amigo.geneontology.org/cgi-bin/amigo/term_details?term=GO:0007610
positive regulation of multicellular organismal process	Biological Process	GO:0051240	45	321	0.000189904	0.00718389	ssc:396927,ZP3,396927:up|ssc:100621027,CX3CL1,100621027:down|ssc:100622059,KCTD11,100622059:down|ssc:396628,VDR,396628:down|ssc:100152404,HEY2,100152404:down|ssc:100521992,HCLS1,100521992:down|ssc:445528,HLA-DMA,445528:down|ssc:100620216,-,100620216:down|ssc:397620,FN1,397620:down|ssc:100627019,ABL2,100627019:down|ssc:100518125,YBX3,100518125:up|ssc:654298,ID2,654298:down|ssc:733670,RGS2,733670:u…	http://amigo.geneontology.org/cgi-bin/amigo/term_details?term=GO:0051240
steroid biosynthetic process	Biological Process	GO:0006694	11	39	0.000195471	0.00734612	ssc:100312968,EBP,100312968:up|ssc:100147712,HSD17B1,100147712:down|ssc:494015,SCAP,494015:up|ssc:396628,VDR,396628:down|ssc:100169702,PROX1,100169702:down|ssc:397497,FGF1,397497:down|ssc:100153960,NR1H4,100153960:up|ssc:100152963,PEX2,100152963:up|ssc:403330,CYP17A1,403330:down|ssc:100144446,HMGCR,100144446:up|ssc:397680,NR0B1,397680:up	http://amigo.geneontology.org/cgi-bin/amigo/term_details?term=GO:0006694
ameboidal-type cell migration	Biological Process	GO:0001667	16	73	0.000202912	0.00742784	ssc:100522873,EPHA2,100522873:down|ssc:100523837,PRR5L,100523837:down|ssc:100127483,BMPR2,100127483:down|ssc:397492,DPP4,397492:down|ssc:100511141,VASH1,100511141:down|ssc:397564,HBEGF,397564:down|ssc:100622249,ARID5B,100622249:down|ssc:100155958,SRF,100155958:down|ssc:100516296,EGR3,100516296:down|ssc:100113425,BMP4,100113425:down|ssc:100169702,PROX1,100169702:down|ssc:100156280,GREM1,100156280:…	http://amigo.geneontology.org/cgi-bin/amigo/term_details?term=GO:0001667
regulation of anatomical structure morphogenesis	Biological Process	GO:0022603	34	221	0.00020447	0.00742784	ssc:100522873,EPHA2,100522873:down|ssc:100621027,CX3CL1,100621027:down|ssc:396628,VDR,396628:down|ssc:100152404,HEY2,100152404:down|ssc:396665,-,396665:down|ssc:100153176,SFRP5,100153176:down|ssc:397620,FN1,397620:down|ssc:654413,PALMD,654413:down|ssc:100627019,ABL2,100627019:down|ssc:100520585,FMNL1,100520585:down|ssc:100517086,CSF1R,100517086:down|ssc:100156280,GREM1,100156280:down|ssc:10015599…	http://amigo.geneontology.org/cgi-bin/amigo/term_details?term=GO:0022603
regulation of Wnt signaling pathway, planar cell polarity pathway	Biological Process	GO:2000095	4	5	0.000205396	0.00742784	ssc:100516027,SFRP2,100516027:down|ssc:100519746,DAB2,100519746:down|ssc:100627019,ABL2,100627019:down|ssc:100153176,SFRP5,100153176:down	http://amigo.geneontology.org/cgi-bin/amigo/term_details?term=GO:2000095
neutrophil activation involved in immune response	Biological Process	GO:0002283	4	5	0.000205396	0.00742784	ssc:397405,TYROBP,397405:down|ssc:397406,FCER1G,397406:down|ssc:100152253,STX11,100152253:down|ssc:100524561,PPBP,100524561:down	http://amigo.geneontology.org/cgi-bin/amigo/term_details?term=GO:0002283
regulation of leukocyte degranulation	Biological Process	GO:0043300	4	5	0.000205396	0.00742784	ssc:100516668,RABGEF1,100516668:down|ssc:100519703,F2RL1,100519703:down|ssc:100155631,FES,100155631:down|ssc:397406,FCER1G,397406:down	http://amigo.geneontology.org/cgi-bin/amigo/term_details?term=GO:0043300
regulation of non-canonical Wnt signaling pathway	Biological Process	GO:2000050	4	5	0.000205396	0.00742784	ssc:100516027,SFRP2,100516027:down|ssc:100519746,DAB2,100519746:down|ssc:100627019,ABL2,100627019:down|ssc:100153176,SFRP5,100153176:down	http://amigo.geneontology.org/cgi-bin/amigo/term_details?term=GO:2000050
positive regulation of phosphate metabolic process	Biological Process	GO:0045937	34	222	0.000223336	0.00795309	ssc:100270814,-,100270814:down|ssc:397122,IL1B1,397122:down|ssc:396927,ZP3,396927:up|ssc:396951,PTHLH,396951:up|ssc:396851,PIK3R5,396851:down|ssc:100523837,PRR5L,100523837:down|ssc:100153460,AKAP5,100153460:down|ssc:100145894,JTB,100145894:up|ssc:100521992,HCLS1,100521992:down|ssc:100152038,OSM,100152038:down|ssc:397201,JAK2,397201:down|ssc:100627019,ABL2,100627019:down|ssc:100155091,ITGA5,100155…	http://amigo.geneontology.org/cgi-bin/amigo/term_details?term=GO:0045937
positive regulation of phosphorus metabolic process	Biological Process	GO:0010562	34	222	0.000223336	0.00795309	ssc:100270814,-,100270814:down|ssc:397122,IL1B1,397122:down|ssc:396927,ZP3,396927:up|ssc:396951,PTHLH,396951:up|ssc:396851,PIK3R5,396851:down|ssc:100523837,PRR5L,100523837:down|ssc:100153460,AKAP5,100153460:down|ssc:100145894,JTB,100145894:up|ssc:100521992,HCLS1,100521992:down|ssc:100152038,OSM,100152038:down|ssc:397201,JAK2,397201:down|ssc:100627019,ABL2,100627019:down|ssc:100155091,ITGA5,100155…	http://amigo.geneontology.org/cgi-bin/amigo/term_details?term=GO:0010562
positive regulation of protein modification process	Biological Process	GO:0031401	35	231	0.00022407	0.00795309	ssc:100270814,-,100270814:down|ssc:100524615,ARID5A,100524615:down|ssc:397122,IL1B1,397122:down|ssc:396927,ZP3,396927:up|ssc:396851,PIK3R5,396851:down|ssc:100523837,PRR5L,100523837:down|ssc:100145894,JTB,100145894:up|ssc:100521992,HCLS1,100521992:down|ssc:100152038,OSM,100152038:down|ssc:100155895,ARRDC4,100155895:down|ssc:397201,JAK2,397201:down|ssc:100627019,ABL2,100627019:down|ssc:100155091,IT…	http://amigo.geneontology.org/cgi-bin/amigo/term_details?term=GO:0031401
regulation of phosphorylation	Biological Process	GO:0042325	46	333	0.000227962	0.00804161	ssc:100270814,-,100270814:down|ssc:397122,IL1B1,397122:down|ssc:396927,ZP3,396927:up|ssc:100522873,EPHA2,100522873:down|ssc:396851,PIK3R5,396851:down|ssc:100523837,PRR5L,100523837:down|ssc:100153176,SFRP5,100153176:down|ssc:100145894,JTB,100145894:up|ssc:100514958,SLAMF8,100514958:down|ssc:100521992,HCLS1,100521992:down|ssc:100152038,OSM,100152038:down|ssc:100144523,PMEPA1,100144523:down|ssc:3972…	http://amigo.geneontology.org/cgi-bin/amigo/term_details?term=GO:0042325
positive regulation of phosphorylation	Biological Process	GO:0042327	31	196	0.000234964	0.00823807	ssc:100270814,-,100270814:down|ssc:397122,IL1B1,397122:down|ssc:396927,ZP3,396927:up|ssc:396851,PIK3R5,396851:down|ssc:100523837,PRR5L,100523837:down|ssc:100127483,BMPR2,100127483:down|ssc:100515612,C5AR2,100515612:down|ssc:397495,BDNF,397495:down|ssc:100145894,JTB,100145894:up|ssc:100153791,CYR61,100153791:down|ssc:100521992,HCLS1,100521992:down|ssc:100152038,OSM,100152038:down|ssc:399503,LIF,39…	http://amigo.geneontology.org/cgi-bin/amigo/term_details?term=GO:0042327
single organism signaling	Biological Process	GO:0044700	176	1728	0.000237069	0.00826148	ssc:100270814,-,100270814:down|ssc:100286778,PDK4,100286778:down|ssc:397122,IL1B1,397122:down|ssc:100621027,CX3CL1,100621027:down|ssc:396851,PIK3R5,396851:down|ssc:100622059,KCTD11,100622059:down|ssc:100152404,HEY2,100152404:down|ssc:100153460,AKAP5,100153460:down|ssc:100621675,-,100621675:down|ssc:396665,-,396665:down|ssc:780421,CMKLR1,780421:down|ssc:100037292,ACKR4,100037292:down|ssc:100144523…	http://amigo.geneontology.org/cgi-bin/amigo/term_details?term=GO:0044700
homeostasis of number of cells	Biological Process	GO:0048872	16	74	0.000239808	0.0083066	ssc:396900,AMCF-II,396900:down|ssc:100521992,HCLS1,100521992:down|ssc:100155958,SRF,100155958:down|ssc:100622220,SLC25A38,100622220:up|ssc:100525094,SASH3,100525094:down|ssc:100113425,BMP4,100113425:down|ssc:397201,JAK2,397201:down|ssc:100620216,-,100620216:down|ssc:100038026,TNFSF13B,100038026:down|ssc:397093,INHBA,397093:down|ssc:654298,ID2,654298:down|ssc:100152462,ACVR1B,100152462:down|ssc:10…	http://amigo.geneontology.org/cgi-bin/amigo/term_details?term=GO:0048872
secretion	Biological Process	GO:0046903	34	223	0.000243746	0.00839244	ssc:399541,TLR4,399541:down|ssc:396927,ZP3,396927:up|ssc:396628,VDR,396628:down|ssc:100127489,S100A9,100127489:down|ssc:100524561,PPBP,100524561:down|ssc:100152038,OSM,100152038:down|ssc:100627019,ABL2,100627019:down|ssc:100517086,CSF1R,100517086:down|ssc:100152253,STX11,100152253:down|ssc:100049663,EDN3,100049663:up|ssc:100156882,FURIN,100156882:down|ssc:397614,IL4R,397614:down|ssc:397094,IL1A,3…	http://amigo.geneontology.org/cgi-bin/amigo/term_details?term=GO:0046903
response to lipid	Biological Process	GO:0033993	27	162	0.000248454	0.00850364	ssc:399541,TLR4,399541:down|ssc:100286778,PDK4,100286778:down|ssc:396900,AMCF-II,396900:down|ssc:396628,VDR,396628:down|ssc:100525528,-,100525528:down|ssc:100154350,NFKBIL1,100154350:up|ssc:100524561,PPBP,100524561:down|ssc:100513746,NOCT,100513746:down|ssc:414371,CCR5,414371:down|ssc:100524418,PTGDR,100524418:down|ssc:100113425,BMP4,100113425:down|ssc:100620216,-,100620216:down|ssc:100153960,NR1…	http://amigo.geneontology.org/cgi-bin/amigo/term_details?term=GO:0033993
positive regulation of leukocyte activation	Biological Process	GO:0002696	14	60	0.000251906	0.00855556	ssc:396927,ZP3,396927:up|ssc:397492,DPP4,397492:down|ssc:397246,VNN1,397246:up|ssc:100134969,NFATC2,100134969:down|ssc:100519703,F2RL1,100519703:down|ssc:445528,HLA-DMA,445528:down|ssc:397614,IL4R,397614:down|ssc:100525094,SASH3,100525094:down|ssc:100516296,EGR3,100516296:down|ssc:397271,AIF1,397271:down|ssc:100038026,TNFSF13B,100038026:down|ssc:100271930,IL7R,100271930:down|ssc:397406,FCER1G,397…	http://amigo.geneontology.org/cgi-bin/amigo/term_details?term=GO:0002696
signaling	Biological Process	GO:0023052	176	1730	0.000252947	0.00855556	ssc:100270814,-,100270814:down|ssc:100286778,PDK4,100286778:down|ssc:397122,IL1B1,397122:down|ssc:100621027,CX3CL1,100621027:down|ssc:396851,PIK3R5,396851:down|ssc:100622059,KCTD11,100622059:down|ssc:100152404,HEY2,100152404:down|ssc:100153460,AKAP5,100153460:down|ssc:100621675,-,100621675:down|ssc:396665,-,396665:down|ssc:780421,CMKLR1,780421:down|ssc:100037292,ACKR4,100037292:down|ssc:100144523…	http://amigo.geneontology.org/cgi-bin/amigo/term_details?term=GO:0023052
regulation of phosphate metabolic process	Biological Process	GO:0019220	51	383	0.000261909	0.00880688	ssc:100270814,-,100270814:down|ssc:397122,IL1B1,397122:down|ssc:396927,ZP3,396927:up|ssc:100522873,EPHA2,100522873:down|ssc:396951,PTHLH,396951:up|ssc:396851,PIK3R5,396851:down|ssc:100523837,PRR5L,100523837:down|ssc:100153460,AKAP5,100153460:down|ssc:100153176,SFRP5,100153176:down|ssc:100145894,JTB,100145894:up|ssc:100514958,SLAMF8,100514958:down|ssc:100521992,HCLS1,100521992:down|ssc:100152038,O…	http://amigo.geneontology.org/cgi-bin/amigo/term_details?term=GO:0019220
regulation of lymphocyte activation	Biological Process	GO:0051249	17	82	0.000264192	0.00883199	ssc:396927,ZP3,396927:up|ssc:100516458,TNFSF18,100516458:down|ssc:397492,DPP4,397492:down|ssc:100153191,SIT1,100153191:up|ssc:445528,HLA-DMA,445528:down|ssc:100525094,SASH3,100525094:down|ssc:100516296,EGR3,100516296:down|ssc:100113425,BMP4,100113425:down|ssc:100038026,TNFSF13B,100038026:down|ssc:654298,ID2,654298:down|ssc:100134969,NFATC2,100134969:down|ssc:397246,VNN1,397246:up|ssc:397614,IL4R,…	http://amigo.geneontology.org/cgi-bin/amigo/term_details?term=GO:0051249
apoptotic process	Biological Process	GO:0006915	54	413	0.000275226	0.00914768	ssc:100153411,BCL10B,100153411:down|ssc:100286778,PDK4,100286778:down|ssc:102159980,-,102159980:down|ssc:100522873,EPHA2,100522873:down|ssc:100621027,CX3CL1,100621027:down|ssc:396628,VDR,396628:down|ssc:100127489,S100A9,100127489:down|ssc:100525983,DCUN1D3,100525983:down|ssc:100152404,HEY2,100152404:down|ssc:396665,-,396665:down|ssc:100145894,JTB,100145894:up|ssc:100156860,BCL2A1,100156860:down|s…	http://amigo.geneontology.org/cgi-bin/amigo/term_details?term=GO:0006915
regulation of cytokine production	Biological Process	GO:0001817	23	130	0.000291792	0.00964257	ssc:399541,TLR4,399541:down|ssc:100627693,RAB7B,100627693:down|ssc:396900,AMCF-II,396900:down|ssc:396927,ZP3,396927:up|ssc:100621027,CX3CL1,100621027:down|ssc:100154607,S1PR3,100154607:down|ssc:100515612,C5AR2,100515612:down|ssc:100154350,NFKBIL1,100154350:up|ssc:100516668,RABGEF1,100516668:down|ssc:780421,CMKLR1,780421:down|ssc:100525094,SASH3,100525094:down|ssc:100620216,-,100620216:down|ssc:10…	http://amigo.geneontology.org/cgi-bin/amigo/term_details?term=GO:0001817
multicellular organismal development	Biological Process	GO:0007275	121	1117	0.000302532	0.00994033	ssc:100127155,LMO4,100127155:up|ssc:100621457,-,100621457:down|ssc:100522873,EPHA2,100522873:down|ssc:100621027,CX3CL1,100621027:down|ssc:100622059,KCTD11,100622059:down|ssc:494467,CXCL14,494467:down|ssc:100624677,HNMT,100624677:down|ssc:100152404,HEY2,100152404:down|ssc:100154607,S1PR3,100154607:down|ssc:396665,-,396665:down|ssc:100153176,SFRP5,100153176:down|ssc:100152038,OSM,100152038:down|ssc…	http://amigo.geneontology.org/cgi-bin/amigo/term_details?term=GO:0007275
regulation of growth	Biological Process	GO:0040008	25	147	0.000304329	0.00994257	ssc:396927,ZP3,396927:up|ssc:100127483,BMPR2,100127483:down|ssc:100525983,DCUN1D3,100525983:down|ssc:100152404,HEY2,100152404:down|ssc:396665,-,396665:down|ssc:100153176,SFRP5,100153176:down|ssc:100153791,CYR61,100153791:down|ssc:100155958,SRF,100155958:down|ssc:100525094,SASH3,100525094:down|ssc:397547,NPY1R,397547:up|ssc:100113425,BMP4,100113425:down|ssc:100169702,PROX1,100169702:down|ssc:39762…	http://amigo.geneontology.org/cgi-bin/amigo/term_details?term=GO:0040008
localization	Biological Process	GO:0051179	151	1454	0.00033573	0.0109065	ssc:100621027,CX3CL1,100621027:down|ssc:100153460,AKAP5,100153460:down|ssc:100621675,-,100621675:down|ssc:397186,-,397186:down|ssc:780421,CMKLR1,780421:down|ssc:100622220,SLC25A38,100622220:up|ssc:102158732,-,102158732:down|ssc:100037292,ACKR4,100037292:down|ssc:100518612,MFSD2A,100518612:down|ssc:100144470,PHEROC,100144470:down|ssc:100519335,IFT57,100519335:up|ssc:397614,IL4R,397614:down|ssc:100…	http://amigo.geneontology.org/cgi-bin/amigo/term_details?term=GO:0051179
antigen processing and presentation of peptide or polysaccharide antigen via MHC class II	Biological Process	GO:0002504	5	9	0.000339579	0.0109168	ssc:445528,HLA-DMA,445528:down|ssc:100135050,SLA-DMB,100135050:down|ssc:100174943,IFI30,100174943:down|ssc:100037921,SLA-DQB1,100037921:down|ssc:397406,FCER1G,397406:down	http://amigo.geneontology.org/cgi-bin/amigo/term_details?term=GO:0002504
regulation of lipid biosynthetic process	Biological Process	GO:0046890	10	35	0.000339845	0.0109168	ssc:100286778,PDK4,100286778:down|ssc:396927,ZP3,396927:up|ssc:494015,SCAP,494015:up|ssc:396628,VDR,396628:down|ssc:100153791,CYR61,100153791:down|ssc:100158013,FITM2,100158013:down|ssc:100169702,PROX1,100169702:down|ssc:397497,FGF1,397497:down|ssc:100153960,NR1H4,100153960:up|ssc:100152963,PEX2,100152963:up	http://amigo.geneontology.org/cgi-bin/amigo/term_details?term=GO:0046890
regulation of protein metabolic process	Biological Process	GO:0051246	73	609	0.000359939	0.011498	ssc:100270814,-,100270814:down|ssc:397122,IL1B1,397122:down|ssc:100522873,EPHA2,100522873:down|ssc:396851,PIK3R5,396851:down|ssc:100153176,SFRP5,100153176:down|ssc:100145894,JTB,100145894:up|ssc:100152038,OSM,100152038:down|ssc:100144523,PMEPA1,100144523:down|ssc:100155895,ARRDC4,100155895:down|ssc:397620,FN1,397620:down|ssc:100519335,IFT57,100519335:up|ssc:100154994,SERPINB10,100154994:down|ssc:…	http://amigo.geneontology.org/cgi-bin/amigo/term_details?term=GO:0051246
programmed cell death	Biological Process	GO:0012501	54	418	0.000373384	0.0118617	ssc:100153411,BCL10B,100153411:down|ssc:100286778,PDK4,100286778:down|ssc:102159980,-,102159980:down|ssc:100522873,EPHA2,100522873:down|ssc:100621027,CX3CL1,100621027:down|ssc:396628,VDR,396628:down|ssc:100127489,S100A9,100127489:down|ssc:100525983,DCUN1D3,100525983:down|ssc:100152404,HEY2,100152404:down|ssc:396665,-,396665:down|ssc:100145894,JTB,100145894:up|ssc:100156860,BCL2A1,100156860:down|s…	http://amigo.geneontology.org/cgi-bin/amigo/term_details?term=GO:0012501
negative regulation of MAPK cascade	Biological Process	GO:0043409	11	42	0.000398617	0.0125937	ssc:100516027,SFRP2,100516027:down|ssc:733670,RGS2,733670:up|ssc:100153176,SFRP5,100153176:down|ssc:100523472,DUSP19,100523472:up|ssc:399503,LIF,399503:down|ssc:100519703,F2RL1,100519703:down|ssc:100625570,C3orf33,100625570:up|ssc:100525894,DUSP26,100525894:down|ssc:100113425,BMP4,100113425:down|ssc:396667,PTPN1,396667:down|ssc:100524790,RGS14,100524790:down	http://amigo.geneontology.org/cgi-bin/amigo/term_details?term=GO:0043409
positive regulation of macromolecule metabolic process	Biological Process	GO:0010604	80	684	0.00040382	0.0126883	ssc:100270814,-,100270814:down|ssc:100127155,LMO4,100127155:up|ssc:397122,IL1B1,397122:down|ssc:396851,PIK3R5,396851:down|ssc:100152404,HEY2,100152404:down|ssc:396665,-,396665:down|ssc:100145894,JTB,100145894:up|ssc:100152038,OSM,100152038:down|ssc:100155895,ARRDC4,100155895:down|ssc:397620,FN1,397620:down|ssc:100519335,IFT57,100519335:up|ssc:654298,ID2,654298:down|ssc:100155795,MYLIP,100155795:u…	http://amigo.geneontology.org/cgi-bin/amigo/term_details?term=GO:0010604
positive regulation of cell adhesion	Biological Process	GO:0045785	17	85	0.00041368	0.0129275	ssc:396927,ZP3,396927:up|ssc:100621027,CX3CL1,100621027:down|ssc:397492,DPP4,397492:down|ssc:100153791,CYR61,100153791:down|ssc:445528,HLA-DMA,445528:down|ssc:100525094,SASH3,100525094:down|ssc:100525894,DUSP26,100525894:down|ssc:100516296,EGR3,100516296:down|ssc:100038026,TNFSF13B,100038026:down|ssc:100519746,DAB2,100519746:down|ssc:397087,SPP1,397087:down|ssc:100521305,SMAD7,100521305:down|ssc:…	http://amigo.geneontology.org/cgi-bin/amigo/term_details?term=GO:0045785
peptide metabolic process	Biological Process	GO:0006518	8	24	0.000423965	0.01315	ssc:100521480,GSTK1,100521480:up|ssc:100624445,-,100624445:down|ssc:397682,-,397682:up|ssc:100156882,FURIN,100156882:down|ssc:100522018,GCLC,100522018:down|ssc:100153094,-,100153094:up|ssc:396969,CTSH,396969:down|ssc:100511536,MME,100511536:down	http://amigo.geneontology.org/cgi-bin/amigo/term_details?term=GO:0006518
glycosaminoglycan binding	Molecular Function	GO:0005539	12	49	0.000430191	0.01315	ssc:100154395,NOV,100154395:down|ssc:100620511,CLEC3B,100620511:up|ssc:100525150,CD44,100525150:down|ssc:100152401,POSTN,100152401:down|ssc:397564,HBEGF,397564:down|ssc:100153791,CYR61,100153791:down|ssc:397609,PTF-BETA,397609:up|ssc:445513,HAPLN1,445513:up|ssc:396806,BSP1,396806:up|ssc:100113425,BMP4,100113425:down|ssc:397497,FGF1,397497:down|ssc:396623,TLR2,396623:down	http://amigo.geneontology.org/cgi-bin/amigo/term_details?term=GO:0005539
serine-type peptidase activity	Molecular Function	GO:0008236	12	49	0.000430191	0.01315	ssc:100620361,-,100620361:down|ssc:397649,LTF,397649:up|ssc:100621642,-,100621642:up|ssc:100517601,RHBDF2,100517601:down|ssc:396985,PLAU,396985:down|ssc:397492,DPP4,397492:down|ssc:100522387,CTSC,100522387:up|ssc:100156882,FURIN,100156882:down|ssc:100517495,CPD,100517495:down|ssc:396766,CELA1,396766:up|ssc:396969,CTSH,396969:down|ssc:100156168,PRSS35,100156168:down	http://amigo.geneontology.org/cgi-bin/amigo/term_details?term=GO:0008236
homeostatic process	Biological Process	GO:0042592	47	352	0.000431283	0.01315	ssc:100270814,-,100270814:down|ssc:100286778,PDK4,100286778:down|ssc:414375,XCR1,414375:down|ssc:397122,IL1B1,397122:down|ssc:396951,PTHLH,396951:up|ssc:396628,VDR,396628:down|ssc:100514958,SLAMF8,100514958:down|ssc:100521992,HCLS1,100521992:down|ssc:100622220,SLC25A38,100622220:up|ssc:397201,JAK2,397201:down|ssc:100620216,-,100620216:down|ssc:100156133,SLC35G1,100156133:down|ssc:100627019,ABL2,1…	http://amigo.geneontology.org/cgi-bin/amigo/term_details?term=GO:0042592
positive regulation of cell activation	Biological Process	GO:0050867	14	63	0.000432234	0.01315	ssc:396927,ZP3,396927:up|ssc:397492,DPP4,397492:down|ssc:397246,VNN1,397246:up|ssc:100134969,NFATC2,100134969:down|ssc:100519703,F2RL1,100519703:down|ssc:445528,HLA-DMA,445528:down|ssc:397614,IL4R,397614:down|ssc:100525094,SASH3,100525094:down|ssc:100516296,EGR3,100516296:down|ssc:397271,AIF1,397271:down|ssc:100038026,TNFSF13B,100038026:down|ssc:100271930,IL7R,100271930:down|ssc:397406,FCER1G,397…	http://amigo.geneontology.org/cgi-bin/amigo/term_details?term=GO:0050867
positive regulation of leukocyte differentiation	Biological Process	GO:1902107	10	36	0.000436789	0.0132186	ssc:654298,ID2,654298:down|ssc:414374,CCR1,414374:down|ssc:397246,VNN1,397246:up|ssc:445528,HLA-DMA,445528:down|ssc:397614,IL4R,397614:down|ssc:399503,LIF,399503:down|ssc:100521992,HCLS1,100521992:down|ssc:100525094,SASH3,100525094:down|ssc:100516296,EGR3,100516296:down|ssc:100271930,IL7R,100271930:down	http://amigo.geneontology.org/cgi-bin/amigo/term_details?term=GO:1902107
regulation of leukocyte differentiation	Biological Process	GO:1902105	13	56	0.000439507	0.0132312	ssc:397649,LTF,397649:up|ssc:654298,ID2,654298:down|ssc:414374,CCR1,414374:down|ssc:397246,VNN1,397246:up|ssc:100521992,HCLS1,100521992:down|ssc:445528,HLA-DMA,445528:down|ssc:397614,IL4R,397614:down|ssc:399503,LIF,399503:down|ssc:100525094,SASH3,100525094:down|ssc:397405,TYROBP,397405:down|ssc:100113425,BMP4,100113425:down|ssc:100516296,EGR3,100516296:down|ssc:100271930,IL7R,100271930:down	http://amigo.geneontology.org/cgi-bin/amigo/term_details?term=GO:1902105
regulation of cell differentiation	Biological Process	GO:0045595	48	363	0.00046926	0.0140534	ssc:100127155,LMO4,100127155:up|ssc:396951,PTHLH,396951:up|ssc:100622059,KCTD11,100622059:down|ssc:396628,VDR,396628:down|ssc:494467,CXCL14,494467:down|ssc:100152404,HEY2,100152404:down|ssc:100154607,S1PR3,100154607:down|ssc:396665,-,396665:down|ssc:780421,CMKLR1,780421:down|ssc:100521992,HCLS1,100521992:down|ssc:445528,HLA-DMA,445528:down|ssc:397620,FN1,397620:down|ssc:100627019,ABL2,100627019:d…	http://amigo.geneontology.org/cgi-bin/amigo/term_details?term=GO:0045595
negative regulation of biological process	Biological Process	GO:0048519	119	1107	0.000473672	0.014112	ssc:100270814,-,100270814:down|ssc:100286778,PDK4,100286778:down|ssc:100127155,LMO4,100127155:up|ssc:396724,OLR1,396724:down|ssc:100522873,EPHA2,100522873:down|ssc:100621027,CX3CL1,100621027:down|ssc:100622059,KCTD11,100622059:down|ssc:494467,CXCL14,494467:down|ssc:100525983,DCUN1D3,100525983:down|ssc:100152404,HEY2,100152404:down|ssc:397492,DPP4,397492:down|ssc:100154607,S1PR3,100154607:down|ssc…	http://amigo.geneontology.org/cgi-bin/amigo/term_details?term=GO:0048519
ventricular septum development	Biological Process	GO:0003281	7	19	0.000489896	0.0145201	ssc:100153791,CYR61,100153791:down|ssc:100521305,SMAD7,100521305:down|ssc:100127155,LMO4,100127155:up|ssc:100620499,LUZP1,100620499:down|ssc:654298,ID2,654298:down|ssc:100169702,PROX1,100169702:down|ssc:100152404,HEY2,100152404:down	http://amigo.geneontology.org/cgi-bin/amigo/term_details?term=GO:0003281
regulation of cell-cell adhesion	Biological Process	GO:0022407	18	94	0.000492744	0.0145296	ssc:396927,ZP3,396927:up|ssc:100621027,CX3CL1,100621027:down|ssc:100516458,TNFSF18,100516458:down|ssc:397492,DPP4,397492:down|ssc:100153191,SIT1,100153191:up|ssc:445528,HLA-DMA,445528:down|ssc:100525094,SASH3,100525094:down|ssc:100516296,EGR3,100516296:down|ssc:100113425,BMP4,100113425:down|ssc:100038026,TNFSF13B,100038026:down|ssc:100627019,ABL2,100627019:down|ssc:100521305,SMAD7,100521305:down|…	http://amigo.geneontology.org/cgi-bin/amigo/term_details?term=GO:0022407
regulation of T cell activation	Biological Process	GO:0050863	14	64	0.000512793	0.0150437	ssc:396927,ZP3,396927:up|ssc:100516458,TNFSF18,100516458:down|ssc:397492,DPP4,397492:down|ssc:397246,VNN1,397246:up|ssc:100153191,SIT1,100153191:up|ssc:445528,HLA-DMA,445528:down|ssc:397614,IL4R,397614:down|ssc:100525094,SASH3,100525094:down|ssc:100516296,EGR3,100516296:down|ssc:397271,AIF1,397271:down|ssc:100113425,BMP4,100113425:down|ssc:100038026,TNFSF13B,100038026:down|ssc:100271930,IL7R,1002…	http://amigo.geneontology.org/cgi-bin/amigo/term_details?term=GO:0050863
serine hydrolase activity	Molecular Function	GO:0017171	12	50	0.000524977	0.0153229	ssc:100620361,-,100620361:down|ssc:397649,LTF,397649:up|ssc:100621642,-,100621642:up|ssc:100517601,RHBDF2,100517601:down|ssc:396985,PLAU,396985:down|ssc:397492,DPP4,397492:down|ssc:100522387,CTSC,100522387:up|ssc:100156882,FURIN,100156882:down|ssc:100517495,CPD,100517495:down|ssc:396766,CELA1,396766:up|ssc:396969,CTSH,396969:down|ssc:100156168,PRSS35,100156168:down	http://amigo.geneontology.org/cgi-bin/amigo/term_details?term=GO:0017171
positive regulation of cell-cell adhesion	Biological Process	GO:0022409	13	57	0.000527876	0.0153297	ssc:396927,ZP3,396927:up|ssc:100621027,CX3CL1,100621027:down|ssc:397492,DPP4,397492:down|ssc:397246,VNN1,397246:up|ssc:100521305,SMAD7,100521305:down|ssc:445528,HLA-DMA,445528:down|ssc:397614,IL4R,397614:down|ssc:100525094,SASH3,100525094:down|ssc:397271,AIF1,397271:down|ssc:100516296,EGR3,100516296:down|ssc:100038026,TNFSF13B,100038026:down|ssc:100271930,IL7R,100271930:down|ssc:397441,CD86,39744…	http://amigo.geneontology.org/cgi-bin/amigo/term_details?term=GO:0022409
regulation of cellular protein metabolic process	Biological Process	GO:0032268	69	576	0.000540073	0.015555	ssc:100270814,-,100270814:down|ssc:397122,IL1B1,397122:down|ssc:100522873,EPHA2,100522873:down|ssc:396851,PIK3R5,396851:down|ssc:100153176,SFRP5,100153176:down|ssc:100145894,JTB,100145894:up|ssc:100152038,OSM,100152038:down|ssc:100144523,PMEPA1,100144523:down|ssc:100155895,ARRDC4,100155895:down|ssc:397620,FN1,397620:down|ssc:100519335,IFT57,100519335:up|ssc:100154994,SERPINB10,100154994:down|ssc:…	http://amigo.geneontology.org/cgi-bin/amigo/term_details?term=GO:0032268
hexokinase activity	Molecular Function	GO:0004396	3	3	0.000541044	0.015555	ssc:100514142,GCK,100514142:up|ssc:494561,HK2,494561:down|ssc:100522855,HK3,100522855:down	http://amigo.geneontology.org/cgi-bin/amigo/term_details?term=GO:0004396
regulation of cytokine secretion	Biological Process	GO:0050707	10	37	0.000555643	0.0158953	ssc:399541,TLR4,399541:down|ssc:100517086,CSF1R,100517086:down|ssc:100515612,C5AR2,100515612:down|ssc:100516668,RABGEF1,100516668:down|ssc:397614,IL4R,397614:down|ssc:397094,IL1A,397094:down|ssc:100519703,F2RL1,100519703:down|ssc:397106,IL10,397106:down|ssc:396623,TLR2,396623:down|ssc:100627019,ABL2,100627019:down	http://amigo.geneontology.org/cgi-bin/amigo/term_details?term=GO:0050707
regulation of osteoblast proliferation	Biological Process	GO:0033688	4	6	0.000576349	0.0160211	ssc:100153791,CYR61,100153791:down|ssc:397649,LTF,397649:up|ssc:100156280,GREM1,100156280:down|ssc:397063,ITGB3,397063:down	http://amigo.geneontology.org/cgi-bin/amigo/term_details?term=GO:0033688
mast cell mediated immunity	Biological Process	GO:0002448	4	6	0.000576349	0.0160211	ssc:100516668,RABGEF1,100516668:down|ssc:100155631,FES,100155631:down|ssc:100511161,PLA2G3,100511161:down|ssc:397406,FCER1G,397406:down	http://amigo.geneontology.org/cgi-bin/amigo/term_details?term=GO:0002448
mast cell degranulation	Biological Process	GO:0043303	4	6	0.000576349	0.0160211	ssc:100516668,RABGEF1,100516668:down|ssc:100155631,FES,100155631:down|ssc:100511161,PLA2G3,100511161:down|ssc:397406,FCER1G,397406:down	http://amigo.geneontology.org/cgi-bin/amigo/term_details?term=GO:0043303
mast cell activation involved in immune response	Biological Process	GO:0002279	4	6	0.000576349	0.0160211	ssc:100516668,RABGEF1,100516668:down|ssc:100155631,FES,100155631:down|ssc:100511161,PLA2G3,100511161:down|ssc:397406,FCER1G,397406:down	http://amigo.geneontology.org/cgi-bin/amigo/term_details?term=GO:0002279
positive regulation of myeloid cell differentiation	Biological Process	GO:0045639	8	25	0.000579547	0.0160211	ssc:100627693,RAB7B,100627693:down|ssc:397093,INHBA,397093:down|ssc:100155631,FES,100155631:down|ssc:654298,ID2,654298:down|ssc:414374,CCR1,414374:down|ssc:100152462,ACVR1B,100152462:down|ssc:399503,LIF,399503:down|ssc:100521992,HCLS1,100521992:down	http://amigo.geneontology.org/cgi-bin/amigo/term_details?term=GO:0045639
regulation of protein kinase B signaling	Biological Process	GO:0051896	8	25	0.000579547	0.0160211	ssc:100270814,-,100270814:down|ssc:396927,ZP3,396927:up|ssc:100522873,EPHA2,100522873:down|ssc:396851,PIK3R5,396851:down|ssc:396865,CHI3L1,396865:down|ssc:100153176,SFRP5,100153176:down|ssc:397564,HBEGF,397564:down|ssc:100521992,HCLS1,100521992:down	http://amigo.geneontology.org/cgi-bin/amigo/term_details?term=GO:0051896
single-organism carbohydrate catabolic process	Biological Process	GO:0044724	8	25	0.000579547	0.0160211	ssc:100515931,PPP1R3B,100515931:down|ssc:100522855,HK3,100522855:down|ssc:397337,DHDH,397337:up|ssc:100514142,GCK,100514142:up|ssc:494561,HK2,494561:down|ssc:100124381,NEU1,100124381:down|ssc:397038,FBP1,397038:down|ssc:100515283,GM2A,100515283:down	http://amigo.geneontology.org/cgi-bin/amigo/term_details?term=GO:0044724
cytokine receptor binding	Molecular Function	GO:0005126	22	128	0.000595295	0.0163065	ssc:396900,AMCF-II,396900:down|ssc:397122,IL1B1,397122:down|ssc:100621027,CX3CL1,100621027:down|ssc:100516458,TNFSF18,100516458:down|ssc:494467,CXCL14,494467:down|ssc:100525528,-,100525528:down|ssc:397495,BDNF,397495:down|ssc:100524561,PPBP,100524561:down|ssc:414904,CXCL2,414904:down|ssc:100152038,OSM,100152038:down|ssc:399503,LIF,399503:down|ssc:100113425,BMP4,100113425:down|ssc:100038026,TNFSF1…	http://amigo.geneontology.org/cgi-bin/amigo/term_details?term=GO:0005126
cell death	Biological Process	GO:0008219	55	436	0.000598419	0.0163065	ssc:100153411,BCL10B,100153411:down|ssc:100286778,PDK4,100286778:down|ssc:102159980,-,102159980:down|ssc:100522873,EPHA2,100522873:down|ssc:100621027,CX3CL1,100621027:down|ssc:396628,VDR,396628:down|ssc:100127489,S100A9,100127489:down|ssc:100525983,DCUN1D3,100525983:down|ssc:100152404,HEY2,100152404:down|ssc:396665,-,396665:down|ssc:100145894,JTB,100145894:up|ssc:100156860,BCL2A1,100156860:down|s…	http://amigo.geneontology.org/cgi-bin/amigo/term_details?term=GO:0008219
cell communication	Biological Process	GO:0007154	176	1758	0.000606544	0.0163065	ssc:100270814,-,100270814:down|ssc:100286778,PDK4,100286778:down|ssc:397122,IL1B1,397122:down|ssc:100621027,CX3CL1,100621027:down|ssc:396851,PIK3R5,396851:down|ssc:100622059,KCTD11,100622059:down|ssc:100152404,HEY2,100152404:down|ssc:100153460,AKAP5,100153460:down|ssc:100621675,-,100621675:down|ssc:396665,-,396665:down|ssc:780421,CMKLR1,780421:down|ssc:100037292,ACKR4,100037292:down|ssc:100144523…	http://amigo.geneontology.org/cgi-bin/amigo/term_details?term=GO:0007154
extracellular organelle	Cellular Component	GO:0043230	87	767	0.00060972	0.0163065	ssc:100739619,NDUFB1,100739619:up|ssc:100624677,HNMT,100624677:down|ssc:100621675,-,100621675:down|ssc:397492,DPP4,397492:down|ssc:100519675,RPL35A,100519675:up|ssc:445528,HLA-DMA,445528:down|ssc:100524550,VPS37D,100524550:up|ssc:100157902,DNPH1,100157902:up|ssc:100627480,TFF3,100627480:up|ssc:397620,FN1,397620:down|ssc:100270722,ARF5,100270722:up|ssc:100522360,-,100522360:down|ssc:100622868,CLIC…	http://amigo.geneontology.org/cgi-bin/amigo/term_details?term=GO:0043230
extracellular exosome	Cellular Component	GO:0070062	87	767	0.00060972	0.0163065	ssc:100739619,NDUFB1,100739619:up|ssc:100624677,HNMT,100624677:down|ssc:100621675,-,100621675:down|ssc:397492,DPP4,397492:down|ssc:100519675,RPL35A,100519675:up|ssc:445528,HLA-DMA,445528:down|ssc:100524550,VPS37D,100524550:up|ssc:100157902,DNPH1,100157902:up|ssc:100627480,TFF3,100627480:up|ssc:397620,FN1,397620:down|ssc:100270722,ARF5,100270722:up|ssc:100522360,-,100522360:down|ssc:100622868,CLIC…	http://amigo.geneontology.org/cgi-bin/amigo/term_details?term=GO:0070062
extracellular membrane-bounded organelle	Cellular Component	GO:0065010	87	767	0.00060972	0.0163065	ssc:100739619,NDUFB1,100739619:up|ssc:100624677,HNMT,100624677:down|ssc:100621675,-,100621675:down|ssc:397492,DPP4,397492:down|ssc:100519675,RPL35A,100519675:up|ssc:445528,HLA-DMA,445528:down|ssc:100524550,VPS37D,100524550:up|ssc:100157902,DNPH1,100157902:up|ssc:100627480,TFF3,100627480:up|ssc:397620,FN1,397620:down|ssc:100270722,ARF5,100270722:up|ssc:100522360,-,100522360:down|ssc:100622868,CLIC…	http://amigo.geneontology.org/cgi-bin/amigo/term_details?term=GO:0065010
extracellular vesicle	Cellular Component	GO:1903561	87	767	0.00060972	0.0163065	ssc:100739619,NDUFB1,100739619:up|ssc:100624677,HNMT,100624677:down|ssc:100621675,-,100621675:down|ssc:397492,DPP4,397492:down|ssc:100519675,RPL35A,100519675:up|ssc:445528,HLA-DMA,445528:down|ssc:100524550,VPS37D,100524550:up|ssc:100157902,DNPH1,100157902:up|ssc:100627480,TFF3,100627480:up|ssc:397620,FN1,397620:down|ssc:100270722,ARF5,100270722:up|ssc:100522360,-,100522360:down|ssc:100622868,CLIC…	http://amigo.geneontology.org/cgi-bin/amigo/term_details?term=GO:1903561
myeloid cell homeostasis	Biological Process	GO:0002262	11	44	0.00061484	0.0163673	ssc:397093,INHBA,397093:down|ssc:654298,ID2,654298:down|ssc:100152462,ACVR1B,100152462:down|ssc:100155958,SRF,100155958:down|ssc:100521992,HCLS1,100521992:down|ssc:100622220,SLC25A38,100622220:up|ssc:100113425,BMP4,100113425:down|ssc:397201,JAK2,397201:down|ssc:100620216,-,100620216:down|ssc:100038002,ATPIF1,100038002:up|ssc:397406,FCER1G,397406:down	http://amigo.geneontology.org/cgi-bin/amigo/term_details?term=GO:0002262
death	Biological Process	GO:0016265	55	437	0.000633165	0.0167774	ssc:100153411,BCL10B,100153411:down|ssc:100286778,PDK4,100286778:down|ssc:102159980,-,102159980:down|ssc:100522873,EPHA2,100522873:down|ssc:100621027,CX3CL1,100621027:down|ssc:396628,VDR,396628:down|ssc:100127489,S100A9,100127489:down|ssc:100525983,DCUN1D3,100525983:down|ssc:100152404,HEY2,100152404:down|ssc:396665,-,396665:down|ssc:100145894,JTB,100145894:up|ssc:100156860,BCL2A1,100156860:down|s…	http://amigo.geneontology.org/cgi-bin/amigo/term_details?term=GO:0016265
regulation of response to external stimulus	Biological Process	GO:0032101	24	146	0.00066693	0.0175911	ssc:396900,AMCF-II,396900:down|ssc:396927,ZP3,396927:up|ssc:100621027,CX3CL1,100621027:down|ssc:100127483,BMPR2,100127483:down|ssc:100127489,S100A9,100127489:down|ssc:100525528,-,100525528:down|ssc:100621675,-,100621675:down|ssc:100515612,C5AR2,100515612:down|ssc:100154350,NFKBIL1,100154350:up|ssc:100524561,PPBP,100524561:down|ssc:100516668,RABGEF1,100516668:down|ssc:414372,CCR2,414372:down|ssc:7…	http://amigo.geneontology.org/cgi-bin/amigo/term_details?term=GO:0032101
pyridine-containing compound metabolic process	Biological Process	GO:0072524	7	20	0.000701271	0.0181636	ssc:100038014,RPIA,100038014:down|ssc:100514142,GCK,100514142:up|ssc:595123,NAMPT,595123:up|ssc:494561,HK2,494561:down|ssc:397132,FMO1,397132:down|ssc:100522855,HK3,100522855:down|ssc:397038,FBP1,397038:down	http://amigo.geneontology.org/cgi-bin/amigo/term_details?term=GO:0072524
nicotinamide nucleotide metabolic process	Biological Process	GO:0046496	7	20	0.000701271	0.0181636	ssc:100038014,RPIA,100038014:down|ssc:100514142,GCK,100514142:up|ssc:595123,NAMPT,595123:up|ssc:494561,HK2,494561:down|ssc:397132,FMO1,397132:down|ssc:100522855,HK3,100522855:down|ssc:397038,FBP1,397038:down	http://amigo.geneontology.org/cgi-bin/amigo/term_details?term=GO:0046496
positive regulation of cytokine secretion	Biological Process	GO:0050715	7	20	0.000701271	0.0181636	ssc:100519703,F2RL1,100519703:down|ssc:397094,IL1A,397094:down|ssc:397614,IL4R,397614:down|ssc:397106,IL10,397106:down|ssc:100517086,CSF1R,100517086:down|ssc:396623,TLR2,396623:down|ssc:100627019,ABL2,100627019:down	http://amigo.geneontology.org/cgi-bin/amigo/term_details?term=GO:0050715
pyridine nucleotide metabolic process	Biological Process	GO:0019362	7	20	0.000701271	0.0181636	ssc:100038014,RPIA,100038014:down|ssc:100514142,GCK,100514142:up|ssc:595123,NAMPT,595123:up|ssc:494561,HK2,494561:down|ssc:397132,FMO1,397132:down|ssc:100522855,HK3,100522855:down|ssc:397038,FBP1,397038:down	http://amigo.geneontology.org/cgi-bin/amigo/term_details?term=GO:0019362
positive regulation of immune response	Biological Process	GO:0050778	20	113	0.000711371	0.0182963	ssc:399541,TLR4,399541:down|ssc:100627693,RAB7B,100627693:down|ssc:396927,ZP3,396927:up|ssc:100627308,-,100627308:down|ssc:100154350,NFKBIL1,100154350:up|ssc:100516668,RABGEF1,100516668:down|ssc:445528,HLA-DMA,445528:down|ssc:100525094,SASH3,100525094:down|ssc:100620216,-,100620216:down|ssc:100038026,TNFSF13B,100038026:down|ssc:100038025,CLEC7A,100038025:down|ssc:100627864,LAT2,100627864:down|ssc…	http://amigo.geneontology.org/cgi-bin/amigo/term_details?term=GO:0050778
epithelial cell differentiation	Biological Process	GO:0030855	26	164	0.000712761	0.0182963	ssc:100621502,-,100621502:up|ssc:100522873,EPHA2,100522873:down|ssc:396951,PTHLH,396951:up|ssc:396628,VDR,396628:down|ssc:100523990,FN3K,100523990:up|ssc:100127483,BMPR2,100127483:down|ssc:100152404,HEY2,100152404:down|ssc:100154607,S1PR3,100154607:down|ssc:399503,LIF,399503:down|ssc:100157902,DNPH1,100157902:up|ssc:100113425,BMP4,100113425:down|ssc:100169702,PROX1,100169702:down|ssc:100127138,F1…	http://amigo.geneontology.org/cgi-bin/amigo/term_details?term=GO:0030855
positive regulation of leukocyte cell-cell adhesion	Biological Process	GO:1903039	11	45	0.000755098	0.0192116	ssc:396927,ZP3,396927:up|ssc:397492,DPP4,397492:down|ssc:397246,VNN1,397246:up|ssc:445528,HLA-DMA,445528:down|ssc:397614,IL4R,397614:down|ssc:100525094,SASH3,100525094:down|ssc:397271,AIF1,397271:down|ssc:100516296,EGR3,100516296:down|ssc:100038026,TNFSF13B,100038026:down|ssc:100271930,IL7R,100271930:down|ssc:397441,CD86,397441:down	http://amigo.geneontology.org/cgi-bin/amigo/term_details?term=GO:1903039
positive regulation of T cell activation	Biological Process	GO:0050870	11	45	0.000755098	0.0192116	ssc:396927,ZP3,396927:up|ssc:397492,DPP4,397492:down|ssc:397246,VNN1,397246:up|ssc:445528,HLA-DMA,445528:down|ssc:397614,IL4R,397614:down|ssc:100525094,SASH3,100525094:down|ssc:397271,AIF1,397271:down|ssc:100516296,EGR3,100516296:down|ssc:100038026,TNFSF13B,100038026:down|ssc:100271930,IL7R,100271930:down|ssc:397441,CD86,397441:down	http://amigo.geneontology.org/cgi-bin/amigo/term_details?term=GO:0050870
positive regulation of protein kinase B signaling	Biological Process	GO:0051897	6	15	0.000758796	0.0192206	ssc:397564,HBEGF,397564:down|ssc:100270814,-,100270814:down|ssc:100521992,HCLS1,100521992:down|ssc:396927,ZP3,396927:up|ssc:396851,PIK3R5,396851:down|ssc:396865,CHI3L1,396865:down	http://amigo.geneontology.org/cgi-bin/amigo/term_details?term=GO:0051897
endothelial cell migration	Biological Process	GO:0043542	9	32	0.000763895	0.0192649	ssc:100522873,EPHA2,100522873:down|ssc:100127483,BMPR2,100127483:down|ssc:397492,DPP4,397492:down|ssc:100156280,GREM1,100156280:down|ssc:100511141,VASH1,100511141:down|ssc:100155958,SRF,100155958:down|ssc:100113425,BMP4,100113425:down|ssc:100516296,EGR3,100516296:down|ssc:100169702,PROX1,100169702:down	http://amigo.geneontology.org/cgi-bin/amigo/term_details?term=GO:0043542
activation of immune response	Biological Process	GO:0002253	15	74	0.000770815	0.0193545	ssc:399541,TLR4,399541:down|ssc:100627693,RAB7B,100627693:down|ssc:100038025,CLEC7A,100038025:down|ssc:100627864,LAT2,100627864:down|ssc:100627308,-,100627308:down|ssc:100517988,-,100517988:down|ssc:100154350,NFKBIL1,100154350:up|ssc:100134969,NFATC2,100134969:down|ssc:100516668,RABGEF1,100516668:down|ssc:100519703,F2RL1,100519703:down|ssc:100620216,-,100620216:down|ssc:397406,FCER1G,397406:down|…	http://amigo.geneontology.org/cgi-bin/amigo/term_details?term=GO:0002253
regulation of interleukin-6 production	Biological Process	GO:0032675	8	26	0.000778202	0.0194551	ssc:100627693,RAB7B,100627693:down|ssc:100515612,C5AR2,100515612:down|ssc:100516668,RABGEF1,100516668:down|ssc:100519703,F2RL1,100519703:down|ssc:397106,IL10,397106:down|ssc:397406,FCER1G,397406:down|ssc:396623,TLR2,396623:down|ssc:100521986,MAPKAPK2,100521986:down	http://amigo.geneontology.org/cgi-bin/amigo/term_details?term=GO:0032675
negative regulation of response to stimulus	Biological Process	GO:0048585	42	313	0.000787168	0.019594	ssc:100522873,EPHA2,100522873:down|ssc:100621027,CX3CL1,100621027:down|ssc:100622059,KCTD11,100622059:down|ssc:100152404,HEY2,100152404:down|ssc:100153176,SFRP5,100153176:down|ssc:100144523,PMEPA1,100144523:down|ssc:100627019,ABL2,100627019:down|ssc:100518125,YBX3,100518125:up|ssc:100152419,FRZB,100152419:up|ssc:100525762,DDIT4L,100525762:down|ssc:733670,RGS2,733670:up|ssc:100156280,GREM1,1001562…	http://amigo.geneontology.org/cgi-bin/amigo/term_details?term=GO:0048585
plasma membrane part	Cellular Component	GO:0044459	53	421	0.000791587	0.0196191	ssc:100522873,EPHA2,100522873:down|ssc:100627308,-,100627308:down|ssc:397492,DPP4,397492:down|ssc:100048958,GNA14,100048958:down|ssc:445528,HLA-DMA,445528:down|ssc:100135050,SLA-DMB,100135050:down|ssc:100518612,MFSD2A,100518612:down|ssc:100037921,SLA-DQB1,100037921:down|ssc:397620,FN1,397620:down|ssc:100627019,ABL2,100627019:down|ssc:404772,GEM,404772:down|ssc:100155091,ITGA5,100155091:down|ssc:7…	http://amigo.geneontology.org/cgi-bin/amigo/term_details?term=GO:0044459
positive regulation of cellular metabolic process	Biological Process	GO:0031325	79	689	0.000814124	0.020091	ssc:100270814,-,100270814:down|ssc:100127155,LMO4,100127155:up|ssc:396724,OLR1,396724:down|ssc:397122,IL1B1,397122:down|ssc:396851,PIK3R5,396851:down|ssc:100152404,HEY2,100152404:down|ssc:100153460,AKAP5,100153460:down|ssc:396665,-,396665:down|ssc:100145894,JTB,100145894:up|ssc:100152038,OSM,100152038:down|ssc:100155895,ARRDC4,100155895:down|ssc:397620,FN1,397620:down|ssc:100519335,IFT57,10051933…	http://amigo.geneontology.org/cgi-bin/amigo/term_details?term=GO:0031325
regulation of leukocyte cell-cell adhesion	Biological Process	GO:1903037	14	67	0.000835137	0.0205215	ssc:396927,ZP3,396927:up|ssc:100516458,TNFSF18,100516458:down|ssc:397492,DPP4,397492:down|ssc:397246,VNN1,397246:up|ssc:100153191,SIT1,100153191:up|ssc:445528,HLA-DMA,445528:down|ssc:397614,IL4R,397614:down|ssc:100525094,SASH3,100525094:down|ssc:100516296,EGR3,100516296:down|ssc:397271,AIF1,397271:down|ssc:100113425,BMP4,100113425:down|ssc:100038026,TNFSF13B,100038026:down|ssc:100271930,IL7R,1002…	http://amigo.geneontology.org/cgi-bin/amigo/term_details?term=GO:1903037
negative regulation of multicellular organismal process	Biological Process	GO:0051241	35	248	0.00086905	0.021264	ssc:396724,OLR1,396724:down|ssc:396951,PTHLH,396951:up|ssc:100622059,KCTD11,100622059:down|ssc:100153176,SFRP5,100153176:down|ssc:780421,CMKLR1,780421:down|ssc:396579,TNNT1,396579:up|ssc:100518125,YBX3,100518125:up|ssc:100152419,FRZB,100152419:up|ssc:654298,ID2,654298:down|ssc:733670,RGS2,733670:up|ssc:100155795,MYLIP,100155795:up|ssc:100156280,GREM1,100156280:down|ssc:100155995,NFIB,100155995:up…	http://amigo.geneontology.org/cgi-bin/amigo/term_details?term=GO:0051241
osteoblast differentiation	Biological Process	GO:0001649	13	60	0.000888033	0.0216364	ssc:100516027,SFRP2,100516027:down|ssc:397649,LTF,397649:up|ssc:397137,IBSP,397137:down|ssc:100522873,EPHA2,100522873:down|ssc:396951,PTHLH,396951:up|ssc:100127483,BMPR2,100127483:down|ssc:654298,ID2,654298:down|ssc:100153791,CYR61,100153791:down|ssc:100152247,TP53INP2,100152247:down|ssc:654297,CITED1,654297:up|ssc:100513746,NOCT,100513746:down|ssc:100522839,ID1,100522839:up|ssc:100113425,BMP4,10…	http://amigo.geneontology.org/cgi-bin/amigo/term_details?term=GO:0001649
positive regulation of homotypic cell-cell adhesion	Biological Process	GO:0034112	11	46	0.000920922	0.0223431	ssc:396927,ZP3,396927:up|ssc:397492,DPP4,397492:down|ssc:397246,VNN1,397246:up|ssc:445528,HLA-DMA,445528:down|ssc:397614,IL4R,397614:down|ssc:100525094,SASH3,100525094:down|ssc:397271,AIF1,397271:down|ssc:100516296,EGR3,100516296:down|ssc:100038026,TNFSF13B,100038026:down|ssc:100271930,IL7R,100271930:down|ssc:397441,CD86,397441:down	http://amigo.geneontology.org/cgi-bin/amigo/term_details?term=GO:0034112
positive regulation of intracellular signal transduction	Biological Process	GO:1902533	32	221	0.000926157	0.0223756	ssc:100270814,-,100270814:down|ssc:397122,IL1B1,397122:down|ssc:396927,ZP3,396927:up|ssc:396851,PIK3R5,396851:down|ssc:100523837,PRR5L,100523837:down|ssc:100127489,S100A9,100127489:down|ssc:100153460,AKAP5,100153460:down|ssc:100521992,HCLS1,100521992:down|ssc:100152038,OSM,100152038:down|ssc:397201,JAK2,397201:down|ssc:100156358,S100A4,100156358:down|ssc:100627019,ABL2,100627019:down|ssc:10051708…	http://amigo.geneontology.org/cgi-bin/amigo/term_details?term=GO:1902533
negative regulation of protein phosphorylation	Biological Process	GO:0001933	18	99	0.000937251	0.0225489	ssc:100523837,PRR5L,100523837:down|ssc:100517189,CTDSPL,100517189:up|ssc:100153176,SFRP5,100153176:down|ssc:100516668,RABGEF1,100516668:down|ssc:399503,LIF,399503:down|ssc:100144523,PMEPA1,100144523:down|ssc:100625570,C3orf33,100625570:up|ssc:100525894,DUSP26,100525894:down|ssc:100113425,BMP4,100113425:down|ssc:100516027,SFRP2,100516027:down|ssc:733670,RGS2,733670:up|ssc:100156280,GREM1,100156280…	http://amigo.geneontology.org/cgi-bin/amigo/term_details?term=GO:0001933
regulation of molecular function	Biological Process	GO:0065009	69	588	0.000962448	0.0230586	ssc:396851,PIK3R5,396851:down|ssc:100152404,HEY2,100152404:down|ssc:100153176,SFRP5,100153176:down|ssc:100145894,JTB,100145894:up|ssc:100154195,-,100154195:down|ssc:780421,CMKLR1,780421:down|ssc:100155895,ARRDC4,100155895:down|ssc:397620,FN1,397620:down|ssc:100519335,IFT57,100519335:up|ssc:100154994,SERPINB10,100154994:down|ssc:100522360,-,100522360:down|ssc:654298,ID2,654298:down|ssc:100517086,C…	http://amigo.geneontology.org/cgi-bin/amigo/term_details?term=GO:0065009
positive regulation of protein transport	Biological Process	GO:0051222	14	68	0.000974873	0.0230891	ssc:100516027,SFRP2,100516027:down|ssc:100519746,DAB2,100519746:down|ssc:100517086,CSF1R,100517086:down|ssc:100156280,GREM1,100156280:down|ssc:100514142,GCK,100514142:up|ssc:397614,IL4R,397614:down|ssc:397094,IL1A,397094:down|ssc:100521992,HCLS1,100521992:down|ssc:100519703,F2RL1,100519703:down|ssc:397106,IL10,397106:down|ssc:100113425,BMP4,100113425:down|ssc:100518141,C2CD2L,100518141:down|ssc:3…	http://amigo.geneontology.org/cgi-bin/amigo/term_details?term=GO:0051222
regulation of homotypic cell-cell adhesion	Biological Process	GO:0034110	14	68	0.000974873	0.0230891	ssc:396927,ZP3,396927:up|ssc:100516458,TNFSF18,100516458:down|ssc:397492,DPP4,397492:down|ssc:397246,VNN1,397246:up|ssc:100153191,SIT1,100153191:up|ssc:445528,HLA-DMA,445528:down|ssc:397614,IL4R,397614:down|ssc:100525094,SASH3,100525094:down|ssc:100516296,EGR3,100516296:down|ssc:397271,AIF1,397271:down|ssc:100113425,BMP4,100113425:down|ssc:100038026,TNFSF13B,100038026:down|ssc:100271930,IL7R,1002…	http://amigo.geneontology.org/cgi-bin/amigo/term_details?term=GO:0034110
erythrocyte differentiation	Biological Process	GO:0030218	9	33	0.000975768	0.0230891	ssc:397093,INHBA,397093:down|ssc:654298,ID2,654298:down|ssc:100152462,ACVR1B,100152462:down|ssc:100155958,SRF,100155958:down|ssc:100521992,HCLS1,100521992:down|ssc:100622220,SLC25A38,100622220:up|ssc:100113425,BMP4,100113425:down|ssc:397201,JAK2,397201:down|ssc:100038002,ATPIF1,100038002:up	http://amigo.geneontology.org/cgi-bin/amigo/term_details?term=GO:0030218
negative regulation of cellular process	Biological Process	GO:0048523	110	1028	0.000980174	0.0230984	ssc:100270814,-,100270814:down|ssc:100286778,PDK4,100286778:down|ssc:100127155,LMO4,100127155:up|ssc:100522873,EPHA2,100522873:down|ssc:100621027,CX3CL1,100621027:down|ssc:100622059,KCTD11,100622059:down|ssc:494467,CXCL14,494467:down|ssc:100525983,DCUN1D3,100525983:down|ssc:100152404,HEY2,100152404:down|ssc:397492,DPP4,397492:down|ssc:100154607,S1PR3,100154607:down|ssc:100625349,MXD1,100625349:do…	http://amigo.geneontology.org/cgi-bin/amigo/term_details?term=GO:0048523
interleukin-6 production	Biological Process	GO:0032635	8	27	0.00102811	0.0240311	ssc:100627693,RAB7B,100627693:down|ssc:100515612,C5AR2,100515612:down|ssc:100516668,RABGEF1,100516668:down|ssc:100519703,F2RL1,100519703:down|ssc:397106,IL10,397106:down|ssc:397406,FCER1G,397406:down|ssc:396623,TLR2,396623:down|ssc:100521986,MAPKAPK2,100521986:down	http://amigo.geneontology.org/cgi-bin/amigo/term_details?term=GO:0032635
carbohydrate catabolic process	Biological Process	GO:0016052	8	27	0.00102811	0.0240311	ssc:100515931,PPP1R3B,100515931:down|ssc:100522855,HK3,100522855:down|ssc:397337,DHDH,397337:up|ssc:100514142,GCK,100514142:up|ssc:494561,HK2,494561:down|ssc:100124381,NEU1,100124381:down|ssc:397038,FBP1,397038:down|ssc:100515283,GM2A,100515283:down	http://amigo.geneontology.org/cgi-bin/amigo/term_details?term=GO:0016052
negative regulation of intracellular signal transduction	Biological Process	GO:1902532	19	108	0.00103528	0.0241007	ssc:100522873,EPHA2,100522873:down|ssc:100153176,SFRP5,100153176:down|ssc:100516668,RABGEF1,100516668:down|ssc:399503,LIF,399503:down|ssc:100625570,C3orf33,100625570:up|ssc:100525894,DUSP26,100525894:down|ssc:100113425,BMP4,100113425:down|ssc:100627019,ABL2,100627019:down|ssc:100518125,YBX3,100518125:up|ssc:100516027,SFRP2,100516027:down|ssc:733670,RGS2,733670:up|ssc:100516729,STAMBP,100516729:do…	http://amigo.geneontology.org/cgi-bin/amigo/term_details?term=GO:1902532
positive regulation of catalytic activity	Biological Process	GO:0043085	33	232	0.00105865	0.0244501	ssc:396927,ZP3,396927:up|ssc:396851,PIK3R5,396851:down|ssc:396628,VDR,396628:down|ssc:100127489,S100A9,100127489:down|ssc:100145894,JTB,100145894:up|ssc:100154195,-,100154195:down|ssc:100627352,FAM162A,100627352:up|ssc:100155895,ARRDC4,100155895:down|ssc:397201,JAK2,397201:down|ssc:397620,FN1,397620:down|ssc:100519335,IFT57,100519335:up|ssc:100627019,ABL2,100627019:down|ssc:100517086,CSF1R,100517…	http://amigo.geneontology.org/cgi-bin/amigo/term_details?term=GO:0043085
biomineral tissue development	Biological Process	GO:0031214	10	40	0.00108203	0.0244501	ssc:397649,LTF,397649:up|ssc:397102,AMBN,397102:down|ssc:100620511,CLEC3B,100620511:up|ssc:100127483,BMPR2,100127483:down|ssc:100516663,CREB3L1,100516663:down|ssc:100156280,GREM1,100156280:down|ssc:100624458,ANKH,100624458:down|ssc:414374,CCR1,414374:down|ssc:397087,SPP1,397087:down|ssc:100113425,BMP4,100113425:down	http://amigo.geneontology.org/cgi-bin/amigo/term_details?term=GO:0031214
leukocyte activation involved in immune response	Biological Process	GO:0002366	10	40	0.00108203	0.0244501	ssc:100516458,TNFSF18,100516458:down|ssc:100155631,FES,100155631:down|ssc:100511161,PLA2G3,100511161:down|ssc:100152253,STX11,100152253:down|ssc:100524561,PPBP,100524561:down|ssc:100516668,RABGEF1,100516668:down|ssc:100519703,F2RL1,100519703:down|ssc:397614,IL4R,397614:down|ssc:397405,TYROBP,397405:down|ssc:397406,FCER1G,397406:down	http://amigo.geneontology.org/cgi-bin/amigo/term_details?term=GO:0002366
cell activation involved in immune response	Biological Process	GO:0002263	10	40	0.00108203	0.0244501	ssc:100516458,TNFSF18,100516458:down|ssc:100155631,FES,100155631:down|ssc:100511161,PLA2G3,100511161:down|ssc:100152253,STX11,100152253:down|ssc:100524561,PPBP,100524561:down|ssc:100516668,RABGEF1,100516668:down|ssc:100519703,F2RL1,100519703:down|ssc:397614,IL4R,397614:down|ssc:397405,TYROBP,397405:down|ssc:397406,FCER1G,397406:down	http://amigo.geneontology.org/cgi-bin/amigo/term_details?term=GO:0002263
macrophage differentiation	Biological Process	GO:0030225	5	11	0.00108431	0.0244501	ssc:100521992,HCLS1,100521992:down|ssc:399503,LIF,399503:down|ssc:654298,ID2,654298:down|ssc:100156161,TSPAN2,100156161:down|ssc:100113425,BMP4,100113425:down	http://amigo.geneontology.org/cgi-bin/amigo/term_details?term=GO:0030225
positive regulation of fat cell differentiation	Biological Process	GO:0045600	5	11	0.00108431	0.0244501	ssc:100516027,SFRP2,100516027:down|ssc:100152419,FRZB,100152419:up|ssc:780421,CMKLR1,780421:down|ssc:100513746,NOCT,100513746:down|ssc:654298,ID2,654298:down	http://amigo.geneontology.org/cgi-bin/amigo/term_details?term=GO:0045600
peptidase activator activity	Molecular Function	GO:0016504	5	11	0.00108431	0.0244501	ssc:100516027,SFRP2,100516027:down|ssc:396969,CTSH,396969:down|ssc:100513283,APAF1,100513283:down|ssc:397620,FN1,397620:down|ssc:100522387,CTSC,100522387:up	http://amigo.geneontology.org/cgi-bin/amigo/term_details?term=GO:0016504
regulation of granulocyte chemotaxis	Biological Process	GO:0071622	5	11	0.00108431	0.0244501	ssc:780421,CMKLR1,780421:down|ssc:100621675,-,100621675:down|ssc:100620730,-,100620730:down|ssc:100515612,C5AR2,100515612:down|ssc:396880,-,396880:down	http://amigo.geneontology.org/cgi-bin/amigo/term_details?term=GO:0071622
positive regulation of lymphocyte activation	Biological Process	GO:0051251	12	54	0.00109797	0.0245655	ssc:396927,ZP3,396927:up|ssc:397492,DPP4,397492:down|ssc:397246,VNN1,397246:up|ssc:100134969,NFATC2,100134969:down|ssc:445528,HLA-DMA,445528:down|ssc:397614,IL4R,397614:down|ssc:100525094,SASH3,100525094:down|ssc:397271,AIF1,397271:down|ssc:100516296,EGR3,100516296:down|ssc:100038026,TNFSF13B,100038026:down|ssc:100271930,IL7R,100271930:down|ssc:397441,CD86,397441:down	http://amigo.geneontology.org/cgi-bin/amigo/term_details?term=GO:0051251
myeloid leukocyte differentiation	Biological Process	GO:0002573	12	54	0.00109797	0.0245655	ssc:397649,LTF,397649:up|ssc:100522873,EPHA2,100522873:down|ssc:654298,ID2,654298:down|ssc:100517086,CSF1R,100517086:down|ssc:100514999,PIR,100514999:up|ssc:414374,CCR1,414374:down|ssc:100519703,F2RL1,100519703:down|ssc:399503,LIF,399503:down|ssc:100521992,HCLS1,100521992:down|ssc:397405,TYROBP,397405:down|ssc:100113425,BMP4,100113425:down|ssc:100156161,TSPAN2,100156161:down	http://amigo.geneontology.org/cgi-bin/amigo/term_details?term=GO:0002573
response to stimulus	Biological Process	GO:0050896	219	2283	0.00110404	0.0245809	ssc:100519446,PLD1,100519446:down|ssc:100270814,-,100270814:down|ssc:100286778,PDK4,100286778:down|ssc:397122,IL1B1,397122:down|ssc:100621027,CX3CL1,100621027:down|ssc:396851,PIK3R5,396851:down|ssc:100622059,KCTD11,100622059:down|ssc:100152404,HEY2,100152404:down|ssc:100153460,AKAP5,100153460:down|ssc:100621675,-,100621675:down|ssc:396665,-,396665:down|ssc:780421,CMKLR1,780421:down|ssc:100037292,…	http://amigo.geneontology.org/cgi-bin/amigo/term_details?term=GO:0050896
tissue migration	Biological Process	GO:0090130	11	47	0.00111576	0.0245809	ssc:100522873,EPHA2,100522873:down|ssc:100127483,BMPR2,100127483:down|ssc:397492,DPP4,397492:down|ssc:100156280,GREM1,100156280:down|ssc:100511141,VASH1,100511141:down|ssc:397564,HBEGF,397564:down|ssc:100155958,SRF,100155958:down|ssc:396969,CTSH,396969:down|ssc:100113425,BMP4,100113425:down|ssc:100516296,EGR3,100516296:down|ssc:100169702,PROX1,100169702:down	http://amigo.geneontology.org/cgi-bin/amigo/term_details?term=GO:0090130
epithelial cell migration	Biological Process	GO:0010631	11	47	0.00111576	0.0245809	ssc:100522873,EPHA2,100522873:down|ssc:100127483,BMPR2,100127483:down|ssc:397492,DPP4,397492:down|ssc:100156280,GREM1,100156280:down|ssc:100511141,VASH1,100511141:down|ssc:397564,HBEGF,397564:down|ssc:100155958,SRF,100155958:down|ssc:396969,CTSH,396969:down|ssc:100113425,BMP4,100113425:down|ssc:100516296,EGR3,100516296:down|ssc:100169702,PROX1,100169702:down	http://amigo.geneontology.org/cgi-bin/amigo/term_details?term=GO:0010631
epithelium migration	Biological Process	GO:0090132	11	47	0.00111576	0.0245809	ssc:100522873,EPHA2,100522873:down|ssc:100127483,BMPR2,100127483:down|ssc:397492,DPP4,397492:down|ssc:100156280,GREM1,100156280:down|ssc:100511141,VASH1,100511141:down|ssc:397564,HBEGF,397564:down|ssc:100155958,SRF,100155958:down|ssc:396969,CTSH,396969:down|ssc:100113425,BMP4,100113425:down|ssc:100516296,EGR3,100516296:down|ssc:100169702,PROX1,100169702:down	http://amigo.geneontology.org/cgi-bin/amigo/term_details?term=GO:0090132
non-membrane spanning protein tyrosine kinase activity	Molecular Function	GO:0004715	6	16	0.00113118	0.0247878	ssc:100627308,-,100627308:down|ssc:100521487,WEE1,100521487:down|ssc:100155631,FES,100155631:down|ssc:397201,JAK2,397201:down|ssc:100517988,-,100517988:down|ssc:100627019,ABL2,100627019:down	http://amigo.geneontology.org/cgi-bin/amigo/term_details?term=GO:0004715
kidney development	Biological Process	GO:0001822	14	69	0.00113377	0.0247878	ssc:654298,ID2,654298:down|ssc:100156280,GREM1,100156280:down|ssc:397495,BDNF,397495:down|ssc:100521305,SMAD7,100521305:down|ssc:403163,EPCAM,403163:down|ssc:100622249,ARID5B,100622249:down|ssc:396969,CTSH,396969:down|ssc:399503,LIF,399503:down|ssc:100113425,BMP4,100113425:down|ssc:100169702,PROX1,100169702:down|ssc:100511536,MME,100511536:down|ssc:100157004,GCNT1,100157004:down|ssc:397497,FGF1,3…	http://amigo.geneontology.org/cgi-bin/amigo/term_details?term=GO:0001822
signal transduction	Biological Process	GO:0007165	163	1630	0.00115775	0.0252161	ssc:100270814,-,100270814:down|ssc:100286778,PDK4,100286778:down|ssc:397122,IL1B1,397122:down|ssc:100621027,CX3CL1,100621027:down|ssc:396851,PIK3R5,396851:down|ssc:100622059,KCTD11,100622059:down|ssc:100152404,HEY2,100152404:down|ssc:100153460,AKAP5,100153460:down|ssc:100621675,-,100621675:down|ssc:396665,-,396665:down|ssc:780421,CMKLR1,780421:down|ssc:100037292,ACKR4,100037292:down|ssc:100144523…	http://amigo.geneontology.org/cgi-bin/amigo/term_details?term=GO:0007165
positive regulation of secretion	Biological Process	GO:0051047	13	62	0.00122788	0.026116	ssc:396927,ZP3,396927:up|ssc:100127489,S100A9,100127489:down|ssc:100517086,CSF1R,100517086:down|ssc:100049663,EDN3,100049663:up|ssc:100514142,GCK,100514142:up|ssc:397614,IL4R,397614:down|ssc:397094,IL1A,397094:down|ssc:100519703,F2RL1,100519703:down|ssc:397106,IL10,397106:down|ssc:100518141,C2CD2L,100518141:down|ssc:397406,FCER1G,397406:down|ssc:396623,TLR2,396623:down|ssc:100627019,ABL2,10062701…	http://amigo.geneontology.org/cgi-bin/amigo/term_details?term=GO:0051047
cytokine receptor activity	Molecular Function	GO:0004896	9	34	0.00123289	0.026116	ssc:414375,XCR1,414375:down|ssc:414374,CCR1,414374:down|ssc:780421,CMKLR1,780421:down|ssc:100737352,ACKR2,100737352:down|ssc:414372,CCR2,414372:down|ssc:397614,IL4R,397614:down|ssc:100037292,ACKR4,100037292:down|ssc:414371,CCR5,414371:down|ssc:100271930,IL7R,100271930:down	http://amigo.geneontology.org/cgi-bin/amigo/term_details?term=GO:0004896
negative regulation of signal transduction	Biological Process	GO:0009968	35	253	0.00124716	0.026116	ssc:100522873,EPHA2,100522873:down|ssc:100621027,CX3CL1,100621027:down|ssc:100622059,KCTD11,100622059:down|ssc:100152404,HEY2,100152404:down|ssc:100153176,SFRP5,100153176:down|ssc:100144523,PMEPA1,100144523:down|ssc:100627019,ABL2,100627019:down|ssc:100518125,YBX3,100518125:up|ssc:100152419,FRZB,100152419:up|ssc:100525762,DDIT4L,100525762:down|ssc:733670,RGS2,733670:up|ssc:100156280,GREM1,1001562…	http://amigo.geneontology.org/cgi-bin/amigo/term_details?term=GO:0009968
Wnt signaling pathway, planar cell polarity pathway	Biological Process	GO:0060071	4	7	0.00125811	0.026116	ssc:100516027,SFRP2,100516027:down|ssc:100519746,DAB2,100519746:down|ssc:100627019,ABL2,100627019:down|ssc:100153176,SFRP5,100153176:down	http://amigo.geneontology.org/cgi-bin/amigo/term_details?term=GO:0060071
negative regulation of stem cell proliferation	Biological Process	GO:2000647	4	7	0.00125811	0.026116	ssc:100622059,KCTD11,100622059:down|ssc:100113425,BMP4,100113425:down|ssc:397495,BDNF,397495:down|ssc:100155995,NFIB,100155995:up	http://amigo.geneontology.org/cgi-bin/amigo/term_details?term=GO:2000647
neutrophil mediated immunity	Biological Process	GO:0002446	4	7	0.00125811	0.026116	ssc:396900,AMCF-II,396900:down|ssc:100519703,F2RL1,100519703:down|ssc:100152253,STX11,100152253:down|ssc:100524561,PPBP,100524561:down	http://amigo.geneontology.org/cgi-bin/amigo/term_details?term=GO:0002446
tyrosine phosphorylation of Stat3 protein	Biological Process	GO:0042503	4	7	0.00125811	0.026116	ssc:100152038,OSM,100152038:down|ssc:399503,LIF,399503:down|ssc:397201,JAK2,397201:down|ssc:100517086,CSF1R,100517086:down	http://amigo.geneontology.org/cgi-bin/amigo/term_details?term=GO:0042503
regulation of establishment of planar polarity	Biological Process	GO:0090175	4	7	0.00125811	0.026116	ssc:100516027,SFRP2,100516027:down|ssc:100519746,DAB2,100519746:down|ssc:100627019,ABL2,100627019:down|ssc:100153176,SFRP5,100153176:down	http://amigo.geneontology.org/cgi-bin/amigo/term_details?term=GO:0090175
regulation of neutrophil migration	Biological Process	GO:1902622	4	7	0.00125811	0.026116	ssc:100621675,-,100621675:down|ssc:100620730,-,100620730:down|ssc:100515612,C5AR2,100515612:down|ssc:396880,-,396880:down	http://amigo.geneontology.org/cgi-bin/amigo/term_details?term=GO:1902622
mast cell activation	Biological Process	GO:0045576	4	7	0.00125811	0.026116	ssc:100516668,RABGEF1,100516668:down|ssc:100155631,FES,100155631:down|ssc:100511161,PLA2G3,100511161:down|ssc:397406,FCER1G,397406:down	http://amigo.geneontology.org/cgi-bin/amigo/term_details?term=GO:0045576
positive regulation of cytokine production involved in immune response	Biological Process	GO:0002720	4	7	0.00125811	0.026116	ssc:100519703,F2RL1,100519703:down|ssc:100525094,SASH3,100525094:down|ssc:396623,TLR2,396623:down|ssc:397406,FCER1G,397406:down	http://amigo.geneontology.org/cgi-bin/amigo/term_details?term=GO:0002720
regulation of regulated secretory pathway	Biological Process	GO:1903305	4	7	0.00125811	0.026116	ssc:100516668,RABGEF1,100516668:down|ssc:100519703,F2RL1,100519703:down|ssc:100155631,FES,100155631:down|ssc:397406,FCER1G,397406:down	http://amigo.geneontology.org/cgi-bin/amigo/term_details?term=GO:1903305
regulation of neutrophil chemotaxis	Biological Process	GO:0090022	4	7	0.00125811	0.026116	ssc:100621675,-,100621675:down|ssc:100620730,-,100620730:down|ssc:100515612,C5AR2,100515612:down|ssc:396880,-,396880:down	http://amigo.geneontology.org/cgi-bin/amigo/term_details?term=GO:0090022
regulation of apoptotic process	Biological Process	GO:0042981	44	340	0.00126738	0.0262137	ssc:100153411,BCL10B,100153411:down|ssc:100286778,PDK4,100286778:down|ssc:100621027,CX3CL1,100621027:down|ssc:396628,VDR,396628:down|ssc:100127489,S100A9,100127489:down|ssc:100525983,DCUN1D3,100525983:down|ssc:100152404,HEY2,100152404:down|ssc:100156860,BCL2A1,100156860:down|ssc:100521992,HCLS1,100521992:down|ssc:100152038,OSM,100152038:down|ssc:100627352,FAM162A,100627352:up|ssc:100519335,IFT57,…	http://amigo.geneontology.org/cgi-bin/amigo/term_details?term=GO:0042981
proteinaceous extracellular matrix	Cellular Component	GO:0005578	12	55	0.0013028	0.0268119	ssc:100154395,NOV,100154395:down|ssc:397102,AMBN,397102:down|ssc:396927,ZP3,396927:up|ssc:100152401,POSTN,100152401:down|ssc:397320,MMP1,397320:down|ssc:100037275,SPARCL1,100037275:up|ssc:100153791,CYR61,100153791:down|ssc:396846,ZP2,396846:up|ssc:445513,HAPLN1,445513:up|ssc:100520218,ADAMTS9,100520218:down|ssc:397497,FGF1,397497:down|ssc:397620,FN1,397620:down	http://amigo.geneontology.org/cgi-bin/amigo/term_details?term=GO:0005578
protein tyrosine kinase activity	Molecular Function	GO:0004713	10	41	0.00132877	0.0268119	ssc:100522873,EPHA2,100522873:down|ssc:100627308,-,100627308:down|ssc:100155631,FES,100155631:down|ssc:100517988,-,100517988:down|ssc:100517086,CSF1R,100517086:down|ssc:100157507,PTK2B,100157507:down|ssc:100521487,WEE1,100521487:down|ssc:397201,JAK2,397201:down|ssc:397311,KDR,397311:down|ssc:100627019,ABL2,100627019:down	http://amigo.geneontology.org/cgi-bin/amigo/term_details?term=GO:0004713
chemokine receptor activity	Molecular Function	GO:0004950	7	22	0.00133606	0.0268119	ssc:414372,CCR2,414372:down|ssc:100737352,ACKR2,100737352:down|ssc:780421,CMKLR1,780421:down|ssc:414375,XCR1,414375:down|ssc:414371,CCR5,414371:down|ssc:100037292,ACKR4,100037292:down|ssc:414374,CCR1,414374:down	http://amigo.geneontology.org/cgi-bin/amigo/term_details?term=GO:0004950
G-protein coupled chemoattractant receptor activity	Molecular Function	GO:0001637	7	22	0.00133606	0.0268119	ssc:414372,CCR2,414372:down|ssc:100737352,ACKR2,100737352:down|ssc:780421,CMKLR1,780421:down|ssc:414375,XCR1,414375:down|ssc:414371,CCR5,414371:down|ssc:100037292,ACKR4,100037292:down|ssc:414374,CCR1,414374:down	http://amigo.geneontology.org/cgi-bin/amigo/term_details?term=GO:0001637
leukocyte mediated cytotoxicity	Biological Process	GO:0001909	7	22	0.00133606	0.0268119	ssc:396900,AMCF-II,396900:down|ssc:100519703,F2RL1,100519703:down|ssc:396969,CTSH,396969:down|ssc:100271930,IL7R,100271930:down|ssc:100621544,RNF19B,100621544:down|ssc:100522387,CTSC,100522387:up|ssc:100152253,STX11,100152253:down	http://amigo.geneontology.org/cgi-bin/amigo/term_details?term=GO:0001909
regulation of tumor necrosis factor production	Biological Process	GO:0032680	8	28	0.00133826	0.0268119	ssc:397649,LTF,397649:up|ssc:100515612,C5AR2,100515612:down|ssc:100154350,NFKBIL1,100154350:up|ssc:100525094,SASH3,100525094:down|ssc:397106,IL10,397106:down|ssc:397406,FCER1G,397406:down|ssc:396623,TLR2,396623:down|ssc:100521986,MAPKAPK2,100521986:down	http://amigo.geneontology.org/cgi-bin/amigo/term_details?term=GO:0032680
tumor necrosis factor superfamily cytokine production	Biological Process	GO:0071706	8	28	0.00133826	0.0268119	ssc:397649,LTF,397649:up|ssc:100515612,C5AR2,100515612:down|ssc:100154350,NFKBIL1,100154350:up|ssc:100525094,SASH3,100525094:down|ssc:397106,IL10,397106:down|ssc:397406,FCER1G,397406:down|ssc:396623,TLR2,396623:down|ssc:100521986,MAPKAPK2,100521986:down	http://amigo.geneontology.org/cgi-bin/amigo/term_details?term=GO:0071706
regulation of tumor necrosis factor superfamily cytokine production	Biological Process	GO:1903555	8	28	0.00133826	0.0268119	ssc:397649,LTF,397649:up|ssc:100515612,C5AR2,100515612:down|ssc:100154350,NFKBIL1,100154350:up|ssc:100525094,SASH3,100525094:down|ssc:397106,IL10,397106:down|ssc:397406,FCER1G,397406:down|ssc:396623,TLR2,396623:down|ssc:100521986,MAPKAPK2,100521986:down	http://amigo.geneontology.org/cgi-bin/amigo/term_details?term=GO:1903555
tumor necrosis factor production	Biological Process	GO:0032640	8	28	0.00133826	0.0268119	ssc:397649,LTF,397649:up|ssc:100515612,C5AR2,100515612:down|ssc:100154350,NFKBIL1,100154350:up|ssc:100525094,SASH3,100525094:down|ssc:397106,IL10,397106:down|ssc:397406,FCER1G,397406:down|ssc:396623,TLR2,396623:down|ssc:100521986,MAPKAPK2,100521986:down	http://amigo.geneontology.org/cgi-bin/amigo/term_details?term=GO:0032640
regulation of programmed cell death	Biological Process	GO:0043067	44	342	0.00142852	0.0285209	ssc:100153411,BCL10B,100153411:down|ssc:100286778,PDK4,100286778:down|ssc:100621027,CX3CL1,100621027:down|ssc:396628,VDR,396628:down|ssc:100127489,S100A9,100127489:down|ssc:100525983,DCUN1D3,100525983:down|ssc:100152404,HEY2,100152404:down|ssc:100156860,BCL2A1,100156860:down|ssc:100521992,HCLS1,100521992:down|ssc:100152038,OSM,100152038:down|ssc:100627352,FAM162A,100627352:up|ssc:100519335,IFT57,…	http://amigo.geneontology.org/cgi-bin/amigo/term_details?term=GO:0043067
defense response to bacterium	Biological Process	GO:0042742	13	63	0.00143475	0.0285461	ssc:100519446,PLD1,100519446:down|ssc:100521232,DEFB123,100521232:up|ssc:399541,TLR4,399541:down|ssc:397649,LTF,397649:up|ssc:396900,AMCF-II,396900:down|ssc:100157211,LYZ,100157211:down|ssc:100514958,SLAMF8,100514958:down|ssc:100519703,F2RL1,100519703:down|ssc:574055,TNFSF8,574055:down|ssc:397106,IL10,397106:down|ssc:100156932,-,100156932:down|ssc:397406,FCER1G,397406:down|ssc:396623,TLR2,396623:…	http://amigo.geneontology.org/cgi-bin/amigo/term_details?term=GO:0042742
regulation of protein modification process	Biological Process	GO:0031399	48	382	0.00145846	0.0288363	ssc:100270814,-,100270814:down|ssc:100524615,ARID5A,100524615:down|ssc:397122,IL1B1,397122:down|ssc:396927,ZP3,396927:up|ssc:100522873,EPHA2,100522873:down|ssc:396851,PIK3R5,396851:down|ssc:100523837,PRR5L,100523837:down|ssc:100153176,SFRP5,100153176:down|ssc:100145894,JTB,100145894:up|ssc:100521992,HCLS1,100521992:down|ssc:100152038,OSM,100152038:down|ssc:100144523,PMEPA1,100144523:down|ssc:1001…	http://amigo.geneontology.org/cgi-bin/amigo/term_details?term=GO:0031399
regulation of secretion by cell	Biological Process	GO:1903530	21	128	0.00145937	0.0288363	ssc:399541,TLR4,399541:down|ssc:396927,ZP3,396927:up|ssc:100515612,C5AR2,100515612:down|ssc:100516668,RABGEF1,100516668:down|ssc:100514142,GCK,100514142:up|ssc:100152038,OSM,100152038:down|ssc:399503,LIF,399503:down|ssc:100627019,ABL2,100627019:down|ssc:397093,INHBA,397093:down|ssc:100738470,NDUFAF2,100738470:up|ssc:100155631,FES,100155631:down|ssc:100517086,CSF1R,100517086:down|ssc:100049663,EDN…	http://amigo.geneontology.org/cgi-bin/amigo/term_details?term=GO:1903530
innate immune response	Biological Process	GO:0045087	22	137	0.00151394	0.0297539	ssc:100521232,DEFB123,100521232:up|ssc:399541,TLR4,399541:down|ssc:100627693,RAB7B,100627693:down|ssc:100627308,-,100627308:down|ssc:100127489,S100A9,100127489:down|ssc:100154350,NFKBIL1,100154350:up|ssc:397316,-,397316:down|ssc:397201,JAK2,397201:down|ssc:100627019,ABL2,100627019:down|ssc:397649,LTF,397649:up|ssc:100038025,CLEC7A,100038025:down|ssc:100155631,FES,100155631:down|ssc:100517988,-,10…	http://amigo.geneontology.org/cgi-bin/amigo/term_details?term=GO:0045087
regulation of blood circulation	Biological Process	GO:1903522	12	56	0.00153824	0.0297539	ssc:396724,OLR1,396724:down|ssc:100621502,-,100621502:up|ssc:100127483,BMPR2,100127483:down|ssc:733670,RGS2,733670:up|ssc:100152404,HEY2,100152404:down|ssc:100049663,EDN3,100049663:up|ssc:100623651,DSC2,100623651:down|ssc:397564,HBEGF,397564:down|ssc:100521305,SMAD7,100521305:down|ssc:100519703,F2RL1,100519703:down|ssc:100522131,FKBP1B,100522131:down|ssc:396915,EDN1,396915:down	http://amigo.geneontology.org/cgi-bin/amigo/term_details?term=GO:1903522
negative regulation of sequence-specific DNA binding transcription factor activity	Biological Process	GO:0043433	9	35	0.00154203	0.0297539	ssc:396951,PTHLH,396951:up|ssc:654298,ID2,654298:down|ssc:100153176,SFRP5,100153176:down|ssc:100154350,NFKBIL1,100154350:up|ssc:100521305,SMAD7,100521305:down|ssc:780421,CMKLR1,780421:down|ssc:100522839,ID1,100522839:up|ssc:100169702,PROX1,100169702:down|ssc:397680,NR0B1,397680:up	http://amigo.geneontology.org/cgi-bin/amigo/term_details?term=GO:0043433
heparin binding	Molecular Function	GO:0008201	9	35	0.00154203	0.0297539	ssc:100154395,NOV,100154395:down|ssc:100620511,CLEC3B,100620511:up|ssc:100152401,POSTN,100152401:down|ssc:100153791,CYR61,100153791:down|ssc:397564,HBEGF,397564:down|ssc:397609,PTF-BETA,397609:up|ssc:396806,BSP1,396806:up|ssc:100113425,BMP4,100113425:down|ssc:397497,FGF1,397497:down	http://amigo.geneontology.org/cgi-bin/amigo/term_details?term=GO:0008201
immune response-regulating cell surface receptor signaling pathway	Biological Process	GO:0002768	9	35	0.00154203	0.0297539	ssc:100627864,LAT2,100627864:down|ssc:100627308,-,100627308:down|ssc:397166,MS4A2,397166:down|ssc:100517988,-,100517988:down|ssc:100134969,NFATC2,100134969:down|ssc:100516668,RABGEF1,100516668:down|ssc:100620216,-,100620216:down|ssc:397406,FCER1G,397406:down|ssc:396623,TLR2,396623:down	http://amigo.geneontology.org/cgi-bin/amigo/term_details?term=GO:0002768
cell adhesion molecule binding	Molecular Function	GO:0050839	9	35	0.00154203	0.0297539	ssc:100154395,NOV,100154395:down|ssc:100519746,DAB2,100519746:down|ssc:100155091,ITGA5,100155091:down|ssc:100152401,POSTN,100152401:down|ssc:100154607,S1PR3,100154607:down|ssc:100127147,SELL,100127147:down|ssc:100153791,CYR61,100153791:down|ssc:397620,FN1,397620:down|ssc:397063,ITGB3,397063:down	http://amigo.geneontology.org/cgi-bin/amigo/term_details?term=GO:0050839
erythrocyte homeostasis	Biological Process	GO:0034101	9	35	0.00154203	0.0297539	ssc:397093,INHBA,397093:down|ssc:654298,ID2,654298:down|ssc:100152462,ACVR1B,100152462:down|ssc:100155958,SRF,100155958:down|ssc:100521992,HCLS1,100521992:down|ssc:100622220,SLC25A38,100622220:up|ssc:100113425,BMP4,100113425:down|ssc:397201,JAK2,397201:down|ssc:100038002,ATPIF1,100038002:up	http://amigo.geneontology.org/cgi-bin/amigo/term_details?term=GO:0034101
serine-type endopeptidase activity	Molecular Function	GO:0004252	10	42	0.00161945	0.0310505	ssc:100620361,-,100620361:down|ssc:100621642,-,100621642:up|ssc:100517601,RHBDF2,100517601:down|ssc:396985,PLAU,396985:down|ssc:397492,DPP4,397492:down|ssc:100522387,CTSC,100522387:up|ssc:100156882,FURIN,100156882:down|ssc:396766,CELA1,396766:up|ssc:396969,CTSH,396969:down|ssc:100156168,PRSS35,100156168:down	http://amigo.geneontology.org/cgi-bin/amigo/term_details?term=GO:0004252
endocytosis	Biological Process	GO:0006897	19	112	0.00162002	0.0310505	ssc:100627693,RAB7B,100627693:down|ssc:100621457,-,100621457:down|ssc:100516668,RABGEF1,100516668:down|ssc:100737352,ACKR2,100737352:down|ssc:100522109,ELMO1,100522109:down|ssc:100037292,ACKR4,100037292:down|ssc:100627019,ABL2,100627019:down|ssc:100038025,CLEC7A,100038025:down|ssc:397263,CLCN5,397263:down|ssc:100519746,DAB2,100519746:down|ssc:100524095,PLD4,100524095:down|ssc:100156280,GREM1,1001…	http://amigo.geneontology.org/cgi-bin/amigo/term_details?term=GO:0006897
regulation of secretion	Biological Process	GO:0051046	22	138	0.00166741	0.0318525	ssc:399541,TLR4,399541:down|ssc:396927,ZP3,396927:up|ssc:100127489,S100A9,100127489:down|ssc:100515612,C5AR2,100515612:down|ssc:100516668,RABGEF1,100516668:down|ssc:100514142,GCK,100514142:up|ssc:100152038,OSM,100152038:down|ssc:399503,LIF,399503:down|ssc:100627019,ABL2,100627019:down|ssc:397093,INHBA,397093:down|ssc:100738470,NDUFAF2,100738470:up|ssc:100155631,FES,100155631:down|ssc:100517086,CS…	http://amigo.geneontology.org/cgi-bin/amigo/term_details?term=GO:0051046
negative regulation of cell proliferation	Biological Process	GO:0008285	24	156	0.00172765	0.032894	ssc:100622059,KCTD11,100622059:down|ssc:396628,VDR,396628:down|ssc:100127483,BMPR2,100127483:down|ssc:397495,BDNF,397495:down|ssc:100153176,SFRP5,100153176:down|ssc:100511141,VASH1,100511141:down|ssc:100152038,OSM,100152038:down|ssc:399503,LIF,399503:down|ssc:100113425,BMP4,100113425:down|ssc:100169702,PROX1,100169702:down|ssc:100519335,IFT57,100519335:up|ssc:100516027,SFRP2,100516027:down|ssc:39…	http://amigo.geneontology.org/cgi-bin/amigo/term_details?term=GO:0008285
regulation of sequence-specific DNA binding transcription factor activity	Biological Process	GO:0051090	17	96	0.00174016	0.0330228	ssc:100627693,RAB7B,100627693:down|ssc:396951,PTHLH,396951:up|ssc:100516458,TNFSF18,100516458:down|ssc:100153176,SFRP5,100153176:down|ssc:100154350,NFKBIL1,100154350:up|ssc:780421,CMKLR1,780421:down|ssc:100622249,ARID5B,100622249:down|ssc:100155958,SRF,100155958:down|ssc:100625570,C3orf33,100625570:up|ssc:100169702,PROX1,100169702:down|ssc:654298,ID2,654298:down|ssc:100156280,GREM1,100156280:down…	http://amigo.geneontology.org/cgi-bin/amigo/term_details?term=GO:0051090
negative regulation of phosphorus metabolic process	Biological Process	GO:0010563	21	130	0.00178229	0.0336005	ssc:100523837,PRR5L,100523837:down|ssc:100517189,CTDSPL,100517189:up|ssc:100153176,SFRP5,100153176:down|ssc:100516668,RABGEF1,100516668:down|ssc:399503,LIF,399503:down|ssc:100144523,PMEPA1,100144523:down|ssc:100625570,C3orf33,100625570:up|ssc:100525894,DUSP26,100525894:down|ssc:100113425,BMP4,100113425:down|ssc:100516027,SFRP2,100516027:down|ssc:733670,RGS2,733670:up|ssc:100156280,GREM1,100156280…	http://amigo.geneontology.org/cgi-bin/amigo/term_details?term=GO:0010563
negative regulation of phosphate metabolic process	Biological Process	GO:0045936	21	130	0.00178229	0.0336005	ssc:100523837,PRR5L,100523837:down|ssc:100517189,CTDSPL,100517189:up|ssc:100153176,SFRP5,100153176:down|ssc:100516668,RABGEF1,100516668:down|ssc:399503,LIF,399503:down|ssc:100144523,PMEPA1,100144523:down|ssc:100625570,C3orf33,100625570:up|ssc:100525894,DUSP26,100525894:down|ssc:100113425,BMP4,100113425:down|ssc:100516027,SFRP2,100516027:down|ssc:733670,RGS2,733670:up|ssc:100156280,GREM1,100156280…	http://amigo.geneontology.org/cgi-bin/amigo/term_details?term=GO:0045936
regulation of vasculature development	Biological Process	GO:1901342	12	57	0.00180767	0.0339676	ssc:100516027,SFRP2,100516027:down|ssc:100522873,EPHA2,100522873:down|ssc:100621027,CX3CL1,100621027:down|ssc:100152404,HEY2,100152404:down|ssc:396865,CHI3L1,396865:down|ssc:100156280,GREM1,100156280:down|ssc:100511141,VASH1,100511141:down|ssc:396969,CTSH,396969:down|ssc:100522839,ID1,100522839:up|ssc:397094,IL1A,397094:down|ssc:100113425,BMP4,100113425:down|ssc:397497,FGF1,397497:down	http://amigo.geneontology.org/cgi-bin/amigo/term_details?term=GO:1901342
regulation of osteoblast differentiation	Biological Process	GO:0045667	9	36	0.00191044	0.0357818	ssc:100516027,SFRP2,100516027:down|ssc:397649,LTF,397649:up|ssc:100127483,BMPR2,100127483:down|ssc:654298,ID2,654298:down|ssc:100153791,CYR61,100153791:down|ssc:654297,CITED1,654297:up|ssc:100522839,ID1,100522839:up|ssc:100513746,NOCT,100513746:down|ssc:100113425,BMP4,100113425:down	http://amigo.geneontology.org/cgi-bin/amigo/term_details?term=GO:0045667
cellular response to stimulus	Biological Process	GO:0051716	186	1916	0.0019764	0.0365195	ssc:100270814,-,100270814:down|ssc:100286778,PDK4,100286778:down|ssc:397122,IL1B1,397122:down|ssc:100621027,CX3CL1,100621027:down|ssc:396851,PIK3R5,396851:down|ssc:100622059,KCTD11,100622059:down|ssc:100152404,HEY2,100152404:down|ssc:100153460,AKAP5,100153460:down|ssc:100621675,-,100621675:down|ssc:396665,-,396665:down|ssc:780421,CMKLR1,780421:down|ssc:100037292,ACKR4,100037292:down|ssc:100144523…	http://amigo.geneontology.org/cgi-bin/amigo/term_details?term=GO:0051716
renal system development	Biological Process	GO:0072001	14	73	0.00200319	0.0365195	ssc:654298,ID2,654298:down|ssc:100156280,GREM1,100156280:down|ssc:397495,BDNF,397495:down|ssc:100521305,SMAD7,100521305:down|ssc:403163,EPCAM,403163:down|ssc:100622249,ARID5B,100622249:down|ssc:396969,CTSH,396969:down|ssc:399503,LIF,399503:down|ssc:100113425,BMP4,100113425:down|ssc:100169702,PROX1,100169702:down|ssc:100511536,MME,100511536:down|ssc:100157004,GCNT1,100157004:down|ssc:397497,FGF1,3…	http://amigo.geneontology.org/cgi-bin/amigo/term_details?term=GO:0072001
response to oxygen-containing compound	Biological Process	GO:1901700	35	260	0.00201454	0.0365195	ssc:399541,TLR4,399541:down|ssc:100286778,PDK4,100286778:down|ssc:396628,VDR,396628:down|ssc:100524561,PPBP,100524561:down|ssc:100524418,PTGDR,100524418:down|ssc:397201,JAK2,397201:down|ssc:100620216,-,100620216:down|ssc:100153960,NR1H4,100153960:up|ssc:100627019,ABL2,100627019:down|ssc:100154394,ROMO1,100154394:up|ssc:100127164,PTGER2,100127164:down|ssc:397087,SPP1,397087:down|ssc:100522131,FKBP…	http://amigo.geneontology.org/cgi-bin/amigo/term_details?term=GO:1901700
regulation of mast cell degranulation	Biological Process	GO:0043304	3	4	0.00203239	0.0365195	ssc:100516668,RABGEF1,100516668:down|ssc:100155631,FES,100155631:down|ssc:397406,FCER1G,397406:down	http://amigo.geneontology.org/cgi-bin/amigo/term_details?term=GO:0043304
antigen processing and presentation of exogenous peptide antigen via MHC class II	Biological Process	GO:0019886	3	4	0.00203239	0.0365195	ssc:445528,HLA-DMA,445528:down|ssc:100174943,IFI30,100174943:down|ssc:397406,FCER1G,397406:down	http://amigo.geneontology.org/cgi-bin/amigo/term_details?term=GO:0019886
regulation of chemokine secretion	Biological Process	GO:0090196	3	4	0.00203239	0.0365195	ssc:100519703,F2RL1,100519703:down|ssc:397614,IL4R,397614:down|ssc:100517086,CSF1R,100517086:down	http://amigo.geneontology.org/cgi-bin/amigo/term_details?term=GO:0090196
chemokine secretion	Biological Process	GO:0090195	3	4	0.00203239	0.0365195	ssc:100519703,F2RL1,100519703:down|ssc:397614,IL4R,397614:down|ssc:100517086,CSF1R,100517086:down	http://amigo.geneontology.org/cgi-bin/amigo/term_details?term=GO:0090195
MHC class II protein complex	Cellular Component	GO:0042613	3	4	0.00203239	0.0365195	ssc:445528,HLA-DMA,445528:down|ssc:100135050,SLA-DMB,100135050:down|ssc:100037921,SLA-DQB1,100037921:down	http://amigo.geneontology.org/cgi-bin/amigo/term_details?term=GO:0042613
regulation of cholesterol biosynthetic process	Biological Process	GO:0045540	3	4	0.00203239	0.0365195	ssc:494015,SCAP,494015:up|ssc:397497,FGF1,397497:down|ssc:100152963,PEX2,100152963:up	http://amigo.geneontology.org/cgi-bin/amigo/term_details?term=GO:0045540
positive regulation of macrophage differentiation	Biological Process	GO:0045651	3	4	0.00203239	0.0365195	ssc:100521992,HCLS1,100521992:down|ssc:399503,LIF,399503:down|ssc:654298,ID2,654298:down	http://amigo.geneontology.org/cgi-bin/amigo/term_details?term=GO:0045651
regulation of mast cell activation involved in immune response	Biological Process	GO:0033006	3	4	0.00203239	0.0365195	ssc:100516668,RABGEF1,100516668:down|ssc:100155631,FES,100155631:down|ssc:397406,FCER1G,397406:down	http://amigo.geneontology.org/cgi-bin/amigo/term_details?term=GO:0033006
regulation of bone development	Biological Process	GO:1903010	3	4	0.00203239	0.0365195	ssc:397649,LTF,397649:up|ssc:397405,TYROBP,397405:down|ssc:100156280,GREM1,100156280:down	http://amigo.geneontology.org/cgi-bin/amigo/term_details?term=GO:1903010
convergent extension	Biological Process	GO:0060026	3	4	0.00203239	0.0365195	ssc:100516027,SFRP2,100516027:down|ssc:100152419,FRZB,100152419:up|ssc:100153176,SFRP5,100153176:down	http://amigo.geneontology.org/cgi-bin/amigo/term_details?term=GO:0060026
immune response-activating cell surface receptor signaling pathway	Biological Process	GO:0002429	8	30	0.00217909	0.0390336	ssc:100627864,LAT2,100627864:down|ssc:100627308,-,100627308:down|ssc:100517988,-,100517988:down|ssc:100134969,NFATC2,100134969:down|ssc:100516668,RABGEF1,100516668:down|ssc:100620216,-,100620216:down|ssc:397406,FCER1G,397406:down|ssc:396623,TLR2,396623:down	http://amigo.geneontology.org/cgi-bin/amigo/term_details?term=GO:0002429
lysosome	Cellular Component	GO:0005764	19	115	0.00222423	0.0395954	ssc:100519446,PLD1,100519446:down|ssc:100627693,RAB7B,100627693:down|ssc:100621457,-,100621457:down|ssc:397492,DPP4,397492:down|ssc:445528,HLA-DMA,445528:down|ssc:100519240,MFSD12,100519240:down|ssc:100624193,LAPTM5,100624193:down|ssc:100513526,MARCH3,100513526:down|ssc:100620759,-,100620759:up|ssc:397263,CLCN5,397263:down|ssc:100511161,PLA2G3,100511161:down|ssc:100174943,IFI30,100174943:down|ssc…	http://amigo.geneontology.org/cgi-bin/amigo/term_details?term=GO:0005764
lytic vacuole	Cellular Component	GO:0000323	19	115	0.00222423	0.0395954	ssc:100519446,PLD1,100519446:down|ssc:100627693,RAB7B,100627693:down|ssc:100621457,-,100621457:down|ssc:397492,DPP4,397492:down|ssc:445528,HLA-DMA,445528:down|ssc:100519240,MFSD12,100519240:down|ssc:100624193,LAPTM5,100624193:down|ssc:100513526,MARCH3,100513526:down|ssc:100620759,-,100620759:up|ssc:397263,CLCN5,397263:down|ssc:100511161,PLA2G3,100511161:down|ssc:100174943,IFI30,100174943:down|ssc…	http://amigo.geneontology.org/cgi-bin/amigo/term_details?term=GO:0000323
regulation of catalytic activity	Biological Process	GO:0050790	54	451	0.00225691	0.0400531	ssc:396927,ZP3,396927:up|ssc:396851,PIK3R5,396851:down|ssc:396628,VDR,396628:down|ssc:100127489,S100A9,100127489:down|ssc:100153176,SFRP5,100153176:down|ssc:100145894,JTB,100145894:up|ssc:100514958,SLAMF8,100514958:down|ssc:100154195,-,100154195:down|ssc:100627352,FAM162A,100627352:up|ssc:100155895,ARRDC4,100155895:down|ssc:397201,JAK2,397201:down|ssc:397620,FN1,397620:down|ssc:100622572,-,100622…	http://amigo.geneontology.org/cgi-bin/amigo/term_details?term=GO:0050790
regulation of cell death	Biological Process	GO:0010941	45	360	0.00226977	0.0401575	ssc:100153411,BCL10B,100153411:down|ssc:100286778,PDK4,100286778:down|ssc:100621027,CX3CL1,100621027:down|ssc:396628,VDR,396628:down|ssc:100127489,S100A9,100127489:down|ssc:100525983,DCUN1D3,100525983:down|ssc:100152404,HEY2,100152404:down|ssc:100156860,BCL2A1,100156860:down|ssc:100521992,HCLS1,100521992:down|ssc:100152038,OSM,100152038:down|ssc:100627352,FAM162A,100627352:up|ssc:100519335,IFT57,…	http://amigo.geneontology.org/cgi-bin/amigo/term_details?term=GO:0010941
negative regulation of phosphorylation	Biological Process	GO:0042326	18	107	0.00234438	0.0401724	ssc:100523837,PRR5L,100523837:down|ssc:100517189,CTDSPL,100517189:up|ssc:100153176,SFRP5,100153176:down|ssc:100516668,RABGEF1,100516668:down|ssc:399503,LIF,399503:down|ssc:100144523,PMEPA1,100144523:down|ssc:100625570,C3orf33,100625570:up|ssc:100525894,DUSP26,100525894:down|ssc:100113425,BMP4,100113425:down|ssc:100516027,SFRP2,100516027:down|ssc:733670,RGS2,733670:up|ssc:100156280,GREM1,100156280…	http://amigo.geneontology.org/cgi-bin/amigo/term_details?term=GO:0042326
integrin binding	Molecular Function	GO:0005178	7	24	0.00234902	0.0401724	ssc:100153791,CYR61,100153791:down|ssc:100154395,NOV,100154395:down|ssc:100519746,DAB2,100519746:down|ssc:100155091,ITGA5,100155091:down|ssc:397620,FN1,397620:down|ssc:100154607,S1PR3,100154607:down|ssc:397063,ITGB3,397063:down	http://amigo.geneontology.org/cgi-bin/amigo/term_details?term=GO:0005178
regulation of bone mineralization	Biological Process	GO:0030500	7	24	0.00234902	0.0401724	ssc:397649,LTF,397649:up|ssc:100127483,BMPR2,100127483:down|ssc:100113425,BMP4,100113425:down|ssc:100516663,CREB3L1,100516663:down|ssc:100156280,GREM1,100156280:down|ssc:100624458,ANKH,100624458:down|ssc:414374,CCR1,414374:down	http://amigo.geneontology.org/cgi-bin/amigo/term_details?term=GO:0030500
artery development	Biological Process	GO:0060840	7	24	0.00234902	0.0401724	ssc:100521305,SMAD7,100521305:down|ssc:100620499,LUZP1,100620499:down|ssc:100155958,SRF,100155958:down|ssc:100127483,BMPR2,100127483:down|ssc:100113425,BMP4,100113425:down|ssc:100169702,PROX1,100169702:down|ssc:100152404,HEY2,100152404:down	http://amigo.geneontology.org/cgi-bin/amigo/term_details?term=GO:0060840
oxidoreduction coenzyme metabolic process	Biological Process	GO:0006733	7	24	0.00234902	0.0401724	ssc:100038014,RPIA,100038014:down|ssc:100514142,GCK,100514142:up|ssc:595123,NAMPT,595123:up|ssc:494561,HK2,494561:down|ssc:397132,FMO1,397132:down|ssc:100522855,HK3,100522855:down|ssc:397038,FBP1,397038:down	http://amigo.geneontology.org/cgi-bin/amigo/term_details?term=GO:0006733
establishment of tissue polarity	Biological Process	GO:0007164	4	8	0.00235445	0.0401724	ssc:100516027,SFRP2,100516027:down|ssc:100519746,DAB2,100519746:down|ssc:100627019,ABL2,100627019:down|ssc:100153176,SFRP5,100153176:down	http://amigo.geneontology.org/cgi-bin/amigo/term_details?term=GO:0007164
establishment of planar polarity	Biological Process	GO:0001736	4	8	0.00235445	0.0401724	ssc:100516027,SFRP2,100516027:down|ssc:100519746,DAB2,100519746:down|ssc:100627019,ABL2,100627019:down|ssc:100153176,SFRP5,100153176:down	http://amigo.geneontology.org/cgi-bin/amigo/term_details?term=GO:0001736
regulation of thymocyte aggregation	Biological Process	GO:2000398	4	8	0.00235445	0.0401724	ssc:397246,VNN1,397246:up|ssc:100516296,EGR3,100516296:down|ssc:100113425,BMP4,100113425:down|ssc:100271930,IL7R,100271930:down	http://amigo.geneontology.org/cgi-bin/amigo/term_details?term=GO:2000398
lysosome localization	Biological Process	GO:0032418	4	8	0.00235445	0.0401724	ssc:100516668,RABGEF1,100516668:down|ssc:100155631,FES,100155631:down|ssc:100511161,PLA2G3,100511161:down|ssc:397406,FCER1G,397406:down	http://amigo.geneontology.org/cgi-bin/amigo/term_details?term=GO:0032418
regulation of T cell differentiation in thymus	Biological Process	GO:0033081	4	8	0.00235445	0.0401724	ssc:397246,VNN1,397246:up|ssc:100516296,EGR3,100516296:down|ssc:100113425,BMP4,100113425:down|ssc:100271930,IL7R,100271930:down	http://amigo.geneontology.org/cgi-bin/amigo/term_details?term=GO:0033081
osteoblast proliferation	Biological Process	GO:0033687	4	8	0.00235445	0.0401724	ssc:100153791,CYR61,100153791:down|ssc:397649,LTF,397649:up|ssc:100156280,GREM1,100156280:down|ssc:397063,ITGB3,397063:down	http://amigo.geneontology.org/cgi-bin/amigo/term_details?term=GO:0033687
phagocytosis, engulfment	Biological Process	GO:0006911	4	8	0.00235445	0.0401724	ssc:100522109,ELMO1,100522109:down|ssc:100519703,F2RL1,100519703:down|ssc:397271,AIF1,397271:down|ssc:397406,FCER1G,397406:down	http://amigo.geneontology.org/cgi-bin/amigo/term_details?term=GO:0006911
positive regulation of secretion by cell	Biological Process	GO:1903532	12	59	0.00246305	0.0419009	ssc:396927,ZP3,396927:up|ssc:100517086,CSF1R,100517086:down|ssc:100049663,EDN3,100049663:up|ssc:100514142,GCK,100514142:up|ssc:397614,IL4R,397614:down|ssc:397094,IL1A,397094:down|ssc:100519703,F2RL1,100519703:down|ssc:397106,IL10,397106:down|ssc:100518141,C2CD2L,100518141:down|ssc:397406,FCER1G,397406:down|ssc:396623,TLR2,396623:down|ssc:100627019,ABL2,100627019:down	http://amigo.geneontology.org/cgi-bin/amigo/term_details?term=GO:1903532
peptidyl-tyrosine phosphorylation	Biological Process	GO:0018108	16	91	0.00253806	0.0430496	ssc:100522873,EPHA2,100522873:down|ssc:100627308,-,100627308:down|ssc:100521992,HCLS1,100521992:down|ssc:100152038,OSM,100152038:down|ssc:399503,LIF,399503:down|ssc:100521487,WEE1,100521487:down|ssc:397201,JAK2,397201:down|ssc:100627019,ABL2,100627019:down|ssc:100516027,SFRP2,100516027:down|ssc:100155091,ITGA5,100155091:down|ssc:100155631,FES,100155631:down|ssc:100156280,GREM1,100156280:down|ssc:…	http://amigo.geneontology.org/cgi-bin/amigo/term_details?term=GO:0018108
non-canonical Wnt signaling pathway	Biological Process	GO:0035567	5	13	0.00263203	0.0443818	ssc:100516027,SFRP2,100516027:down|ssc:100152419,FRZB,100152419:up|ssc:100519746,DAB2,100519746:down|ssc:100627019,ABL2,100627019:down|ssc:100153176,SFRP5,100153176:down	http://amigo.geneontology.org/cgi-bin/amigo/term_details?term=GO:0035567
glutathione metabolic process	Biological Process	GO:0006749	5	13	0.00263203	0.0443818	ssc:100521480,GSTK1,100521480:up|ssc:100153094,-,100153094:up|ssc:100522018,GCLC,100522018:down|ssc:100624445,-,100624445:down|ssc:397682,-,397682:up	http://amigo.geneontology.org/cgi-bin/amigo/term_details?term=GO:0006749
response to other organism	Biological Process	GO:0051707	29	207	0.00264174	0.0444152	ssc:100519446,PLD1,100519446:down|ssc:100521232,DEFB123,100521232:up|ssc:399541,TLR4,399541:down|ssc:396900,AMCF-II,396900:down|ssc:100525528,-,100525528:down|ssc:100154350,NFKBIL1,100154350:up|ssc:100524561,PPBP,100524561:down|ssc:100514958,SLAMF8,100514958:down|ssc:100513746,NOCT,100513746:down|ssc:414371,CCR5,414371:down|ssc:100620216,-,100620216:down|ssc:100127164,PTGER2,100127164:down|ssc:39…	http://amigo.geneontology.org/cgi-bin/amigo/term_details?term=GO:0051707
cytoplasmic side of plasma membrane	Cellular Component	GO:0009898	8	31	0.00273145	0.0454788	ssc:100627308,-,100627308:down|ssc:100155631,FES,100155631:down|ssc:733670,RGS2,733670:up|ssc:100517988,-,100517988:down|ssc:100048958,GNA14,100048958:down|ssc:100511977,-,100511977:up|ssc:404772,GEM,404772:down|ssc:100627019,ABL2,100627019:down	http://amigo.geneontology.org/cgi-bin/amigo/term_details?term=GO:0009898
cytoplasmic side of membrane	Cellular Component	GO:0098562	8	31	0.00273145	0.0454788	ssc:100627308,-,100627308:down|ssc:100155631,FES,100155631:down|ssc:733670,RGS2,733670:up|ssc:100517988,-,100517988:down|ssc:100048958,GNA14,100048958:down|ssc:100511977,-,100511977:up|ssc:404772,GEM,404772:down|ssc:100627019,ABL2,100627019:down	http://amigo.geneontology.org/cgi-bin/amigo/term_details?term=GO:0098562
blood circulation	Biological Process	GO:0008015	17	100	0.00273664	0.0454788	ssc:396724,OLR1,396724:down|ssc:100621502,-,100621502:up|ssc:100127483,BMPR2,100127483:down|ssc:100152404,HEY2,100152404:down|ssc:100623651,DSC2,100623651:down|ssc:397564,HBEGF,397564:down|ssc:397547,NPY1R,397547:up|ssc:396915,EDN1,396915:down|ssc:654298,ID2,654298:down|ssc:733670,RGS2,733670:up|ssc:100049663,EDN3,100049663:up|ssc:100521305,SMAD7,100521305:down|ssc:100525148,PLCB3,100525148:down|…	http://amigo.geneontology.org/cgi-bin/amigo/term_details?term=GO:0008015
circulatory system process	Biological Process	GO:0003013	17	100	0.00273664	0.0454788	ssc:396724,OLR1,396724:down|ssc:100621502,-,100621502:up|ssc:100127483,BMPR2,100127483:down|ssc:100152404,HEY2,100152404:down|ssc:100623651,DSC2,100623651:down|ssc:397564,HBEGF,397564:down|ssc:397547,NPY1R,397547:up|ssc:396915,EDN1,396915:down|ssc:654298,ID2,654298:down|ssc:733670,RGS2,733670:up|ssc:100049663,EDN3,100049663:up|ssc:100521305,SMAD7,100521305:down|ssc:100525148,PLCB3,100525148:down|…	http://amigo.geneontology.org/cgi-bin/amigo/term_details?term=GO:0003013
single-organism process	Biological Process	GO:0044699	360	4058	0.00275937	0.0457244	ssc:100270814,-,100270814:down|ssc:397122,IL1B1,397122:down|ssc:100621027,CX3CL1,100621027:down|ssc:396851,PIK3R5,396851:down|ssc:100624677,HNMT,100624677:down|ssc:100152404,HEY2,100152404:down|ssc:100516143,MBIP,100516143:up|ssc:397186,-,397186:down|ssc:100622220,SLC25A38,100622220:up|ssc:100037292,ACKR4,100037292:down|ssc:100518612,MFSD2A,100518612:down|ssc:100144470,PHEROC,100144470:down|ssc:1…	http://amigo.geneontology.org/cgi-bin/amigo/term_details?term=GO:0044699
response to external biotic stimulus	Biological Process	GO:0043207	29	208	0.00284058	0.0467994	ssc:100519446,PLD1,100519446:down|ssc:100521232,DEFB123,100521232:up|ssc:399541,TLR4,399541:down|ssc:396900,AMCF-II,396900:down|ssc:100525528,-,100525528:down|ssc:100154350,NFKBIL1,100154350:up|ssc:100524561,PPBP,100524561:down|ssc:100514958,SLAMF8,100514958:down|ssc:100513746,NOCT,100513746:down|ssc:414371,CCR5,414371:down|ssc:100620216,-,100620216:down|ssc:100127164,PTGER2,100127164:down|ssc:39…	http://amigo.geneontology.org/cgi-bin/amigo/term_details?term=GO:0043207
enzyme activator activity	Molecular Function	GO:0008047	12	60	0.0028568	0.0467994	ssc:100516027,SFRP2,100516027:down|ssc:100513283,APAF1,100513283:down|ssc:100302703,CCL8,100302703:down|ssc:100156280,GREM1,100156280:down|ssc:100522387,CTSC,100522387:up|ssc:100520599,FAM58A,100520599:up|ssc:100737724,-,100737724:down|ssc:100152055,NCF4,100152055:down|ssc:397407,CLPS,397407:up|ssc:396969,CTSH,396969:down|ssc:397620,FN1,397620:down|ssc:100515283,GM2A,100515283:down	http://amigo.geneontology.org/cgi-bin/amigo/term_details?term=GO:0008047
carbohydrate binding	Molecular Function	GO:0030246	12	60	0.0028568	0.0467994	ssc:100038025,CLEC7A,100038025:down|ssc:396724,OLR1,396724:down|ssc:396927,ZP3,396927:up|ssc:396972,-,396972:down|ssc:396865,CHI3L1,396865:down|ssc:100522260,PPP1R3G,100522260:up|ssc:100127147,SELL,100127147:down|ssc:397209,GFPT1,397209:down|ssc:397316,-,397316:down|ssc:100514142,GCK,100514142:up|ssc:100520839,CLEC2B,100520839:up|ssc:397038,FBP1,397038:down	http://amigo.geneontology.org/cgi-bin/amigo/term_details?term=GO:0030246
apical part of cell	Cellular Component	GO:0045177	12	60	0.0028568	0.0467994	ssc:100621502,-,100621502:up|ssc:100151957,PARD6B,100151957:down|ssc:397263,CLCN5,397263:down|ssc:100519746,DAB2,100519746:down|ssc:397492,DPP4,397492:down|ssc:100515612,C5AR2,100515612:down|ssc:397087,SPP1,397087:down|ssc:100511141,VASH1,100511141:down|ssc:100516960,SLC12A2,100516960:down|ssc:403163,EPCAM,403163:down|ssc:397620,FN1,397620:down|ssc:397063,ITGB3,397063:down	http://amigo.geneontology.org/cgi-bin/amigo/term_details?term=GO:0045177
regulation of peptidase activity	Biological Process	GO:0052547	18	109	0.00289203	0.0472419	ssc:100512873,-,100512873:down|ssc:100127489,S100A9,100127489:down|ssc:100513283,APAF1,100513283:down|ssc:100153791,CYR61,100153791:down|ssc:100519286,SERPINB2,100519286:down|ssc:100627352,FAM162A,100627352:up|ssc:397620,FN1,397620:down|ssc:100622572,-,100622572:down|ssc:100519335,IFT57,100519335:up|ssc:100516027,SFRP2,100516027:down|ssc:100154994,SERPINB10,100154994:down|ssc:100522360,-,10052236…	http://amigo.geneontology.org/cgi-bin/amigo/term_details?term=GO:0052547
cofactor metabolic process	Biological Process	GO:0051186	14	76	0.00296845	0.0483529	ssc:100038014,RPIA,100038014:down|ssc:100286778,PDK4,100286778:down|ssc:100158115,ACOT4,100158115:up|ssc:396816,AKR1B1,396816:down|ssc:100522855,HK3,100522855:down|ssc:397246,VNN1,397246:up|ssc:100154828,ACSS1,100154828:down|ssc:100514142,GCK,100514142:up|ssc:595123,NAMPT,595123:up|ssc:494561,HK2,494561:down|ssc:100038002,ATPIF1,100038002:up|ssc:397132,FMO1,397132:down|ssc:397038,FBP1,397038:down…	http://amigo.geneontology.org/cgi-bin/amigo/term_details?term=GO:0051186
regulation of endothelial cell proliferation	Biological Process	GO:0001936	7	25	0.00303716	0.0491934	ssc:100127483,BMPR2,100127483:down|ssc:100516296,EGR3,100516296:down|ssc:100113425,BMP4,100113425:down|ssc:100038002,ATPIF1,100038002:up|ssc:100169702,PROX1,100169702:down|ssc:396665,-,396665:down|ssc:100511141,VASH1,100511141:down	http://amigo.geneontology.org/cgi-bin/amigo/term_details?term=GO:0001936
toll-like receptor signaling pathway	Biological Process	GO:0002224	7	25	0.00303716	0.0491934	ssc:399541,TLR4,399541:down|ssc:100627693,RAB7B,100627693:down|ssc:100519703,F2RL1,100519703:down|ssc:396623,TLR2,396623:down|ssc:100521986,MAPKAPK2,100521986:down|ssc:397441,CD86,397441:down|ssc:100154350,NFKBIL1,100154350:up	http://amigo.geneontology.org/cgi-bin/amigo/term_details?term=GO:0002224
positive regulation of T cell differentiation	Biological Process	GO:0045582	6	19	0.00310219	0.0498257	ssc:397246,VNN1,397246:up|ssc:397614,IL4R,397614:down|ssc:445528,HLA-DMA,445528:down|ssc:100525094,SASH3,100525094:down|ssc:100516296,EGR3,100516296:down|ssc:100271930,IL7R,100271930:down	http://amigo.geneontology.org/cgi-bin/amigo/term_details?term=GO:0045582
regulation of steroid biosynthetic process	Biological Process	GO:0050810	6	19	0.00310219	0.0498257	ssc:494015,SCAP,494015:up|ssc:396628,VDR,396628:down|ssc:100169702,PROX1,100169702:down|ssc:397497,FGF1,397497:down|ssc:100152963,PEX2,100152963:up|ssc:100153960,NR1H4,100153960:up	http://amigo.geneontology.org/cgi-bin/amigo/term_details?term=GO:0050810
actin cytoskeleton reorganization	Biological Process	GO:0031532	6	19	0.00310219	0.0498257	ssc:100155367,RAP2A,100155367:down|ssc:100155631,FES,100155631:down|ssc:100127489,S100A9,100127489:down|ssc:100515973,GMFG,100515973:down|ssc:396667,PTPN1,396667:down|ssc:100517086,CSF1R,100517086:down	http://amigo.geneontology.org/cgi-bin/amigo/term_details?term=GO:0031532
positive regulation of molecular function	Biological Process	GO:0044093	39	306	0.00312131	0.0499931	ssc:396927,ZP3,396927:up|ssc:396851,PIK3R5,396851:down|ssc:396628,VDR,396628:down|ssc:100127489,S100A9,100127489:down|ssc:100145894,JTB,100145894:up|ssc:100154195,-,100154195:down|ssc:100627352,FAM162A,100627352:up|ssc:100155895,ARRDC4,100155895:down|ssc:397201,JAK2,397201:down|ssc:397620,FN1,397620:down|ssc:100519335,IFT57,100519335:up|ssc:100627019,ABL2,100627019:down|ssc:100517086,CSF1R,100517…	http://amigo.geneontology.org/cgi-bin/amigo/term_details?term=GO:0044093
peptidyl-tyrosine modification	Biological Process	GO:0018212	16	93	0.00318746	0.0509107	ssc:100522873,EPHA2,100522873:down|ssc:100627308,-,100627308:down|ssc:100521992,HCLS1,100521992:down|ssc:100152038,OSM,100152038:down|ssc:399503,LIF,399503:down|ssc:100521487,WEE1,100521487:down|ssc:397201,JAK2,397201:down|ssc:100627019,ABL2,100627019:down|ssc:100516027,SFRP2,100516027:down|ssc:100155091,ITGA5,100155091:down|ssc:100155631,FES,100155631:down|ssc:100156280,GREM1,100156280:down|ssc:…	http://amigo.geneontology.org/cgi-bin/amigo/term_details?term=GO:0018212
plasma membrane protein complex	Cellular Component	GO:0098797	18	110	0.00320354	0.0509242	ssc:100621502,-,100621502:up|ssc:100048958,GNA14,100048958:down|ssc:100156959,OLFM3,100156959:up|ssc:100152055,NCF4,100152055:down|ssc:445528,HLA-DMA,445528:down|ssc:100135050,SLA-DMB,100135050:down|ssc:100037921,SLA-DQB1,100037921:down|ssc:397063,ITGB3,397063:down|ssc:100155091,ITGA5,100155091:down|ssc:100519746,DAB2,100519746:down|ssc:397166,MS4A2,397166:down|ssc:100521305,SMAD7,100521305:down|…	http://amigo.geneontology.org/cgi-bin/amigo/term_details?term=GO:0098797
protein binding	Molecular Function	GO:0005515	153	1551	0.00320601	0.0509242	ssc:100270814,-,100270814:down|ssc:397122,IL1B1,397122:down|ssc:100621027,CX3CL1,100621027:down|ssc:396851,PIK3R5,396851:down|ssc:100152404,HEY2,100152404:down|ssc:100153460,AKAP5,100153460:down|ssc:396665,-,396665:down|ssc:100516143,MBIP,100516143:up|ssc:100145894,JTB,100145894:up|ssc:100037292,ACKR4,100037292:down|ssc:100144523,PMEPA1,100144523:down|ssc:397620,FN1,397620:down|ssc:100155795,MYLI…	http://amigo.geneontology.org/cgi-bin/amigo/term_details?term=GO:0005515
organ morphogenesis	Biological Process	GO:0009887	37	287	0.00325155	0.0515053	ssc:100522873,EPHA2,100522873:down|ssc:396951,PTHLH,396951:up|ssc:396628,VDR,396628:down|ssc:100152404,HEY2,100152404:down|ssc:396665,-,396665:down|ssc:100153176,SFRP5,100153176:down|ssc:100515035,GMNN,100515035:up|ssc:397547,NPY1R,397547:up|ssc:100519335,IFT57,100519335:up|ssc:100627019,ABL2,100627019:down|ssc:100152419,FRZB,100152419:up|ssc:654298,ID2,654298:down|ssc:100156280,GREM1,100156280:d…	http://amigo.geneontology.org/cgi-bin/amigo/term_details?term=GO:0009887
T cell differentiation	Biological Process	GO:0030217	12	61	0.00330014	0.0521314	ssc:100519177,GIMAP1,100519177:down|ssc:397246,VNN1,397246:up|ssc:445528,HLA-DMA,445528:down|ssc:100155958,SRF,100155958:down|ssc:397614,IL4R,397614:down|ssc:100153546,NHEJ1,100153546:up|ssc:574055,TNFSF8,574055:down|ssc:100525094,SASH3,100525094:down|ssc:100113425,BMP4,100113425:down|ssc:100516296,EGR3,100516296:down|ssc:100271930,IL7R,100271930:down|ssc:100627019,ABL2,100627019:down	http://amigo.geneontology.org/cgi-bin/amigo/term_details?term=GO:0030217
single-organism cellular process	Biological Process	GO:0044763	319	3548	0.00332567	0.0523907	ssc:100270814,-,100270814:down|ssc:397122,IL1B1,397122:down|ssc:100621027,CX3CL1,100621027:down|ssc:396851,PIK3R5,396851:down|ssc:100152404,HEY2,100152404:down|ssc:100516143,MBIP,100516143:up|ssc:397186,-,397186:down|ssc:100622220,SLC25A38,100622220:up|ssc:100037292,ACKR4,100037292:down|ssc:100518612,MFSD2A,100518612:down|ssc:100519335,IFT57,100519335:up|ssc:100512012,WFIKKN2,100512012:up|ssc:403…	http://amigo.geneontology.org/cgi-bin/amigo/term_details?term=GO:0044763
leukocyte proliferation	Biological Process	GO:0070661	13	69	0.00337245	0.0529095	ssc:396927,ZP3,396927:up|ssc:100516458,TNFSF18,100516458:down|ssc:100156280,GREM1,100156280:down|ssc:100134969,NFATC2,100134969:down|ssc:100519703,F2RL1,100519703:down|ssc:100522131,FKBP1B,100522131:down|ssc:397106,IL10,397106:down|ssc:100525094,SASH3,100525094:down|ssc:397271,AIF1,397271:down|ssc:100113425,BMP4,100113425:down|ssc:100038026,TNFSF13B,100038026:down|ssc:100271930,IL7R,100271930:dow…	http://amigo.geneontology.org/cgi-bin/amigo/term_details?term=GO:0070661
tissue morphogenesis	Biological Process	GO:0048729	28	201	0.00337701	0.0529095	ssc:100127155,LMO4,100127155:up|ssc:100522873,EPHA2,100522873:down|ssc:396951,PTHLH,396951:up|ssc:396628,VDR,396628:down|ssc:100127483,BMPR2,100127483:down|ssc:100152404,HEY2,100152404:down|ssc:100153176,SFRP5,100153176:down|ssc:397564,HBEGF,397564:down|ssc:100516960,SLC12A2,100516960:down|ssc:100153791,CYR61,100153791:down|ssc:399503,LIF,399503:down|ssc:100155958,SRF,100155958:down|ssc:100113425…	http://amigo.geneontology.org/cgi-bin/amigo/term_details?term=GO:0048729
regulation of lymphocyte differentiation	Biological Process	GO:0045619	8	32	0.00338731	0.0529266	ssc:654298,ID2,654298:down|ssc:397246,VNN1,397246:up|ssc:445528,HLA-DMA,445528:down|ssc:397614,IL4R,397614:down|ssc:100525094,SASH3,100525094:down|ssc:100113425,BMP4,100113425:down|ssc:100516296,EGR3,100516296:down|ssc:100271930,IL7R,100271930:down	http://amigo.geneontology.org/cgi-bin/amigo/term_details?term=GO:0045619
positive regulation of ERK1 and ERK2 cascade	Biological Process	GO:0070374	9	39	0.00345148	0.0537833	ssc:100270814,-,100270814:down|ssc:396865,CHI3L1,396865:down|ssc:100517086,CSF1R,100517086:down|ssc:100515612,C5AR2,100515612:down|ssc:414374,CCR1,414374:down|ssc:397094,IL1A,397094:down|ssc:100519703,F2RL1,100519703:down|ssc:100113425,BMP4,100113425:down|ssc:100627019,ABL2,100627019:down	http://amigo.geneontology.org/cgi-bin/amigo/term_details?term=GO:0070374
receptor complex	Cellular Component	GO:0043235	11	54	0.00364036	0.0565731	ssc:399541,TLR4,399541:down|ssc:100519746,DAB2,100519746:down|ssc:100155091,ITGA5,100155091:down|ssc:100517086,CSF1R,100517086:down|ssc:100156959,OLFM3,100156959:up|ssc:396943,ITGB2,396943:down|ssc:397614,IL4R,397614:down|ssc:733630,VLDLR,733630:up|ssc:100524761,KCTD12,100524761:down|ssc:396623,TLR2,396623:down|ssc:397063,ITGB3,397063:down	http://amigo.geneontology.org/cgi-bin/amigo/term_details?term=GO:0043235
positive regulation of defense response	Biological Process	GO:0031349	12	62	0.00379748	0.0588559	ssc:399541,TLR4,399541:down|ssc:100627693,RAB7B,100627693:down|ssc:100038025,CLEC7A,100038025:down|ssc:396927,ZP3,396927:up|ssc:100621027,CX3CL1,100621027:down|ssc:100127489,S100A9,100127489:down|ssc:100154350,NFKBIL1,100154350:up|ssc:100519703,F2RL1,100519703:down|ssc:397406,FCER1G,397406:down|ssc:396623,TLR2,396623:down|ssc:100521986,MAPKAPK2,100521986:down|ssc:397441,CD86,397441:down	http://amigo.geneontology.org/cgi-bin/amigo/term_details?term=GO:0031349
regulation of cartilage development	Biological Process	GO:0061035	5	14	0.00382277	0.0590161	ssc:100153791,CYR61,100153791:down|ssc:100152419,FRZB,100152419:up|ssc:396951,PTHLH,396951:up|ssc:100127483,BMPR2,100127483:down|ssc:100113425,BMP4,100113425:down	http://amigo.geneontology.org/cgi-bin/amigo/term_details?term=GO:0061035
endothelial cell differentiation	Biological Process	GO:0045446	7	26	0.0038694	0.0590161	ssc:100519703,F2RL1,100519703:down|ssc:100522839,ID1,100522839:up|ssc:100127483,BMPR2,100127483:down|ssc:100113425,BMP4,100113425:down|ssc:100169702,PROX1,100169702:down|ssc:100152404,HEY2,100152404:down|ssc:100154607,S1PR3,100154607:down	http://amigo.geneontology.org/cgi-bin/amigo/term_details?term=GO:0045446
interferon-gamma production	Biological Process	GO:0032609	7	26	0.0038694	0.0590161	ssc:100519703,F2RL1,100519703:down|ssc:396927,ZP3,396927:up|ssc:397106,IL10,397106:down|ssc:100525094,SASH3,100525094:down|ssc:100620216,-,100620216:down|ssc:100621544,RNF19B,100621544:down|ssc:100627019,ABL2,100627019:down	http://amigo.geneontology.org/cgi-bin/amigo/term_details?term=GO:0032609
positive regulation of protein localization to nucleus	Biological Process	GO:1900182	7	26	0.0038694	0.0590161	ssc:100516027,SFRP2,100516027:down|ssc:100521992,HCLS1,100521992:down|ssc:399503,LIF,399503:down|ssc:100519746,DAB2,100519746:down|ssc:100113425,BMP4,100113425:down|ssc:396623,TLR2,396623:down|ssc:100156280,GREM1,100156280:down	http://amigo.geneontology.org/cgi-bin/amigo/term_details?term=GO:1900182
regulation of biomineral tissue development	Biological Process	GO:0070167	7	26	0.0038694	0.0590161	ssc:397649,LTF,397649:up|ssc:100127483,BMPR2,100127483:down|ssc:100113425,BMP4,100113425:down|ssc:100516663,CREB3L1,100516663:down|ssc:100156280,GREM1,100156280:down|ssc:100624458,ANKH,100624458:down|ssc:414374,CCR1,414374:down	http://amigo.geneontology.org/cgi-bin/amigo/term_details?term=GO:0070167
regulation of T cell differentiation	Biological Process	GO:0045580	7	26	0.0038694	0.0590161	ssc:397246,VNN1,397246:up|ssc:397614,IL4R,397614:down|ssc:445528,HLA-DMA,445528:down|ssc:100525094,SASH3,100525094:down|ssc:100516296,EGR3,100516296:down|ssc:100113425,BMP4,100113425:down|ssc:100271930,IL7R,100271930:down	http://amigo.geneontology.org/cgi-bin/amigo/term_details?term=GO:0045580
regulation of myeloid cell differentiation	Biological Process	GO:0045637	10	47	0.00393812	0.0597029	ssc:397649,LTF,397649:up|ssc:100627693,RAB7B,100627693:down|ssc:397093,INHBA,397093:down|ssc:100155631,FES,100155631:down|ssc:654298,ID2,654298:down|ssc:414374,CCR1,414374:down|ssc:100152462,ACVR1B,100152462:down|ssc:399503,LIF,399503:down|ssc:100521992,HCLS1,100521992:down|ssc:397405,TYROBP,397405:down	http://amigo.geneontology.org/cgi-bin/amigo/term_details?term=GO:0045637
positive regulation of smooth muscle cell proliferation	Biological Process	GO:0048661	4	9	0.00396635	0.0597029	ssc:397564,HBEGF,397564:down|ssc:654298,ID2,654298:down|ssc:100113425,BMP4,100113425:down|ssc:397271,AIF1,397271:down	http://amigo.geneontology.org/cgi-bin/amigo/term_details?term=GO:0048661
chemokine binding	Molecular Function	GO:0019956	4	9	0.00396635	0.0597029	ssc:100737352,ACKR2,100737352:down|ssc:414371,CCR5,414371:down|ssc:100037292,ACKR4,100037292:down|ssc:414374,CCR1,414374:down	http://amigo.geneontology.org/cgi-bin/amigo/term_details?term=GO:0019956
melanocyte differentiation	Biological Process	GO:0030318	4	9	0.00396635	0.0597029	ssc:654297,CITED1,654297:up|ssc:100520218,ADAMTS9,100520218:down|ssc:414911,EDNRB,414911:down|ssc:100049663,EDN3,100049663:up	http://amigo.geneontology.org/cgi-bin/amigo/term_details?term=GO:0030318
morphogenesis of a polarized epithelium	Biological Process	GO:0001738	4	9	0.00396635	0.0597029	ssc:100516027,SFRP2,100516027:down|ssc:100519746,DAB2,100519746:down|ssc:100627019,ABL2,100627019:down|ssc:100153176,SFRP5,100153176:down	http://amigo.geneontology.org/cgi-bin/amigo/term_details?term=GO:0001738
transmembrane receptor protein tyrosine kinase signaling pathway	Biological Process	GO:0007169	20	130	0.00406764	0.0610678	ssc:100286778,PDK4,100286778:down|ssc:100522873,EPHA2,100522873:down|ssc:100627308,-,100627308:down|ssc:100127483,BMPR2,100127483:down|ssc:397495,BDNF,397495:down|ssc:397564,HBEGF,397564:down|ssc:100516668,RABGEF1,100516668:down|ssc:100622249,ARID5B,100622249:down|ssc:397201,JAK2,397201:down|ssc:397497,FGF1,397497:down|ssc:100627019,ABL2,100627019:down|ssc:100155631,FES,100155631:down|ssc:1005179…	http://amigo.geneontology.org/cgi-bin/amigo/term_details?term=GO:0007169
positive regulation of protein secretion	Biological Process	GO:0050714	9	40	0.00413939	0.0617939	ssc:100517086,CSF1R,100517086:down|ssc:397614,IL4R,397614:down|ssc:397094,IL1A,397094:down|ssc:100519703,F2RL1,100519703:down|ssc:100514142,GCK,100514142:up|ssc:397106,IL10,397106:down|ssc:100518141,C2CD2L,100518141:down|ssc:396623,TLR2,396623:down|ssc:100627019,ABL2,100627019:down	http://amigo.geneontology.org/cgi-bin/amigo/term_details?term=GO:0050714
pattern recognition receptor signaling pathway	Biological Process	GO:0002221	8	33	0.004159	0.0617939	ssc:399541,TLR4,399541:down|ssc:100627693,RAB7B,100627693:down|ssc:100038025,CLEC7A,100038025:down|ssc:100154350,NFKBIL1,100154350:up|ssc:100519703,F2RL1,100519703:down|ssc:396623,TLR2,396623:down|ssc:397441,CD86,397441:down|ssc:100521986,MAPKAPK2,100521986:down	http://amigo.geneontology.org/cgi-bin/amigo/term_details?term=GO:0002221
bone mineralization	Biological Process	GO:0030282	8	33	0.004159	0.0617939	ssc:397649,LTF,397649:up|ssc:100620511,CLEC3B,100620511:up|ssc:100127483,BMPR2,100127483:down|ssc:100516663,CREB3L1,100516663:down|ssc:100156280,GREM1,100156280:down|ssc:100624458,ANKH,100624458:down|ssc:414374,CCR1,414374:down|ssc:100113425,BMP4,100113425:down	http://amigo.geneontology.org/cgi-bin/amigo/term_details?term=GO:0030282
innate immune response-activating signal transduction	Biological Process	GO:0002758	8	33	0.004159	0.0617939	ssc:399541,TLR4,399541:down|ssc:100627693,RAB7B,100627693:down|ssc:100038025,CLEC7A,100038025:down|ssc:100154350,NFKBIL1,100154350:up|ssc:100519703,F2RL1,100519703:down|ssc:396623,TLR2,396623:down|ssc:397441,CD86,397441:down|ssc:100521986,MAPKAPK2,100521986:down	http://amigo.geneontology.org/cgi-bin/amigo/term_details?term=GO:0002758
negative regulation of cellular metabolic process	Biological Process	GO:0031324	63	559	0.00428334	0.063161	ssc:100270814,-,100270814:down|ssc:396927,ZP3,396927:up|ssc:396951,PTHLH,396951:up|ssc:100523837,PRR5L,100523837:down|ssc:396628,VDR,396628:down|ssc:100152404,HEY2,100152404:down|ssc:100625349,MXD1,100625349:down|ssc:100153176,SFRP5,100153176:down|ssc:100515035,GMNN,100515035:up|ssc:780421,CMKLR1,780421:down|ssc:100521992,HCLS1,100521992:down|ssc:100144523,PMEPA1,100144523:down|ssc:100622572,-,10…	http://amigo.geneontology.org/cgi-bin/amigo/term_details?term=GO:0031324
positive regulation of cell communication	Biological Process	GO:0010647	45	372	0.00428396	0.063161	ssc:100270814,-,100270814:down|ssc:397122,IL1B1,397122:down|ssc:396927,ZP3,396927:up|ssc:396851,PIK3R5,396851:down|ssc:100523837,PRR5L,100523837:down|ssc:100127489,S100A9,100127489:down|ssc:100153460,AKAP5,100153460:down|ssc:100521992,HCLS1,100521992:down|ssc:100152038,OSM,100152038:down|ssc:100627352,FAM162A,100627352:up|ssc:397201,JAK2,397201:down|ssc:100156358,S100A4,100156358:down|ssc:1006270…	http://amigo.geneontology.org/cgi-bin/amigo/term_details?term=GO:0010647
positive regulation of signaling	Biological Process	GO:0023056	45	372	0.00428396	0.063161	ssc:100270814,-,100270814:down|ssc:397122,IL1B1,397122:down|ssc:396927,ZP3,396927:up|ssc:396851,PIK3R5,396851:down|ssc:100523837,PRR5L,100523837:down|ssc:100127489,S100A9,100127489:down|ssc:100153460,AKAP5,100153460:down|ssc:100521992,HCLS1,100521992:down|ssc:100152038,OSM,100152038:down|ssc:100627352,FAM162A,100627352:up|ssc:397201,JAK2,397201:down|ssc:100156358,S100A4,100156358:down|ssc:1006270…	http://amigo.geneontology.org/cgi-bin/amigo/term_details?term=GO:0023056
growth	Biological Process	GO:0040007	32	243	0.00436182	0.0641444	ssc:396927,ZP3,396927:up|ssc:396951,PTHLH,396951:up|ssc:100525983,DCUN1D3,100525983:down|ssc:100152404,HEY2,100152404:down|ssc:396665,-,396665:down|ssc:100153176,SFRP5,100153176:down|ssc:397547,NPY1R,397547:up|ssc:397620,FN1,397620:down|ssc:100518125,YBX3,100518125:up|ssc:100152419,FRZB,100152419:up|ssc:100101470,ATRN,100101470:down|ssc:396766,CELA1,396766:up|ssc:100525560,CDKN2D,100525560:up|ssc…	http://amigo.geneontology.org/cgi-bin/amigo/term_details?term=GO:0040007
morphogenesis of an epithelium	Biological Process	GO:0002009	23	158	0.00438482	0.0643181	ssc:100127155,LMO4,100127155:up|ssc:100522873,EPHA2,100522873:down|ssc:396951,PTHLH,396951:up|ssc:396628,VDR,396628:down|ssc:100153176,SFRP5,100153176:down|ssc:397564,HBEGF,397564:down|ssc:100516960,SLC12A2,100516960:down|ssc:100153791,CYR61,100153791:down|ssc:399503,LIF,399503:down|ssc:100155958,SRF,100155958:down|ssc:100113425,BMP4,100113425:down|ssc:100169702,PROX1,100169702:down|ssc:397497,FG…	http://amigo.geneontology.org/cgi-bin/amigo/term_details?term=GO:0002009
epithelial cell proliferation	Biological Process	GO:0050673	16	96	0.00441398	0.0645811	ssc:100522873,EPHA2,100522873:down|ssc:396628,VDR,396628:down|ssc:100127483,BMPR2,100127483:down|ssc:396665,-,396665:down|ssc:100515612,C5AR2,100515612:down|ssc:100511141,VASH1,100511141:down|ssc:100516296,EGR3,100516296:down|ssc:100113425,BMP4,100113425:down|ssc:100169702,PROX1,100169702:down|ssc:397497,FGF1,397497:down|ssc:100519335,IFT57,100519335:up|ssc:100516027,SFRP2,100516027:down|ssc:6542…	http://amigo.geneontology.org/cgi-bin/amigo/term_details?term=GO:0050673
lipid biosynthetic process	Biological Process	GO:0008610	20	131	0.00444644	0.0647267	ssc:100286778,PDK4,100286778:down|ssc:396927,ZP3,396927:up|ssc:494015,SCAP,494015:up|ssc:396628,VDR,396628:down|ssc:100153791,CYR61,100153791:down|ssc:100170845,-,100170845:down|ssc:100169702,PROX1,100169702:down|ssc:397497,FGF1,397497:down|ssc:100144446,HMGCR,100144446:up|ssc:403330,CYP17A1,403330:down|ssc:100153960,NR1H4,100153960:up|ssc:100518796,SGMS2,100518796:down|ssc:100157868,CH25H,100157…	http://amigo.geneontology.org/cgi-bin/amigo/term_details?term=GO:0008610
regulation of protein transport	Biological Process	GO:0051223	20	131	0.00444644	0.0647267	ssc:399541,TLR4,399541:down|ssc:100515612,C5AR2,100515612:down|ssc:100153176,SFRP5,100153176:down|ssc:100516668,RABGEF1,100516668:down|ssc:100514142,GCK,100514142:up|ssc:100521992,HCLS1,100521992:down|ssc:100113425,BMP4,100113425:down|ssc:100627019,ABL2,100627019:down|ssc:100516027,SFRP2,100516027:down|ssc:100738470,NDUFAF2,100738470:up|ssc:100519746,DAB2,100519746:down|ssc:100156280,GREM1,100156…	http://amigo.geneontology.org/cgi-bin/amigo/term_details?term=GO:0051223
regulation of leukocyte proliferation	Biological Process	GO:0070663	10	48	0.00462096	0.0654991	ssc:396927,ZP3,396927:up|ssc:100516458,TNFSF18,100516458:down|ssc:100156280,GREM1,100156280:down|ssc:100134969,NFATC2,100134969:down|ssc:397106,IL10,397106:down|ssc:100525094,SASH3,100525094:down|ssc:397271,AIF1,397271:down|ssc:100113425,BMP4,100113425:down|ssc:100038026,TNFSF13B,100038026:down|ssc:397441,CD86,397441:down	http://amigo.geneontology.org/cgi-bin/amigo/term_details?term=GO:0070663
regulation of mast cell activation	Biological Process	GO:0033003	3	5	0.00477289	0.0654991	ssc:100516668,RABGEF1,100516668:down|ssc:100155631,FES,100155631:down|ssc:397406,FCER1G,397406:down	http://amigo.geneontology.org/cgi-bin/amigo/term_details?term=GO:0033003
regulation of actin cytoskeleton reorganization	Biological Process	GO:2000249	3	5	0.00477289	0.0654991	ssc:100155631,FES,100155631:down|ssc:100515973,GMFG,100515973:down|ssc:100517086,CSF1R,100517086:down	http://amigo.geneontology.org/cgi-bin/amigo/term_details?term=GO:2000249
RAGE receptor binding	Molecular Function	GO:0050786	3	5	0.00477289	0.0654991	ssc:100127489,S100A9,100127489:down|ssc:100623510,S100B,100623510:up|ssc:100156358,S100A4,100156358:down	http://amigo.geneontology.org/cgi-bin/amigo/term_details?term=GO:0050786
signaling pattern recognition receptor activity	Molecular Function	GO:0008329	3	5	0.00477289	0.0654991	ssc:399541,TLR4,399541:down|ssc:100038025,CLEC7A,100038025:down|ssc:396623,TLR2,396623:down	http://amigo.geneontology.org/cgi-bin/amigo/term_details?term=GO:0008329
interleukin-6 secretion	Biological Process	GO:0072604	3	5	0.00477289	0.0654991	ssc:100516668,RABGEF1,100516668:down|ssc:100519703,F2RL1,100519703:down|ssc:100515612,C5AR2,100515612:down	http://amigo.geneontology.org/cgi-bin/amigo/term_details?term=GO:0072604
negative regulation of interleukin-12 production	Biological Process	GO:0032695	3	5	0.00477289	0.0654991	ssc:780421,CMKLR1,780421:down|ssc:397106,IL10,397106:down|ssc:396623,TLR2,396623:down	http://amigo.geneontology.org/cgi-bin/amigo/term_details?term=GO:0032695
positive regulation of neutrophil migration	Biological Process	GO:1902624	3	5	0.00477289	0.0654991	ssc:100621675,-,100621675:down|ssc:100620730,-,100620730:down|ssc:396880,-,396880:down	http://amigo.geneontology.org/cgi-bin/amigo/term_details?term=GO:1902624
polysomal ribosome	Cellular Component	GO:0042788	3	5	0.00477289	0.0654991	ssc:100519109,NUFIP2,100519109:down|ssc:100522458,LARP4B,100522458:down|ssc:397680,NR0B1,397680:up	http://amigo.geneontology.org/cgi-bin/amigo/term_details?term=GO:0042788
negative regulation of pathway-restricted SMAD protein phosphorylation	Biological Process	GO:0060394	3	5	0.00477289	0.0654991	ssc:100521305,SMAD7,100521305:down|ssc:100144523,PMEPA1,100144523:down|ssc:100156280,GREM1,100156280:down	http://amigo.geneontology.org/cgi-bin/amigo/term_details?term=GO:0060394
antigen processing and presentation of peptide antigen via MHC class II	Biological Process	GO:0002495	3	5	0.00477289	0.0654991	ssc:445528,HLA-DMA,445528:down|ssc:100174943,IFI30,100174943:down|ssc:397406,FCER1G,397406:down	http://amigo.geneontology.org/cgi-bin/amigo/term_details?term=GO:0002495
positive regulation of osteoblast proliferation	Biological Process	GO:0033690	3	5	0.00477289	0.0654991	ssc:100153791,CYR61,100153791:down|ssc:397649,LTF,397649:up|ssc:397063,ITGB3,397063:down	http://amigo.geneontology.org/cgi-bin/amigo/term_details?term=GO:0033690
regulation of transcription from RNA polymerase II promoter involved in heart development	Biological Process	GO:1901213	3	5	0.00477289	0.0654991	ssc:100155958,SRF,100155958:down|ssc:100113425,BMP4,100113425:down|ssc:100156280,GREM1,100156280:down	http://amigo.geneontology.org/cgi-bin/amigo/term_details?term=GO:1901213
pattern recognition receptor activity	Molecular Function	GO:0038187	3	5	0.00477289	0.0654991	ssc:399541,TLR4,399541:down|ssc:100038025,CLEC7A,100038025:down|ssc:396623,TLR2,396623:down	http://amigo.geneontology.org/cgi-bin/amigo/term_details?term=GO:0038187
C-C chemokine binding	Molecular Function	GO:0019957	3	5	0.00477289	0.0654991	ssc:100737352,ACKR2,100737352:down|ssc:414371,CCR5,414371:down|ssc:414374,CCR1,414374:down	http://amigo.geneontology.org/cgi-bin/amigo/term_details?term=GO:0019957
response to fatty acid	Biological Process	GO:0070542	3	5	0.00477289	0.0654991	ssc:100127164,PTGER2,100127164:down|ssc:100286778,PDK4,100286778:down|ssc:100524418,PTGDR,100524418:down	http://amigo.geneontology.org/cgi-bin/amigo/term_details?term=GO:0070542
positive regulation of tyrosine phosphorylation of Stat3 protein	Biological Process	GO:0042517	3	5	0.00477289	0.0654991	ssc:399503,LIF,399503:down|ssc:397201,JAK2,397201:down|ssc:100517086,CSF1R,100517086:down	http://amigo.geneontology.org/cgi-bin/amigo/term_details?term=GO:0042517
cellular response to fatty acid	Biological Process	GO:0071398	3	5	0.00477289	0.0654991	ssc:100127164,PTGER2,100127164:down|ssc:100286778,PDK4,100286778:down|ssc:100524418,PTGDR,100524418:down	http://amigo.geneontology.org/cgi-bin/amigo/term_details?term=GO:0071398
phosphotransferase activity, nitrogenous group as acceptor	Molecular Function	GO:0016775	3	5	0.00477289	0.0654991	ssc:100523692,KCNH4,100523692:down|ssc:100126293,CASS4,100126293:down|ssc:397264,CKM,397264:down	http://amigo.geneontology.org/cgi-bin/amigo/term_details?term=GO:0016775
peptidase activator activity involved in apoptotic process	Molecular Function	GO:0016505	3	5	0.00477289	0.0654991	ssc:396969,CTSH,396969:down|ssc:100513283,APAF1,100513283:down|ssc:100522387,CTSC,100522387:up	http://amigo.geneontology.org/cgi-bin/amigo/term_details?term=GO:0016505
positive regulation of neutrophil chemotaxis	Biological Process	GO:0090023	3	5	0.00477289	0.0654991	ssc:100621675,-,100621675:down|ssc:100620730,-,100620730:down|ssc:396880,-,396880:down	http://amigo.geneontology.org/cgi-bin/amigo/term_details?term=GO:0090023
NADP metabolic process	Biological Process	GO:0006739	3	5	0.00477289	0.0654991	ssc:100038014,RPIA,100038014:down|ssc:100514142,GCK,100514142:up|ssc:397132,FMO1,397132:down	http://amigo.geneontology.org/cgi-bin/amigo/term_details?term=GO:0006739
interferon-gamma secretion	Biological Process	GO:0072643	3	5	0.00477289	0.0654991	ssc:100519703,F2RL1,100519703:down|ssc:100621544,RNF19B,100621544:down|ssc:100627019,ABL2,100627019:down	http://amigo.geneontology.org/cgi-bin/amigo/term_details?term=GO:0072643
positive regulation of cartilage development	Biological Process	GO:0061036	3	5	0.00477289	0.0654991	ssc:100153791,CYR61,100153791:down|ssc:100127483,BMPR2,100127483:down|ssc:100113425,BMP4,100113425:down	http://amigo.geneontology.org/cgi-bin/amigo/term_details?term=GO:0061036
endothelial cell proliferation	Biological Process	GO:0001935	7	27	0.00486385	0.0665884	ssc:100127483,BMPR2,100127483:down|ssc:100516296,EGR3,100516296:down|ssc:100113425,BMP4,100113425:down|ssc:100038002,ATPIF1,100038002:up|ssc:100169702,PROX1,100169702:down|ssc:396665,-,396665:down|ssc:100511141,VASH1,100511141:down	http://amigo.geneontology.org/cgi-bin/amigo/term_details?term=GO:0001935
regulation of cell morphogenesis	Biological Process	GO:0022604	16	97	0.00489973	0.0669203	ssc:100127483,BMPR2,100127483:down|ssc:396665,-,396665:down|ssc:399503,LIF,399503:down|ssc:100155958,SRF,100155958:down|ssc:397620,FN1,397620:down|ssc:654413,PALMD,654413:down|ssc:100520585,FMNL1,100520585:down|ssc:100516027,SFRP2,100516027:down|ssc:100155631,FES,100155631:down|ssc:100519746,DAB2,100519746:down|ssc:100156280,GREM1,100156280:down|ssc:100517086,CSF1R,100517086:down|ssc:100625407,NE…	http://amigo.geneontology.org/cgi-bin/amigo/term_details?term=GO:0022604
sulfur compound binding	Molecular Function	GO:1901681	9	41	0.00492987	0.0671725	ssc:100154395,NOV,100154395:down|ssc:100620511,CLEC3B,100620511:up|ssc:100152401,POSTN,100152401:down|ssc:100153791,CYR61,100153791:down|ssc:397564,HBEGF,397564:down|ssc:397609,PTF-BETA,397609:up|ssc:396806,BSP1,396806:up|ssc:100113425,BMP4,100113425:down|ssc:397497,FGF1,397497:down	http://amigo.geneontology.org/cgi-bin/amigo/term_details?term=GO:1901681
protein kinase B signaling	Biological Process	GO:0043491	8	34	0.00505934	0.0687735	ssc:100270814,-,100270814:down|ssc:396927,ZP3,396927:up|ssc:100522873,EPHA2,100522873:down|ssc:396851,PIK3R5,396851:down|ssc:396865,CHI3L1,396865:down|ssc:100153176,SFRP5,100153176:down|ssc:397564,HBEGF,397564:down|ssc:100521992,HCLS1,100521992:down	http://amigo.geneontology.org/cgi-bin/amigo/term_details?term=GO:0043491
negative regulation of macromolecule metabolic process	Biological Process	GO:0010605	61	542	0.00508552	0.068831	ssc:396927,ZP3,396927:up|ssc:396951,PTHLH,396951:up|ssc:100523837,PRR5L,100523837:down|ssc:396628,VDR,396628:down|ssc:100152404,HEY2,100152404:down|ssc:100625349,MXD1,100625349:down|ssc:100153176,SFRP5,100153176:down|ssc:100515035,GMNN,100515035:up|ssc:780421,CMKLR1,780421:down|ssc:100521992,HCLS1,100521992:down|ssc:100144523,PMEPA1,100144523:down|ssc:100622572,-,100622572:down|ssc:100153960,NR1H…	http://amigo.geneontology.org/cgi-bin/amigo/term_details?term=GO:0010605
protein secretion	Biological Process	GO:0009306	17	106	0.00508751	0.068831	ssc:399541,TLR4,399541:down|ssc:100515612,C5AR2,100515612:down|ssc:100516668,RABGEF1,100516668:down|ssc:100514142,GCK,100514142:up|ssc:100038026,TNFSF13B,100038026:down|ssc:100627019,ABL2,100627019:down|ssc:100738470,NDUFAF2,100738470:up|ssc:100517086,CSF1R,100517086:down|ssc:396865,CHI3L1,396865:down|ssc:100522131,FKBP1B,100522131:down|ssc:397094,IL1A,397094:down|ssc:397614,IL4R,397614:down|ssc:…	http://amigo.geneontology.org/cgi-bin/amigo/term_details?term=GO:0009306
vasculature development	Biological Process	GO:0001944	23	160	0.00513267	0.069279	ssc:100522873,EPHA2,100522873:down|ssc:100621027,CX3CL1,100621027:down|ssc:100127483,BMPR2,100127483:down|ssc:100152404,HEY2,100152404:down|ssc:100511141,VASH1,100511141:down|ssc:100153791,CYR61,100153791:down|ssc:399503,LIF,399503:down|ssc:100155958,SRF,100155958:down|ssc:100622445,ELK3,100622445:down|ssc:100516296,EGR3,100516296:down|ssc:100113425,BMP4,100113425:down|ssc:100169702,PROX1,1001697…	http://amigo.geneontology.org/cgi-bin/amigo/term_details?term=GO:0001944
regulation of establishment of protein localization	Biological Process	GO:0070201	21	142	0.00526971	0.0707964	ssc:399541,TLR4,399541:down|ssc:100522873,EPHA2,100522873:down|ssc:100515612,C5AR2,100515612:down|ssc:100153176,SFRP5,100153176:down|ssc:100516668,RABGEF1,100516668:down|ssc:100514142,GCK,100514142:up|ssc:100521992,HCLS1,100521992:down|ssc:100113425,BMP4,100113425:down|ssc:100627019,ABL2,100627019:down|ssc:100516027,SFRP2,100516027:down|ssc:100738470,NDUFAF2,100738470:up|ssc:100519746,DAB2,100519…	http://amigo.geneontology.org/cgi-bin/amigo/term_details?term=GO:0070201
vacuole	Cellular Component	GO:0005773	21	142	0.00526971	0.0707964	ssc:100519446,PLD1,100519446:down|ssc:100627693,RAB7B,100627693:down|ssc:100621457,-,100621457:down|ssc:397492,DPP4,397492:down|ssc:397472,ATP6V1H,397472:down|ssc:100152247,TP53INP2,100152247:down|ssc:445528,HLA-DMA,445528:down|ssc:100519240,MFSD12,100519240:down|ssc:100624193,LAPTM5,100624193:down|ssc:100513526,MARCH3,100513526:down|ssc:100620759,-,100620759:up|ssc:397263,CLCN5,397263:down|ssc:1…	http://amigo.geneontology.org/cgi-bin/amigo/term_details?term=GO:0005773
proteolysis	Biological Process	GO:0006508	48	407	0.00528454	0.0708301	ssc:396951,PTHLH,396951:up|ssc:100127489,S100A9,100127489:down|ssc:396985,PLAU,396985:down|ssc:397492,DPP4,397492:down|ssc:100627352,FAM162A,100627352:up|ssc:100520400,YOD1,100520400:down|ssc:100156168,PRSS35,100156168:down|ssc:397620,FN1,397620:down|ssc:100622572,-,100622572:down|ssc:100519335,IFT57,100519335:up|ssc:100620361,-,100620361:down|ssc:397476,-,397476:up|ssc:100154994,SERPINB10,100154…	http://amigo.geneontology.org/cgi-bin/amigo/term_details?term=GO:0006508
sterol biosynthetic process	Biological Process	GO:0016126	5	15	0.00535476	0.071083	ssc:100312968,EBP,100312968:up|ssc:494015,SCAP,494015:up|ssc:397497,FGF1,397497:down|ssc:100144446,HMGCR,100144446:up|ssc:100152963,PEX2,100152963:up	http://amigo.geneontology.org/cgi-bin/amigo/term_details?term=GO:0016126
regulation of cytokine production involved in immune response	Biological Process	GO:0002718	5	15	0.00535476	0.071083	ssc:100519703,F2RL1,100519703:down|ssc:397106,IL10,397106:down|ssc:100525094,SASH3,100525094:down|ssc:396623,TLR2,396623:down|ssc:397406,FCER1G,397406:down	http://amigo.geneontology.org/cgi-bin/amigo/term_details?term=GO:0002718
peptidyl-tyrosine autophosphorylation	Biological Process	GO:0038083	5	15	0.00535476	0.071083	ssc:100627308,-,100627308:down|ssc:100155631,FES,100155631:down|ssc:100517988,-,100517988:down|ssc:100156280,GREM1,100156280:down|ssc:100627019,ABL2,100627019:down	http://amigo.geneontology.org/cgi-bin/amigo/term_details?term=GO:0038083
cargo receptor activity	Molecular Function	GO:0038024	5	15	0.00535476	0.071083	ssc:100737352,ACKR2,100737352:down|ssc:100519746,DAB2,100519746:down|ssc:100037292,ACKR4,100037292:down|ssc:733630,VLDLR,733630:up|ssc:100511665,MSR1,100511665:down	http://amigo.geneontology.org/cgi-bin/amigo/term_details?term=GO:0038024
positive regulation of signal transduction	Biological Process	GO:0009967	42	346	0.00537566	0.071083	ssc:100270814,-,100270814:down|ssc:397122,IL1B1,397122:down|ssc:396927,ZP3,396927:up|ssc:396851,PIK3R5,396851:down|ssc:100523837,PRR5L,100523837:down|ssc:100127489,S100A9,100127489:down|ssc:100153460,AKAP5,100153460:down|ssc:100521992,HCLS1,100521992:down|ssc:100152038,OSM,100152038:down|ssc:100627352,FAM162A,100627352:up|ssc:397201,JAK2,397201:down|ssc:100156358,S100A4,100156358:down|ssc:1006270…	http://amigo.geneontology.org/cgi-bin/amigo/term_details?term=GO:0009967
T cell mediated immunity	Biological Process	GO:0002456	6	21	0.00539209	0.071083	ssc:396927,ZP3,396927:up|ssc:396969,CTSH,396969:down|ssc:100525094,SASH3,100525094:down|ssc:100271930,IL7R,100271930:down|ssc:100522387,CTSC,100522387:up|ssc:100152253,STX11,100152253:down	http://amigo.geneontology.org/cgi-bin/amigo/term_details?term=GO:0002456
negative regulation of MAP kinase activity	Biological Process	GO:0043407	6	21	0.00539209	0.071083	ssc:100516027,SFRP2,100516027:down|ssc:100523472,DUSP19,100523472:up|ssc:100113425,BMP4,100113425:down|ssc:733670,RGS2,733670:up|ssc:100524790,RGS14,100524790:down|ssc:100153176,SFRP5,100153176:down	http://amigo.geneontology.org/cgi-bin/amigo/term_details?term=GO:0043407
regulation of epithelial cell proliferation	Biological Process	GO:0050678	14	81	0.00540231	0.071083	ssc:100516027,SFRP2,100516027:down|ssc:396628,VDR,396628:down|ssc:100127483,BMPR2,100127483:down|ssc:396665,-,396665:down|ssc:100515612,C5AR2,100515612:down|ssc:100155995,NFIB,100155995:up|ssc:100511141,VASH1,100511141:down|ssc:100113425,BMP4,100113425:down|ssc:100516296,EGR3,100516296:down|ssc:100038002,ATPIF1,100038002:up|ssc:100169702,PROX1,100169702:down|ssc:397497,FGF1,397497:down|ssc:100519…	http://amigo.geneontology.org/cgi-bin/amigo/term_details?term=GO:0050678
cell-cell signaling	Biological Process	GO:0007267	28	208	0.00549054	0.072079	ssc:100621457,-,100621457:down|ssc:100623510,S100B,100623510:up|ssc:397495,BDNF,397495:down|ssc:100153791,CYR61,100153791:down|ssc:100514142,GCK,100514142:up|ssc:100152038,OSM,100152038:down|ssc:399503,LIF,399503:down|ssc:100155958,SRF,100155958:down|ssc:414371,CCR5,414371:down|ssc:100516296,EGR3,100516296:down|ssc:100113425,BMP4,100113425:down|ssc:397497,FGF1,397497:down|ssc:100154395,NOV,100154…	http://amigo.geneontology.org/cgi-bin/amigo/term_details?term=GO:0007267
regulation of organ morphogenesis	Biological Process	GO:2000027	11	57	0.00561648	0.0735644	ssc:100516027,SFRP2,100516027:down|ssc:100519746,DAB2,100519746:down|ssc:396628,VDR,396628:down|ssc:100156280,GREM1,100156280:down|ssc:397495,BDNF,397495:down|ssc:100153176,SFRP5,100153176:down|ssc:100155995,NFIB,100155995:up|ssc:399503,LIF,399503:down|ssc:100113425,BMP4,100113425:down|ssc:397497,FGF1,397497:down|ssc:100627019,ABL2,100627019:down	http://amigo.geneontology.org/cgi-bin/amigo/term_details?term=GO:2000027
coenzyme metabolic process	Biological Process	GO:0006732	12	65	0.00566034	0.0736357	ssc:100038014,RPIA,100038014:down|ssc:100286778,PDK4,100286778:down|ssc:100158115,ACOT4,100158115:up|ssc:100522855,HK3,100522855:down|ssc:397246,VNN1,397246:up|ssc:100154828,ACSS1,100154828:down|ssc:100514142,GCK,100514142:up|ssc:595123,NAMPT,595123:up|ssc:494561,HK2,494561:down|ssc:397132,FMO1,397132:down|ssc:397038,FBP1,397038:down|ssc:100144446,HMGCR,100144446:up	http://amigo.geneontology.org/cgi-bin/amigo/term_details?term=GO:0006732
adaptive immune response	Biological Process	GO:0002250	12	65	0.00566034	0.0736357	ssc:396927,ZP3,396927:up|ssc:100627308,-,100627308:down|ssc:100517988,-,100517988:down|ssc:100522387,CTSC,100522387:up|ssc:100152253,STX11,100152253:down|ssc:445528,HLA-DMA,445528:down|ssc:396969,CTSH,396969:down|ssc:397614,IL4R,397614:down|ssc:100525094,SASH3,100525094:down|ssc:100038026,TNFSF13B,100038026:down|ssc:100271930,IL7R,100271930:down|ssc:397406,FCER1G,397406:down	http://amigo.geneontology.org/cgi-bin/amigo/term_details?term=GO:0002250
negative regulation of growth	Biological Process	GO:0045926	12	65	0.00566034	0.0736357	ssc:100516027,SFRP2,100516027:down|ssc:397093,INHBA,397093:down|ssc:100152419,FRZB,100152419:up|ssc:100127483,BMPR2,100127483:down|ssc:100525983,DCUN1D3,100525983:down|ssc:100153176,SFRP5,100153176:down|ssc:100152462,ACVR1B,100152462:down|ssc:397106,IL10,397106:down|ssc:100525560,CDKN2D,100525560:up|ssc:100113425,BMP4,100113425:down|ssc:396623,TLR2,396623:down|ssc:397038,FBP1,397038:down	http://amigo.geneontology.org/cgi-bin/amigo/term_details?term=GO:0045926
transmembrane receptor protein serine/threonine kinase signaling pathway	Biological Process	GO:0007178	15	90	0.00575203	0.0746596	ssc:100516027,SFRP2,100516027:down|ssc:397093,INHBA,397093:down|ssc:100519746,DAB2,100519746:down|ssc:100127483,BMPR2,100127483:down|ssc:396665,-,396665:down|ssc:100156280,GREM1,100156280:down|ssc:100517990,ZCCHC12,100517990:down|ssc:100521305,SMAD7,100521305:down|ssc:100153791,CYR61,100153791:down|ssc:100512012,WFIKKN2,100512012:up|ssc:654297,CITED1,654297:up|ssc:100152462,ACVR1B,100152462:down|…	http://amigo.geneontology.org/cgi-bin/amigo/term_details?term=GO:0007178
regulation of endopeptidase activity	Biological Process	GO:0052548	16	99	0.00600203	0.077729	ssc:100127489,S100A9,100127489:down|ssc:100513283,APAF1,100513283:down|ssc:100153791,CYR61,100153791:down|ssc:100519286,SERPINB2,100519286:down|ssc:100627352,FAM162A,100627352:up|ssc:100622572,-,100622572:down|ssc:100519335,IFT57,100519335:up|ssc:100516027,SFRP2,100516027:down|ssc:100154994,SERPINB10,100154994:down|ssc:100522360,-,100522360:down|ssc:100520393,SPINK2,100520393:up|ssc:100156882,FUR…	http://amigo.geneontology.org/cgi-bin/amigo/term_details?term=GO:0052548
endothelium development	Biological Process	GO:0003158	7	28	0.00603905	0.0778983	ssc:100519703,F2RL1,100519703:down|ssc:100522839,ID1,100522839:up|ssc:100127483,BMPR2,100127483:down|ssc:100113425,BMP4,100113425:down|ssc:100169702,PROX1,100169702:down|ssc:100152404,HEY2,100152404:down|ssc:100154607,S1PR3,100154607:down	http://amigo.geneontology.org/cgi-bin/amigo/term_details?term=GO:0003158
regulation of protein secretion	Biological Process	GO:0050708	14	82	0.00604231	0.0778983	ssc:399541,TLR4,399541:down|ssc:100738470,NDUFAF2,100738470:up|ssc:100517086,CSF1R,100517086:down|ssc:100515612,C5AR2,100515612:down|ssc:100516668,RABGEF1,100516668:down|ssc:100514142,GCK,100514142:up|ssc:397614,IL4R,397614:down|ssc:397094,IL1A,397094:down|ssc:100522131,FKBP1B,100522131:down|ssc:100519703,F2RL1,100519703:down|ssc:397106,IL10,397106:down|ssc:100518141,C2CD2L,100518141:down|ssc:396…	http://amigo.geneontology.org/cgi-bin/amigo/term_details?term=GO:0050708
cardiac ventricle development	Biological Process	GO:0003231	8	35	0.0061015	0.0778983	ssc:100516027,SFRP2,100516027:down|ssc:100127155,LMO4,100127155:up|ssc:100620499,LUZP1,100620499:down|ssc:654298,ID2,654298:down|ssc:100152404,HEY2,100152404:down|ssc:100521305,SMAD7,100521305:down|ssc:100153791,CYR61,100153791:down|ssc:100169702,PROX1,100169702:down	http://amigo.geneontology.org/cgi-bin/amigo/term_details?term=GO:0003231
activation of innate immune response	Biological Process	GO:0002218	8	35	0.0061015	0.0778983	ssc:399541,TLR4,399541:down|ssc:100627693,RAB7B,100627693:down|ssc:100038025,CLEC7A,100038025:down|ssc:100154350,NFKBIL1,100154350:up|ssc:100519703,F2RL1,100519703:down|ssc:396623,TLR2,396623:down|ssc:397441,CD86,397441:down|ssc:100521986,MAPKAPK2,100521986:down	http://amigo.geneontology.org/cgi-bin/amigo/term_details?term=GO:0002218
regulation of cellular localization	Biological Process	GO:0060341	30	229	0.00613041	0.0778983	ssc:399541,TLR4,399541:down|ssc:396927,ZP3,396927:up|ssc:100522873,EPHA2,100522873:down|ssc:100515612,C5AR2,100515612:down|ssc:100153176,SFRP5,100153176:down|ssc:100516668,RABGEF1,100516668:down|ssc:100514142,GCK,100514142:up|ssc:100521992,HCLS1,100521992:down|ssc:100152038,OSM,100152038:down|ssc:399503,LIF,399503:down|ssc:100113425,BMP4,100113425:down|ssc:100627019,ABL2,100627019:down|ssc:100516…	http://amigo.geneontology.org/cgi-bin/amigo/term_details?term=GO:0060341
antigen processing and presentation of exogenous antigen	Biological Process	GO:0019884	4	10	0.0061881	0.0778983	ssc:445528,HLA-DMA,445528:down|ssc:100174943,IFI30,100174943:down|ssc:396785,CD1A,396785:down|ssc:397406,FCER1G,397406:down	http://amigo.geneontology.org/cgi-bin/amigo/term_details?term=GO:0019884
positive regulation of interleukin-2 production	Biological Process	GO:0032743	4	10	0.0061881	0.0778983	ssc:397094,IL1A,397094:down|ssc:100525094,SASH3,100525094:down|ssc:100620216,-,100620216:down|ssc:100627019,ABL2,100627019:down	http://amigo.geneontology.org/cgi-bin/amigo/term_details?term=GO:0032743
peripheral nervous system development	Biological Process	GO:0007422	4	10	0.0061881	0.0778983	ssc:100152038,OSM,100152038:down|ssc:100516296,EGR3,100516296:down|ssc:100038004,EGR2,100038004:down|ssc:414911,EDNRB,414911:down	http://amigo.geneontology.org/cgi-bin/amigo/term_details?term=GO:0007422
protein destabilization	Biological Process	GO:0031648	4	10	0.0061881	0.0778983	ssc:100522839,ID1,100522839:up|ssc:396969,CTSH,396969:down|ssc:100155795,MYLIP,100155795:up|ssc:100152963,PEX2,100152963:up	http://amigo.geneontology.org/cgi-bin/amigo/term_details?term=GO:0031648
organic hydroxy compound biosynthetic process	Biological Process	GO:1901617	10	50	0.00626374	0.0778983	ssc:100312968,EBP,100312968:up|ssc:494015,SCAP,494015:up|ssc:396628,VDR,396628:down|ssc:654297,CITED1,654297:up|ssc:100169702,PROX1,100169702:down|ssc:397497,FGF1,397497:down|ssc:100153960,NR1H4,100153960:up|ssc:100152963,PEX2,100152963:up|ssc:100518796,SGMS2,100518796:down|ssc:100144446,HMGCR,100144446:up	http://amigo.geneontology.org/cgi-bin/amigo/term_details?term=GO:1901617
response to biotic stimulus	Biological Process	GO:0009607	29	220	0.00640759	0.0778983	ssc:100519446,PLD1,100519446:down|ssc:100521232,DEFB123,100521232:up|ssc:399541,TLR4,399541:down|ssc:396900,AMCF-II,396900:down|ssc:100525528,-,100525528:down|ssc:100154350,NFKBIL1,100154350:up|ssc:100524561,PPBP,100524561:down|ssc:100514958,SLAMF8,100514958:down|ssc:100513746,NOCT,100513746:down|ssc:414371,CCR5,414371:down|ssc:100620216,-,100620216:down|ssc:100127164,PTGER2,100127164:down|ssc:39…	http://amigo.geneontology.org/cgi-bin/amigo/term_details?term=GO:0009607
regulation of lipid metabolic process	Biological Process	GO:0019216	12	66	0.00642136	0.0778983	ssc:100286778,PDK4,100286778:down|ssc:396927,ZP3,396927:up|ssc:396851,PIK3R5,396851:down|ssc:494015,SCAP,494015:up|ssc:396628,VDR,396628:down|ssc:654298,ID2,654298:down|ssc:100153791,CYR61,100153791:down|ssc:100158013,FITM2,100158013:down|ssc:100169702,PROX1,100169702:down|ssc:397497,FGF1,397497:down|ssc:100153960,NR1H4,100153960:up|ssc:100152963,PEX2,100152963:up	http://amigo.geneontology.org/cgi-bin/amigo/term_details?term=GO:0019216
peptidase regulator activity	Molecular Function	GO:0061134	12	66	0.00642136	0.0778983	ssc:100512873,-,100512873:down|ssc:100516027,SFRP2,100516027:down|ssc:100154994,SERPINB10,100154994:down|ssc:100522360,-,100522360:down|ssc:100513283,APAF1,100513283:down|ssc:100522387,CTSC,100522387:up|ssc:100156882,FURIN,100156882:down|ssc:100512012,WFIKKN2,100512012:up|ssc:100519286,SERPINB2,100519286:down|ssc:396969,CTSH,396969:down|ssc:397620,FN1,397620:down|ssc:100622572,-,100622572:down	http://amigo.geneontology.org/cgi-bin/amigo/term_details?term=GO:0061134
Fc-epsilon receptor I complex	Cellular Component	GO:0032998	2	2	0.00665184	0.0778983	ssc:397166,MS4A2,397166:down|ssc:397406,FCER1G,397406:down	http://amigo.geneontology.org/cgi-bin/amigo/term_details?term=GO:0032998
regulation of neutrophil mediated killing of bacterium	Biological Process	GO:0070950	2	2	0.00665184	0.0778983	ssc:396900,AMCF-II,396900:down|ssc:100519703,F2RL1,100519703:down	http://amigo.geneontology.org/cgi-bin/amigo/term_details?term=GO:0070950
interleukin-8 receptor binding	Molecular Function	GO:0005153	2	2	0.00665184	0.0778983	ssc:100620730,-,100620730:down|ssc:396880,-,396880:down	http://amigo.geneontology.org/cgi-bin/amigo/term_details?term=GO:0005153
Fc receptor complex	Cellular Component	GO:0032997	2	2	0.00665184	0.0778983	ssc:397166,MS4A2,397166:down|ssc:397406,FCER1G,397406:down	http://amigo.geneontology.org/cgi-bin/amigo/term_details?term=GO:0032997
Fc receptor mediated stimulatory signaling pathway	Biological Process	GO:0002431	2	2	0.00665184	0.0778983	ssc:100516668,RABGEF1,100516668:down|ssc:397406,FCER1G,397406:down	http://amigo.geneontology.org/cgi-bin/amigo/term_details?term=GO:0002431
GTPase activating protein binding	Molecular Function	GO:0032794	2	2	0.00665184	0.0778983	ssc:100524790,RGS14,100524790:down|ssc:100520585,FMNL1,100520585:down	http://amigo.geneontology.org/cgi-bin/amigo/term_details?term=GO:0032794
regulation of bone mineralization involved in bone maturation	Biological Process	GO:1900157	2	2	0.00665184	0.0778983	ssc:397649,LTF,397649:up|ssc:100156280,GREM1,100156280:down	http://amigo.geneontology.org/cgi-bin/amigo/term_details?term=GO:1900157
planar cell polarity pathway involved in axis elongation	Biological Process	GO:0003402	2	2	0.00665184	0.0778983	ssc:100516027,SFRP2,100516027:down|ssc:100153176,SFRP5,100153176:down	http://amigo.geneontology.org/cgi-bin/amigo/term_details?term=GO:0003402
bile acid signaling pathway	Biological Process	GO:0038183	2	2	0.00665184	0.0778983	ssc:396628,VDR,396628:down|ssc:100153960,NR1H4,100153960:up	http://amigo.geneontology.org/cgi-bin/amigo/term_details?term=GO:0038183
positive regulation of transcription from RNA polymerase II promoter involved in heart development	Biological Process	GO:1901228	2	2	0.00665184	0.0778983	ssc:100155958,SRF,100155958:down|ssc:100156280,GREM1,100156280:down	http://amigo.geneontology.org/cgi-bin/amigo/term_details?term=GO:1901228
regulation of defense response to bacterium	Biological Process	GO:1900424	2	2	0.00665184	0.0778983	ssc:396900,AMCF-II,396900:down|ssc:100519703,F2RL1,100519703:down	http://amigo.geneontology.org/cgi-bin/amigo/term_details?term=GO:1900424
negative regulation of bile acid biosynthetic process	Biological Process	GO:0070858	2	2	0.00665184	0.0778983	ssc:100169702,PROX1,100169702:down|ssc:100153960,NR1H4,100153960:up	http://amigo.geneontology.org/cgi-bin/amigo/term_details?term=GO:0070858
convergent extension involved in axis elongation	Biological Process	GO:0060028	2	2	0.00665184	0.0778983	ssc:100516027,SFRP2,100516027:down|ssc:100153176,SFRP5,100153176:down	http://amigo.geneontology.org/cgi-bin/amigo/term_details?term=GO:0060028
negative regulation of bile acid metabolic process	Biological Process	GO:1904252	2	2	0.00665184	0.0778983	ssc:100169702,PROX1,100169702:down|ssc:100153960,NR1H4,100153960:up	http://amigo.geneontology.org/cgi-bin/amigo/term_details?term=GO:1904252
cellular response to prostaglandin stimulus	Biological Process	GO:0071379	2	2	0.00665184	0.0778983	ssc:100127164,PTGER2,100127164:down|ssc:100524418,PTGDR,100524418:down	http://amigo.geneontology.org/cgi-bin/amigo/term_details?term=GO:0071379
negative regulation of non-canonical Wnt signaling pathway	Biological Process	GO:2000051	2	2	0.00665184	0.0778983	ssc:100516027,SFRP2,100516027:down|ssc:100153176,SFRP5,100153176:down	http://amigo.geneontology.org/cgi-bin/amigo/term_details?term=GO:2000051
oligosaccharide catabolic process	Biological Process	GO:0009313	2	2	0.00665184	0.0778983	ssc:100124381,NEU1,100124381:down|ssc:100515283,GM2A,100515283:down	http://amigo.geneontology.org/cgi-bin/amigo/term_details?term=GO:0009313
response to prostaglandin	Biological Process	GO:0034694	2	2	0.00665184	0.0778983	ssc:100127164,PTGER2,100127164:down|ssc:100524418,PTGDR,100524418:down	http://amigo.geneontology.org/cgi-bin/amigo/term_details?term=GO:0034694
vein smooth muscle contraction	Biological Process	GO:0014826	2	2	0.00665184	0.0778983	ssc:414911,EDNRB,414911:down|ssc:100049663,EDN3,100049663:up	http://amigo.geneontology.org/cgi-bin/amigo/term_details?term=GO:0014826
regulation of planar cell polarity pathway involved in axis elongation	Biological Process	GO:2000040	2	2	0.00665184	0.0778983	ssc:100516027,SFRP2,100516027:down|ssc:100153176,SFRP5,100153176:down	http://amigo.geneontology.org/cgi-bin/amigo/term_details?term=GO:2000040
positive regulation of transcription from RNA polymerase II promoter involved in myocardial precursor cell differentiation	Biological Process	GO:0003257	2	2	0.00665184	0.0778983	ssc:100155958,SRF,100155958:down|ssc:100156280,GREM1,100156280:down	http://amigo.geneontology.org/cgi-bin/amigo/term_details?term=GO:0003257
regulation of receptor catabolic process	Biological Process	GO:2000644	2	2	0.00665184	0.0778983	ssc:100156882,FURIN,100156882:down|ssc:100155795,MYLIP,100155795:up	http://amigo.geneontology.org/cgi-bin/amigo/term_details?term=GO:2000644
bile acid receptor activity	Molecular Function	GO:0038181	2	2	0.00665184	0.0778983	ssc:396628,VDR,396628:down|ssc:100153960,NR1H4,100153960:up	http://amigo.geneontology.org/cgi-bin/amigo/term_details?term=GO:0038181
negative regulation of interleukin-6 secretion	Biological Process	GO:1900165	2	2	0.00665184	0.0778983	ssc:100516668,RABGEF1,100516668:down|ssc:100515612,C5AR2,100515612:down	http://amigo.geneontology.org/cgi-bin/amigo/term_details?term=GO:1900165
negative regulation of planar cell polarity pathway involved in axis elongation	Biological Process	GO:2000041	2	2	0.00665184	0.0778983	ssc:100516027,SFRP2,100516027:down|ssc:100153176,SFRP5,100153176:down	http://amigo.geneontology.org/cgi-bin/amigo/term_details?term=GO:2000041
regulation of neutrophil mediated cytotoxicity	Biological Process	GO:0070948	2	2	0.00665184	0.0778983	ssc:396900,AMCF-II,396900:down|ssc:100519703,F2RL1,100519703:down	http://amigo.geneontology.org/cgi-bin/amigo/term_details?term=GO:0070948
negative regulation of bone development	Biological Process	GO:1903011	2	2	0.00665184	0.0778983	ssc:397649,LTF,397649:up|ssc:100156280,GREM1,100156280:down	http://amigo.geneontology.org/cgi-bin/amigo/term_details?term=GO:1903011
chemokine (C-C motif) ligand 5 binding	Molecular Function	GO:0071791	2	2	0.00665184	0.0778983	ssc:414371,CCR5,414371:down|ssc:414374,CCR1,414374:down	http://amigo.geneontology.org/cgi-bin/amigo/term_details?term=GO:0071791
regulation of neutrophil mediated killing of symbiont cell	Biological Process	GO:0070949	2	2	0.00665184	0.0778983	ssc:396900,AMCF-II,396900:down|ssc:100519703,F2RL1,100519703:down	http://amigo.geneontology.org/cgi-bin/amigo/term_details?term=GO:0070949
negative regulation of mesenchymal cell proliferation	Biological Process	GO:0072201	2	2	0.00665184	0.0778983	ssc:100113425,BMP4,100113425:down|ssc:100155995,NFIB,100155995:up	http://amigo.geneontology.org/cgi-bin/amigo/term_details?term=GO:0072201
regulation of low-density lipoprotein particle receptor catabolic process	Biological Process	GO:0032803	2	2	0.00665184	0.0778983	ssc:100156882,FURIN,100156882:down|ssc:100155795,MYLIP,100155795:up	http://amigo.geneontology.org/cgi-bin/amigo/term_details?term=GO:0032803
regulation of neutrophil mediated killing of gram-negative bacterium	Biological Process	GO:0070951	2	2	0.00665184	0.0778983	ssc:396900,AMCF-II,396900:down|ssc:100519703,F2RL1,100519703:down	http://amigo.geneontology.org/cgi-bin/amigo/term_details?term=GO:0070951
low-density lipoprotein particle receptor catabolic process	Biological Process	GO:0032802	2	2	0.00665184	0.0778983	ssc:100156882,FURIN,100156882:down|ssc:100155795,MYLIP,100155795:up	http://amigo.geneontology.org/cgi-bin/amigo/term_details?term=GO:0032802
lens fiber cell morphogenesis	Biological Process	GO:0070309	2	2	0.00665184	0.0778983	ssc:100522873,EPHA2,100522873:down|ssc:100169702,PROX1,100169702:down	http://amigo.geneontology.org/cgi-bin/amigo/term_details?term=GO:0070309
positive regulation of transport	Biological Process	GO:0051050	21	145	0.00671847	0.0785187	ssc:396927,ZP3,396927:up|ssc:100127489,S100A9,100127489:down|ssc:100514142,GCK,100514142:up|ssc:100521992,HCLS1,100521992:down|ssc:100113425,BMP4,100113425:down|ssc:100627019,ABL2,100627019:down|ssc:100516027,SFRP2,100516027:down|ssc:100519746,DAB2,100519746:down|ssc:503666,P2RY1,503666:down|ssc:100156280,GREM1,100156280:down|ssc:100517086,CSF1R,100517086:down|ssc:100049663,EDN3,100049663:up|ssc:…	http://amigo.geneontology.org/cgi-bin/amigo/term_details?term=GO:0051050
blood vessel morphogenesis	Biological Process	GO:0048514	20	136	0.00680499	0.0793686	ssc:100522873,EPHA2,100522873:down|ssc:100621027,CX3CL1,100621027:down|ssc:100152404,HEY2,100152404:down|ssc:100511141,VASH1,100511141:down|ssc:100153791,CYR61,100153791:down|ssc:100155958,SRF,100155958:down|ssc:100622445,ELK3,100622445:down|ssc:100516296,EGR3,100516296:down|ssc:100113425,BMP4,100113425:down|ssc:100169702,PROX1,100169702:down|ssc:397497,FGF1,397497:down|ssc:397063,ITGB3,397063:do…	http://amigo.geneontology.org/cgi-bin/amigo/term_details?term=GO:0048514
negative regulation of gene expression	Biological Process	GO:0010629	49	423	0.00685277	0.079764	ssc:396927,ZP3,396927:up|ssc:396951,PTHLH,396951:up|ssc:396628,VDR,396628:down|ssc:100152404,HEY2,100152404:down|ssc:100625349,MXD1,100625349:down|ssc:100153176,SFRP5,100153176:down|ssc:100515035,GMNN,100515035:up|ssc:780421,CMKLR1,780421:down|ssc:100521992,HCLS1,100521992:down|ssc:100622572,-,100622572:down|ssc:100153960,NR1H4,100153960:up|ssc:100518125,YBX3,100518125:up|ssc:100154994,SERPINB10,…	http://amigo.geneontology.org/cgi-bin/amigo/term_details?term=GO:0010629
positive regulation of lymphocyte differentiation	Biological Process	GO:0045621	6	22	0.0069131	0.0803024	ssc:397246,VNN1,397246:up|ssc:397614,IL4R,397614:down|ssc:445528,HLA-DMA,445528:down|ssc:100525094,SASH3,100525094:down|ssc:100516296,EGR3,100516296:down|ssc:100271930,IL7R,100271930:down	http://amigo.geneontology.org/cgi-bin/amigo/term_details?term=GO:0045621
negative regulation of cellular protein metabolic process	Biological Process	GO:0032269	30	231	0.00693889	0.0803024	ssc:100512873,-,100512873:down|ssc:100523837,PRR5L,100523837:down|ssc:100517189,CTDSPL,100517189:up|ssc:100153176,SFRP5,100153176:down|ssc:100516668,RABGEF1,100516668:down|ssc:100519286,SERPINB2,100519286:down|ssc:399503,LIF,399503:down|ssc:100144523,PMEPA1,100144523:down|ssc:100625570,C3orf33,100625570:up|ssc:100525894,DUSP26,100525894:down|ssc:100113425,BMP4,100113425:down|ssc:100622572,-,10062…	http://amigo.geneontology.org/cgi-bin/amigo/term_details?term=GO:0032269
negative regulation of metabolic process	Biological Process	GO:0009892	67	614	0.00694092	0.0803024	ssc:100270814,-,100270814:down|ssc:100152404,HEY2,100152404:down|ssc:100625349,MXD1,100625349:down|ssc:100153176,SFRP5,100153176:down|ssc:780421,CMKLR1,780421:down|ssc:100144523,PMEPA1,100144523:down|ssc:100154994,SERPINB10,100154994:down|ssc:100522360,-,100522360:down|ssc:654298,ID2,654298:down|ssc:100155995,NFIB,100155995:up|ssc:100512012,WFIKKN2,100512012:up|ssc:396766,CELA1,396766:up|ssc:1005…	http://amigo.geneontology.org/cgi-bin/amigo/term_details?term=GO:0009892
cytoplasmic part	Cellular Component	GO:0044444	171	1791	0.00702028	0.0810386	ssc:100519446,PLD1,100519446:down|ssc:497237,SCG2,497237:down|ssc:100286778,PDK4,100286778:down|ssc:396851,PIK3R5,396851:down|ssc:100621675,-,100621675:down|ssc:100145894,JTB,100145894:up|ssc:733605,NDUFB6,733605:up|ssc:100144523,PMEPA1,100144523:down|ssc:100156168,PRSS35,100156168:down|ssc:397620,FN1,397620:down|ssc:100519335,IFT57,100519335:up|ssc:100037287,DDO,100037287:up|ssc:100155367,RAP2A,…	http://amigo.geneontology.org/cgi-bin/amigo/term_details?term=GO:0044444
regulation of cellular component organization	Biological Process	GO:0051128	50	434	0.00703274	0.0810386	ssc:100524615,ARID5A,100524615:down|ssc:100127155,LMO4,100127155:up|ssc:100522873,EPHA2,100522873:down|ssc:100127489,S100A9,100127489:down|ssc:100525983,DCUN1D3,100525983:down|ssc:100152404,HEY2,100152404:down|ssc:100621675,-,100621675:down|ssc:397492,DPP4,397492:down|ssc:396665,-,396665:down|ssc:100521992,HCLS1,100521992:down|ssc:100152038,OSM,100152038:down|ssc:100627352,FAM162A,100627352:up|ss…	http://amigo.geneontology.org/cgi-bin/amigo/term_details?term=GO:0051128
blood vessel development	Biological Process	GO:0001568	22	155	0.00712129	0.0818948	ssc:100522873,EPHA2,100522873:down|ssc:100621027,CX3CL1,100621027:down|ssc:100127483,BMPR2,100127483:down|ssc:100152404,HEY2,100152404:down|ssc:100511141,VASH1,100511141:down|ssc:100153791,CYR61,100153791:down|ssc:100155958,SRF,100155958:down|ssc:100622445,ELK3,100622445:down|ssc:100516296,EGR3,100516296:down|ssc:100113425,BMP4,100113425:down|ssc:100169702,PROX1,100169702:down|ssc:397497,FGF1,397…	http://amigo.geneontology.org/cgi-bin/amigo/term_details?term=GO:0001568
regulation of angiogenesis	Biological Process	GO:0045765	10	51	0.00723928	0.0830855	ssc:100516027,SFRP2,100516027:down|ssc:100522873,EPHA2,100522873:down|ssc:100621027,CX3CL1,100621027:down|ssc:396865,CHI3L1,396865:down|ssc:100156280,GREM1,100156280:down|ssc:100511141,VASH1,100511141:down|ssc:396969,CTSH,396969:down|ssc:100522839,ID1,100522839:up|ssc:397094,IL1A,397094:down|ssc:397497,FGF1,397497:down	http://amigo.geneontology.org/cgi-bin/amigo/term_details?term=GO:0045765
steroid metabolic process	Biological Process	GO:0008202	12	67	0.00726101	0.0831586	ssc:100312968,EBP,100312968:up|ssc:100147712,HSD17B1,100147712:down|ssc:494015,SCAP,494015:up|ssc:396628,VDR,396628:down|ssc:100169702,PROX1,100169702:down|ssc:397497,FGF1,397497:down|ssc:100153960,NR1H4,100153960:up|ssc:100152963,PEX2,100152963:up|ssc:403330,CYP17A1,403330:down|ssc:100144446,HMGCR,100144446:up|ssc:100157868,CH25H,100157868:down|ssc:397680,NR0B1,397680:up	http://amigo.geneontology.org/cgi-bin/amigo/term_details?term=GO:0008202
positive regulation of endothelial cell proliferation	Biological Process	GO:0001938	5	16	0.00727457	0.0831586	ssc:100127483,BMPR2,100127483:down|ssc:100516296,EGR3,100516296:down|ssc:100113425,BMP4,100113425:down|ssc:100169702,PROX1,100169702:down|ssc:396665,-,396665:down	http://amigo.geneontology.org/cgi-bin/amigo/term_details?term=GO:0001938
phagocytosis	Biological Process	GO:0006909	8	36	0.00729895	0.0832717	ssc:100627693,RAB7B,100627693:down|ssc:100038025,CLEC7A,100038025:down|ssc:100524095,PLD4,100524095:down|ssc:100519703,F2RL1,100519703:down|ssc:100522109,ELMO1,100522109:down|ssc:397271,AIF1,397271:down|ssc:397406,FCER1G,397406:down|ssc:100627019,ABL2,100627019:down	http://amigo.geneontology.org/cgi-bin/amigo/term_details?term=GO:0006909
phosphatidylinositol-mediated signaling	Biological Process	GO:0048015	7	29	0.00741379	0.0840815	ssc:100519703,F2RL1,100519703:down|ssc:100521992,HCLS1,100521992:down|ssc:396927,ZP3,396927:up|ssc:396851,PIK3R5,396851:down|ssc:100523837,PRR5L,100523837:down|ssc:100517086,CSF1R,100517086:down|ssc:100516729,STAMBP,100516729:down	http://amigo.geneontology.org/cgi-bin/amigo/term_details?term=GO:0048015
cardiac septum development	Biological Process	GO:0003279	7	29	0.00741379	0.0840815	ssc:100153791,CYR61,100153791:down|ssc:100521305,SMAD7,100521305:down|ssc:100127155,LMO4,100127155:up|ssc:100620499,LUZP1,100620499:down|ssc:654298,ID2,654298:down|ssc:100169702,PROX1,100169702:down|ssc:100152404,HEY2,100152404:down	http://amigo.geneontology.org/cgi-bin/amigo/term_details?term=GO:0003279
inositol lipid-mediated signaling	Biological Process	GO:0048017	7	29	0.00741379	0.0840815	ssc:100519703,F2RL1,100519703:down|ssc:100521992,HCLS1,100521992:down|ssc:396927,ZP3,396927:up|ssc:396851,PIK3R5,396851:down|ssc:100523837,PRR5L,100523837:down|ssc:100517086,CSF1R,100517086:down|ssc:100516729,STAMBP,100516729:down	http://amigo.geneontology.org/cgi-bin/amigo/term_details?term=GO:0048017
endosome	Cellular Component	GO:0005768	21	147	0.00785443	0.0889034	ssc:100519446,PLD1,100519446:down|ssc:100627693,RAB7B,100627693:down|ssc:396927,ZP3,396927:up|ssc:396846,ZP2,396846:up|ssc:100516668,RABGEF1,100516668:down|ssc:100152055,NCF4,100152055:down|ssc:445528,HLA-DMA,445528:down|ssc:414371,CCR5,414371:down|ssc:100155895,ARRDC4,100155895:down|ssc:100144523,PMEPA1,100144523:down|ssc:100524550,VPS37D,100524550:up|ssc:396785,CD1A,396785:down|ssc:100513526,MA…	http://amigo.geneontology.org/cgi-bin/amigo/term_details?term=GO:0005768
regulation of metabolic process	Biological Process	GO:0019222	151	1563	0.0079304	0.089587	ssc:100270814,-,100270814:down|ssc:100286778,PDK4,100286778:down|ssc:397122,IL1B1,397122:down|ssc:396851,PIK3R5,396851:down|ssc:100152404,HEY2,100152404:down|ssc:100153460,AKAP5,100153460:down|ssc:100621675,-,100621675:down|ssc:396665,-,396665:down|ssc:100145894,JTB,100145894:up|ssc:780421,CMKLR1,780421:down|ssc:100144523,PMEPA1,100144523:down|ssc:397620,FN1,397620:down|ssc:100519335,IFT57,100519…	http://amigo.geneontology.org/cgi-bin/amigo/term_details?term=GO:0019222
positive regulation of proteolysis	Biological Process	GO:0045862	12	68	0.00818466	0.092278	ssc:100516027,SFRP2,100516027:down|ssc:100620511,CLEC3B,100620511:up|ssc:100519746,DAB2,100519746:down|ssc:100127489,S100A9,100127489:down|ssc:100513283,APAF1,100513283:down|ssc:100521305,SMAD7,100521305:down|ssc:100153791,CYR61,100153791:down|ssc:100522018,GCLC,100522018:down|ssc:396969,CTSH,396969:down|ssc:100627352,FAM162A,100627352:up|ssc:397620,FN1,397620:down|ssc:100519335,IFT57,100519335:up	http://amigo.geneontology.org/cgi-bin/amigo/term_details?term=GO:0045862
external side of plasma membrane	Cellular Component	GO:0009897	11	60	0.00835444	0.0940078	ssc:100155091,ITGA5,100155091:down|ssc:397166,MS4A2,397166:down|ssc:396853,-,396853:up|ssc:414374,CCR1,414374:down|ssc:100127147,SELL,100127147:down|ssc:414371,CCR5,414371:down|ssc:100271930,IL7R,100271930:down|ssc:397406,FCER1G,397406:down|ssc:396623,TLR2,396623:down|ssc:397063,ITGB3,397063:down|ssc:397441,CD86,397441:down	http://amigo.geneontology.org/cgi-bin/amigo/term_details?term=GO:0009897
apoptotic signaling pathway	Biological Process	GO:0097190	21	148	0.00847844	0.0952169	ssc:100522873,EPHA2,100522873:down|ssc:100621027,CX3CL1,100621027:down|ssc:100127489,S100A9,100127489:down|ssc:100513283,APAF1,100513283:down|ssc:100522387,CTSC,100522387:up|ssc:100152038,OSM,100152038:down|ssc:100627352,FAM162A,100627352:up|ssc:100518125,YBX3,100518125:up|ssc:100516027,SFRP2,100516027:down|ssc:397093,INHBA,397093:down|ssc:100519746,DAB2,100519746:down|ssc:397246,VNN1,397246:up|s…	http://amigo.geneontology.org/cgi-bin/amigo/term_details?term=GO:0097190
negative regulation of epithelial cell proliferation	Biological Process	GO:0050680	8	37	0.0086653	0.0971257	ssc:100516027,SFRP2,100516027:down|ssc:396628,VDR,396628:down|ssc:100155995,NFIB,100155995:up|ssc:100511141,VASH1,100511141:down|ssc:100113425,BMP4,100113425:down|ssc:100038002,ATPIF1,100038002:up|ssc:100152963,PEX2,100152963:up|ssc:100519335,IFT57,100519335:up	http://amigo.geneontology.org/cgi-bin/amigo/term_details?term=GO:0050680
regulation of peptidyl-serine phosphorylation	Biological Process	GO:0033135	6	23	0.00872211	0.097167	ssc:100516027,SFRP2,100516027:down|ssc:100521305,SMAD7,100521305:down|ssc:100521992,HCLS1,100521992:down|ssc:100152038,OSM,100152038:down|ssc:399503,LIF,399503:down|ssc:397495,BDNF,397495:down	http://amigo.geneontology.org/cgi-bin/amigo/term_details?term=GO:0033135
negative regulation of ossification	Biological Process	GO:0030279	6	23	0.00872211	0.097167	ssc:654297,CITED1,654297:up|ssc:100513746,NOCT,100513746:down|ssc:100522839,ID1,100522839:up|ssc:654298,ID2,654298:down|ssc:100156280,GREM1,100156280:down|ssc:414374,CCR1,414374:down	http://amigo.geneontology.org/cgi-bin/amigo/term_details?term=GO:0030279
regulation of developmental growth	Biological Process	GO:0048638	13	77	0.00880362	0.097167	ssc:100516027,SFRP2,100516027:down|ssc:396927,ZP3,396927:up|ssc:100127483,BMPR2,100127483:down|ssc:100152404,HEY2,100152404:down|ssc:100153176,SFRP5,100153176:down|ssc:100101470,ATRN,100101470:down|ssc:100155958,SRF,100155958:down|ssc:100525094,SASH3,100525094:down|ssc:397547,NPY1R,397547:up|ssc:100113425,BMP4,100113425:down|ssc:100169702,PROX1,100169702:down|ssc:397620,FN1,397620:down|ssc:100518…	http://amigo.geneontology.org/cgi-bin/amigo/term_details?term=GO:0048638
regulation of macrophage differentiation	Biological Process	GO:0045649	3	6	0.00896943	0.097167	ssc:100521992,HCLS1,100521992:down|ssc:399503,LIF,399503:down|ssc:654298,ID2,654298:down	http://amigo.geneontology.org/cgi-bin/amigo/term_details?term=GO:0045649
glutathione transferase activity	Molecular Function	GO:0004364	3	6	0.00896943	0.097167	ssc:100521480,GSTK1,100521480:up|ssc:100153094,-,100153094:up|ssc:397682,-,397682:up	http://amigo.geneontology.org/cgi-bin/amigo/term_details?term=GO:0004364
lymphangiogenesis	Biological Process	GO:0001946	3	6	0.00896943	0.097167	ssc:100127483,BMPR2,100127483:down|ssc:100169702,PROX1,100169702:down|ssc:100511141,VASH1,100511141:down	http://amigo.geneontology.org/cgi-bin/amigo/term_details?term=GO:0001946
positive regulation of thymocyte aggregation	Biological Process	GO:2000400	3	6	0.00896943	0.097167	ssc:397246,VNN1,397246:up|ssc:100516296,EGR3,100516296:down|ssc:100271930,IL7R,100271930:down	http://amigo.geneontology.org/cgi-bin/amigo/term_details?term=GO:2000400
post-anal tail morphogenesis	Biological Process	GO:0036342	3	6	0.00896943	0.097167	ssc:100516027,SFRP2,100516027:down|ssc:100522873,EPHA2,100522873:down|ssc:100153176,SFRP5,100153176:down	http://amigo.geneontology.org/cgi-bin/amigo/term_details?term=GO:0036342
bile acid biosynthetic process	Biological Process	GO:0006699	3	6	0.00896943	0.097167	ssc:100169702,PROX1,100169702:down|ssc:100152963,PEX2,100152963:up|ssc:100153960,NR1H4,100153960:up	http://amigo.geneontology.org/cgi-bin/amigo/term_details?term=GO:0006699
negative regulation of toll-like receptor signaling pathway	Biological Process	GO:0034122	3	6	0.00896943	0.097167	ssc:100627693,RAB7B,100627693:down|ssc:100519703,F2RL1,100519703:down|ssc:100154350,NFKBIL1,100154350:up	http://amigo.geneontology.org/cgi-bin/amigo/term_details?term=GO:0034122
regulation of cholesterol metabolic process	Biological Process	GO:0090181	3	6	0.00896943	0.097167	ssc:494015,SCAP,494015:up|ssc:397497,FGF1,397497:down|ssc:100152963,PEX2,100152963:up	http://amigo.geneontology.org/cgi-bin/amigo/term_details?term=GO:0090181
lymph vessel morphogenesis	Biological Process	GO:0036303	3	6	0.00896943	0.097167	ssc:100127483,BMPR2,100127483:down|ssc:100169702,PROX1,100169702:down|ssc:100511141,VASH1,100511141:down	http://amigo.geneontology.org/cgi-bin/amigo/term_details?term=GO:0036303
positive regulation of granulocyte chemotaxis	Biological Process	GO:0071624	3	6	0.00896943	0.097167	ssc:100621675,-,100621675:down|ssc:100620730,-,100620730:down|ssc:396880,-,396880:down	http://amigo.geneontology.org/cgi-bin/amigo/term_details?term=GO:0071624
positive regulation of T cell differentiation in thymus	Biological Process	GO:0033089	3	6	0.00896943	0.097167	ssc:397246,VNN1,397246:up|ssc:100516296,EGR3,100516296:down|ssc:100271930,IL7R,100271930:down	http://amigo.geneontology.org/cgi-bin/amigo/term_details?term=GO:0033089
regulation of tyrosine phosphorylation of Stat3 protein	Biological Process	GO:0042516	3	6	0.00896943	0.097167	ssc:399503,LIF,399503:down|ssc:397201,JAK2,397201:down|ssc:100517086,CSF1R,100517086:down	http://amigo.geneontology.org/cgi-bin/amigo/term_details?term=GO:0042516
mesenchymal to epithelial transition involved in metanephros morphogenesis	Biological Process	GO:0003337	3	6	0.00896943	0.097167	ssc:399503,LIF,399503:down|ssc:100113425,BMP4,100113425:down|ssc:100156280,GREM1,100156280:down	http://amigo.geneontology.org/cgi-bin/amigo/term_details?term=GO:0003337
peptide biosynthetic process	Biological Process	GO:0043043	3	6	0.00896943	0.097167	ssc:100156882,FURIN,100156882:down|ssc:100522018,GCLC,100522018:down|ssc:100624445,-,100624445:down	http://amigo.geneontology.org/cgi-bin/amigo/term_details?term=GO:0043043
male gonad development	Biological Process	GO:0008584	7	30	0.00900696	0.097167	ssc:100516027,SFRP2,100516027:down|ssc:397093,INHBA,397093:down|ssc:100622249,ARID5B,100622249:down|ssc:100520393,SPINK2,100520393:up|ssc:397024,INSL3,397024:down|ssc:397680,NR0B1,397680:up|ssc:100518125,YBX3,100518125:up	http://amigo.geneontology.org/cgi-bin/amigo/term_details?term=GO:0008584
antigen processing and presentation	Biological Process	GO:0019882	7	30	0.00900696	0.097167	ssc:445528,HLA-DMA,445528:down|ssc:100135050,SLA-DMB,100135050:down|ssc:100174943,IFI30,100174943:down|ssc:100037921,SLA-DQB1,100037921:down|ssc:654289,PROCR,654289:down|ssc:396785,CD1A,396785:down|ssc:397406,FCER1G,397406:down	http://amigo.geneontology.org/cgi-bin/amigo/term_details?term=GO:0019882
development of primary male sexual characteristics	Biological Process	GO:0046546	7	30	0.00900696	0.097167	ssc:100516027,SFRP2,100516027:down|ssc:397093,INHBA,397093:down|ssc:100622249,ARID5B,100622249:down|ssc:100520393,SPINK2,100520393:up|ssc:397024,INSL3,397024:down|ssc:397680,NR0B1,397680:up|ssc:100518125,YBX3,100518125:up	http://amigo.geneontology.org/cgi-bin/amigo/term_details?term=GO:0046546
negative regulation of small GTPase mediated signal transduction	Biological Process	GO:0051058	4	11	0.00910455	0.0974882	ssc:100516668,RABGEF1,100516668:down|ssc:397038,FBP1,397038:down|ssc:100516729,STAMBP,100516729:down|ssc:100627019,ABL2,100627019:down	http://amigo.geneontology.org/cgi-bin/amigo/term_details?term=GO:0051058
negative regulation of Ras protein signal transduction	Biological Process	GO:0046580	4	11	0.00910455	0.0974882	ssc:100516668,RABGEF1,100516668:down|ssc:397038,FBP1,397038:down|ssc:100516729,STAMBP,100516729:down|ssc:100627019,ABL2,100627019:down	http://amigo.geneontology.org/cgi-bin/amigo/term_details?term=GO:0046580
membrane invagination	Biological Process	GO:0010324	4	11	0.00910455	0.0974882	ssc:100522109,ELMO1,100522109:down|ssc:100519703,F2RL1,100519703:down|ssc:397271,AIF1,397271:down|ssc:397406,FCER1G,397406:down	http://amigo.geneontology.org/cgi-bin/amigo/term_details?term=GO:0010324
C-C chemokine receptor activity	Molecular Function	GO:0016493	4	11	0.00910455	0.0974882	ssc:414372,CCR2,414372:down|ssc:100737352,ACKR2,100737352:down|ssc:414371,CCR5,414371:down|ssc:414374,CCR1,414374:down	http://amigo.geneontology.org/cgi-bin/amigo/term_details?term=GO:0016493
regulation of hormone levels	Biological Process	GO:0010817	14	86	0.00923443	0.098512	ssc:397093,INHBA,397093:down|ssc:100738470,NDUFAF2,100738470:up|ssc:100525333,CRYM,100525333:up|ssc:100147712,HSD17B1,100147712:down|ssc:100049663,EDN3,100049663:up|ssc:100156882,FURIN,100156882:down|ssc:100514142,GCK,100514142:up|ssc:100522131,FKBP1B,100522131:down|ssc:399503,LIF,399503:down|ssc:100152038,OSM,100152038:down|ssc:100518141,C2CD2L,100518141:down|ssc:100144470,PHEROC,100144470:down|…	http://amigo.geneontology.org/cgi-bin/amigo/term_details?term=GO:0010817
urogenital system development	Biological Process	GO:0001655	14	86	0.00923443	0.098512	ssc:654298,ID2,654298:down|ssc:100156280,GREM1,100156280:down|ssc:397495,BDNF,397495:down|ssc:100521305,SMAD7,100521305:down|ssc:403163,EPCAM,403163:down|ssc:100622249,ARID5B,100622249:down|ssc:396969,CTSH,396969:down|ssc:399503,LIF,399503:down|ssc:100113425,BMP4,100113425:down|ssc:100169702,PROX1,100169702:down|ssc:100511536,MME,100511536:down|ssc:100157004,GCNT1,100157004:down|ssc:397497,FGF1,3…	http://amigo.geneontology.org/cgi-bin/amigo/term_details?term=GO:0001655
positive regulation of peptidyl-serine phosphorylation	Biological Process	GO:0033138	5	17	0.00962688	0.101942	ssc:100516027,SFRP2,100516027:down|ssc:100521992,HCLS1,100521992:down|ssc:100152038,OSM,100152038:down|ssc:399503,LIF,399503:down|ssc:397495,BDNF,397495:down	http://amigo.geneontology.org/cgi-bin/amigo/term_details?term=GO:0033138
positive regulation of inflammatory response	Biological Process	GO:0050729	5	17	0.00962688	0.101942	ssc:396927,ZP3,396927:up|ssc:100621027,CX3CL1,100621027:down|ssc:100127489,S100A9,100127489:down|ssc:396623,TLR2,396623:down|ssc:397406,FCER1G,397406:down	http://amigo.geneontology.org/cgi-bin/amigo/term_details?term=GO:0050729
positive regulation of epithelial cell migration	Biological Process	GO:0010634	5	17	0.00962688	0.101942	ssc:397564,HBEGF,397564:down|ssc:396969,CTSH,396969:down|ssc:100127483,BMPR2,100127483:down|ssc:100113425,BMP4,100113425:down|ssc:100169702,PROX1,100169702:down	http://amigo.geneontology.org/cgi-bin/amigo/term_details?term=GO:0010634
cytokine production involved in immune response	Biological Process	GO:0002367	5	17	0.00962688	0.101942	ssc:100519703,F2RL1,100519703:down|ssc:397106,IL10,397106:down|ssc:100525094,SASH3,100525094:down|ssc:396623,TLR2,396623:down|ssc:397406,FCER1G,397406:down	http://amigo.geneontology.org/cgi-bin/amigo/term_details?term=GO:0002367
positive regulation of MAPK cascade	Biological Process	GO:0043410	17	113	0.00968817	0.102402	ssc:100270814,-,100270814:down|ssc:397122,IL1B1,397122:down|ssc:396851,PIK3R5,396851:down|ssc:100515612,C5AR2,100515612:down|ssc:399503,LIF,399503:down|ssc:100152038,OSM,100152038:down|ssc:100113425,BMP4,100113425:down|ssc:100155615,AVPI1,100155615:up|ssc:100627019,ABL2,100627019:down|ssc:100519746,DAB2,100519746:down|ssc:100517086,CSF1R,100517086:down|ssc:396865,CHI3L1,396865:down|ssc:100049663,…	http://amigo.geneontology.org/cgi-bin/amigo/term_details?term=GO:0043410
lymphocyte differentiation	Biological Process	GO:0030098	13	78	0.00980385	0.103435	ssc:100519177,GIMAP1,100519177:down|ssc:654298,ID2,654298:down|ssc:397246,VNN1,397246:up|ssc:100153546,NHEJ1,100153546:up|ssc:445528,HLA-DMA,445528:down|ssc:100155958,SRF,100155958:down|ssc:397614,IL4R,397614:down|ssc:574055,TNFSF8,574055:down|ssc:100525094,SASH3,100525094:down|ssc:100113425,BMP4,100113425:down|ssc:100516296,EGR3,100516296:down|ssc:100271930,IL7R,100271930:down|ssc:100627019,ABL2…	http://amigo.geneontology.org/cgi-bin/amigo/term_details?term=GO:0030098
peptidase activity, acting on L-amino acid peptides	Molecular Function	GO:0070011	23	169	0.00992697	0.104542	ssc:397319,CASP1,397319:down|ssc:100621642,-,100621642:up|ssc:445538,XPNPEP2,445538:down|ssc:396985,PLAU,396985:down|ssc:397492,DPP4,397492:down|ssc:397320,MMP1,397320:down|ssc:100522387,CTSC,100522387:up|ssc:100520400,YOD1,100520400:down|ssc:100156168,PRSS35,100156168:down|ssc:100620361,-,100620361:down|ssc:397649,LTF,397649:up|ssc:397476,-,397476:up|ssc:100517601,RHBDF2,100517601:down|ssc:10051…	http://amigo.geneontology.org/cgi-bin/amigo/term_details?term=GO:0070011
regulation of hydrolase activity	Biological Process	GO:0051336	26	198	0.0100383	0.105522	ssc:100512873,-,100512873:down|ssc:100127489,S100A9,100127489:down|ssc:100513283,APAF1,100513283:down|ssc:100153791,CYR61,100153791:down|ssc:100154195,-,100154195:down|ssc:100519286,SERPINB2,100519286:down|ssc:100627352,FAM162A,100627352:up|ssc:100520980,CASR,100520980:down|ssc:397620,FN1,397620:down|ssc:100622572,-,100622572:down|ssc:100519335,IFT57,100519335:up|ssc:100627019,ABL2,100627019:down…	http://amigo.geneontology.org/cgi-bin/amigo/term_details?term=GO:0051336
regulation of leukocyte mediated immunity	Biological Process	GO:0002703	8	38	0.0102143	0.107175	ssc:396900,AMCF-II,396900:down|ssc:396927,ZP3,396927:up|ssc:100155631,FES,100155631:down|ssc:100516668,RABGEF1,100516668:down|ssc:100519703,F2RL1,100519703:down|ssc:100525094,SASH3,100525094:down|ssc:397406,FCER1G,397406:down|ssc:100271930,IL7R,100271930:down	http://amigo.geneontology.org/cgi-bin/amigo/term_details?term=GO:0002703
G-protein coupled receptor binding	Molecular Function	GO:0001664	12	70	0.0103059	0.107777	ssc:396900,AMCF-II,396900:down|ssc:100621027,CX3CL1,100621027:down|ssc:494467,CXCL14,494467:down|ssc:100525528,-,100525528:down|ssc:100302703,CCL8,100302703:down|ssc:100622868,CLIC6,100622868:down|ssc:100048958,GNA14,100048958:down|ssc:396880,-,396880:down|ssc:100525396,-,100525396:down|ssc:100524561,PPBP,100524561:down|ssc:414904,CXCL2,414904:down|ssc:100620730,-,100620730:down	http://amigo.geneontology.org/cgi-bin/amigo/term_details?term=GO:0001664
negative regulation of protein modification process	Biological Process	GO:0031400	19	132	0.0103091	0.107777	ssc:100523837,PRR5L,100523837:down|ssc:100517189,CTDSPL,100517189:up|ssc:100153176,SFRP5,100153176:down|ssc:100516668,RABGEF1,100516668:down|ssc:399503,LIF,399503:down|ssc:100144523,PMEPA1,100144523:down|ssc:100625570,C3orf33,100625570:up|ssc:100525894,DUSP26,100525894:down|ssc:100113425,BMP4,100113425:down|ssc:100516027,SFRP2,100516027:down|ssc:733670,RGS2,733670:up|ssc:100156280,GREM1,100156280…	http://amigo.geneontology.org/cgi-bin/amigo/term_details?term=GO:0031400
negative regulation of molecular function	Biological Process	GO:0044092	31	248	0.0105325	0.109913	ssc:100512873,-,100512873:down|ssc:396951,PTHLH,396951:up|ssc:100152404,HEY2,100152404:down|ssc:100153176,SFRP5,100153176:down|ssc:100154350,NFKBIL1,100154350:up|ssc:780421,CMKLR1,780421:down|ssc:100519286,SERPINB2,100519286:down|ssc:100152325,CHCHD10,100152325:up|ssc:100525894,DUSP26,100525894:down|ssc:100113425,BMP4,100113425:down|ssc:100169702,PROX1,100169702:down|ssc:100622572,-,100622572:dow…	http://amigo.geneontology.org/cgi-bin/amigo/term_details?term=GO:0044092
tube development	Biological Process	GO:0035295	26	199	0.0106904	0.111358	ssc:100127155,LMO4,100127155:up|ssc:100522873,EPHA2,100522873:down|ssc:396951,PTHLH,396951:up|ssc:396628,VDR,396628:down|ssc:100127483,BMPR2,100127483:down|ssc:397495,BDNF,397495:down|ssc:100153176,SFRP5,100153176:down|ssc:100516960,SLC12A2,100516960:down|ssc:399503,LIF,399503:down|ssc:100155958,SRF,100155958:down|ssc:100113425,BMP4,100113425:down|ssc:100169702,PROX1,100169702:down|ssc:397497,FGF…	http://amigo.geneontology.org/cgi-bin/amigo/term_details?term=GO:0035295
cardiac chamber development	Biological Process	GO:0003205	9	46	0.0107711	0.111769	ssc:100516027,SFRP2,100516027:down|ssc:100127155,LMO4,100127155:up|ssc:100620499,LUZP1,100620499:down|ssc:654298,ID2,654298:down|ssc:100152404,HEY2,100152404:down|ssc:100521305,SMAD7,100521305:down|ssc:100153791,CYR61,100153791:down|ssc:100155958,SRF,100155958:down|ssc:100169702,PROX1,100169702:down	http://amigo.geneontology.org/cgi-bin/amigo/term_details?term=GO:0003205
positive regulation of angiogenesis	Biological Process	GO:0045766	7	31	0.0108373	0.111769	ssc:100516027,SFRP2,100516027:down|ssc:397094,IL1A,397094:down|ssc:396969,CTSH,396969:down|ssc:100621027,CX3CL1,100621027:down|ssc:397497,FGF1,397497:down|ssc:396865,CHI3L1,396865:down|ssc:100156280,GREM1,100156280:down	http://amigo.geneontology.org/cgi-bin/amigo/term_details?term=GO:0045766
pathway-restricted SMAD protein phosphorylation	Biological Process	GO:0060389	6	24	0.0108465	0.111769	ssc:100521305,SMAD7,100521305:down|ssc:100519746,DAB2,100519746:down|ssc:100144523,PMEPA1,100144523:down|ssc:100127483,BMPR2,100127483:down|ssc:100113425,BMP4,100113425:down|ssc:100156280,GREM1,100156280:down	http://amigo.geneontology.org/cgi-bin/amigo/term_details?term=GO:0060389
T cell differentiation in thymus	Biological Process	GO:0033077	6	24	0.0108465	0.111769	ssc:397246,VNN1,397246:up|ssc:100155958,SRF,100155958:down|ssc:445528,HLA-DMA,445528:down|ssc:100516296,EGR3,100516296:down|ssc:100113425,BMP4,100113425:down|ssc:100271930,IL7R,100271930:down	http://amigo.geneontology.org/cgi-bin/amigo/term_details?term=GO:0033077
thymocyte aggregation	Biological Process	GO:0071594	6	24	0.0108465	0.111769	ssc:397246,VNN1,397246:up|ssc:100155958,SRF,100155958:down|ssc:445528,HLA-DMA,445528:down|ssc:100516296,EGR3,100516296:down|ssc:100113425,BMP4,100113425:down|ssc:100271930,IL7R,100271930:down	http://amigo.geneontology.org/cgi-bin/amigo/term_details?term=GO:0071594
regulation of pathway-restricted SMAD protein phosphorylation	Biological Process	GO:0060393	6	24	0.0108465	0.111769	ssc:100521305,SMAD7,100521305:down|ssc:100519746,DAB2,100519746:down|ssc:100144523,PMEPA1,100144523:down|ssc:100127483,BMPR2,100127483:down|ssc:100113425,BMP4,100113425:down|ssc:100156280,GREM1,100156280:down	http://amigo.geneontology.org/cgi-bin/amigo/term_details?term=GO:0060393
mesenchymal cell differentiation	Biological Process	GO:0048762	10	54	0.0108795	0.111909	ssc:100516027,SFRP2,100516027:down|ssc:100152419,FRZB,100152419:up|ssc:100519746,DAB2,100519746:down|ssc:100152404,HEY2,100152404:down|ssc:396665,-,396665:down|ssc:100156280,GREM1,100156280:down|ssc:100049663,EDN3,100049663:up|ssc:100524216,FAM101B,100524216:down|ssc:100113425,BMP4,100113425:down|ssc:414911,EDNRB,414911:down	http://amigo.geneontology.org/cgi-bin/amigo/term_details?term=GO:0048762
regulation of system process	Biological Process	GO:0044057	15	97	0.0114663	0.117735	ssc:397093,INHBA,397093:down|ssc:396724,OLR1,396724:down|ssc:100621502,-,100621502:up|ssc:100127483,BMPR2,100127483:down|ssc:733670,RGS2,733670:up|ssc:100152404,HEY2,100152404:down|ssc:100049663,EDN3,100049663:up|ssc:100623651,DSC2,100623651:down|ssc:397564,HBEGF,397564:down|ssc:100521305,SMAD7,100521305:down|ssc:100519703,F2RL1,100519703:down|ssc:100155958,SRF,100155958:down|ssc:100522131,FKBP1B…	http://amigo.geneontology.org/cgi-bin/amigo/term_details?term=GO:0044057
anatomical structure morphogenesis	Biological Process	GO:0009653	68	639	0.011513	0.117963	ssc:100127155,LMO4,100127155:up|ssc:100522873,EPHA2,100522873:down|ssc:100621027,CX3CL1,100621027:down|ssc:100152404,HEY2,100152404:down|ssc:396665,-,396665:down|ssc:100153176,SFRP5,100153176:down|ssc:100521487,WEE1,100521487:down|ssc:397620,FN1,397620:down|ssc:100519335,IFT57,100519335:up|ssc:654298,ID2,654298:down|ssc:100517086,CSF1R,100517086:down|ssc:100038004,EGR2,100038004:down|ssc:10051927…	http://amigo.geneontology.org/cgi-bin/amigo/term_details?term=GO:0009653
regulation of apoptotic signaling pathway	Biological Process	GO:2001233	16	106	0.0115296	0.117963	ssc:100621027,CX3CL1,100621027:down|ssc:100127489,S100A9,100127489:down|ssc:100522387,CTSC,100522387:up|ssc:100152038,OSM,100152038:down|ssc:100627352,FAM162A,100627352:up|ssc:100518125,YBX3,100518125:up|ssc:100516027,SFRP2,100516027:down|ssc:397093,INHBA,397093:down|ssc:100519746,DAB2,100519746:down|ssc:100513653,SLC35F6,100513653:down|ssc:397246,VNN1,397246:up|ssc:100522018,GCLC,100522018:down|…	http://amigo.geneontology.org/cgi-bin/amigo/term_details?term=GO:2001233
negative regulation of secretion by cell	Biological Process	GO:1903531	8	39	0.0119595	0.121497	ssc:100738470,NDUFAF2,100738470:up|ssc:100515612,C5AR2,100515612:down|ssc:100516668,RABGEF1,100516668:down|ssc:100522131,FKBP1B,100522131:down|ssc:399503,LIF,399503:down|ssc:100152038,OSM,100152038:down|ssc:100519703,F2RL1,100519703:down|ssc:397106,IL10,397106:down	http://amigo.geneontology.org/cgi-bin/amigo/term_details?term=GO:1903531
receptor-mediated endocytosis	Biological Process	GO:0006898	8	39	0.0119595	0.121497	ssc:100621457,-,100621457:down|ssc:100519746,DAB2,100519746:down|ssc:100156280,GREM1,100156280:down|ssc:100516668,RABGEF1,100516668:down|ssc:100737352,ACKR2,100737352:down|ssc:100037292,ACKR4,100037292:down|ssc:733630,VLDLR,733630:up|ssc:100511665,MSR1,100511665:down	http://amigo.geneontology.org/cgi-bin/amigo/term_details?term=GO:0006898
regulation of heart contraction	Biological Process	GO:0008016	8	39	0.0119595	0.121497	ssc:100621502,-,100621502:up|ssc:733670,RGS2,733670:up|ssc:100152404,HEY2,100152404:down|ssc:100049663,EDN3,100049663:up|ssc:100521305,SMAD7,100521305:down|ssc:397564,HBEGF,397564:down|ssc:100623651,DSC2,100623651:down|ssc:100522131,FKBP1B,100522131:down	http://amigo.geneontology.org/cgi-bin/amigo/term_details?term=GO:0008016
receptor signaling protein activity	Molecular Function	GO:0005057	8	39	0.0119595	0.121497	ssc:100126293,CASS4,100126293:down|ssc:100127483,BMPR2,100127483:down|ssc:396665,-,396665:down|ssc:100521305,SMAD7,100521305:down|ssc:100152025,DOK2,100152025:down|ssc:100523692,KCNH4,100523692:down|ssc:100152462,ACVR1B,100152462:down|ssc:100524790,RGS14,100524790:down	http://amigo.geneontology.org/cgi-bin/amigo/term_details?term=GO:0005057
skeletal system development	Biological Process	GO:0001501	19	134	0.0120347	0.122046	ssc:100524615,ARID5A,100524615:down|ssc:100522873,EPHA2,100522873:down|ssc:396951,PTHLH,396951:up|ssc:396628,VDR,396628:down|ssc:100127483,BMPR2,100127483:down|ssc:100153791,CYR61,100153791:down|ssc:100622249,ARID5B,100622249:down|ssc:100155958,SRF,100155958:down|ssc:100113425,BMP4,100113425:down|ssc:100516027,SFRP2,100516027:down|ssc:397649,LTF,397649:up|ssc:100152419,FRZB,100152419:up|ssc:10062…	http://amigo.geneontology.org/cgi-bin/amigo/term_details?term=GO:0001501
negative regulation of apoptotic process	Biological Process	GO:0043066	26	201	0.0120979	0.122469	ssc:100286778,PDK4,100286778:down|ssc:100621027,CX3CL1,100621027:down|ssc:100152404,HEY2,100152404:down|ssc:397495,BDNF,397495:down|ssc:100153791,CYR61,100153791:down|ssc:100156860,BCL2A1,100156860:down|ssc:100519286,SERPINB2,100519286:down|ssc:100521992,HCLS1,100521992:down|ssc:100516296,EGR3,100516296:down|ssc:100113425,BMP4,100113425:down|ssc:100627019,ABL2,100627019:down|ssc:100518125,YBX3,10…	http://amigo.geneontology.org/cgi-bin/amigo/term_details?term=GO:0043066
regulation of transferase activity	Biological Process	GO:0051338	27	211	0.0122386	0.123676	ssc:396927,ZP3,396927:up|ssc:396851,PIK3R5,396851:down|ssc:100153176,SFRP5,100153176:down|ssc:100153791,CYR61,100153791:down|ssc:100514958,SLAMF8,100514958:down|ssc:100145894,JTB,100145894:up|ssc:100152325,CHCHD10,100152325:up|ssc:100155895,ARRDC4,100155895:down|ssc:100525894,DUSP26,100525894:down|ssc:100113425,BMP4,100113425:down|ssc:397201,JAK2,397201:down|ssc:100169702,PROX1,100169702:down|ssc…	http://amigo.geneontology.org/cgi-bin/amigo/term_details?term=GO:0051338
regulation of mononuclear cell proliferation	Biological Process	GO:0032944	9	47	0.0123894	0.124762	ssc:396927,ZP3,396927:up|ssc:100516458,TNFSF18,100516458:down|ssc:100134969,NFATC2,100134969:down|ssc:397106,IL10,397106:down|ssc:100525094,SASH3,100525094:down|ssc:397271,AIF1,397271:down|ssc:100113425,BMP4,100113425:down|ssc:100038026,TNFSF13B,100038026:down|ssc:397441,CD86,397441:down	http://amigo.geneontology.org/cgi-bin/amigo/term_details?term=GO:0032944
regulation of lymphocyte proliferation	Biological Process	GO:0050670	9	47	0.0123894	0.124762	ssc:396927,ZP3,396927:up|ssc:100516458,TNFSF18,100516458:down|ssc:100134969,NFATC2,100134969:down|ssc:397106,IL10,397106:down|ssc:100525094,SASH3,100525094:down|ssc:397271,AIF1,397271:down|ssc:100113425,BMP4,100113425:down|ssc:100038026,TNFSF13B,100038026:down|ssc:397441,CD86,397441:down	http://amigo.geneontology.org/cgi-bin/amigo/term_details?term=GO:0050670
blood vessel endothelial cell migration	Biological Process	GO:0043534	5	18	0.0124537	0.124971	ssc:100522873,EPHA2,100522873:down|ssc:100155958,SRF,100155958:down|ssc:100516296,EGR3,100516296:down|ssc:100156280,GREM1,100156280:down|ssc:100511141,VASH1,100511141:down	http://amigo.geneontology.org/cgi-bin/amigo/term_details?term=GO:0043534
regulation of chemokine production	Biological Process	GO:0032642	5	18	0.0124537	0.124971	ssc:396900,AMCF-II,396900:down|ssc:100519703,F2RL1,100519703:down|ssc:397614,IL4R,397614:down|ssc:100517086,CSF1R,100517086:down|ssc:396623,TLR2,396623:down	http://amigo.geneontology.org/cgi-bin/amigo/term_details?term=GO:0032642
cell-substrate junction assembly	Biological Process	GO:0007044	4	12	0.0127893	0.12745	ssc:100155091,ITGA5,100155091:down|ssc:397620,FN1,397620:down|ssc:100156280,GREM1,100156280:down|ssc:397063,ITGB3,397063:down	http://amigo.geneontology.org/cgi-bin/amigo/term_details?term=GO:0007044
T cell mediated cytotoxicity	Biological Process	GO:0001913	4	12	0.0127893	0.12745	ssc:396969,CTSH,396969:down|ssc:100271930,IL7R,100271930:down|ssc:100522387,CTSC,100522387:up|ssc:100152253,STX11,100152253:down	http://amigo.geneontology.org/cgi-bin/amigo/term_details?term=GO:0001913
B cell receptor signaling pathway	Biological Process	GO:0050853	4	12	0.0127893	0.12745	ssc:100134969,NFATC2,100134969:down|ssc:100627864,LAT2,100627864:down|ssc:100627308,-,100627308:down|ssc:100517988,-,100517988:down	http://amigo.geneontology.org/cgi-bin/amigo/term_details?term=GO:0050853
pigment cell differentiation	Biological Process	GO:0050931	4	12	0.0127893	0.12745	ssc:654297,CITED1,654297:up|ssc:100520218,ADAMTS9,100520218:down|ssc:414911,EDNRB,414911:down|ssc:100049663,EDN3,100049663:up	http://amigo.geneontology.org/cgi-bin/amigo/term_details?term=GO:0050931
cell killing	Biological Process	GO:0001906	7	32	0.0129233	0.128119	ssc:396900,AMCF-II,396900:down|ssc:100519703,F2RL1,100519703:down|ssc:396969,CTSH,396969:down|ssc:100271930,IL7R,100271930:down|ssc:100621544,RNF19B,100621544:down|ssc:100522387,CTSC,100522387:up|ssc:100152253,STX11,100152253:down	http://amigo.geneontology.org/cgi-bin/amigo/term_details?term=GO:0001906
regulation of synaptic plasticity	Biological Process	GO:0048167	7	32	0.0129233	0.128119	ssc:397251,PLK2,397251:down|ssc:100155958,SRF,100155958:down|ssc:100512029,SYP,100512029:down|ssc:100623510,S100B,100623510:up|ssc:100524790,RGS14,100524790:down|ssc:100513228,BAIAP2,100513228:down|ssc:397495,BDNF,397495:down	http://amigo.geneontology.org/cgi-bin/amigo/term_details?term=GO:0048167
embryonic placenta development	Biological Process	GO:0001892	7	32	0.0129233	0.128119	ssc:100153791,CYR61,100153791:down|ssc:654297,CITED1,654297:up|ssc:100515339,KRT19,100515339:up|ssc:399503,LIF,399503:down|ssc:397106,IL10,397106:down|ssc:100152404,HEY2,100152404:down|ssc:100152077,KRT8,100152077:down	http://amigo.geneontology.org/cgi-bin/amigo/term_details?term=GO:0001892
positive regulation of programmed cell death	Biological Process	GO:0043068	19	135	0.0129797	0.128142	ssc:396628,VDR,396628:down|ssc:100127489,S100A9,100127489:down|ssc:100513283,APAF1,100513283:down|ssc:100525983,DCUN1D3,100525983:down|ssc:100522387,CTSC,100522387:up|ssc:100153033,STK17B,100153033:down|ssc:100153791,CYR61,100153791:down|ssc:100152038,OSM,100152038:down|ssc:100627352,FAM162A,100627352:up|ssc:100113425,BMP4,100113425:down|ssc:100519335,IFT57,100519335:up|ssc:100516027,SFRP2,100516…	http://amigo.geneontology.org/cgi-bin/amigo/term_details?term=GO:0043068
positive regulation of apoptotic process	Biological Process	GO:0043065	19	135	0.0129797	0.128142	ssc:396628,VDR,396628:down|ssc:100127489,S100A9,100127489:down|ssc:100513283,APAF1,100513283:down|ssc:100525983,DCUN1D3,100525983:down|ssc:100522387,CTSC,100522387:up|ssc:100153033,STK17B,100153033:down|ssc:100153791,CYR61,100153791:down|ssc:100152038,OSM,100152038:down|ssc:100627352,FAM162A,100627352:up|ssc:100113425,BMP4,100113425:down|ssc:100519335,IFT57,100519335:up|ssc:100516027,SFRP2,100516…	http://amigo.geneontology.org/cgi-bin/amigo/term_details?term=GO:0043065
peptidase activity	Molecular Function	GO:0008233	23	173	0.0129925	0.128142	ssc:397319,CASP1,397319:down|ssc:100621642,-,100621642:up|ssc:445538,XPNPEP2,445538:down|ssc:396985,PLAU,396985:down|ssc:397492,DPP4,397492:down|ssc:397320,MMP1,397320:down|ssc:100522387,CTSC,100522387:up|ssc:100520400,YOD1,100520400:down|ssc:100156168,PRSS35,100156168:down|ssc:100620361,-,100620361:down|ssc:397649,LTF,397649:up|ssc:397476,-,397476:up|ssc:100517601,RHBDF2,100517601:down|ssc:10051…	http://amigo.geneontology.org/cgi-bin/amigo/term_details?term=GO:0008233
integrin-mediated signaling pathway	Biological Process	GO:0007229	6	25	0.0133126	0.129741	ssc:396943,ITGB2,396943:down|ssc:100519746,DAB2,100519746:down|ssc:397405,TYROBP,397405:down|ssc:100155091,ITGA5,100155091:down|ssc:397406,FCER1G,397406:down|ssc:397063,ITGB3,397063:down	http://amigo.geneontology.org/cgi-bin/amigo/term_details?term=GO:0007229
cell-cell adhesion via plasma-membrane adhesion molecules	Biological Process	GO:0098742	6	25	0.0133126	0.129741	ssc:100623651,DSC2,100623651:down|ssc:100152548,CD164,100152548:up|ssc:100621027,CX3CL1,100621027:down|ssc:100155091,ITGA5,100155091:down|ssc:100512562,CDHR1,100512562:up|ssc:100520035,PCDH7,100520035:down	http://amigo.geneontology.org/cgi-bin/amigo/term_details?term=GO:0098742
regulation of BMP signaling pathway	Biological Process	GO:0030510	6	25	0.0133126	0.129741	ssc:100516027,SFRP2,100516027:down|ssc:100153791,CYR61,100153791:down|ssc:100521305,SMAD7,100521305:down|ssc:100127483,BMPR2,100127483:down|ssc:100113425,BMP4,100113425:down|ssc:100156280,GREM1,100156280:down	http://amigo.geneontology.org/cgi-bin/amigo/term_details?term=GO:0030510
positive regulation of protein import into nucleus	Biological Process	GO:0042307	6	25	0.0133126	0.129741	ssc:100516027,SFRP2,100516027:down|ssc:100521992,HCLS1,100521992:down|ssc:100519746,DAB2,100519746:down|ssc:100113425,BMP4,100113425:down|ssc:396623,TLR2,396623:down|ssc:100156280,GREM1,100156280:down	http://amigo.geneontology.org/cgi-bin/amigo/term_details?term=GO:0042307
amide biosynthetic process	Biological Process	GO:0043604	6	25	0.0133126	0.129741	ssc:100153791,CYR61,100153791:down|ssc:100156882,FURIN,100156882:down|ssc:100522018,GCLC,100522018:down|ssc:100624445,-,100624445:down|ssc:100518796,SGMS2,100518796:down|ssc:397115,-,397115:down	http://amigo.geneontology.org/cgi-bin/amigo/term_details?term=GO:0043604
cytokine binding	Molecular Function	GO:0019955	6	25	0.0133126	0.129741	ssc:100737352,ACKR2,100737352:down|ssc:414371,CCR5,414371:down|ssc:100037292,ACKR4,100037292:down|ssc:100517086,CSF1R,100517086:down|ssc:396665,-,396665:down|ssc:414374,CCR1,414374:down	http://amigo.geneontology.org/cgi-bin/amigo/term_details?term=GO:0019955
transmembrane receptor protein kinase activity	Molecular Function	GO:0019199	6	25	0.0133126	0.129741	ssc:100152462,ACVR1B,100152462:down|ssc:100522873,EPHA2,100522873:down|ssc:100127483,BMPR2,100127483:down|ssc:397311,KDR,397311:down|ssc:100517086,CSF1R,100517086:down|ssc:396665,-,396665:down	http://amigo.geneontology.org/cgi-bin/amigo/term_details?term=GO:0019199
regulation of protein localization	Biological Process	GO:0032880	22	164	0.0135306	0.131643	ssc:399541,TLR4,399541:down|ssc:100522873,EPHA2,100522873:down|ssc:100515612,C5AR2,100515612:down|ssc:100153176,SFRP5,100153176:down|ssc:100516668,RABGEF1,100516668:down|ssc:100514142,GCK,100514142:up|ssc:100521992,HCLS1,100521992:down|ssc:399503,LIF,399503:down|ssc:100113425,BMP4,100113425:down|ssc:100627019,ABL2,100627019:down|ssc:100516027,SFRP2,100516027:down|ssc:100738470,NDUFAF2,100738470:u…	http://amigo.geneontology.org/cgi-bin/amigo/term_details?term=GO:0032880
single-organism metabolic process	Biological Process	GO:0044710	129	1331	0.0136249	0.132336	ssc:100270814,-,100270814:down|ssc:100286778,PDK4,100286778:down|ssc:100155399,PNLIPRP1,100155399:up|ssc:397122,IL1B1,397122:down|ssc:396851,PIK3R5,396851:down|ssc:100153460,AKAP5,100153460:down|ssc:100621675,-,100621675:down|ssc:396665,-,396665:down|ssc:100516143,MBIP,100516143:up|ssc:100037287,DDO,100037287:up|ssc:100623848,EXTL1,100623848:up|ssc:100523472,DUSP19,100523472:up|ssc:100155367,RAP2…	http://amigo.geneontology.org/cgi-bin/amigo/term_details?term=GO:0044710
negative regulation of programmed cell death	Biological Process	GO:0043069	26	203	0.0136514	0.132371	ssc:100286778,PDK4,100286778:down|ssc:100621027,CX3CL1,100621027:down|ssc:100152404,HEY2,100152404:down|ssc:397495,BDNF,397495:down|ssc:100153791,CYR61,100153791:down|ssc:100156860,BCL2A1,100156860:down|ssc:100519286,SERPINB2,100519286:down|ssc:100521992,HCLS1,100521992:down|ssc:100516296,EGR3,100516296:down|ssc:100113425,BMP4,100113425:down|ssc:100627019,ABL2,100627019:down|ssc:100518125,YBX3,10…	http://amigo.geneontology.org/cgi-bin/amigo/term_details?term=GO:0043069
response to acid chemical	Biological Process	GO:0001101	8	40	0.0139145	0.134468	ssc:100127164,PTGER2,100127164:down|ssc:100620759,-,100620759:up|ssc:100286778,PDK4,100286778:down|ssc:396969,CTSH,396969:down|ssc:100524418,PTGDR,100524418:down|ssc:100525560,CDKN2D,100525560:up|ssc:100153960,NR1H4,100153960:up|ssc:100627019,ABL2,100627019:down	http://amigo.geneontology.org/cgi-bin/amigo/term_details?term=GO:0001101
positive regulation of peptidase activity	Biological Process	GO:0010952	8	40	0.0139145	0.134468	ssc:100516027,SFRP2,100516027:down|ssc:100127489,S100A9,100127489:down|ssc:100513283,APAF1,100513283:down|ssc:100153791,CYR61,100153791:down|ssc:396969,CTSH,396969:down|ssc:100627352,FAM162A,100627352:up|ssc:100519335,IFT57,100519335:up|ssc:397620,FN1,397620:down	http://amigo.geneontology.org/cgi-bin/amigo/term_details?term=GO:0010952
regulation of proteolysis	Biological Process	GO:0030162	24	184	0.0141333	0.136353	ssc:100512873,-,100512873:down|ssc:100127489,S100A9,100127489:down|ssc:100513283,APAF1,100513283:down|ssc:100153791,CYR61,100153791:down|ssc:100519286,SERPINB2,100519286:down|ssc:100627352,FAM162A,100627352:up|ssc:397620,FN1,397620:down|ssc:100622572,-,100622572:down|ssc:100519335,IFT57,100519335:up|ssc:100516027,SFRP2,100516027:down|ssc:100620511,CLEC3B,100620511:up|ssc:100519746,DAB2,100519746:…	http://amigo.geneontology.org/cgi-bin/amigo/term_details?term=GO:0030162
response to vitamin	Biological Process	GO:0033273	3	7	0.0147529	0.139064	ssc:100525560,CDKN2D,100525560:up|ssc:396628,VDR,396628:down|ssc:397087,SPP1,397087:down	http://amigo.geneontology.org/cgi-bin/amigo/term_details?term=GO:0033273
integrin complex	Cellular Component	GO:0008305	3	7	0.0147529	0.139064	ssc:396943,ITGB2,396943:down|ssc:100155091,ITGA5,100155091:down|ssc:397063,ITGB3,397063:down	http://amigo.geneontology.org/cgi-bin/amigo/term_details?term=GO:0008305
transforming growth factor beta-activated receptor activity	Molecular Function	GO:0005024	3	7	0.0147529	0.139064	ssc:100152462,ACVR1B,100152462:down|ssc:100127483,BMPR2,100127483:down|ssc:396665,-,396665:down	http://amigo.geneontology.org/cgi-bin/amigo/term_details?term=GO:0005024
protein complex involved in cell adhesion	Cellular Component	GO:0098636	3	7	0.0147529	0.139064	ssc:396943,ITGB2,396943:down|ssc:100155091,ITGA5,100155091:down|ssc:397063,ITGB3,397063:down	http://amigo.geneontology.org/cgi-bin/amigo/term_details?term=GO:0098636
lens morphogenesis in camera-type eye	Biological Process	GO:0002089	3	7	0.0147529	0.139064	ssc:100522873,EPHA2,100522873:down|ssc:100113425,BMP4,100113425:down|ssc:100169702,PROX1,100169702:down	http://amigo.geneontology.org/cgi-bin/amigo/term_details?term=GO:0002089
antigen processing and presentation of exogenous peptide antigen	Biological Process	GO:0002478	3	7	0.0147529	0.139064	ssc:445528,HLA-DMA,445528:down|ssc:100174943,IFI30,100174943:down|ssc:397406,FCER1G,397406:down	http://amigo.geneontology.org/cgi-bin/amigo/term_details?term=GO:0002478
MHC protein complex	Cellular Component	GO:0042611	3	7	0.0147529	0.139064	ssc:445528,HLA-DMA,445528:down|ssc:100135050,SLA-DMB,100135050:down|ssc:100037921,SLA-DQB1,100037921:down	http://amigo.geneontology.org/cgi-bin/amigo/term_details?term=GO:0042611
multivesicular body	Cellular Component	GO:0005771	3	7	0.0147529	0.139064	ssc:396846,ZP2,396846:up|ssc:396927,ZP3,396927:up|ssc:445528,HLA-DMA,445528:down	http://amigo.geneontology.org/cgi-bin/amigo/term_details?term=GO:0005771
transmembrane receptor protein serine/threonine kinase activity	Molecular Function	GO:0004675	3	7	0.0147529	0.139064	ssc:100152462,ACVR1B,100152462:down|ssc:100127483,BMPR2,100127483:down|ssc:396665,-,396665:down	http://amigo.geneontology.org/cgi-bin/amigo/term_details?term=GO:0004675
carbohydrate kinase activity	Molecular Function	GO:0019200	3	7	0.0147529	0.139064	ssc:100514142,GCK,100514142:up|ssc:494561,HK2,494561:down|ssc:100522855,HK3,100522855:down	http://amigo.geneontology.org/cgi-bin/amigo/term_details?term=GO:0019200
metanephric renal vesicle morphogenesis	Biological Process	GO:0072283	3	7	0.0147529	0.139064	ssc:399503,LIF,399503:down|ssc:100113425,BMP4,100113425:down|ssc:100156280,GREM1,100156280:down	http://amigo.geneontology.org/cgi-bin/amigo/term_details?term=GO:0072283
positive regulation of erythrocyte differentiation	Biological Process	GO:0045648	3	7	0.0147529	0.139064	ssc:397093,INHBA,397093:down|ssc:100152462,ACVR1B,100152462:down|ssc:654298,ID2,654298:down	http://amigo.geneontology.org/cgi-bin/amigo/term_details?term=GO:0045648
response to vitamin D	Biological Process	GO:0033280	3	7	0.0147529	0.139064	ssc:100525560,CDKN2D,100525560:up|ssc:396628,VDR,396628:down|ssc:397087,SPP1,397087:down	http://amigo.geneontology.org/cgi-bin/amigo/term_details?term=GO:0033280
carbohydrate phosphorylation	Biological Process	GO:0046835	3	7	0.0147529	0.139064	ssc:100514142,GCK,100514142:up|ssc:494561,HK2,494561:down|ssc:100522855,HK3,100522855:down	http://amigo.geneontology.org/cgi-bin/amigo/term_details?term=GO:0046835
angiogenesis	Biological Process	GO:0001525	16	109	0.0148746	0.139904	ssc:100522873,EPHA2,100522873:down|ssc:100621027,CX3CL1,100621027:down|ssc:100511141,VASH1,100511141:down|ssc:100153791,CYR61,100153791:down|ssc:100155958,SRF,100155958:down|ssc:100622445,ELK3,100622445:down|ssc:100516296,EGR3,100516296:down|ssc:100113425,BMP4,100113425:down|ssc:397497,FGF1,397497:down|ssc:397063,ITGB3,397063:down|ssc:100516027,SFRP2,100516027:down|ssc:100156280,GREM1,100156280:d…	http://amigo.geneontology.org/cgi-bin/amigo/term_details?term=GO:0001525
negative regulation of nucleobase-containing compound metabolic process	Biological Process	GO:0045934	38	326	0.0148907	0.139904	ssc:396927,ZP3,396927:up|ssc:396951,PTHLH,396951:up|ssc:396628,VDR,396628:down|ssc:100152404,HEY2,100152404:down|ssc:100625349,MXD1,100625349:down|ssc:100153176,SFRP5,100153176:down|ssc:100515035,GMNN,100515035:up|ssc:780421,CMKLR1,780421:down|ssc:100521992,HCLS1,100521992:down|ssc:100153960,NR1H4,100153960:up|ssc:100518125,YBX3,100518125:up|ssc:654298,ID2,654298:down|ssc:100156280,GREM1,10015628…	http://amigo.geneontology.org/cgi-bin/amigo/term_details?term=GO:0045934
regulation of primary metabolic process	Biological Process	GO:0080090	131	1358	0.0149702	0.140397	ssc:100270814,-,100270814:down|ssc:100286778,PDK4,100286778:down|ssc:397122,IL1B1,397122:down|ssc:396851,PIK3R5,396851:down|ssc:100152404,HEY2,100152404:down|ssc:100153460,AKAP5,100153460:down|ssc:396665,-,396665:down|ssc:100145894,JTB,100145894:up|ssc:780421,CMKLR1,780421:down|ssc:100144523,PMEPA1,100144523:down|ssc:397620,FN1,397620:down|ssc:100519335,IFT57,100519335:up|ssc:100154994,SERPINB10,…	http://amigo.geneontology.org/cgi-bin/amigo/term_details?term=GO:0080090
protein complex binding	Molecular Function	GO:0032403	24	185	0.0150402	0.140397	ssc:396851,PIK3R5,396851:down|ssc:100127489,S100A9,100127489:down|ssc:100154607,S1PR3,100154607:down|ssc:100048958,GNA14,100048958:down|ssc:100153791,CYR61,100153791:down|ssc:100521992,HCLS1,100521992:down|ssc:445528,HLA-DMA,445528:down|ssc:397620,FN1,397620:down|ssc:100520585,FMNL1,100520585:down|ssc:397063,ITGB3,397063:down|ssc:100154395,NOV,100154395:down|ssc:100519746,DAB2,100519746:down|ssc:…	http://amigo.geneontology.org/cgi-bin/amigo/term_details?term=GO:0032403
positive regulation of cell death	Biological Process	GO:0010942	19	137	0.0150452	0.140397	ssc:396628,VDR,396628:down|ssc:100127489,S100A9,100127489:down|ssc:100513283,APAF1,100513283:down|ssc:100525983,DCUN1D3,100525983:down|ssc:100522387,CTSC,100522387:up|ssc:100153033,STK17B,100153033:down|ssc:100153791,CYR61,100153791:down|ssc:100152038,OSM,100152038:down|ssc:100627352,FAM162A,100627352:up|ssc:100113425,BMP4,100113425:down|ssc:100519335,IFT57,100519335:up|ssc:100516027,SFRP2,100516…	http://amigo.geneontology.org/cgi-bin/amigo/term_details?term=GO:0010942
cell-substrate adhesion	Biological Process	GO:0031589	11	65	0.0150896	0.140397	ssc:100519746,DAB2,100519746:down|ssc:100155091,ITGA5,100155091:down|ssc:100621675,-,100621675:down|ssc:100156280,GREM1,100156280:down|ssc:397087,SPP1,397087:down|ssc:100153791,CYR61,100153791:down|ssc:396943,ITGB2,396943:down|ssc:100155958,SRF,100155958:down|ssc:100738241,BCAM,100738241:down|ssc:397620,FN1,397620:down|ssc:397063,ITGB3,397063:down	http://amigo.geneontology.org/cgi-bin/amigo/term_details?term=GO:0031589
mononuclear cell proliferation	Biological Process	GO:0032943	11	65	0.0150896	0.140397	ssc:396927,ZP3,396927:up|ssc:100516458,TNFSF18,100516458:down|ssc:100134969,NFATC2,100134969:down|ssc:100522131,FKBP1B,100522131:down|ssc:397106,IL10,397106:down|ssc:100525094,SASH3,100525094:down|ssc:397271,AIF1,397271:down|ssc:100113425,BMP4,100113425:down|ssc:100038026,TNFSF13B,100038026:down|ssc:100271930,IL7R,100271930:down|ssc:397441,CD86,397441:down	http://amigo.geneontology.org/cgi-bin/amigo/term_details?term=GO:0032943
lymphocyte proliferation	Biological Process	GO:0046651	11	65	0.0150896	0.140397	ssc:396927,ZP3,396927:up|ssc:100516458,TNFSF18,100516458:down|ssc:100134969,NFATC2,100134969:down|ssc:100522131,FKBP1B,100522131:down|ssc:397106,IL10,397106:down|ssc:100525094,SASH3,100525094:down|ssc:397271,AIF1,397271:down|ssc:100113425,BMP4,100113425:down|ssc:100038026,TNFSF13B,100038026:down|ssc:100271930,IL7R,100271930:down|ssc:397441,CD86,397441:down	http://amigo.geneontology.org/cgi-bin/amigo/term_details?term=GO:0046651
regulation of epithelial cell differentiation	Biological Process	GO:0030856	7	33	0.015283	0.141509	ssc:100152419,FRZB,100152419:up|ssc:399503,LIF,399503:down|ssc:396628,VDR,396628:down|ssc:100520218,ADAMTS9,100520218:down|ssc:100113425,BMP4,100113425:down|ssc:100152404,HEY2,100152404:down|ssc:100154607,S1PR3,100154607:down	http://amigo.geneontology.org/cgi-bin/amigo/term_details?term=GO:0030856
regulation of epithelial cell migration	Biological Process	GO:0010632	7	33	0.015283	0.141509	ssc:397564,HBEGF,397564:down|ssc:100522873,EPHA2,100522873:down|ssc:396969,CTSH,396969:down|ssc:100127483,BMPR2,100127483:down|ssc:100113425,BMP4,100113425:down|ssc:100169702,PROX1,100169702:down|ssc:100511141,VASH1,100511141:down	http://amigo.geneontology.org/cgi-bin/amigo/term_details?term=GO:0010632
positive regulation of vasculature development	Biological Process	GO:1904018	7	33	0.015283	0.141509	ssc:100516027,SFRP2,100516027:down|ssc:397094,IL1A,397094:down|ssc:396969,CTSH,396969:down|ssc:100621027,CX3CL1,100621027:down|ssc:397497,FGF1,397497:down|ssc:396865,CHI3L1,396865:down|ssc:100156280,GREM1,100156280:down	http://amigo.geneontology.org/cgi-bin/amigo/term_details?term=GO:1904018
phosphotransferase activity, alcohol group as acceptor	Molecular Function	GO:0016773	26	205	0.0153614	0.142007	ssc:100126293,CASS4,100126293:down|ssc:100286778,PDK4,100286778:down|ssc:100522873,EPHA2,100522873:down|ssc:100627308,-,100627308:down|ssc:100127483,BMPR2,100127483:down|ssc:100156359,LIMK2,100156359:down|ssc:100522855,HK3,100522855:down|ssc:396665,-,396665:down|ssc:100523692,KCNH4,100523692:down|ssc:100153033,STK17B,100153033:down|ssc:100514142,GCK,100514142:up|ssc:100521487,WEE1,100521487:down|…	http://amigo.geneontology.org/cgi-bin/amigo/term_details?term=GO:0016773
kinase activity	Molecular Function	GO:0016301	29	235	0.0154715	0.142642	ssc:100126293,CASS4,100126293:down|ssc:100286778,PDK4,100286778:down|ssc:100522873,EPHA2,100522873:down|ssc:100627308,-,100627308:down|ssc:100523990,FN3K,100523990:up|ssc:100127483,BMPR2,100127483:down|ssc:100156359,LIMK2,100156359:down|ssc:397264,CKM,397264:down|ssc:100522855,HK3,100522855:down|ssc:396665,-,396665:down|ssc:100523692,KCNH4,100523692:down|ssc:100153033,STK17B,100153033:down|ssc:10…	http://amigo.geneontology.org/cgi-bin/amigo/term_details?term=GO:0016301
actin cytoskeleton organization	Biological Process	GO:0030036	18	128	0.0154797	0.142642	ssc:100127489,S100A9,100127489:down|ssc:100621675,-,100621675:down|ssc:100522109,ELMO1,100522109:down|ssc:100155958,SRF,100155958:down|ssc:100521992,HCLS1,100521992:down|ssc:100169702,PROX1,100169702:down|ssc:100627019,ABL2,100627019:down|ssc:100520585,FMNL1,100520585:down|ssc:100515339,KRT19,100515339:up|ssc:100155631,FES,100155631:down|ssc:100517086,CSF1R,100517086:down|ssc:100519703,F2RL1,1005…	http://amigo.geneontology.org/cgi-bin/amigo/term_details?term=GO:0030036
adaptive immune response based on somatic recombination of immune receptors built from immunoglobulin superfamily domains	Biological Process	GO:0002460	10	57	0.015764	0.144147	ssc:396927,ZP3,396927:up|ssc:100522387,CTSC,100522387:up|ssc:100152253,STX11,100152253:down|ssc:445528,HLA-DMA,445528:down|ssc:396969,CTSH,396969:down|ssc:397614,IL4R,397614:down|ssc:100525094,SASH3,100525094:down|ssc:100038026,TNFSF13B,100038026:down|ssc:100271930,IL7R,100271930:down|ssc:397406,FCER1G,397406:down	http://amigo.geneontology.org/cgi-bin/amigo/term_details?term=GO:0002460
artery morphogenesis	Biological Process	GO:0048844	5	19	0.0157935	0.144147	ssc:100521305,SMAD7,100521305:down|ssc:100155958,SRF,100155958:down|ssc:100113425,BMP4,100113425:down|ssc:100169702,PROX1,100169702:down|ssc:100152404,HEY2,100152404:down	http://amigo.geneontology.org/cgi-bin/amigo/term_details?term=GO:0048844
tyrosine phosphorylation of STAT protein	Biological Process	GO:0007260	5	19	0.0157935	0.144147	ssc:100521992,HCLS1,100521992:down|ssc:100152038,OSM,100152038:down|ssc:399503,LIF,399503:down|ssc:397201,JAK2,397201:down|ssc:100517086,CSF1R,100517086:down	http://amigo.geneontology.org/cgi-bin/amigo/term_details?term=GO:0007260
negative regulation of DNA binding	Biological Process	GO:0043392	5	19	0.0157935	0.144147	ssc:100512012,WFIKKN2,100512012:up|ssc:100522839,ID1,100522839:up|ssc:654298,ID2,654298:down|ssc:100152404,HEY2,100152404:down|ssc:100155995,NFIB,100155995:up	http://amigo.geneontology.org/cgi-bin/amigo/term_details?term=GO:0043392
positive regulation of JAK-STAT cascade	Biological Process	GO:0046427	5	19	0.0157935	0.144147	ssc:100521992,HCLS1,100521992:down|ssc:399503,LIF,399503:down|ssc:397106,IL10,397106:down|ssc:397201,JAK2,397201:down|ssc:100517086,CSF1R,100517086:down	http://amigo.geneontology.org/cgi-bin/amigo/term_details?term=GO:0046427
mammary gland morphogenesis	Biological Process	GO:0060443	5	19	0.0157935	0.144147	ssc:100516960,SLC12A2,100516960:down|ssc:100522873,EPHA2,100522873:down|ssc:396951,PTHLH,396951:up|ssc:396628,VDR,396628:down|ssc:100113425,BMP4,100113425:down	http://amigo.geneontology.org/cgi-bin/amigo/term_details?term=GO:0060443
BMP signaling pathway	Biological Process	GO:0030509	8	41	0.0160926	0.144957	ssc:100516027,SFRP2,100516027:down|ssc:100127483,BMPR2,100127483:down|ssc:100156280,GREM1,100156280:down|ssc:100517990,ZCCHC12,100517990:down|ssc:100521305,SMAD7,100521305:down|ssc:100153791,CYR61,100153791:down|ssc:100522839,ID1,100522839:up|ssc:100113425,BMP4,100113425:down	http://amigo.geneontology.org/cgi-bin/amigo/term_details?term=GO:0030509
positive regulation of immune effector process	Biological Process	GO:0002699	8	41	0.0160926	0.144957	ssc:396927,ZP3,396927:up|ssc:100155631,FES,100155631:down|ssc:100516668,RABGEF1,100516668:down|ssc:397614,IL4R,397614:down|ssc:100519703,F2RL1,100519703:down|ssc:100525094,SASH3,100525094:down|ssc:397406,FCER1G,397406:down|ssc:396623,TLR2,396623:down	http://amigo.geneontology.org/cgi-bin/amigo/term_details?term=GO:0002699
regulation of blood vessel size	Biological Process	GO:0050880	8	41	0.0160926	0.144957	ssc:396724,OLR1,396724:down|ssc:100127483,BMPR2,100127483:down|ssc:733670,RGS2,733670:up|ssc:100049663,EDN3,100049663:up|ssc:100522018,GCLC,100522018:down|ssc:100519703,F2RL1,100519703:down|ssc:396915,EDN1,396915:down|ssc:414911,EDNRB,414911:down	http://amigo.geneontology.org/cgi-bin/amigo/term_details?term=GO:0050880
regulation of tube size	Biological Process	GO:0035150	8	41	0.0160926	0.144957	ssc:396724,OLR1,396724:down|ssc:100127483,BMPR2,100127483:down|ssc:733670,RGS2,733670:up|ssc:100049663,EDN3,100049663:up|ssc:100522018,GCLC,100522018:down|ssc:100519703,F2RL1,100519703:down|ssc:396915,EDN1,396915:down|ssc:414911,EDNRB,414911:down	http://amigo.geneontology.org/cgi-bin/amigo/term_details?term=GO:0035150
negative regulation of secretion	Biological Process	GO:0051048	8	41	0.0160926	0.144957	ssc:100738470,NDUFAF2,100738470:up|ssc:100515612,C5AR2,100515612:down|ssc:100516668,RABGEF1,100516668:down|ssc:100522131,FKBP1B,100522131:down|ssc:399503,LIF,399503:down|ssc:100152038,OSM,100152038:down|ssc:100519703,F2RL1,100519703:down|ssc:397106,IL10,397106:down	http://amigo.geneontology.org/cgi-bin/amigo/term_details?term=GO:0051048
immune effector process	Biological Process	GO:0002252	21	157	0.0160979	0.144957	ssc:396900,AMCF-II,396900:down|ssc:396927,ZP3,396927:up|ssc:100516458,TNFSF18,100516458:down|ssc:100522387,CTSC,100522387:up|ssc:100524561,PPBP,100524561:down|ssc:100516668,RABGEF1,100516668:down|ssc:445528,HLA-DMA,445528:down|ssc:100525094,SASH3,100525094:down|ssc:100155631,FES,100155631:down|ssc:100511161,PLA2G3,100511161:down|ssc:100152253,STX11,100152253:down|ssc:396969,CTSH,396969:down|ssc:3…	http://amigo.geneontology.org/cgi-bin/amigo/term_details?term=GO:0002252
cellular response to acid chemical	Biological Process	GO:0071229	6	26	0.0161455	0.144957	ssc:100127164,PTGER2,100127164:down|ssc:100620759,-,100620759:up|ssc:100286778,PDK4,100286778:down|ssc:100524418,PTGDR,100524418:down|ssc:100153960,NR1H4,100153960:up|ssc:100627019,ABL2,100627019:down	http://amigo.geneontology.org/cgi-bin/amigo/term_details?term=GO:0071229
chondrocyte differentiation	Biological Process	GO:0002062	6	26	0.0161455	0.144957	ssc:100516027,SFRP2,100516027:down|ssc:100524615,ARID5A,100524615:down|ssc:396951,PTHLH,396951:up|ssc:100127483,BMPR2,100127483:down|ssc:100113425,BMP4,100113425:down|ssc:100155995,NFIB,100155995:up	http://amigo.geneontology.org/cgi-bin/amigo/term_details?term=GO:0002062
positive regulation of nucleocytoplasmic transport	Biological Process	GO:0046824	6	26	0.0161455	0.144957	ssc:100516027,SFRP2,100516027:down|ssc:100521992,HCLS1,100521992:down|ssc:100519746,DAB2,100519746:down|ssc:100113425,BMP4,100113425:down|ssc:396623,TLR2,396623:down|ssc:100156280,GREM1,100156280:down	http://amigo.geneontology.org/cgi-bin/amigo/term_details?term=GO:0046824
regulation of glucose metabolic process	Biological Process	GO:0010906	6	26	0.0161455	0.144957	ssc:100515931,PPP1R3B,100515931:down|ssc:100270814,-,100270814:down|ssc:100286778,PDK4,100286778:down|ssc:100514142,GCK,100514142:up|ssc:397038,FBP1,397038:down|ssc:100522260,PPP1R3G,100522260:up	http://amigo.geneontology.org/cgi-bin/amigo/term_details?term=GO:0010906
positive regulation of neuron differentiation	Biological Process	GO:0045666	9	49	0.0161596	0.144957	ssc:100155631,FES,100155631:down|ssc:100622059,KCTD11,100622059:down|ssc:100127483,BMPR2,100127483:down|ssc:397495,BDNF,397495:down|ssc:100155958,SRF,100155958:down|ssc:100113425,BMP4,100113425:down|ssc:100169702,PROX1,100169702:down|ssc:397620,FN1,397620:down|ssc:100627019,ABL2,100627019:down	http://amigo.geneontology.org/cgi-bin/amigo/term_details?term=GO:0045666
positive regulation of cytokine production	Biological Process	GO:0001819	13	83	0.0162006	0.145099	ssc:100627693,RAB7B,100627693:down|ssc:396927,ZP3,396927:up|ssc:100621027,CX3CL1,100621027:down|ssc:100517086,CSF1R,100517086:down|ssc:397614,IL4R,397614:down|ssc:397094,IL1A,397094:down|ssc:100519703,F2RL1,100519703:down|ssc:397106,IL10,397106:down|ssc:100525094,SASH3,100525094:down|ssc:100620216,-,100620216:down|ssc:397406,FCER1G,397406:down|ssc:396623,TLR2,396623:down|ssc:100627019,ABL2,100627…	http://amigo.geneontology.org/cgi-bin/amigo/term_details?term=GO:0001819
negative regulation of protein metabolic process	Biological Process	GO:0051248	30	246	0.016266	0.145458	ssc:100512873,-,100512873:down|ssc:100523837,PRR5L,100523837:down|ssc:100517189,CTDSPL,100517189:up|ssc:100153176,SFRP5,100153176:down|ssc:100516668,RABGEF1,100516668:down|ssc:100519286,SERPINB2,100519286:down|ssc:399503,LIF,399503:down|ssc:100144523,PMEPA1,100144523:down|ssc:100625570,C3orf33,100625570:up|ssc:100525894,DUSP26,100525894:down|ssc:100113425,BMP4,100113425:down|ssc:100622572,-,10062…	http://amigo.geneontology.org/cgi-bin/amigo/term_details?term=GO:0051248
isomerase activity	Molecular Function	GO:0016853	11	66	0.0168233	0.149743	ssc:100524473,PIN4,100524473:up|ssc:100038014,RPIA,100038014:down|ssc:100312968,EBP,100312968:up|ssc:397112,TBXAS1,397112:down|ssc:100739304,-,100739304:up|ssc:100152612,-,100152612:down|ssc:100154444,GLCE,100154444:down|ssc:100522131,FKBP1B,100522131:down|ssc:100620325,-,100620325:down|ssc:100625332,-,100625332:down|ssc:780405,APOA1BP,780405:up	http://amigo.geneontology.org/cgi-bin/amigo/term_details?term=GO:0016853
G-protein coupled peptide receptor activity	Molecular Function	GO:0008528	11	66	0.0168233	0.149743	ssc:414375,XCR1,414375:down|ssc:100515612,C5AR2,100515612:down|ssc:414374,CCR1,414374:down|ssc:414372,CCR2,414372:down|ssc:780421,CMKLR1,780421:down|ssc:100737352,ACKR2,100737352:down|ssc:100519703,F2RL1,100519703:down|ssc:414371,CCR5,414371:down|ssc:397547,NPY1R,397547:up|ssc:100037292,ACKR4,100037292:down|ssc:414911,EDNRB,414911:down	http://amigo.geneontology.org/cgi-bin/amigo/term_details?term=GO:0008528
peptide receptor activity	Molecular Function	GO:0001653	11	66	0.0168233	0.149743	ssc:414375,XCR1,414375:down|ssc:100515612,C5AR2,100515612:down|ssc:414374,CCR1,414374:down|ssc:414372,CCR2,414372:down|ssc:780421,CMKLR1,780421:down|ssc:100737352,ACKR2,100737352:down|ssc:100519703,F2RL1,100519703:down|ssc:414371,CCR5,414371:down|ssc:397547,NPY1R,397547:up|ssc:100037292,ACKR4,100037292:down|ssc:414911,EDNRB,414911:down	http://amigo.geneontology.org/cgi-bin/amigo/term_details?term=GO:0001653
regulation of cell development	Biological Process	GO:0060284	24	187	0.0169927	0.151017	ssc:100622059,KCTD11,100622059:down|ssc:396628,VDR,396628:down|ssc:100127483,BMPR2,100127483:down|ssc:100152404,HEY2,100152404:down|ssc:100154607,S1PR3,100154607:down|ssc:396665,-,396665:down|ssc:397495,BDNF,397495:down|ssc:399503,LIF,399503:down|ssc:100155958,SRF,100155958:down|ssc:100113425,BMP4,100113425:down|ssc:100169702,PROX1,100169702:down|ssc:397620,FN1,397620:down|ssc:100627019,ABL2,1006…	http://amigo.geneontology.org/cgi-bin/amigo/term_details?term=GO:0060284
regulation of macromolecule metabolic process	Biological Process	GO:0060255	133	1387	0.0171711	0.151429	ssc:100270814,-,100270814:down|ssc:397122,IL1B1,397122:down|ssc:396851,PIK3R5,396851:down|ssc:100152404,HEY2,100152404:down|ssc:396665,-,396665:down|ssc:100145894,JTB,100145894:up|ssc:780421,CMKLR1,780421:down|ssc:100144523,PMEPA1,100144523:down|ssc:397620,FN1,397620:down|ssc:100519335,IFT57,100519335:up|ssc:100154994,SERPINB10,100154994:down|ssc:100522360,-,100522360:down|ssc:100155795,MYLIP,100…	http://amigo.geneontology.org/cgi-bin/amigo/term_details?term=GO:0060255
digestive tract morphogenesis	Biological Process	GO:0048546	4	13	0.0173037	0.151429	ssc:100516027,SFRP2,100516027:down|ssc:654298,ID2,654298:down|ssc:100113425,BMP4,100113425:down|ssc:100153176,SFRP5,100153176:down	http://amigo.geneontology.org/cgi-bin/amigo/term_details?term=GO:0048546
regulation of B cell proliferation	Biological Process	GO:0030888	4	13	0.0173037	0.151429	ssc:100134969,NFATC2,100134969:down|ssc:397106,IL10,397106:down|ssc:100525094,SASH3,100525094:down|ssc:100038026,TNFSF13B,100038026:down	http://amigo.geneontology.org/cgi-bin/amigo/term_details?term=GO:0030888
ventricular septum morphogenesis	Biological Process	GO:0060412	4	13	0.0173037	0.151429	ssc:100521305,SMAD7,100521305:down|ssc:654298,ID2,654298:down|ssc:100169702,PROX1,100169702:down|ssc:100152404,HEY2,100152404:down	http://amigo.geneontology.org/cgi-bin/amigo/term_details?term=GO:0060412
mammary gland duct morphogenesis	Biological Process	GO:0060603	4	13	0.0173037	0.151429	ssc:100516960,SLC12A2,100516960:down|ssc:100522873,EPHA2,100522873:down|ssc:396951,PTHLH,396951:up|ssc:396628,VDR,396628:down	http://amigo.geneontology.org/cgi-bin/amigo/term_details?term=GO:0060603
regulation of pH	Biological Process	GO:0006885	4	13	0.0173037	0.151429	ssc:100514958,SLAMF8,100514958:down|ssc:100286778,PDK4,100286778:down|ssc:397458,SLC9A1,397458:down|ssc:414911,EDNRB,414911:down	http://amigo.geneontology.org/cgi-bin/amigo/term_details?term=GO:0006885
regulation of toll-like receptor signaling pathway	Biological Process	GO:0034121	4	13	0.0173037	0.151429	ssc:100627693,RAB7B,100627693:down|ssc:100519703,F2RL1,100519703:down|ssc:396623,TLR2,396623:down|ssc:100154350,NFKBIL1,100154350:up	http://amigo.geneontology.org/cgi-bin/amigo/term_details?term=GO:0034121
hormone binding	Molecular Function	GO:0042562	4	13	0.0173037	0.151429	ssc:100525333,CRYM,100525333:up|ssc:396969,CTSH,396969:down|ssc:100518141,C2CD2L,100518141:down|ssc:414911,EDNRB,414911:down	http://amigo.geneontology.org/cgi-bin/amigo/term_details?term=GO:0042562
cholesterol biosynthetic process	Biological Process	GO:0006695	4	13	0.0173037	0.151429	ssc:494015,SCAP,494015:up|ssc:397497,FGF1,397497:down|ssc:100144446,HMGCR,100144446:up|ssc:100152963,PEX2,100152963:up	http://amigo.geneontology.org/cgi-bin/amigo/term_details?term=GO:0006695
regulation of alcohol biosynthetic process	Biological Process	GO:1902930	4	13	0.0173037	0.151429	ssc:494015,SCAP,494015:up|ssc:396628,VDR,396628:down|ssc:397497,FGF1,397497:down|ssc:100152963,PEX2,100152963:up	http://amigo.geneontology.org/cgi-bin/amigo/term_details?term=GO:1902930
negative regulation of transcription, DNA-templated	Biological Process	GO:0045892	34	288	0.0173287	0.151429	ssc:396927,ZP3,396927:up|ssc:396951,PTHLH,396951:up|ssc:396628,VDR,396628:down|ssc:100152404,HEY2,100152404:down|ssc:100625349,MXD1,100625349:down|ssc:100153176,SFRP5,100153176:down|ssc:100515035,GMNN,100515035:up|ssc:780421,CMKLR1,780421:down|ssc:100521992,HCLS1,100521992:down|ssc:100153960,NR1H4,100153960:up|ssc:100518125,YBX3,100518125:up|ssc:654298,ID2,654298:down|ssc:100156280,GREM1,10015628…	http://amigo.geneontology.org/cgi-bin/amigo/term_details?term=GO:0045892
regulation of cell growth	Biological Process	GO:0001558	12	75	0.0174691	0.152424	ssc:100516027,SFRP2,100516027:down|ssc:100154395,NOV,100154395:down|ssc:397093,INHBA,397093:down|ssc:100152419,FRZB,100152419:up|ssc:100127483,BMPR2,100127483:down|ssc:100525983,DCUN1D3,100525983:down|ssc:100153791,CYR61,100153791:down|ssc:100152462,ACVR1B,100152462:down|ssc:100155958,SRF,100155958:down|ssc:100525560,CDKN2D,100525560:up|ssc:397620,FN1,397620:down|ssc:397038,FBP1,397038:down	http://amigo.geneontology.org/cgi-bin/amigo/term_details?term=GO:0001558
developmental growth involved in morphogenesis	Biological Process	GO:0060560	10	58	0.0177074	0.153932	ssc:100516027,SFRP2,100516027:down|ssc:396951,PTHLH,396951:up|ssc:100127483,BMPR2,100127483:down|ssc:397495,BDNF,397495:down|ssc:100153176,SFRP5,100153176:down|ssc:100516960,SLC12A2,100516960:down|ssc:100155958,SRF,100155958:down|ssc:100113425,BMP4,100113425:down|ssc:397497,FGF1,397497:down|ssc:397620,FN1,397620:down	http://amigo.geneontology.org/cgi-bin/amigo/term_details?term=GO:0060560
cell morphogenesis	Biological Process	GO:0000902	31	258	0.0179059	0.153932	ssc:100522873,EPHA2,100522873:down|ssc:396628,VDR,396628:down|ssc:100127483,BMPR2,100127483:down|ssc:100152404,HEY2,100152404:down|ssc:396665,-,396665:down|ssc:397495,BDNF,397495:down|ssc:399503,LIF,399503:down|ssc:100155958,SRF,100155958:down|ssc:100521487,WEE1,100521487:down|ssc:100113425,BMP4,100113425:down|ssc:100169702,PROX1,100169702:down|ssc:397620,FN1,397620:down|ssc:100519335,IFT57,10051…	http://amigo.geneontology.org/cgi-bin/amigo/term_details?term=GO:0000902
positive regulation of cell projection organization	Biological Process	GO:0031346	7	34	0.0179335	0.153932	ssc:100519703,F2RL1,100519703:down|ssc:100155958,SRF,100155958:down|ssc:100155631,FES,100155631:down|ssc:100127483,BMPR2,100127483:down|ssc:100621675,-,100621675:down|ssc:397620,FN1,397620:down|ssc:100627019,ABL2,100627019:down	http://amigo.geneontology.org/cgi-bin/amigo/term_details?term=GO:0031346
formation of primary germ layer	Biological Process	GO:0001704	7	34	0.0179335	0.153932	ssc:100516027,SFRP2,100516027:down|ssc:100522873,EPHA2,100522873:down|ssc:100155958,SRF,100155958:down|ssc:100155091,ITGA5,100155091:down|ssc:100127483,BMPR2,100127483:down|ssc:100113425,BMP4,100113425:down|ssc:397620,FN1,397620:down	http://amigo.geneontology.org/cgi-bin/amigo/term_details?term=GO:0001704
negative regulation of cell death	Biological Process	GO:0060548	27	218	0.0182592	0.153932	ssc:100286778,PDK4,100286778:down|ssc:100621027,CX3CL1,100621027:down|ssc:100152404,HEY2,100152404:down|ssc:397495,BDNF,397495:down|ssc:100153791,CYR61,100153791:down|ssc:100156860,BCL2A1,100156860:down|ssc:100519286,SERPINB2,100519286:down|ssc:100521992,HCLS1,100521992:down|ssc:100516296,EGR3,100516296:down|ssc:100113425,BMP4,100113425:down|ssc:100627019,ABL2,100627019:down|ssc:100518125,YBX3,10…	http://amigo.geneontology.org/cgi-bin/amigo/term_details?term=GO:0060548
reactive oxygen species metabolic process	Biological Process	GO:0072593	9	50	0.0183319	0.153932	ssc:100286778,PDK4,100286778:down|ssc:396724,OLR1,396724:down|ssc:100738470,NDUFAF2,100738470:up|ssc:100620479,NRROS,100620479:down|ssc:100153791,CYR61,100153791:down|ssc:100519703,F2RL1,100519703:down|ssc:100038002,ATPIF1,100038002:up|ssc:396623,TLR2,396623:down|ssc:100154394,ROMO1,100154394:up	http://amigo.geneontology.org/cgi-bin/amigo/term_details?term=GO:0072593
negative regulation of cellular macromolecule biosynthetic process	Biological Process	GO:2000113	36	310	0.0184724	0.153932	ssc:396927,ZP3,396927:up|ssc:396951,PTHLH,396951:up|ssc:396628,VDR,396628:down|ssc:100152404,HEY2,100152404:down|ssc:100625349,MXD1,100625349:down|ssc:100153176,SFRP5,100153176:down|ssc:100515035,GMNN,100515035:up|ssc:780421,CMKLR1,780421:down|ssc:100521992,HCLS1,100521992:down|ssc:100153960,NR1H4,100153960:up|ssc:100518125,YBX3,100518125:up|ssc:654298,ID2,654298:down|ssc:100156280,GREM1,10015628…	http://amigo.geneontology.org/cgi-bin/amigo/term_details?term=GO:2000113
reproductive structure development	Biological Process	GO:0048608	17	121	0.0184751	0.153932	ssc:396927,ZP3,396927:up|ssc:396628,VDR,396628:down|ssc:100152404,HEY2,100152404:down|ssc:100153791,CYR61,100153791:down|ssc:100622249,ARID5B,100622249:down|ssc:399503,LIF,399503:down|ssc:100113425,BMP4,100113425:down|ssc:100518125,YBX3,100518125:up|ssc:100516027,SFRP2,100516027:down|ssc:397093,INHBA,397093:down|ssc:100515339,KRT19,100515339:up|ssc:100520393,SPINK2,100520393:up|ssc:654297,CITED1,…	http://amigo.geneontology.org/cgi-bin/amigo/term_details?term=GO:0048608
positive regulation of cellular protein localization	Biological Process	GO:1903829	8	42	0.0185067	0.153932	ssc:100516027,SFRP2,100516027:down|ssc:100522873,EPHA2,100522873:down|ssc:100519746,DAB2,100519746:down|ssc:100156280,GREM1,100156280:down|ssc:399503,LIF,399503:down|ssc:100521992,HCLS1,100521992:down|ssc:100113425,BMP4,100113425:down|ssc:396623,TLR2,396623:down	http://amigo.geneontology.org/cgi-bin/amigo/term_details?term=GO:1903829
response to drug	Biological Process	GO:0042493	8	42	0.0185067	0.153932	ssc:100516027,SFRP2,100516027:down|ssc:397093,INHBA,397093:down|ssc:397495,BDNF,397495:down|ssc:100514958,SLAMF8,100514958:down|ssc:100134969,NFATC2,100134969:down|ssc:100620216,-,100620216:down|ssc:396623,TLR2,396623:down|ssc:397038,FBP1,397038:down	http://amigo.geneontology.org/cgi-bin/amigo/term_details?term=GO:0042493
regulation of protein localization to nucleus	Biological Process	GO:1900180	8	42	0.0185067	0.153932	ssc:100516027,SFRP2,100516027:down|ssc:100519746,DAB2,100519746:down|ssc:100156280,GREM1,100156280:down|ssc:100153176,SFRP5,100153176:down|ssc:399503,LIF,399503:down|ssc:100521992,HCLS1,100521992:down|ssc:100113425,BMP4,100113425:down|ssc:396623,TLR2,396623:down	http://amigo.geneontology.org/cgi-bin/amigo/term_details?term=GO:1900180
positive regulation of developmental growth	Biological Process	GO:0048639	8	42	0.0185067	0.153932	ssc:396927,ZP3,396927:up|ssc:100127483,BMPR2,100127483:down|ssc:100152404,HEY2,100152404:down|ssc:100155958,SRF,100155958:down|ssc:100525094,SASH3,100525094:down|ssc:100169702,PROX1,100169702:down|ssc:397620,FN1,397620:down|ssc:100518125,YBX3,100518125:up	http://amigo.geneontology.org/cgi-bin/amigo/term_details?term=GO:0048639
AMP binding	Molecular Function	GO:0016208	2	3	0.0188734	0.153932	ssc:100154828,ACSS1,100154828:down|ssc:397038,FBP1,397038:down	http://amigo.geneontology.org/cgi-bin/amigo/term_details?term=GO:0016208
antigen processing and presentation of exogenous peptide antigen via MHC class I	Biological Process	GO:0042590	2	3	0.0188734	0.153932	ssc:100174943,IFI30,100174943:down|ssc:397406,FCER1G,397406:down	http://amigo.geneontology.org/cgi-bin/amigo/term_details?term=GO:0042590
positive regulation of non-canonical Wnt signaling pathway	Biological Process	GO:2000052	2	3	0.0188734	0.153932	ssc:100519746,DAB2,100519746:down|ssc:100627019,ABL2,100627019:down	http://amigo.geneontology.org/cgi-bin/amigo/term_details?term=GO:2000052
neutrophil mediated cytotoxicity	Biological Process	GO:0070942	2	3	0.0188734	0.153932	ssc:396900,AMCF-II,396900:down|ssc:100519703,F2RL1,100519703:down	http://amigo.geneontology.org/cgi-bin/amigo/term_details?term=GO:0070942
positive regulation of Wnt signaling pathway, planar cell polarity pathway	Biological Process	GO:2000096	2	3	0.0188734	0.153932	ssc:100519746,DAB2,100519746:down|ssc:100627019,ABL2,100627019:down	http://amigo.geneontology.org/cgi-bin/amigo/term_details?term=GO:2000096
positive regulation of chemokine secretion	Biological Process	GO:0090197	2	3	0.0188734	0.153932	ssc:397614,IL4R,397614:down|ssc:100517086,CSF1R,100517086:down	http://amigo.geneontology.org/cgi-bin/amigo/term_details?term=GO:0090197
regulation of establishment of planar polarity involved in neural tube closure	Biological Process	GO:0090178	2	3	0.0188734	0.153932	ssc:100516027,SFRP2,100516027:down|ssc:100153176,SFRP5,100153176:down	http://amigo.geneontology.org/cgi-bin/amigo/term_details?term=GO:0090178
lens fiber cell development	Biological Process	GO:0070307	2	3	0.0188734	0.153932	ssc:100522873,EPHA2,100522873:down|ssc:100169702,PROX1,100169702:down	http://amigo.geneontology.org/cgi-bin/amigo/term_details?term=GO:0070307
establishment of planar polarity involved in neural tube closure	Biological Process	GO:0090177	2	3	0.0188734	0.153932	ssc:100516027,SFRP2,100516027:down|ssc:100153176,SFRP5,100153176:down	http://amigo.geneontology.org/cgi-bin/amigo/term_details?term=GO:0090177
regulation of osteoclast development	Biological Process	GO:2001204	2	3	0.0188734	0.153932	ssc:397649,LTF,397649:up|ssc:397405,TYROBP,397405:down	http://amigo.geneontology.org/cgi-bin/amigo/term_details?term=GO:2001204
pancreas morphogenesis	Biological Process	GO:0061113	2	3	0.0188734	0.153932	ssc:396766,CELA1,396766:up|ssc:100169702,PROX1,100169702:down	http://amigo.geneontology.org/cgi-bin/amigo/term_details?term=GO:0061113
vascular smooth muscle contraction	Biological Process	GO:0014829	2	3	0.0188734	0.153932	ssc:414911,EDNRB,414911:down|ssc:100049663,EDN3,100049663:up	http://amigo.geneontology.org/cgi-bin/amigo/term_details?term=GO:0014829
neutrophil mediated killing of symbiont cell	Biological Process	GO:0070943	2	3	0.0188734	0.153932	ssc:396900,AMCF-II,396900:down|ssc:100519703,F2RL1,100519703:down	http://amigo.geneontology.org/cgi-bin/amigo/term_details?term=GO:0070943
negative regulation of cardiac muscle cell apoptotic process	Biological Process	GO:0010667	2	3	0.0188734	0.153932	ssc:100516027,SFRP2,100516027:down|ssc:100152404,HEY2,100152404:down	http://amigo.geneontology.org/cgi-bin/amigo/term_details?term=GO:0010667
glucose 6-phosphate metabolic process	Biological Process	GO:0051156	2	3	0.0188734	0.153932	ssc:100038014,RPIA,100038014:down|ssc:100514142,GCK,100514142:up	http://amigo.geneontology.org/cgi-bin/amigo/term_details?term=GO:0051156
phosphorelay signal transduction system	Biological Process	GO:0000160	2	3	0.0188734	0.153932	ssc:100523692,KCNH4,100523692:down|ssc:100126293,CASS4,100126293:down	http://amigo.geneontology.org/cgi-bin/amigo/term_details?term=GO:0000160
locomotor rhythm	Biological Process	GO:0045475	2	3	0.0188734	0.153932	ssc:654298,ID2,654298:down|ssc:100519685,NAGLU,100519685:down	http://amigo.geneontology.org/cgi-bin/amigo/term_details?term=GO:0045475
negative regulation of insulin secretion involved in cellular response to glucose stimulus	Biological Process	GO:0061179	2	3	0.0188734	0.153932	ssc:100738470,NDUFAF2,100738470:up|ssc:100522131,FKBP1B,100522131:down	http://amigo.geneontology.org/cgi-bin/amigo/term_details?term=GO:0061179
neutrophil mediated killing of bacterium	Biological Process	GO:0070944	2	3	0.0188734	0.153932	ssc:396900,AMCF-II,396900:down|ssc:100519703,F2RL1,100519703:down	http://amigo.geneontology.org/cgi-bin/amigo/term_details?term=GO:0070944
neutrophil mediated killing of gram-negative bacterium	Biological Process	GO:0070945	2	3	0.0188734	0.153932	ssc:396900,AMCF-II,396900:down|ssc:100519703,F2RL1,100519703:down	http://amigo.geneontology.org/cgi-bin/amigo/term_details?term=GO:0070945
negative regulation of gluconeogenesis	Biological Process	GO:0045721	2	3	0.0188734	0.153932	ssc:100270814,-,100270814:down|ssc:100514142,GCK,100514142:up	http://amigo.geneontology.org/cgi-bin/amigo/term_details?term=GO:0045721
phosphorelay sensor kinase activity	Molecular Function	GO:0000155	2	3	0.0188734	0.153932	ssc:100523692,KCNH4,100523692:down|ssc:100126293,CASS4,100126293:down	http://amigo.geneontology.org/cgi-bin/amigo/term_details?term=GO:0000155
negative regulation of striated muscle cell apoptotic process	Biological Process	GO:0010664	2	3	0.0188734	0.153932	ssc:100516027,SFRP2,100516027:down|ssc:100152404,HEY2,100152404:down	http://amigo.geneontology.org/cgi-bin/amigo/term_details?term=GO:0010664
establishment of planar polarity of embryonic epithelium	Biological Process	GO:0042249	2	3	0.0188734	0.153932	ssc:100516027,SFRP2,100516027:down|ssc:100153176,SFRP5,100153176:down	http://amigo.geneontology.org/cgi-bin/amigo/term_details?term=GO:0042249
thyroid hormone binding	Molecular Function	GO:0070324	2	3	0.0188734	0.153932	ssc:100525333,CRYM,100525333:up|ssc:396969,CTSH,396969:down	http://amigo.geneontology.org/cgi-bin/amigo/term_details?term=GO:0070324
neutrophil degranulation	Biological Process	GO:0043312	2	3	0.0188734	0.153932	ssc:100152253,STX11,100152253:down|ssc:100524561,PPBP,100524561:down	http://amigo.geneontology.org/cgi-bin/amigo/term_details?term=GO:0043312
glyceraldehyde-3-phosphate metabolic process	Biological Process	GO:0019682	2	3	0.0188734	0.153932	ssc:100038014,RPIA,100038014:down|ssc:100127150,TKT,100127150:down	http://amigo.geneontology.org/cgi-bin/amigo/term_details?term=GO:0019682
regulation of catenin import into nucleus	Biological Process	GO:0035412	2	3	0.0188734	0.153932	ssc:100516027,SFRP2,100516027:down|ssc:100153176,SFRP5,100153176:down	http://amigo.geneontology.org/cgi-bin/amigo/term_details?term=GO:0035412
catenin import into nucleus	Biological Process	GO:0035411	2	3	0.0188734	0.153932	ssc:100516027,SFRP2,100516027:down|ssc:100153176,SFRP5,100153176:down	http://amigo.geneontology.org/cgi-bin/amigo/term_details?term=GO:0035411
positive regulation of superoxide anion generation	Biological Process	GO:0032930	2	3	0.0188734	0.153932	ssc:396724,OLR1,396724:down|ssc:100519703,F2RL1,100519703:down	http://amigo.geneontology.org/cgi-bin/amigo/term_details?term=GO:0032930
positive regulation of leukocyte degranulation	Biological Process	GO:0043302	2	3	0.0188734	0.153932	ssc:100519703,F2RL1,100519703:down|ssc:397406,FCER1G,397406:down	http://amigo.geneontology.org/cgi-bin/amigo/term_details?term=GO:0043302
positive regulation of myeloid leukocyte cytokine production involved in immune response	Biological Process	GO:0061081	2	3	0.0188734	0.153932	ssc:396623,TLR2,396623:down|ssc:397406,FCER1G,397406:down	http://amigo.geneontology.org/cgi-bin/amigo/term_details?term=GO:0061081
Fc-epsilon receptor signaling pathway	Biological Process	GO:0038095	2	3	0.0188734	0.153932	ssc:397166,MS4A2,397166:down|ssc:397406,FCER1G,397406:down	http://amigo.geneontology.org/cgi-bin/amigo/term_details?term=GO:0038095
planar cell polarity pathway involved in neural tube closure	Biological Process	GO:0090179	2	3	0.0188734	0.153932	ssc:100516027,SFRP2,100516027:down|ssc:100153176,SFRP5,100153176:down	http://amigo.geneontology.org/cgi-bin/amigo/term_details?term=GO:0090179
circulatory system development	Biological Process	GO:0072359	29	239	0.0191289	0.155461	ssc:100127155,LMO4,100127155:up|ssc:100522873,EPHA2,100522873:down|ssc:100621027,CX3CL1,100621027:down|ssc:100127483,BMPR2,100127483:down|ssc:100152404,HEY2,100152404:down|ssc:396665,-,396665:down|ssc:100511141,VASH1,100511141:down|ssc:100153791,CYR61,100153791:down|ssc:399503,LIF,399503:down|ssc:100155958,SRF,100155958:down|ssc:397547,NPY1R,397547:up|ssc:100622445,ELK3,100622445:down|ssc:1005162…	http://amigo.geneontology.org/cgi-bin/amigo/term_details?term=GO:0072359
cardiovascular system development	Biological Process	GO:0072358	29	239	0.0191289	0.155461	ssc:100127155,LMO4,100127155:up|ssc:100522873,EPHA2,100522873:down|ssc:100621027,CX3CL1,100621027:down|ssc:100127483,BMPR2,100127483:down|ssc:100152404,HEY2,100152404:down|ssc:396665,-,396665:down|ssc:100511141,VASH1,100511141:down|ssc:100153791,CYR61,100153791:down|ssc:399503,LIF,399503:down|ssc:100155958,SRF,100155958:down|ssc:397547,NPY1R,397547:up|ssc:100622445,ELK3,100622445:down|ssc:1005162…	http://amigo.geneontology.org/cgi-bin/amigo/term_details?term=GO:0072358
biological regulation	Biological Process	GO:0065007	280	3150	0.019142	0.155461	ssc:100270814,-,100270814:down|ssc:397122,IL1B1,397122:down|ssc:100621027,CX3CL1,100621027:down|ssc:396851,PIK3R5,396851:down|ssc:100152404,HEY2,100152404:down|ssc:100622220,SLC25A38,100622220:up|ssc:100037292,ACKR4,100037292:down|ssc:100144470,PHEROC,100144470:down|ssc:100519335,IFT57,100519335:up|ssc:100522360,-,100522360:down|ssc:100155795,MYLIP,100155795:up|ssc:100512012,WFIKKN2,100512012:up|…	http://amigo.geneontology.org/cgi-bin/amigo/term_details?term=GO:0065007
regulation of myeloid leukocyte differentiation	Biological Process	GO:0002761	6	27	0.0193689	0.157082	ssc:397649,LTF,397649:up|ssc:100521992,HCLS1,100521992:down|ssc:399503,LIF,399503:down|ssc:397405,TYROBP,397405:down|ssc:654298,ID2,654298:down|ssc:414374,CCR1,414374:down	http://amigo.geneontology.org/cgi-bin/amigo/term_details?term=GO:0002761
cell growth	Biological Process	GO:0016049	14	94	0.0194843	0.157365	ssc:100516027,SFRP2,100516027:down|ssc:100154395,NOV,100154395:down|ssc:397093,INHBA,397093:down|ssc:100152419,FRZB,100152419:up|ssc:100127483,BMPR2,100127483:down|ssc:100525983,DCUN1D3,100525983:down|ssc:397495,BDNF,397495:down|ssc:100153791,CYR61,100153791:down|ssc:100152462,ACVR1B,100152462:down|ssc:100155958,SRF,100155958:down|ssc:100525560,CDKN2D,100525560:up|ssc:100271930,IL7R,100271930:dow…	http://amigo.geneontology.org/cgi-bin/amigo/term_details?term=GO:0016049
positive regulation of protein kinase activity	Biological Process	GO:0045860	14	94	0.0194843	0.157365	ssc:396927,ZP3,396927:up|ssc:396851,PIK3R5,396851:down|ssc:100519746,DAB2,100519746:down|ssc:396865,CHI3L1,396865:down|ssc:100517086,CSF1R,100517086:down|ssc:100156280,GREM1,100156280:down|ssc:100520599,FAM58A,100520599:up|ssc:100049663,EDN3,100049663:up|ssc:100145894,JTB,100145894:up|ssc:100153791,CYR61,100153791:down|ssc:100113425,BMP4,100113425:down|ssc:397201,JAK2,397201:down|ssc:100169702,PR…	http://amigo.geneontology.org/cgi-bin/amigo/term_details?term=GO:0045860
negative regulation of nitrogen compound metabolic process	Biological Process	GO:0051172	38	332	0.0194859	0.157365	ssc:396927,ZP3,396927:up|ssc:396951,PTHLH,396951:up|ssc:396628,VDR,396628:down|ssc:100152404,HEY2,100152404:down|ssc:100625349,MXD1,100625349:down|ssc:100153176,SFRP5,100153176:down|ssc:100515035,GMNN,100515035:up|ssc:780421,CMKLR1,780421:down|ssc:100521992,HCLS1,100521992:down|ssc:100153960,NR1H4,100153960:up|ssc:100518125,YBX3,100518125:up|ssc:654298,ID2,654298:down|ssc:100156280,GREM1,10015628…	http://amigo.geneontology.org/cgi-bin/amigo/term_details?term=GO:0051172
pyruvate metabolic process	Biological Process	GO:0006090	5	20	0.0196809	0.158495	ssc:100286778,PDK4,100286778:down|ssc:100514142,GCK,100514142:up|ssc:494561,HK2,494561:down|ssc:100522855,HK3,100522855:down|ssc:397038,FBP1,397038:down	http://amigo.geneontology.org/cgi-bin/amigo/term_details?term=GO:0006090
chemokine production	Biological Process	GO:0032602	5	20	0.0196809	0.158495	ssc:396900,AMCF-II,396900:down|ssc:100519703,F2RL1,100519703:down|ssc:397614,IL4R,397614:down|ssc:100517086,CSF1R,100517086:down|ssc:396623,TLR2,396623:down	http://amigo.geneontology.org/cgi-bin/amigo/term_details?term=GO:0032602
regulation of cellular metabolic process	Biological Process	GO:0031323	133	1394	0.0201305	0.161889	ssc:100270814,-,100270814:down|ssc:100286778,PDK4,100286778:down|ssc:397122,IL1B1,397122:down|ssc:396851,PIK3R5,396851:down|ssc:100152404,HEY2,100152404:down|ssc:100153460,AKAP5,100153460:down|ssc:396665,-,396665:down|ssc:100145894,JTB,100145894:up|ssc:780421,CMKLR1,780421:down|ssc:100144523,PMEPA1,100144523:down|ssc:397620,FN1,397620:down|ssc:100519335,IFT57,100519335:up|ssc:100154994,SERPINB10,…	http://amigo.geneontology.org/cgi-bin/amigo/term_details?term=GO:0031323
transport	Biological Process	GO:0006810	110	1129	0.0201624	0.161919	ssc:100621457,-,100621457:down|ssc:100153460,AKAP5,100153460:down|ssc:100153176,SFRP5,100153176:down|ssc:397186,-,397186:down|ssc:100152038,OSM,100152038:down|ssc:445528,HLA-DMA,445528:down|ssc:100622220,SLC25A38,100622220:up|ssc:102158732,-,102158732:down|ssc:100037292,ACKR4,100037292:down|ssc:100518612,MFSD2A,100518612:down|ssc:100144470,PHEROC,100144470:down|ssc:100519335,IFT57,100519335:up|ss…	http://amigo.geneontology.org/cgi-bin/amigo/term_details?term=GO:0006810
positive regulation of transferase activity	Biological Process	GO:0051347	16	113	0.0204534	0.163947	ssc:396927,ZP3,396927:up|ssc:396851,PIK3R5,396851:down|ssc:100145894,JTB,100145894:up|ssc:100153791,CYR61,100153791:down|ssc:100155895,ARRDC4,100155895:down|ssc:100113425,BMP4,100113425:down|ssc:397201,JAK2,397201:down|ssc:100169702,PROX1,100169702:down|ssc:100155615,AVPI1,100155615:up|ssc:100519746,DAB2,100519746:down|ssc:100522260,PPP1R3G,100522260:up|ssc:100156280,GREM1,100156280:down|ssc:1005…	http://amigo.geneontology.org/cgi-bin/amigo/term_details?term=GO:0051347
establishment of localization	Biological Process	GO:0051234	113	1164	0.020472	0.163947	ssc:100621457,-,100621457:down|ssc:100522873,EPHA2,100522873:down|ssc:100153460,AKAP5,100153460:down|ssc:100153176,SFRP5,100153176:down|ssc:397186,-,397186:down|ssc:100152038,OSM,100152038:down|ssc:445528,HLA-DMA,445528:down|ssc:100622220,SLC25A38,100622220:up|ssc:102158732,-,102158732:down|ssc:100037292,ACKR4,100037292:down|ssc:100518612,MFSD2A,100518612:down|ssc:100144470,PHEROC,100144470:down|…	http://amigo.geneontology.org/cgi-bin/amigo/term_details?term=GO:0051234
fat cell differentiation	Biological Process	GO:0045444	9	51	0.0207088	0.165383	ssc:100516027,SFRP2,100516027:down|ssc:100152419,FRZB,100152419:up|ssc:100156403,LRRC8C,100156403:down|ssc:654298,ID2,654298:down|ssc:733670,RGS2,733670:up|ssc:100038004,EGR2,100038004:down|ssc:780421,CMKLR1,780421:down|ssc:100513746,NOCT,100513746:down|ssc:100622249,ARID5B,100622249:down	http://amigo.geneontology.org/cgi-bin/amigo/term_details?term=GO:0045444
cognition	Biological Process	GO:0050890	9	51	0.0207088	0.165383	ssc:100155091,ITGA5,100155091:down|ssc:100623510,S100B,100623510:up|ssc:397495,BDNF,397495:down|ssc:100155958,SRF,100155958:down|ssc:100520203,JAKMIP1,100520203:up|ssc:397251,PLK2,397251:down|ssc:100524790,RGS14,100524790:down|ssc:100515283,GM2A,100515283:down|ssc:100627019,ABL2,100627019:down	http://amigo.geneontology.org/cgi-bin/amigo/term_details?term=GO:0050890
alcohol biosynthetic process	Biological Process	GO:0046165	7	35	0.0208915	0.166541	ssc:100312968,EBP,100312968:up|ssc:494015,SCAP,494015:up|ssc:396628,VDR,396628:down|ssc:397497,FGF1,397497:down|ssc:100144446,HMGCR,100144446:up|ssc:100518796,SGMS2,100518796:down|ssc:100152963,PEX2,100152963:up	http://amigo.geneontology.org/cgi-bin/amigo/term_details?term=GO:0046165
negative regulation of nucleic acid-templated transcription	Biological Process	GO:1903507	34	292	0.0209118	0.166541	ssc:396927,ZP3,396927:up|ssc:396951,PTHLH,396951:up|ssc:396628,VDR,396628:down|ssc:100152404,HEY2,100152404:down|ssc:100625349,MXD1,100625349:down|ssc:100153176,SFRP5,100153176:down|ssc:100515035,GMNN,100515035:up|ssc:780421,CMKLR1,780421:down|ssc:100521992,HCLS1,100521992:down|ssc:100153960,NR1H4,100153960:up|ssc:100518125,YBX3,100518125:up|ssc:654298,ID2,654298:down|ssc:100156280,GREM1,10015628…	http://amigo.geneontology.org/cgi-bin/amigo/term_details?term=GO:1903507
learning or memory	Biological Process	GO:0007611	8	43	0.0211693	0.168126	ssc:100155091,ITGA5,100155091:down|ssc:100623510,S100B,100623510:up|ssc:397495,BDNF,397495:down|ssc:100155958,SRF,100155958:down|ssc:397251,PLK2,397251:down|ssc:100524790,RGS14,100524790:down|ssc:100515283,GM2A,100515283:down|ssc:100627019,ABL2,100627019:down	http://amigo.geneontology.org/cgi-bin/amigo/term_details?term=GO:0007611
secondary active transmembrane transporter activity	Molecular Function	GO:0015291	8	43	0.0211693	0.168126	ssc:100156430,-,100156430:down|ssc:397263,CLCN5,397263:down|ssc:100738803,-,100738803:down|ssc:100624458,ANKH,100624458:down|ssc:100158241,SLC16A7,100158241:down|ssc:100516960,SLC12A2,100516960:down|ssc:100518612,MFSD2A,100518612:down|ssc:397458,SLC9A1,397458:down	http://amigo.geneontology.org/cgi-bin/amigo/term_details?term=GO:0015291
cellular response to lipid	Biological Process	GO:0071396	14	95	0.0212087	0.168207	ssc:100127164,PTGER2,100127164:down|ssc:399541,TLR4,399541:down|ssc:397649,LTF,397649:up|ssc:100286778,PDK4,100286778:down|ssc:396628,VDR,396628:down|ssc:100154350,NFKBIL1,100154350:up|ssc:414371,CCR5,414371:down|ssc:100524418,PTGDR,100524418:down|ssc:397106,IL10,397106:down|ssc:100113425,BMP4,100113425:down|ssc:100620216,-,100620216:down|ssc:100153960,NR1H4,100153960:up|ssc:100627019,ABL2,100627…	http://amigo.geneontology.org/cgi-bin/amigo/term_details?term=GO:0071396
reproductive system development	Biological Process	GO:0061458	17	123	0.0214194	0.169644	ssc:396927,ZP3,396927:up|ssc:396628,VDR,396628:down|ssc:100152404,HEY2,100152404:down|ssc:100153791,CYR61,100153791:down|ssc:100622249,ARID5B,100622249:down|ssc:399503,LIF,399503:down|ssc:100113425,BMP4,100113425:down|ssc:100518125,YBX3,100518125:up|ssc:100516027,SFRP2,100516027:down|ssc:397093,INHBA,397093:down|ssc:100515339,KRT19,100515339:up|ssc:100520393,SPINK2,100520393:up|ssc:654297,CITED1,…	http://amigo.geneontology.org/cgi-bin/amigo/term_details?term=GO:0061458
B cell activation	Biological Process	GO:0042113	10	60	0.0221153	0.171741	ssc:100519177,GIMAP1,100519177:down|ssc:100627864,LAT2,100627864:down|ssc:654298,ID2,654298:down|ssc:100134969,NFATC2,100134969:down|ssc:100153546,NHEJ1,100153546:up|ssc:100525094,SASH3,100525094:down|ssc:397106,IL10,397106:down|ssc:100038026,TNFSF13B,100038026:down|ssc:100271930,IL7R,100271930:down|ssc:397441,CD86,397441:down	http://amigo.geneontology.org/cgi-bin/amigo/term_details?term=GO:0042113
negative regulation of cellular biosynthetic process	Biological Process	GO:0031327	38	335	0.0221763	0.171741	ssc:100270814,-,100270814:down|ssc:396927,ZP3,396927:up|ssc:396951,PTHLH,396951:up|ssc:396628,VDR,396628:down|ssc:100152404,HEY2,100152404:down|ssc:100625349,MXD1,100625349:down|ssc:100153176,SFRP5,100153176:down|ssc:100515035,GMNN,100515035:up|ssc:780421,CMKLR1,780421:down|ssc:100521992,HCLS1,100521992:down|ssc:100153960,NR1H4,100153960:up|ssc:100518125,YBX3,100518125:up|ssc:654298,ID2,654298:do…	http://amigo.geneontology.org/cgi-bin/amigo/term_details?term=GO:0031327
positive regulation of heart contraction	Biological Process	GO:0045823	3	8	0.022192	0.171741	ssc:733670,RGS2,733670:up|ssc:100152404,HEY2,100152404:down|ssc:100049663,EDN3,100049663:up	http://amigo.geneontology.org/cgi-bin/amigo/term_details?term=GO:0045823
lymph vessel development	Biological Process	GO:0001945	3	8	0.022192	0.171741	ssc:100127483,BMPR2,100127483:down|ssc:100169702,PROX1,100169702:down|ssc:100511141,VASH1,100511141:down	http://amigo.geneontology.org/cgi-bin/amigo/term_details?term=GO:0001945
neuron spine	Cellular Component	GO:0044309	3	8	0.022192	0.171741	ssc:100524790,RGS14,100524790:down|ssc:654413,PALMD,654413:down|ssc:100627019,ABL2,100627019:down	http://amigo.geneontology.org/cgi-bin/amigo/term_details?term=GO:0044309
plasma lipoprotein particle clearance	Biological Process	GO:0034381	3	8	0.022192	0.171741	ssc:733630,VLDLR,733630:up|ssc:100155795,MYLIP,100155795:up|ssc:100511665,MSR1,100511665:down	http://amigo.geneontology.org/cgi-bin/amigo/term_details?term=GO:0034381
positive regulation of monocyte chemotaxis	Biological Process	GO:0090026	3	8	0.022192	0.171741	ssc:414372,CCR2,414372:down|ssc:397271,AIF1,397271:down|ssc:414374,CCR1,414374:down	http://amigo.geneontology.org/cgi-bin/amigo/term_details?term=GO:0090026
positive regulation of axon extension	Biological Process	GO:0045773	3	8	0.022192	0.171741	ssc:100155958,SRF,100155958:down|ssc:100127483,BMPR2,100127483:down|ssc:397620,FN1,397620:down	http://amigo.geneontology.org/cgi-bin/amigo/term_details?term=GO:0045773
renal vesicle development	Biological Process	GO:0072087	3	8	0.022192	0.171741	ssc:399503,LIF,399503:down|ssc:100113425,BMP4,100113425:down|ssc:100156280,GREM1,100156280:down	http://amigo.geneontology.org/cgi-bin/amigo/term_details?term=GO:0072087
cellular aldehyde metabolic process	Biological Process	GO:0006081	3	8	0.022192	0.171741	ssc:100038014,RPIA,100038014:down|ssc:100127150,TKT,100127150:down|ssc:397082,DHRS4,397082:down	http://amigo.geneontology.org/cgi-bin/amigo/term_details?term=GO:0006081
epiboly involved in wound healing	Biological Process	GO:0090505	3	8	0.022192	0.171741	ssc:397564,HBEGF,397564:down|ssc:100153791,CYR61,100153791:down|ssc:100155091,ITGA5,100155091:down	http://amigo.geneontology.org/cgi-bin/amigo/term_details?term=GO:0090505
regulation of monocyte chemotaxis	Biological Process	GO:0090025	3	8	0.022192	0.171741	ssc:414372,CCR2,414372:down|ssc:397271,AIF1,397271:down|ssc:414374,CCR1,414374:down	http://amigo.geneontology.org/cgi-bin/amigo/term_details?term=GO:0090025
wound healing, spreading of cells	Biological Process	GO:0044319	3	8	0.022192	0.171741	ssc:397564,HBEGF,397564:down|ssc:100153791,CYR61,100153791:down|ssc:100155091,ITGA5,100155091:down	http://amigo.geneontology.org/cgi-bin/amigo/term_details?term=GO:0044319
negative regulation of cellular carbohydrate metabolic process	Biological Process	GO:0010677	3	8	0.022192	0.171741	ssc:100270814,-,100270814:down|ssc:100514142,GCK,100514142:up|ssc:397038,FBP1,397038:down	http://amigo.geneontology.org/cgi-bin/amigo/term_details?term=GO:0010677
secondary metabolic process	Biological Process	GO:0019748	3	8	0.022192	0.171741	ssc:654297,CITED1,654297:up|ssc:396816,AKR1B1,396816:down|ssc:397132,FMO1,397132:down	http://amigo.geneontology.org/cgi-bin/amigo/term_details?term=GO:0019748
renal vesicle morphogenesis	Biological Process	GO:0072077	3	8	0.022192	0.171741	ssc:399503,LIF,399503:down|ssc:100113425,BMP4,100113425:down|ssc:100156280,GREM1,100156280:down	http://amigo.geneontology.org/cgi-bin/amigo/term_details?term=GO:0072077
dendritic spine	Cellular Component	GO:0043197	3	8	0.022192	0.171741	ssc:100524790,RGS14,100524790:down|ssc:654413,PALMD,654413:down|ssc:100627019,ABL2,100627019:down	http://amigo.geneontology.org/cgi-bin/amigo/term_details?term=GO:0043197
regulation of biological process	Biological Process	GO:0050789	267	2999	0.0222924	0.172287	ssc:100270814,-,100270814:down|ssc:397122,IL1B1,397122:down|ssc:100621027,CX3CL1,100621027:down|ssc:396851,PIK3R5,396851:down|ssc:100152404,HEY2,100152404:down|ssc:100037292,ACKR4,100037292:down|ssc:100519335,IFT57,100519335:up|ssc:100522360,-,100522360:down|ssc:100155795,MYLIP,100155795:up|ssc:100512012,WFIKKN2,100512012:up|ssc:403163,EPCAM,403163:down|ssc:100523472,DUSP19,100523472:up|ssc:39761…	http://amigo.geneontology.org/cgi-bin/amigo/term_details?term=GO:0050789
establishment of localization in cell	Biological Process	GO:0051649	56	528	0.0224639	0.17308	ssc:399541,TLR4,399541:down|ssc:414375,XCR1,414375:down|ssc:396927,ZP3,396927:up|ssc:100153460,AKAP5,100153460:down|ssc:100153176,SFRP5,100153176:down|ssc:100524561,PPBP,100524561:down|ssc:100521992,HCLS1,100521992:down|ssc:100152038,OSM,100152038:down|ssc:100519335,IFT57,100519335:up|ssc:100627019,ABL2,100627019:down|ssc:404772,GEM,404772:down|ssc:100517086,CSF1R,100517086:down|ssc:100038004,EGR…	http://amigo.geneontology.org/cgi-bin/amigo/term_details?term=GO:0051649
vascular endothelial growth factor receptor signaling pathway	Biological Process	GO:0048010	4	14	0.022696	0.17308	ssc:100127483,BMPR2,100127483:down|ssc:397311,KDR,397311:down|ssc:396667,PTPN1,396667:down|ssc:100521986,MAPKAPK2,100521986:down	http://amigo.geneontology.org/cgi-bin/amigo/term_details?term=GO:0048010
negative regulation of osteoblast differentiation	Biological Process	GO:0045668	4	14	0.022696	0.17308	ssc:654297,CITED1,654297:up|ssc:100513746,NOCT,100513746:down|ssc:100522839,ID1,100522839:up|ssc:654298,ID2,654298:down	http://amigo.geneontology.org/cgi-bin/amigo/term_details?term=GO:0045668
regulation of interleukin-2 production	Biological Process	GO:0032663	4	14	0.022696	0.17308	ssc:397094,IL1A,397094:down|ssc:100525094,SASH3,100525094:down|ssc:100620216,-,100620216:down|ssc:100627019,ABL2,100627019:down	http://amigo.geneontology.org/cgi-bin/amigo/term_details?term=GO:0032663
negative regulation of tumor necrosis factor superfamily cytokine production	Biological Process	GO:1903556	4	14	0.022696	0.17308	ssc:397649,LTF,397649:up|ssc:397106,IL10,397106:down|ssc:100515612,C5AR2,100515612:down|ssc:100154350,NFKBIL1,100154350:up	http://amigo.geneontology.org/cgi-bin/amigo/term_details?term=GO:1903556
platelet-derived growth factor receptor signaling pathway	Biological Process	GO:0048008	4	14	0.022696	0.17308	ssc:100622249,ARID5B,100622249:down|ssc:396667,PTPN1,396667:down|ssc:100627019,ABL2,100627019:down|ssc:100519275,CSRNP1,100519275:down	http://amigo.geneontology.org/cgi-bin/amigo/term_details?term=GO:0048008
glycolytic process	Biological Process	GO:0006096	4	14	0.022696	0.17308	ssc:100514142,GCK,100514142:up|ssc:494561,HK2,494561:down|ssc:100522855,HK3,100522855:down|ssc:397038,FBP1,397038:down	http://amigo.geneontology.org/cgi-bin/amigo/term_details?term=GO:0006096
positive regulation of myeloid leukocyte differentiation	Biological Process	GO:0002763	4	14	0.022696	0.17308	ssc:100521992,HCLS1,100521992:down|ssc:399503,LIF,399503:down|ssc:654298,ID2,654298:down|ssc:414374,CCR1,414374:down	http://amigo.geneontology.org/cgi-bin/amigo/term_details?term=GO:0002763
negative regulation of cytokine secretion	Biological Process	GO:0050710	4	14	0.022696	0.17308	ssc:100516668,RABGEF1,100516668:down|ssc:100519703,F2RL1,100519703:down|ssc:397106,IL10,397106:down|ssc:100515612,C5AR2,100515612:down	http://amigo.geneontology.org/cgi-bin/amigo/term_details?term=GO:0050710
negative regulation of hormone secretion	Biological Process	GO:0046888	4	14	0.022696	0.17308	ssc:100738470,NDUFAF2,100738470:up|ssc:100152038,OSM,100152038:down|ssc:399503,LIF,399503:down|ssc:100522131,FKBP1B,100522131:down	http://amigo.geneontology.org/cgi-bin/amigo/term_details?term=GO:0046888
negative regulation of protein secretion	Biological Process	GO:0050709	6	28	0.0230043	0.174735	ssc:100516668,RABGEF1,100516668:down|ssc:100738470,NDUFAF2,100738470:up|ssc:100519703,F2RL1,100519703:down|ssc:100522131,FKBP1B,100522131:down|ssc:397106,IL10,397106:down|ssc:100515612,C5AR2,100515612:down	http://amigo.geneontology.org/cgi-bin/amigo/term_details?term=GO:0050709
primary neural tube formation	Biological Process	GO:0014020	6	28	0.0230043	0.174735	ssc:100516027,SFRP2,100516027:down|ssc:100127155,LMO4,100127155:up|ssc:100620499,LUZP1,100620499:down|ssc:100113425,BMP4,100113425:down|ssc:100519335,IFT57,100519335:up|ssc:100153176,SFRP5,100153176:down	http://amigo.geneontology.org/cgi-bin/amigo/term_details?term=GO:0014020
growth factor binding	Molecular Function	GO:0019838	6	28	0.0230043	0.174735	ssc:100153791,CYR61,100153791:down|ssc:100154395,NOV,100154395:down|ssc:100156882,FURIN,100156882:down|ssc:100152462,ACVR1B,100152462:down|ssc:397311,KDR,397311:down|ssc:396665,-,396665:down	http://amigo.geneontology.org/cgi-bin/amigo/term_details?term=GO:0019838
regulation of hormone secretion	Biological Process	GO:0046883	8	44	0.0240923	0.181689	ssc:397093,INHBA,397093:down|ssc:100738470,NDUFAF2,100738470:up|ssc:100049663,EDN3,100049663:up|ssc:100522131,FKBP1B,100522131:down|ssc:399503,LIF,399503:down|ssc:100152038,OSM,100152038:down|ssc:100514142,GCK,100514142:up|ssc:100518141,C2CD2L,100518141:down	http://amigo.geneontology.org/cgi-bin/amigo/term_details?term=GO:0046883
vascular process in circulatory system	Biological Process	GO:0003018	8	44	0.0240923	0.181689	ssc:396724,OLR1,396724:down|ssc:100127483,BMPR2,100127483:down|ssc:733670,RGS2,733670:up|ssc:100049663,EDN3,100049663:up|ssc:100522018,GCLC,100522018:down|ssc:100519703,F2RL1,100519703:down|ssc:396915,EDN1,396915:down|ssc:414911,EDNRB,414911:down	http://amigo.geneontology.org/cgi-bin/amigo/term_details?term=GO:0003018
mitochondrial respiratory chain complex I	Cellular Component	GO:0005747	5	21	0.0241462	0.181689	ssc:100522775,NDUFB11,100522775:up|ssc:100739619,NDUFB1,100739619:up|ssc:100523751,NDUFB5,100523751:up|ssc:733605,NDUFB6,733605:up|ssc:100154443,NDUFA8,100154443:up	http://amigo.geneontology.org/cgi-bin/amigo/term_details?term=GO:0005747
respiratory chain complex I	Cellular Component	GO:0045271	5	21	0.0241462	0.181689	ssc:100522775,NDUFB11,100522775:up|ssc:100739619,NDUFB1,100739619:up|ssc:100523751,NDUFB5,100523751:up|ssc:733605,NDUFB6,733605:up|ssc:100154443,NDUFA8,100154443:up	http://amigo.geneontology.org/cgi-bin/amigo/term_details?term=GO:0045271
positive regulation of osteoblast differentiation	Biological Process	GO:0045669	5	21	0.0241462	0.181689	ssc:100516027,SFRP2,100516027:down|ssc:100153791,CYR61,100153791:down|ssc:397649,LTF,397649:up|ssc:100127483,BMPR2,100127483:down|ssc:100113425,BMP4,100113425:down	http://amigo.geneontology.org/cgi-bin/amigo/term_details?term=GO:0045669
NADH dehydrogenase complex	Cellular Component	GO:0030964	5	21	0.0241462	0.181689	ssc:100522775,NDUFB11,100522775:up|ssc:100739619,NDUFB1,100739619:up|ssc:100523751,NDUFB5,100523751:up|ssc:733605,NDUFB6,733605:up|ssc:100154443,NDUFA8,100154443:up	http://amigo.geneontology.org/cgi-bin/amigo/term_details?term=GO:0030964
smooth muscle contraction	Biological Process	GO:0006939	5	21	0.0241462	0.181689	ssc:100522131,FKBP1B,100522131:down|ssc:100155958,SRF,100155958:down|ssc:733670,RGS2,733670:up|ssc:414911,EDNRB,414911:down|ssc:100049663,EDN3,100049663:up	http://amigo.geneontology.org/cgi-bin/amigo/term_details?term=GO:0006939
positive regulation of endopeptidase activity	Biological Process	GO:0010950	7	36	0.0241725	0.181689	ssc:100516027,SFRP2,100516027:down|ssc:100153791,CYR61,100153791:down|ssc:396969,CTSH,396969:down|ssc:100627352,FAM162A,100627352:up|ssc:100127489,S100A9,100127489:down|ssc:100513283,APAF1,100513283:down|ssc:100519335,IFT57,100519335:up	http://amigo.geneontology.org/cgi-bin/amigo/term_details?term=GO:0010950
actin filament-based process	Biological Process	GO:0030029	19	144	0.0243656	0.182901	ssc:100127489,S100A9,100127489:down|ssc:100621675,-,100621675:down|ssc:100623651,DSC2,100623651:down|ssc:100522109,ELMO1,100522109:down|ssc:100155958,SRF,100155958:down|ssc:100521992,HCLS1,100521992:down|ssc:100169702,PROX1,100169702:down|ssc:100627019,ABL2,100627019:down|ssc:100520585,FMNL1,100520585:down|ssc:100515339,KRT19,100515339:up|ssc:100155631,FES,100155631:down|ssc:100517086,CSF1R,10051…	http://amigo.geneontology.org/cgi-bin/amigo/term_details?term=GO:0030029
regulation of defense response	Biological Process	GO:0031347	15	106	0.0244531	0.183318	ssc:399541,TLR4,399541:down|ssc:100627693,RAB7B,100627693:down|ssc:396900,AMCF-II,396900:down|ssc:100038025,CLEC7A,100038025:down|ssc:396927,ZP3,396927:up|ssc:100621027,CX3CL1,100621027:down|ssc:100127489,S100A9,100127489:down|ssc:100154350,NFKBIL1,100154350:up|ssc:100516668,RABGEF1,100516668:down|ssc:100519703,F2RL1,100519703:down|ssc:397106,IL10,397106:down|ssc:396623,TLR2,396623:down|ssc:39740…	http://amigo.geneontology.org/cgi-bin/amigo/term_details?term=GO:0031347
positive regulation of neurogenesis	Biological Process	GO:0050769	11	70	0.02527	0.188587	ssc:100155631,FES,100155631:down|ssc:100622059,KCTD11,100622059:down|ssc:100127483,BMPR2,100127483:down|ssc:654298,ID2,654298:down|ssc:397495,BDNF,397495:down|ssc:100155958,SRF,100155958:down|ssc:399503,LIF,399503:down|ssc:100113425,BMP4,100113425:down|ssc:100169702,PROX1,100169702:down|ssc:397620,FN1,397620:down|ssc:100627019,ABL2,100627019:down	http://amigo.geneontology.org/cgi-bin/amigo/term_details?term=GO:0050769
heart morphogenesis	Biological Process	GO:0003007	11	70	0.02527	0.188587	ssc:100516027,SFRP2,100516027:down|ssc:654298,ID2,654298:down|ssc:100152404,HEY2,100152404:down|ssc:396665,-,396665:down|ssc:100521305,SMAD7,100521305:down|ssc:100153791,CYR61,100153791:down|ssc:100155958,SRF,100155958:down|ssc:397547,NPY1R,397547:up|ssc:100113425,BMP4,100113425:down|ssc:100169702,PROX1,100169702:down|ssc:100519335,IFT57,100519335:up	http://amigo.geneontology.org/cgi-bin/amigo/term_details?term=GO:0003007
regulation of immune effector process	Biological Process	GO:0002697	11	70	0.02527	0.188587	ssc:396900,AMCF-II,396900:down|ssc:396927,ZP3,396927:up|ssc:100155631,FES,100155631:down|ssc:100516668,RABGEF1,100516668:down|ssc:100519703,F2RL1,100519703:down|ssc:397614,IL4R,397614:down|ssc:397106,IL10,397106:down|ssc:100525094,SASH3,100525094:down|ssc:100271930,IL7R,100271930:down|ssc:397406,FCER1G,397406:down|ssc:396623,TLR2,396623:down	http://amigo.geneontology.org/cgi-bin/amigo/term_details?term=GO:0002697
regulation of transcription from RNA polymerase II promoter	Biological Process	GO:0006357	52	488	0.0252871	0.188587	ssc:100524615,ARID5A,100524615:down|ssc:100127155,LMO4,100127155:up|ssc:396628,VDR,396628:down|ssc:100152404,HEY2,100152404:down|ssc:100625349,MXD1,100625349:down|ssc:100521992,HCLS1,100521992:down|ssc:100152038,OSM,100152038:down|ssc:100170845,-,100170845:down|ssc:100153960,NR1H4,100153960:up|ssc:100518125,YBX3,100518125:up|ssc:654298,ID2,654298:down|ssc:100516663,CREB3L1,100516663:down|ssc:1000…	http://amigo.geneontology.org/cgi-bin/amigo/term_details?term=GO:0006357
extracellular matrix	Cellular Component	GO:0031012	13	88	0.0253655	0.188927	ssc:100154395,NOV,100154395:down|ssc:397102,AMBN,397102:down|ssc:100620511,CLEC3B,100620511:up|ssc:396927,ZP3,396927:up|ssc:100152401,POSTN,100152401:down|ssc:397320,MMP1,397320:down|ssc:100037275,SPARCL1,100037275:up|ssc:100153791,CYR61,100153791:down|ssc:396846,ZP2,396846:up|ssc:445513,HAPLN1,445513:up|ssc:100520218,ADAMTS9,100520218:down|ssc:397497,FGF1,397497:down|ssc:397620,FN1,397620:down	http://amigo.geneontology.org/cgi-bin/amigo/term_details?term=GO:0031012
negative regulation of RNA metabolic process	Biological Process	GO:0051253	35	307	0.0256867	0.190994	ssc:396927,ZP3,396927:up|ssc:396951,PTHLH,396951:up|ssc:396628,VDR,396628:down|ssc:100152404,HEY2,100152404:down|ssc:100625349,MXD1,100625349:down|ssc:100153176,SFRP5,100153176:down|ssc:100515035,GMNN,100515035:up|ssc:780421,CMKLR1,780421:down|ssc:100521992,HCLS1,100521992:down|ssc:100153960,NR1H4,100153960:up|ssc:100518125,YBX3,100518125:up|ssc:654298,ID2,654298:down|ssc:100156280,GREM1,10015628…	http://amigo.geneontology.org/cgi-bin/amigo/term_details?term=GO:0051253
positive regulation of gene expression	Biological Process	GO:0010628	49	456	0.0257094	0.190994	ssc:100524615,ARID5A,100524615:down|ssc:100127155,LMO4,100127155:up|ssc:396927,ZP3,396927:up|ssc:396628,VDR,396628:down|ssc:100152404,HEY2,100152404:down|ssc:396665,-,396665:down|ssc:100521992,HCLS1,100521992:down|ssc:100152038,OSM,100152038:down|ssc:100170845,-,100170845:down|ssc:100153960,NR1H4,100153960:up|ssc:654298,ID2,654298:down|ssc:100516663,CREB3L1,100516663:down|ssc:100038004,EGR2,10003…	http://amigo.geneontology.org/cgi-bin/amigo/term_details?term=GO:0010628
cellular ketone metabolic process	Biological Process	GO:0042180	9	53	0.0261149	0.193506	ssc:100270814,-,100270814:down|ssc:100286778,PDK4,100286778:down|ssc:494015,SCAP,494015:up|ssc:396816,AKR1B1,396816:down|ssc:100514142,GCK,100514142:up|ssc:100169702,PROX1,100169702:down|ssc:100153960,NR1H4,100153960:up|ssc:403330,CYP17A1,403330:down|ssc:397038,FBP1,397038:down	http://amigo.geneontology.org/cgi-bin/amigo/term_details?term=GO:0042180
lymphocyte mediated immunity	Biological Process	GO:0002449	9	53	0.0261149	0.193506	ssc:396927,ZP3,396927:up|ssc:100522387,CTSC,100522387:up|ssc:100152253,STX11,100152253:down|ssc:445528,HLA-DMA,445528:down|ssc:396969,CTSH,396969:down|ssc:100525094,SASH3,100525094:down|ssc:397406,FCER1G,397406:down|ssc:100271930,IL7R,100271930:down|ssc:100621544,RNF19B,100621544:down	http://amigo.geneontology.org/cgi-bin/amigo/term_details?term=GO:0002449
positive regulation of transcription from RNA polymerase II promoter	Biological Process	GO:0045944	34	297	0.0261918	0.193577	ssc:100524615,ARID5A,100524615:down|ssc:100127155,LMO4,100127155:up|ssc:396628,VDR,396628:down|ssc:100152404,HEY2,100152404:down|ssc:100521992,HCLS1,100521992:down|ssc:100152038,OSM,100152038:down|ssc:100170845,-,100170845:down|ssc:100153960,NR1H4,100153960:up|ssc:100516663,CREB3L1,100516663:down|ssc:100038004,EGR2,100038004:down|ssc:100156280,GREM1,100156280:down|ssc:100519275,CSRNP1,100519275:d…	http://amigo.geneontology.org/cgi-bin/amigo/term_details?term=GO:0045944
negative regulation of RNA biosynthetic process	Biological Process	GO:1902679	34	297	0.0261918	0.193577	ssc:396927,ZP3,396927:up|ssc:396951,PTHLH,396951:up|ssc:396628,VDR,396628:down|ssc:100152404,HEY2,100152404:down|ssc:100625349,MXD1,100625349:down|ssc:100153176,SFRP5,100153176:down|ssc:100515035,GMNN,100515035:up|ssc:780421,CMKLR1,780421:down|ssc:100521992,HCLS1,100521992:down|ssc:100153960,NR1H4,100153960:up|ssc:100518125,YBX3,100518125:up|ssc:654298,ID2,654298:down|ssc:100156280,GREM1,10015628…	http://amigo.geneontology.org/cgi-bin/amigo/term_details?term=GO:1902679
intrinsic component of plasma membrane	Cellular Component	GO:0031226	25	205	0.0267858	0.197577	ssc:100621502,-,100621502:up|ssc:100156430,-,100156430:down|ssc:100522873,EPHA2,100522873:down|ssc:100127483,BMPR2,100127483:down|ssc:100156959,OLFM3,100156959:up|ssc:397564,HBEGF,397564:down|ssc:100152055,NCF4,100152055:down|ssc:100521017,PLAUR,100521017:down|ssc:100518612,MFSD2A,100518612:down|ssc:100624193,LAPTM5,100624193:down|ssc:100518796,SGMS2,100518796:down|ssc:397063,ITGB3,397063:down|ss…	http://amigo.geneontology.org/cgi-bin/amigo/term_details?term=GO:0031226
protein kinase activity	Molecular Function	GO:0004672	22	175	0.0268361	0.197577	ssc:100126293,CASS4,100126293:down|ssc:100286778,PDK4,100286778:down|ssc:100522873,EPHA2,100522873:down|ssc:100627308,-,100627308:down|ssc:100127483,BMPR2,100127483:down|ssc:100156359,LIMK2,100156359:down|ssc:396665,-,396665:down|ssc:100523692,KCNH4,100523692:down|ssc:100153033,STK17B,100153033:down|ssc:100521487,WEE1,100521487:down|ssc:397201,JAK2,397201:down|ssc:100627019,ABL2,100627019:down|ss…	http://amigo.geneontology.org/cgi-bin/amigo/term_details?term=GO:0004672
regulation of protein kinase activity	Biological Process	GO:0045859	22	175	0.0268361	0.197577	ssc:396927,ZP3,396927:up|ssc:396851,PIK3R5,396851:down|ssc:100153176,SFRP5,100153176:down|ssc:100145894,JTB,100145894:up|ssc:100153791,CYR61,100153791:down|ssc:100525894,DUSP26,100525894:down|ssc:100113425,BMP4,100113425:down|ssc:397201,JAK2,397201:down|ssc:100169702,PROX1,100169702:down|ssc:100155615,AVPI1,100155615:up|ssc:100516027,SFRP2,100516027:down|ssc:100519746,DAB2,100519746:down|ssc:7336…	http://amigo.geneontology.org/cgi-bin/amigo/term_details?term=GO:0045859
regulation of kinase activity	Biological Process	GO:0043549	23	185	0.0269001	0.197795	ssc:396927,ZP3,396927:up|ssc:396851,PIK3R5,396851:down|ssc:100153176,SFRP5,100153176:down|ssc:100514958,SLAMF8,100514958:down|ssc:100145894,JTB,100145894:up|ssc:100153791,CYR61,100153791:down|ssc:100525894,DUSP26,100525894:down|ssc:100113425,BMP4,100113425:down|ssc:397201,JAK2,397201:down|ssc:100169702,PROX1,100169702:down|ssc:100155615,AVPI1,100155615:up|ssc:100516027,SFRP2,100516027:down|ssc:10…	http://amigo.geneontology.org/cgi-bin/amigo/term_details?term=GO:0043549
plasma membrane receptor complex	Cellular Component	GO:0098802	6	29	0.0270713	0.198546	ssc:396943,ITGB2,396943:down|ssc:100519746,DAB2,100519746:down|ssc:100155091,ITGA5,100155091:down|ssc:396623,TLR2,396623:down|ssc:397063,ITGB3,397063:down|ssc:100156959,OLFM3,100156959:up	http://amigo.geneontology.org/cgi-bin/amigo/term_details?term=GO:0098802
positive regulation of response to wounding	Biological Process	GO:1903036	6	29	0.0270713	0.198546	ssc:397564,HBEGF,397564:down|ssc:396927,ZP3,396927:up|ssc:100621027,CX3CL1,100621027:down|ssc:100127489,S100A9,100127489:down|ssc:396623,TLR2,396623:down|ssc:397406,FCER1G,397406:down	http://amigo.geneontology.org/cgi-bin/amigo/term_details?term=GO:1903036
hormone transport	Biological Process	GO:0009914	10	62	0.0272698	0.199271	ssc:397093,INHBA,397093:down|ssc:100738470,NDUFAF2,100738470:up|ssc:100525333,CRYM,100525333:up|ssc:100049663,EDN3,100049663:up|ssc:100522131,FKBP1B,100522131:down|ssc:399503,LIF,399503:down|ssc:100152038,OSM,100152038:down|ssc:100514142,GCK,100514142:up|ssc:100144470,PHEROC,100144470:down|ssc:100518141,C2CD2L,100518141:down	http://amigo.geneontology.org/cgi-bin/amigo/term_details?term=GO:0009914
negative regulation of cell growth	Biological Process	GO:0030308	8	45	0.027287	0.199271	ssc:100516027,SFRP2,100516027:down|ssc:397093,INHBA,397093:down|ssc:100152419,FRZB,100152419:up|ssc:100127483,BMPR2,100127483:down|ssc:100525983,DCUN1D3,100525983:down|ssc:100152462,ACVR1B,100152462:down|ssc:100525560,CDKN2D,100525560:up|ssc:397038,FBP1,397038:down	http://amigo.geneontology.org/cgi-bin/amigo/term_details?term=GO:0030308
mesenchymal cell development	Biological Process	GO:0014031	8	45	0.027287	0.199271	ssc:100516027,SFRP2,100516027:down|ssc:100519746,DAB2,100519746:down|ssc:100152404,HEY2,100152404:down|ssc:396665,-,396665:down|ssc:100156280,GREM1,100156280:down|ssc:100049663,EDN3,100049663:up|ssc:100524216,FAM101B,100524216:down|ssc:414911,EDNRB,414911:down	http://amigo.geneontology.org/cgi-bin/amigo/term_details?term=GO:0014031
negative regulation of biosynthetic process	Biological Process	GO:0009890	38	340	0.0273088	0.199271	ssc:100270814,-,100270814:down|ssc:396927,ZP3,396927:up|ssc:396951,PTHLH,396951:up|ssc:396628,VDR,396628:down|ssc:100152404,HEY2,100152404:down|ssc:100625349,MXD1,100625349:down|ssc:100153176,SFRP5,100153176:down|ssc:100515035,GMNN,100515035:up|ssc:780421,CMKLR1,780421:down|ssc:100521992,HCLS1,100521992:down|ssc:100153960,NR1H4,100153960:up|ssc:100518125,YBX3,100518125:up|ssc:654298,ID2,654298:do…	http://amigo.geneontology.org/cgi-bin/amigo/term_details?term=GO:0009890
organonitrogen compound metabolic process	Biological Process	GO:1901564	41	372	0.0274972	0.200392	ssc:396951,PTHLH,396951:up|ssc:100153460,AKAP5,100153460:down|ssc:100624445,-,100624445:down|ssc:100522855,HK3,100522855:down|ssc:397682,-,397682:up|ssc:100153094,-,100153094:up|ssc:100524418,PTGDR,100524418:down|ssc:100157902,DNPH1,100157902:up|ssc:100623036,FAH,100623036:up|ssc:100153960,NR1H4,100153960:up|ssc:102166770,-,102166770:down|ssc:100623848,EXTL1,100623848:up|ssc:100156882,FURIN,10015…	http://amigo.geneontology.org/cgi-bin/amigo/term_details?term=GO:1901564
male sex differentiation	Biological Process	GO:0046661	7	37	0.0277908	0.201517	ssc:100516027,SFRP2,100516027:down|ssc:397093,INHBA,397093:down|ssc:100622249,ARID5B,100622249:down|ssc:100520393,SPINK2,100520393:up|ssc:397024,INSL3,397024:down|ssc:397680,NR0B1,397680:up|ssc:100518125,YBX3,100518125:up	http://amigo.geneontology.org/cgi-bin/amigo/term_details?term=GO:0046661
regulation of T cell proliferation	Biological Process	GO:0042129	7	37	0.0277908	0.201517	ssc:396927,ZP3,396927:up|ssc:100516458,TNFSF18,100516458:down|ssc:100525094,SASH3,100525094:down|ssc:100113425,BMP4,100113425:down|ssc:397271,AIF1,397271:down|ssc:100038026,TNFSF13B,100038026:down|ssc:397441,CD86,397441:down	http://amigo.geneontology.org/cgi-bin/amigo/term_details?term=GO:0042129
positive regulation of peptidyl-tyrosine phosphorylation	Biological Process	GO:0050731	7	37	0.0277908	0.201517	ssc:100521992,HCLS1,100521992:down|ssc:100152038,OSM,100152038:down|ssc:399503,LIF,399503:down|ssc:100155091,ITGA5,100155091:down|ssc:397201,JAK2,397201:down|ssc:100517086,CSF1R,100517086:down|ssc:100156280,GREM1,100156280:down	http://amigo.geneontology.org/cgi-bin/amigo/term_details?term=GO:0050731
rhythmic process	Biological Process	GO:0048511	11	71	0.0277919	0.201517	ssc:397093,INHBA,397093:down|ssc:396927,ZP3,396927:up|ssc:654298,ID2,654298:down|ssc:100038004,EGR2,100038004:down|ssc:397495,BDNF,397495:down|ssc:397209,GFPT1,397209:down|ssc:100513746,NOCT,100513746:down|ssc:100522839,ID1,100522839:up|ssc:595123,NAMPT,595123:up|ssc:100519685,NAGLU,100519685:down|ssc:100169702,PROX1,100169702:down	http://amigo.geneontology.org/cgi-bin/amigo/term_details?term=GO:0048511
single-multicellular organism process	Biological Process	GO:0044707	166	1797	0.0283057	0.204984	ssc:100286778,PDK4,100286778:down|ssc:397122,IL1B1,397122:down|ssc:100621027,CX3CL1,100621027:down|ssc:100622059,KCTD11,100622059:down|ssc:100624677,HNMT,100624677:down|ssc:100152404,HEY2,100152404:down|ssc:396665,-,396665:down|ssc:780421,CMKLR1,780421:down|ssc:100622220,SLC25A38,100622220:up|ssc:100521487,WEE1,100521487:down|ssc:396915,EDN1,396915:down|ssc:397620,FN1,397620:down|ssc:100519335,IF…	http://amigo.geneontology.org/cgi-bin/amigo/term_details?term=GO:0044707
positive regulation of interleukin-6 production	Biological Process	GO:0032755	4	15	0.0290019	0.206116	ssc:100627693,RAB7B,100627693:down|ssc:100519703,F2RL1,100519703:down|ssc:396623,TLR2,396623:down|ssc:397406,FCER1G,397406:down	http://amigo.geneontology.org/cgi-bin/amigo/term_details?term=GO:0032755
polysome	Cellular Component	GO:0005844	4	15	0.0290019	0.206116	ssc:100519109,NUFIP2,100519109:down|ssc:100522458,LARP4B,100522458:down|ssc:397680,NR0B1,397680:up|ssc:100518125,YBX3,100518125:up	http://amigo.geneontology.org/cgi-bin/amigo/term_details?term=GO:0005844
cardiac muscle cell development	Biological Process	GO:0055013	4	15	0.0290019	0.206116	ssc:100155958,SRF,100155958:down|ssc:100113425,BMP4,100113425:down|ssc:100169702,PROX1,100169702:down|ssc:100152404,HEY2,100152404:down	http://amigo.geneontology.org/cgi-bin/amigo/term_details?term=GO:0055013
positive regulation of production of molecular mediator of immune response	Biological Process	GO:0002702	4	15	0.0290019	0.206116	ssc:100519703,F2RL1,100519703:down|ssc:100525094,SASH3,100525094:down|ssc:396623,TLR2,396623:down|ssc:397406,FCER1G,397406:down	http://amigo.geneontology.org/cgi-bin/amigo/term_details?term=GO:0002702
axis elongation	Biological Process	GO:0003401	4	15	0.0290019	0.206116	ssc:100516027,SFRP2,100516027:down|ssc:100113425,BMP4,100113425:down|ssc:397497,FGF1,397497:down|ssc:100153176,SFRP5,100153176:down	http://amigo.geneontology.org/cgi-bin/amigo/term_details?term=GO:0003401
developmental programmed cell death	Biological Process	GO:0010623	4	15	0.0290019	0.206116	ssc:100153791,CYR61,100153791:down|ssc:397094,IL1A,397094:down|ssc:396628,VDR,396628:down|ssc:397495,BDNF,397495:down	http://amigo.geneontology.org/cgi-bin/amigo/term_details?term=GO:0010623
endoplasmic reticulum unfolded protein response	Biological Process	GO:0030968	4	15	0.0290019	0.206116	ssc:100520400,YOD1,100520400:down|ssc:396667,PTPN1,396667:down|ssc:100516663,CREB3L1,100516663:down|ssc:100522679,PPP1R15A,100522679:down	http://amigo.geneontology.org/cgi-bin/amigo/term_details?term=GO:0030968
positive regulation of tyrosine phosphorylation of STAT protein	Biological Process	GO:0042531	4	15	0.0290019	0.206116	ssc:100521992,HCLS1,100521992:down|ssc:399503,LIF,399503:down|ssc:397201,JAK2,397201:down|ssc:100517086,CSF1R,100517086:down	http://amigo.geneontology.org/cgi-bin/amigo/term_details?term=GO:0042531
activin receptor signaling pathway	Biological Process	GO:0032924	4	15	0.0290019	0.206116	ssc:100521305,SMAD7,100521305:down|ssc:397093,INHBA,397093:down|ssc:100152462,ACVR1B,100152462:down|ssc:396665,-,396665:down	http://amigo.geneontology.org/cgi-bin/amigo/term_details?term=GO:0032924
interleukin-2 production	Biological Process	GO:0032623	4	15	0.0290019	0.206116	ssc:397094,IL1A,397094:down|ssc:100525094,SASH3,100525094:down|ssc:100620216,-,100620216:down|ssc:100627019,ABL2,100627019:down	http://amigo.geneontology.org/cgi-bin/amigo/term_details?term=GO:0032623
negative regulation of cytokine production	Biological Process	GO:0001818	9	54	0.029162	0.206116	ssc:397649,LTF,397649:up|ssc:100515612,C5AR2,100515612:down|ssc:100154350,NFKBIL1,100154350:up|ssc:100156882,FURIN,100156882:down|ssc:100516668,RABGEF1,100516668:down|ssc:780421,CMKLR1,780421:down|ssc:100519703,F2RL1,100519703:down|ssc:397106,IL10,397106:down|ssc:396623,TLR2,396623:down	http://amigo.geneontology.org/cgi-bin/amigo/term_details?term=GO:0001818
cellular modified amino acid metabolic process	Biological Process	GO:0006575	9	54	0.029162	0.206116	ssc:100521480,GSTK1,100521480:up|ssc:100525333,CRYM,100525333:up|ssc:100624445,-,100624445:down|ssc:397682,-,397682:up|ssc:397246,VNN1,397246:up|ssc:100522018,GCLC,100522018:down|ssc:100153094,-,100153094:up|ssc:100126844,GATM,100126844:up|ssc:100518180,GCNT4,100518180:down	http://amigo.geneontology.org/cgi-bin/amigo/term_details?term=GO:0006575
positive regulation of growth	Biological Process	GO:0045927	9	54	0.029162	0.206116	ssc:100516027,SFRP2,100516027:down|ssc:396927,ZP3,396927:up|ssc:100127483,BMPR2,100127483:down|ssc:100152404,HEY2,100152404:down|ssc:100155958,SRF,100155958:down|ssc:100525094,SASH3,100525094:down|ssc:100169702,PROX1,100169702:down|ssc:397620,FN1,397620:down|ssc:100518125,YBX3,100518125:up	http://amigo.geneontology.org/cgi-bin/amigo/term_details?term=GO:0045927
chemical homeostasis	Biological Process	GO:0048878	27	227	0.0292033	0.206116	ssc:100270814,-,100270814:down|ssc:100286778,PDK4,100286778:down|ssc:414375,XCR1,414375:down|ssc:396951,PTHLH,396951:up|ssc:396628,VDR,396628:down|ssc:100514958,SLAMF8,100514958:down|ssc:100514142,GCK,100514142:up|ssc:100155958,SRF,100155958:down|ssc:414371,CCR5,414371:down|ssc:100156133,SLC35G1,100156133:down|ssc:100627019,ABL2,100627019:down|ssc:397649,LTF,397649:up|ssc:100738470,NDUFAF2,100738…	http://amigo.geneontology.org/cgi-bin/amigo/term_details?term=GO:0048878
intramolecular oxidoreductase activity	Molecular Function	GO:0016860	5	22	0.0292147	0.206116	ssc:100038014,RPIA,100038014:down|ssc:100312968,EBP,100312968:up|ssc:100620325,-,100620325:down|ssc:397112,TBXAS1,397112:down|ssc:100739304,-,100739304:up	http://amigo.geneontology.org/cgi-bin/amigo/term_details?term=GO:0016860
positive regulation of neuron projection development	Biological Process	GO:0010976	5	22	0.0292147	0.206116	ssc:100155958,SRF,100155958:down|ssc:100155631,FES,100155631:down|ssc:100127483,BMPR2,100127483:down|ssc:397620,FN1,397620:down|ssc:100627019,ABL2,100627019:down	http://amigo.geneontology.org/cgi-bin/amigo/term_details?term=GO:0010976
phosphatidylinositol 3-kinase signaling	Biological Process	GO:0014065	5	22	0.0292147	0.206116	ssc:100519703,F2RL1,100519703:down|ssc:100521992,HCLS1,100521992:down|ssc:396851,PIK3R5,396851:down|ssc:100523837,PRR5L,100523837:down|ssc:100516729,STAMBP,100516729:down	http://amigo.geneontology.org/cgi-bin/amigo/term_details?term=GO:0014065
B cell proliferation	Biological Process	GO:0042100	5	22	0.0292147	0.206116	ssc:100134969,NFATC2,100134969:down|ssc:397106,IL10,397106:down|ssc:100525094,SASH3,100525094:down|ssc:100038026,TNFSF13B,100038026:down|ssc:100271930,IL7R,100271930:down	http://amigo.geneontology.org/cgi-bin/amigo/term_details?term=GO:0042100
regulation of interferon-gamma production	Biological Process	GO:0032649	5	22	0.0292147	0.206116	ssc:396927,ZP3,396927:up|ssc:397106,IL10,397106:down|ssc:100525094,SASH3,100525094:down|ssc:100620216,-,100620216:down|ssc:100627019,ABL2,100627019:down	http://amigo.geneontology.org/cgi-bin/amigo/term_details?term=GO:0032649
negative regulation of canonical Wnt signaling pathway	Biological Process	GO:0090090	5	22	0.0292147	0.206116	ssc:100516027,SFRP2,100516027:down|ssc:100152419,FRZB,100152419:up|ssc:100519746,DAB2,100519746:down|ssc:100156280,GREM1,100156280:down|ssc:100153176,SFRP5,100153176:down	http://amigo.geneontology.org/cgi-bin/amigo/term_details?term=GO:0090090
mesoderm formation	Biological Process	GO:0001707	5	22	0.0292147	0.206116	ssc:100516027,SFRP2,100516027:down|ssc:100522873,EPHA2,100522873:down|ssc:100155958,SRF,100155958:down|ssc:100127483,BMPR2,100127483:down|ssc:100113425,BMP4,100113425:down	http://amigo.geneontology.org/cgi-bin/amigo/term_details?term=GO:0001707
positive regulation of kinase activity	Biological Process	GO:0033674	14	99	0.0292698	0.206252	ssc:396927,ZP3,396927:up|ssc:396851,PIK3R5,396851:down|ssc:100519746,DAB2,100519746:down|ssc:396865,CHI3L1,396865:down|ssc:100517086,CSF1R,100517086:down|ssc:100156280,GREM1,100156280:down|ssc:100520599,FAM58A,100520599:up|ssc:100049663,EDN3,100049663:up|ssc:100145894,JTB,100145894:up|ssc:100153791,CYR61,100153791:down|ssc:100113425,BMP4,100113425:down|ssc:397201,JAK2,397201:down|ssc:100169702,PR…	http://amigo.geneontology.org/cgi-bin/amigo/term_details?term=GO:0033674
membrane	Cellular Component	GO:0016020	222	2468	0.0294172	0.207037	ssc:100519446,PLD1,100519446:down|ssc:100286778,PDK4,100286778:down|ssc:100621027,CX3CL1,100621027:down|ssc:396851,PIK3R5,396851:down|ssc:100621675,-,100621675:down|ssc:396665,-,396665:down|ssc:100145894,JTB,100145894:up|ssc:397186,-,397186:down|ssc:780421,CMKLR1,780421:down|ssc:733605,NDUFB6,733605:up|ssc:100622220,SLC25A38,100622220:up|ssc:102158732,-,102158732:down|ssc:100037292,ACKR4,10003729…	http://amigo.geneontology.org/cgi-bin/amigo/term_details?term=GO:0016020
integral component of plasma membrane	Cellular Component	GO:0005887	24	197	0.0299323	0.210405	ssc:100621502,-,100621502:up|ssc:100156430,-,100156430:down|ssc:100522873,EPHA2,100522873:down|ssc:100127483,BMPR2,100127483:down|ssc:100156959,OLFM3,100156959:up|ssc:397564,HBEGF,397564:down|ssc:100152055,NCF4,100152055:down|ssc:100521017,PLAUR,100521017:down|ssc:100518612,MFSD2A,100518612:down|ssc:100624193,LAPTM5,100624193:down|ssc:100518796,SGMS2,100518796:down|ssc:397063,ITGB3,397063:down|ss…	http://amigo.geneontology.org/cgi-bin/amigo/term_details?term=GO:0005887
circadian rhythm	Biological Process	GO:0007623	8	46	0.030764	0.215057	ssc:654298,ID2,654298:down|ssc:397495,BDNF,397495:down|ssc:397209,GFPT1,397209:down|ssc:100522839,ID1,100522839:up|ssc:595123,NAMPT,595123:up|ssc:100513746,NOCT,100513746:down|ssc:100169702,PROX1,100169702:down|ssc:100519685,NAGLU,100519685:down	http://amigo.geneontology.org/cgi-bin/amigo/term_details?term=GO:0007623
positive regulation of innate immune response	Biological Process	GO:0045089	8	46	0.030764	0.215057	ssc:399541,TLR4,399541:down|ssc:100627693,RAB7B,100627693:down|ssc:100038025,CLEC7A,100038025:down|ssc:100154350,NFKBIL1,100154350:up|ssc:100519703,F2RL1,100519703:down|ssc:396623,TLR2,396623:down|ssc:397441,CD86,397441:down|ssc:100521986,MAPKAPK2,100521986:down	http://amigo.geneontology.org/cgi-bin/amigo/term_details?term=GO:0045089
negative regulation of macromolecule biosynthetic process	Biological Process	GO:0010558	36	322	0.0310331	0.215057	ssc:396927,ZP3,396927:up|ssc:396951,PTHLH,396951:up|ssc:396628,VDR,396628:down|ssc:100152404,HEY2,100152404:down|ssc:100625349,MXD1,100625349:down|ssc:100153176,SFRP5,100153176:down|ssc:100515035,GMNN,100515035:up|ssc:780421,CMKLR1,780421:down|ssc:100521992,HCLS1,100521992:down|ssc:100153960,NR1H4,100153960:up|ssc:100518125,YBX3,100518125:up|ssc:654298,ID2,654298:down|ssc:100156280,GREM1,10015628…	http://amigo.geneontology.org/cgi-bin/amigo/term_details?term=GO:0010558
transcription from RNA polymerase II promoter	Biological Process	GO:0006366	53	505	0.0310456	0.215057	ssc:100524615,ARID5A,100524615:down|ssc:100127155,LMO4,100127155:up|ssc:396628,VDR,396628:down|ssc:100152404,HEY2,100152404:down|ssc:100625349,MXD1,100625349:down|ssc:100521992,HCLS1,100521992:down|ssc:100152038,OSM,100152038:down|ssc:100170845,-,100170845:down|ssc:100153960,NR1H4,100153960:up|ssc:100518125,YBX3,100518125:up|ssc:654298,ID2,654298:down|ssc:100516663,CREB3L1,100516663:down|ssc:1000…	http://amigo.geneontology.org/cgi-bin/amigo/term_details?term=GO:0006366
regulation of insulin secretion involved in cellular response to glucose stimulus	Biological Process	GO:0061178	3	9	0.0313048	0.215057	ssc:100738470,NDUFAF2,100738470:up|ssc:100522131,FKBP1B,100522131:down|ssc:100518141,C2CD2L,100518141:down	http://amigo.geneontology.org/cgi-bin/amigo/term_details?term=GO:0061178
rhythmic behavior	Biological Process	GO:0007622	3	9	0.0313048	0.215057	ssc:654298,ID2,654298:down|ssc:100519685,NAGLU,100519685:down|ssc:100038004,EGR2,100038004:down	http://amigo.geneontology.org/cgi-bin/amigo/term_details?term=GO:0007622
mesenchymal to epithelial transition	Biological Process	GO:0060231	3	9	0.0313048	0.215057	ssc:399503,LIF,399503:down|ssc:100113425,BMP4,100113425:down|ssc:100156280,GREM1,100156280:down	http://amigo.geneontology.org/cgi-bin/amigo/term_details?term=GO:0060231
interleukin-8 secretion	Biological Process	GO:0072606	3	9	0.0313048	0.215057	ssc:100519703,F2RL1,100519703:down|ssc:396865,CHI3L1,396865:down|ssc:100515612,C5AR2,100515612:down	http://amigo.geneontology.org/cgi-bin/amigo/term_details?term=GO:0072606
defense response to Gram-negative bacterium	Biological Process	GO:0050829	3	9	0.0313048	0.215057	ssc:399541,TLR4,399541:down|ssc:396900,AMCF-II,396900:down|ssc:100519703,F2RL1,100519703:down	http://amigo.geneontology.org/cgi-bin/amigo/term_details?term=GO:0050829
cell migration involved in sprouting angiogenesis	Biological Process	GO:0002042	3	9	0.0313048	0.215057	ssc:100155958,SRF,100155958:down|ssc:100516296,EGR3,100516296:down|ssc:100156280,GREM1,100156280:down	http://amigo.geneontology.org/cgi-bin/amigo/term_details?term=GO:0002042
macrophage chemotaxis	Biological Process	GO:0048246	3	9	0.0313048	0.215057	ssc:780421,CMKLR1,780421:down|ssc:100621027,CX3CL1,100621027:down|ssc:414911,EDNRB,414911:down	http://amigo.geneontology.org/cgi-bin/amigo/term_details?term=GO:0048246
negative regulation of neural precursor cell proliferation	Biological Process	GO:2000178	3	9	0.0313048	0.215057	ssc:100622059,KCTD11,100622059:down|ssc:654298,ID2,654298:down|ssc:397495,BDNF,397495:down	http://amigo.geneontology.org/cgi-bin/amigo/term_details?term=GO:2000178
metanephric nephron morphogenesis	Biological Process	GO:0072273	3	9	0.0313048	0.215057	ssc:399503,LIF,399503:down|ssc:100113425,BMP4,100113425:down|ssc:100156280,GREM1,100156280:down	http://amigo.geneontology.org/cgi-bin/amigo/term_details?term=GO:0072273
positive regulation of endothelial cell migration	Biological Process	GO:0010595	3	9	0.0313048	0.215057	ssc:100127483,BMPR2,100127483:down|ssc:100113425,BMP4,100113425:down|ssc:100169702,PROX1,100169702:down	http://amigo.geneontology.org/cgi-bin/amigo/term_details?term=GO:0010595
positive regulation of exocytosis	Biological Process	GO:0045921	3	9	0.0313048	0.215057	ssc:100519703,F2RL1,100519703:down|ssc:396927,ZP3,396927:up|ssc:397406,FCER1G,397406:down	http://amigo.geneontology.org/cgi-bin/amigo/term_details?term=GO:0045921
negative regulation of blood circulation	Biological Process	GO:1903523	3	9	0.0313048	0.215057	ssc:396724,OLR1,396724:down|ssc:100522131,FKBP1B,100522131:down|ssc:100127483,BMPR2,100127483:down	http://amigo.geneontology.org/cgi-bin/amigo/term_details?term=GO:1903523
organic cation transmembrane transporter activity	Molecular Function	GO:0015101	3	9	0.0313048	0.215057	ssc:100516960,SLC12A2,100516960:down|ssc:100142677,SLC22A3,100142677:down|ssc:100152140,SLC44A1,100152140:up	http://amigo.geneontology.org/cgi-bin/amigo/term_details?term=GO:0015101
epiboly	Biological Process	GO:0090504	3	9	0.0313048	0.215057	ssc:397564,HBEGF,397564:down|ssc:100153791,CYR61,100153791:down|ssc:100155091,ITGA5,100155091:down	http://amigo.geneontology.org/cgi-bin/amigo/term_details?term=GO:0090504
bile acid metabolic process	Biological Process	GO:0008206	3	9	0.0313048	0.215057	ssc:100169702,PROX1,100169702:down|ssc:100152963,PEX2,100152963:up|ssc:100153960,NR1H4,100153960:up	http://amigo.geneontology.org/cgi-bin/amigo/term_details?term=GO:0008206
positive regulation of nucleic acid-templated transcription	Biological Process	GO:1903508	43	397	0.0315094	0.215454	ssc:100524615,ARID5A,100524615:down|ssc:100127155,LMO4,100127155:up|ssc:396927,ZP3,396927:up|ssc:396628,VDR,396628:down|ssc:100152404,HEY2,100152404:down|ssc:396665,-,396665:down|ssc:100521992,HCLS1,100521992:down|ssc:100152038,OSM,100152038:down|ssc:100170845,-,100170845:down|ssc:100153960,NR1H4,100153960:up|ssc:654298,ID2,654298:down|ssc:100516663,CREB3L1,100516663:down|ssc:100038004,EGR2,10003…	http://amigo.geneontology.org/cgi-bin/amigo/term_details?term=GO:1903508
positive regulation of transcription, DNA-templated	Biological Process	GO:0045893	43	397	0.0315094	0.215454	ssc:100524615,ARID5A,100524615:down|ssc:100127155,LMO4,100127155:up|ssc:396927,ZP3,396927:up|ssc:396628,VDR,396628:down|ssc:100152404,HEY2,100152404:down|ssc:396665,-,396665:down|ssc:100521992,HCLS1,100521992:down|ssc:100152038,OSM,100152038:down|ssc:100170845,-,100170845:down|ssc:100153960,NR1H4,100153960:up|ssc:654298,ID2,654298:down|ssc:100516663,CREB3L1,100516663:down|ssc:100038004,EGR2,10003…	http://amigo.geneontology.org/cgi-bin/amigo/term_details?term=GO:0045893
kidney morphogenesis	Biological Process	GO:0060993	6	30	0.0315874	0.215454	ssc:399503,LIF,399503:down|ssc:100113425,BMP4,100113425:down|ssc:100157004,GCNT1,100157004:down|ssc:397497,FGF1,397497:down|ssc:100156280,GREM1,100156280:down|ssc:100518180,GCNT4,100518180:down	http://amigo.geneontology.org/cgi-bin/amigo/term_details?term=GO:0060993
regulation of steroid metabolic process	Biological Process	GO:0019218	6	30	0.0315874	0.215454	ssc:494015,SCAP,494015:up|ssc:396628,VDR,396628:down|ssc:100169702,PROX1,100169702:down|ssc:397497,FGF1,397497:down|ssc:100152963,PEX2,100152963:up|ssc:100153960,NR1H4,100153960:up	http://amigo.geneontology.org/cgi-bin/amigo/term_details?term=GO:0019218
acute inflammatory response	Biological Process	GO:0002526	6	30	0.0315874	0.215454	ssc:397246,VNN1,397246:up|ssc:733603,-,733603:up|ssc:397094,IL1A,397094:down|ssc:397122,IL1B1,397122:down|ssc:396927,ZP3,396927:up|ssc:397406,FCER1G,397406:down	http://amigo.geneontology.org/cgi-bin/amigo/term_details?term=GO:0002526
epithelial to mesenchymal transition	Biological Process	GO:0001837	6	30	0.0315874	0.215454	ssc:100516027,SFRP2,100516027:down|ssc:100524216,FAM101B,100524216:down|ssc:100519746,DAB2,100519746:down|ssc:100152404,HEY2,100152404:down|ssc:396665,-,396665:down|ssc:100156280,GREM1,100156280:down	http://amigo.geneontology.org/cgi-bin/amigo/term_details?term=GO:0001837
production of molecular mediator of immune response	Biological Process	GO:0002440	7	38	0.0317597	0.216116	ssc:100519703,F2RL1,100519703:down|ssc:397106,IL10,397106:down|ssc:100525094,SASH3,100525094:down|ssc:100038026,TNFSF13B,100038026:down|ssc:100271930,IL7R,100271930:down|ssc:396623,TLR2,396623:down|ssc:397406,FCER1G,397406:down	http://amigo.geneontology.org/cgi-bin/amigo/term_details?term=GO:0002440
regulation of protein import into nucleus	Biological Process	GO:0042306	7	38	0.0317597	0.216116	ssc:100516027,SFRP2,100516027:down|ssc:100521992,HCLS1,100521992:down|ssc:100519746,DAB2,100519746:down|ssc:100113425,BMP4,100113425:down|ssc:396623,TLR2,396623:down|ssc:100156280,GREM1,100156280:down|ssc:100153176,SFRP5,100153176:down	http://amigo.geneontology.org/cgi-bin/amigo/term_details?term=GO:0042306
carbohydrate derivative binding	Molecular Function	GO:0097367	62	605	0.0319678	0.217275	ssc:100286778,PDK4,100286778:down|ssc:100522873,EPHA2,100522873:down|ssc:100627308,-,100627308:down|ssc:100621675,-,100621675:down|ssc:100522855,HK3,100522855:down|ssc:396665,-,396665:down|ssc:100048958,GNA14,100048958:down|ssc:100736584,TUBB4A,100736584:down|ssc:396806,BSP1,396806:up|ssc:100521487,WEE1,100521487:down|ssc:397201,JAK2,397201:down|ssc:100620216,-,100620216:down|ssc:100627019,ABL2,1…	http://amigo.geneontology.org/cgi-bin/amigo/term_details?term=GO:0097367
regulation of cysteine-type endopeptidase activity	Biological Process	GO:2000116	9	55	0.0324496	0.22003	ssc:100516027,SFRP2,100516027:down|ssc:100127489,S100A9,100127489:down|ssc:100513283,APAF1,100513283:down|ssc:100153791,CYR61,100153791:down|ssc:396969,CTSH,396969:down|ssc:100627352,FAM162A,100627352:up|ssc:100155050,MGMT,100155050:up|ssc:100525560,CDKN2D,100525560:up|ssc:100519335,IFT57,100519335:up	http://amigo.geneontology.org/cgi-bin/amigo/term_details?term=GO:2000116
regulation of cysteine-type endopeptidase activity involved in apoptotic process	Biological Process	GO:0043281	9	55	0.0324496	0.22003	ssc:100516027,SFRP2,100516027:down|ssc:100127489,S100A9,100127489:down|ssc:100513283,APAF1,100513283:down|ssc:100153791,CYR61,100153791:down|ssc:396969,CTSH,396969:down|ssc:100627352,FAM162A,100627352:up|ssc:100155050,MGMT,100155050:up|ssc:100525560,CDKN2D,100525560:up|ssc:100519335,IFT57,100519335:up	http://amigo.geneontology.org/cgi-bin/amigo/term_details?term=GO:0043281
positive regulation of RNA biosynthetic process	Biological Process	GO:1902680	43	398	0.0326828	0.22135	ssc:100524615,ARID5A,100524615:down|ssc:100127155,LMO4,100127155:up|ssc:396927,ZP3,396927:up|ssc:396628,VDR,396628:down|ssc:100152404,HEY2,100152404:down|ssc:396665,-,396665:down|ssc:100521992,HCLS1,100521992:down|ssc:100152038,OSM,100152038:down|ssc:100170845,-,100170845:down|ssc:100153960,NR1H4,100153960:up|ssc:654298,ID2,654298:down|ssc:100516663,CREB3L1,100516663:down|ssc:100038004,EGR2,10003…	http://amigo.geneontology.org/cgi-bin/amigo/term_details?term=GO:1902680
exocytosis	Biological Process	GO:0006887	11	73	0.0333701	0.223371	ssc:396927,ZP3,396927:up|ssc:100155631,FES,100155631:down|ssc:100511161,PLA2G3,100511161:down|ssc:100302703,CCL8,100302703:down|ssc:414374,CCR1,414374:down|ssc:100152253,STX11,100152253:down|ssc:100524561,PPBP,100524561:down|ssc:100516668,RABGEF1,100516668:down|ssc:100519703,F2RL1,100519703:down|ssc:100512352,LIN7B,100512352:up|ssc:397406,FCER1G,397406:down	http://amigo.geneontology.org/cgi-bin/amigo/term_details?term=GO:0006887
cellular response to oxygen-containing compound	Biological Process	GO:1901701	20	159	0.0335548	0.223371	ssc:399541,TLR4,399541:down|ssc:100286778,PDK4,100286778:down|ssc:396628,VDR,396628:down|ssc:100154350,NFKBIL1,100154350:up|ssc:414371,CCR5,414371:down|ssc:100524418,PTGDR,100524418:down|ssc:397201,JAK2,397201:down|ssc:100620216,-,100620216:down|ssc:100153960,NR1H4,100153960:up|ssc:100627019,ABL2,100627019:down|ssc:100154394,ROMO1,100154394:up|ssc:100127164,PTGER2,100127164:down|ssc:397649,LTF,39…	http://amigo.geneontology.org/cgi-bin/amigo/term_details?term=GO:1901701
small GTPase mediated signal transduction	Biological Process	GO:0007264	21	169	0.0336324	0.223371	ssc:100627693,RAB7B,100627693:down|ssc:100621675,-,100621675:down|ssc:100513761,RASL10A,100513761:down|ssc:100516668,RABGEF1,100516668:down|ssc:100154195,-,100154195:down|ssc:100522109,ELMO1,100522109:down|ssc:100627019,ABL2,100627019:down|ssc:404772,GEM,404772:down|ssc:100270722,ARF5,100270722:up|ssc:100514585,RAB3B,100514585:down|ssc:100514255,-,100514255:down|ssc:100516729,STAMBP,100516729:dow…	http://amigo.geneontology.org/cgi-bin/amigo/term_details?term=GO:0007264
lipid metabolic process	Biological Process	GO:0006629	32	282	0.0338753	0.223371	ssc:100286778,PDK4,100286778:down|ssc:100155399,PNLIPRP1,100155399:up|ssc:396927,ZP3,396927:up|ssc:396851,PIK3R5,396851:down|ssc:396628,VDR,396628:down|ssc:100170845,-,100170845:down|ssc:403330,CYP17A1,403330:down|ssc:100153960,NR1H4,100153960:up|ssc:100158115,ACOT4,100158115:up|ssc:100147712,HSD17B1,100147712:down|ssc:397082,DHRS4,397082:down|ssc:654298,ID2,654298:down|ssc:100739304,-,100739304:…	http://amigo.geneontology.org/cgi-bin/amigo/term_details?term=GO:0006629
single-organism transport	Biological Process	GO:0044765	92	945	0.0340395	0.223371	ssc:100153460,AKAP5,100153460:down|ssc:100153176,SFRP5,100153176:down|ssc:397186,-,397186:down|ssc:100152038,OSM,100152038:down|ssc:102158732,-,102158732:down|ssc:100518612,MFSD2A,100518612:down|ssc:100144470,PHEROC,100144470:down|ssc:100519335,IFT57,100519335:up|ssc:100517086,CSF1R,100517086:down|ssc:100038004,EGR2,100038004:down|ssc:100624458,ANKH,100624458:down|ssc:100049663,EDN3,100049663:up|…	http://amigo.geneontology.org/cgi-bin/amigo/term_details?term=GO:0044765
heart process	Biological Process	GO:0003015	8	47	0.0345332	0.223371	ssc:100621502,-,100621502:up|ssc:733670,RGS2,733670:up|ssc:100152404,HEY2,100152404:down|ssc:100049663,EDN3,100049663:up|ssc:100521305,SMAD7,100521305:down|ssc:397564,HBEGF,397564:down|ssc:100623651,DSC2,100623651:down|ssc:100522131,FKBP1B,100522131:down	http://amigo.geneontology.org/cgi-bin/amigo/term_details?term=GO:0003015
heart contraction	Biological Process	GO:0060047	8	47	0.0345332	0.223371	ssc:100621502,-,100621502:up|ssc:733670,RGS2,733670:up|ssc:100152404,HEY2,100152404:down|ssc:100049663,EDN3,100049663:up|ssc:100521305,SMAD7,100521305:down|ssc:397564,HBEGF,397564:down|ssc:100623651,DSC2,100623651:down|ssc:100522131,FKBP1B,100522131:down	http://amigo.geneontology.org/cgi-bin/amigo/term_details?term=GO:0060047
hematopoietic progenitor cell differentiation	Biological Process	GO:0002244	8	47	0.0345332	0.223371	ssc:100519098,SAMD9,100519098:down|ssc:100627693,RAB7B,100627693:down|ssc:397093,INHBA,397093:down|ssc:100154489,WDR38,100154489:up|ssc:100524095,PLD4,100524095:down|ssc:100513373,THSD1,100513373:down|ssc:100155958,SRF,100155958:down|ssc:100113425,BMP4,100113425:down	http://amigo.geneontology.org/cgi-bin/amigo/term_details?term=GO:0002244
activation of cysteine-type endopeptidase activity	Biological Process	GO:0097202	5	23	0.0349071	0.223371	ssc:396969,CTSH,396969:down|ssc:100627352,FAM162A,100627352:up|ssc:100127489,S100A9,100127489:down|ssc:100513283,APAF1,100513283:down|ssc:100519335,IFT57,100519335:up	http://amigo.geneontology.org/cgi-bin/amigo/term_details?term=GO:0097202
osteoclast differentiation	Biological Process	GO:0030316	5	23	0.0349071	0.223371	ssc:397649,LTF,397649:up|ssc:100522873,EPHA2,100522873:down|ssc:397405,TYROBP,397405:down|ssc:100517086,CSF1R,100517086:down|ssc:414374,CCR1,414374:down	http://amigo.geneontology.org/cgi-bin/amigo/term_details?term=GO:0030316
regulation of endothelial cell migration	Biological Process	GO:0010594	5	23	0.0349071	0.223371	ssc:100522873,EPHA2,100522873:down|ssc:100127483,BMPR2,100127483:down|ssc:100113425,BMP4,100113425:down|ssc:100169702,PROX1,100169702:down|ssc:100511141,VASH1,100511141:down	http://amigo.geneontology.org/cgi-bin/amigo/term_details?term=GO:0010594
protease binding	Molecular Function	GO:0002020	5	23	0.0349071	0.223371	ssc:100127147,SELL,100127147:down|ssc:100156882,FURIN,100156882:down|ssc:397620,FN1,397620:down|ssc:397492,DPP4,397492:down|ssc:397024,INSL3,397024:down	http://amigo.geneontology.org/cgi-bin/amigo/term_details?term=GO:0002020
mammary gland epithelium development	Biological Process	GO:0061180	5	23	0.0349071	0.223371	ssc:100516960,SLC12A2,100516960:down|ssc:100522873,EPHA2,100522873:down|ssc:396951,PTHLH,396951:up|ssc:396628,VDR,396628:down|ssc:654298,ID2,654298:down	http://amigo.geneontology.org/cgi-bin/amigo/term_details?term=GO:0061180
cardiac septum morphogenesis	Biological Process	GO:0060411	5	23	0.0349071	0.223371	ssc:100153791,CYR61,100153791:down|ssc:100521305,SMAD7,100521305:down|ssc:654298,ID2,654298:down|ssc:100169702,PROX1,100169702:down|ssc:100152404,HEY2,100152404:down	http://amigo.geneontology.org/cgi-bin/amigo/term_details?term=GO:0060411
extrinsic component of cytoplasmic side of plasma membrane	Cellular Component	GO:0031234	5	23	0.0349071	0.223371	ssc:100627308,-,100627308:down|ssc:100155631,FES,100155631:down|ssc:100517988,-,100517988:down|ssc:100048958,GNA14,100048958:down|ssc:100627019,ABL2,100627019:down	http://amigo.geneontology.org/cgi-bin/amigo/term_details?term=GO:0031234
activation of cysteine-type endopeptidase activity involved in apoptotic process	Biological Process	GO:0006919	5	23	0.0349071	0.223371	ssc:396969,CTSH,396969:down|ssc:100627352,FAM162A,100627352:up|ssc:100127489,S100A9,100127489:down|ssc:100513283,APAF1,100513283:down|ssc:100519335,IFT57,100519335:up	http://amigo.geneontology.org/cgi-bin/amigo/term_details?term=GO:0006919
cellular response to tumor necrosis factor	Biological Process	GO:0071356	5	23	0.0349071	0.223371	ssc:100519703,F2RL1,100519703:down|ssc:100516458,TNFSF18,100516458:down|ssc:100152077,KRT8,100152077:down|ssc:396865,CHI3L1,396865:down|ssc:100518125,YBX3,100518125:up	http://amigo.geneontology.org/cgi-bin/amigo/term_details?term=GO:0071356
mesoderm morphogenesis	Biological Process	GO:0048332	5	23	0.0349071	0.223371	ssc:100516027,SFRP2,100516027:down|ssc:100522873,EPHA2,100522873:down|ssc:100155958,SRF,100155958:down|ssc:100127483,BMPR2,100127483:down|ssc:100113425,BMP4,100113425:down	http://amigo.geneontology.org/cgi-bin/amigo/term_details?term=GO:0048332
membrane part	Cellular Component	GO:0044425	161	1749	0.0349954	0.223371	ssc:100621027,CX3CL1,100621027:down|ssc:396851,PIK3R5,396851:down|ssc:396665,-,396665:down|ssc:100145894,JTB,100145894:up|ssc:397186,-,397186:down|ssc:780421,CMKLR1,780421:down|ssc:733605,NDUFB6,733605:up|ssc:100622220,SLC25A38,100622220:up|ssc:100037292,ACKR4,100037292:down|ssc:100144523,PMEPA1,100144523:down|ssc:100518612,MFSD2A,100518612:down|ssc:397620,FN1,397620:down|ssc:100623848,EXTL1,1006…	http://amigo.geneontology.org/cgi-bin/amigo/term_details?term=GO:0044425
response to growth factor	Biological Process	GO:0070848	15	111	0.0352929	0.223371	ssc:397137,IBSP,397137:down|ssc:100620511,CLEC3B,100620511:up|ssc:100522873,EPHA2,100522873:down|ssc:100519746,DAB2,100519746:down|ssc:396665,-,396665:down|ssc:100521305,SMAD7,100521305:down|ssc:100512012,WFIKKN2,100512012:up|ssc:654297,CITED1,654297:up|ssc:100144523,PMEPA1,100144523:down|ssc:100516296,EGR3,100516296:down|ssc:100113425,BMP4,100113425:down|ssc:397311,KDR,397311:down|ssc:396667,PTP…	http://amigo.geneontology.org/cgi-bin/amigo/term_details?term=GO:0070848
negative regulation of JUN kinase activity	Biological Process	GO:0043508	2	4	0.0357145	0.223371	ssc:100516027,SFRP2,100516027:down|ssc:100153176,SFRP5,100153176:down	http://amigo.geneontology.org/cgi-bin/amigo/term_details?term=GO:0043508
negative regulation of mesonephros development	Biological Process	GO:0061218	2	4	0.0357145	0.223371	ssc:100113425,BMP4,100113425:down|ssc:100156280,GREM1,100156280:down	http://amigo.geneontology.org/cgi-bin/amigo/term_details?term=GO:0061218
regulation of bile acid metabolic process	Biological Process	GO:1904251	2	4	0.0357145	0.223371	ssc:100169702,PROX1,100169702:down|ssc:100153960,NR1H4,100153960:up	http://amigo.geneontology.org/cgi-bin/amigo/term_details?term=GO:1904251
bile acid binding	Molecular Function	GO:0032052	2	4	0.0357145	0.223371	ssc:396628,VDR,396628:down|ssc:100153960,NR1H4,100153960:up	http://amigo.geneontology.org/cgi-bin/amigo/term_details?term=GO:0032052
negative regulation of lipopolysaccharide-mediated signaling pathway	Biological Process	GO:0031665	2	4	0.0357145	0.223371	ssc:397649,LTF,397649:up|ssc:100154350,NFKBIL1,100154350:up	http://amigo.geneontology.org/cgi-bin/amigo/term_details?term=GO:0031665
positive regulation of cardiac muscle cell differentiation	Biological Process	GO:2000727	2	4	0.0357145	0.223371	ssc:100113425,BMP4,100113425:down|ssc:100156280,GREM1,100156280:down	http://amigo.geneontology.org/cgi-bin/amigo/term_details?term=GO:2000727
establishment of blood-brain barrier	Biological Process	GO:0060856	2	4	0.0357145	0.223371	ssc:100621355,MXRA8,100621355:up|ssc:100518612,MFSD2A,100518612:down	http://amigo.geneontology.org/cgi-bin/amigo/term_details?term=GO:0060856
IgE binding	Molecular Function	GO:0019863	2	4	0.0357145	0.223371	ssc:397166,MS4A2,397166:down|ssc:397406,FCER1G,397406:down	http://amigo.geneontology.org/cgi-bin/amigo/term_details?term=GO:0019863
striated muscle cell apoptotic process	Biological Process	GO:0010658	2	4	0.0357145	0.223371	ssc:100516027,SFRP2,100516027:down|ssc:100152404,HEY2,100152404:down	http://amigo.geneontology.org/cgi-bin/amigo/term_details?term=GO:0010658
negative regulation of fertilization	Biological Process	GO:0060467	2	4	0.0357145	0.223371	ssc:396846,ZP2,396846:up|ssc:396927,ZP3,396927:up	http://amigo.geneontology.org/cgi-bin/amigo/term_details?term=GO:0060467
regulation of superoxide anion generation	Biological Process	GO:0032928	2	4	0.0357145	0.223371	ssc:396724,OLR1,396724:down|ssc:100519703,F2RL1,100519703:down	http://amigo.geneontology.org/cgi-bin/amigo/term_details?term=GO:0032928
receptor catabolic process	Biological Process	GO:0032801	2	4	0.0357145	0.223371	ssc:100156882,FURIN,100156882:down|ssc:100155795,MYLIP,100155795:up	http://amigo.geneontology.org/cgi-bin/amigo/term_details?term=GO:0032801
positive regulation of astrocyte differentiation	Biological Process	GO:0048711	2	4	0.0357145	0.223371	ssc:399503,LIF,399503:down|ssc:654298,ID2,654298:down	http://amigo.geneontology.org/cgi-bin/amigo/term_details?term=GO:0048711
cardiac muscle cell apoptotic process	Biological Process	GO:0010659	2	4	0.0357145	0.223371	ssc:100516027,SFRP2,100516027:down|ssc:100152404,HEY2,100152404:down	http://amigo.geneontology.org/cgi-bin/amigo/term_details?term=GO:0010659
epithelial cell proliferation involved in lung morphogenesis	Biological Process	GO:0060502	2	4	0.0357145	0.223371	ssc:100113425,BMP4,100113425:down|ssc:100155995,NFIB,100155995:up	http://amigo.geneontology.org/cgi-bin/amigo/term_details?term=GO:0060502
lipopeptide binding	Molecular Function	GO:0071723	2	4	0.0357145	0.223371	ssc:396785,CD1A,396785:down|ssc:396623,TLR2,396623:down	http://amigo.geneontology.org/cgi-bin/amigo/term_details?term=GO:0071723
costamere	Cellular Component	GO:0043034	2	4	0.0357145	0.223371	ssc:100515339,KRT19,100515339:up|ssc:100511977,-,100511977:up	http://amigo.geneontology.org/cgi-bin/amigo/term_details?term=GO:0043034
pulmonary artery morphogenesis	Biological Process	GO:0061156	2	4	0.0357145	0.223371	ssc:100113425,BMP4,100113425:down|ssc:100152404,HEY2,100152404:down	http://amigo.geneontology.org/cgi-bin/amigo/term_details?term=GO:0061156
regulation of transcription from RNA polymerase II promoter involved in myocardial precursor cell differentiation	Biological Process	GO:0003256	2	4	0.0357145	0.223371	ssc:100155958,SRF,100155958:down|ssc:100156280,GREM1,100156280:down	http://amigo.geneontology.org/cgi-bin/amigo/term_details?term=GO:0003256
disruption by host of symbiont cells	Biological Process	GO:0051852	2	4	0.0357145	0.223371	ssc:396900,AMCF-II,396900:down|ssc:100519703,F2RL1,100519703:down	http://amigo.geneontology.org/cgi-bin/amigo/term_details?term=GO:0051852
lymphatic endothelial cell differentiation	Biological Process	GO:0060836	2	4	0.0357145	0.223371	ssc:100127483,BMPR2,100127483:down|ssc:100169702,PROX1,100169702:down	http://amigo.geneontology.org/cgi-bin/amigo/term_details?term=GO:0060836
regulation of superoxide metabolic process	Biological Process	GO:0090322	2	4	0.0357145	0.223371	ssc:396724,OLR1,396724:down|ssc:100519703,F2RL1,100519703:down	http://amigo.geneontology.org/cgi-bin/amigo/term_details?term=GO:0090322
activin binding	Molecular Function	GO:0048185	2	4	0.0357145	0.223371	ssc:100521305,SMAD7,100521305:down|ssc:100152462,ACVR1B,100152462:down	http://amigo.geneontology.org/cgi-bin/amigo/term_details?term=GO:0048185
protein histidine kinase activity	Molecular Function	GO:0004673	2	4	0.0357145	0.223371	ssc:100523692,KCNH4,100523692:down|ssc:100126293,CASS4,100126293:down	http://amigo.geneontology.org/cgi-bin/amigo/term_details?term=GO:0004673
LBD domain binding	Molecular Function	GO:0050693	2	4	0.0357145	0.223371	ssc:654297,CITED1,654297:up|ssc:100169702,PROX1,100169702:down	http://amigo.geneontology.org/cgi-bin/amigo/term_details?term=GO:0050693
regulation of transforming growth factor beta1 production	Biological Process	GO:0032908	2	4	0.0357145	0.223371	ssc:100156882,FURIN,100156882:down|ssc:100621027,CX3CL1,100621027:down	http://amigo.geneontology.org/cgi-bin/amigo/term_details?term=GO:0032908
negative regulation of neuroblast proliferation	Biological Process	GO:0007406	2	4	0.0357145	0.223371	ssc:100622059,KCTD11,100622059:down|ssc:397495,BDNF,397495:down	http://amigo.geneontology.org/cgi-bin/amigo/term_details?term=GO:0007406
receptor agonist activity	Molecular Function	GO:0048018	2	4	0.0357145	0.223371	ssc:100516027,SFRP2,100516027:down|ssc:100156280,GREM1,100156280:down	http://amigo.geneontology.org/cgi-bin/amigo/term_details?term=GO:0048018
branch elongation involved in ureteric bud branching	Biological Process	GO:0060681	2	4	0.0357145	0.223371	ssc:100113425,BMP4,100113425:down|ssc:397497,FGF1,397497:down	http://amigo.geneontology.org/cgi-bin/amigo/term_details?term=GO:0060681
sphingomyelin metabolic process	Biological Process	GO:0006684	2	4	0.0357145	0.223371	ssc:100153442,-,100153442:down|ssc:100518796,SGMS2,100518796:down	http://amigo.geneontology.org/cgi-bin/amigo/term_details?term=GO:0006684
regulation of cardiac muscle cell apoptotic process	Biological Process	GO:0010665	2	4	0.0357145	0.223371	ssc:100516027,SFRP2,100516027:down|ssc:100152404,HEY2,100152404:down	http://amigo.geneontology.org/cgi-bin/amigo/term_details?term=GO:0010665
positive regulation of myeloid leukocyte mediated immunity	Biological Process	GO:0002888	2	4	0.0357145	0.223371	ssc:100519703,F2RL1,100519703:down|ssc:397406,FCER1G,397406:down	http://amigo.geneontology.org/cgi-bin/amigo/term_details?term=GO:0002888
positive thymic T cell selection	Biological Process	GO:0045059	2	4	0.0357145	0.223371	ssc:100155958,SRF,100155958:down|ssc:445528,HLA-DMA,445528:down	http://amigo.geneontology.org/cgi-bin/amigo/term_details?term=GO:0045059
transforming growth factor beta1 production	Biological Process	GO:0032905	2	4	0.0357145	0.223371	ssc:100156882,FURIN,100156882:down|ssc:100621027,CX3CL1,100621027:down	http://amigo.geneontology.org/cgi-bin/amigo/term_details?term=GO:0032905
bone mineralization involved in bone maturation	Biological Process	GO:0035630	2	4	0.0357145	0.223371	ssc:397649,LTF,397649:up|ssc:100156280,GREM1,100156280:down	http://amigo.geneontology.org/cgi-bin/amigo/term_details?term=GO:0035630
regulation of killing of cells of other organism	Biological Process	GO:0051709	2	4	0.0357145	0.223371	ssc:396900,AMCF-II,396900:down|ssc:100519703,F2RL1,100519703:down	http://amigo.geneontology.org/cgi-bin/amigo/term_details?term=GO:0051709
cysteine-type endopeptidase activator activity involved in apoptotic process	Molecular Function	GO:0008656	2	4	0.0357145	0.223371	ssc:396969,CTSH,396969:down|ssc:100513283,APAF1,100513283:down	http://amigo.geneontology.org/cgi-bin/amigo/term_details?term=GO:0008656
negative regulation of branching involved in ureteric bud morphogenesis	Biological Process	GO:0090191	2	4	0.0357145	0.223371	ssc:100113425,BMP4,100113425:down|ssc:100156280,GREM1,100156280:down	http://amigo.geneontology.org/cgi-bin/amigo/term_details?term=GO:0090191
dorsal aorta morphogenesis	Biological Process	GO:0035912	2	4	0.0357145	0.223371	ssc:100155958,SRF,100155958:down|ssc:100152404,HEY2,100152404:down	http://amigo.geneontology.org/cgi-bin/amigo/term_details?term=GO:0035912
regulation of bile acid biosynthetic process	Biological Process	GO:0070857	2	4	0.0357145	0.223371	ssc:100169702,PROX1,100169702:down|ssc:100153960,NR1H4,100153960:up	http://amigo.geneontology.org/cgi-bin/amigo/term_details?term=GO:0070857
regulation of striated muscle cell apoptotic process	Biological Process	GO:0010662	2	4	0.0357145	0.223371	ssc:100516027,SFRP2,100516027:down|ssc:100152404,HEY2,100152404:down	http://amigo.geneontology.org/cgi-bin/amigo/term_details?term=GO:0010662
positive regulation of muscle contraction	Biological Process	GO:0045933	2	4	0.0357145	0.223371	ssc:100155958,SRF,100155958:down|ssc:733670,RGS2,733670:up	http://amigo.geneontology.org/cgi-bin/amigo/term_details?term=GO:0045933
response to fungus	Biological Process	GO:0009620	2	4	0.0357145	0.223371	ssc:397649,LTF,397649:up|ssc:396623,TLR2,396623:down	http://amigo.geneontology.org/cgi-bin/amigo/term_details?term=GO:0009620
low-density lipoprotein receptor particle metabolic process	Biological Process	GO:0032799	2	4	0.0357145	0.223371	ssc:100156882,FURIN,100156882:down|ssc:100155795,MYLIP,100155795:up	http://amigo.geneontology.org/cgi-bin/amigo/term_details?term=GO:0032799
wound healing, spreading of epidermal cells	Biological Process	GO:0035313	2	4	0.0357145	0.223371	ssc:397564,HBEGF,397564:down|ssc:100155091,ITGA5,100155091:down	http://amigo.geneontology.org/cgi-bin/amigo/term_details?term=GO:0035313
lung vasculature development	Biological Process	GO:0060426	2	4	0.0357145	0.223371	ssc:399503,LIF,399503:down|ssc:100522839,ID1,100522839:up	http://amigo.geneontology.org/cgi-bin/amigo/term_details?term=GO:0060426
killing by host of symbiont cells	Biological Process	GO:0051873	2	4	0.0357145	0.223371	ssc:396900,AMCF-II,396900:down|ssc:100519703,F2RL1,100519703:down	http://amigo.geneontology.org/cgi-bin/amigo/term_details?term=GO:0051873
positive regulation of lipid storage	Biological Process	GO:0010884	2	4	0.0357145	0.223371	ssc:100158013,FITM2,100158013:down|ssc:100511665,MSR1,100511665:down	http://amigo.geneontology.org/cgi-bin/amigo/term_details?term=GO:0010884
Sin3 complex	Cellular Component	GO:0016580	2	4	0.0357145	0.223371	ssc:100153179,SUDS3,100153179:down|ssc:100152404,HEY2,100152404:down	http://amigo.geneontology.org/cgi-bin/amigo/term_details?term=GO:0016580
inner ear development	Biological Process	GO:0048839	9	56	0.0359857	0.223371	ssc:100152419,FRZB,100152419:up|ssc:494467,CXCL14,494467:down|ssc:100152404,HEY2,100152404:down|ssc:397495,BDNF,397495:down|ssc:445528,HLA-DMA,445528:down|ssc:100113425,BMP4,100113425:down|ssc:100519685,NAGLU,100519685:down|ssc:100169702,PROX1,100169702:down|ssc:100521986,MAPKAPK2,100521986:down	http://amigo.geneontology.org/cgi-bin/amigo/term_details?term=GO:0048839
epithelial tube formation	Biological Process	GO:0072175	7	39	0.036091	0.223371	ssc:100516027,SFRP2,100516027:down|ssc:100127155,LMO4,100127155:up|ssc:100620499,LUZP1,100620499:down|ssc:100113425,BMP4,100113425:down|ssc:100519335,IFT57,100519335:up|ssc:100156280,GREM1,100156280:down|ssc:100153176,SFRP5,100153176:down	http://amigo.geneontology.org/cgi-bin/amigo/term_details?term=GO:0072175
regulation of blood pressure	Biological Process	GO:0008217	7	39	0.036091	0.223371	ssc:100525148,PLCB3,100525148:down|ssc:100519703,F2RL1,100519703:down|ssc:397547,NPY1R,397547:up|ssc:100127483,BMPR2,100127483:down|ssc:654298,ID2,654298:down|ssc:414911,EDNRB,414911:down|ssc:100049663,EDN3,100049663:up	http://amigo.geneontology.org/cgi-bin/amigo/term_details?term=GO:0008217
embryonic epithelial tube formation	Biological Process	GO:0001838	7	39	0.036091	0.223371	ssc:100516027,SFRP2,100516027:down|ssc:100127155,LMO4,100127155:up|ssc:100620499,LUZP1,100620499:down|ssc:100113425,BMP4,100113425:down|ssc:100519335,IFT57,100519335:up|ssc:100156280,GREM1,100156280:down|ssc:100153176,SFRP5,100153176:down	http://amigo.geneontology.org/cgi-bin/amigo/term_details?term=GO:0001838
negative regulation of protein serine/threonine kinase activity	Biological Process	GO:0071901	7	39	0.036091	0.223371	ssc:100516027,SFRP2,100516027:down|ssc:100523472,DUSP19,100523472:up|ssc:100525560,CDKN2D,100525560:up|ssc:100113425,BMP4,100113425:down|ssc:733670,RGS2,733670:up|ssc:100524790,RGS14,100524790:down|ssc:100153176,SFRP5,100153176:down	http://amigo.geneontology.org/cgi-bin/amigo/term_details?term=GO:0071901
cellular response to unfolded protein	Biological Process	GO:0034620	4	16	0.0362444	0.223371	ssc:100520400,YOD1,100520400:down|ssc:396667,PTPN1,396667:down|ssc:100516663,CREB3L1,100516663:down|ssc:100522679,PPP1R15A,100522679:down	http://amigo.geneontology.org/cgi-bin/amigo/term_details?term=GO:0034620
memory	Biological Process	GO:0007613	4	16	0.0362444	0.223371	ssc:397251,PLK2,397251:down|ssc:100155091,ITGA5,100155091:down|ssc:100623510,S100B,100623510:up|ssc:100524790,RGS14,100524790:down	http://amigo.geneontology.org/cgi-bin/amigo/term_details?term=GO:0007613
[truncated: 4,825 more rows]
