# Supplementary material for: Identification of Differentially Expressed Genes in Porcine Ovaries at Proestrus and Estrus Stages Using RNA-Seq Technique
Source: Biomed Res Int. 2018 Feb 14;2018:9150723. doi: 10.1155/2018/9150723 (PMC5832140; doi:10.1155/2018/9150723)
Supplement: Supplementary Materials — Table S1: primer sequences for the genes selected for qRT-PCR. Table S2: DEGs identified under certain filter criteria. Table S3: GO enrichment analysis of DEGs. Table S4: KEGG pathway analysis of DEGs. [file 9150723.f1.zip › 9150723.f1/Table S4_BMRI_2153136.xlsx]

## Sheet: Sheet1
#Term	Database	ID	the number of target gene candidates in differential expression genes(1700)	the number of target gene candidates in all background genes(16305)	P-Value	Corrected_P-Value	Input_gene	Pathway_highlink
Rheumatoid arthritis	KEGG PATHWAY	ssc05323	20	69	0.000192765	0.0228161	ssc:397094,IL1A,397094:down|ssc:397441,CD86,397441:down|ssc:100135040,SLA-DRA,100135040:down|ssc:397320,MMP1,397320:down|ssc:100153386,SLA-DRB1,100153386:down|ssc:100037921,SLA-DQB1,100037921:down|ssc:100515919,CTSL,100515919:down|ssc:100153387,SLA-DQA,100153387:down|ssc:100523998,-,100523998:down|ssc:397122,IL1B1,397122:down|ssc:445528,HLA-DMA,445528:down|ssc:396880,-,396880:down|ssc:396900,AMCF…	http://www.genome.jp/kegg-bin/show_pathway?ssc05323/ssc:100515919%09blue/ssc:445528%09blue/ssc:100153387%09blue/ssc:100620730%09blue/ssc:100037921%09blue/ssc:396900%09blue/ssc:100038026%09blue/ssc:396943%09blue/ssc:100135040%09blue/ssc:397094%09blue/ssc:397472%09blue/ssc:100153386%09blue/ssc:397320%09blue/ssc:397122%09blue/ssc:396623%09blue/ssc:399541%09blue/ssc:396880%09blue/ssc:397441%09blue/ss…
Phagosome	KEGG PATHWAY	ssc04145	27	113	0.000254097	0.0228161	ssc:100627149,-,100627149:down|ssc:100627693,RAB7B,100627693:down|ssc:397472,ATP6V1H,397472:down|ssc:100037921,SLA-DQB1,100037921:down|ssc:399541,TLR4,399541:down|ssc:445464,C1R,445464:up|ssc:100135050,SLA-DMB,100135050:down|ssc:100153386,SLA-DRB1,100153386:down|ssc:100153387,SLA-DQA,100153387:down|ssc:100142665,NCF2,100142665:down|ssc:445528,HLA-DMA,445528:down|ssc:100038025,CLEC7A,100038025:dow…	http://www.genome.jp/kegg-bin/show_pathway?ssc04145/ssc:100153387%09blue/ssc:100037938%09blue/ssc:100170134%09blue/ssc:100135040%09blue/ssc:100153386%09blue/ssc:100515919%09blue/ssc:445528%09blue/ssc:396724%09blue/ssc:397472%09blue/ssc:396623%09blue/ssc:100736584%09blue/ssc:100135050%09blue/ssc:100155091%09blue/ssc:100523998%09blue/ssc:100627693%09blue/ssc:100627149%09blue/ssc:399541%09blue/ssc:4…
Amoebiasis	KEGG PATHWAY	ssc05146	19	67	0.000347696	0.0228161	ssc:100516581,PLCB4,100516581:down|ssc:100627693,RAB7B,100627693:down|ssc:396851,PIK3R5,396851:down|ssc:100519286,SERPINB2,100519286:down|ssc:100154994,SERPINB10,100154994:down|ssc:100514785,LAMC1,100514785:down|ssc:396880,-,396880:down|ssc:100048958,GNA14,100048958:down|ssc:100525148,PLCB3,100525148:down|ssc:397115,-,397115:down|ssc:397122,IL1B1,397122:down|ssc:100037938,CD14,100037938:down|ssc:…	http://www.genome.jp/kegg-bin/show_pathway?ssc05146/ssc:100525148%09blue/ssc:100627693%09blue/ssc:397620%09blue/ssc:100628112%09blue/ssc:100620730%09blue/ssc:100519286%09blue/ssc:100048958%09blue/ssc:399541%09blue/ssc:100516581%09blue/ssc:397106%09blue/ssc:100154994%09blue/ssc:397115%09blue/ssc:397122%09blue/ssc:396623%09blue/ssc:100514785%09blue/ssc:396880%09blue/ssc:100037938%09blue/ssc:396851%…
Staphylococcus aureus infection	KEGG PATHWAY	ssc05150	13	36	0.000463412	0.0228161	ssc:100125963,SELPLG,100125963:down|ssc:100037921,SLA-DQB1,100037921:down|ssc:100153386,SLA-DRB1,100153386:down|ssc:100153387,SLA-DQA,100153387:down|ssc:613131,FCGR2B,613131:down|ssc:397150,SELP,397150:down|ssc:445528,HLA-DMA,445528:down|ssc:397106,IL10,397106:down|ssc:396943,ITGB2,396943:down|ssc:100135040,SLA-DRA,100135040:down|ssc:100135050,SLA-DMB,100135050:down|ssc:100516921,CFI,100516921:up…	http://www.genome.jp/kegg-bin/show_pathway?ssc05150/ssc:397150%09blue/ssc:445528%09blue/ssc:100153387%09blue/ssc:100153386%09blue/ssc:397106%09blue/ssc:445464%09red/ssc:100037921%09blue/ssc:613131%09blue/ssc:100125963%09blue/ssc:100135040%09blue/ssc:100516921%09red/ssc:396943%09blue/ssc:100135050%09blue
Leishmaniasis	KEGG PATHWAY	ssc05140	15	47	0.000515185	0.0228161	ssc:397094,IL1A,397094:down|ssc:100152055,NCF4,100152055:down|ssc:397201,JAK2,397201:down|ssc:100037921,SLA-DQB1,100037921:down|ssc:100153386,SLA-DRB1,100153386:down|ssc:100153387,SLA-DQA,100153387:down|ssc:100142665,NCF2,100142665:down|ssc:445528,HLA-DMA,445528:down|ssc:397106,IL10,397106:down|ssc:396943,ITGB2,396943:down|ssc:100135040,SLA-DRA,100135040:down|ssc:100135050,SLA-DMB,100135050:down|…	http://www.genome.jp/kegg-bin/show_pathway?ssc05140/ssc:397201%09blue/ssc:397094%09blue/ssc:445528%09blue/ssc:100153387%09blue/ssc:100153386%09blue/ssc:100037921%09blue/ssc:100152055%09blue/ssc:399541%09blue/ssc:397106%09blue/ssc:100142665%09blue/ssc:397122%09blue/ssc:396623%09blue/ssc:100135040%09blue/ssc:396943%09blue/ssc:100135050%09blue
Viral myocarditis	KEGG PATHWAY	ssc05416	13	37	0.000572789	0.0228161	ssc:397441,CD86,397441:down|ssc:100135040,SLA-DRA,100135040:down|ssc:100621675,-,100621675:down|ssc:100037921,SLA-DQB1,100037921:down|ssc:100135050,SLA-DMB,100135050:down|ssc:100153386,SLA-DRB1,100153386:down|ssc:100153387,SLA-DQA,100153387:down|ssc:100620392,DAG1,100620392:down|ssc:100627149,-,100627149:down|ssc:445528,HLA-DMA,445528:down|ssc:396943,ITGB2,396943:down|ssc:100627019,ABL2,100627019…	http://www.genome.jp/kegg-bin/show_pathway?ssc05416/ssc:445528%09blue/ssc:100153387%09blue/ssc:100620392%09blue/ssc:100627019%09blue/ssc:396943%09blue/ssc:100135050%09blue/ssc:100037921%09blue/ssc:100153386%09blue/ssc:100621675%09blue/ssc:100627149%09blue/ssc:100135040%09blue/ssc:397441%09blue/ssc:100240723%09red
Osteoclast differentiation	KEGG PATHWAY	ssc04380	20	80	0.000954481	0.0280177	ssc:397094,IL1A,397094:down|ssc:100134969,NFATC2,100134969:down|ssc:100738857,-,100738857:down|ssc:100152055,NCF4,100152055:down|ssc:414912,SPI1,414912:down|ssc:100517988,-,100517988:down|ssc:397122,IL1B1,397122:down|ssc:100142665,NCF2,100142665:down|ssc:396665,-,396665:down|ssc:397063,ITGB3,397063:down|ssc:100627149,-,100627149:down|ssc:613131,FCGR2B,613131:down|ssc:100627308,-,100627308:down|ss…	http://www.genome.jp/kegg-bin/show_pathway?ssc04380/ssc:100152055%09blue/ssc:397063%09blue/ssc:100624191%09blue/ssc:100134969%09blue/ssc:397094%09blue/ssc:414912%09blue/ssc:100522225%09blue/ssc:397122%09blue/ssc:100142665%09blue/ssc:613131%09blue/ssc:100627308%09blue/ssc:397405%09blue/ssc:100517988%09blue/ssc:100627149%09blue/ssc:100738857%09blue/ssc:100517099%09blue/ssc:396851%09blue/ssc:396665%…
Asthma	KEGG PATHWAY	ssc05310	9	20	0.00101784	0.0280177	ssc:100037921,SLA-DQB1,100037921:down|ssc:100153386,SLA-DRB1,100153386:down|ssc:100153387,SLA-DQA,100153387:down|ssc:397166,MS4A2,397166:down|ssc:445528,HLA-DMA,445528:down|ssc:397106,IL10,397106:down|ssc:397406,FCER1G,397406:down|ssc:100135040,SLA-DRA,100135040:down|ssc:100135050,SLA-DMB,100135050:down	http://www.genome.jp/kegg-bin/show_pathway?ssc05310/ssc:445528%09blue/ssc:100153387%09blue/ssc:100153386%09blue/ssc:397166%09blue/ssc:397106%09blue/ssc:100037921%09blue/ssc:397406%09blue/ssc:100135040%09blue/ssc:100135050%09blue
Graft-versus-host disease	KEGG PATHWAY	ssc05332	10	25	0.00110885	0.0280177	ssc:397094,IL1A,397094:down|ssc:397441,CD86,397441:down|ssc:396826,FAS,396826:down|ssc:100135050,SLA-DMB,100135050:down|ssc:100153386,SLA-DRB1,100153386:down|ssc:100153387,SLA-DQA,100153387:down|ssc:445528,HLA-DMA,445528:down|ssc:100135040,SLA-DRA,100135040:down|ssc:100037921,SLA-DQB1,100037921:down|ssc:397122,IL1B1,397122:down	http://www.genome.jp/kegg-bin/show_pathway?ssc05332/ssc:445528%09blue/ssc:100153387%09blue/ssc:100153386%09blue/ssc:397094%09blue/ssc:100037921%09blue/ssc:397122%09blue/ssc:100135040%09blue/ssc:397441%09blue/ssc:396826%09blue/ssc:100135050%09blue
Cytokine-cytokine receptor interaction	KEGG PATHWAY	ssc04060	34	175	0.0011804	0.0280177	ssc:397094,IL1A,397094:down|ssc:100516458,TNFSF18,100516458:down|ssc:397614,IL4R,397614:down|ssc:396665,-,396665:down|ssc:100525654,IL10RA,100525654:down|ssc:100124654,-,100124654:down|ssc:100524561,PPBP,100524561:down|ssc:100515191,TSLP,100515191:down|ssc:396826,FAS,396826:down|ssc:100738857,-,100738857:down|ssc:414375,XCR1,414375:down|ssc:414374,CCR1,414374:down|ssc:399503,LIF,399503:down|ssc:4…	http://www.genome.jp/kegg-bin/show_pathway?ssc04060/ssc:100127483%09blue/ssc:574055%09blue/ssc:100124654%09blue/ssc:100516458%09blue/ssc:397094%09blue/ssc:414371%09blue/ssc:100153254%09blue/ssc:100621027%09blue/ssc:100525654%09blue/ssc:397614%09blue/ssc:100524561%09blue/ssc:414374%09blue/ssc:414375%09blue/ssc:397106%09blue/ssc:414372%09blue/ssc:397122%09blue/ssc:494467%09blue/ssc:100738857%09blue…
Cell adhesion molecules (CAMs)	KEGG PATHWAY	ssc04514	22	95	0.00128952	0.0280177	ssc:100127138,F11R,100127138:down|ssc:397150,SELP,397150:down|ssc:100037921,SLA-DQB1,100037921:down|ssc:100519770,SDC1,100519770:down|ssc:100135050,SLA-DMB,100135050:down|ssc:100153386,SLA-DRB1,100153386:down|ssc:100153387,SLA-DQA,100153387:down|ssc:445528,HLA-DMA,445528:down|ssc:100515564,NCAM1,100515564:down|ssc:100625166,CLDN1,100625166:down|ssc:397441,CD86,397441:down|ssc:100525346,PVR,100525…	http://www.genome.jp/kegg-bin/show_pathway?ssc04514/ssc:100621467%09blue/ssc:100153387%09blue/ssc:100153386%09blue/ssc:100522631%09blue/ssc:100135040%09blue/ssc:100127138%09blue/ssc:100525346%09blue/ssc:445528%09blue/ssc:100153752%09red/ssc:100135050%09blue/ssc:397285%09blue/ssc:404704%09blue/ssc:100127147%09blue/ssc:100037921%09blue/ssc:100519770%09blue/ssc:396943%09blue/ssc:397150%09blue/ssc:10…
Chemokine signaling pathway	KEGG PATHWAY	ssc04062	25	122	0.00271294	0.0540328	ssc:100621675,-,100621675:down|ssc:397201,JAK2,397201:down|ssc:100627149,-,100627149:down|ssc:100524561,PPBP,100524561:down|ssc:100519821,VAV1,100519821:down|ssc:414375,XCR1,414375:down|ssc:414374,CCR1,414374:down|ssc:414371,CCR5,414371:down|ssc:414372,CCR2,414372:down|ssc:396880,-,396880:down|ssc:494467,CXCL14,494467:down|ssc:100516581,PLCB4,100516581:down|ssc:414904,CXCL2,414904:down|ssc:100302…	http://www.genome.jp/kegg-bin/show_pathway?ssc04062/ssc:100124654%09blue/ssc:100516581%09blue/ssc:414904%09blue/ssc:100621675%09blue/ssc:100525528%09blue/ssc:100621027%09blue/ssc:100525148%09blue/ssc:397201%09blue/ssc:414374%09blue/ssc:414375%09blue/ssc:414371%09blue/ssc:414372%09blue/ssc:100627149%09blue/ssc:494467%09blue/ssc:100522109%09blue/ssc:100524561%09blue/ssc:100620730%09blue/ssc:396900%…
Type I diabetes mellitus	KEGG PATHWAY	ssc04940	10	30	0.00331347	0.0609169	ssc:397094,IL1A,397094:down|ssc:397441,CD86,397441:down|ssc:396826,FAS,396826:down|ssc:100135050,SLA-DMB,100135050:down|ssc:100153386,SLA-DRB1,100153386:down|ssc:100153387,SLA-DQA,100153387:down|ssc:445528,HLA-DMA,445528:down|ssc:100135040,SLA-DRA,100135040:down|ssc:100037921,SLA-DQB1,100037921:down|ssc:397122,IL1B1,397122:down	http://www.genome.jp/kegg-bin/show_pathway?ssc04940/ssc:445528%09blue/ssc:100153387%09blue/ssc:100153386%09blue/ssc:397094%09blue/ssc:100037921%09blue/ssc:397122%09blue/ssc:100135040%09blue/ssc:397441%09blue/ssc:396826%09blue/ssc:100135050%09blue
Tuberculosis	KEGG PATHWAY	ssc05152	24	122	0.0050821	0.0834133	ssc:397094,IL1A,397094:down|ssc:397201,JAK2,397201:down|ssc:613131,FCGR2B,613131:down|ssc:100525654,IL10RA,100525654:down|ssc:397472,ATP6V1H,397472:down|ssc:100037921,SLA-DQB1,100037921:down|ssc:399541,TLR4,399541:down|ssc:100513283,APAF1,100513283:down|ssc:100135050,SLA-DMB,100135050:down|ssc:100153386,SLA-DRB1,100153386:down|ssc:100153387,SLA-DQA,100153387:down|ssc:445528,HLA-DMA,445528:down|ss…	http://www.genome.jp/kegg-bin/show_pathway?ssc05152/ssc:100153387%09blue/ssc:100037938%09blue/ssc:397094%09blue/ssc:100135040%09blue/ssc:100525654%09blue/ssc:100153386%09blue/ssc:397201%09blue/ssc:445528%09blue/ssc:100153411%09blue/ssc:397106%09blue/ssc:397472%09blue/ssc:397122%09blue/ssc:397007%09blue/ssc:396623%09blue/ssc:100135050%09blue/ssc:396628%09blue/ssc:100513283%09blue/ssc:399541%09blue…
Allograft rejection	KEGG PATHWAY	ssc05330	9	27	0.00523514	0.0834133	ssc:397441,CD86,397441:down|ssc:396826,FAS,396826:down|ssc:100037921,SLA-DQB1,100037921:down|ssc:100153386,SLA-DRB1,100153386:down|ssc:100153387,SLA-DQA,100153387:down|ssc:445528,HLA-DMA,445528:down|ssc:397106,IL10,397106:down|ssc:100135040,SLA-DRA,100135040:down|ssc:100135050,SLA-DMB,100135050:down	http://www.genome.jp/kegg-bin/show_pathway?ssc05330/ssc:445528%09blue/ssc:100153387%09blue/ssc:100153386%09blue/ssc:397106%09blue/ssc:100037921%09blue/ssc:100135040%09blue/ssc:397441%09blue/ssc:396826%09blue/ssc:100135050%09blue
Intestinal immune network for IgA production	KEGG PATHWAY	ssc04672	10	35	0.00809088	0.120858	ssc:397441,CD86,397441:down|ssc:100135040,SLA-DRA,100135040:down|ssc:100037921,SLA-DQB1,100037921:down|ssc:100153386,SLA-DRB1,100153386:down|ssc:100153387,SLA-DQA,100153387:down|ssc:445528,HLA-DMA,445528:down|ssc:397106,IL10,397106:down|ssc:100038026,TNFSF13B,100038026:down|ssc:100135050,SLA-DMB,100135050:down|ssc:100621467,-,100621467:down	http://www.genome.jp/kegg-bin/show_pathway?ssc04672/ssc:100621467%09blue/ssc:445528%09blue/ssc:100153387%09blue/ssc:100153386%09blue/ssc:100038026%09blue/ssc:397106%09blue/ssc:100037921%09blue/ssc:100135040%09blue/ssc:397441%09blue/ssc:100135050%09blue
Hematopoietic cell lineage	KEGG PATHWAY	ssc04640	14	60	0.00869459	0.122236	ssc:397094,IL1A,397094:down|ssc:396785,CD1A,396785:down|ssc:100525150,CD44,100525150:down|ssc:397614,IL4R,397614:down|ssc:100511536,MME,100511536:down|ssc:397063,ITGB3,397063:down|ssc:100517053,ITGA3,100517053:down|ssc:100271930,IL7R,100271930:down|ssc:100037938,CD14,100037938:down|ssc:100517086,CSF1R,100517086:down|ssc:100628112,IL1R2,100628112:down|ssc:404704,CD4,404704:down|ssc:397122,IL1B1,39…	http://www.genome.jp/kegg-bin/show_pathway?ssc04640/ssc:100517053%09blue/ssc:100628112%09blue/ssc:404704%09blue/ssc:100037938%09blue/ssc:100271930%09blue/ssc:100517086%09blue/ssc:397094%09blue/ssc:397122%09blue/ssc:100525150%09blue/ssc:397063%09blue/ssc:100511536%09blue/ssc:396785%09blue/ssc:100155091%09blue/ssc:397614%09blue
Inflammatory bowel disease (IBD)	KEGG PATHWAY	ssc05321	12	49	0.0107072	0.131299	ssc:397094,IL1A,397094:down|ssc:100153386,SLA-DRB1,100153386:down|ssc:100037921,SLA-DQB1,100037921:down|ssc:397614,IL4R,397614:down|ssc:100153387,SLA-DQA,100153387:down|ssc:445528,HLA-DMA,445528:down|ssc:397106,IL10,397106:down|ssc:100135040,SLA-DRA,100135040:down|ssc:100135050,SLA-DMB,100135050:down|ssc:399541,TLR4,399541:down|ssc:397122,IL1B1,397122:down|ssc:396623,TLR2,396623:down	http://www.genome.jp/kegg-bin/show_pathway?ssc05321/ssc:445528%09blue/ssc:100153387%09blue/ssc:100153386%09blue/ssc:100037921%09blue/ssc:399541%09blue/ssc:397106%09blue/ssc:397094%09blue/ssc:397122%09blue/ssc:396623%09blue/ssc:100135040%09blue/ssc:100135050%09blue/ssc:397614%09blue
Proteoglycans in cancer	KEGG PATHWAY	ssc05205	23	124	0.0108324	0.131299	ssc:654325,MMP9,654325:down|ssc:100521992,HCLS1,100521992:down|ssc:397458,SLC9A1,397458:down|ssc:100627149,-,100627149:down|ssc:100521017,PLAUR,100521017:down|ssc:100152215,-,100152215:down|ssc:399541,TLR4,399541:down|ssc:396826,FAS,396826:down|ssc:100519770,SDC1,100519770:down|ssc:397620,FN1,397620:down|ssc:100525150,CD44,100525150:down|ssc:100155091,ITGA5,100155091:down|ssc:397564,HBEGF,397564:…	http://www.genome.jp/kegg-bin/show_pathway?ssc05205/ssc:100524961%09blue/ssc:100515919%09blue/ssc:397063%09blue/ssc:397458%09blue/ssc:396826%09blue/ssc:396985%09blue/ssc:100627149%09blue/ssc:397311%09blue/ssc:100155091%09blue/ssc:397285%09blue/ssc:396623%09blue/ssc:399541%09blue/ssc:654325%09blue/ssc:100519770%09blue/ssc:100521017%09blue/ssc:396696%09blue/ssc:397620%09blue/ssc:100621690%09blue/ss…
Malaria	KEGG PATHWAY	ssc05144	11	43	0.0109874	0.131299	ssc:100514839,-,100514839:down|ssc:100519770,SDC1,100519770:down|ssc:397150,SELP,397150:down|ssc:397106,IL10,397106:down|ssc:397122,IL1B1,397122:down|ssc:396880,-,396880:down|ssc:396943,ITGB2,396943:down|ssc:397007,TLR9,397007:down|ssc:399541,TLR4,399541:down|ssc:100620730,-,100620730:down|ssc:396623,TLR2,396623:down	http://www.genome.jp/kegg-bin/show_pathway?ssc05144/ssc:397150%09blue/ssc:100620730%09blue/ssc:399541%09blue/ssc:397106%09blue/ssc:100519770%09blue/ssc:397122%09blue/ssc:397007%09blue/ssc:396623%09blue/ssc:396880%09blue/ssc:100514839%09blue/ssc:396943%09blue
ECM-receptor interaction	KEGG PATHWAY	ssc04512	12	50	0.0121675	0.138477	ssc:100620392,DAG1,100620392:down|ssc:397087,SPP1,397087:down|ssc:100520350,ITGA11,100520350:down|ssc:100519770,SDC1,100519770:down|ssc:100525150,CD44,100525150:down|ssc:397063,ITGB3,397063:down|ssc:100517053,ITGA3,100517053:down|ssc:397620,FN1,397620:down|ssc:100514785,LAMC1,100514785:down|ssc:397285,ITGAV,397285:down|ssc:397137,IBSP,397137:down|ssc:100155091,ITGA5,100155091:down	http://www.genome.jp/kegg-bin/show_pathway?ssc04512/ssc:397620%09blue/ssc:397063%09blue/ssc:100620392%09blue/ssc:100517053%09blue/ssc:397087%09blue/ssc:100525150%09blue/ssc:100519770%09blue/ssc:397137%09blue/ssc:100514785%09blue/ssc:100155091%09blue/ssc:397285%09blue/ssc:100520350%09blue
Toxoplasmosis	KEGG PATHWAY	ssc05145	15	70	0.0127744	0.138777	ssc:100135040,SLA-DRA,100135040:down|ssc:396851,PIK3R5,396851:down|ssc:397201,JAK2,397201:down|ssc:100037921,SLA-DQB1,100037921:down|ssc:100153386,SLA-DRB1,100153386:down|ssc:100153387,SLA-DQA,100153387:down|ssc:414371,CCR5,414371:down|ssc:100514785,LAMC1,100514785:down|ssc:100525654,IL10RA,100525654:down|ssc:445528,HLA-DMA,445528:down|ssc:397106,IL10,397106:down|ssc:100152612,-,100152612:down|ss…	http://www.genome.jp/kegg-bin/show_pathway?ssc05145/ssc:397201%09blue/ssc:445528%09blue/ssc:100153387%09blue/ssc:100153386%09blue/ssc:100152612%09blue/ssc:396851%09blue/ssc:397106%09blue/ssc:414371%09blue/ssc:399541%09blue/ssc:396623%09blue/ssc:100514785%09blue/ssc:100135040%09blue/ssc:100037921%09blue/ssc:100525654%09blue/ssc:100135050%09blue
Legionellosis	KEGG PATHWAY	ssc05134	11	45	0.0143731	0.149356	ssc:414904,CXCL2,414904:down|ssc:397319,CASP1,397319:down|ssc:100513283,APAF1,100513283:down|ssc:399541,TLR4,399541:down|ssc:396880,-,396880:down|ssc:397122,IL1B1,397122:down|ssc:100037938,CD14,100037938:down|ssc:396943,ITGB2,396943:down|ssc:100525528,-,100525528:down|ssc:100620730,-,100620730:down|ssc:396623,TLR2,396623:down	http://www.genome.jp/kegg-bin/show_pathway?ssc05134/ssc:100513283%09blue/ssc:100620730%09blue/ssc:399541%09blue/ssc:414904%09blue/ssc:397319%09blue/ssc:100525528%09blue/ssc:397122%09blue/ssc:396623%09blue/ssc:396880%09blue/ssc:100037938%09blue/ssc:396943%09blue
Pertussis	KEGG PATHWAY	ssc05133	13	60	0.0182585	0.181825	ssc:397094,IL1A,397094:down|ssc:100623776,TICAM1,100623776:down|ssc:397319,CASP1,397319:down|ssc:397122,IL1B1,397122:down|ssc:396880,-,396880:down|ssc:396900,AMCF-II,396900:down|ssc:100037938,CD14,100037938:down|ssc:397106,IL10,397106:down|ssc:396943,ITGB2,396943:down|ssc:100155091,ITGA5,100155091:down|ssc:399541,TLR4,399541:down|ssc:100620730,-,100620730:down|ssc:445464,C1R,445464:up	http://www.genome.jp/kegg-bin/show_pathway?ssc05133/ssc:100623776%09blue/ssc:397319%09blue/ssc:100620730%09blue/ssc:396900%09blue/ssc:397106%09blue/ssc:445464%09red/ssc:397094%09blue/ssc:399541%09blue/ssc:397122%09blue/ssc:396880%09blue/ssc:100037938%09blue/ssc:100155091%09blue/ssc:396943%09blue
Galactose metabolism	KEGG PATHWAY	ssc00052	6	18	0.0213653	0.202114	ssc:100514142,GCK,100514142:up|ssc:100522855,HK3,100522855:down|ssc:396816,AKR1B1,396816:down|ssc:100522261,-,100522261:down|ssc:100415928,GLA,100415928:down|ssc:494561,HK2,494561:down	http://www.genome.jp/kegg-bin/show_pathway?ssc00052/ssc:100514142%09red/ssc:396816%09blue/ssc:100415928%09blue/ssc:100522855%09blue/ssc:100522261%09blue/ssc:494561%09blue
Butirosin and neomycin biosynthesis	KEGG PATHWAY	ssc00524	3	4	0.0219873	0.202114	ssc:494561,HK2,494561:down|ssc:100514142,GCK,100514142:up|ssc:100522855,HK3,100522855:down	http://www.genome.jp/kegg-bin/show_pathway?ssc00524/ssc:100514142%09red/ssc:494561%09blue/ssc:100522855%09blue
Fc epsilon RI signaling pathway	KEGG PATHWAY	ssc04664	9	36	0.0228924	0.20264	ssc:100621675,-,100621675:down|ssc:396851,PIK3R5,396851:down|ssc:100517988,-,100517988:down|ssc:100627149,-,100627149:down|ssc:397166,MS4A2,397166:down|ssc:100627308,-,100627308:down|ssc:100511843,LCP2,100511843:down|ssc:397406,FCER1G,397406:down|ssc:100519821,VAV1,100519821:down	http://www.genome.jp/kegg-bin/show_pathway?ssc04664/ssc:100519821%09blue/ssc:397166%09blue/ssc:100621675%09blue/ssc:397406%09blue/ssc:100627308%09blue/ssc:100511843%09blue/ssc:100627149%09blue/ssc:396851%09blue/ssc:100517988%09blue
Chagas disease (American trypanosomiasis)	KEGG PATHWAY	ssc05142	15	78	0.0273948	0.233834	ssc:100516581,PLCB4,100516581:down|ssc:396826,FAS,396826:down|ssc:100623776,TICAM1,100623776:down|ssc:100738857,-,100738857:down|ssc:396851,PIK3R5,396851:down|ssc:396665,-,396665:down|ssc:100048958,GNA14,100048958:down|ssc:100525148,PLCB3,100525148:down|ssc:397106,IL10,397106:down|ssc:397122,IL1B1,397122:down|ssc:396880,-,396880:down|ssc:397007,TLR9,397007:down|ssc:399541,TLR4,399541:down|ssc:100…	http://www.genome.jp/kegg-bin/show_pathway?ssc05142/ssc:100525148%09blue/ssc:100623776%09blue/ssc:100620730%09blue/ssc:100516581%09blue/ssc:399541%09blue/ssc:397106%09blue/ssc:100048958%09blue/ssc:397122%09blue/ssc:397007%09blue/ssc:396623%09blue/ssc:100738857%09blue/ssc:396880%09blue/ssc:396665%09blue/ssc:396826%09blue/ssc:396851%09blue
African trypanosomiasis	KEGG PATHWAY	ssc05143	7	26	0.0317024	0.261271	ssc:100516581,PLCB4,100516581:down|ssc:396826,FAS,396826:down|ssc:100525148,PLCB3,100525148:down|ssc:397106,IL10,397106:down|ssc:397007,TLR9,397007:down|ssc:100519703,F2RL1,100519703:down|ssc:397122,IL1B1,397122:down	http://www.genome.jp/kegg-bin/show_pathway?ssc05143/ssc:100525148%09blue/ssc:100519703%09blue/ssc:100516581%09blue/ssc:397106%09blue/ssc:397122%09blue/ssc:397007%09blue/ssc:396826%09blue
Autoimmune thyroid disease	KEGG PATHWAY	ssc05320	9	39	0.0336341	0.267951	ssc:397441,CD86,397441:down|ssc:396826,FAS,396826:down|ssc:100037921,SLA-DQB1,100037921:down|ssc:100153386,SLA-DRB1,100153386:down|ssc:100153387,SLA-DQA,100153387:down|ssc:445528,HLA-DMA,445528:down|ssc:397106,IL10,397106:down|ssc:100135040,SLA-DRA,100135040:down|ssc:100135050,SLA-DMB,100135050:down	http://www.genome.jp/kegg-bin/show_pathway?ssc05320/ssc:445528%09blue/ssc:100153387%09blue/ssc:100153386%09blue/ssc:397106%09blue/ssc:100037921%09blue/ssc:100135040%09blue/ssc:397441%09blue/ssc:396826%09blue/ssc:100135050%09blue
Antigen processing and presentation	KEGG PATHWAY	ssc04612	10	47	0.0392264	0.302423	ssc:397572,PSME1,397572:up|ssc:100153386,SLA-DRB1,100153386:down|ssc:100037921,SLA-DQB1,100037921:down|ssc:100515919,CTSL,100515919:down|ssc:100153387,SLA-DQA,100153387:down|ssc:100174943,IFI30,100174943:down|ssc:445528,HLA-DMA,445528:down|ssc:100135040,SLA-DRA,100135040:down|ssc:100135050,SLA-DMB,100135050:down|ssc:404704,CD4,404704:down	http://www.genome.jp/kegg-bin/show_pathway?ssc04612/ssc:100515919%09blue/ssc:445528%09blue/ssc:100153387%09blue/ssc:100153386%09blue/ssc:100037921%09blue/ssc:404704%09blue/ssc:100135040%09blue/ssc:397572%09red/ssc:100174943%09blue/ssc:100135050%09blue
B cell receptor signaling pathway	KEGG PATHWAY	ssc04662	9	41	0.0424718	0.317211	ssc:100134969,NFATC2,100134969:down|ssc:100621675,-,100621675:down|ssc:396851,PIK3R5,396851:down|ssc:100517988,-,100517988:down|ssc:100627149,-,100627149:down|ssc:100153411,BCL10B,100153411:down|ssc:100627308,-,100627308:down|ssc:100153486,NFKBIE,100153486:down|ssc:100519821,VAV1,100519821:down	http://www.genome.jp/kegg-bin/show_pathway?ssc04662/ssc:100519821%09blue/ssc:100153486%09blue/ssc:100134969%09blue/ssc:100621675%09blue/ssc:100627308%09blue/ssc:100517988%09blue/ssc:100627149%09blue/ssc:100153411%09blue/ssc:396851%09blue
Endocytosis	KEGG PATHWAY	ssc04144	21	133	0.0550067	0.38765	ssc:100521305,SMAD7,100521305:down|ssc:100151957,PARD6B,100151957:down|ssc:396853,-,396853:up|ssc:100738857,-,100738857:down|ssc:100153921,DNM1,100153921:up|ssc:100516044,CHMP2B,100516044:down|ssc:100524550,VPS37D,100524550:up|ssc:414371,CCR5,414371:down|ssc:396665,-,396665:down|ssc:397311,KDR,397311:down|ssc:100522530,SH3KBP1,100522530:down|ssc:100621690,CBLB,100621690:down|ssc:100270722,ARF5,10…	http://www.genome.jp/kegg-bin/show_pathway?ssc04144/ssc:100517086%09blue/ssc:100270722%09red/ssc:100151957%09blue/ssc:100124654%09blue/ssc:100522530%09blue/ssc:100154195%09blue/ssc:100521305%09blue/ssc:100621690%09blue/ssc:100738234%09blue/ssc:100516729%09blue/ssc:414371%09blue/ssc:100516044%09blue/ssc:100153921%09red/ssc:100738857%09blue/ssc:100524550%09red/ssc:100519446%09blue/ssc:397311%09blue…
Natural killer cell mediated cytotoxicity	KEGG PATHWAY	ssc04650	13	72	0.0551468	0.38765	ssc:100134969,NFATC2,100134969:down|ssc:396826,FAS,396826:down|ssc:100621675,-,100621675:down|ssc:396851,PIK3R5,396851:down|ssc:100521647,-,100521647:down|ssc:100511130,CD48,100511130:down|ssc:100627149,-,100627149:down|ssc:100157507,PTK2B,100157507:down|ssc:100511843,LCP2,100511843:down|ssc:397406,FCER1G,397406:down|ssc:396943,ITGB2,396943:down|ssc:397405,TYROBP,397405:down|ssc:100519821,VAV1,10…	http://www.genome.jp/kegg-bin/show_pathway?ssc04650/ssc:100157507%09blue/ssc:100519821%09blue/ssc:100134969%09blue/ssc:100621675%09blue/ssc:397406%09blue/ssc:397405%09blue/ssc:100521647%09blue/ssc:100511843%09blue/ssc:100627149%09blue/ssc:396851%09blue/ssc:396826%09blue/ssc:100511130%09blue/ssc:396943%09blue
Glutathione metabolism	KEGG PATHWAY	ssc00480	7	31	0.0622777	0.417539	ssc:100522018,GCLC,100522018:down|ssc:100521480,GSTK1,100521480:up|ssc:100153094,-,100153094:up|ssc:100624445,-,100624445:down|ssc:100154313,-,100154313:up|ssc:397682,-,397682:up|ssc:414408,ODC1,414408:down	http://www.genome.jp/kegg-bin/show_pathway?ssc00480/ssc:100154313%09red/ssc:100521480%09red/ssc:100624445%09blue/ssc:100522018%09blue/ssc:414408%09blue/ssc:100153094%09red/ssc:397682%09red
Salmonella infection	KEGG PATHWAY	ssc05132	11	59	0.0628929	0.417539	ssc:397094,IL1A,397094:down|ssc:414904,CXCL2,414904:down|ssc:397319,CASP1,397319:down|ssc:100627149,-,100627149:down|ssc:399541,TLR4,399541:down|ssc:100627693,RAB7B,100627693:down|ssc:396880,-,396880:down|ssc:397122,IL1B1,397122:down|ssc:100037938,CD14,100037938:down|ssc:100525528,-,100525528:down|ssc:100620730,-,100620730:down	http://www.genome.jp/kegg-bin/show_pathway?ssc05132/ssc:100627693%09blue/ssc:397319%09blue/ssc:100620730%09blue/ssc:399541%09blue/ssc:414904%09blue/ssc:397094%09blue/ssc:100525528%09blue/ssc:397122%09blue/ssc:100627149%09blue/ssc:396880%09blue/ssc:100037938%09blue
Hepatitis B	KEGG PATHWAY	ssc05161	17	105	0.066576	0.430045	ssc:100134969,NFATC2,100134969:down|ssc:100516296,EGR3,100516296:down|ssc:396826,FAS,396826:down|ssc:100623776,TICAM1,100623776:down|ssc:100513283,APAF1,100513283:down|ssc:100738857,-,100738857:down|ssc:654325,MMP9,654325:down|ssc:100516663,CREB3L1,100516663:down|ssc:396851,PIK3R5,396851:down|ssc:396665,-,396665:down|ssc:100157507,PTK2B,100157507:down|ssc:396880,-,396880:down|ssc:100038004,EGR2,1…	http://www.genome.jp/kegg-bin/show_pathway?ssc05161/ssc:100157507%09blue/ssc:100513283%09blue/ssc:100623776%09blue/ssc:100038004%09blue/ssc:100620730%09blue/ssc:399541%09blue/ssc:100516296%09blue/ssc:100152215%09blue/ssc:654325%09blue/ssc:100738857%09blue/ssc:100134969%09blue/ssc:396623%09blue/ssc:396880%09blue/ssc:100516663%09blue/ssc:396665%09blue/ssc:396826%09blue/ssc:396851%09blue
Systemic lupus erythematosus	KEGG PATHWAY	ssc05322	13	75	0.069219	0.435351	ssc:397441,CD86,397441:down|ssc:100037921,SLA-DQB1,100037921:down|ssc:100135050,SLA-DMB,100135050:down|ssc:100153386,SLA-DRB1,100153386:down|ssc:100153387,SLA-DQA,100153387:down|ssc:100157763,-,100157763:down|ssc:445528,HLA-DMA,445528:down|ssc:397106,IL10,397106:down|ssc:100621915,HIST1H2BN,100621915:down|ssc:100135040,SLA-DRA,100135040:down|ssc:100158121,-,100158121:down|ssc:100156932,-,10015693…	http://www.genome.jp/kegg-bin/show_pathway?ssc05322/ssc:100158121%09blue/ssc:100153387%09blue/ssc:100153386%09blue/ssc:397106%09blue/ssc:445464%09red/ssc:100037921%09blue/ssc:100621915%09blue/ssc:100156932%09blue/ssc:100135040%09blue/ssc:445528%09blue/ssc:100157763%09blue/ssc:397441%09blue/ssc:100135050%09blue
TGF-beta signaling pathway	KEGG PATHWAY	ssc04350	10	54	0.0762303	0.448707	ssc:100113425,BMP4,100113425:down|ssc:100738857,-,100738857:down|ssc:397093,INHBA,397093:down|ssc:449001,BAMBI,449001:up|ssc:396665,-,396665:down|ssc:654298,ID2,654298:down|ssc:100522839,ID1,100522839:up|ssc:100127483,BMPR2,100127483:down|ssc:100152462,ACVR1B,100152462:down|ssc:100521305,SMAD7,100521305:down	http://www.genome.jp/kegg-bin/show_pathway?ssc04350/ssc:100127483%09blue/ssc:100522839%09red/ssc:397093%09blue/ssc:100113425%09blue/ssc:449001%09red/ssc:100152462%09blue/ssc:100738857%09blue/ssc:654298%09blue/ssc:396665%09blue/ssc:100521305%09blue
NF-kappa B signaling pathway	KEGG PATHWAY	ssc04064	12	69	0.0773583	0.448707	ssc:100623776,TICAM1,100623776:down|ssc:396985,PLAU,396985:down|ssc:100156860,BCL2A1,100156860:down|ssc:100153411,BCL10B,100153411:down|ssc:399541,TLR4,399541:down|ssc:100627308,-,100627308:down|ssc:396880,-,396880:down|ssc:397122,IL1B1,397122:down|ssc:100037938,CD14,100037938:down|ssc:100038026,TNFSF13B,100038026:down|ssc:100517988,-,100517988:down|ssc:100620730,-,100620730:down	http://www.genome.jp/kegg-bin/show_pathway?ssc04064/ssc:100623776%09blue/ssc:100620730%09blue/ssc:399541%09blue/ssc:100153411%09blue/ssc:100038026%09blue/ssc:100627308%09blue/ssc:397122%09blue/ssc:100517988%09blue/ssc:396880%09blue/ssc:100156860%09blue/ssc:396985%09blue/ssc:100037938%09blue
Toll-like receptor signaling pathway	KEGG PATHWAY	ssc04620	13	77	0.0797993	0.448707	ssc:397441,CD86,397441:down|ssc:397087,SPP1,397087:down|ssc:100623776,TICAM1,100623776:down|ssc:396851,PIK3R5,396851:down|ssc:100627149,-,100627149:down|ssc:100515633,IRF5,100515633:down|ssc:396880,-,396880:down|ssc:397122,IL1B1,397122:down|ssc:100037938,CD14,100037938:down|ssc:397007,TLR9,397007:down|ssc:399541,TLR4,399541:down|ssc:100620730,-,100620730:down|ssc:396623,TLR2,396623:down	http://www.genome.jp/kegg-bin/show_pathway?ssc04620/ssc:100623776%09blue/ssc:396851%09blue/ssc:100627149%09blue/ssc:399541%09blue/ssc:397087%09blue/ssc:100515633%09blue/ssc:397122%09blue/ssc:397007%09blue/ssc:396623%09blue/ssc:396880%09blue/ssc:100037938%09blue/ssc:397441%09blue/ssc:100620730%09blue
Influenza A	KEGG PATHWAY	ssc05164	18	116	0.0801344	0.448707	ssc:397094,IL1A,397094:down|ssc:396826,FAS,396826:down|ssc:100623776,TICAM1,100623776:down|ssc:100156882,FURIN,100156882:down|ssc:397201,JAK2,397201:down|ssc:100037921,SLA-DQB1,100037921:down|ssc:100153386,SLA-DRB1,100153386:down|ssc:100153387,SLA-DQA,100153387:down|ssc:396851,PIK3R5,396851:down|ssc:445528,HLA-DMA,445528:down|ssc:397319,CASP1,397319:down|ssc:100302368,-,100302368:up|ssc:396880,-,…	http://www.genome.jp/kegg-bin/show_pathway?ssc05164/ssc:397201%09blue/ssc:100623776%09blue/ssc:445528%09blue/ssc:100153387%09blue/ssc:100620730%09blue/ssc:399541%09blue/ssc:397094%09blue/ssc:397319%09blue/ssc:100037921%09blue/ssc:100153386%09blue/ssc:397122%09blue/ssc:100302368%09red/ssc:396880%09blue/ssc:100135040%09blue/ssc:100156882%09blue/ssc:396851%09blue/ssc:396826%09blue/ssc:100135050%09bl…
Bladder cancer	KEGG PATHWAY	ssc05219	5	20	0.0807297	0.448707	ssc:100152215,-,100152215:down|ssc:396880,-,396880:down|ssc:100620730,-,100620730:down|ssc:397320,MMP1,397320:down|ssc:654325,MMP9,654325:down	http://www.genome.jp/kegg-bin/show_pathway?ssc05219/ssc:396880%09blue/ssc:397320%09blue/ssc:654325%09blue/ssc:100620730%09blue/ssc:100152215%09blue
Pancreatic secretion	KEGG PATHWAY	ssc04972	10	55	0.0828475	0.450012	ssc:100516581,PLCB4,100516581:down|ssc:100511161,PLA2G3,100511161:down|ssc:397458,SLC9A1,397458:down|ssc:100621609,CTRL,100621609:up|ssc:100627149,-,100627149:down|ssc:100302368,-,100302368:up|ssc:100525148,PLCB3,100525148:down|ssc:397476,-,397476:up|ssc:100155399,PNLIPRP1,100155399:up|ssc:100516960,SLC12A2,100516960:down	http://www.genome.jp/kegg-bin/show_pathway?ssc04972/ssc:100525148%09blue/ssc:100516960%09blue/ssc:100516581%09blue/ssc:100621609%09red/ssc:100155399%09red/ssc:100511161%09blue/ssc:397458%09blue/ssc:100302368%09red/ssc:100627149%09blue/ssc:397476%09red
Fructose and mannose metabolism	KEGG PATHWAY	ssc00051	5	21	0.0925476	0.49153	ssc:494561,HK2,494561:down|ssc:397038,FBP1,397038:down|ssc:396816,AKR1B1,396816:down|ssc:100154112,TIGAR,100154112:down|ssc:100522855,HK3,100522855:down	http://www.genome.jp/kegg-bin/show_pathway?ssc00051/ssc:396816%09blue/ssc:397038%09blue/ssc:494561%09blue/ssc:100522855%09blue/ssc:100154112%09blue
Arrhythmogenic right ventricular cardiomyopathy (ARVC)	KEGG PATHWAY	ssc05412	8	45	0.122936	0.638735	ssc:100623651,DSC2,100623651:down|ssc:100620392,DAG1,100620392:down|ssc:397285,ITGAV,397285:down|ssc:100520350,ITGA11,100520350:down|ssc:397063,ITGB3,397063:down|ssc:100517053,ITGA3,100517053:down|ssc:100240723,SGCA,100240723:up|ssc:100155091,ITGA5,100155091:down	http://www.genome.jp/kegg-bin/show_pathway?ssc05412/ssc:397063%09blue/ssc:100620392%09blue/ssc:100517053%09blue/ssc:100623651%09blue/ssc:100155091%09blue/ssc:397285%09blue/ssc:100520350%09blue/ssc:100240723%09red
Bacterial invasion of epithelial cells	KEGG PATHWAY	ssc05100	9	53	0.127047	0.64605	ssc:396851,PIK3R5,396851:down|ssc:100521992,HCLS1,100521992:down|ssc:100522109,ELMO1,100522109:down|ssc:100515873,SEPT6,100515873:down|ssc:100627149,-,100627149:down|ssc:100621690,CBLB,100621690:down|ssc:100153921,DNM1,100153921:up|ssc:397620,FN1,397620:down|ssc:100155091,ITGA5,100155091:down	http://www.genome.jp/kegg-bin/show_pathway?ssc05100/ssc:100522109%09blue/ssc:397620%09blue/ssc:100621690%09blue/ssc:100521992%09blue/ssc:100515873%09blue/ssc:100627149%09blue/ssc:100155091%09blue/ssc:100153921%09red/ssc:396851%09blue
Leukocyte transendothelial migration	KEGG PATHWAY	ssc04670	13	86	0.139515	0.694669	ssc:100127138,F11R,100127138:down|ssc:654325,MMP9,654325:down|ssc:100152055,NCF4,100152055:down|ssc:396851,PIK3R5,396851:down|ssc:100153752,CLDN10,100153752:up|ssc:100513215,RHOH,100513215:down|ssc:100142665,NCF2,100142665:down|ssc:100627149,-,100627149:down|ssc:100157507,PTK2B,100157507:down|ssc:100625166,CLDN1,100625166:down|ssc:396943,ITGB2,396943:down|ssc:100519821,VAV1,100519821:down|ssc:100…	http://www.genome.jp/kegg-bin/show_pathway?ssc04670/ssc:100152055%09blue/ssc:100127138%09blue/ssc:654325%09blue/ssc:100157507%09blue/ssc:100153752%09red/ssc:100519821%09blue/ssc:100513215%09blue/ssc:100621675%09blue/ssc:100142665%09blue/ssc:100627149%09blue/ssc:396851%09blue/ssc:100625166%09blue/ssc:396943%09blue
Fc gamma R-mediated phagocytosis	KEGG PATHWAY	ssc04666	9	55	0.146436	0.706621	ssc:100621675,-,100621675:down|ssc:396851,PIK3R5,396851:down|ssc:100627149,-,100627149:down|ssc:613131,FCGR2B,613131:down|ssc:100156359,LIMK2,100156359:down|ssc:396902,MYO10,396902:down|ssc:100522631,PTPRC,100522631:down|ssc:100519821,VAV1,100519821:down|ssc:100519446,PLD1,100519446:down	http://www.genome.jp/kegg-bin/show_pathway?ssc04666/ssc:100519446%09blue/ssc:100519821%09blue/ssc:396902%09blue/ssc:100621675%09blue/ssc:613131%09blue/ssc:100522631%09blue/ssc:100627149%09blue/ssc:100156359%09blue/ssc:396851%09blue
Pentose phosphate pathway	KEGG PATHWAY	ssc00030	4	18	0.148009	0.706621	ssc:100038014,RPIA,100038014:down|ssc:397038,FBP1,397038:down|ssc:100522261,-,100522261:down|ssc:100127150,TKT,100127150:down	http://www.genome.jp/kegg-bin/show_pathway?ssc00030/ssc:100127150%09blue/ssc:100038014%09blue/ssc:100522261%09blue/ssc:397038%09blue
Glycolysis / Gluconeogenesis	KEGG PATHWAY	ssc00010	7	40	0.150785	0.706621	ssc:100514142,GCK,100514142:up|ssc:100522855,HK3,100522855:down|ssc:100522261,-,100522261:down|ssc:100154828,ACSS1,100154828:down|ssc:100157750,ENO2,100157750:up|ssc:494561,HK2,494561:down|ssc:397038,FBP1,397038:down	http://www.genome.jp/kegg-bin/show_pathway?ssc00010/ssc:100514142%09red/ssc:397038%09blue/ssc:100522855%09blue/ssc:100157750%09red/ssc:100522261%09blue/ssc:100154828%09blue/ssc:494561%09blue
Transcriptional misregulation in cancer	KEGG PATHWAY	ssc05202	15	105	0.159639	0.733725	ssc:100512633,RUNX1,100512633:down|ssc:397441,CD86,397441:down|ssc:654325,MMP9,654325:down|ssc:414912,SPI1,414912:down|ssc:396985,PLAU,396985:down|ssc:100152215,-,100152215:down|ssc:100156860,BCL2A1,100156860:down|ssc:100525104,REL,100525104:down|ssc:654298,ID2,654298:down|ssc:396880,-,396880:down|ssc:100156210,ETV7,100156210:down|ssc:100037938,CD14,100037938:down|ssc:100628112,IL1R2,100628112:do…	http://www.genome.jp/kegg-bin/show_pathway?ssc05202/ssc:100628112%09blue/ssc:100620730%09blue/ssc:654298%09blue/ssc:414912%09blue/ssc:100152215%09blue/ssc:654325%09blue/ssc:100512633%09blue/ssc:100525104%09blue/ssc:396985%09blue/ssc:396880%09blue/ssc:100156860%09blue/ssc:100156210%09blue/ssc:397441%09blue/ssc:100517086%09blue/ssc:100037938%09blue
Prion diseases	KEGG PATHWAY	ssc05020	5	26	0.163394	0.736817	ssc:397094,IL1A,397094:down|ssc:407060,HSPA5,407060:down|ssc:100515564,NCAM1,100515564:down|ssc:100514785,LAMC1,100514785:down|ssc:397122,IL1B1,397122:down	http://www.genome.jp/kegg-bin/show_pathway?ssc05020/ssc:100514785%09blue/ssc:397122%09blue/ssc:407060%09blue/ssc:100515564%09blue/ssc:397094%09blue
Steroid biosynthesis	KEGG PATHWAY	ssc00100	4	19	0.166604	0.737375	ssc:100515544,SOAT2,100515544:up|ssc:100312968,EBP,100312968:up|ssc:100312971,FDFT1,100312971:up|ssc:100625332,-,100625332:down	http://www.genome.jp/kegg-bin/show_pathway?ssc00100/ssc:100625332%09blue/ssc:100515544%09red/ssc:100312971%09red/ssc:100312968%09red
Regulation of actin cytoskeleton	KEGG PATHWAY	ssc04810	17	125	0.183998	0.793522	ssc:397285,ITGAV,397285:down|ssc:100520350,ITGA11,100520350:down|ssc:396851,PIK3R5,396851:down|ssc:100621675,-,100621675:down|ssc:100513228,BAIAP2,100513228:down|ssc:397458,SLC9A1,397458:down|ssc:100627149,-,100627149:down|ssc:397063,ITGB3,397063:down|ssc:397497,FGF1,397497:down|ssc:100156359,LIMK2,100156359:down|ssc:100517053,ITGA3,100517053:down|ssc:100037938,CD14,100037938:down|ssc:397620,FN1,…	http://www.genome.jp/kegg-bin/show_pathway?ssc04810/ssc:397620%09blue/ssc:397063%09blue/ssc:100037938%09blue/ssc:100522824%09blue/ssc:100513228%09blue/ssc:100519821%09blue/ssc:100156359%09blue/ssc:100621675%09blue/ssc:397458%09blue/ssc:100627149%09blue/ssc:100517053%09blue/ssc:397497%09blue/ssc:396851%09blue/ssc:100155091%09blue/ssc:397285%09blue/ssc:100520350%09blue/ssc:396943%09blue
Axon guidance	KEGG PATHWAY	ssc04360	11	75	0.18593	0.793522	ssc:100134969,NFATC2,100134969:down|ssc:100621675,-,100621675:down|ssc:100153801,NGEF,100153801:down|ssc:733600,UNC5B,733600:down|ssc:100627149,-,100627149:down|ssc:100155631,FES,100155631:down|ssc:100156359,LIMK2,100156359:down|ssc:100522873,EPHA2,100522873:down|ssc:100135673,EFNB2,100135673:down|ssc:100153200,SEMA3B,100153200:down|ssc:100517310,ROBO1,100517310:down	http://www.genome.jp/kegg-bin/show_pathway?ssc04360/ssc:100156359%09blue/ssc:733600%09blue/ssc:100621675%09blue/ssc:100134969%09blue/ssc:100155631%09blue/ssc:100153200%09blue/ssc:100522873%09blue/ssc:100627149%09blue/ssc:100135673%09blue/ssc:100153801%09blue/ssc:100517310%09blue
Platelet activation	KEGG PATHWAY	ssc04611	11	77	0.206234	0.863297	ssc:100516581,PLCB4,100516581:down|ssc:396851,PIK3R5,396851:down|ssc:503666,P2RY1,503666:down|ssc:100517988,-,100517988:down|ssc:397063,ITGB3,397063:down|ssc:397112,TBXAS1,397112:down|ssc:100627308,-,100627308:down|ssc:100525148,PLCB3,100525148:down|ssc:397406,FCER1G,397406:down|ssc:100522824,GNA13,100522824:down|ssc:100511843,LCP2,100511843:down	http://www.genome.jp/kegg-bin/show_pathway?ssc04611/ssc:100525148%09blue/ssc:397063%09blue/ssc:100522824%09blue/ssc:503666%09blue/ssc:100516581%09blue/ssc:397406%09blue/ssc:100627308%09blue/ssc:100517988%09blue/ssc:397112%09blue/ssc:396851%09blue/ssc:100511843%09blue
Lysosome	KEGG PATHWAY	ssc04142	12	86	0.212564	0.863297	ssc:100522387,CTSC,100522387:up|ssc:100624193,LAPTM5,100624193:down|ssc:396969,CTSH,396969:down|ssc:100515283,GM2A,100515283:down|ssc:397214,IGF2R,397214:down|ssc:100144519,GUSB,100144519:down|ssc:100152548,CD164,100152548:up|ssc:100415928,GLA,100415928:down|ssc:397472,ATP6V1H,397472:down|ssc:100519685,NAGLU,100519685:down|ssc:100124381,NEU1,100124381:down|ssc:100515919,CTSL,100515919:down	http://www.genome.jp/kegg-bin/show_pathway?ssc04142/ssc:100515919%09blue/ssc:397214%09blue/ssc:100522387%09red/ssc:100624193%09blue/ssc:100519685%09blue/ssc:100415928%09blue/ssc:100515283%09blue/ssc:397472%09blue/ssc:396969%09blue/ssc:100152548%09red/ssc:100124381%09blue/ssc:100144519%09blue
VEGF signaling pathway	KEGG PATHWAY	ssc04370	6	37	0.216401	0.863297	ssc:100134969,NFATC2,100134969:down|ssc:100621675,-,100621675:down|ssc:396851,PIK3R5,396851:down|ssc:100627149,-,100627149:down|ssc:397311,KDR,397311:down|ssc:100521986,MAPKAPK2,100521986:down	http://www.genome.jp/kegg-bin/show_pathway?ssc04370/ssc:100134969%09blue/ssc:100621675%09blue/ssc:100521986%09blue/ssc:100627149%09blue/ssc:397311%09blue/ssc:396851%09blue
Sphingolipid signaling pathway	KEGG PATHWAY	ssc04071	11	78	0.216727	0.863297	ssc:100516581,PLCB4,100516581:down|ssc:100621675,-,100621675:down|ssc:396851,PIK3R5,396851:down|ssc:100627149,-,100627149:down|ssc:397166,MS4A2,397166:down|ssc:100154607,S1PR3,100154607:down|ssc:100525148,PLCB3,100525148:down|ssc:100518796,SGMS2,100518796:down|ssc:397406,FCER1G,397406:down|ssc:100522824,GNA13,100522824:down|ssc:100519446,PLD1,100519446:down	http://www.genome.jp/kegg-bin/show_pathway?ssc04071/ssc:100525148%09blue/ssc:100519446%09blue/ssc:100522824%09blue/ssc:100516581%09blue/ssc:397166%09blue/ssc:100154607%09blue/ssc:100621675%09blue/ssc:397406%09blue/ssc:100518796%09blue/ssc:100627149%09blue/ssc:396851%09blue
Adherens junction	KEGG PATHWAY	ssc04520	7	46	0.230656	0.867116	ssc:396665,-,396665:down|ssc:100621675,-,100621675:down|ssc:100738857,-,100738857:down|ssc:100513228,BAIAP2,100513228:down|ssc:100627149,-,100627149:down|ssc:396667,PTPN1,396667:down|ssc:100524973,PTPRJ,100524973:down	http://www.genome.jp/kegg-bin/show_pathway?ssc04520/ssc:100513228%09blue/ssc:100621675%09blue/ssc:100524973%09blue/ssc:100627149%09blue/ssc:100738857%09blue/ssc:396665%09blue/ssc:396667%09blue
Rap1 signaling pathway	KEGG PATHWAY	ssc04015	17	131	0.232144	0.867116	ssc:100516581,PLCB4,100516581:down|ssc:397063,ITGB3,397063:down|ssc:100621675,-,100621675:down|ssc:503666,P2RY1,503666:down|ssc:396851,PIK3R5,396851:down|ssc:100627149,-,100627149:down|ssc:397311,KDR,397311:down|ssc:100525148,PLCB3,100525148:down|ssc:100151957,PARD6B,100151957:down|ssc:100522839,ID1,100522839:up|ssc:100522873,EPHA2,100522873:down|ssc:100517086,CSF1R,100517086:down|ssc:100524790,R…	http://www.genome.jp/kegg-bin/show_pathway?ssc04015/ssc:100525148%09blue/ssc:100151957%09blue/ssc:397063%09blue/ssc:503666%09blue/ssc:100522839%09red/ssc:396851%09blue/ssc:100517086%09blue/ssc:100516581%09blue/ssc:100522873%09blue/ssc:100520112%09blue/ssc:100524790%09blue/ssc:100511843%09blue/ssc:100627149%09blue/ssc:397497%09blue/ssc:397311%09blue/ssc:100621675%09blue/ssc:396943%09blue
Starch and sucrose metabolism	KEGG PATHWAY	ssc00500	6	38	0.232152	0.867116	ssc:100514142,GCK,100514142:up|ssc:100037271,ENPP1,100037271:down|ssc:100522855,HK3,100522855:down|ssc:100522261,-,100522261:down|ssc:100144519,GUSB,100144519:down|ssc:494561,HK2,494561:down	http://www.genome.jp/kegg-bin/show_pathway?ssc00500/ssc:100514142%09red/ssc:100037271%09blue/ssc:100522855%09blue/ssc:100522261%09blue/ssc:100144519%09blue/ssc:494561%09blue
T cell receptor signaling pathway	KEGG PATHWAY	ssc04660	10	71	0.232198	0.867116	ssc:100134969,NFATC2,100134969:down|ssc:396851,PIK3R5,396851:down|ssc:100153411,BCL10B,100153411:down|ssc:100621690,CBLB,100621690:down|ssc:397106,IL10,397106:down|ssc:100519821,VAV1,100519821:down|ssc:100522631,PTPRC,100522631:down|ssc:404704,CD4,404704:down|ssc:100511843,LCP2,100511843:down|ssc:100153486,NFKBIE,100153486:down	http://www.genome.jp/kegg-bin/show_pathway?ssc04660/ssc:404704%09blue/ssc:100519821%09blue/ssc:100153486%09blue/ssc:397106%09blue/ssc:100134969%09blue/ssc:100522631%09blue/ssc:100511843%09blue/ssc:100621690%09blue/ssc:100153411%09blue/ssc:396851%09blue
Pantothenate and CoA biosynthesis	KEGG PATHWAY	ssc00770	3	15	0.238309	0.876243	ssc:100154650,PANK1,100154650:down|ssc:397246,VNN1,397246:up|ssc:100037271,ENPP1,100037271:down	http://www.genome.jp/kegg-bin/show_pathway?ssc00770/ssc:100154650%09blue/ssc:397246%09red/ssc:100037271%09blue
Glycerolipid metabolism	KEGG PATHWAY	ssc00561	6	39	0.248245	0.877018	ssc:396816,AKR1B1,396816:down|ssc:100152017,MBOAT1,100152017:down|ssc:100170845,-,100170845:down|ssc:100233182,GK,100233182:down|ssc:100415928,GLA,100415928:down|ssc:100155399,PNLIPRP1,100155399:up	http://www.genome.jp/kegg-bin/show_pathway?ssc00561/ssc:100233182%09blue/ssc:396816%09blue/ssc:100170845%09blue/ssc:100155399%09red/ssc:100415928%09blue/ssc:100152017%09blue
Amyotrophic lateral sclerosis (ALS)	KEGG PATHWAY	ssc05014	5	31	0.249659	0.877018	ssc:100524985,TOMM40L,100524985:up|ssc:397319,CASP1,397319:down|ssc:100625407,NEFM,100625407:down|ssc:100627149,-,100627149:down|ssc:100513283,APAF1,100513283:down	http://www.genome.jp/kegg-bin/show_pathway?ssc05014/ssc:100513283%09blue/ssc:100524985%09red/ssc:100625407%09blue/ssc:397319%09blue/ssc:100627149%09blue
Primary immunodeficiency	KEGG PATHWAY	ssc05340	5	31	0.249659	0.877018	ssc:100522631,PTPRC,100522631:down|ssc:100627308,-,100627308:down|ssc:404704,CD4,404704:down|ssc:100517988,-,100517988:down|ssc:100271930,IL7R,100271930:down	http://www.genome.jp/kegg-bin/show_pathway?ssc05340/ssc:100627308%09blue/ssc:100522631%09blue/ssc:404704%09blue/ssc:100517988%09blue/ssc:100271930%09blue
Pathways in cancer	KEGG PATHWAY	ssc05200	29	241	0.258767	0.877018	ssc:414911,EDNRB,414911:down|ssc:654325,MMP9,654325:down|ssc:397320,MMP1,397320:down|ssc:414912,SPI1,414912:down|ssc:396665,-,396665:down|ssc:397497,FGF1,397497:down|ssc:100152368,EGLN3,100152368:down|ssc:100152215,-,100152215:down|ssc:100621675,-,100621675:down|ssc:396826,FAS,396826:down|ssc:100738857,-,100738857:down|ssc:100514785,LAMC1,100514785:down|ssc:396880,-,396880:down|ssc:397620,FN1,397…	http://www.genome.jp/kegg-bin/show_pathway?ssc05200/ssc:100516581%09blue/ssc:100621675%09blue/ssc:100113425%09blue/ssc:100514785%09blue/ssc:397497%09blue/ssc:100517053%09blue/ssc:100525148%09blue/ssc:100152368%09blue/ssc:100627149%09blue/ssc:100738857%09blue/ssc:100512633%09blue/ssc:396665%09blue/ssc:397285%09blue/ssc:100517086%09blue/ssc:100127164%09blue/ssc:100620730%09blue/ssc:100522824%09blue…
Chronic myeloid leukemia	KEGG PATHWAY	ssc05220	6	40	0.264643	0.877018	ssc:100512633,RUNX1,100512633:down|ssc:396851,PIK3R5,396851:down|ssc:100738857,-,100738857:down|ssc:396665,-,396665:down|ssc:100621690,CBLB,100621690:down|ssc:100152215,-,100152215:down	http://www.genome.jp/kegg-bin/show_pathway?ssc05220/ssc:100621690%09blue/ssc:100152215%09blue/ssc:100738857%09blue/ssc:100512633%09blue/ssc:396665%09blue/ssc:396851%09blue
Nicotinate and nicotinamide metabolism	KEGG PATHWAY	ssc00760	3	16	0.264664	0.877018	ssc:100157138,PNP,100157138:down|ssc:100037271,ENPP1,100037271:down|ssc:595123,NAMPT,595123:up	http://www.genome.jp/kegg-bin/show_pathway?ssc00760/ssc:595123%09red/ssc:100157138%09blue/ssc:100037271%09blue
TNF signaling pathway	KEGG PATHWAY	ssc04668	10	74	0.267742	0.877018	ssc:414904,CXCL2,414904:down|ssc:396826,FAS,396826:down|ssc:654325,MMP9,654325:down|ssc:396851,PIK3R5,396851:down|ssc:399503,LIF,399503:down|ssc:396915,EDN1,396915:down|ssc:100516663,CREB3L1,100516663:down|ssc:100621027,CX3CL1,100621027:down|ssc:100525528,-,100525528:down|ssc:397122,IL1B1,397122:down	http://www.genome.jp/kegg-bin/show_pathway?ssc04668/ssc:100516663%09blue/ssc:399503%09blue/ssc:396915%09blue/ssc:414904%09blue/ssc:654325%09blue/ssc:100525528%09blue/ssc:397122%09blue/ssc:100621027%09blue/ssc:396826%09blue/ssc:396851%09blue
SNARE interactions in vesicular transport	KEGG PATHWAY	ssc04130	5	32	0.26817	0.877018	ssc:100512594,STX1A,100512594:down|ssc:100517081,USE1,100517081:up|ssc:404692,VTI1B,404692:up|ssc:100152253,STX11,100152253:down|ssc:100520886,STX3,100520886:down	http://www.genome.jp/kegg-bin/show_pathway?ssc04130/ssc:404692%09red/ssc:100152253%09blue/ssc:100520886%09blue/ssc:100517081%09red/ssc:100512594%09blue
HIF-1 signaling pathway	KEGG PATHWAY	ssc04066	9	66	0.27502	0.877018	ssc:396851,PIK3R5,396851:down|ssc:100522855,HK3,100522855:down|ssc:396915,EDN1,396915:down|ssc:100152368,EGLN3,100152368:down|ssc:100157750,ENO2,100157750:up|ssc:494561,HK2,494561:down|ssc:100152215,-,100152215:down|ssc:399541,TLR4,399541:down|ssc:396696,HIF1A,396696:down	http://www.genome.jp/kegg-bin/show_pathway?ssc04066/ssc:399541%09blue/ssc:396915%09blue/ssc:100152215%09blue/ssc:100522855%09blue/ssc:100157750%09red/ssc:396696%09blue/ssc:494561%09blue/ssc:100152368%09blue/ssc:396851%09blue
Central carbon metabolism in cancer	KEGG PATHWAY	ssc05230	6	41	0.281305	0.877018	ssc:100514142,GCK,100514142:up|ssc:396851,PIK3R5,396851:down|ssc:100522855,HK3,100522855:down|ssc:494561,HK2,494561:down|ssc:100154112,TIGAR,100154112:down|ssc:396696,HIF1A,396696:down	http://www.genome.jp/kegg-bin/show_pathway?ssc05230/ssc:100514142%09red/ssc:100522855%09blue/ssc:396696%09blue/ssc:100154112%09blue/ssc:494561%09blue/ssc:396851%09blue
Focal adhesion	KEGG PATHWAY	ssc04510	15	119	0.282475	0.877018	ssc:397087,SPP1,397087:down|ssc:100520350,ITGA11,100520350:down|ssc:396851,PIK3R5,396851:down|ssc:100621675,-,100621675:down|ssc:100514785,LAMC1,100514785:down|ssc:100627149,-,100627149:down|ssc:397311,KDR,397311:down|ssc:100520379,PARVG,100520379:down|ssc:100517053,ITGA3,100517053:down|ssc:397063,ITGB3,397063:down|ssc:397620,FN1,397620:down|ssc:397285,ITGAV,397285:down|ssc:397137,IBSP,397137:dow…	http://www.genome.jp/kegg-bin/show_pathway?ssc04510/ssc:397620%09blue/ssc:397063%09blue/ssc:100517053%09blue/ssc:100519821%09blue/ssc:397087%09blue/ssc:100621675%09blue/ssc:397285%09blue/ssc:397137%09blue/ssc:100627149%09blue/ssc:100514785%09blue/ssc:397311%09blue/ssc:100155091%09blue/ssc:100520379%09blue/ssc:100520350%09blue/ssc:396851%09blue
Glycerophospholipid metabolism	KEGG PATHWAY	ssc00564	8	58	0.282554	0.877018	ssc:100170845,-,100170845:down|ssc:733582,CDS1,733582:down|ssc:100511161,PLA2G3,100511161:down|ssc:100152017,MBOAT1,100152017:down|ssc:100512162,EPT1,100512162:down|ssc:100524095,PLD4,100524095:down|ssc:397348,GPD2,397348:down|ssc:100519446,PLD1,100519446:down	http://www.genome.jp/kegg-bin/show_pathway?ssc00564/ssc:733582%09blue/ssc:100519446%09blue/ssc:100170845%09blue/ssc:100511161%09blue/ssc:100524095%09blue/ssc:100512162%09blue/ssc:397348%09blue/ssc:100152017%09blue
Protein digestion and absorption	KEGG PATHWAY	ssc04974	8	59	0.296719	0.909176	ssc:100511536,MME,100511536:down|ssc:397492,DPP4,397492:down|ssc:100144589,-,100144589:down|ssc:100621609,CTRL,100621609:up|ssc:445538,XPNPEP2,445538:down|ssc:100302368,-,100302368:up|ssc:397003,SLC1A1,397003:down|ssc:397476,-,397476:up	http://www.genome.jp/kegg-bin/show_pathway?ssc04974/ssc:100511536%09blue/ssc:100621609%09red/ssc:100144589%09blue/ssc:397003%09blue/ssc:100302368%09red/ssc:397492%09blue/ssc:445538%09blue/ssc:397476%09red
Fat digestion and absorption	KEGG PATHWAY	ssc04975	4	26	0.313168	0.947432	ssc:397407,CLPS,397407:up|ssc:397681,APOA4,397681:down|ssc:100155399,PNLIPRP1,100155399:up|ssc:100511161,PLA2G3,100511161:down	http://www.genome.jp/kegg-bin/show_pathway?ssc04975/ssc:100511161%09blue/ssc:397407%09red/ssc:397681%09blue/ssc:100155399%09red
NOD-like receptor signaling pathway	KEGG PATHWAY	ssc04621	5	35	0.325192	0.959517	ssc:397319,CASP1,397319:down|ssc:100517333,MEFV,100517333:down|ssc:396880,-,396880:down|ssc:397122,IL1B1,397122:down|ssc:100620730,-,100620730:down	http://www.genome.jp/kegg-bin/show_pathway?ssc04621/ssc:100517333%09blue/ssc:397122%09blue/ssc:100620730%09blue/ssc:397319%09blue/ssc:396880%09blue
Metabolism of xenobiotics by cytochrome P450	KEGG PATHWAY	ssc00980	5	35	0.325192	0.959517	ssc:397337,DHDH,397337:up|ssc:100153094,-,100153094:up|ssc:100154313,-,100154313:up|ssc:100521480,GSTK1,100521480:up|ssc:397682,-,397682:up	http://www.genome.jp/kegg-bin/show_pathway?ssc00980/ssc:397337%09red/ssc:100153094%09red/ssc:100154313%09red/ssc:397682%09red/ssc:100521480%09red
Synaptic vesicle cycle	KEGG PATHWAY	ssc04721	6	44	0.332483	0.969066	ssc:100523998,-,100523998:down|ssc:100512594,STX1A,100512594:down|ssc:100520886,STX3,100520886:down|ssc:100153921,DNM1,100153921:up|ssc:100517927,STXBP1,100517927:down|ssc:397472,ATP6V1H,397472:down	http://www.genome.jp/kegg-bin/show_pathway?ssc04721/ssc:100517927%09blue/ssc:100512594%09blue/ssc:100520886%09blue/ssc:397472%09blue/ssc:100523998%09blue/ssc:100153921%09red
Dilated cardiomyopathy	KEGG PATHWAY	ssc05414	7	53	0.337109	0.97021	ssc:100620392,DAG1,100620392:down|ssc:397285,ITGAV,397285:down|ssc:100520350,ITGA11,100520350:down|ssc:397063,ITGB3,397063:down|ssc:100517053,ITGA3,100517053:down|ssc:100240723,SGCA,100240723:up|ssc:100155091,ITGA5,100155091:down	http://www.genome.jp/kegg-bin/show_pathway?ssc05414/ssc:397063%09blue/ssc:100620392%09blue/ssc:100155091%09blue/ssc:100517053%09blue/ssc:397285%09blue/ssc:100520350%09blue/ssc:100240723%09red
Colorectal cancer	KEGG PATHWAY	ssc05210	5	36	0.344512	0.97021	ssc:100621675,-,100621675:down|ssc:396851,PIK3R5,396851:down|ssc:100627149,-,100627149:down|ssc:100738857,-,100738857:down|ssc:396665,-,396665:down	http://www.genome.jp/kegg-bin/show_pathway?ssc05210/ssc:100738857%09blue/ssc:396665%09blue/ssc:100621675%09blue/ssc:100627149%09blue/ssc:396851%09blue
Glycosphingolipid biosynthesis - lacto and neolacto series	KEGG PATHWAY	ssc00601	3	19	0.345054	0.97021	ssc:100623864,-,100623864:down|ssc:397599,B3GNT5,397599:down|ssc:100524195,-,100524195:down	http://www.genome.jp/kegg-bin/show_pathway?ssc00601/ssc:397599%09blue/ssc:100623864%09blue/ssc:100524195%09blue
Glycosaminoglycan degradation	KEGG PATHWAY	ssc00531	2	11	0.351194	0.975994	ssc:100144519,GUSB,100144519:down|ssc:100519685,NAGLU,100519685:down	http://www.genome.jp/kegg-bin/show_pathway?ssc00531/ssc:100519685%09blue/ssc:100144519%09blue
Endocrine and other factor-regulated calcium reabsorption	KEGG PATHWAY	ssc04961	4	28	0.357605	0.982385	ssc:100516581,PLCB4,100516581:down|ssc:100525148,PLCB3,100525148:down|ssc:396628,VDR,396628:down|ssc:100153921,DNM1,100153921:up	http://www.genome.jp/kegg-bin/show_pathway?ssc04961/ssc:100525148%09blue/ssc:396628%09blue/ssc:100153921%09red/ssc:100516581%09blue
Pancreatic cancer	KEGG PATHWAY	ssc05212	5	37	0.363901	0.988323	ssc:100621675,-,100621675:down|ssc:396851,PIK3R5,396851:down|ssc:100627149,-,100627149:down|ssc:100738857,-,100738857:down|ssc:396665,-,396665:down	http://www.genome.jp/kegg-bin/show_pathway?ssc05212/ssc:100738857%09blue/ssc:396665%09blue/ssc:100621675%09blue/ssc:100627149%09blue/ssc:396851%09blue
Hypertrophic cardiomyopathy (HCM)	KEGG PATHWAY	ssc05410	7	55	0.368853	0.990516	ssc:100620392,DAG1,100620392:down|ssc:397285,ITGAV,397285:down|ssc:100520350,ITGA11,100520350:down|ssc:397063,ITGB3,397063:down|ssc:100517053,ITGA3,100517053:down|ssc:100240723,SGCA,100240723:up|ssc:100155091,ITGA5,100155091:down	http://www.genome.jp/kegg-bin/show_pathway?ssc05410/ssc:397063%09blue/ssc:100620392%09blue/ssc:100155091%09blue/ssc:100517053%09blue/ssc:397285%09blue/ssc:100520350%09blue/ssc:100240723%09red
Measles	KEGG PATHWAY	ssc05162	11	92	0.380622	0.999929	ssc:397094,IL1A,397094:down|ssc:100170134,CD209,100170134:down|ssc:396851,PIK3R5,396851:down|ssc:397201,JAK2,397201:down|ssc:613131,FCGR2B,613131:down|ssc:100525674,RAB9B,100525674:down|ssc:396826,FAS,396826:down|ssc:397007,TLR9,397007:down|ssc:399541,TLR4,399541:down|ssc:397122,IL1B1,397122:down|ssc:396623,TLR2,396623:down	http://www.genome.jp/kegg-bin/show_pathway?ssc05162/ssc:397201%09blue/ssc:100170134%09blue/ssc:100525674%09blue/ssc:399541%09blue/ssc:397094%09blue/ssc:613131%09blue/ssc:397122%09blue/ssc:397007%09blue/ssc:396623%09blue/ssc:396826%09blue/ssc:396851%09blue
Drug metabolism - cytochrome P450	KEGG PATHWAY	ssc00982	5	38	0.383309	0.999929	ssc:397132,FMO1,397132:down|ssc:100153094,-,100153094:up|ssc:100154313,-,100154313:up|ssc:100521480,GSTK1,100521480:up|ssc:397682,-,397682:up	http://www.genome.jp/kegg-bin/show_pathway?ssc00982/ssc:397132%09blue/ssc:100153094%09red/ssc:100154313%09red/ssc:397682%09red/ssc:100521480%09red
Amino sugar and nucleotide sugar metabolism	KEGG PATHWAY	ssc00520	5	39	0.402689	0.999929	ssc:397209,GFPT1,397209:down|ssc:494561,HK2,494561:down|ssc:100514142,GCK,100514142:up|ssc:100522261,-,100522261:down|ssc:100522855,HK3,100522855:down	http://www.genome.jp/kegg-bin/show_pathway?ssc00520/ssc:397209%09blue/ssc:100514142%09red/ssc:494561%09blue/ssc:100522261%09blue/ssc:100522855%09blue
PI3K-Akt signaling pathway	KEGG PATHWAY	ssc04151	24	215	0.406726	0.999929	ssc:397201,JAK2,397201:down|ssc:397614,IL4R,397614:down|ssc:100627149,-,100627149:down|ssc:397497,FGF1,397497:down|ssc:100522873,EPHA2,100522873:down|ssc:100152215,-,100152215:down|ssc:399541,TLR4,399541:down|ssc:100514785,LAMC1,100514785:down|ssc:397620,FN1,397620:down|ssc:100155091,ITGA5,100155091:down|ssc:397087,SPP1,397087:down|ssc:100520350,ITGA11,100520350:down|ssc:100516663,CREB3L1,1005166…	http://www.genome.jp/kegg-bin/show_pathway?ssc04151/ssc:100522873%09blue/ssc:100514785%09blue/ssc:397497%09blue/ssc:100517053%09blue/ssc:100520350%09blue/ssc:397614%09blue/ssc:397201%09blue/ssc:397063%09blue/ssc:100271930%09blue/ssc:100627149%09blue/ssc:397311%09blue/ssc:100155091%09blue/ssc:397285%09blue/ssc:100516663%09blue/ssc:396623%09blue/ssc:399541%09blue/ssc:100517086%09blue/ssc:397087%09b…
Choline metabolism in cancer	KEGG PATHWAY	ssc05231	7	58	0.416724	0.999929	ssc:100621675,-,100621675:down|ssc:396851,PIK3R5,396851:down|ssc:100627149,-,100627149:down|ssc:100152140,SLC44A1,100152140:up|ssc:100142677,SLC22A3,100142677:down|ssc:396696,HIF1A,396696:down|ssc:100519446,PLD1,100519446:down	http://www.genome.jp/kegg-bin/show_pathway?ssc05231/ssc:100519446%09blue/ssc:100627149%09blue/ssc:100152140%09red/ssc:100621675%09blue/ssc:100142677%09blue/ssc:396696%09blue/ssc:396851%09blue
ErbB signaling pathway	KEGG PATHWAY	ssc04012	6	49	0.419468	0.999929	ssc:397564,HBEGF,397564:down|ssc:396851,PIK3R5,396851:down|ssc:100621690,CBLB,100621690:down|ssc:100627019,ABL2,100627019:down|ssc:100152215,-,100152215:down|ssc:100620969,EREG,100620969:down	http://www.genome.jp/kegg-bin/show_pathway?ssc04012/ssc:100627019%09blue/ssc:100621690%09blue/ssc:100152215%09blue/ssc:397564%09blue/ssc:100620969%09blue/ssc:396851%09blue
Glycosphingolipid biosynthesis - globo series	KEGG PATHWAY	ssc00603	2	13	0.420857	0.999929	ssc:397634,B3GALNT1,397634:up|ssc:100415928,GLA,100415928:down	http://www.genome.jp/kegg-bin/show_pathway?ssc00603/ssc:100415928%09blue/ssc:397634%09red
Ether lipid metabolism	KEGG PATHWAY	ssc00565	4	31	0.423985	0.999929	ssc:100511161,PLA2G3,100511161:down|ssc:100512162,EPT1,100512162:down|ssc:100524095,PLD4,100524095:down|ssc:100519446,PLD1,100519446:down	http://www.genome.jp/kegg-bin/show_pathway?ssc00565/ssc:100524095%09blue/ssc:100511161%09blue/ssc:100512162%09blue/ssc:100519446%09blue
Drug metabolism - other enzymes	KEGG PATHWAY	ssc00983	3	22	0.424602	0.999929	ssc:100144519,GUSB,100144519:down|ssc:100515954,CDA,100515954:down|ssc:100157630,TPMT,100157630:down	http://www.genome.jp/kegg-bin/show_pathway?ssc00983/ssc:100515954%09blue/ssc:100144519%09blue/ssc:100157630%09blue
Pentose and glucuronate interconversions	KEGG PATHWAY	ssc00040	3	22	0.424602	0.999929	ssc:100144519,GUSB,100144519:down|ssc:397337,DHDH,397337:up|ssc:396816,AKR1B1,396816:down	http://www.genome.jp/kegg-bin/show_pathway?ssc00040/ssc:397337%09red/ssc:100144519%09blue/ssc:396816%09blue
FoxO signaling pathway	KEGG PATHWAY	ssc04068	10	87	0.434452	0.999929	ssc:396851,PIK3R5,396851:down|ssc:100738857,-,100738857:down|ssc:397251,PLK2,397251:down|ssc:100511070,HOMER1,100511070:down|ssc:100271930,IL7R,100271930:down|ssc:396665,-,396665:down|ssc:397106,IL10,397106:down|ssc:100625739,SGK1,100625739:down|ssc:100525560,CDKN2D,100525560:up|ssc:100152215,-,100152215:down	http://www.genome.jp/kegg-bin/show_pathway?ssc04068/ssc:100625739%09blue/ssc:100525560%09red/ssc:100271930%09blue/ssc:397251%09blue/ssc:100152215%09blue/ssc:397106%09blue/ssc:100738857%09blue/ssc:100511070%09blue/ssc:396665%09blue/ssc:396851%09blue
Apoptosis	KEGG PATHWAY	ssc04210	7	60	0.4485	0.999929	ssc:397094,IL1A,397094:down|ssc:396826,FAS,396826:down|ssc:100153254,CSF2RB,100153254:down|ssc:396851,PIK3R5,396851:down|ssc:100513283,APAF1,100513283:down|ssc:100628318,IL1RAP,100628318:down|ssc:397122,IL1B1,397122:down	http://www.genome.jp/kegg-bin/show_pathway?ssc04210/ssc:100513283%09blue/ssc:397094%09blue/ssc:397122%09blue/ssc:100153254%09blue/ssc:396851%09blue/ssc:396826%09blue/ssc:100628318%09blue
MAPK signaling pathway	KEGG PATHWAY	ssc04010	17	154	0.44915	0.999929	ssc:396665,-,396665:down|ssc:397094,IL1A,397094:down|ssc:100516374,MAP4K1,100516374:down|ssc:396826,FAS,396826:down|ssc:100521986,MAPKAPK2,100521986:down|ssc:100523972,RPS6KA1,100523972:down|ssc:100738857,-,100738857:down|ssc:100621675,-,100621675:down|ssc:100157144,DUSP5,100157144:down|ssc:397495,BDNF,397495:down|ssc:100627149,-,100627149:down|ssc:397497,FGF1,397497:down|ssc:100037938,CD14,10003…	http://www.genome.jp/kegg-bin/show_pathway?ssc04010/ssc:100628112%09blue/ssc:100155958%09blue/ssc:100037938%09blue/ssc:396826%09blue/ssc:397094%09blue/ssc:100521986%09blue/ssc:100157144%09blue/ssc:397495%09blue/ssc:397122%09blue/ssc:100621675%09blue/ssc:100627149%09blue/ssc:100738857%09blue/ssc:100516199%09blue/ssc:100516374%09blue/ssc:397497%09blue/ssc:396665%09blue/ssc:100523972%09blue
Small cell lung cancer	KEGG PATHWAY	ssc05222	6	51	0.454034	0.999929	ssc:397285,ITGAV,397285:down|ssc:100513283,APAF1,100513283:down|ssc:396851,PIK3R5,396851:down|ssc:100517053,ITGA3,100517053:down|ssc:397620,FN1,397620:down|ssc:100514785,LAMC1,100514785:down	http://www.genome.jp/kegg-bin/show_pathway?ssc05222/ssc:100513283%09blue/ssc:397620%09blue/ssc:100514785%09blue/ssc:100517053%09blue/ssc:397285%09blue/ssc:396851%09blue
Glycosaminoglycan biosynthesis - keratan sulfate	KEGG PATHWAY	ssc00533	2	14	0.454231	0.999929	ssc:100623864,-,100623864:down|ssc:100524195,-,100524195:down	http://www.genome.jp/kegg-bin/show_pathway?ssc00533/ssc:100623864%09blue/ssc:100524195%09blue
Salivary secretion	KEGG PATHWAY	ssc04970	5	42	0.460216	0.999929	ssc:100516581,PLCB4,100516581:down|ssc:100157211,LYZ,100157211:down|ssc:100525148,PLCB3,100525148:down|ssc:397458,SLC9A1,397458:down|ssc:100516960,SLC12A2,100516960:down	http://www.genome.jp/kegg-bin/show_pathway?ssc04970/ssc:100525148%09blue/ssc:100157211%09blue/ssc:100516581%09blue/ssc:100516960%09blue/ssc:397458%09blue
Type II diabetes mellitus	KEGG PATHWAY	ssc04930	4	33	0.467304	0.999929	ssc:494561,HK2,494561:down|ssc:100514142,GCK,100514142:up|ssc:396851,PIK3R5,396851:down|ssc:100522855,HK3,100522855:down	http://www.genome.jp/kegg-bin/show_pathway?ssc04930/ssc:100514142%09red/ssc:494561%09blue/ssc:100522855%09blue/ssc:396851%09blue
Terpenoid backbone biosynthesis	KEGG PATHWAY	ssc00900	2	15	0.486469	0.999929	ssc:100144446,HMGCR,100144446:up|ssc:100739304,-,100739304:up	http://www.genome.jp/kegg-bin/show_pathway?ssc00900/ssc:100144446%09red/ssc:100739304%09red
Other glycan degradation	KEGG PATHWAY	ssc00511	2	15	0.486469	0.999929	ssc:100739223,NEU3,100739223:down|ssc:100124381,NEU1,100124381:down	http://www.genome.jp/kegg-bin/show_pathway?ssc00511/ssc:100124381%09blue/ssc:100739223%09blue
Hippo signaling pathway	KEGG PATHWAY	ssc04390	10	94	0.524766	0.999929	ssc:100113425,BMP4,100113425:down|ssc:100738857,-,100738857:down|ssc:100152141,CTGF,100152141:down|ssc:396665,-,396665:down|ssc:397497,FGF1,397497:down|ssc:654298,ID2,654298:down|ssc:100522839,ID1,100522839:up|ssc:100127483,BMPR2,100127483:down|ssc:100151957,PARD6B,100151957:down|ssc:396943,ITGB2,396943:down	http://www.genome.jp/kegg-bin/show_pathway?ssc04390/ssc:100127483%09blue/ssc:100522839%09red/ssc:100152141%09blue/ssc:100113425%09blue/ssc:100738857%09blue/ssc:654298%09blue/ssc:397497%09blue/ssc:100151957%09blue/ssc:396665%09blue/ssc:396943%09blue
Renal cell carcinoma	KEGG PATHWAY	ssc05211	4	36	0.529846	0.999929	ssc:100152368,EGLN3,100152368:down|ssc:100627149,-,100627149:down|ssc:396851,PIK3R5,396851:down|ssc:396696,HIF1A,396696:down	http://www.genome.jp/kegg-bin/show_pathway?ssc05211/ssc:100152368%09blue/ssc:396696%09blue/ssc:100627149%09blue/ssc:396851%09blue
Acute myeloid leukemia	KEGG PATHWAY	ssc05221	4	36	0.529846	0.999929	ssc:100512633,RUNX1,100512633:down|ssc:100157844,PIM1,100157844:down|ssc:396851,PIK3R5,396851:down|ssc:414912,SPI1,414912:down	http://www.genome.jp/kegg-bin/show_pathway?ssc05221/ssc:414912%09blue/ssc:100512633%09blue/ssc:100157844%09blue/ssc:396851%09blue
Carbon metabolism	KEGG PATHWAY	ssc01200	8	75	0.530209	0.999929	ssc:100514142,GCK,100514142:up|ssc:100522855,HK3,100522855:down|ssc:100127150,TKT,100127150:down|ssc:100038014,RPIA,100038014:down|ssc:100154828,ACSS1,100154828:down|ssc:100157750,ENO2,100157750:up|ssc:494561,HK2,494561:down|ssc:397038,FBP1,397038:down	http://www.genome.jp/kegg-bin/show_pathway?ssc01200/ssc:100514142%09red/ssc:100038014%09blue/ssc:100127150%09blue/ssc:100522855%09blue/ssc:100157750%09red/ssc:397038%09blue/ssc:100154828%09blue/ssc:494561%09blue
p53 signaling pathway	KEGG PATHWAY	ssc04115	5	46	0.53409	0.999929	ssc:100152215,-,100152215:down|ssc:396826,FAS,396826:down|ssc:100523876,SESN1,100523876:up|ssc:100620912,STEAP3,100620912:down|ssc:100513283,APAF1,100513283:down	http://www.genome.jp/kegg-bin/show_pathway?ssc04115/ssc:100523876%09red/ssc:100513283%09blue/ssc:100620912%09blue/ssc:396826%09blue/ssc:100152215%09blue
Jak-STAT signaling pathway	KEGG PATHWAY	ssc04630	12	115	0.543433	0.999929	ssc:100515191,TSLP,100515191:down|ssc:100157844,PIM1,100157844:down|ssc:396851,PIK3R5,396851:down|ssc:100153254,CSF2RB,100153254:down|ssc:397201,JAK2,397201:down|ssc:397614,IL4R,397614:down|ssc:399503,LIF,399503:down|ssc:100621690,CBLB,100621690:down|ssc:100525654,IL10RA,100525654:down|ssc:397106,IL10,397106:down|ssc:100152038,OSM,100152038:down|ssc:100271930,IL7R,100271930:down	http://www.genome.jp/kegg-bin/show_pathway?ssc04630/ssc:397201%09blue/ssc:100515191%09blue/ssc:399503%09blue/ssc:100271930%09blue/ssc:100152038%09blue/ssc:100157844%09blue/ssc:397106%09blue/ssc:100621690%09blue/ssc:100153254%09blue/ssc:396851%09blue/ssc:100525654%09blue/ssc:397614%09blue
Thyroid hormone signaling pathway	KEGG PATHWAY	ssc04919	8	76	0.544212	0.999929	ssc:100516581,PLCB4,100516581:down|ssc:397285,ITGAV,397285:down|ssc:100628203,-,100628203:down|ssc:396851,PIK3R5,396851:down|ssc:397458,SLC9A1,397458:down|ssc:397063,ITGB3,397063:down|ssc:100525148,PLCB3,100525148:down|ssc:396696,HIF1A,396696:down	http://www.genome.jp/kegg-bin/show_pathway?ssc04919/ssc:100525148%09blue/ssc:397063%09blue/ssc:100516581%09blue/ssc:397458%09blue/ssc:396696%09blue/ssc:100628203%09blue/ssc:397285%09blue/ssc:396851%09blue
Histidine metabolism	KEGG PATHWAY	ssc00340	2	17	0.547233	0.999929	ssc:100624677,HNMT,100624677:down|ssc:100156724,HDC,100156724:down	http://www.genome.jp/kegg-bin/show_pathway?ssc00340/ssc:100156724%09blue/ssc:100624677%09blue
Vitamin digestion and absorption	KEGG PATHWAY	ssc04977	2	17	0.547233	0.999929	ssc:397681,APOA4,397681:down|ssc:100516303,SLC52A3,100516303:up	http://www.genome.jp/kegg-bin/show_pathway?ssc04977/ssc:100516303%09red/ssc:397681%09blue
Selenocompound metabolism	KEGG PATHWAY	ssc00450	1	7	0.547779	0.999929	ssc:396681,TXNRD1,396681:down	http://www.genome.jp/kegg-bin/show_pathway?ssc00450/ssc:396681%09blue
Gastric acid secretion	KEGG PATHWAY	ssc04971	5	47	0.551843	0.999929	ssc:100516581,PLCB4,100516581:down|ssc:397458,SLC9A1,397458:down|ssc:100625720,HRH2,100625720:down|ssc:100525148,PLCB3,100525148:down|ssc:100152071,KCNJ15,100152071:down	http://www.genome.jp/kegg-bin/show_pathway?ssc04971/ssc:100525148%09blue/ssc:100625720%09blue/ssc:100516581%09blue/ssc:397458%09blue/ssc:100152071%09blue
cAMP signaling pathway	KEGG PATHWAY	ssc04024	13	127	0.567788	0.999929	ssc:100037941,PDE4B,100037941:down|ssc:100621675,-,100621675:down|ssc:100037967,PDE4D,100037967:down|ssc:100127164,PTGER2,100127164:down|ssc:397458,SLC9A1,397458:down|ssc:397495,BDNF,397495:down|ssc:100627149,-,100627149:down|ssc:100126285,FFAR2,100126285:down|ssc:396851,PIK3R5,396851:down|ssc:100516663,CREB3L1,100516663:down|ssc:397547,NPY1R,397547:up|ssc:100519821,VAV1,100519821:down|ssc:100519…	http://www.genome.jp/kegg-bin/show_pathway?ssc04024/ssc:100519446%09blue/ssc:100037967%09blue/ssc:100519821%09blue/ssc:100621675%09blue/ssc:397458%09blue/ssc:397547%09red/ssc:100627149%09blue/ssc:100037941%09blue/ssc:397495%09blue/ssc:100516663%09blue/ssc:100126285%09blue/ssc:100127164%09blue/ssc:396851%09blue
Sphingolipid metabolism	KEGG PATHWAY	ssc00600	4	38	0.569458	0.999929	ssc:100518796,SGMS2,100518796:down|ssc:100739223,NEU3,100739223:down|ssc:100124381,NEU1,100124381:down|ssc:100415928,GLA,100415928:down	http://www.genome.jp/kegg-bin/show_pathway?ssc00600/ssc:100124381%09blue/ssc:100739223%09blue/ssc:100415928%09blue/ssc:100518796%09blue
Carbohydrate digestion and absorption	KEGG PATHWAY	ssc04973	3	28	0.570999	0.999929	ssc:494561,HK2,494561:down|ssc:396851,PIK3R5,396851:down|ssc:100522855,HK3,100522855:down	http://www.genome.jp/kegg-bin/show_pathway?ssc04973/ssc:494561%09blue/ssc:100522855%09blue/ssc:396851%09blue
Non-alcoholic fatty liver disease (NAFLD)	KEGG PATHWAY	ssc04932	12	118	0.577006	0.999929	ssc:397094,IL1A,397094:down|ssc:396826,FAS,396826:down|ssc:100739619,NDUFB1,100739619:up|ssc:396851,PIK3R5,396851:down|ssc:397122,IL1B1,397122:down|ssc:100627149,-,100627149:down|ssc:733605,NDUFB6,733605:up|ssc:396880,-,396880:down|ssc:100154443,NDUFA8,100154443:up|ssc:100522775,NDUFB11,100522775:up|ssc:100523751,NDUFB5,100523751:up|ssc:100620730,-,100620730:down	http://www.genome.jp/kegg-bin/show_pathway?ssc04932/ssc:100620730%09blue/ssc:100154443%09red/ssc:100522775%09red/ssc:397094%09blue/ssc:100523751%09red/ssc:397122%09blue/ssc:100627149%09blue/ssc:733605%09red/ssc:396880%09blue/ssc:396826%09blue/ssc:100739619%09red/ssc:396851%09blue
GnRH signaling pathway	KEGG PATHWAY	ssc04912	5	49	0.58632	0.999929	ssc:397564,HBEGF,397564:down|ssc:100157507,PTK2B,100157507:down|ssc:100525148,PLCB3,100525148:down|ssc:100516581,PLCB4,100516581:down|ssc:100519446,PLD1,100519446:down	http://www.genome.jp/kegg-bin/show_pathway?ssc04912/ssc:100525148%09blue/ssc:100519446%09blue/ssc:397564%09blue/ssc:100157507%09blue/ssc:100516581%09blue
Chemical carcinogenesis	KEGG PATHWAY	ssc05204	4	39	0.588551	0.999929	ssc:100153094,-,100153094:up|ssc:100154313,-,100154313:up|ssc:100521480,GSTK1,100521480:up|ssc:397682,-,397682:up	http://www.genome.jp/kegg-bin/show_pathway?ssc05204/ssc:100153094%09red/ssc:100154313%09red/ssc:397682%09red/ssc:100521480%09red
Herpes simplex infection	KEGG PATHWAY	ssc05168	13	129	0.588949	0.999929	ssc:100135040,SLA-DRA,100135040:down|ssc:396826,FAS,396826:down|ssc:100623776,TICAM1,100623776:down|ssc:100037921,SLA-DQB1,100037921:down|ssc:397201,JAK2,397201:down|ssc:397007,TLR9,397007:down|ssc:100153386,SLA-DRB1,100153386:down|ssc:100153387,SLA-DQA,100153387:down|ssc:445528,HLA-DMA,445528:down|ssc:100737040,POLR2A,100737040:down|ssc:100135050,SLA-DMB,100135050:down|ssc:397122,IL1B1,397122:do…	http://www.genome.jp/kegg-bin/show_pathway?ssc05168/ssc:100737040%09blue/ssc:397201%09blue/ssc:100623776%09blue/ssc:445528%09blue/ssc:100153387%09blue/ssc:100153386%09blue/ssc:100037921%09blue/ssc:397122%09blue/ssc:397007%09blue/ssc:396623%09blue/ssc:100135040%09blue/ssc:396826%09blue/ssc:100135050%09blue
Inflammatory mediator regulation of TRP channels	KEGG PATHWAY	ssc04750	7	70	0.599159	0.999929	ssc:100516581,PLCB4,100516581:down|ssc:396851,PIK3R5,396851:down|ssc:100127164,PTGER2,100127164:down|ssc:100628318,IL1RAP,100628318:down|ssc:100525148,PLCB3,100525148:down|ssc:100519703,F2RL1,100519703:down|ssc:397122,IL1B1,397122:down	http://www.genome.jp/kegg-bin/show_pathway?ssc04750/ssc:100525148%09blue/ssc:100127164%09blue/ssc:100519703%09blue/ssc:100516581%09blue/ssc:397122%09blue/ssc:100628318%09blue/ssc:396851%09blue
Estrogen signaling pathway	KEGG PATHWAY	ssc04915	6	60	0.600571	0.999929	ssc:397564,HBEGF,397564:down|ssc:100516581,PLCB4,100516581:down|ssc:654325,MMP9,654325:down|ssc:396851,PIK3R5,396851:down|ssc:100525148,PLCB3,100525148:down|ssc:100516663,CREB3L1,100516663:down	http://www.genome.jp/kegg-bin/show_pathway?ssc04915/ssc:100525148%09blue/ssc:100516663%09blue/ssc:100516581%09blue/ssc:654325%09blue/ssc:397564%09blue/ssc:396851%09blue
Glycosaminoglycan biosynthesis - heparan sulfate / heparin	KEGG PATHWAY	ssc00534	2	19	0.602769	0.999929	ssc:100623848,EXTL1,100623848:up|ssc:100154444,GLCE,100154444:down	http://www.genome.jp/kegg-bin/show_pathway?ssc00534/ssc:100154444%09blue/ssc:100623848%09red
Signaling pathways regulating pluripotency of stem cells	KEGG PATHWAY	ssc04550	9	91	0.610428	0.999929	ssc:100113425,BMP4,100113425:down|ssc:396851,PIK3R5,396851:down|ssc:397093,INHBA,397093:down|ssc:397201,JAK2,397201:down|ssc:399503,LIF,399503:down|ssc:654298,ID2,654298:down|ssc:100522839,ID1,100522839:up|ssc:100127483,BMPR2,100127483:down|ssc:100152462,ACVR1B,100152462:down	http://www.genome.jp/kegg-bin/show_pathway?ssc04550/ssc:100127483%09blue/ssc:397201%09blue/ssc:399503%09blue/ssc:100522839%09red/ssc:397093%09blue/ssc:100113425%09blue/ssc:100152462%09blue/ssc:654298%09blue/ssc:396851%09blue
HTLV-I infection	KEGG PATHWAY	ssc05166	17	171	0.611402	0.999929	ssc:100134969,NFATC2,100134969:down|ssc:100135040,SLA-DRA,100135040:down|ssc:396851,PIK3R5,396851:down|ssc:100738857,-,100738857:down|ssc:414912,SPI1,414912:down|ssc:100628112,IL1R2,100628112:down|ssc:100153386,SLA-DRB1,100153386:down|ssc:100153387,SLA-DQA,100153387:down|ssc:396665,-,396665:down|ssc:100152215,-,100152215:down|ssc:100155958,SRF,100155958:down|ssc:445528,HLA-DMA,445528:down|ssc:100…	http://www.genome.jp/kegg-bin/show_pathway?ssc05166/ssc:445528%09blue/ssc:100153387%09blue/ssc:100153386%09blue/ssc:396851%09blue/ssc:414912%09blue/ssc:100152215%09blue/ssc:100134969%09blue/ssc:100037921%09blue/ssc:100155958%09blue/ssc:100628112%09blue/ssc:100738857%09blue/ssc:100135040%09blue/ssc:100038004%09blue/ssc:100135050%09blue/ssc:396665%09blue/ssc:100738612%09blue/ssc:396943%09blue
Huntington's disease	KEGG PATHWAY	ssc05016	14	142	0.619749	0.999929	ssc:100516581,PLCB4,100516581:down|ssc:100739619,NDUFB1,100739619:up|ssc:100513283,APAF1,100513283:down|ssc:397495,BDNF,397495:down|ssc:733605,NDUFB6,733605:up|ssc:100525148,PLCB3,100525148:down|ssc:100736934,HAP1,100736934:down|ssc:100154443,NDUFA8,100154443:up|ssc:100516663,CREB3L1,100516663:down|ssc:100522775,NDUFB11,100522775:up|ssc:100519335,IFT57,100519335:up|ssc:100737040,POLR2A,100737040:…	http://www.genome.jp/kegg-bin/show_pathway?ssc05016/ssc:100525148%09blue/ssc:100737040%09blue/ssc:100516663%09blue/ssc:100154443%09red/ssc:100513283%09blue/ssc:100152612%09blue/ssc:100522775%09red/ssc:100739619%09red/ssc:100523751%09red/ssc:100736934%09blue/ssc:733605%09red/ssc:397495%09blue/ssc:100519335%09red/ssc:100516581%09blue
mTOR signaling pathway	KEGG PATHWAY	ssc04150	4	41	0.6252	0.999929	ssc:100522720,-,100522720:up|ssc:396851,PIK3R5,396851:down|ssc:100523972,RPS6KA1,100523972:down|ssc:396696,HIF1A,396696:down	http://www.genome.jp/kegg-bin/show_pathway?ssc04150/ssc:100522720%09red/ssc:100523972%09blue/ssc:396696%09blue/ssc:396851%09blue
Neurotrophin signaling pathway	KEGG PATHWAY	ssc04722	7	72	0.626698	0.999929	ssc:100521543,MATK,100521543:down|ssc:100521986,MAPKAPK2,100521986:down|ssc:100523972,RPS6KA1,100523972:down|ssc:396851,PIK3R5,396851:down|ssc:397495,BDNF,397495:down|ssc:100627149,-,100627149:down|ssc:100153486,NFKBIE,100153486:down	http://www.genome.jp/kegg-bin/show_pathway?ssc04722/ssc:100521543%09blue/ssc:100153486%09blue/ssc:100521986%09blue/ssc:100627149%09blue/ssc:397495%09blue/ssc:100523972%09blue/ssc:396851%09blue
Riboflavin metabolism	KEGG PATHWAY	ssc00740	1	9	0.62918	0.999929	ssc:100037271,ENPP1,100037271:down	http://www.genome.jp/kegg-bin/show_pathway?ssc00740/ssc:100037271%09blue
Insulin signaling pathway	KEGG PATHWAY	ssc04910	9	94	0.646195	0.999929	ssc:100514142,GCK,100514142:up|ssc:396851,PIK3R5,396851:down|ssc:100522855,HK3,100522855:down|ssc:100515931,PPP1R3B,100515931:down|ssc:100621690,CBLB,100621690:down|ssc:396667,PTPN1,396667:down|ssc:494561,HK2,494561:down|ssc:100519810,PHKA2,100519810:down|ssc:397038,FBP1,397038:down	http://www.genome.jp/kegg-bin/show_pathway?ssc04910/ssc:100514142%09red/ssc:397038%09blue/ssc:100621690%09blue/ssc:100522855%09blue/ssc:100519810%09blue/ssc:100515931%09blue/ssc:494561%09blue/ssc:396667%09blue/ssc:396851%09blue
Complement and coagulation cascades	KEGG PATHWAY	ssc04610	5	53	0.650668	0.999929	ssc:396985,PLAU,396985:down|ssc:100516921,CFI,100516921:up|ssc:100153504,F13A1,100153504:down|ssc:100521017,PLAUR,100521017:down|ssc:445464,C1R,445464:up	http://www.genome.jp/kegg-bin/show_pathway?ssc04610/ssc:100153504%09blue/ssc:100516921%09red/ssc:100521017%09blue/ssc:445464%09red/ssc:396985%09blue
Long-term depression	KEGG PATHWAY	ssc04730	3	32	0.654733	0.999929	ssc:100516581,PLCB4,100516581:down|ssc:100525148,PLCB3,100525148:down|ssc:100522824,GNA13,100522824:down	http://www.genome.jp/kegg-bin/show_pathway?ssc04730/ssc:100525148%09blue/ssc:100522824%09blue/ssc:100516581%09blue
Alzheimer's disease	KEGG PATHWAY	ssc05010	12	126	0.660885	0.999929	ssc:100516581,PLCB4,100516581:down|ssc:100514839,-,100514839:down|ssc:396826,FAS,396826:down|ssc:100739619,NDUFB1,100739619:up|ssc:100513283,APAF1,100513283:down|ssc:100511536,MME,100511536:down|ssc:733605,NDUFB6,733605:up|ssc:100525148,PLCB3,100525148:down|ssc:100154443,NDUFA8,100154443:up|ssc:100522775,NDUFB11,100522775:up|ssc:100523751,NDUFB5,100523751:up|ssc:397122,IL1B1,397122:down	http://www.genome.jp/kegg-bin/show_pathway?ssc05010/ssc:100525148%09blue/ssc:100513283%09blue/ssc:100511536%09blue/ssc:100154443%09red/ssc:100516581%09blue/ssc:100522775%09red/ssc:100739619%09red/ssc:396826%09blue/ssc:100523751%09red/ssc:397122%09blue/ssc:733605%09red/ssc:100514839%09blue
Biosynthesis of unsaturated fatty acids	KEGG PATHWAY	ssc01040	1	10	0.664211	0.999929	ssc:100158115,ACOT4,100158115:up	http://www.genome.jp/kegg-bin/show_pathway?ssc01040/ssc:100158115%09red
Taurine and hypotaurine metabolism	KEGG PATHWAY	ssc00430	1	10	0.664211	0.999929	ssc:100312964,CDO1,100312964:up	http://www.genome.jp/kegg-bin/show_pathway?ssc00430/ssc:100312964%09red
Primary bile acid biosynthesis	KEGG PATHWAY	ssc00120	1	10	0.664211	0.999929	ssc:100157868,CH25H,100157868:down	http://www.genome.jp/kegg-bin/show_pathway?ssc00120/ssc:100157868%09blue
Tight junction	KEGG PATHWAY	ssc04530	9	96	0.668984	0.999929	ssc:100127138,F11R,100127138:down|ssc:100151957,PARD6B,100151957:down|ssc:100521992,HCLS1,100521992:down|ssc:100518125,YBX3,100518125:up|ssc:100153752,CLDN10,100153752:up|ssc:100520913,EPB41L3,100520913:down|ssc:100514585,RAB3B,100514585:down|ssc:100626455,TJP3,100626455:up|ssc:100625166,CLDN1,100625166:down	http://www.genome.jp/kegg-bin/show_pathway?ssc04530/ssc:100153752%09red/ssc:100520913%09blue/ssc:100518125%09red/ssc:100521992%09blue/ssc:100514585%09blue/ssc:100626455%09red/ssc:100127138%09blue/ssc:100625166%09blue/ssc:100151957%09blue
Mineral absorption	KEGG PATHWAY	ssc04978	3	33	0.673729	0.999929	ssc:396628,VDR,396628:down|ssc:397186,-,397186:down|ssc:497236,-,497236:up	http://www.genome.jp/kegg-bin/show_pathway?ssc04978/ssc:397186%09blue/ssc:497236%09red/ssc:396628%09blue
cGMP-PKG signaling pathway	KEGG PATHWAY	ssc04022	10	107	0.676274	0.999929	ssc:100516581,PLCB4,100516581:down|ssc:100134969,NFATC2,100134969:down|ssc:414911,EDNRB,414911:down|ssc:396851,PIK3R5,396851:down|ssc:100155958,SRF,100155958:down|ssc:100525148,PLCB3,100525148:down|ssc:100516663,CREB3L1,100516663:down|ssc:100522824,GNA13,100522824:down|ssc:733670,RGS2,733670:up|ssc:100152612,-,100152612:down	http://www.genome.jp/kegg-bin/show_pathway?ssc04022/ssc:100525148%09blue/ssc:100155958%09blue/ssc:100522824%09blue/ssc:733670%09red/ssc:100152612%09blue/ssc:414911%09blue/ssc:100516581%09blue/ssc:100134969%09blue/ssc:100516663%09blue/ssc:396851%09blue
Wnt signaling pathway	KEGG PATHWAY	ssc04310	8	87	0.684735	0.999929	ssc:100516581,PLCB4,100516581:down|ssc:100134969,NFATC2,100134969:down|ssc:100621675,-,100621675:down|ssc:100153176,SFRP5,100153176:down|ssc:449001,BAMBI,449001:up|ssc:100627149,-,100627149:down|ssc:100525148,PLCB3,100525148:down|ssc:100516027,SFRP2,100516027:down	http://www.genome.jp/kegg-bin/show_pathway?ssc04310/ssc:100525148%09blue/ssc:100516027%09blue/ssc:100516581%09blue/ssc:100153176%09blue/ssc:100134969%09blue/ssc:100621675%09blue/ssc:449001%09red/ssc:100627149%09blue
Viral carcinogenesis	KEGG PATHWAY	ssc05203	12	129	0.689825	0.999929	ssc:100516296,EGR3,100516296:down|ssc:100525104,REL,100525104:down|ssc:396851,PIK3R5,396851:down|ssc:100516663,CREB3L1,100516663:down|ssc:414371,CCR5,414371:down|ssc:100627149,-,100627149:down|ssc:100155958,SRF,100155958:down|ssc:100621915,HIST1H2BN,100621915:down|ssc:100038004,EGR2,100038004:down|ssc:100152215,-,100152215:down|ssc:100156932,-,100156932:down|ssc:100521986,MAPKAPK2,100521986:down	http://www.genome.jp/kegg-bin/show_pathway?ssc05203/ssc:100516663%09blue/ssc:100155958%09blue/ssc:100152215%09blue/ssc:414371%09blue/ssc:100521986%09blue/ssc:100525104%09blue/ssc:100621915%09blue/ssc:100156932%09blue/ssc:100627149%09blue/ssc:100038004%09blue/ssc:100516296%09blue/ssc:396851%09blue
Prolactin signaling pathway	KEGG PATHWAY	ssc04917	4	45	0.691988	0.999929	ssc:397201,JAK2,397201:down|ssc:100514142,GCK,100514142:up|ssc:403330,CYP17A1,403330:down|ssc:396851,PIK3R5,396851:down	http://www.genome.jp/kegg-bin/show_pathway?ssc04917/ssc:397201%09blue/ssc:100514142%09red/ssc:403330%09blue/ssc:396851%09blue
Insulin secretion	KEGG PATHWAY	ssc04911	5	56	0.69453	0.999929	ssc:100516581,PLCB4,100516581:down|ssc:100514142,GCK,100514142:up|ssc:100512594,STX1A,100512594:down|ssc:100525148,PLCB3,100525148:down|ssc:100516663,CREB3L1,100516663:down	http://www.genome.jp/kegg-bin/show_pathway?ssc04911/ssc:100525148%09blue/ssc:100514142%09red/ssc:100516663%09blue/ssc:100512594%09blue/ssc:100516581%09blue
Non-homologous end-joining	KEGG PATHWAY	ssc03450	1	11	0.695935	0.999929	ssc:100153546,NHEJ1,100153546:up	http://www.genome.jp/kegg-bin/show_pathway?ssc03450/ssc:100153546%09red
Thyroid hormone synthesis	KEGG PATHWAY	ssc04918	4	46	0.707289	0.999929	ssc:100516581,PLCB4,100516581:down|ssc:407060,HSPA5,407060:down|ssc:100525148,PLCB3,100525148:down|ssc:100516663,CREB3L1,100516663:down	http://www.genome.jp/kegg-bin/show_pathway?ssc04918/ssc:100525148%09blue/ssc:407060%09blue/ssc:100516663%09blue/ssc:100516581%09blue
Mucin type O-Glycan biosynthesis	KEGG PATHWAY	ssc00512	2	24	0.718642	0.999929	ssc:100518180,GCNT4,100518180:down|ssc:100157004,GCNT1,100157004:down	http://www.genome.jp/kegg-bin/show_pathway?ssc00512/ssc:100157004%09blue/ssc:100518180%09blue
Arginine and proline metabolism	KEGG PATHWAY	ssc00330	4	47	0.722029	0.999929	ssc:397264,CKM,397264:down|ssc:414408,ODC1,414408:down|ssc:397115,-,397115:down|ssc:100126844,GATM,100126844:up	http://www.genome.jp/kegg-bin/show_pathway?ssc00330/ssc:100126844%09red/ssc:397115%09blue/ssc:414408%09blue/ssc:397264%09blue
Glutamatergic synapse	KEGG PATHWAY	ssc04724	6	69	0.722989	0.999929	ssc:100516581,PLCB4,100516581:down|ssc:100624513,GRIK1,100624513:up|ssc:100525148,PLCB3,100525148:down|ssc:397003,SLC1A1,397003:down|ssc:100511070,HOMER1,100511070:down|ssc:100519446,PLD1,100519446:down	http://www.genome.jp/kegg-bin/show_pathway?ssc04724/ssc:100525148%09blue/ssc:100519446%09blue/ssc:100516581%09blue/ssc:397003%09blue/ssc:100624513%09red/ssc:100511070%09blue
Dorso-ventral axis formation	KEGG PATHWAY	ssc04320	1	12	0.724664	0.999929	ssc:100156210,ETV7,100156210:down	http://www.genome.jp/kegg-bin/show_pathway?ssc04320/ssc:100156210%09blue
alpha-Linolenic acid metabolism	KEGG PATHWAY	ssc00592	1	12	0.724664	0.999929	ssc:100511161,PLA2G3,100511161:down	http://www.genome.jp/kegg-bin/show_pathway?ssc00592/ssc:100511161%09blue
Steroid hormone biosynthesis	KEGG PATHWAY	ssc00140	3	36	0.726045	0.999929	ssc:448816,STS,448816:down|ssc:100147712,HSD17B1,100147712:down|ssc:403330,CYP17A1,403330:down	http://www.genome.jp/kegg-bin/show_pathway?ssc00140/ssc:100147712%09blue/ssc:403330%09blue/ssc:448816%09blue
Cholinergic synapse	KEGG PATHWAY	ssc04725	5	59	0.734455	0.999929	ssc:397201,JAK2,397201:down|ssc:100516581,PLCB4,100516581:down|ssc:100525148,PLCB3,100525148:down|ssc:396851,PIK3R5,396851:down|ssc:100516663,CREB3L1,100516663:down	http://www.genome.jp/kegg-bin/show_pathway?ssc04725/ssc:100525148%09blue/ssc:397201%09blue/ssc:100516581%09blue/ssc:100516663%09blue/ssc:396851%09blue
Long-term potentiation	KEGG PATHWAY	ssc04720	3	37	0.741954	0.999929	ssc:100516581,PLCB4,100516581:down|ssc:100525148,PLCB3,100525148:down|ssc:100523972,RPS6KA1,100523972:down	http://www.genome.jp/kegg-bin/show_pathway?ssc04720/ssc:100525148%09blue/ssc:100523972%09blue/ssc:100516581%09blue
Fatty acid elongation	KEGG PATHWAY	ssc00062	1	13	0.750679	0.999929	ssc:100158115,ACOT4,100158115:up	http://www.genome.jp/kegg-bin/show_pathway?ssc00062/ssc:100158115%09red
Aldosterone-regulated sodium reabsorption	KEGG PATHWAY	ssc04960	2	26	0.756346	0.999929	ssc:100625739,SGK1,100625739:down|ssc:396851,PIK3R5,396851:down	http://www.genome.jp/kegg-bin/show_pathway?ssc04960/ssc:100625739%09blue/ssc:396851%09blue
Melanogenesis	KEGG PATHWAY	ssc04916	5	61	0.758877	0.999929	ssc:100516581,PLCB4,100516581:down|ssc:396915,EDN1,396915:down|ssc:100525148,PLCB3,100525148:down|ssc:414911,EDNRB,414911:down|ssc:100516663,CREB3L1,100516663:down	http://www.genome.jp/kegg-bin/show_pathway?ssc04916/ssc:100525148%09blue/ssc:414911%09blue/ssc:396915%09blue/ssc:100516663%09blue/ssc:100516581%09blue
Ovarian steroidogenesis	KEGG PATHWAY	ssc04913	2	27	0.773506	0.999929	ssc:100147712,HSD17B1,100147712:down|ssc:403330,CYP17A1,403330:down	http://www.genome.jp/kegg-bin/show_pathway?ssc04913/ssc:100147712%09blue/ssc:403330%09blue
Renin-angiotensin system	KEGG PATHWAY	ssc04614	1	14	0.774238	0.999929	ssc:100511536,MME,100511536:down	http://www.genome.jp/kegg-bin/show_pathway?ssc04614/ssc:100511536%09blue
PPAR signaling pathway	KEGG PATHWAY	ssc03320	4	51	0.775464	0.999929	ssc:100233182,GK,100233182:down|ssc:396724,OLR1,396724:down|ssc:397320,MMP1,397320:down|ssc:399532,FABP3,399532:up	http://www.genome.jp/kegg-bin/show_pathway?ssc03320/ssc:100233182%09blue/ssc:399532%09red/ssc:397320%09blue/ssc:396724%09blue
Melanoma	KEGG PATHWAY	ssc05218	3	40	0.785277	0.999929	ssc:100152215,-,100152215:down|ssc:396851,PIK3R5,396851:down|ssc:397497,FGF1,397497:down	http://www.genome.jp/kegg-bin/show_pathway?ssc05218/ssc:397497%09blue/ssc:100152215%09blue/ssc:396851%09blue
Hepatitis C	KEGG PATHWAY	ssc05160	7	86	0.786653	0.999929	ssc:100623776,TICAM1,100623776:down|ssc:396851,PIK3R5,396851:down|ssc:100153752,CLDN10,100153752:up|ssc:396880,-,396880:down|ssc:100620730,-,100620730:down|ssc:100152215,-,100152215:down|ssc:100625166,CLDN1,100625166:down	http://www.genome.jp/kegg-bin/show_pathway?ssc05160/ssc:100623776%09blue/ssc:100620730%09blue/ssc:100153752%09red/ssc:100152215%09blue/ssc:396880%09blue/ssc:100625166%09blue/ssc:396851%09blue
Biosynthesis of amino acids	KEGG PATHWAY	ssc01230	4	52	0.787477	0.999929	ssc:100038014,RPIA,100038014:down|ssc:397115,-,397115:down|ssc:100127150,TKT,100127150:down|ssc:100157750,ENO2,100157750:up	http://www.genome.jp/kegg-bin/show_pathway?ssc01230/ssc:100157750%09red/ssc:100127150%09blue/ssc:100038014%09blue/ssc:397115%09blue
Phosphatidylinositol signaling system	KEGG PATHWAY	ssc04070	4	52	0.787477	0.999929	ssc:100516581,PLCB4,100516581:down|ssc:733582,CDS1,733582:down|ssc:100525148,PLCB3,100525148:down|ssc:396851,PIK3R5,396851:down	http://www.genome.jp/kegg-bin/show_pathway?ssc04070/ssc:100525148%09blue/ssc:100516581%09blue/ssc:733582%09blue/ssc:396851%09blue
RNA polymerase	KEGG PATHWAY	ssc03020	2	28	0.789599	0.999929	ssc:100737040,POLR2A,100737040:down|ssc:100521261,POLR3K,100521261:up	http://www.genome.jp/kegg-bin/show_pathway?ssc03020/ssc:100737040%09blue/ssc:100521261%09red
Glycosaminoglycan biosynthesis - chondroitin sulfate / dermatan sulfate	KEGG PATHWAY	ssc00532	1	15	0.795572	0.999929	ssc:100520288,CHSY1,100520288:down	http://www.genome.jp/kegg-bin/show_pathway?ssc00532/ssc:100520288%09blue
Porphyrin and chlorophyll metabolism	KEGG PATHWAY	ssc00860	2	29	0.804675	0.999929	ssc:100144519,GUSB,100144519:down|ssc:100157459,MMAB,100157459:up	http://www.genome.jp/kegg-bin/show_pathway?ssc00860/ssc:100157459%09red/ssc:100144519%09blue
Ras signaling pathway	KEGG PATHWAY	ssc04014	12	144	0.81088	0.999929	ssc:100519446,PLD1,100519446:down|ssc:100621675,-,100621675:down|ssc:396851,PIK3R5,396851:down|ssc:100511161,PLA2G3,100511161:down|ssc:100525104,REL,100525104:down|ssc:100627149,-,100627149:down|ssc:397311,KDR,397311:down|ssc:397497,FGF1,397497:down|ssc:100522873,EPHA2,100522873:down|ssc:100517086,CSF1R,100517086:down|ssc:100627019,ABL2,100627019:down|ssc:100516199,RASGRP4,100516199:down	http://www.genome.jp/kegg-bin/show_pathway?ssc04014/ssc:100511161%09blue/ssc:100519446%09blue/ssc:100627019%09blue/ssc:100517086%09blue/ssc:100522873%09blue/ssc:100525104%09blue/ssc:100621675%09blue/ssc:100627149%09blue/ssc:100516199%09blue/ssc:397497%09blue/ssc:397311%09blue/ssc:396851%09blue
Maturity onset diabetes of the young	KEGG PATHWAY	ssc04950	1	16	0.814891	0.999929	ssc:100514142,GCK,100514142:up	http://www.genome.jp/kegg-bin/show_pathway?ssc04950/ssc:100514142%09red
Cocaine addiction	KEGG PATHWAY	ssc05030	2	30	0.818782	0.999929	ssc:397495,BDNF,397495:down|ssc:100516663,CREB3L1,100516663:down	http://www.genome.jp/kegg-bin/show_pathway?ssc05030/ssc:397495%09blue/ssc:100516663%09blue
Alanine, aspartate and glutamate metabolism	KEGG PATHWAY	ssc00250	2	30	0.818782	0.999929	ssc:397209,GFPT1,397209:down|ssc:100037287,DDO,100037287:up	http://www.genome.jp/kegg-bin/show_pathway?ssc00250/ssc:100037287%09red/ssc:397209%09blue
Bile secretion	KEGG PATHWAY	ssc04976	3	45	0.843978	0.999929	ssc:100153960,NR1H4,100153960:up|ssc:100144446,HMGCR,100144446:up|ssc:397458,SLC9A1,397458:down	http://www.genome.jp/kegg-bin/show_pathway?ssc04976/ssc:397458%09blue/ssc:100144446%09red/ssc:100153960%09red
Glyoxylate and dicarboxylate metabolism	KEGG PATHWAY	ssc00630	1	18	0.848227	0.999929	ssc:100739035,PGP,100739035:up	http://www.genome.jp/kegg-bin/show_pathway?ssc00630/ssc:100739035%09red
Glioma	KEGG PATHWAY	ssc05214	2	33	0.855769	0.999929	ssc:100152215,-,100152215:down|ssc:396851,PIK3R5,396851:down	http://www.genome.jp/kegg-bin/show_pathway?ssc05214/ssc:100152215%09blue/ssc:396851%09blue
Linoleic acid metabolism	KEGG PATHWAY	ssc00591	1	19	0.862572	0.999929	ssc:100511161,PLA2G3,100511161:down	http://www.genome.jp/kegg-bin/show_pathway?ssc00591/ssc:100511161%09blue
Propanoate metabolism	KEGG PATHWAY	ssc00640	1	19	0.862572	0.999929	ssc:100154828,ACSS1,100154828:down	http://www.genome.jp/kegg-bin/show_pathway?ssc00640/ssc:100154828%09blue
Protein export	KEGG PATHWAY	ssc03060	1	19	0.862572	0.999929	ssc:407060,HSPA5,407060:down	http://www.genome.jp/kegg-bin/show_pathway?ssc03060/ssc:407060%09blue
Collecting duct acid secretion	KEGG PATHWAY	ssc04966	1	19	0.862572	0.999929	ssc:100523998,-,100523998:down	http://www.genome.jp/kegg-bin/show_pathway?ssc04966/ssc:100523998%09blue
Prostate cancer	KEGG PATHWAY	ssc05215	3	47	0.863249	0.999929	ssc:100152215,-,100152215:down|ssc:396851,PIK3R5,396851:down|ssc:100516663,CREB3L1,100516663:down	http://www.genome.jp/kegg-bin/show_pathway?ssc05215/ssc:100152215%09blue/ssc:100516663%09blue/ssc:396851%09blue
Pyrimidine metabolism	KEGG PATHWAY	ssc00240	5	72	0.863703	0.999929	ssc:396681,TXNRD1,396681:down|ssc:100157138,PNP,100157138:down|ssc:100515954,CDA,100515954:down|ssc:100737040,POLR2A,100737040:down|ssc:100521261,POLR3K,100521261:up	http://www.genome.jp/kegg-bin/show_pathway?ssc00240/ssc:100737040%09blue/ssc:100521261%09red/ssc:100515954%09blue/ssc:100157138%09blue/ssc:396681%09blue
Gap junction	KEGG PATHWAY	ssc04540	3	48	0.872075	0.999929	ssc:100516581,PLCB4,100516581:down|ssc:100736584,TUBB4A,100736584:down|ssc:100525148,PLCB3,100525148:down	http://www.genome.jp/kegg-bin/show_pathway?ssc04540/ssc:100525148%09blue/ssc:100736584%09blue/ssc:100516581%09blue
Glycosylphosphatidylinositol(GPI)-anchor biosynthesis	KEGG PATHWAY	ssc00563	1	21	0.887325	0.999929	ssc:100151845,PIGH,100151845:up	http://www.genome.jp/kegg-bin/show_pathway?ssc00563/ssc:100151845%09red
Adrenergic signaling in cardiomyocytes	KEGG PATHWAY	ssc04261	6	91	0.90554	0.999929	ssc:100516581,PLCB4,100516581:down|ssc:396851,PIK3R5,396851:down|ssc:100621502,-,100621502:up|ssc:397458,SLC9A1,397458:down|ssc:100525148,PLCB3,100525148:down|ssc:100516663,CREB3L1,100516663:down	http://www.genome.jp/kegg-bin/show_pathway?ssc04261/ssc:100525148%09blue/ssc:100516663%09blue/ssc:100516581%09blue/ssc:397458%09blue/ssc:100621502%09red/ssc:396851%09blue
Cytosolic DNA-sensing pathway	KEGG PATHWAY	ssc04623	3	53	0.90904	0.999929	ssc:397319,CASP1,397319:down|ssc:397122,IL1B1,397122:down|ssc:100521261,POLR3K,100521261:up	http://www.genome.jp/kegg-bin/show_pathway?ssc04623/ssc:100521261%09red/ssc:397122%09blue/ssc:397319%09blue
Inositol phosphate metabolism	KEGG PATHWAY	ssc00562	2	39	0.909835	0.999929	ssc:100516581,PLCB4,100516581:down|ssc:100525148,PLCB3,100525148:down	http://www.genome.jp/kegg-bin/show_pathway?ssc00562/ssc:100525148%09blue/ssc:100516581%09blue
Vascular smooth muscle contraction	KEGG PATHWAY	ssc04270	4	67	0.912784	0.999929	ssc:100516581,PLCB4,100516581:down|ssc:100525148,PLCB3,100525148:down|ssc:100522824,GNA13,100522824:down|ssc:100511161,PLA2G3,100511161:down	http://www.genome.jp/kegg-bin/show_pathway?ssc04270/ssc:100525148%09blue/ssc:100511161%09blue/ssc:100522824%09blue/ssc:100516581%09blue
Calcium signaling pathway	KEGG PATHWAY	ssc04020	8	117	0.913199	0.999929	ssc:100516581,PLCB4,100516581:down|ssc:414911,EDNRB,414911:down|ssc:100625720,HRH2,100625720:down|ssc:100157507,PTK2B,100157507:down|ssc:100048958,GNA14,100048958:down|ssc:100525148,PLCB3,100525148:down|ssc:100519810,PHKA2,100519810:down|ssc:100152612,-,100152612:down	http://www.genome.jp/kegg-bin/show_pathway?ssc04020/ssc:100525148%09blue/ssc:100519810%09blue/ssc:100152612%09blue/ssc:414911%09blue/ssc:100516581%09blue/ssc:100048958%09blue/ssc:100157507%09blue/ssc:100625720%09blue
RIG-I-like receptor signaling pathway	KEGG PATHWAY	ssc04622	3	54	0.915155	0.999929	ssc:100145895,ISG15,100145895:down|ssc:396880,-,396880:down|ssc:100620730,-,100620730:down	http://www.genome.jp/kegg-bin/show_pathway?ssc04622/ssc:396880%09blue/ssc:100620730%09blue/ssc:100145895%09blue
Oxytocin signaling pathway	KEGG PATHWAY	ssc04921	6	93	0.915248	0.999929	ssc:100516581,PLCB4,100516581:down|ssc:100134969,NFATC2,100134969:down|ssc:396851,PIK3R5,396851:down|ssc:100525148,PLCB3,100525148:down|ssc:100152215,-,100152215:down|ssc:733670,RGS2,733670:up	http://www.genome.jp/kegg-bin/show_pathway?ssc04921/ssc:100525148%09blue/ssc:733670%09red/ssc:100516581%09blue/ssc:100152215%09blue/ssc:100134969%09blue/ssc:396851%09blue
Arachidonic acid metabolism	KEGG PATHWAY	ssc00590	2	40	0.916749	0.999929	ssc:397112,TBXAS1,397112:down|ssc:100511161,PLA2G3,100511161:down	http://www.genome.jp/kegg-bin/show_pathway?ssc00590/ssc:100511161%09blue/ssc:397112%09blue
Retinol metabolism	KEGG PATHWAY	ssc00830	2	41	0.923163	0.999929	ssc:397082,DHRS4,397082:down|ssc:100519223,-,100519223:down	http://www.genome.jp/kegg-bin/show_pathway?ssc00830/ssc:397082%09blue/ssc:100519223%09blue
Peroxisome	KEGG PATHWAY	ssc04146	4	69	0.923176	0.999929	ssc:100152963,PEX2,100152963:up|ssc:397082,DHRS4,397082:down|ssc:100521480,GSTK1,100521480:up|ssc:100037287,DDO,100037287:up	http://www.genome.jp/kegg-bin/show_pathway?ssc04146/ssc:100037287%09red/ssc:397082%09blue/ssc:100152963%09red/ssc:100521480%09red
Alcoholism	KEGG PATHWAY	ssc05034	6	95	0.924075	0.999929	ssc:397495,BDNF,397495:down|ssc:100157763,-,100157763:down|ssc:100621915,HIST1H2BN,100621915:down|ssc:100516663,CREB3L1,100516663:down|ssc:100158121,-,100158121:down|ssc:100156932,-,100156932:down	http://www.genome.jp/kegg-bin/show_pathway?ssc05034/ssc:100516663%09blue/ssc:100621915%09blue/ssc:100156932%09blue/ssc:397495%09blue/ssc:100157763%09blue/ssc:100158121%09blue
Pyruvate metabolism	KEGG PATHWAY	ssc00620	1	25	0.924264	0.999929	ssc:100154828,ACSS1,100154828:down	http://www.genome.jp/kegg-bin/show_pathway?ssc00620/ssc:100154828%09blue
Epstein-Barr virus infection	KEGG PATHWAY	ssc05169	9	133	0.928326	0.999929	ssc:396851,PIK3R5,396851:down|ssc:414912,SPI1,414912:down|ssc:100152215,-,100152215:down|ssc:100525654,IL10RA,100525654:down|ssc:397106,IL10,397106:down|ssc:100153486,NFKBIE,100153486:down|ssc:100737040,POLR2A,100737040:down|ssc:100525150,CD44,100525150:down|ssc:100521261,POLR3K,100521261:up	http://www.genome.jp/kegg-bin/show_pathway?ssc05169/ssc:100737040%09blue/ssc:100153486%09blue/ssc:100152215%09blue/ssc:397106%09blue/ssc:100525150%09blue/ssc:100521261%09red/ssc:100525654%09blue/ssc:414912%09blue/ssc:396851%09blue
Purine metabolism	KEGG PATHWAY	ssc00230	8	121	0.928806	0.999929	ssc:100037271,ENPP1,100037271:down|ssc:100037941,PDE4B,100037941:down|ssc:100037967,PDE4D,100037967:down|ssc:100620914,AMPD3,100620914:down|ssc:100522261,-,100522261:down|ssc:100521261,POLR3K,100521261:up|ssc:100737040,POLR2A,100737040:down|ssc:100157138,PNP,100157138:down	http://www.genome.jp/kegg-bin/show_pathway?ssc00230/ssc:100737040%09blue/ssc:100157138%09blue/ssc:100037967%09blue/ssc:100037271%09blue/ssc:100620914%09blue/ssc:100521261%09red/ssc:100037941%09blue/ssc:100522261%09blue
Ribosome biogenesis in eukaryotes	KEGG PATHWAY	ssc03008	3	58	0.936041	0.999929	ssc:100524961,DROSHA,100524961:down|ssc:100627271,WDR36,100627271:down|ssc:100522095,RPP25L,100522095:up	http://www.genome.jp/kegg-bin/show_pathway?ssc03008/ssc:100524961%09blue/ssc:100522095%09red/ssc:100627271%09blue
Non-small cell lung cancer	KEGG PATHWAY	ssc05223	1	27	0.93791	0.999929	ssc:396851,PIK3R5,396851:down	http://www.genome.jp/kegg-bin/show_pathway?ssc05223/ssc:396851%09blue
Vasopressin-regulated water reabsorption	KEGG PATHWAY	ssc04962	1	27	0.93791	0.999929	ssc:100516663,CREB3L1,100516663:down	http://www.genome.jp/kegg-bin/show_pathway?ssc04962/ssc:100516663%09blue
Endometrial cancer	KEGG PATHWAY	ssc05213	1	27	0.93791	0.999929	ssc:396851,PIK3R5,396851:down	http://www.genome.jp/kegg-bin/show_pathway?ssc05213/ssc:396851%09blue
Amphetamine addiction	KEGG PATHWAY	ssc05031	2	44	0.939717	0.999929	ssc:100512594,STX1A,100512594:down|ssc:100516663,CREB3L1,100516663:down	http://www.genome.jp/kegg-bin/show_pathway?ssc05031/ssc:100516663%09blue/ssc:100512594%09blue
MicroRNAs in cancer	KEGG PATHWAY	ssc05206	11	162	0.943201	0.999929	ssc:100153257,MMP16,100153257:down|ssc:100316578,ssc-mir-101-2,100316578:up|ssc:100157844,PIM1,100157844:down|ssc:654325,MMP9,654325:down|ssc:396985,PLAU,396985:down|ssc:100152215,-,100152215:down|ssc:397063,ITGB3,397063:down|ssc:100739669,ZEB2,100739669:down|ssc:100127483,BMPR2,100127483:down|ssc:100525150,CD44,100525150:down|ssc:100155091,ITGA5,100155091:down	http://www.genome.jp/kegg-bin/show_pathway?ssc05206/ssc:100127483%09blue/ssc:397063%09blue/ssc:100157844%09blue/ssc:100152215%09blue/ssc:654325%09blue/ssc:100316578%09red/ssc:100525150%09blue/ssc:396985%09blue/ssc:100153257%09blue/ssc:100739669%09blue/ssc:100155091%09blue
Oxidative phosphorylation	KEGG PATHWAY	ssc00190	7	113	0.943479	0.999929	ssc:100523998,-,100523998:down|ssc:100739619,NDUFB1,100739619:up|ssc:733605,NDUFB6,733605:up|ssc:100522775,NDUFB11,100522775:up|ssc:100154443,NDUFA8,100154443:up|ssc:397472,ATP6V1H,397472:down|ssc:100523751,NDUFB5,100523751:up	http://www.genome.jp/kegg-bin/show_pathway?ssc00190/ssc:100154443%09red/ssc:100522775%09red/ssc:100739619%09red/ssc:397472%09blue/ssc:100523751%09red/ssc:733605%09red/ssc:100523998%09blue
Tyrosine metabolism	KEGG PATHWAY	ssc00350	1	28	0.943781	0.999929	ssc:100623036,FAH,100623036:up	http://www.genome.jp/kegg-bin/show_pathway?ssc00350/ssc:100623036%09red
Hedgehog signaling pathway	KEGG PATHWAY	ssc04340	1	28	0.943781	0.999929	ssc:100113425,BMP4,100113425:down	http://www.genome.jp/kegg-bin/show_pathway?ssc04340/ssc:100113425%09blue
ABC transporters	KEGG PATHWAY	ssc02010	1	29	0.949098	0.999929	ssc:100127449,ABCC9,100127449:down	http://www.genome.jp/kegg-bin/show_pathway?ssc02010/ssc:100127449%09blue
Glycine, serine and threonine metabolism	KEGG PATHWAY	ssc00260	1	31	0.958271	0.999929	ssc:100126844,GATM,100126844:up	http://www.genome.jp/kegg-bin/show_pathway?ssc00260/ssc:100126844%09red
Cysteine and methionine metabolism	KEGG PATHWAY	ssc00270	1	31	0.958271	0.999929	ssc:100312964,CDO1,100312964:up	http://www.genome.jp/kegg-bin/show_pathway?ssc00270/ssc:100312964%09red
AMPK signaling pathway	KEGG PATHWAY	ssc04152	4	80	0.962809	0.999929	ssc:100144446,HMGCR,100144446:up|ssc:397038,FBP1,397038:down|ssc:396851,PIK3R5,396851:down|ssc:100516663,CREB3L1,100516663:down	http://www.genome.jp/kegg-bin/show_pathway?ssc04152/ssc:100144446%09red/ssc:397038%09blue/ssc:100516663%09blue/ssc:396851%09blue
Circadian entrainment	KEGG PATHWAY	ssc04713	2	50	0.963213	0.999929	ssc:100516581,PLCB4,100516581:down|ssc:100525148,PLCB3,100525148:down	http://www.genome.jp/kegg-bin/show_pathway?ssc04713/ssc:100525148%09blue/ssc:100516581%09blue
Parkinson's disease	KEGG PATHWAY	ssc05012	7	122	0.965747	0.999929	ssc:100739619,NDUFB1,100739619:up|ssc:100513283,APAF1,100513283:down|ssc:733605,NDUFB6,733605:up|ssc:100154443,NDUFA8,100154443:up|ssc:100522775,NDUFB11,100522775:up|ssc:100523751,NDUFB5,100523751:up|ssc:100152612,-,100152612:down	http://www.genome.jp/kegg-bin/show_pathway?ssc05012/ssc:100513283%09blue/ssc:100154443%09red/ssc:100152612%09blue/ssc:100522775%09red/ssc:100739619%09red/ssc:100523751%09red/ssc:733605%09red
Adipocytokine signaling pathway	KEGG PATHWAY	ssc04920	2	51	0.966154	0.999929	ssc:397201,JAK2,397201:down|ssc:100153486,NFKBIE,100153486:down	http://www.genome.jp/kegg-bin/show_pathway?ssc04920/ssc:397201%09blue/ssc:100153486%09blue
Basal cell carcinoma	KEGG PATHWAY	ssc05217	1	34	0.969028	0.999929	ssc:100113425,BMP4,100113425:down	http://www.genome.jp/kegg-bin/show_pathway?ssc05217/ssc:100113425%09blue
Tryptophan metabolism	KEGG PATHWAY	ssc00380	1	34	0.969028	0.999929	ssc:100520985,KYNU,100520985:down	http://www.genome.jp/kegg-bin/show_pathway?ssc00380/ssc:100520985%09blue
Nucleotide excision repair	KEGG PATHWAY	ssc03420	1	34	0.969028	0.999929	ssc:606742,CETN2,606742:up	http://www.genome.jp/kegg-bin/show_pathway?ssc03420/ssc:606742%09red
Retrograde endocannabinoid signaling	KEGG PATHWAY	ssc04723	2	53	0.971371	0.999929	ssc:100516581,PLCB4,100516581:down|ssc:100525148,PLCB3,100525148:down	http://www.genome.jp/kegg-bin/show_pathway?ssc04723/ssc:100525148%09blue/ssc:100516581%09blue
GABAergic synapse	KEGG PATHWAY	ssc04727	2	54	0.973679	0.999929	ssc:100736934,HAP1,100736934:down|ssc:100627516,SLC38A5,100627516:up	http://www.genome.jp/kegg-bin/show_pathway?ssc04727/ssc:100736934%09blue/ssc:100627516%09red
Metabolic pathways	KEGG PATHWAY	ssc01100	73	872	0.97454	0.999929	ssc:397209,GFPT1,397209:down|ssc:100739304,-,100739304:up|ssc:397599,B3GNT5,397599:down|ssc:100157459,MMAB,100157459:up|ssc:397082,DHRS4,397082:down|ssc:100522261,-,100522261:down|ssc:100522855,HK3,100522855:down|ssc:397264,CKM,397264:down|ssc:397634,B3GALNT1,397634:up|ssc:100520985,KYNU,100520985:down|ssc:100127150,TKT,100127150:down|ssc:100233182,GK,100233182:down|ssc:100147712,HSD17B1,10014771…	http://www.genome.jp/kegg-bin/show_pathway?ssc01100/ssc:100737040%09blue/ssc:100126844%09red/ssc:100623848%09red/ssc:100522775%09red/ssc:100312971%09red/ssc:100147712%09blue/ssc:100157004%09blue/ssc:100127150%09blue/ssc:100144446%09red/ssc:100514142%09red/ssc:100522855%09blue/ssc:100522018%09blue/ssc:100511161%09blue/ssc:100154650%09blue/ssc:595123%09red/ssc:100524195%09blue/ssc:100520985%09blue/…
N-Glycan biosynthesis	KEGG PATHWAY	ssc00510	1	36	0.974611	0.999929	ssc:100154397,MAN2A2,100154397:down	http://www.genome.jp/kegg-bin/show_pathway?ssc00510/ssc:100154397%09blue
Neuroactive ligand-receptor interaction	KEGG PATHWAY	ssc04080	13	204	0.975135	0.999929	ssc:414911,EDNRB,414911:down|ssc:503666,P2RY1,503666:down|ssc:100127164,PTGER2,100127164:down|ssc:100524766,P2RY13,100524766:down|ssc:100624513,GRIK1,100624513:up|ssc:100154607,S1PR3,100154607:down|ssc:100524418,PTGDR,100524418:down|ssc:100302368,-,100302368:up|ssc:397547,NPY1R,397547:up|ssc:100513414,CHRNA9,100513414:up|ssc:100625720,HRH2,100625720:down|ssc:100519703,F2RL1,100519703:down|ssc:100…	http://www.genome.jp/kegg-bin/show_pathway?ssc04080/ssc:100233183%09blue/ssc:100127164%09blue/ssc:100524766%09blue/ssc:100519703%09blue/ssc:503666%09blue/ssc:414911%09blue/ssc:100513414%09red/ssc:100154607%09blue/ssc:397547%09red/ssc:100302368%09red/ssc:100625720%09blue/ssc:100624513%09red/ssc:100524418%09blue
Progesterone-mediated oocyte maturation	KEGG PATHWAY	ssc04914	2	55	0.975808	0.999929	ssc:396851,PIK3R5,396851:down|ssc:100523972,RPS6KA1,100523972:down	http://www.genome.jp/kegg-bin/show_pathway?ssc04914/ssc:100523972%09blue/ssc:396851%09blue
Morphine addiction	KEGG PATHWAY	ssc05032	2	55	0.975808	0.999929	ssc:100037941,PDE4B,100037941:down|ssc:100037967,PDE4D,100037967:down	http://www.genome.jp/kegg-bin/show_pathway?ssc05032/ssc:100037941%09blue/ssc:100037967%09blue
RNA degradation	KEGG PATHWAY	ssc03018	2	56	0.977769	0.999929	ssc:100048932,BTG2,100048932:down|ssc:100157750,ENO2,100157750:up	http://www.genome.jp/kegg-bin/show_pathway?ssc03018/ssc:100157750%09red/ssc:100048932%09blue
Proteasome	KEGG PATHWAY	ssc03050	1	39	0.981157	0.999929	ssc:397572,PSME1,397572:up	http://www.genome.jp/kegg-bin/show_pathway?ssc03050/ssc:397572%09red
Ubiquitin mediated proteolysis	KEGG PATHWAY	ssc04120	4	91	0.982702	0.999929	ssc:100626356,UBE2H,100626356:down|ssc:100621770,UBE2Q2,100621770:down|ssc:100620112,FBXW7,100620112:down|ssc:100621690,CBLB,100621690:down	http://www.genome.jp/kegg-bin/show_pathway?ssc04120/ssc:100621690%09blue/ssc:100626356%09blue/ssc:100620112%09blue/ssc:100621770%09blue
Cell cycle	KEGG PATHWAY	ssc04110	3	78	0.985662	0.999929	ssc:100525560,CDKN2D,100525560:up|ssc:100152215,-,100152215:down|ssc:100521487,WEE1,100521487:down	http://www.genome.jp/kegg-bin/show_pathway?ssc04110/ssc:100521487%09blue/ssc:100152215%09blue/ssc:100525560%09red
Dopaminergic synapse	KEGG PATHWAY	ssc04728	3	78	0.985662	0.999929	ssc:100516581,PLCB4,100516581:down|ssc:100525148,PLCB3,100525148:down|ssc:100516663,CREB3L1,100516663:down	http://www.genome.jp/kegg-bin/show_pathway?ssc04728/ssc:100525148%09blue/ssc:100516663%09blue/ssc:100516581%09blue
Serotonergic synapse	KEGG PATHWAY	ssc04726	2	64	0.988782	0.999929	ssc:100516581,PLCB4,100516581:down|ssc:100525148,PLCB3,100525148:down	http://www.genome.jp/kegg-bin/show_pathway?ssc04726/ssc:100525148%09blue/ssc:100516581%09blue
Cardiac muscle contraction	KEGG PATHWAY	ssc04260	1	58	0.997153	0.999929	ssc:397458,SLC9A1,397458:down	http://www.genome.jp/kegg-bin/show_pathway?ssc04260/ssc:397458%09blue
Ribosome	KEGG PATHWAY	ssc03010	4	116	0.997287	0.999929	ssc:100157118,MRPL14,100157118:up|ssc:100519675,RPL35A,100519675:up|ssc:100620434,-,100620434:up|ssc:100739774,MRPS14,100739774:up	http://www.genome.jp/kegg-bin/show_pathway?ssc03010/ssc:100519675%09red/ssc:100739774%09red/ssc:100620434%09red/ssc:100157118%09red
RNA transport	KEGG PATHWAY	ssc03013	3	113	0.999159	0.999929	ssc:100515926,NUP210,100515926:down|ssc:100522095,RPP25L,100522095:up|ssc:100624304,-,100624304:down	http://www.genome.jp/kegg-bin/show_pathway?ssc03013/ssc:100624304%09blue/ssc:100522095%09red/ssc:100515926%09blue
Protein processing in endoplasmic reticulum	KEGG PATHWAY	ssc04141	3	113	0.999159	0.999929	ssc:407060,HSPA5,407060:down|ssc:100522679,PPP1R15A,100522679:down|ssc:100520400,YOD1,100520400:down	http://www.genome.jp/kegg-bin/show_pathway?ssc04141/ssc:407060%09blue/ssc:100520400%09blue/ssc:100522679%09blue
Oocyte meiosis	KEGG PATHWAY	ssc04114	1	76	0.999526	0.999929	ssc:100523972,RPS6KA1,100523972:down	http://www.genome.jp/kegg-bin/show_pathway?ssc04114/ssc:100523972%09blue
Spliceosome	KEGG PATHWAY	ssc03040	1	95	0.999929	0.999929	ssc:100154606,SNRPC,100154606:up	http://www.genome.jp/kegg-bin/show_pathway?ssc03040/ssc:100154606%09red
